# Supplementary material for: Pupil dilation offers a time-window on prediction error
Source: eLife. 2026 Jan 8;14:RP105287. doi: 10.7554/eLife.105287 (PMC12782557; doi:10.7554/eLife.105287)
Supplement: Appendix 1—figure 1—source data 1. [file elife-105287-app1-fig1-data1.xlsx]

## Sheet: top row (cue-target)
subject	20_accuracy	80_accuracy	20_pupil_t1	80_pupil_t1	20_pupil_t2	80_pupil_t2
sub-1	0.230769	0.812903	-0.467	-0.212782	0.423343	-0.4203
sub-10	0.05	0.948718	-0.311867	-2.13415	-0.312754	-1.09729
sub-11	0.075	0.90566	-2.7594	-2.40644	-2.35622	-1.19594
sub-12	0.25	0.738854	1.53998	0.476067	1.7343	0.39263
sub-13	0.05	0.905063	-1.12348	-3.43205	-1.17687	-4.46384
sub-14	0.025641	0.91195	1.27508	-2.28637	5.6103	-0.185675
sub-15	0.15	0.924051	1.42116	-0.203707	2.43032	-1.27555
sub-16	0.2	0.836478	0.415606	-1.10038	-4.28365	-5.58106
sub-18	0.05	0.955975	1.40229	-1.54026	-0.583551	-1.82919
sub-19	0.282051	0.825806	0.130565	-0.0841991	-2.03489	-0.952171
sub-20	0.1	0.886076	0.924111	0.158152	0.0726963	-0.14288
sub-21	0.075	0.886792	3.43881	0.40391	0.486943	-2.78807
sub-23	0.361111	0.664557	0.388588	0.220582	0.490815	0.562645
sub-24	0.325	0.582278	-1.88046	-1.41236	-3.14852	-2.09406
sub-25	0.425	0.610063	-2.56392	-2.69128	-0.298577	-0.689547
sub-26	0.15	0.842767	-2.20175	-1.59803	-2.45535	-0.718025
sub-27	0.025641	0.916129	1.75993	0.598003	-0.215649	-3.44305
sub-31	0.153846	0.867925	3.41715	0.861244	4.34853	0.706203
sub-32	0.025641	0.872611	5.10358	1.29231	2.94778	0.246058
sub-33	0.0789474	0.903226	2.97455	0.255453	-0.602866	-3.49854
sub-4	0.15	0.815287	0.902633	0.0769359	-0.498973	-0.594314
sub-5	0.102564	0.849057	1.94821	1.23035	1.36882	1.10944
sub-7	0.15	0.724359	1.41291	-0.444848	2.25054	-0.98437
sub-9	0.358974	0.738854	1.4301	-0.0682183	1.40933	-0.44929

## Sheet: bottom row (letter-color)
subject	20_accuracy	80_accuracy	20_pupil_t1	80_pupil_t1	20_pupil_t2	80_pupil_t2
102	0.789474	0.822785	2.39927	4.65058	1.02261	0.959661
103	0.807692	0.8125	3.4988	3.34911	-0.843775	-3.36971
104	0.5	0.736842	5.59867	2.28751	2.92742	1.35208
105	0.835443	0.860759	4.94823	0.849985	4.3389	2.62155
106	0.575	0.6625	8.47789	7.45098	-2.63545	-2.51297
107	0.782051	0.746835	3.54422	1.21802	-2.71215	-1.84542
108	0.775	0.8625	4.20647	4.64877	0.0830642	-1.39128
109	0.78481	0.481013	1.69862	1.77294	0.643953	1.12867
110	0.8625	0.8875	2.91129	1.37989	-1.67744	-0.534394
111	0.8375	0.9	-0.279176	3.60934	-1.00057	2.44335
112	0.45	0.65	3.29302	2.31635	1.65059	0.295773
113	0.924051	0.9125	4.04304	3.05238	3.71533	1.22887
114	0.925	0.9375	2.32006	3.56598	-2.64144	-1.17999
115	0.594937	0.632911	0.712215	1.11844	-3.366	-1.37071
116	0.8875	0.8625	2.81233	2.68714	0.959976	0.232332
117	0.78481	0.6375	1.47358	2.76284	-0.820959	-0.823087
118	0.797468	0.734177	2.29312	3.71465	1.06747	2.45323
119	0.9125	0.871795	3.03855	1.88409	-1.1743	-1.63284
120	0.8875	0.8875	-0.941609	-0.898631	-2.79343	-4.52405
122	0.825	0.848101	3.37405	3.63683	0.404513	2.48257
123	0.875	0.9	0.0941092	1.57893	-0.641587	2.3258
124	0.835443	0.824324	0.375382	2.23042	-1.36146	0.0991637
125	0.875	0.886076	6.05387	5.48739	-0.619153	5.71663
126	0.64557	0.7375	0.805895	1.37843	-0.482483	1.67422
127	0.825	0.848101	2.4378	3.20127	-0.905137	3.58037
128	0.8875	0.9875	4.0799	1.37756	4.34339	0.685945
129	0.8625	0.9	0.909793	2.12241	-2.18124	-1.64419
130	0.825	0.868421	-0.503183	0.385096	0.265146	0.632627
131	0.9125	0.95	1.89948	3.00119	0.299951	0.198394
132	0.962025	0.95	-0.578039	-0.509267	1.55903	0.400264
133	0.924051	0.9375	1.84652	1.88225	-0.871292	-2.25823
134	0.5	0.6625	4.29732	4.00019	-3.57006	-1.93086
135	0.825	0.875	2.89127	2.69293	-1.42704	0.272448
136	0.662338	0.6	3.99129	2.70161	0.770611	0.146806
137	0.934211	0.789474	2.02757	2.33057	-0.304567	1.47783
138	0.9125	0.924051	0.976764	0.892014	1.00555	0.853189
139	0.924051	0.9125	1.61338	0.397557	-0.560657	-1.89602
140	0.7625	0.8375	3.52796	2.28558	-1.29116	-1.77787
142	0.9625	0.9875	3.82198	1.29449	0.900647	-0.404646
143	0.9	0.8625	1.06939	1.02903	-0.728053	0.00025245
144	0.7125	0.797468	2.97832	2.51241	0.800467	1.08277
146	0.797468	0.85	1.4733	0.764748	0.744921	-2.94414
147	0.831169	0.898734	2.37781	2.93613	-0.903111	-0.619824
148	0.844156	0.835443	6.1834	5.99321	2.46447	1.48697
149	0.8875	0.848101	3.90582	2.47078	2.82925	1.41825
150	0.935897	0.8875	4.04692	3.86525	0.0704036	-0.600712
151	0.911392	0.898734	4.31884	2.54945	-0.687125	-2.12579
