# Supplementary material for: Pupil dilation offers a time-window on prediction error
Source: eLife. 2026 Jan 8;14:RP105287. doi: 10.7554/eLife.105287 (PMC12782557; doi:10.7554/eLife.105287)
Supplement: Appendix 3—figure 1—source data 1. [file elife-105287-app3-fig1-data1.xlsx]

## Sheet: panel A
	subject	0	1	2	3	4	5	6	7	8	9	10	11	12	13	14	15	16	17	18	19	20	21	22	23	24	25	26	27	28	29	30	31	32	33	34	35	36	37	38	39	40	41	42	43	44	45	46	47
0	206	-0.622284	-0.620549	-0.618808	-0.617062	-0.615311	-0.613555	-0.611795	-0.610029	-0.608259	-0.606485	-0.604706	-0.602923	-0.601135	-0.599343	-0.597547	-0.595746	-0.593942	-0.592133	-0.590321	-0.588505	-0.586685	-0.584861	-0.583034	-0.581202	-0.579367	-0.572688	-0.57085	-0.569009	-0.567163	-0.565314	-0.563461	-0.561604	-0.559744	-0.557879	-0.556011	-0.554138	-0.552262	-0.54554	-0.543659	-0.541774	-0.539884	-0.537989	-0.53609	-0.534186	-0.532276	-0.530361	-0.528441	-0.526515
0	207	0.303074	0.309096	0.308239	0.307385	0.306533	0.305685	0.308279	0.307436	0.306596	0.30576	0.304929	0.304101	0.303278	0.302459	0.301645	0.300836	0.300031	0.299233	0.298439	0.297652	0.29687	0.296094	0.295325	0.294561	0.293805	0.293055	0.292311	0.291575	0.290846	0.290124	0.28941	0.288703	0.288004	0.287312	0.286628	0.285953	0.285285	0.284625	0.283973	0.28333	0.282695	0.282068	0.281449	0.280838	0.280236	0.279642	0.279056	0.278478
0	208	0.18131	0.180361	0.179531	0.178705	0.177884	0.181774	0.180957	0.180145	0.179224	0.178423	0.177628	0.176838	0.176054	0.175276	0.174503	0.173737	0.172977	0.172224	0.171476	0.170621	0.169886	0.169158	0.168322	0.167607	0.166899	0.166197	0.165387	0.164699	0.164016	0.163226	0.162556	0.161893	0.161236	0.160585	0.15994	0.159186	0.158553	0.157925	0.157303	0.156685	0.156073	0.155466	0.154863	0.154265	0.153442	0.152853	0.152268	0.151686
0	209	-0.0419103	-0.0419125	-0.0421904	-0.0421965	-0.042205	-0.0422156	-0.0366876	-0.0367078	-0.0311894	-0.0312192	-0.0312512	-0.0312854	-0.0313219	-0.0313607	-0.0314018	-0.0314452	-0.031491	-0.0262716	-0.0263266	-0.0263839	-0.0264438	-0.0265061	-0.0265709	-0.0266382	-0.0267082	-0.0270542	-0.027129	-0.0272064	-0.0275601	-0.0276427	-0.0277282	-0.0280901	-0.028181	-0.028275	-0.0228312	-0.0173958	-0.0175094	-0.0176264	-0.0180201	-0.0181433	-0.0185434	-0.0186731	-0.0188063	-0.0189432	-0.0190838	-0.0192281	-0.0193762	-0.0195282
0	210	0.140338	0.139743	0.139133	0.138508	0.137869	0.136985	0.136316	0.138267	0.137566	0.136621	0.135892	0.134689	0.133703	0.135109	0.134323	0.133523	0.13271	0.134518	0.133676	0.132591	0.131724	0.130844	0.129952	0.129047	0.130766	0.129606	0.128664	0.127482	0.12629	0.125316	0.124333	0.12311	0.122107	0.121094	0.120073	0.119042	0.117773	0.116726	0.118305	0.11701	0.115937	0.114857	0.11377	0.112447	0.113983	0.112875	0.111532	0.110415
0	211	-0.102773	-0.102311	-0.101849	-0.101385	-0.100922	-0.100458	-0.0999939	-0.0995297	-0.0968851	-0.0964247	-0.0959645	-0.0955045	-0.0950448	-0.0945854	-0.0941271	-0.0936688	-0.093211	-0.092754	-0.0922988	-0.0918432	-0.0913886	-0.0909348	-0.090482	-0.0900303	-0.0895797	-0.0891308	-0.0886825	-0.0882355	-0.0877898	-0.087346	-0.0869031	-0.0864615	-0.086022	-0.0855835	-0.085147	-0.0847116	-0.0842778	-0.0838461	-0.0834167	-0.0829878	-0.0825605	-0.0821349	-0.081711	-0.0812887	-0.0808681	-0.0804491	-0.0800317	-0.0796165
0	212	-0.132193	-0.131067	-0.129949	-0.128841	-0.127741	-0.12665	-0.125569	-0.124497	-0.123434	-0.120547	-0.119508	-0.118478	-0.117459	-0.11645	-0.115451	-0.114462	-0.113485	-0.112518	-0.111562	-0.110616	-0.109682	-0.108759	-0.107847	-0.106946	-0.106057	-0.105179	-0.104312	-0.103457	-0.102613	-0.101781	-0.10096	-0.100151	-0.0993529	-0.0985666	-0.0977917	-0.0970282	-0.0962761	-0.0955353	-0.0948058	-0.0940876	-0.0933806	-0.0926846	-0.0919996	-0.0913256	-0.0906624	-0.09001	-0.0893681	-0.0887368
0	213	0.0464652	0.048069	0.0496743	0.0512803	0.0528863	0.0544917	0.0560958	0.0576979	0.0592973	0.0608933	0.0624853	0.0640726	0.0656544	0.0743956	0.0759567	0.0775105	0.0790562	0.0805933	0.0821211	0.0836389	0.0851462	0.0866423	0.0881266	0.0895986	0.0910576	0.0925032	0.0939346	0.102517	0.103911	0.105289	0.113816	0.115153	0.116474	0.117776	0.119061	0.120327	0.121574	0.122802	0.12401	0.125199	0.126367	0.127514	0.12864	0.129745	0.130828	0.13189	0.13293	0.133947
0	214	0.0707817	0.0697825	0.0687915	0.0678089	0.066835	0.0658699	0.0649139	0.0639672	0.06303	0.0621027	0.0611852	0.0602778	0.0593806	0.058494	0.057618	0.0567528	0.0558985	0.0550554	0.0542236	0.0534031	0.052594	0.0517966	0.0510109	0.0502369	0.0494747	0.0487245	0.0479862	0.0472599	0.0465456	0.0458435	0.0451536	0.0444754	0.0438092	0.043155	0.0425128	0.0418824	0.041264	0.0406573	0.0400623	0.0394789	0.0389072	0.0383469	0.0377978	0.0372598	0.036733	0.0362171	0.0357118	0.035217
0	215	-0.335094	-0.334963	-0.334821	-0.334668	-0.334504	-0.334329	-0.334142	-0.333943	-0.333731	-0.333507	-0.33327	-0.333019	-0.332755	-0.332477	-0.332185	-0.331877	-0.331554	-0.331216	-0.330861	-0.33049	-0.330103	-0.329698	-0.329275	-0.328834	-0.328374	-0.327896	-0.327398	-0.32688	-0.326341	-0.325782	-0.325202	-0.319985	-0.319368	-0.318729	-0.318066	-0.317381	-0.316671	-0.315938	-0.31518	-0.314397	-0.313589	-0.312756	-0.311897	-0.311011	-0.310099	-0.309161	-0.308195	-0.307202
0	216	0.175232	0.174658	0.174072	0.173475	0.172866	0.172247	0.171618	0.170979	0.170331	0.169674	0.169009	0.168335	0.167654	0.166966	0.16627	0.165568	0.16486	0.164147	0.163427	0.162703	0.161973	0.161239	0.160501	0.159758	0.159012	0.158263	0.15751	0.156754	0.155996	0.157446	0.15668	0.155912	0.155142	0.15437	0.153597	0.155032	0.154253	0.153472	0.15269	0.154118	0.153331	0.152542	0.151753	0.150962	0.150169	0.149376	0.148581	0.147785
0	217	0.159518	0.15609	0.152691	0.149291	0.145904	0.142533	0.139178	0.135838	0.132513	0.129207	0.125936	0.122665	0.119413	0.11618	0.112967	0.109773	0.106599	0.103445	0.100313	0.0972018	0.0941208	0.0910534	0.0880168	0.0849946	0.0819954	0.0790279	0.0760756	0.0731472	0.070243	0.0673632	0.064508	0.0616777	0.0588723	0.0560921	0.0533373	0.0506054	0.0479017	0.0452211	0.0425689	0.0399425	0.037342	0.0347675	0.032219	0.0296939	0.0271973	0.0247266	0.0222819	0.019863
0	218	-0.323268	-0.323498	-0.3237	-0.323874	-0.324019	-0.324137	-0.324226	-0.319853	-0.31989	-0.319899	-0.319879	-0.319832	-0.319756	-0.319652	-0.319521	-0.319362	-0.319176	-0.318962	-0.318722	-0.318455	-0.318163	-0.317844	-0.3175	-0.31713	-0.316736	-0.316318	-0.315876	-0.31541	-0.314921	-0.31441	-0.313877	-0.313323	-0.312747	-0.312152	-0.311536	-0.310901	-0.310247	-0.309576	-0.308887	-0.30818	-0.307458	-0.30672	-0.305967	-0.305199	-0.304417	-0.303622	-0.302815	-0.301996
0	219	-0.172353	-0.17098	-0.169586	-0.168174	-0.166741	-0.16529	-0.163819	-0.16233	-0.160821	-0.159293	-0.157747	-0.156182	-0.154598	-0.153567	-0.151786	-0.150432	-0.148774	-0.147098	-0.145404	-0.143692	-0.141963	-0.140216	-0.138738	-0.136955	-0.135442	-0.133625	-0.131791	-0.130226	-0.128358	-0.126473	-0.124572	-0.122654	-0.12072	-0.11877	-0.117089	-0.115107	-0.113108	-0.111093	-0.109063	-0.106858	-0.104797	-0.10272	-0.100629	-0.0985221	-0.0964002	-0.0942634	-0.0921118	-0.0902309
0	220	-0.107245	-0.102149	-0.101209	-0.100284	-0.099373	-0.0984767	-0.0975953	-0.0967294	-0.0958786	-0.0950421	-0.0942206	-0.0934147	-0.0926238	-0.0918479	-0.091087	-0.0903403	-0.0896092	-0.0847582	-0.0840621	-0.0833815	-0.0827155	-0.0820641	-0.0814261	-0.0808038	-0.0801959	-0.0796022	-0.0790227	-0.0784572	-0.0779051	-0.0773674	-0.0768427	-0.0763322	-0.075835	-0.075351	-0.07488	-0.0744219	-0.0739764	-0.0735434	-0.0731227	-0.0727134	-0.0723165	-0.0719313	-0.0715575	-0.0711948	-0.070843	-0.0705019	-0.0701712	-0.0698507
[truncated: 3,452 more columns]

## Sheet: panel B
	subject	r	0	1	2	3	4	5	6	7	8	9	10	11	12	13	14	15	16	17	18	19	20	21	22	23	24	25	26	27	28	29	30	31	32	33	34	35	36	37	38	39	40	41	42	43	44	45	46
0	206	0	-0.882981	-0.878721	-0.874454	-0.870179	-0.865897	-0.861608	-0.857313	-0.85301	-0.848701	-0.844386	-0.840064	-0.835737	-0.831403	-0.827065	-0.82272	-0.818371	-0.814016	-0.809657	-0.805294	-0.800926	-0.796554	-0.792179	-0.7878	-0.783418	-0.779033	-0.774645	-0.770255	-0.765863	-0.761468	-0.757073	-0.752675	-0.748277	-0.743877	-0.739477	-0.735077	-0.730677	-0.726276	-0.721876	-0.717476	-0.713077	-0.708679	-0.704282	-0.699887	-0.695493	-0.691101	-0.686711	-0.682323
1	206	3	-0.862621	-0.859135	-0.855649	-0.852164	-0.84868	-0.845197	-0.841716	-0.838238	-0.834762	-0.831289	-0.82782	-0.824354	-0.820893	-0.817435	-0.813982	-0.810534	-0.80709	-0.803652	-0.80022	-0.796794	-0.793373	-0.789959	-0.786551	-0.78315	-0.779756	-0.776368	-0.772987	-0.769614	-0.766248	-0.762889	-0.759538	-0.756194	-0.752858	-0.74953	-0.746209	-0.742896	-0.739591	-0.736293	-0.733004	-0.729722	-0.726448	-0.723182	-0.719923	-0.716672	-0.713429	-0.710194	-0.706966
2	206	75	-0.665615	-0.666101	-0.66656	-0.666994	-0.667401	-0.667783	-0.668138	-0.668468	-0.668771	-0.669049	-0.669301	-0.669527	-0.669727	-0.669903	-0.670053	-0.670177	-0.670277	-0.670352	-0.670402	-0.670428	-0.670429	-0.670406	-0.670358	-0.670287	-0.670192	-0.670073	-0.66993	-0.669764	-0.669575	-0.669362	-0.669127	-0.668868	-0.668587	-0.668282	-0.667955	-0.667606	-0.667234	-0.637796	-0.637406	-0.636993	-0.636558	-0.636101	-0.635622	-0.635121	-0.634597	-0.634052	-0.633484
3	206	76	-0.189934	-0.188825	-0.187705	-0.186573	-0.185431	-0.184277	-0.183112	-0.181936	-0.180749	-0.179551	-0.178342	-0.177121	-0.17589	-0.174649	-0.173396	-0.172133	-0.170859	-0.169575	-0.168281	-0.166977	-0.165663	-0.164339	-0.163007	-0.161665	-0.160314	-0.158954	-0.157586	-0.15621	-0.154826	-0.153435	-0.152037	-0.150632	-0.149221	-0.147803	-0.146379	-0.144951	-0.143517	-0.142078	-0.140636	-0.13919	-0.13774	-0.136287	-0.134832	-0.133375	-0.131916	-0.130456	-0.128995
4	206	138	-0.825105	-0.823135	-0.821171	-0.819213	-0.817261	-0.815314	-0.813373	-0.811437	-0.809507	-0.807583	-0.805663	-0.803749	-0.801839	-0.799933	-0.798032	-0.796135	-0.794241	-0.792351	-0.790464	-0.788579	-0.786697	-0.784816	-0.782937	-0.781059	-0.779181	-0.74826	-0.746408	-0.744555	-0.7427	-0.740843	-0.738983	-0.737119	-0.735251	-0.733378	-0.731498	-0.729613	-0.72772	-0.725819	-0.723909	-0.721989	-0.720059	-0.718117	-0.716162	-0.714195	-0.712213	-0.710217	-0.708205
5	206	157	-0.307449	-0.307375	-0.307308	-0.307249	-0.307197	-0.307153	-0.307116	-0.307087	-0.307065	-0.307052	-0.307045	-0.307047	-0.307056	-0.307073	-0.307097	-0.307128	-0.307167	-0.307213	-0.307267	-0.307327	-0.307394	-0.307468	-0.30755	-0.307637	-0.30773	-0.307829	-0.307934	-0.308045	-0.308161	-0.308281	-0.308407	-0.308536	-0.308669	-0.308806	-0.308946	-0.309088	-0.309232	-0.309378	-0.309525	-0.309673	-0.309821	-0.309967	-0.310113	-0.310258	-0.310399	-0.310538	-0.310672
0	207	0	0.587763	0.587622	0.587464	0.587289	0.587097	0.586887	0.586659	0.586414	0.586151	0.585871	0.585572	0.585256	0.584922	0.58457	0.5842	0.583812	0.583406	0.582982	0.58254	0.58208	0.581602	0.581106	0.580592	0.580061	0.579511	0.578943	0.578358	0.577754	0.577133	0.576494	0.575837	0.575163	0.57447	0.57376	0.573032	0.572286	0.571523	0.570742	0.569943	0.569126	0.568291	0.567439	0.566568	0.56568	0.564774	0.56385	0.562908
1	207	3	0.310715	0.331366	0.331385	0.331418	0.331465	0.331527	0.331602	0.331692	0.331796	0.331913	0.332045	0.332191	0.33235	0.332524	0.332711	0.332912	0.333127	0.333355	0.333597	0.333853	0.334122	0.334404	0.334699	0.335008	0.335329	0.335664	0.336011	0.336371	0.336743	0.337127	0.337524	0.337932	0.338352	0.338783	0.339226	0.339679	0.340143	0.340617	0.341101	0.341595	0.342098	0.342609	0.343129	0.343657	0.344193	0.344736	0.345286
2	207	75	1.05055	1.04658	1.04262	1.0387	1.0348	1.03093	1.02709	1.02327	1.01948	1.01572	1.01199	1.00828	1.00461	1.00096	0.997333	0.993738	0.990171	0.986631	0.983119	0.979633	0.976175	0.972744	0.969339	0.965961	0.962609	0.959283	0.955982	0.952706	0.949456	0.946229	0.943027	0.939848	0.936692	0.933558	0.930447	0.927357	0.924288	0.921239	0.91821	0.915199	0.912207	0.909233	0.906276	0.903334	0.900408	0.897497	0.894599
3	207	76	0.158375	0.175606	0.172217	0.168854	0.165518	0.162209	0.158927	0.155673	0.152446	0.149247	0.146077	0.142936	0.139824	0.136741	0.133687	0.130664	0.127671	0.124709	0.121777	0.118877	0.116008	0.113171	0.110366	0.107593	0.104853	0.102145	0.0994712	0.0968303	0.0942228	0.0916491	0.0891094	0.0866037	0.0841324	0.0816955	0.0792933	0.0769257	0.074593	0.0722953	0.0700325	0.0678049	0.0656123	0.063455	0.0613328	0.0592457	0.0571938	0.055177	0.0531951
4	207	138	0.277054	0.275362	0.273653	0.271929	0.27019	0.268436	0.266668	0.264887	0.263092	0.261286	0.259467	0.257638	0.255798	0.253949	0.252091	0.250225	0.248351	0.246472	0.244586	0.242696	0.240802	0.238904	0.237005	0.235104	0.233203	0.231303	0.229404	0.227508	0.225615	0.223727	0.221844	0.219967	0.218098	0.216237	0.214386	0.212544	0.210714	0.208896	0.20709	0.205299	0.203523	0.201762	0.200018	0.198291	0.196583	0.194893	0.193224
5	207	157	-0.566018	-0.561954	-0.557909	-0.553882	-0.549873	-0.545881	-0.521269	-0.517322	-0.513391	-0.509477	-0.50558	-0.501699	-0.497835	-0.493986	-0.490154	-0.486338	-0.482537	-0.478752	-0.474982	-0.471228	-0.467488	-0.463763	-0.460054	-0.456358	-0.452677	-0.44901	-0.445358	-0.441719	-0.438093	-0.434481	-0.430882	-0.427296	-0.423723	-0.420162	-0.416614	-0.413077	-0.409552	-0.406038	-0.402536	-0.399044	-0.395562	-0.392091	-0.38863	-0.385178	-0.381736	-0.378302	-0.374878
0	208	0	-0.109468	-0.110561	-0.111635	-0.11269	-0.113726	-0.114743	-0.115741	-0.116719	-0.117677	-0.118616	-0.119536	-0.120437	-0.121318	-0.12218	-0.123023	-0.123847	-0.124652	-0.125439	-0.126208	-0.126959	-0.127693	-0.128408	-0.129107	-0.12979	-0.130455	-0.131105	-0.131739	-0.132358	-0.132962	-0.133552	-0.134127	-0.134689	-0.135238	-0.135774	-0.136298	-0.13681	-0.137311	-0.137801	-0.13828	-0.13875	-0.13921	-0.139661	-0.140104	-0.140539	-0.141655	-0.142074	-0.142487
1	208	3	0.356525	0.354079	0.351631	0.349181	0.346731	0.372513	0.370025	0.367536	0.364359	0.361871	0.359382	0.356893	0.354404	0.351916	0.349428	0.346941	0.344454	0.341969	0.339486	0.337004	0.334524	0.332047	0.329572	0.3271	0.324631	0.322165	0.319703	0.317245	0.314792	0.312342	0.309898	0.307458	0.305024	0.302595	0.300173	0.297756	0.295346	0.292942	0.290546	0.288156	0.285774	0.283399	0.281033	0.278674	0.275636	0.273295	0.270963
2	208	75	0.410671	0.407373	0.404767	0.402164	0.399564	0.396966	0.394372	0.391781	0.389193	0.386609	0.384028	0.38145	0.378877	0.376307	0.373741	0.37118	0.368623	0.36607	0.363523	0.36098	0.358442	0.35591	0.353384	0.350863	0.348348	0.34584	0.34265	0.340156	0.337668	0.335188	0.332715	0.330249	0.32779	0.32534	0.322897	0.320463	0.318036	0.315618	0.313209	0.310808	0.308416	0.306033	0.303659	0.301295	0.29894	0.296594	0.294257
3	208	76	0.125914	0.123519	0.121139	0.118772	0.11642	0.114084	0.111762	0.109457	0.107169	0.104897	0.102642	0.100406	0.0981869	0.0959867	0.0938054	0.0916432	0.0895005	0.0873777	0.0852749	0.0831925	0.0811307	0.0790897	0.0763823	0.0743849	0.0724089	0.0704545	0.0685216	0.0666106	0.0647213	0.0621663	0.0603221	0.0584998	0.0566993	0.0549207	0.0531639	0.0507413	0.0490291	0.0473384	0.045669	0.0440208	0.0423935	0.040787	0.0392011	0.0376354	0.0360897	0.0345637	0.033057
4	208	138	0.376605	0.378856	0.381071	0.383252	0.385399	0.38751	0.389586	0.391627	0.393632	0.395602	0.397537	0.399436	0.401301	0.40313	0.404923	0.406682	0.408406	0.410096	0.411751	0.412685	0.414273	0.415828	0.41735	0.418839	0.420295	0.42172	0.423112	0.424474	0.425804	0.427104	0.428375	0.429616	0.430828	0.432011	0.433167	0.434296	0.435397	0.436473	0.437523	0.438547	0.439548	0.440524	0.441477	0.442407	0.443315	0.444201	0.445067
5	208	157	-0.0723899	-0.0711029	-0.0697895	-0.0684492	-0.0670816	-0.0656865	-0.0642634	-0.0628122	-0.0613327	-0.0598246	-0.0582879	-0.0567226	-0.0551286	-0.0535059	-0.0518548	-0.0501752	-0.0484675	-0.0467318	-0.0449686	-0.0431781	-0.0413608	-0.0395171	-0.0376477	-0.035753	-0.0338336	-0.0318904	-0.029924	-0.0279351	-0.0259247	-0.0238936	-0.0218428	-0.0197732	-0.0176858	-0.0155818	-0.0134621	-0.0113279	-0.00918047	-0.00702088	-0.00485042	-0.00267032	-0.000481868	0.00171362	0.00391484	0.00612042	0.00832902	0.0105393	0.0127497
0	209	0	0.130931	0.129571	0.128229	0.126905	0.1256	0.124314	0.123049	0.121803	0.120578	0.119374	0.11819	0.117029	0.115888	0.11477	0.113673	0.112598	0.111545	0.14376	0.14272	0.141703	0.140708	0.139734	0.138782	0.137852	0.136943	0.136056	0.13519	0.134345	0.133521	0.132717	0.131934	0.131171	0.130428	0.129705	0.129001	0.128316	0.12765	0.127003	0.126375	0.125764	0.125172	0.124597	0.124039	0.123499	0.122975	0.122468	0.121977
1	209	3	0.334109	0.335152	0.334534	0.33554	0.336524	0.337486	0.338425	0.33934	0.34023	0.341094	0.341933	0.342745	0.343529	0.344286	0.345014	0.345714	0.346384	0.347024	0.347634	0.348213	0.348762	0.34928	0.349766	0.350221	0.350644	0.351035	0.351395	0.351722	0.352018	0.352281	0.352513	0.352712	0.35288	0.353017	0.353122	0.353195	0.353238	0.35325	0.353232	0.353184	0.353106	0.352999	0.352863	0.352699	0.352507	0.352288	0.352042
2	209	75	0.0262835	0.0239062	0.0215491	0.0192118	0.0168939	0.014595	0.04556	0.0432676	0.0409931	0.0387361	0.0364962	0.034273	0.0320661	0.0298752	0.0276999	0.0255399	0.0233946	0.021264	0.0191475	0.0170448	0.0149556	0.0128796	0.0108164	0.00876578	0.00672736	0.00470084	0.00268592	0.000682311	-0.0029507	-0.0049293	-0.00689747	-0.00885549	-0.0108036	-0.0127421	0.0185738	0.0498685	0.0478965	0.0459331	0.0439781	0.0420313	0.0400923	0.038161	0.0362372	0.0343206	0.0324111	0.0305083	0.0286122
3	209	76	0.113736	0.117123	0.120471	0.123779	0.127046	0.130272	0.133456	0.136598	0.139696	0.142751	0.145761	0.148726	0.151645	0.154518	0.157344	0.160123	0.162854	0.165536	0.16817	0.170753	0.173287	0.17577	0.178202	0.180582	0.182911	0.185186	0.187409	0.189578	0.191693	0.193753	0.195759	0.197709	0.199603	0.20144	0.203221	0.204945	0.206611	0.208219	0.209768	0.211258	0.212689	0.21406	0.215371	0.216622	0.217811	0.21894	0.220006
4	209	138	-0.661515	-0.658731	-0.655948	-0.653166	-0.650382	-0.647598	-0.644813	-0.642026	-0.639237	-0.636446	-0.633653	-0.630856	-0.628057	-0.625255	-0.622449	-0.619639	-0.616826	-0.615649	-0.612825	-0.609997	-0.607165	-0.604329	-0.601489	-0.598646	-0.595798	-0.592947	-0.590092	-0.587234	-0.584373	-0.581508	-0.578641	-0.577411	-0.574535	-0.571657	-0.568777	-0.565895	-0.563011	-0.560126	-0.558881	-0.555991	-0.554742	-0.551849	-0.548956	-0.546064	-0.543173	-0.540284	-0.537396
5	209	157	-0.195007	-0.198496	-0.201977	-0.205449	-0.208912	-0.212363	-0.215803	-0.219229	-0.189396	-0.192823	-0.196235	-0.199628	-0.203003	-0.206359	-0.209694	-0.213007	-0.216297	-0.219564	-0.222805	-0.226021	-0.22921	-0.232371	-0.235503	-0.238605	-0.241677	-0.246357	-0.249361	-0.252332	-0.255269	-0.25817	-0.261036	-0.263866	-0.266658	-0.269412	-0.272128	-0.274805	-0.277441	-0.280037	-0.282593	-0.285106	-0.287578	-0.290006	-0.292392	-0.294735	-0.297034	-0.299288	-0.301498
0	210	0	0.137243	0.13612	0.134995	0.133866	0.132733	0.131596	0.130454	0.129306	0.128153	0.126994	0.125829	0.124658	0.122103	0.13535	0.134144	0.132932	0.131713	0.130487	0.129254	0.128015	0.126769	0.125517	0.124259	0.122995	0.121726	0.120451	0.119172	0.117889	0.116601	0.115311	0.114017	0.112721	0.111424	0.110125	0.108826	0.107526	0.106227	0.10493	0.11944	0.118129	0.116822	0.115518	0.114219	0.112925	0.111637	0.110355	0.109081
1	210	3	0.271522	0.27021	0.268885	0.267549	0.266202	0.263466	0.262097	0.276523	0.275115	0.273695	0.272265	0.270825	0.269373	0.267912	0.266441	0.264959	0.263467	0.261966	0.260455	0.258934	0.257404	0.255864	0.254315	0.252757	0.266995	0.2654	0.263796	0.262183	0.260561	0.258931	0.257291	0.255642	0.253985	0.25232	0.250645	0.248963	0.245895	0.244198	0.242493	0.24078	0.239059	0.23733	0.235594	0.23385	0.232099	0.23034	0.228575
2	210	75	-0.202644	-0.201703	-0.200759	-0.199813	-0.198865	-0.197914	-0.196961	-0.196006	-0.195049	-0.194089	-0.193127	-0.192162	-0.191195	-0.190226	-0.189255	-0.188281	-0.187306	-0.186329	-0.185349	-0.185745	-0.18476	-0.183774	-0.182786	-0.181796	-0.180806	-0.179815	-0.178822	-0.179205	-0.178209	-0.177212	-0.176215	-0.175217	-0.174219	-0.173221	-0.172223	-0.171226	-0.170228	-0.169231	-0.168234	-0.167238	-0.166242	-0.165248	-0.164254	-0.164637	-0.147837	-0.146862	-0.145888
3	210	76	1.25919	1.25455	1.24988	1.24518	1.24045	1.2357	1.23091	1.2261	1.22127	1.2164	1.21151	1.20522	1.20028	1.19394	1.18896	1.18395	1.17891	1.18966	1.18456	1.17944	1.1743	1.16913	1.16395	1.15874	1.15351	1.14827	1.143	1.13772	1.13242	1.1271	1.12177	1.11642	1.11106	1.10568	1.10028	1.09488	1.08946	1.08403	1.07859	1.07314	1.06767	1.0622	1.05673	1.05124	1.04575	1.04026	1.03475
4	210	138	-0.0826589	-0.085941	-0.0892468	-0.0925752	-0.0959249	-0.0992948	-0.102684	-0.10609	-0.109513	-0.11295	-0.116401	-0.121241	-0.124713	-0.128194	-0.131683	-0.135178	-0.138678	-0.142182	-0.145688	-0.149195	-0.1527	-0.156204	-0.159703	-0.163197	-0.166685	-0.170164	-0.173633	-0.177092	-0.180538	-0.18397	-0.187387	-0.192164	-0.195544	-0.198905	-0.202245	-0.205564	-0.20886	-0.212131	-0.215378	-0.219974	-0.223164	-0.226326	-0.229457	-0.232558	-0.235627	-0.238664	-0.243043
5	210	157	-0.540619	-0.534773	-0.528951	-0.523155	-0.517384	-0.511641	-0.505925	-0.500238	-0.49458	-0.49033	-0.484731	-0.479165	-0.473632	-0.468133	-0.462668	-0.45724	-0.451848	-0.446494	-0.441179	-0.435903	-0.430667	-0.425473	-0.420322	-0.415213	-0.410149	-0.406507	-0.401531	-0.396602	-0.393098	-0.388264	-0.383479	-0.378744	-0.37406	-0.369429	-0.36485	-0.360325	-0.355854	-0.351438	-0.347078	-0.342774	-0.338527	-0.334339	-0.330209	-0.326138	-0.322126	-0.318175	-0.314285
0	211	0	-0.156101	-0.152496	-0.148925	-0.145387	-0.141882	-0.13841	-0.134971	-0.131566	-0.128194	-0.124855	-0.12155	-0.118278	-0.115039	-0.111833	-0.10866	-0.10552	-0.102412	-0.0993375	-0.0962986	-0.0932883	-0.09031	-0.0873633	-0.0844482	-0.0815642	-0.078711	-0.0758884	-0.073096	-0.0703335	-0.0676005	-0.0649001	-0.0622248	-0.0595779	-0.0569588	-0.0543671	-0.0518024	-0.0492642	-0.0467519	-0.0442687	-0.0418069	-0.0393696	-0.0369563	-0.0345664	-0.0321995	-0.0298548	-0.027532	-0.0252305	-0.0229497
1	211	3	0.211107	0.209113	0.207063	0.204957	0.202796	0.20058	0.198309	0.195984	0.193604	0.19117	0.188684	0.186144	0.183553	0.18091	0.178216	0.175473	0.17268	0.169839	0.166946	0.164011	0.16103	0.158004	0.154935	0.151823	0.148669	0.145475	0.142242	0.138971	0.135662	0.132318	0.128939	0.125527	0.122083	0.118608	0.115103	0.11157	0.10801	0.104424	0.100811	0.0971772	0.0935219	0.0898461	0.0861509	0.0824379	0.0787081	0.0749629	0.0712036
2	211	75	0.487861	0.48502	0.482202	0.479405	0.47663	0.473875	0.47114	0.468424	0.478808	0.476105	0.47342	0.470751	0.468098	0.465461	0.462835	0.460227	0.457632	0.455051	0.452482	0.449925	0.447379	0.444844	0.44232	0.439805	0.437298	0.434801	0.432311	0.429828	0.427353	0.424883	0.422419	0.41996	0.417501	0.41505	0.412599	0.410154	0.407711	0.405269	0.402826	0.400386	0.397946	0.395505	0.393063	0.39062	0.388174	0.385726	0.383275
3	211	76	-0.828167	-0.824207	-0.82022	-0.816208	-0.812168	-0.8081	-0.804004	-0.79988	-0.795727	-0.791544	-0.787333	-0.783091	-0.77882	-0.774519	-0.770188	-0.765828	-0.761437	-0.757018	-0.752569	-0.748092	-0.743585	-0.739051	-0.734489	-0.7299	-0.725284	-0.720646	-0.715979	-0.711288	-0.706573	-0.701835	-0.697075	-0.692293	-0.687491	-0.68267	-0.677831	-0.672974	-0.668101	-0.663213	-0.658311	-0.653395	-0.648467	-0.643529	-0.63858	-0.633623	-0.628658	-0.623687	-0.61871
4	211	138	0.138741	0.136914	0.135118	0.133354	0.13162	0.129917	0.128243	0.126599	0.124984	0.123398	0.121841	0.120313	0.118812	0.117339	0.115893	0.114474	0.113081	0.111715	0.110375	0.109061	0.107772	0.106507	0.105268	0.104053	0.102862	0.101695	0.100551	0.0994307	0.0983332	0.0972584	0.0962061	0.095176	0.0941678	0.0931814	0.0922165	0.091273	0.0903505	0.089449	0.0885683	0.0877081	0.0868684	0.0860489	0.0852495	0.0844701	0.0837104	0.0829705	0.0822501
5	211	157	-0.47008	-0.468211	-0.466329	-0.464435	-0.462529	-0.46061	-0.45868	-0.456738	-0.454786	-0.452823	-0.450849	-0.448866	-0.446873	-0.44487	-0.442859	-0.440838	-0.43881	-0.436773	-0.434728	-0.432676	-0.430617	-0.428551	-0.426478	-0.424398	-0.422313	-0.420221	-0.418124	-0.416022	-0.413914	-0.411801	-0.409683	-0.407561	-0.405434	-0.403303	-0.401167	-0.399028	-0.396885	-0.394738	-0.392587	-0.390433	-0.388275	-0.386114	-0.38395	-0.381782	-0.379611	-0.377437	-0.375259
0	212	0	-0.742492	-0.737438	-0.73238	-0.727317	-0.722249	-0.717176	-0.7121	-0.70702	-0.701937	-0.696851	-0.691763	-0.686673	-0.681581	-0.676489	-0.671395	-0.666302	-0.661209	-0.656117	-0.651026	-0.645937	-0.64085	-0.635766	-0.630685	-0.625608	-0.620535	-0.615466	-0.610403	-0.605346	-0.600295	-0.595251	-0.590213	-0.585184	-0.580162	-0.575149	-0.570145	-0.56515	-0.560166	-0.555191	-0.550227	-0.545275	-0.540334	-0.535404	-0.530487	-0.525582	-0.520691	-0.515812	-0.510947
1	212	3	0.0448559	0.0424464	0.0400635	0.0377072	0.0353776	0.0330747	0.0307984	0.0285488	0.0263257	0.0351303	0.0329389	0.0307737	0.0286347	0.0265215	0.024434	0.022372	0.0203353	0.0183234	0.0163363	0.0143734	0.0124346	0.0105194	0.00862753	0.00675851	0.00491196	0.00308746	0.00128455	-0.000497222	-0.00225833	-0.00399927	-0.00572052	-0.00742262	-0.00910607	-0.0107714	-0.0124192	-0.0140499	-0.0156642	-0.0172625	-0.0188455	-0.0204137	-0.0219676	-0.0235078	-0.025035	-0.0265496	-0.0280522	-0.0295433	-0.0310236
2	212	75	0.724381	0.721595	0.718758	0.71587	0.712932	0.709943	0.706904	0.703815	0.700676	0.697488	0.694251	0.690965	0.68763	0.684248	0.680817	0.67734	0.673816	0.670245	0.666629	0.662967	0.659261	0.65551	0.651716	0.647878	0.643998	0.640076	0.636113	0.632109	0.628065	0.623982	0.61986	0.6157	0.611503	0.607269	0.602998	0.598693	0.594353	0.589979	0.585572	0.581133	0.576661	0.572159	0.567626	0.563064	0.558473	0.553854	0.549208
3	212	76	0.412182	0.41296	0.41373	0.414494	0.41525	0.415997	0.416734	0.417463	0.418181	0.418888	0.419584	0.420269	0.420941	0.421601	0.422247	0.42288	0.423499	0.424104	0.424693	0.425268	0.425827	0.42637	0.426897	0.427407	0.4279	0.428376	0.428835	0.429276	0.429699	0.430104	0.430491	0.430859	0.431208	0.431538	0.43185	0.432142	0.432414	0.432668	0.432901	0.433115	0.43331	0.433484	0.433639	0.433773	0.433888	0.433983	0.434058
4	212	138	-1.15504	-1.15055	-1.14605	-1.14155	-1.13705	-1.13255	-1.12804	-1.12353	-1.11902	-1.11451	-1.11	-1.10549	-1.10097	-1.09646	-1.09195	-1.08744	-1.08294	-1.07843	-1.07393	-1.06942	-1.06492	-1.06042	-1.05593	-1.05143	-1.04694	-1.04245	-1.03796	-1.03347	-1.02899	-1.0245	-1.02002	-1.01554	-1.01106	-1.00659	-1.00211	-0.997635	-0.993161	-0.988686	-0.984212	-0.979738	-0.975262	-0.970786	-0.966309	-0.96183	-0.957349	-0.952866	-0.94838
5	212	157	-0.0770396	-0.0754126	-0.0738147	-0.0722456	-0.0707054	-0.0691939	-0.0677109	-0.0662563	-0.0648299	-0.0634316	-0.0620611	-0.0607183	-0.059403	-0.058115	-0.0568541	-0.05562	-0.0544125	-0.0532314	-0.0520765	-0.0509475	-0.049844	-0.048766	-0.047713	-0.0466849	-0.0456812	-0.0447018	-0.0437463	-0.0428143	-0.0419057	-0.0410199	-0.0401568	-0.039316	-0.038497	-0.0376996	-0.0369235	-0.0361681	-0.0354332	-0.0347184	-0.0340233	-0.0333475	-0.0326906	-0.0320523	-0.0314321	-0.0308295	-0.0302443	-0.029676	-0.0291241
0	213	0	2.36265	2.35397	2.34526	2.33651	2.32773	2.3189	2.31004	2.30114	2.2922	2.28322	2.2742	2.26514	2.25604	2.24691	2.23773	2.22851	2.21926	2.20996	2.20062	2.19125	2.18184	2.17238	2.16289	2.15336	2.14378	2.13417	2.12452	2.11484	2.10511	2.09535	2.08555	2.07571	2.06584	2.05592	2.04598	2.03599	2.02598	2.01592	2.00584	1.99571	1.98556	1.97538	1.96516	1.95491	1.94463	1.93432	1.92398
1	213	3	-0.00186477	0.00385559	0.00954385	0.0151987	0.0208189	0.0264031	0.0319501	0.0374588	0.0429278	0.048356	0.0537422	0.0590853	0.0643842	0.0696378	0.0748451	0.0800049	0.0851163	0.0901782	0.0951898	0.10015	0.105058	0.109913	0.114714	0.119461	0.124152	0.128787	0.133365	0.137885	0.142348	0.146751	0.151096	0.15538	0.159604	0.163768	0.16787	0.171911	0.17589	0.179807	0.183661	0.187453	0.191183	0.19485	0.198453	0.201994	0.205472	0.208887	0.21224
2	213	75	-1.02172	-1.01938	-1.017	-1.01457	-1.0121	-1.00957	-1.007	-1.00439	-1.00173	-0.999023	-0.996275	-0.993483	-0.990648	-0.987771	-0.984852	-0.981892	-0.978891	-0.97585	-0.972769	-0.96965	-0.966492	-0.963297	-0.960065	-0.956797	-0.953493	-0.950155	-0.946782	-0.943375	-0.939936	-0.936465	-0.88997	-0.886484	-0.882968	-0.879424	-0.875851	-0.87225	-0.868623	-0.86497	-0.861292	-0.857589	-0.853863	-0.850115	-0.846344	-0.842553	-0.838741	-0.83491	-0.831061
3	213	76	-0.893376	-0.894055	-0.894704	-0.895326	-0.895921	-0.896489	-0.897031	-0.897549	-0.898043	-0.898514	-0.898962	-0.899389	-0.899795	-0.900182	-0.900548	-0.900897	-0.901228	-0.901542	-0.901839	-0.902121	-0.902389	-0.902643	-0.902883	-0.903111	-0.903327	-0.903533	-0.903728	-0.903913	-0.90409	-0.904258	-0.904419	-0.904574	-0.904722	-0.904865	-0.905003	-0.905138	-0.905269	-0.905397	-0.905524	-0.905649	-0.905773	-0.905896	-0.906021	-0.906146	-0.906272	-0.906401	-0.906532
4	213	138	1.14517	1.14454	1.1439	1.14326	1.14261	1.14196	1.1413	1.14064	1.13997	1.13929	1.13859	1.13789	1.13718	1.17945	1.17866	1.17786	1.17704	1.17621	1.17536	1.17449	1.17361	1.17271	1.17178	1.17084	1.16987	1.16888	1.16787	1.20983	1.20873	1.2076	1.20645	1.20528	1.20408	1.20285	1.2016	1.20032	1.19901	1.19768	1.19632	1.19494	1.19353	1.19209	1.19062	1.18913	1.18761	1.18606	1.18449
5	213	157	-1.31207	-1.30051	-1.28895	-1.27739	-1.26582	-1.25425	-1.24268	-1.23111	-1.21954	-1.20796	-1.19639	-1.18481	-1.17324	-1.16166	-1.15009	-1.13852	-1.12696	-1.1154	-1.10384	-1.09229	-1.08074	-1.06921	-1.05768	-1.04615	-1.03464	-1.02314	-1.01165	-1.00017	-0.988702	-0.977249	-0.965811	-0.954389	-0.942983	-0.931594	-0.920224	-0.908873	-0.897542	-0.886232	-0.874944	-0.863679	-0.852438	-0.841221	-0.83003	-0.818865	-0.807728	-0.796618	-0.785537
0	214	0	-0.299786	-0.300131	-0.300432	-0.300691	-0.300907	-0.301079	-0.301209	-0.301297	-0.301341	-0.301343	-0.301303	-0.301221	-0.301096	-0.30093	-0.300723	-0.300475	-0.300185	-0.299856	-0.299486	-0.299076	-0.298628	-0.29814	-0.297614	-0.29705	-0.296449	-0.29581	-0.295136	-0.294425	-0.293679	-0.292899	-0.292084	-0.291236	-0.290355	-0.289443	-0.288498	-0.287523	-0.286518	-0.285483	-0.284419	-0.283327	-0.282208	-0.281062	-0.27989	-0.278692	-0.277468	-0.276221	-0.27495
1	214	3	0.362157	0.362821	0.363472	0.364107	0.364728	0.365335	0.365927	0.366504	0.367065	0.367612	0.368143	0.368658	0.369158	0.369642	0.37011	0.370561	0.370996	0.371414	0.371816	0.3722	0.372567	0.372917	0.373249	0.373564	0.37386	0.374138	0.374397	0.374638	0.37486	0.375063	0.375246	0.37541	0.375553	0.375677	0.37578	0.375862	0.375923	0.375963	0.375982	0.375978	0.375952	0.375905	0.375834	0.375739	0.375621	0.375479	0.375312
2	214	75	-0.377618	-0.377777	-0.37794	-0.378106	-0.378274	-0.378445	-0.378619	-0.378794	-0.378971	-0.379149	-0.379329	-0.379509	-0.379691	-0.379872	-0.380054	-0.380236	-0.380418	-0.380599	-0.380779	-0.380958	-0.381136	-0.381313	-0.381487	-0.38166	-0.38183	-0.381998	-0.382164	-0.382326	-0.382485	-0.382642	-0.382794	-0.382943	-0.383088	-0.383229	-0.383365	-0.383497	-0.383623	-0.383745	-0.383862	-0.383973	-0.384079	-0.384179	-0.384272	-0.384359	-0.38444	-0.384514	-0.384581
3	214	76	0.393687	0.393074	0.392462	0.391852	0.391245	0.390641	0.390039	0.389441	0.388847	0.388257	0.387672	0.387091	0.386516	0.385946	0.385382	0.384824	0.384272	0.383727	0.383189	0.382658	0.382135	0.381619	0.381111	0.380612	0.38012	0.379638	0.379164	0.378699	0.378243	0.377797	0.377361	0.376933	0.376515	0.376107	0.375709	0.37532	0.374942	0.374573	0.374214	0.373865	0.373526	0.373196	0.372876	0.372565	0.372264	0.371971	0.371688
4	214	138	0.01559	0.0107727	0.00599124	0.00124603	-0.00346274	-0.00813484	-0.0127701	-0.0173683	-0.0219293	-0.0264519	-0.0309382	-0.035387	-0.0397982	-0.0441719	-0.0485079	-0.0528064	-0.0570675	-0.0612911	-0.0654774	-0.0696264	-0.0737385	-0.0778137	-0.0818522	-0.0858543	-0.0898203	-0.0937503	-0.0976446	-0.101504	-0.105328	-0.109117	-0.112872	-0.116593	-0.120281	-0.123935	-0.127557	-0.131146	-0.134704	-0.13823	-0.141725	-0.145189	-0.148623	-0.152027	-0.155402	-0.158748	-0.162065	-0.165353	-0.168615
5	214	157	0.330659	0.329935	0.329197	0.328445	0.32768	0.326903	0.326115	0.325317	0.324509	0.323691	0.322866	0.322034	0.321195	0.320351	0.319502	0.318649	0.317794	0.316937	0.316079	0.315221	0.314364	0.31351	0.312658	0.31181	0.310967	0.31013	0.3093	0.308477	0.307663	0.306859	0.306065	0.305281	0.30451	0.303752	0.303008	0.302278	0.301564	0.300866	0.300184	0.29952	0.298874	0.298247	0.29764	0.297053	0.296486	0.29594	0.295417
0	215	0	-0.900139	-0.89792	-0.895665	-0.893375	-0.89105	-0.888688	-0.88629	-0.883855	-0.881383	-0.878875	-0.876329	-0.873745	-0.871124	-0.868465	-0.865767	-0.863032	-0.860257	-0.857444	-0.854592	-0.8517	-0.848769	-0.845799	-0.842788	-0.839738	-0.836648	-0.833517	-0.830346	-0.827134	-0.823881	-0.820588	-0.817254	-0.813878	-0.810461	-0.807003	-0.803504	-0.799963	-0.79638	-0.792757	-0.789091	-0.785385	-0.781637	-0.777851	-0.77402	-0.770148	-0.766236	-0.762282	-0.758288
1	215	3	0.042305	0.0433103	0.044282	0.0452197	0.0461234	0.0469928	0.0478279	0.0486283	0.0493941	0.0501251	0.0508212	0.0514823	0.0521082	0.052699	0.0532513	0.0537716	0.0542567	0.0547065	0.055121	0.0555004	0.0558447	0.056154	0.0564284	0.0566681	0.0568733	0.0570441	0.0571808	0.0572836	0.0573529	0.0573889	0.057392	0.0573624	0.0573007	0.0572072	0.0570824	0.0569267	0.0567405	0.0565244	0.0562789	0.0560045	0.0557018	0.0553713	0.0550137	0.0546295	0.0542193	0.0537839	0.0533237
2	215	75	-0.184063	-0.18117	-0.178251	-0.175308	-0.17234	-0.169346	-0.166327	-0.163281	-0.160209	-0.157111	-0.153985	-0.150833	-0.147653	-0.144445	-0.141212	-0.137947	-0.134653	-0.13133	-0.127978	-0.124596	-0.121183	-0.11774	-0.114265	-0.110759	-0.107222	-0.103652	-0.10005	-0.0964149	-0.0927466	-0.0890447	-0.0853088	-0.0815387	-0.0777339	-0.0738941	-0.0700191	-0.0661083	-0.0621617	-0.0581787	-0.0541592	-0.0501027	-0.0460091	-0.0418781	-0.0377093	-0.0335025	-0.0292574	-0.0249738	-0.0206515
3	215	76	-0.371597	-0.375368	-0.37913	-0.382881	-0.38662	-0.390348	-0.394063	-0.397764	-0.401451	-0.405123	-0.408779	-0.412418	-0.416039	-0.419642	-0.423225	-0.426787	-0.430328	-0.433847	-0.437342	-0.440813	-0.444259	-0.447681	-0.451073	-0.454436	-0.45777	-0.461074	-0.464346	-0.467586	-0.470793	-0.473965	-0.477102	-0.480203	-0.483266	-0.486291	-0.489277	-0.492223	-0.495127	-0.49799	-0.50081	-0.503586	-0.506318	-0.509004	-0.511645	-0.514238	-0.516784	-0.519282	-0.521731
4	215	138	-0.149162	-0.150607	-0.15203	-0.153429	-0.154805	-0.156158	-0.157489	-0.158797	-0.160083	-0.161347	-0.162588	-0.163808	-0.165007	-0.166183	-0.167339	-0.168473	-0.169585	-0.170677	-0.171748	-0.172798	-0.173827	-0.174835	-0.175823	-0.17679	-0.177737	-0.178663	-0.179569	-0.180455	-0.181321	-0.182167	-0.182992	-0.183798	-0.184584	-0.18535	-0.186097	-0.186824	-0.187531	-0.188222	-0.188891	-0.18954	-0.19017	-0.190781	-0.191373	-0.191947	-0.192501	-0.193037	-0.193554
5	215	157	-0.447907	-0.448021	-0.448131	-0.448236	-0.448335	-0.448427	-0.448512	-0.448588	-0.448655	-0.448713	-0.448759	-0.448794	-0.448816	-0.448824	-0.448818	-0.448797	-0.448759	-0.448703	-0.44863	-0.448536	-0.448422	-0.448287	-0.44813	-0.447948	-0.447743	-0.447512	-0.447255	-0.44697	-0.446658	-0.446316	-0.445948	-0.417857	-0.417466	-0.417042	-0.416584	-0.416093	-0.415567	-0.415006	-0.414409	-0.413775	-0.413104	-0.412395	-0.411648	-0.410862	-0.410037	-0.409173	-0.40827
0	216	0	-0.0344324	-0.0319087	-0.0293994	-0.0269044	-0.024424	-0.0219583	-0.0195075	-0.0170715	-0.0146507	-0.0122451	-0.00985484	-0.00748008	-0.00512094	-0.00277758	-0.000450131	0.00186127	0.00415646	0.00643531	0.00869766	0.0109433	0.0131722	0.0153841	0.0175788	0.0197562	0.021916	0.0240581	0.0261822	0.0282881	0.0303756	0.0457111	0.0477486	0.049767	0.0517659	0.0537449	0.0557039	0.070909	0.0728144	0.0746986	0.0765613	0.0916688	0.093475	0.0952585	0.0970189	0.0987557	0.100469	0.102157	0.10382
1	216	3	-0.013433	-0.0142467	-0.0150475	-0.0158344	-0.0166069	-0.017364	-0.0181054	-0.0188302	-0.019538	-0.0202282	-0.0209005	-0.0215544	-0.0221895	-0.0228056	-0.0234024	-0.0239797	-0.0245373	-0.0250752	-0.0255932	-0.0260914	-0.0265698	-0.0270284	-0.0274674	-0.027887	-0.0282874	-0.0286688	-0.0290316	-0.029376	-0.0297024	-0.0300113	-0.0303031	-0.0305782	-0.0308373	-0.0310807	-0.0313092	-0.0315234	-0.0317238	-0.0319111	-0.0320861	-0.0322494	-0.0324017	-0.0325439	-0.0326767	-0.0328009	-0.0329173	-0.0330267	-0.03313
2	216	75	-0.455178	-0.453307	-0.45146	-0.449635	-0.447833	-0.446051	-0.44429	-0.442547	-0.440823	-0.439115	-0.437423	-0.435746	-0.434082	-0.432431	-0.430791	-0.429162	-0.427541	-0.425929	-0.424324	-0.422725	-0.421131	-0.41954	-0.417952	-0.416365	-0.414779	-0.413192	-0.411603	-0.410011	-0.408416	-0.406816	-0.40521	-0.403597	-0.401976	-0.400346	-0.398707	-0.397057	-0.395395	-0.393721	-0.392034	-0.390333	-0.388617	-0.386885	-0.385137	-0.383373	-0.38159	-0.379789	-0.377969
3	216	76	0.570745	0.567676	0.564601	0.56152	0.558433	0.555341	0.552243	0.54914	0.546033	0.542921	0.539806	0.536686	0.533562	0.530435	0.527305	0.524172	0.521036	0.517898	0.514758	0.511616	0.508472	0.505326	0.502179	0.499031	0.495882	0.492732	0.489581	0.48643	0.483279	0.480128	0.476976	0.473825	0.470674	0.467523	0.464372	0.461222	0.458073	0.454924	0.451777	0.44863	0.445483	0.442338	0.439194	0.436051	0.432909	0.429768	0.426628
4	216	138	0.326791	0.325453	0.324087	0.322694	0.321273	0.319826	0.318354	0.316856	0.315334	0.313787	0.312218	0.310625	0.309011	0.307375	0.305717	0.30404	0.302343	0.300626	0.298891	0.297137	0.295366	0.293579	0.291774	0.289955	0.288119	0.286269	0.284405	0.282528	0.280637	0.278734	0.276819	0.274892	0.272954	0.271006	0.269047	0.267079	0.265102	0.263116	0.261122	0.25912	0.257111	0.255095	0.253072	0.251043	0.249009	0.246969	0.244924
5	216	157	0.656903	0.654283	0.651652	0.649009	0.646355	0.64369	0.641015	0.638328	0.635631	0.632924	0.630207	0.62748	0.624744	0.621998	0.619243	0.616479	0.613706	0.610924	0.608134	0.605335	0.602529	0.599714	0.596891	0.594061	0.591224	0.588379	0.585527	0.582668	0.579802	0.576929	0.57405	0.571165	0.568273	0.565376	0.562472	0.559563	0.556648	0.553727	0.550801	0.54787	0.544933	0.541992	0.539045	0.536094	0.533138	0.530177	0.527212
0	217	0	0.167529	0.164169	0.160809	0.157449	0.15409	0.150731	0.147372	0.144014	0.140657	0.137301	0.133946	0.130592	0.127239	0.123888	0.120538	0.117191	0.113845	0.110502	0.107161	0.103822	0.100487	0.0971545	0.0938254	0.0904997	0.0871778	0.0838598	0.0805461	0.0772368	0.0739322	0.0706326	0.0673382	0.0640493	0.0607662	0.0574892	0.0542185	0.0509546	0.0476976	0.044448	0.041206	0.037972	0.0347463	0.0315293	0.0283214	0.0251077	0.0219192	0.0187409	0.0155734
1	217	3	0.228769	0.222342	0.215936	0.209554	0.203195	0.196862	0.190554	0.184274	0.178023	0.171801	0.16561	0.159452	0.153326	0.147235	0.14118	0.135162	0.129182	0.123241	0.11734	0.111482	0.105666	0.0998938	0.0942172	0.0885368	0.0829039	0.0773196	0.0717851	0.0663014	0.0608697	0.0554909	0.0501661	0.0448962	0.0396824	0.0345254	0.0294262	0.0243704	0.0193895	0.0144688	0.00960927	0.00481146	7.60903e-05	-0.00459622	-0.00920489	-0.0137494	-0.0182292	-0.0226439	-0.0269931
2	217	75	-0.20124	-0.20135	-0.201419	-0.201544	-0.201676	-0.201813	-0.201957	-0.202105	-0.202259	-0.202416	-0.202478	-0.202643	-0.202812	-0.202983	-0.203156	-0.203332	-0.203509	-0.203688	-0.203868	-0.204048	-0.20423	-0.204412	-0.204594	-0.204777	-0.20496	-0.205142	-0.205325	-0.205508	-0.205691	-0.205875	-0.206058	-0.206242	-0.206426	-0.206611	-0.206797	-0.206984	-0.207173	-0.207379	-0.207571	-0.207766	-0.207964	-0.208165	-0.20837	-0.20858	-0.208794	-0.209013	-0.209238
3	217	76	1.245	1.24062	1.23626	1.23193	1.22762	1.22334	1.21909	1.21486	1.21067	1.2065	1.20236	1.19825	1.19416	1.19011	1.18609	1.1821	1.17813	1.1742	1.1703	1.16643	1.16258	1.15877	1.15499	1.15123	1.14751	1.14382	1.14015	1.13651	1.1329	1.12932	1.12576	1.12223	1.11873	1.11525	1.1118	1.10837	1.10497	1.10159	1.09823	1.09489	1.09157	1.08828	1.085	1.08174	1.0785	1.07528	1.07207
4	217	138	0.240976	0.2368	0.232702	0.228581	0.224488	0.220423	0.216387	0.212381	0.208389	0.204442	0.200526	0.19664	0.192786	0.188963	0.185171	0.181412	0.177685	0.173991	0.170329	0.166701	0.163155	0.159593	0.156065	0.152571	0.14911	0.145734	0.142341	0.138983	0.13566	0.132371	0.129116	0.125896	0.122711	0.11956	0.116444	0.113362	0.110314	0.107301	0.104322	0.101377	0.0984661	0.0955887	0.0927448	0.0899341	0.0871564	0.0844115	0.081699
5	217	157	-0.723921	-0.726037	-0.728138	-0.730223	-0.732291	-0.734343	-0.736378	-0.738397	-0.740398	-0.742381	-0.744347	-0.746294	-0.748223	-0.750133	-0.752024	-0.753894	-0.755745	-0.757575	-0.759384	-0.761171	-0.762937	-0.76468	-0.766401	-0.768097	-0.76977	-0.771419	-0.773043	-0.774641	-0.776213	-0.777758	-0.779277	-0.780767	-0.78223	-0.783664	-0.785068	-0.786442	-0.787786	-0.789099	-0.79038	-0.791629	-0.792845	-0.794027	-0.795176	-0.79629	-0.79737	-0.798413	-0.79942
0	218	0	-0.52058	-0.51726	-0.51392	-0.510559	-0.507178	-0.503778	-0.500359	-0.496922	-0.493467	-0.489994	-0.486505	-0.482999	-0.479478	-0.475942	-0.472392	-0.468828	-0.465251	-0.461662	-0.458062	-0.454452	-0.450831	-0.447202	-0.443564	-0.439919	-0.436268	-0.432611	-0.42895	-0.425284	-0.421616	-0.417946	-0.414275	-0.410603	-0.406933	-0.403264	-0.399598	-0.395935	-0.392277	-0.388624	-0.384978	-0.381339	-0.377708	-0.374086	-0.370475	-0.366875	-0.363287	-0.359712	-0.356151
1	218	3	-0.353353	-0.35353	-0.353662	-0.353746	-0.353784	-0.353774	-0.353716	-0.353611	-0.353457	-0.353254	-0.353003	-0.352703	-0.352355	-0.351957	-0.35151	-0.351013	-0.350468	-0.349874	-0.34923	-0.348538	-0.347797	-0.347007	-0.346169	-0.345284	-0.34435	-0.34337	-0.342342	-0.341268	-0.340148	-0.338983	-0.337773	-0.336519	-0.335222	-0.333881	-0.332499	-0.331075	-0.32961	-0.328106	-0.326563	-0.324981	-0.323363	-0.321708	-0.320018	-0.318293	-0.316534	-0.314743	-0.31292
2	218	75	0.234359	0.230218	0.226113	0.222044	0.21801	0.214011	0.210047	0.232716	0.228789	0.224897	0.221038	0.217213	0.21342	0.209659	0.20593	0.202232	0.198566	0.194929	0.191322	0.187744	0.184195	0.180674	0.17718	0.173712	0.170271	0.166855	0.163464	0.160096	0.156753	0.153431	0.150132	0.146855	0.143598	0.140361	0.137143	0.133945	0.130764	0.1276	0.124453	0.121322	0.118206	0.115104	0.112017	0.108942	0.10588	0.102829	0.0997901
3	218	76	-0.839283	-0.840002	-0.84069	-0.841346	-0.841968	-0.842557	-0.843112	-0.84363	-0.844113	-0.844558	-0.844965	-0.845334	-0.845662	-0.845951	-0.846199	-0.846405	-0.846569	-0.846689	-0.846766	-0.846799	-0.846787	-0.84673	-0.846626	-0.846476	-0.846278	-0.846033	-0.84574	-0.845399	-0.845008	-0.844567	-0.844077	-0.843536	-0.842944	-0.842302	-0.841607	-0.840861	-0.840062	-0.839211	-0.838307	-0.83735	-0.83634	-0.835275	-0.834157	-0.832985	-0.831758	-0.830477	-0.829141
4	218	138	0.00567681	0.00549939	0.00533719	0.00518951	0.00505564	0.00493484	0.0048264	0.00472959	0.00464365	0.00456786	0.00450146	0.00444369	0.00439379	0.00435098	0.00431448	0.00428351	0.00425726	0.00423495	0.00421577	0.0041989	0.00418354	0.00416888	0.0041541	0.0041384	0.00412095	0.00410096	0.00407762	0.00405013	0.00401772	0.00397959	0.00393499	0.00388316	0.00382335	0.00375485	0.00367695	0.00358896	0.00349021	0.00338005	0.00325786	0.00312305	0.00297503	0.00281326	0.0026372	0.00244636	0.00224027	0.00201847	0.00178056
5	218	157	-0.466425	-0.465912	-0.465379	-0.464826	-0.464252	-0.463656	-0.463039	-0.462399	-0.461737	-0.461051	-0.460342	-0.45961	-0.458854	-0.458073	-0.457269	-0.456441	-0.455589	-0.454712	-0.453812	-0.452887	-0.451939	-0.450967	-0.449972	-0.448953	-0.447912	-0.446848	-0.445762	-0.444655	-0.443526	-0.442376	-0.441206	-0.440015	-0.438806	-0.437578	-0.436332	-0.435069	-0.433789	-0.432493	-0.431183	-0.429857	-0.428518	-0.427167	-0.425803	-0.424429	-0.423044	-0.42165	-0.420248
0	219	0	-0.0870231	-0.0864652	-0.0858601	-0.0852085	-0.0845112	-0.0837689	-0.0829824	-0.0821526	-0.0812803	-0.0803665	-0.0794121	-0.0784181	-0.0773855	-0.0763152	-0.0752085	-0.0740662	-0.0728895	-0.0716796	-0.0704374	-0.0691643	-0.0678612	-0.0665295	-0.0668827	-0.0654943	-0.0640808	-0.0626435	-0.0611835	-0.0597022	-0.0582008	-0.0566806	-0.0551428	-0.0535888	-0.0520198	-0.0504372	-0.0488423	-0.0472363	-0.0456207	-0.0439966	-0.0423656	-0.0407287	-0.0390875	-0.0374433	-0.0357973	-0.0341508	-0.0325053	-0.030862	-0.0292222
1	219	3	-1.07514	-1.06606	-1.05697	-1.04788	-1.03879	-1.02968	-1.02058	-1.01147	-1.00235	-0.993223	-0.984094	-0.974958	-0.965817	-0.95667	-0.947517	-0.938357	-0.929191	-0.920019	-0.91084	-0.901655	-0.892462	-0.883263	-0.874056	-0.864842	-0.85562	-0.84639	-0.837153	-0.827908	-0.818654	-0.809392	-0.800121	-0.790842	-0.781553	-0.772255	-0.76466	-0.75534	-0.74601	-0.736671	-0.72732	-0.717002	-0.707633	-0.698252	-0.688861	-0.679458	-0.670043	-0.660615	-0.651176
2	219	75	0.469009	0.46721	0.465374	0.4635	0.46159	0.459644	0.457663	0.455649	0.453602	0.451522	0.449412	0.447271	0.445101	0.441191	0.438969	0.436721	0.434448	0.432151	0.429832	0.42749	0.425129	0.422748	0.420349	0.417933	0.415501	0.413055	0.410595	0.408122	0.405639	0.403146	0.400644	0.398135	0.395619	0.393098	0.390573	0.388046	0.385516	0.382986	0.380456	0.377928	0.375403	0.372881	0.370364	0.367852	0.365347	0.36285	0.360361
3	219	76	0.948234	0.943392	0.938518	0.93361	0.928671	0.9237	0.918697	0.913663	0.908598	0.903502	0.898376	0.893221	0.888035	0.881109	0.875869	0.870601	0.865306	0.859984	0.854636	0.849262	0.843863	0.83844	0.832994	0.827524	0.82032	0.81481	0.80928	0.802017	0.796451	0.790867	0.785266	0.779649	0.774016	0.768369	0.762708	0.757035	0.751351	0.745656	0.739952	0.734239	0.728518	0.722792	0.717059	0.711323	0.705583	0.69984	0.694097
4	219	138	-0.42792	-0.426574	-0.425154	-0.42366	-0.422094	-0.420456	-0.418746	-0.416967	-0.415119	-0.413203	-0.411219	-0.40917	-0.407055	-0.404876	-0.401677	-0.399376	-0.397015	-0.394594	-0.392115	-0.389579	-0.386987	-0.384341	-0.381641	-0.37889	-0.376087	-0.373235	-0.370335	-0.367387	-0.364394	-0.361356	-0.358275	-0.355151	-0.351987	-0.348784	-0.345542	-0.342263	-0.338948	-0.335598	-0.332215	-0.3288	-0.325354	-0.321878	-0.318373	-0.314841	-0.311282	-0.307699	-0.304091
5	219	157	-0.861282	-0.857383	-0.853422	-0.849401	-0.845318	-0.841175	-0.83697	-0.832705	-0.828379	-0.823992	-0.819544	-0.815036	-0.810467	-0.805838	-0.801149	-0.798112	-0.7933	-0.788429	-0.783498	-0.778509	-0.77346	-0.768353	-0.763188	-0.757964	-0.752683	-0.747345	-0.741949	-0.736497	-0.730988	-0.725424	-0.719804	-0.714128	-0.708398	-0.702613	-0.696774	-0.690882	-0.684936	-0.678937	-0.672886	-0.666783	-0.660628	-0.654422	-0.648165	-0.641858	-0.635501	-0.629095	-0.622639
0	220	0	-0.049131	-0.0471706	-0.045227	-0.0433008	-0.0413925	-0.0394988	-0.0376276	-0.0357756	-0.0339432	-0.0321307	-0.0303385	-0.0285668	-0.026816	-0.0250862	-0.0233777	-0.0216907	-0.0200253	-0.0183817	-0.0167599	-0.0151601	-0.0135822	-0.0120262	-0.0104885	-0.00897625	-0.00748577	-0.00601687	-0.00456937	-0.00314306	-0.00173768	-0.000352961	0.00101144	0.00235588	0.00368076	0.00498652	0.00627364	0.00754262	0.00879401	0.0100284	0.0112464	0.0124487	0.013636	0.0148089	0.0159683	0.0171149	0.0182496	0.0193731	0.0204864
1	220	3	0.0922314	0.0944293	0.0965721	0.0986596	0.100692	0.102668	0.104592	0.106457	0.108265	0.110022	0.111718	0.113358	0.114942	0.116469	0.11794	0.119355	0.120714	0.122016	0.123262	0.124452	0.125586	0.126665	0.127688	0.128655	0.129566	0.130423	0.131225	0.131972	0.132664	0.133302	0.133886	0.134416	0.134893	0.135317	0.135688	0.136007	0.136274	0.136489	0.136652	0.136769	0.136831	0.136844	0.136807	0.136721	0.136586	0.136403	0.136172
2	220	75	-0.315476	-0.317944	-0.320395	-0.32283	-0.325248	-0.32765	-0.330036	-0.332406	-0.334761	-0.3371	-0.339424	-0.341733	-0.344027	-0.346307	-0.348573	-0.350825	-0.353063	-0.33048	-0.332728	-0.334963	-0.337186	-0.339397	-0.341596	-0.343784	-0.345961	-0.348126	-0.350282	-0.352426	-0.354561	-0.356687	-0.358802	-0.360909	-0.363006	-0.365095	-0.367175	-0.369247	-0.371311	-0.373366	-0.375414	-0.377454	-0.379486	-0.38151	-0.383527	-0.385537	-0.387539	-0.389533	-0.39152
3	220	76	0.693102	0.6941	0.695078	0.696039	0.696984	0.697913	0.698827	0.699727	0.700615	0.701492	0.702357	0.703214	0.704061	0.704901	0.705734	0.706565	0.707387	0.708205	0.70902	0.709832	0.710643	0.711453	0.712263	0.713073	0.713885	0.714699	0.715515	0.716334	0.71716	0.717987	0.718818	0.719654	0.720496	0.721343	0.722195	0.723054	0.723919	0.72479	0.725668	0.726552	0.727443	0.72834	0.729243	0.730152	0.731067	0.731988	0.732915
4	220	138	-1.37572	-1.37099	-1.36626	-1.36151	-1.35676	-1.35199	-1.34721	-1.34243	-1.33763	-1.33282	-1.32801	-1.32319	-1.31837	-1.31354	-1.3087	-1.30386	-1.29902	-1.29417	-1.28931	-1.28446	-1.2796	-1.27475	-1.26989	-1.26503	-1.26017	-1.25531	-1.25045	-1.2456	-1.24074	-1.23589	-1.23104	-1.22619	-1.22135	-1.21651	-1.21167	-1.20684	-1.20202	-1.1972	-1.19238	-1.18757	-1.18277	-1.17797	-1.17318	-1.1684	-1.16362	-1.15885	-1.15409
5	220	157	0.31152	0.334685	0.332978	0.331245	0.329485	0.327698	0.325885	0.324046	0.322181	0.32029	0.318377	0.316434	0.314467	0.312474	0.310457	0.308415	0.306348	0.304258	0.302148	0.300011	0.29785	0.295667	0.293465	0.291238	0.288989	0.286719	0.284428	0.282117	0.279786	0.277436	0.275067	0.272679	0.270274	0.267851	0.265411	0.262955	0.260483	0.257995	0.255493	0.252976	0.250446	0.247902	0.245346	0.242777	0.240197	0.237606	0.235004
[truncated: 3,453 more columns]

## Sheet: panels A & B trials
	subject	trial_num	r	g	b	RT	ITI	pupil_stim_locked_t1	pupil_stim_locked_t2	pupil_baseline_stim_locked
0	206	0	75	124	89	0.538013	3.85	0.365021	-3.48936	10.0868
1	206	1	138	154	91	0.377461	5.31	-9.65564	-12.7306	7.53197
2	206	2	0	168	107	0.39093	4.03	-17.5558	-1.02128	8.06403
3	206	3	76	154	68	0.410537	5.1	-25.0558	-30.5218	17.9832
4	206	4	157	193	131	0.335077	4.12	-21.5862	-10.7585	2.64282
5	206	5	76	154	68	0.378687	3.96	2.49846	6.08545	-10.7054
6	206	6	138	154	91	0.314287	4.13	-10.3432	-11.4044	4.11523
7	206	7	76	154	68	0.349891	3.64	-2.58654	-0.566507	2.42336
8	206	8	0	168	107	0.327562	5.22	-8.84988	-6.16659	1.45496
9	206	9	76	154	68	0.335047	4.38	-1.48141	3.01972	3.00041
10	206	10	0	168	107	0.35163	5.4	-17.48	-5.28681	8.04091
11	206	11	75	124	89	0.377016	3.9	-0.849025	-2.87475	3.59332
12	206	12	76	154	68	0.43258	4.15	-9.54592	-2.58042	3.68505
13	206	13	0	168	107	0.342308	3.8	-16.0643	-15.6658	2.6312
14	206	14	0	168	107	0.369826	4.52	2.56425	4.86005	-7.23127
15	206	15	3	121	112	0.363378	4.35	0.723758	-2.22385	5.92139
16	206	16	75	124	89	0.391938	4.52	-5.69543	-5.21621	7.66051
17	206	17	0	168	107	0.341542	4.72	-9.92556	0.177298	4.61293
18	206	18	3	121	112	0.605117	3.98	2.91766	-11.6653	6.89539
19	206	19	138	154	91	0.414581	4.54	1.9925	-4.97575	-1.54707
20	206	20	138	154	91	0.358171	5.44	6.28814	1.57019	-7.52718
21	206	21	157	193	131	0.346624	3.92	-15.6887	1.83671	4.35005
22	206	22	3	121	112	0.364348	5.32	-0.735276	7.39634	-0.127269
23	206	23	138	154	91	0.347786	4.58	-5.06515	-1.14128	3.42929
24	206	24	157	193	131	0.401353	3.94	-12.5332	-2.14995	-1.75381
25	206	25	75	124	89	0.396967	4.38	1.64879	5.39431	-1.83969
26	206	26	3	121	112	0.354573	3.53	2.91721	1.3899	-0.106945
27	206	27	3	121	112	0.367255	5.5	1.15644	0.829929	0.0781329
28	206	28	75	124	89	0.354634	3.76	-3.75424	1.3167	2.81855
29	206	29	0	168	107	0.442203	4.31	-13.9511	3.31928	1.20849
30	206	30	3	121	112	0.399786	4.75	2.15515	8.02006	-0.293888
31	206	31	3	121	112	0.377406	4.11	4.4116	0.722378	-0.968237
32	206	32	138	154	91	0.358909	4.23	-6.69968	1.40048	2.75894
33	206	33	0	168	107	0.355525	4.04	-19.3693	-2.46517	0.981381
34	206	34	0	168	107	0.347058	4.57	-12.7872	-8.50772	3.88427
35	206	35	76	154	68	0.358626	4.23	-4.31016	2.14732	3.76994
36	206	36	76	154	68	0.440192	4.97	-4.98289	0.115002	-5.64561
37	206	37	75	124	89	0.465681	4.8	-0.0433398	1.0018	0.794881
38	206	38	138	154	91	0.368258	3.87	-2.86095	-3.81983	-0.0969907
39	206	39	76	154	68	0.351984	3.76	-1.49017	5.44319	2.33258
40	206	40	75	124	89	0.381474	5.37	7.95058	-1.3795	-3.36438
41	206	41	157	193	131	0.359035	3.93	-12.6789	-5.01733	4.00346
42	206	42	157	193	131	0.35662	4.33	-2.82729	11.9521	-7.48369
43	206	43	157	193	131	0.368189	5.37	-16.5957	-2.5754	4.16794
44	206	44	138	154	91	0.358696	4.7	2.54107	5.15397	-2.37054
45	206	45	76	154	68	0.370193	4.25	2.68587	6.18256	-2.56891
46	206	46	157	193	131	0.353739	3.71	-7.44654	4.77749	3.03923
47	206	47	75	124	89	0.407407	3.65	-3.65147	-9.40062	9.05486
48	206	48	157	193	131	0.448945	4.94	-20.5956	-10.197	8.38467
49	206	49	3	121	112	0.40648	4.44	-1.20429	1.83834	3.48089
50	206	50	76	154	68	0.469048	4.94	-3.19934	-1.74525	1.67276
51	206	51	0	168	107	0.358557	3.95	-3.6625	-13.623	2.28523
52	206	52	3	121	112	0.346178	5.16	1.20863	-7.34122	4.64958
53	206	53	76	154	68	0.369678	3.55	-4.8996	-4.65859	2.04285
54	206	54	157	193	131	0.481316	4.64	-9.83137	-3.07005	-2.14465
55	206	55	76	154	68	0.343925	4.25	-3.57503	-1.57674	0.817225
56	206	56	75	124	89	0.347593	3.87	2.34282	5.68728	-0.131674
57	206	57	157	193	131	0.341124	5.49	-6.99228	-2.90406	-4.69336
58	206	58	138	154	91	0.372619	4.94	4.56539	7.95495	-17.148
59	206	59	138	154	91	0.354124	3.59	-6.51054	-2.78028	-1.39466
60	206	60	0	168	107	0.453686	4.87	-8.75979	1.3531	3.53596
61	206	61	76	154	68	0.374278	4.36	-9.01216	-5.67324	15.7836
62	206	62	75	124	89	0.425778	4.25	3.3017	4.47119	-1.00006
63	206	63	138	154	91	0.413329	4.98	-3.41627	-0.842774	7.6544
64	206	64	75	124	89	0.364813	4.1	0.364182	3.40646	0.923379
65	206	65	75	124	89	0.398542	5.43	2.08242	3.24908	-0.0492632
66	206	66	0	168	107	0.389932	4.66	-4.59799	2.52601	-1.34351
67	206	67	76	154	68	0.354486	5.22	-6.1975	0.656868	-0.439382
68	206	68	157	193	131	0.461973	5.42	-10.9936	-3.11973	-2.61266
69	206	69	75	124	89	0.405443	5.3	-1.62371	1.67502	-0.705039
70	206	70	76	154	68	0.430984	3.94	3.9646	6.67134	-3.87062
71	206	71	3	121	112	0.412585	4.51	6.7331	1.27415	-1.1218
72	206	72	76	154	68	0.489135	4.94	-4.49289	-0.479518	4.33683
73	206	73	75	124	89	0.362714	5.06	-1.17133	-5.05899	1.15202
74	206	74	138	154	91	0.414276	4.29	5.88858	5.94853	-7.47042
75	206	75	138	154	91	0.313801	5.38	-5.12121	2.6117	5.34763
76	206	76	157	193	131	0.373267	4.01	-17.6079	-6.99158	3.8172
77	206	77	76	154	68	0.343834	3.86	1.96857	-2.49404	-1.77586
78	206	78	0	168	107	0.385485	4.15	-9.02892	-18.4309	1.28003
79	206	79	3	121	112	0.429037	4.2	-1.05276	-8.56731	2.20076
80	206	80	75	124	89	0.338614	3.51	-0.668726	-11.4156	1.50333
81	206	81	138	154	91	0.384235	5.34	2.3245	-2.42203	-0.456498
82	206	82	3	121	112	0.359724	4.07	-1.04763	-6.01332	7.13799
83	206	83	3	121	112	0.360303	4.1	6.61713	6.93376	1.05711
84	206	84	0	168	107	0.349956	4.95	-7.44915	-9.01268	1.42268
85	206	85	75	124	89	0.353417	5.39	4.91361	-5.82128	-0.31966
86	206	86	157	193	131	0.352951	4.17	-4.76217	-0.8195	-3.34788
87	206	87	138	154	91	0.446508	4.47	-0.434563	1.16804	2.80182
88	206	88	157	193	131	0.540113	5.17	-21.8876	-10.0577	-0.074158
89	206	89	0	168	107	0.370675	4.83	-13.7112	-5.11398	6.46944
90	206	90	0	168	107	0.4882	5.13	-12.1198	-6.49783	15.6344
91	206	91	3	121	112	0.359666	5.07	-4.53083	-17.8522	9.421
92	206	92	0	168	107	0.393142	4.13	-4.48363	0.564796	-5.26569
93	206	93	138	154	91	0.360738	3.68	-19.0397	-3.9296	2.15691
94	206	94	3	121	112	0.403363	3.73	6.50315	2.76252	-4.2959
95	206	95	157	193	131	0.384941	3.79	-9.76106	7.17349	-0.0907643
96	206	96	3	121	112	0.346525	5.49	4.89815	-3.01851	1.33096
97	206	97	3	121	112	0.338058	5.33	3.91466	6.21396	1.81058
98	206	98	138	154	91	0.369546	4.51	-8.45528	-3.52856	7.74865
99	206	99	138	154	91	0.379095	5.41	-5.6213	-4.5828	1.94085
100	206	100	75	124	89	0.419581	4.9	2.3297	7.88675	-6.58462
101	206	101	3	121	112	0.491064	3.93	1.91833	2.90086	-8.34908
102	206	102	3	121	112	0.446665	4.54	1.86979	10.2833	-5.45742
103	206	103	157	193	131	0.402237	3.58	0.30042	0.21755	1.38633
104	206	104	76	154	68	0.375911	4.78	-8.17527	7.52339	-0.670431
105	206	105	75	124	89	0.474476	3.85	-0.509585	1.45943	5.31407
106	206	106	0	168	107	0.444084	5.49	-7.8972	4.04007	4.63382
107	206	107	157	193	131	0.319528	4.84	-11.0203	0.238962	6.52853
108	206	108	76	154	68	0.371089	5.37	2.17564	3.29183	1.24191
109	206	109	0	168	107	0.366556	4.26	-15.2341	1.7475	8.3402
110	206	110	75	124	89	0.366116	4.86	7.0996	-1.1423	-4.24675
111	206	111	157	193	131	0.460569	5.25	-11.3504	-5.79285	-3.04939
112	206	112	157	193	131	0.37809	5.13	-19.1758	-12.8184	-1.99989
113	206	113	0	168	107	0.37166	5.49	2.72677	12.2272	-23.1649
114	206	114	157	193	131	0.337106	4.87	-7.63034	7.66123	-0.78406
115	206	115	3	121	112	0.484693	4.59	-2.22772	7.31525	9.47643
116	206	116	138	154	91	0.485179	5.05	-2.70839	-1.67755	14.21
117	206	117	75	124	89	0.382717	4.61	-2.77346	-15.4339	6.86864
118	206	118	138	154	91	0.352303	4.49	-7.29417	1.60525	-6.55563
119	206	119	76	154	68	0.327856	4.7	-19.6591	-9.95162	5.22524
0	207	0	3	121	112		3.62	1.21085	-16.0917	4.57285
1	207	1	76	154	68	0.444269	4.49	7.52772	25.3966	-6.85361
2	207	2	0	168	107	0.431777	4.4	-0.732803	11.8849	-8.26286
3	207	3	3	121	112	0.469358	3.81	0.226058	1.13578	-8.68356
4	207	4	138	154	91	0.451977	3.97	0.1992	0.275995	-7.34583
5	207	5	0	168	107	0.45757	4.92	-13.7333	-19.0496	-5.31843
6	207	6	75	124	89		5.27	7.81283	21.9538	-7.9191
7	207	7	75	124	89		4.51	3.86008	-29.9948	36.9718
8	207	8	0	168	107	0.442216	5.14	-5.70833	-1.92782	-1.4674
9	207	9	75	124	89	0.422688	4.69	5.16023	-10.2886	7.64082
10	207	10	3	121	112	0.394292	4.78	13.6362	18.8669	-4.80777
11	207	11	3	121	112	0.389855	4.5	12.4927	-2.7155	-0.506239
12	207	12	75	124	89	0.44345	4.69	9.20708	-8.13905	-8.23848
13	207	13	0	168	107	0.467053	3.99	3.83506	25.8868	-20.6652
14	207	14	138	154	91		4.18	-2.03183	-1.99981	13.2617
15	207	15	75	124	89		3.72	28.1433	36.4628	-30.4649
16	207	16	3	121	112	0.488813	3.56	4.87034	23.003	-15.4736
17	207	17	3	121	112		4.22	-18.6633	-15.2282	-3.38753
18	207	18	157	193	131	0.476073	5.37	-10.2366	13.6509	-16.7171
19	207	19	3	121	112		4.54	-0.262668	-22.3227	-0.32558
20	207	20	76	154	68		3.81	-3.47347	22.3364	6.46472
21	207	21	76	154	68	0.489729	4.49	-0.153605	-12.7507	30.7825
22	207	22	0	168	107	0.465294	4.22	-3.61895	9.61497	12.8509
23	207	23	75	124	89	0.476865	3.79	-0.442666	-9.62808	26.0236
24	207	24	75	124	89		5.22	-21.1996	-36.3869	11.7476
25	207	25	3	121	112		3.82	-1.83729	14.0365	-25.9982
26	207	26	157	193	131	0.479648	5.12	-7.20528	9.70489	5.72193
27	207	27	138	154	91	0.474227	3.58	-6.64832	8.02573	-7.51334
28	207	28	0	168	107		4.31	-15.4738	-8.75048	11.7469
29	207	29	138	154	91	0.483381	5.48	0.528602	2.76296	-22.9217
30	207	30	157	193	131		4.84	-14.0861	1.8776	-11.6338
31	207	31	76	154	68	0.436478	5.19	-18.1381	21.6307	0.637607
32	207	32	157	193	131	0.462044	5.35	-10.1995	5.96606	11.1384
33	207	33	157	193	131	0.394543	3.54	-1.207	16.9883	-2.93547
34	207	34	0	168	107	0.456177	3.96	-14.3324	-14.3171	14.1224
35	207	35	157	193	131		3.65	-7.50351	17.0918	8.29806
36	207	36	76	154	68	0.461408	4.71	-14.6616	-10.3846	15.525
37	207	37	76	154	68		4.54	-6.72391	14.6419	1.57437
38	207	38	157	193	131	0.40851	4.25	-29.2952	-32.1874	11.7756
39	207	39	75	124	89	0.469053	4.69	13.3495	1.12978	-14.4919
40	207	40	138	154	91		5.48	2.38705	4.62744	-26.4945
41	207	41	76	154	68	0.478128	5.03	6.19323	39.7465	-19.9794
42	207	42	76	154	68		3.58	-10.5698	-4.40629	29.0781
43	207	43	75	124	89	0.435288	5.09	-2.64159	-1.49574	6.85119
44	207	44	138	154	91	0.434789	4.7	-1.39968	-11.7452	1.13837
45	207	45	138	154	91	0.449365	4.89	-4.57135	-8.4235	11.2531
46	207	46	0	168	107		5.2	-16.2607	3.298	18.3582
47	207	47	76	154	68		4.83	3.67387	0.949207	-9.3065
48	207	48	76	154	68	0.47392	3.85	-9.9808	2.82203	-25.8389
49	207	49	75	124	89	0.417694	3.86	-17.9127	-17.8515	10.2992
50	207	50	138	154	91	0.406432	4.1	-7.65004	-0.0883182	-24.9511
51	207	51	3	121	112	0.461909	4.65	7.50192	42.5835	-33.245
52	207	52	0	168	107	0.423453	3.66	-20.2383	-12.4169	42.0181
53	207	53	138	154	91	0.370037	5.29	-2.79098	-26.2226	23.4318
54	207	54	3	121	112	0.377572	3.54	0.707645	16.3629	11.8937
55	207	55	138	154	91	0.42318	4.69	-13.0967	-25.1761	31.1282
56	207	56	76	154	68	0.467767	5.07	-3.55938	-11.0979	18.163
57	207	57	138	154	91	0.437285	4.87	-12.7653	-17.9417	1.686
58	207	58	76	154	68	0.43279	4.15	-8.02379	1.36467	-0.816141
59	207	59	157	193	131	0.442356	4.67	-3.83029	-9.209	4.58691
60	207	60	0	168	107	0.473929	5.37	-13.1799	-9.25719	-6.43295
61	207	61	76	154	68		4.6	-12.8418	-14.0909	-1.12315
62	207	62	75	124	89	0.476008	4.54	-8.97753	-22.0172	-1.23508
63	207	63	76	154	68		5.21	5.51472	14.2776	-44.8832
64	207	64	76	154	68	0.423168	4.84	-15.2483	4.02241	-5.54017
65	207	65	157	193	131		3.52	-2.25314	21.6424	43.4917
66	207	66	0	168	107	0.482382	5.17	-15.8991	-22.1997	26.5421
67	207	67	3	121	112	0.447865	3.69	3.77301	3.7703	-13.3435
68	207	68	3	121	112	0.454541	5.21	-1.15737	-8.1889	26.6806
69	207	69	76	154	68	0.436067	4.14	-10.127	-1.82107	17.2018
70	207	70	0	168	107	0.421625	4.11	-5.24614	16.0187	-8.75288
71	207	71	157	193	131	0.385276	4.17	-0.0883801	18.3222	-21.8436
72	207	72	76	154	68		3.57	-1.44032	5.80993	-4.3943
73	207	73	3	121	112		4.86	-5.41711	-6.77922	7.53814
74	207	74	76	154	68		4.31	-3.47079	12.656	-15.5199
75	207	75	0	168	107	0.446563	4.97	-11.3346	-6.24886	-5.70969
76	207	76	0	168	107	0.428123	3.59	-5.24705	42.5344	-38.7623
77	207	77	157	193	131	0.477723	4.01	-4.18527	-5.10642	25.9547
78	207	78	75	124	89	0.423307	3.79	-3.47365	-10.608	9.50902
79	207	79	0	168	107	0.446954	3.57	-8.92723	3.79476	-7.59164
80	207	80	76	154	68	0.441605	4.28	6.30312	38.5758	2.62892
81	207	81	157	193	131	0.407212	5.19	-8.13489	-3.02444	18.1614
82	207	82	157	193	131		4.47	3.69069	8.28332	-2.67625
83	207	83	75	124	89	0.408316	4.36	16.1608	9.62625	-25.9469
84	207	84	75	124	89	0.389882	4.84	-10.5486	-11.4845	-21.9228
85	207	85	138	154	91	0.431522	3.87	1.26481	23.3475	-33.8251
86	207	86	75	124	89		4.88	24.3151	46.5548	0.954286
87	207	87	138	154	91	0.427632	4.53	13.7206	-0.251413	5.60319
88	207	88	157	193	131	0.415197	3.55	-22.6946	-4.05278	22.5534
89	207	89	75	124	89	0.412854	5.13	2.86525	-15.2887	20.0039
90	207	90	157	193	131	0.442343	4.1	-11.8474	23.6488	-21.3809
91	207	91	75	124	89		4.34	0.345875	-19.4855	7.20577
92	207	92	157	193	131	0.394494	5.39	16.7622	39.1534	-1.04483
93	207	93	138	154	91	0.409955	4.15	-9.69837	-40.5497	26.1813
94	207	94	138	154	91	0.427599	3.76	-4.44292	-12.1509	-6.52364
95	207	95	75	124	89		4.09	-3.59013	-5.11256	-12.0261
96	207	96	3	121	112	0.418786	5.11	23.9785	-1.31357	-14.918
97	207	97	138	154	91	0.226343	3.77	15.011	21.3977	-22.8958
98	207	98	157	193	131		5.48	-9.51322	-23.3919	-4.85772
99	207	99	0	168	107	0.480456	5.36	2.28954	53.9451	-36.8197
100	207	100	138	154	91	0.418009	4.06	-2.45561	-4.82802	30.8723
101	207	101	3	121	112	0.409578	4.57	8.69791	-1.08132	15.4642
102	207	102	3	121	112	0.471203	5.26	3.1876	4.19695	14.0865
103	207	103	0	168	107	0.393749	3.99	-11.2515	-1.00847	-4.03174
104	207	104	75	124	89	0.399328	4.55	5.91331	-8.37453	-5.50404
105	207	105	3	121	112	0.42284	5.18	0.406771	2.9047	-20.4856
106	207	106	138	154	91	0.438336	5.11	2.8267	-1.15568	-14.1693
107	207	107	0	168	107	0.449954	5.26	-7.29907	48.5352	-45.2405
108	207	108	138	154	91	0.451398	4.47	-10.4914	-1.51239	32.0859
109	207	109	76	154	68		3.91	-11.4147	8.0869	17.019
110	207	110	3	121	112	0.341556	4.86	8.81285	7.37818	10.0901
111	207	111	3	121	112		5.06	-9.83506	-10.2636	2.9766
112	207	112	138	154	91	0.412642	4.66	-8.96859	-18.8161	-7.82022
113	207	113	157	193	131	0.416184	4.35	-14.5518	-2.67598	10.8046
114	207	114	75	124	89	0.443767	3.92	-11.3038	-25.1547	-5.92331
115	207	115	157	193	131	0.420384	4.2	7.50858	56.8769	-33.048
116	207	116	3	121	112	0.389961	5.42	-2.71132	-10.2482	19.0759
117	207	117	0	168	107		3.81	-1.9676	19.7329	-23.918
118	207	118	157	193	131	0.441155	4.3	5.34622	19.6631	-9.14118
119	207	119	0	168	107		4.11	-29.7431	-42.819	37.4731
0	208	0	157	193	131	0.578973	3.54	-10.36	-13.6758	11.0405
1	208	1	157	193	131	0.49347	5.22	3.06963	3.62591	-12.5819
2	208	2	3	121	112	0.518965	4.19	6.19543	4.26455	-4.40119
3	208	3	3	121	112	0.492707	4.61	-2.97867	-12.2747	-0.155579
4	208	4	75	124	89	0.554172	3.84	0.450457	2.11096	-10.608
5	208	5	3	121	112	0.503715	4.18	0.119514	-2.79938	-1.47685
6	208	6	157	193	131	0.636249	4.79	-0.890065	1.49109	-0.762659
7	208	7	0	168	107	0.571789	3.62	-6.87639	10.0513	-8.60383
8	208	8	138	154	91	0.665469	3.96	-10.7335	8.17708	14.3114
9	208	9	157	193	131	0.649045	3.71	-5.86447	0.608194	4.47556
10	208	10	75	124	89	0.45666	3.96	-1.66403	7.06652	-3.80947
11	208	11	138	154	91	0.533258	4.99	-3.49009	4.31179	-2.97701
12	208	12	157	193	131	0.598807	4.96	7.26165	9.99336	8.3019
13	208	13	75	124	89	0.532295	3.62	0.634517	-12.2278	14.5182
14	208	14	76	154	68	0.699945	5.49	-7.3043	-11.9152	0.598288
15	208	15	138	154	91	0.463373	3.73	-0.913432	-3.10946	-4.97371
16	208	16	3	121	112	0.497027	4.32	-1.77559	-4.93369	-5.95735
17	208	17	0	168	107	0.493589	3.85	-0.906472	11.5888	-6.15331
18	208	18	157	193	131	0.469219	4.34	-1.89918	-2.16419	-2.36845
19	208	19	138	154	91	0.45275	4.11	6.59776	7.34161	-4.00815
20	208	20	157	193	131	0.428307	5.21	-6.05575	9.30312	-5.72707
21	208	21	157	193	131	0.519675	3.76	-7.16074	-9.68333	-0.31852
22	208	22	157	193	131	0.644351	3.85	-8.67264	-10.0563	-0.598764
23	208	23	75	124	89	0.548047	5	3.18397	10.7672	-2.67737
24	208	24	0	168	107	0.473547	4	-6.92391	4.60801	14.8323
25	208	25	76	154	68	0.453171	3.93	0.563675	7.82959	10.4005
26	208	26	3	121	112	0.664756	4.22	1.84362	1.26601	-10.4916
27	208	27	76	154	68	0.563309	5.46	-11.8789	-7.67971	9.55449
28	208	28	3	121	112	0.488786	3.69	-10.7115	10.5523	-2.92474
29	208	29	157	193	131	0.546373	5.21	-7.82244	-8.62394	0.104759
30	208	30	76	154	68	0.609915	4.59	5.62291	21.6668	-14.4247
31	208	31	75	124	89	0.405484	5.3	-16.673	-10.8662	9.08928
32	208	32	0	168	107	0.421891	3.9	-14.0718	7.71578	-2.001
33	208	33	75	124	89	0.407519	5.22	-1.38998	-1.82493	-2.54413
34	208	34	76	154	68	0.599015	4.54	3.80699	11.9378	5.43769
35	208	35	3	121	112	0.474527	4.33	4.67824	-5.63782	-2.18137
36	208	36	138	154	91	0.510163	5.49	3.73383	4.93502	-15.4685
37	208	37	0	168	107	0.464693	4.13	-8.59453	-5.00399	-5.08751
38	208	38	3	121	112	0.502238	4.91	-5.09388	21.7839	-11.3884
39	208	39	76	154	68	0.475733	4.71	-8.20965	-10.7274	21.5631
40	208	40	3	121	112	0.699225	5.04	-8.3668	7.71862	0.980547
41	208	41	0	168	107	0.466845	5.3	-9.4688	-6.42726	7.99877
42	208	42	76	154	68	0.509375	5.36	-9.66785	-1.40575	3.91792
43	208	43	138	154	91	0.49086	4.98	-11.8775	1.15289	10.1319
44	208	44	75	124	89	0.442315	3.64	8.49922	13.6288	-9.16084
45	208	45	75	124	89	0.431974	5.01	-7.85225	2.12952	-1.47713
46	208	46	76	154	68	0.499438	3.63	5.1283	19.2759	-13.0606
47	208	47	157	193	131		5.04	-7.85451	-6.45217	0.928291
48	208	48	138	154	91	0.49563	3.85	6.30798	13.7208	-9.50735
49	208	49	75	124	89	0.43328	3.52	-13.4206	-15.4286	5.31428
50	208	50	76	154	68	0.456796	5.27	8.75958	25.2939	-15.7659
51	208	51	3	121	112	0.402372	3.59	-9.60973	-13.8067	6.44521
52	208	52	138	154	91	0.446023	4.25	-13.8003	9.38335	-3.22854
53	208	53	75	124	89	0.466646	3.95	-5.73605	2.36423	-0.0892606
54	208	54	75	124	89	0.644209	4.17	11.068	8.42504	-0.513794
55	208	55	157	193	131	0.485764	4.35	-17.919	-4.40227	10.8329
56	208	56	76	154	68	0.433363	5.14	-9.21856	-1.97187	1.96985
57	208	57	3	121	112	0.484833	4.4	-2.92534	0.194236	5.90738
58	208	58	157	193	131	0.397461	3.54	1.39695	1.24646	-4.49192
59	208	59	138	154	91	0.521029	5.29	4.60177	1.39256	3.27826
60	208	60	3	121	112	0.454525	5.49	-5.61923	-4.43306	4.04497
61	208	61	0	168	107	0.416068	3.62	-10.3559	-14.0818	6.52826
62	208	62	3	121	112	0.547639	4.7	2.58999	12.4725	-7.62973
63	208	63	3	121	112	0.624232	3.97	1.07632	-3.69315	0.426914
64	208	64	0	168	107	0.45388	4.8	3.31671	8.43455	-16.1067
65	208	65	157	193	131	0.54344	3.54	-1.3665	19.1481	-5.52385
66	208	66	138	154	91	0.595026	5.13	-9.60463	3.31381	0.829713
67	208	67	157	193	131	0.480537	5.14	-11.972	0.735145	4.97573
68	208	68	0	168	107	0.484102	3.71	0.33202	20.8363	-6.41309
69	208	69	3	121	112	0.442615	3.53	4.66781	8.47545	5.00915
70	208	70	157	193	131	0.444289	4.84	-15.5811	-5.03584	13.0995
71	208	71	75	124	89	0.453748	3.88	-9.88084	-1.37951	15.6194
72	208	72	138	154	91	0.461437	5.48	-15.8454	-1.74818	8.38047
73	208	73	75	124	89	0.442895	4.98	-7.32759	1.45286	-5.03406
74	208	74	76	154	68	0.411451	3.61	-10.2052	-1.67344	-7.6315
75	208	75	0	168	107	0.455091	4.71	-1.59327	-2.69945	-10.2242
76	208	76	3	121	112	0.376702	5.01	-0.845333	4.02396	-8.51423
77	208	77	75	124	89	0.384191	4.11	-10.147	1.05674	2.05037
78	208	78	0	168	107	0.451807	4.63	-18.9524	-1.74675	12.8872
79	208	79	138	154	91	0.518302	3.98	-2.76592	-1.80018	41.2102
80	208	80	75	124	89	0.403928	4.9	-19.3845	-24.1363	11.5331
81	208	81	76	154	68	0.431453	4.48	-1.67988	1.8492	-12.3995
82	208	82	138	154	91	0.468948	5.1	-9.18144	6.31269	-17.8439
83	208	83	0	168	107	0.464595	3.56	-11.4035	0.0811937	3.7159
84	208	84	138	154	91	0.440119	3.79	-5.90857	4.24693	-1.50258
85	208	85	3	121	112	0.590773	4.41	-9.87894	12.5422	0.619824
86	208	86	0	168	107	0.486311	5.23	-19.5928	-7.4068	15.5758
87	208	87	75	124	89	0.419921	3.55	-4.38254	-1.07174	12.4908
88	208	88	0	168	107	0.481524	3.73	-13.1358	-9.09979	5.35214
89	208	89	76	154	68	0.459148	4.4	-8.27841	-3.41726	-7.54851
90	208	90	76	154	68	0.511792	5.24	-6.91297	-10.7906	-7.617
91	208	91	75	124	89	0.423217	4.53	5.08966	21.2418	-10.9487
92	208	92	0	168	107	0.376755	4.58	-14.3979	-9.18465	9.74908
93	208	93	75	124	89	0.464311	5.36	1.09372	-0.0372885	4.67416
94	208	94	76	154	68	0.407779	4.44	-24.0961	-18.4617	16.2584
95	208	95	76	154	68	0.683325	4.73	-2.97975	-21.9893	7.04831
96	208	96	0	168	107	0.459892	3.69	-12.9233	3.0944	-3.96103
97	208	97	3	121	112	0.449457	4.49	4.03847	0.438818	-2.91667
98	208	98	3	121	112	0.561035	5.16	4.15239	2.0872	-7.41353
99	208	99	0	168	107	0.434573	5.19	-2.81809	14.6464	-11.2078
100	208	100	157	193	131	0.428134	4.74	-12.6381	11.5978	-4.54314
101	208	101	138	154	91	0.428687	4.91	-10.4969	-8.45674	18.1969
102	208	102	75	124	89	0.400229	3.72	-9.75756	-7.82469	9.03038
103	208	103	138	154	91	0.483869	3.69	-3.91557	12.3831	-9.65612
104	208	104	76	154	68	0.505347	3.94	-4.57814	0.50991	2.836
105	208	105	138	154	91	0.476957	4.95	-5.78689	6.04242	-1.21814
106	208	106	76	154	68	0.441559	4.43	-7.83365	-2.68536	-3.01233
107	208	107	0	168	107	0.443081	5.42	-7.59545	9.62316	-9.70308
108	208	108	138	154	91	0.582594	5	-4.29265	19.379	-8.69484
109	208	109	75	124	89	0.452118	5.02	3.46239	8.18637	-1.743
110	208	110	157	193	131	0.419649	4.17	-6.73482	-1.50724	-1.31642
111	208	111	138	154	91	0.594219	4.45	-7.74759	-4.5426	-0.149239
112	208	112	157	193	131		4.1	-7.5141	-4.22053	-5.56088
113	208	113	3	121	112	0.571463	3.51	3.27405	15.3836	-11.2366
114	208	114	0	168	107	0.517107	5.38	5.92247	20.8914	-6.85037
115	208	115	0	168	107	0.484573	3.64	-17.4027	-6.39699	10.3574
116	208	116	157	193	131	0.460154	3.65	-8.72977	8.97785	0.82587
117	208	117	76	154	68	0.432707	5.31	-6.83615	4.15713	2.21789
118	208	118	76	154	68	0.464316	4.06	-4.09047	0.515017	1.1897
119	208	119	138	154	91	0.447905	3.74	1.73625	-1.40098	-6.90745
0	209	0	3	121	112	0.748051	4.36	-1.97635	17.7299	6.67836
1	209	1	75	124	89	0.426616	5.18	-3.98808	-11.2658	26.8802
2	209	2	3	121	112	0.714046	4.89	-7.71707	-19.9627	16.4178
3	209	3	0	168	107	0.43161	4.52	-7.92063	-2.48775	-16.2949
4	209	4	138	154	91	0.401175	4.9	-2.16907	1.88593	-10.0051
5	209	5	157	193	131	0.426685	5.47	-3.2454	6.32172	-10.2556
6	209	6	138	154	91	0.415178	4.95	7.08294	9.42677	-4.68677
7	209	7	0	168	107	0.462757	5.11	-10.7525	-11.2163	18.093
8	209	8	75	124	89	0.366254	5.13	-9.88439	-26.4836	13.9791
9	209	9	138	154	91	0.365846	3.83	10.6501	-1.77659	-15.8358
10	209	10	76	154	68	0.419445	5.48	3.92246	2.20433	-15.7795
11	209	11	75	124	89	0.433937	3.73	3.11625	-3.32755	6.57985
12	209	12	75	124	89	0.385536	5.05	-1.23158	12.6354	0.492585
13	209	13	138	154	91	0.430965	3.92	-2.87296	-2.33375	-0.749717
14	209	14	76	154	68	0.522515	5.39	-10.1293	7.18942	4.91814
15	209	15	138	154	91	0.396048	4.85	6.19829	-1.99737	-1.09438
16	209	16	76	154	68	0.446562	4.73	-9.2045	-10.3507	4.30176
17	209	17	157	193	131	0.392105	5.27	-22.1403	-9.19218	20.2409
18	209	18	76	154	68	0.41563	4.13	-6.48964	8.66443	-4.53427
19	209	19	3	121	112	0.435179	4.67	-3.11688	-2.40238	-5.80028
20	209	20	138	154	91	0.472802	5.1	0.747279	-16.0184	-1.34938
21	209	21	138	154	91	0.349381	4.79	16.6458	40.6656	-15.3963
22	209	22	76	154	68	0.414834	4.29	4.51643	13.6316	-3.64816
23	209	23	157	193	131	0.504479	4.11	0.62966	-7.85968	0.359402
24	209	24	76	154	68	0.459986	4.85	10.3498	21.6138	-0.0106328
25	209	25	0	168	107	0.417524	4.82	2.44069	15.3796	19.8
26	209	26	75	124	89	0.412018	3.73	0.145391	-10.0119	-5.16907
27	209	27	75	124	89	0.40571	5.42	5.58961	4.49415	-19.1544
28	209	28	76	154	68	0.395193	3.7	-5.92235	-2.38526	-8.66228
29	209	29	157	193	131	0.474745	5.41	-4.04362	4.66517	-8.61037
30	209	30	3	121	112	0.406236	4.7	0.0182203	3.12373	0.715372
31	209	31	75	124	89	0.438758	3.7	-3.05674	4.22469	-11.8976
32	209	32	75	124	89	0.404393	4.99	4.08714	3.53869	-8.82762
33	209	33	157	193	131	0.409913	3.79	-26.5254	-12.8867	12.7878
34	209	34	75	124	89	0.411619	3.64	14.8206	3.34478	-1.01514
35	209	35	76	154	68	0.433224	5.33	10.1521	22.4892	12.0795
36	209	36	3	121	112	0.420736	5.01	2.49044	15.6849	24.7443
37	209	37	75	124	89	0.387178	3.72	17.2315	-9.31324	12.6339
38	209	38	76	154	68	0.436794	4.54	-1.34568	0.846381	-13.8921
39	209	39	0	168	107	0.464284	3.7	-5.21519	6.30046	-30.0614
40	209	40	75	124	89	0.425908	4.63	7.94324	23.9536	-31.9065
41	209	41	3	121	112	0.403429	4.59	3.98384	-0.861268	-13.3321
42	209	42	75	124	89	0.428958	5.27	21.7158	18.0489	-17.0846
43	209	43	138	154	91	0.45341	4.76	11.3794	-1.17158	1.81274
44	209	44	138	154	91	0.419012	5.09	4.83892	2.53219	-7.30469
45	209	45	75	124	89	0.380516	3.74	0.927032	-4.28834	8.58643
46	209	46	3	121	112	0.456075	4.43	8.67784	0.458591	1.52203
47	209	47	3	121	112	0.405657	5.35	1.63243	-11.274	15.3315
48	209	48	157	193	131	0.438183	4.73	-4.999	-0.70302	18.5905
49	209	49	0	168	107	0.45376	3.88	-29.5321	-6.00363	14.4296
50	209	50	157	193	131	0.451354	4.43	-4.42707	-0.0128222	-8.74032
51	209	51	157	193	131	0.480885	3.55	-7.21381	1.55952	-16.7753
52	209	52	157	193	131	0.542488	5.11	1.74363	18.2623	-7.78031
53	209	53	157	193	131	0.411002	5.19	-1.64131	23.0635	-11.7563
54	209	54	0	168	107	0.42845	5	-12.0265	13.2498	-5.42128
55	209	55	0	168	107	0.405988	4.41	-8.09562	-10.5226	6.6071
56	209	56	157	193	131	0.501481	4.26	-3.52102	-2.77604	-7.10122
57	209	57	138	154	91	0.423117	3.81	11.7185	-0.863345	-0.522819
58	209	58	76	154	68	0.390706	5.06	0.631572	6.66744	-12.7186
59	209	59	75	124	89	0.52122	3.71	18.2488	16.3644	-3.85692
60	209	60	157	193	131	0.47286	4.01	-15.1718	10.218	14.0867
61	209	61	0	168	107	0.372468	4.03	-2.8113	-11.3768	14.8806
62	209	62	138	154	91	0.516048	5.48	2.0861	-9.06052	8.0195
63	209	63	75	124	89	0.43558	3.51	-1.08189	-0.8625	-14.4317
64	209	64	76	154	68	0.508218	4.88	-4.26295	13.8877	-20.0214
65	209	65	3	121	112	0.393766	4.74	-4.16192	9.8265	-2.52861
66	209	66	3	121	112	0.469245	4.91	1.10022	8.8678	21.5801
67	209	67	157	193	131	0.540741	4.17	1.59633	0.610599	-0.428974
68	209	68	3	121	112	0.424349	3.75	4.81435	-6.47202	-8.84267
69	209	69	3	121	112	0.469886	4.29	-1.02094	4.71035	-15.1706
70	209	70	0	168	107	0.470477	4.79	-7.48757	6.2179	-10.3063
71	209	71	0	168	107	0.449983	3.52	1.05682	-11.8205	3.81552
72	209	72	76	154	68	0.475613	4.31	-1.14292	-0.209452	-4.54804
73	209	73	3	121	112	0.403226	3.71	-3.71712	5.57147	2.38053
74	209	74	157	193	131	0.442794	5.27	-1.76941	4.1245	6.67526
75	209	75	3	121	112	0.415273	5.46	-1.08473	-0.128874	14.8828
76	209	76	3	121	112	0.408834	4.29	-3.47496	1.09081	7.08665
77	209	77	138	154	91	0.402351	4.76	-12.8144	-10.0831	-2.14013
78	209	78	3	121	112	0.409944	4.68	4.21408	3.20985	-10.3476
79	209	79	76	154	68	0.517443	4.64	-2.84912	2.7196	-7.00773
80	209	80	0	168	107	0.574007	5.18	-2.32279	9.74261	-3.80476
81	209	81	76	154	68	0.505506	3.92	-3.87544	-4.48151	9.1016
82	209	82	76	154	68	0.539046	4.87	6.2089	14.9735	-11.6587
83	209	83	76	154	68	0.40653	3.87	-6.55914	-2.42633	9.78114
84	209	84	0	168	107	0.502126	3.96	6.41891	8.09829	0.8084
85	209	85	157	193	131	0.531681	4.77	-8.57161	-4.72059	6.85604
86	209	86	3	121	112	0.53226	5.22	-2.54408	-0.730528	-4.72682
87	209	87	138	154	91	0.445752	4.92	-7.05474	1.87815	-3.44603
88	209	88	76	154	68	0.469265	3.95	1.01439	1.25256	3.40305
89	209	89	3	121	112	0.478851	4.6	-18.8287	-2.94886	10.9616
90	209	90	75	124	89	0.508359	4.65	9.05442	9.35236	-11.6242
91	209	91	0	168	107	0.474956	4.16	-12.8838	-4.92254	5.83591
92	209	92	138	154	91	0.494643	4.75	-1.58545	-9.82209	-0.95078
93	209	93	75	124	89	0.510098	4.29	-1.01421	2.97905	-7.44417
94	209	94	157	193	131	0.451744	4.55	9.45837	-0.825255	-7.44117
95	209	95	157	193	131	0.533232	5.33	8.18294	17.2147	-2.70989
96	209	96	0	168	107	0.49074	5.36	-7.821	-17.6056	21.2681
97	209	97	138	154	91	0.465122	3.86	-11.4503	-18.8638	8.45
98	209	98	138	154	91	0.470731	5.4	-15.6374	-17.5877	15.4269
99	209	99	0	168	107	0.428236	4.82	3.92636	-7.45925	-3.12772
100	209	100	0	168	107	0.469803	4.92	3.61374	0.0965122	-4.85268
101	209	101	76	154	68	0.45531	4.37	12.3791	14.4891	-16.6841
102	209	102	3	121	112	0.437845	3.52	-9.68447	-4.78327	12.7538
103	209	103	0	168	107	0.507458	5.11	4.13626	12.1849	-1.27263
104	209	104	76	154	68	0.462952	5.13	-22.0774	-13.0865	5.75016
105	209	105	138	154	91	0.496521	3.88	-10.6618	-0.305295	8.44419
106	209	106	157	193	131	0.498144	3.66	-8.8127	6.97485	3.3552
107	209	107	0	168	107	0.58477	3.51	-17.7019	-20.0457	15.7119
108	209	108	0	168	107	0.484346	5.12	-11.8057	8.01363	0.882267
109	209	109	75	124	89	0.517888	4.78	-3.26867	-4.50854	-1.51543
110	209	110	75	124	89	0.457411	4.43	7.13399	-7.62947	-11.1214
111	209	111	138	154	91	0.420946	4.93	5.00005	-0.807186	-0.0612812
112	209	112	76	154	68	0.498414	3.51	-0.817087	15.8574	-1.72795
113	209	113	3	121	112	0.434966	3.76	-4.80274	-2.08065	16.0253
114	209	114	138	154	91	0.508573	4.68	10.4783	6.56392	-1.21672
115	209	115	75	124	89	0.460148	4.24	-3.55075	-3.89747	12.1402
116	209	116	0	168	107	0.471727	3.76	-16.4281	-15.6638	8.31943
117	209	117	157	193	131	0.701291	4.53	-0.653103	8.42697	-14.3962
118	209	118	157	193	131	0.476947	3.81	-2.38517	-9.81544	4.34475
119	209	119	138	154	91	0.407485	3.63	13.2105	18.3387	-20.3891
0	210	0	75	124	89	0.53669	3.87	4.79108	3.60604	-4.43493
1	210	1	76	154	68	0.48227	4.95	-20.6352	-7.10447	0.704974
2	210	2	3	121	112	0.561799	3.53	-10.3159	-6.34373	16.0206
3	210	3	76	154	68		4.84	-4.52127	-15.6382	15.3998
4	210	4	138	154	91		4.82	1.45809	13.6735	-9.39713
5	210	5	157	193	131	0.425619	3.71	-28.4293	-15.8284	6.78142
6	210	6	0	168	107	0.495118	5.12	-9.21168	-13.5393	-2.17956
7	210	7	0	168	107	0.580693	4.95	-2.83148	-4.70271	-2.49651
8	210	8	3	121	112	0.40821	4.76	-4.13769	4.89993	1.82307
9	210	9	76	154	68	0.540746	3.57	-7.17448	-13.3181	14.7247
10	210	10	76	154	68		3.67	2.75245	5.10755	2.89406
11	210	11	0	168	107	0.542025	5.36	-1.69484	0.513028	-2.38118
12	210	12	138	154	91	0.511525	5.04	14.3162	4.32255	-1.15753
13	210	13	138	154	91	0.575009	4.25	-1.72298	9.43644	-19.3781
14	210	14	75	124	89	0.470596	4.02	5.93123	1.47045	0.30887
15	210	15	76	154	68	0.441146	5.22	4.39211	-0.519429	-2.79669
16	210	16	75	124	89	0.55068	5.02	-1.97146	0.0868901	5.65915
17	210	17	76	154	68	0.438247	4.07	9.28281	-22.0225	6.03445
18	210	18	76	154	68	0.393823	5.4	2.49124	-11.9776	9.11527
19	210	19	3	121	112	0.413294	4.21	13.7852	41.4142	-32.7105
20	210	20	0	168	107	0.443908	4.05	-17.3122	-17.3799	11.0218
21	210	21	3	121	112	0.409545	4.11	5.43243	-8.91624	-0.865559
22	210	22	138	154	91	0.487173	3.8	-8.65599	0.37114	-5.179
23	210	23	157	193	131	0.648747	5.36	-15.3361	-14.2922	7.50457
24	210	24	0	168	107	0.57228	4.92	-4.55738	14.4389	-2.63577
25	210	25	138	154	91	0.456785	5.04	7.79321	1.12679	-3.07927
26	210	26	75	124	89		4.78	-0.719951	-12.0676	-3.59138
27	210	27	157	193	131	0.489842	3.64	-4.13003	4.26245	-3.31088
28	210	28	3	121	112	0.485508	5.24	-9.91489	-18.8275	16.8379
29	210	29	3	121	112	0.376968	3.55	11.7328	23.6059	-26.9935
30	210	30	0	168	107	0.576546	4.31	-2.08484	5.83115	2.48073
31	210	31	75	124	89		4.72	-7.15272	17.8783	3.0998
32	210	32	157	193	131	0.420705	3.87	-4.51814	-3.04696	9.68679
33	210	33	157	193	131	0.368349	5.28	-3.73556	-1.76805	-8.15381
34	210	34	3	121	112		4.37	1.90725	-9.9394	-1.09126
35	210	35	157	193	131	0.431468	4.1	-8.36966	-7.78539	3.58896
36	210	36	157	193	131	0.546087	3.92	-7.49701	-5.85736	7.5121
37	210	37	0	168	107	0.399701	4.82	-0.905267	5.58959	-6.51931
38	210	38	0	168	107	0.657188	4.85	-30.1693	-23.8692	22.2166
39	210	39	138	154	91	0.554735	4.12	-1.5987	5.50219	0.0755724
40	210	40	157	193	131	0.5903	4.21	-0.0323042	-0.915745	10.6971
41	210	41	157	193	131	0.453797	4.95	8.50466	6.87638	-4.23484
42	210	42	138	154	91	0.374362	5.34	2.95567	2.01018	3.08414
43	210	43	157	193	131	0.365841	5.02	-1.6174	-3.15946	-17.554
44	210	44	75	124	89	0.465517	4.14	12.2474	10.9142	-12.0774
45	210	45	157	193	131	0.408937	4.15	-8.21879	-2.77974	3.09874
46	210	46	75	124	89	0.424532	5.05	5.94957	-0.238735	3.32358
47	210	47	0	168	107	0.363041	5.43	-5.37494	6.1737	1.66878
48	210	48	76	154	68	0.572501	4.21	5.43749	-18.8017	-0.99993
49	210	49	75	124	89	0.453945	4.12	8.14173	12.7903	-4.46598
50	210	50	76	154	68	0.471746	4.04	-17.8541	-20.1201	24.22
51	210	51	157	193	131	0.503337	4.47	-4.86878	-8.70342	-11.2525
52	210	52	75	124	89	0.368894	5.17	12.634	6.29966	1.91477
53	210	53	138	154	91	0.547357	3.77	-1.18827	-20.5621	16.2081
54	210	54	75	124	89	0.391026	4.17	5.36503	-11.8058	3.94122
55	210	55	75	124	89	0.332581	3.56	-1.18844	-6.16767	2.39799
56	210	56	0	168	107	0.542118	3.95	6.3973	-3.27685	-5.47322
57	210	57	157	193	131	0.443733	5.24	-0.15371	6.30642	-3.01155
58	210	58	76	154	68	0.577269	3.58	-3.69769	-12.7509	-1.04206
59	210	59	0	168	107	0.507857	3.54	-11.0689	-12.0101	0.655691
60	210	60	3	121	112	0.5155	3.57	-6.95183	-10.551	2.4891
61	210	61	0	168	107	0.53317	4.15	3.59445	14.3793	-14.593
62	210	62	3	121	112		4.38	10.7833	5.67061	6.52671
63	210	63	138	154	91	0.664366	5.07	-10.6668	-10.9399	12.1595
64	210	64	157	193	131	0.547868	4.12	-6.89104	1.6581	3.57355
65	210	65	138	154	91	0.634468	4.79	1.62946	0.438815	0.384317
66	210	66	3	121	112		5.09	1.42488	-12.0308	-2.12246
67	210	67	3	121	112	0.603579	4.7	1.67019	6.8325	-6.53043
68	210	68	75	124	89	0.537068	4.97	16.2832	13.6773	-1.73688
69	210	69	157	193	131	0.562594	3.98	-3.99472	2.85594	-4.8366
70	210	70	76	154	68	0.599111	4.87	-7.16248	-0.167566	-6.52871
71	210	71	76	154	68	0.650698	4.59	-5.88257	-10.5279	7.91013
72	210	72	0	168	107	0.580274	4	1.8943	0.993016	7.19454
73	210	73	138	154	91		4.16	3.98262	4.51267	0.72382
74	210	74	157	193	131	0.499383	4.81	-2.91044	-0.531301	3.09077
75	210	75	3	121	112		5.02	-1.27429	-10.0384	8.64718
76	210	76	0	168	107	0.501473	4.91	-4.36	7.39438	-7.17842
77	210	77	0	168	107	0.50104	4.97	-7.16025	-5.50408	-1.39278
78	210	78	0	168	107	0.400635	4.59	-1.76241	-0.807406	-1.44201
79	210	79	138	154	91	0.366171	4.66	-6.15033	-3.34837	4.35643
80	210	80	76	154	68	0.395737	5.03	-1.69388	3.80419	-1.32413
81	210	81	138	154	91	0.582236	5.48	-10.9522	-7.74813	-7.56234
82	210	82	138	154	91	0.381641	4.3	-5.95104	-10.9348	-1.86098
83	210	83	3	121	112	0.447239	4.07	2.91811	11.4504	-5.48286
84	210	84	138	154	91	0.53278	3.68	-12.5382	3.53184	16.4032
85	210	85	3	121	112	0.592445	4.29	-6.26368	-14.5524	24.9934
86	210	86	138	154	91	0.593013	4.41	-18.5733	-42.7256	17.6193
87	210	87	157	193	131	0.520581	3.85	-13.2005	-4.82839	0.606979
88	210	88	0	168	107	0.396169	4.3	-14.3935	-10.8053	10.869
89	210	89	75	124	89	0.431715	5.03	-2.43417	-14.1809	3.3638
90	210	90	138	154	91	0.373256	5.1	3.76854	4.73447	-2.02117
91	210	91	3	121	112	0.52489	4.36	-9.33577	-6.98625	-0.282777
92	210	92	76	154	68	0.527401	4.93	-3.64003	-3.46198	-1.45164
93	210	93	75	124	89	0.380919	4.8	4.45187	7.76306	-5.06385
94	210	94	138	154	91		4.97	-2.79031	2.74298	13.4047
95	210	95	76	154	68		4.96	10.5449	-4.56061	4.02743
96	210	96	138	154	91	0.405535	4.14	11.4581	7.66366	-1.81354
97	210	97	0	168	107	0.588106	4.09	-2.5167	-16.2935	0.0491196
98	210	98	76	154	68		4.32	3.34449	3.86695	-8.05076
99	210	99	157	193	131	0.537164	4.32	13.2591	8.81471	-7.36442
100	210	100	75	124	89	0.386772	4.1	-4.3792	-9.62552	4.11785
101	210	101	157	193	131	0.46833	5.22	4.21058	-1.72622	-0.086617
102	210	102	76	154	68	0.513842	5.06	0.141536	2.48919	-1.33155
103	210	103	3	121	112	0.550353	4.04	3.91683	-1.70108	3.5032
104	210	104	75	124	89		4.65	16.3515	-2.15953	9.28752
105	210	105	76	154	68	0.491386	4.21	-1.41831	16.0577	-1.92879
106	210	106	76	154	68	0.441193	4.03	-3.93797	-8.36351	-2.99667
107	210	107	3	121	112	0.452749	3.6	-1.60365	4.03641	-3.39456
108	210	108	76	154	68	0.49439	4.96	-6.48486	-21.3294	4.34197
109	210	109	0	168	107	0.432925	5	-0.120862	0.233316	-9.98845
110	210	110	3	121	112	0.508485	4.35	1.84577	1.46525	-0.073448
111	210	111	3	121	112	0.495998	3.88	0.606482	0.896459	1.61171
112	210	112	75	124	89	0.627575	5.37	-3.92101	0.20527	3.99807
113	210	113	3	121	112	0.593039	5.26	11.2344	0.0943435	5.5847
114	210	114	75	124	89	0.427497	4.14	-6.25602	-10.6637	-3.05167
115	210	115	75	124	89	0.5311	4.23	-0.0865221	-17.3311	14.0109
116	210	116	75	124	89	0.660653	3.82	4.15298	-6.12198	3.63756
117	210	117	0	168	107	0.412297	5.12	-16.2703	-18.3039	-3.99808
118	210	118	157	193	131	0.53365	4.01	-5.23047	-1.80711	-1.77364
119	210	119	138	154	91	0.533188	3.79	-2.43897	-2.65726	11.6007
0	211	0	76	154	68		4.79	9.61612	-8.43379	-5.46347
1	211	1	0	168	107		4.34	-2.17533	12.4848	-6.8024
2	211	2	76	154	68		4.88	-18.7826	0.37735	10.8887
3	211	3	75	124	89	0.45659	4.15	4.50179	-4.21476	0.0541805
4	211	4	0	168	107	0.480106	4.6	-14.3395	-4.07318	2.88552
5	211	5	157	193	131	0.497706	5.24	-8.43826	-10.7317	-12.1352
6	211	6	0	168	107		3.6	-0.266231	16.3166	-21.5493
7	211	7	75	124	89	0.48796	4.38	9.83422	22.0491	-18.4831
8	211	8	75	124	89		3.51	-2.26828	-3.8179	9.26194
9	211	9	3	121	112	0.503112	3.63	-6.9468	-6.26917	17.4773
10	211	10	0	168	107	0.510763	5.26	-20.7782	-14.7775	17.4374
11	211	11	76	154	68		3.9	-13.6106	-12.9471	3.94263
12	211	12	3	121	112	0.494842	4.11	-4.75987	-19.4607	-5.7846
13	211	13	157	193	131	0.482435	3.63	-5.59605	13.1463	-2.1741
14	211	14	3	121	112	0.438123	3.78	-9.83522	-8.20348	6.86672
15	211	15	76	154	68		4.02	-14.3366	19.3119	5.59682
16	211	16	138	154	91	0.497355	4.47	-10.7644	-33.8258	20.1238
17	211	17	0	168	107		4.95	-6.30556	9.15501	-7.0832
18	211	18	3	121	112		3.96	-11.0954	-13.1109	5.82329
19	211	19	157	193	131	0.499059	5.45	-4.12774	16.9311	2.2123
20	211	20	157	193	131	0.458504	5.07	-23.5578	-22.1768	15.4287
21	211	21	75	124	89	0.466011	4.74	-7.6866	-15.0185	13.5413
22	211	22	76	154	68	0.497594	5	-5.42305	1.19089	9.03832
23	211	23	157	193	131		3.55	-1.1617	17.7003	-8.14263
24	211	24	75	124	89		4.26	-3.55422	-26.346	2.58017
25	211	25	157	193	131		4.19	-12.6923	-6.22179	-0.902772
26	211	26	138	154	91		4.63	2.72012	-3.88064	-21.7702
27	211	27	75	124	89	0.518465	3.71	-6.87809	-18.4748	-2.14837
28	211	28	157	193	131	0.508066	3.82	-1.48144	19.1526	-10.9876
29	211	29	3	121	112		4.65	-1.13484	23.7419	-4.9779
30	211	30	76	154	68	0.514247	4.32	-23.6033	13.1128	22.7241
31	211	31	76	154	68		4.09	-14.9611	4.01116	23.0473
32	211	32	157	193	131		4.41	5.73695	10.9486	1.33911
33	211	33	157	193	131	0.517081	4.2	-19.9561	-8.84635	11.2048
34	211	34	0	168	107	0.450666	4.43	-31.6082	-13.8961	9.90755
35	211	35	76	154	68		4.73	-5.68023	-10.6341	-7.17643
36	211	36	75	124	89		3.51	-2.13887	6.58737	2.32676
37	211	37	75	124	89		4.56	-1.49074	-14.3837	4.45931
38	211	38	0	168	107	0.519987	4.8	-12.7902	6.12111	1.47371
39	211	39	138	154	91	0.401444	4.87	-8.82969	7.10161	4.87594
40	211	40	75	124	89	0.455008	4.62	-8.73937	-26.4271	7.24359
41	211	41	3	121	112	0.41053	5.43	-6.3247	-2.37751	0.459265
42	211	42	3	121	112		3.87	-10.0081	3.49002	-0.999454
43	211	43	157	193	131	0.482693	5.31	4.23119	22.7348	-13.2411
44	211	44	157	193	131	0.440277	5.43	-11.921	9.10419	-3.89765
45	211	45	3	121	112		5.22	-8.70941	-4.53377	13.021
46	211	46	138	154	91		4.28	3.56024	13.9002	-1.32247
47	211	47	138	154	91	0.484846	3.9	-13.1384	-6.37501	10.1394
48	211	48	0	168	107	0.497464	5.47	-1.55379	5.75094	-8.79028
49	211	49	75	124	89	0.50103	3.94	-5.00486	-4.14494	-8.32178
50	211	50	76	154	68	0.418614	3.85	8.04132	5.62896	-4.44505
51	211	51	76	154	68	0.454251	5.47	0.496804	2.23004	4.92179
52	211	52	0	168	107	0.423734	4.38	-5.42583	-0.0782402	3.02092
53	211	53	138	154	91	0.498236	4.13	-3.57363	16.8389	-7.89671
54	211	54	3	121	112	0.481835	4.47	-22.8817	-15.4899	14.4832
55	211	55	138	154	91	0.489404	4.33	-15.0192	9.00116	2.70631
56	211	56	3	121	112	0.412938	3.7	-15.1265	-18.4539	9.13247
57	211	57	76	154	68	0.436551	4.48	-5.75699	2.23078	-12.2291
58	211	58	3	121	112	0.478101	3.74	9.94979	4.48984	-7.0181
59	211	59	157	193	131		4.32	-20.0628	-5.70098	8.98614
60	211	60	3	121	112		5.47	4.05355	5.93126	-0.663624
61	211	61	76	154	68	0.453837	5.25	-10.0312	14.5353	1.17242
62	211	62	76	154	68	0.44533	4.31	-4.22968	6.57818	-0.188284
63	211	63	157	193	131	0.498898	3.69	-11.817	-19.7668	11.1518
64	211	64	75	124	89		4.16	-9.80055	11.9752	-1.33332
65	211	65	138	154	91	0.489182	4.43	-0.201994	7.66086	-2.89437
66	211	66	0	168	107	0.480811	3.78	-15.5628	-23.1886	15.082
67	211	67	76	154	68	0.486427	3.6	-14.3878	-3.78516	-1.74929
68	211	68	75	124	89	0.418064	4.29	-2.73057	15.6883	-13.8584
69	211	69	3	121	112	0.409661	5.31	11.2147	15.4648	-5.86116
70	211	70	138	154	91	0.467118	4.09	-18.2689	-13.0753	10.1033
71	211	71	138	154	91	0.44773	5.07	-3.93264	2.8848	-1.9031
72	211	72	76	154	68	0.503356	3.75	3.07767	8.2309	-1.41369
73	211	73	157	193	131	0.396843	4.03	10.8007	19.2902	-5.63375
74	211	74	75	124	89	0.452424	4.2	7.47646	1.84907	-3.14238
75	211	75	75	124	89		5.48	18.9899	5.92969	-4.98155
76	211	76	0	168	107	0.389509	5.24	-10.4465	-4.29678	-3.31735
77	211	77	76	154	68	0.370052	5.06	10.965	17.3086	-12.3511
78	211	78	0	168	107	0.451583	4.15	-12.317	-12.1696	7.09982
79	211	79	75	124	89		4.12	8.50257	2.84428	0.416607
80	211	80	3	121	112		4.98	1.36387	11.6686	10.8014
81	211	81	138	154	91	0.498283	3.57	-8.60503	9.52213	11.2149
82	211	82	75	124	89	0.517898	3.89	-7.15311	-0.274129	9.48673
83	211	83	3	121	112	0.478604	3.65	1.70361	4.71712	-12.1223
84	211	84	3	121	112	0.448119	4.04	5.59383	24.8327	-20.6765
85	211	85	157	193	131		4.03	4.0256	14.9353	-18.2671
86	211	86	0	168	107		5.27	-6.9953	-14.1583	21.0822
87	211	87	0	168	107	0.470933	5.29	-18.0002	6.9659	3.51553
88	211	88	3	121	112	0.502428	4.85	0.471962	29.002	-12.7105
89	211	89	138	154	91	0.500927	5.14	0.567738	13.2551	-16.6653
90	211	90	75	124	89		5.24	5.03941	3.90069	-18.9173
91	211	91	138	154	91	0.509938	3.64	-6.44468	14.579	-5.5058
92	211	92	0	168	107		4.96	7.6255	14.5715	7.76979
93	211	93	3	121	112	0.477087	4.82	-3.56931	-15.9516	8.63496
94	211	94	138	154	91	0.440673	4.15	13.8291	11.3305	-14.9467
95	211	95	76	154	68	0.399265	5.46	-20.9897	2.5968	6.87136
96	211	96	157	193	131	0.510784	4.62	-7.91671	8.72147	7.89219
97	211	97	0	168	107	0.42031	5.15	-1.69915	17.4203	-3.42398
98	211	98	157	193	131	0.46586	3.74	-24.7635	-18.8328	19.3319
99	211	99	0	168	107	0.379446	3.62	-8.60006	7.87888	8.11583
100	211	100	76	154	68	0.449107	5.01	-12.7732	4.82672	10.1918
101	211	101	0	168	107	0.431652	4.16	-4.51855	-10.1721	2.65744
102	211	102	0	168	107	0.511253	4.09	-3.17761	5.39597	-15.1021
103	211	103	75	124	89		4.92	-2.69265	4.09005	-19.0988
104	211	104	138	154	91	0.448452	3.69	-1.87531	7.02947	-7.06294
105	211	105	138	154	91	0.33006	4.44	-17.3942	-6.5106	4.97511
106	211	106	157	193	131	0.419601	4.04	13.3126	42.8663	-5.92529
107	211	107	157	193	131	0.422285	5.17	-7.2051	5.48873	5.58489
108	211	108	75	124	89	0.393733	5.41	-14.3924	-4.77001	14.9914
109	211	109	138	154	91	0.455153	3.68	-7.99048	4.67186	4.49647
110	211	110	157	193	131		4.25	-4.36615	17.671	0.14344
111	211	111	138	154	91	0.502385	5.36	-3.81122	-0.48524	11.3126
112	211	112	76	154	68	0.508945	4.61	-17.2101	-6.3427	6.84917
113	211	113	76	154	68	0.486526	4.73	3.07684	21.9539	-11.6966
114	211	114	138	154	91		4.33	-4.28739	11.7102	0.553211
115	211	115	138	154	91	0.421565	3.55	-1.73864	-0.142283	-2.72128
116	211	116	3	121	112		4.1	-0.731408	-9.64587	1.43082
117	211	117	0	168	107		4.32	-16.3964	-17.1029	-1.85153
118	211	118	75	124	89	0.505388	4.45	8.49053	24.8887	-2.53981
119	211	119	3	121	112	0.472991	4.27	2.16046	-4.98413	0.993057
0	212	0	157	193	131		3.75	-16.1799	-8.31832	-1.10046
1	212	1	0	168	107		4.61	-14.8542	-9.59879	14.2769
2	212	2	3	121	112	0.429918	5.12	6.12534	9.93853	3.52858
3	212	3	3	121	112	0.443405	4.68	-17.4605	-33.4306	4.7416
4	212	4	0	168	107	0.533754	4.33	-2.23268	-7.36861	0.439198
5	212	5	138	154	91	0.589367	5.2	-3.31814	-7.2701	3.95568
6	212	6	157	193	131	0.546802	3.54	-9.15674	3.35789	-16.9277
7	212	7	0	168	107	0.762418	5.45	-9.7567	9.21076	-14.77
8	212	8	75	124	89	0.473958	3.73	8.50805	-0.682219	-3.75309
9	212	9	138	154	91	0.577608	4.76	-11.6313	-7.56977	-5.14421
10	212	10	138	154	91	0.550172	4.96	2.01856	17.0003	-2.0013
11	212	11	3	121	112	0.571633	4.19	4.73015	10.6007	7.21561
12	212	12	75	124	89	0.561275	3.99	8.17458	-14.9208	21.3193
13	212	13	0	168	107	0.546845	4.24	-21.6618	-18.9215	8.62258
14	212	14	75	124	89	0.676436	5.01	7.54301	-5.03771	-9.23985
15	212	15	138	154	91	0.657023	3.75	3.53313	1.89369	-12.9999
16	212	16	0	168	107	0.732566	4.77	1.03159	17.7591	-10.2886
17	212	17	138	154	91	0.671926	4.06	-6.69837	-6.9267	11.0343
18	212	18	75	124	89	0.567652	3.55	5.06803	7.07633	-1.74773
19	212	19	76	154	68	0.687212	5.16	-7.97272	-5.29779	2.7056
20	212	20	0	168	107	0.60074	4.1	-15.0187	-15.8212	11.0899
21	212	21	157	193	131	0.683315	3.6	-30.1073	-1.02393	5.16367
22	212	22	0	168	107	0.764933	3.54	-15.543	-8.02917	8.98977
23	212	23	157	193	131	0.712548	4.07	-13.748	10.9759	-9.15883
24	212	24	75	124	89	0.756021	5.31	8.68514	18.7925	-0.705288
25	212	25	76	154	68	0.51157	3.55	-1.31476	8.0006	-14.5847
26	212	26	138	154	91	0.645091	4.48	-9.56722	21.3653	1.11165
27	212	27	157	193	131	0.797696	4.4	-16.6586	-42.4767	27.0809
28	212	28	157	193	131		3.76	-24.4514	0.252535	7.33881
29	212	29	157	193	131	0.67084	3.69	0.844743	-5.26573	-1.61964
30	212	30	76	154	68	0.728427	3.51	-21.6828	-17.2512	4.53612
31	212	31	157	193	131	0.634047	4.19	-4.13366	-8.05092	-6.8667
32	212	32	157	193	131	0.735649	4.51	1.65433	10.7806	-4.35873
33	212	33	3	121	112	0.528282	4.54	5.64471	-22.4837	19.8243
34	212	34	157	193	131	0.567776	3.54	-31.3047	-9.79435	17.9601
35	212	35	76	154	68	0.583431	4.32	-11.8145	-4.63215	-1.1552
36	212	36	138	154	91	0.588853	3.71	3.38069	8.22647	-13.6705
37	212	37	0	168	107	0.512564	3.57	1.78534	-14.934	-6.16539
38	212	38	138	154	91	0.720183	3.5	-8.85023	-8.19555	-0.620125
39	212	39	0	168	107	0.518647	4.75	2.35657	-0.683396	2.48795
40	212	40	138	154	91	0.616348	5.41	-0.513933	7.63113	6.66429
41	212	41	75	124	89	0.607723	5.23	7.68326	-30.6684	19.9539
42	212	42	157	193	131	0.595115	4.02	-25.5257	-23.1025	10.652
43	212	43	0	168	107	0.594796	3.55	-11.5343	-9.41918	-12.7285
44	212	44	157	193	131	0.704388	4.24	-7.61553	18.4397	-5.75003
45	212	45	138	154	91	0.745018	3.66	-22.5032	-10.4101	9.65421
46	212	46	3	121	112	0.832597	4.47	2.37993	14.5666	2.99639
47	212	47	75	124	89	0.60405	4.01	-2.72254	-16.5962	4.44753
48	212	48	75	124	89	0.647633	3.85	3.45436	17.68	-13.5496
49	212	49	3	121	112	0.535229	4.1	-10.6474	3.98641	-1.80501
50	212	50	157	193	131	0.602918	4.6	-12.7746	-3.49555	-1.41199
51	212	51	3	121	112	0.651295	4.06	6.46934	2.418	-18.4011
52	212	52	76	154	68	0.601077	4.05	0.869731	5.84919	-7.87007
53	212	53	75	124	89	0.668635	4.46	10.2351	-10.3937	8.75173
54	212	54	76	154	68	0.406243	4.08	-0.461545	-5.63195	8.29299
55	212	55	76	154	68	0.781767	3.55	-3.16797	2.98385	6.28545
56	212	56	76	154	68	0.635381	4.13	-19.4338	-6.73476	1.69833
57	212	57	3	121	112	0.615747	5.4	3.58981	-5.27619	-6.01329
58	212	58	3	121	112	0.583223	4.21	1.53088	2.44974	3.36158
59	212	59	0	168	107	0.622756	4.74	-11.3622	4.05199	6.54856
60	212	60	138	154	91	0.558297	3.58	-9.28982	-33.2491	25.726
61	212	61	76	154	68	0.746025	3.54	-9.04813	-8.91786	1.84196
62	212	62	75	124	89	0.344655	4.98	6.70602	4.46307	-6.85898
63	212	63	75	124	89		4.08	3.05167	19.3651	-22.4643
64	212	64	76	154	68	0.759615	4.83	-3.15174	11.524	-14.4589
65	212	65	157	193	131	0.643323	3.76	1.09765	20.1287	-1.59913
66	212	66	76	154	68	0.566898	4.26	-9.58675	-14.2852	9.4493
67	212	67	75	124	89	0.500591	3.6	17.4706	19.5767	-12.9077
68	212	68	0	168	107	0.615008	4.14	-11.6326	-8.67922	6.73475
69	212	69	76	154	68		5.01	-1.46614	14.8472	-8.98079
70	212	70	0	168	107	0.68601	4.85	-7.7662	6.50329	-4.53657
71	212	71	3	121	112	0.607619	5.35	-1.44833	-4.62614	4.78955
72	212	72	75	124	89	0.61713	4.5	-0.794301	-14.5234	-1.58917
73	212	73	3	121	112	0.637534	3.57	13.8599	-1.19617	-9.02585
74	212	74	76	154	68		4.31	9.94962	28.3226	-16.9409
75	212	75	3	121	112	0.670649	4.42	8.1898	5.79339	0.573066
76	212	76	76	154	68	0.79422	4.21	-6.43357	-7.06933	10.0115
77	212	77	0	168	107	0.647951	3.61	-12.0927	-9.13887	10.1742
78	212	78	3	121	112	0.549565	4.98	-0.0811685	-2.56553	6.48113
79	212	79	75	124	89	0.579954	4.69	2.71045	11.9451	-1.96247
80	212	80	76	154	68	0.799476	4.59	13.5584	-25.894	12.1002
81	212	81	76	154	68	0.58114	3.93	0.942218	-7.06426	-5.60235
82	212	82	76	154	68	0.650586	5.25	0.269134	-2.61116	-11.0189
83	212	83	0	168	107	0.568107	5.32	-5.73034	17.2776	-20.2454
84	212	84	157	193	131	0.589788	3.92	-6.26666	23.6209	-25.2621
85	212	85	75	124	89		5.2	-2.93676	-2.8092	4.92102
86	212	86	76	154	68	0.471851	4.15	-2.48277	21.7853	2.29814
87	212	87	0	168	107	0.497426	5.19	-21.8148	-40.0095	27.139
88	212	88	157	193	131	0.550832	4.5	-13.3218	5.04332	-1.67563
89	212	89	157	193	131	0.746241	4.95	-10.7267	-17.6745	18.4075
90	212	90	3	121	112	0.512944	5.26	7.20265	19.1576	-15.0964
91	212	91	138	154	91	0.504322	4.82	-12.2385	-7.57988	20.7678
92	212	92	75	124	89	0.591914	3.99	10.2265	19.3891	-19.2358
93	212	93	76	154	68	0.591445	3.66	-10.3327	8.62368	2.08371
94	212	94	138	154	91	0.504934	4.86	-0.652923	7.92958	-7.24514
95	212	95	138	154	91	0.522581	3.73	2.86237	0.352116	-5.42014
96	212	96	0	168	107	0.561093	3.85	-13.2364	1.81496	-10.552
97	212	97	3	121	112	0.574628	3.51	0.104516	17.0873	-2.24969
98	212	98	75	124	89	0.534374	4.1	-2.21241	-16.1323	12.8878
99	212	99	75	124	89	0.525941	4.32	-2.71073	-9.25626	1.96108
100	212	100	75	124	89	0.549594	4.34	-1.77739	2.93161	9.08044
101	212	101	157	193	131	0.554939	5.44	-31.3364	-8.27771	8.42478
102	212	102	75	124	89	0.607561	3.53	9.04296	3.85366	-14.3028
103	212	103	3	121	112	0.555152	4.59	5.14805	13.2908	-4.3575
104	212	104	76	154	68	0.418658	4.87	-5.60573	12.9904	-5.64867
105	212	105	138	154	91	0.518286	4.68	-20.9499	-0.159488	16.0645
106	212	106	3	121	112	0.485668	3.65	-1.43529	10.9323	1.24342
107	212	107	138	154	91	0.560278	5.23	-14.3511	-5.47569	7.7654
108	212	108	157	193	131	0.559886	4.36	-13.0338	-2.45547	5.75889
109	212	109	3	121	112	0.639446	5.15	-6.60235	-23.5773	1.65816
110	212	110	0	168	107	0.548787	5.06	-4.39611	-6.10279	-3.45906
111	212	111	0	168	107	0.588376	3.88	-12.5726	-25.6549	10.1988
112	212	112	3	121	112	0.555944	5.36	-0.707009	1.47845	-8.1972
113	212	113	138	154	91	0.548464	4.55	7.63466	6.2282	-1.93926
114	212	114	0	168	107	0.541906	4.65	-19.1743	2.1604	9.99177
115	212	115	3	121	112	0.523561	5.16	14.7135	11.8594	1.49995
116	212	116	138	154	91	0.528974	4.18	-15.6471	2.49738	2.75695
117	212	117	157	193	131	0.424577	3.7	-20.2037	-11.4233	8.81789
118	212	118	138	154	91	0.557299	4.12	-7.91143	-0.570928	0.867834
119	212	119	138	154	91	0.498861	4.34	-1.85708	-12.8161	-5.20348
0	213	0	138	154	91	0.776147	4.8	-3.3652	2.92431	13.0871
1	213	1	0	168	107	0.587669	4.58	-18.7519	-5.0637	12.0636
2	213	2	0	168	107	0.593304	4.99	-6.9729	-4.40296	2.49469
3	213	3	75	124	89	0.557794	5.42	9.04268	-7.86486	-10.1685
4	213	4	76	154	68	0.513265	4.88	-9.84405	-5.50108	10.5491
5	213	5	138	154	91	0.610796	5.04	-2.05386	3.67581	11.8043
6	213	6	76	154	68	0.57631	4.52	7.96044	7.05812	-19.9357
7	213	7	75	124	89	0.461822	4.34	23.0402	-1.12611	-21.4849
8	213	8	76	154	68	0.42837	4.94	8.10976	13.2462	-11.3639
9	213	9	157	193	131	0.479817	5.45	-17.7568	-9.25142	8.30293
10	213	10	76	154	68	0.42738	3.82	-10.4982	-19.432	12.6148
11	213	11	75	124	89	0.478901	4.89	-3.17123	-13.6689	10.9224
12	213	12	75	124	89	0.378434	4.09	22.8458	1.8879	-4.86866
13	213	13	3	121	112	0.495042	3.51	5.59443	15.4808	-9.20105
14	213	14	157	193	131	0.44264	3.55	0.42533	18.2642	2.51032
15	213	15	3	121	112	0.504303	5.04	9.79647	8.0922	-12.3875
16	213	16	75	124	89	0.449723	5.47	13.9335	-2.65177	9.2067
17	213	17	157	193	131	0.537231	5.47	-2.57242	-3.39807	-2.04955
18	213	18	76	154	68	0.430684	5.31	-9.26918	-31.9716	17.0449
19	213	19	138	154	91	0.457238	5	-8.97931	-14.0863	19.9854
20	213	20	0	168	107	0.522663	4.08	-6.17764	-15.4461	12.824
21	213	21	3	121	112	0.4923	4.48	24.9644	21.7943	-36.3236
22	213	22	3	121	112	0.469843	5.35	26.4628	16.2899	-16.0489
23	213	23	0	168	107	0.461375	3.88	2.28026	-17.4055	-18.1018
24	213	24	157	193	131	0.575913	4.92	-10.1904	-13.8208	8.63853
25	213	25	0	168	107	0.571397	4.8	-14.0842	-12.2427	28.4151
26	213	26	157	193	131	0.612929	4.09	-9.81529	-8.81981	0.687454
27	213	27	0	168	107	0.566484	5.1	-15.0775	0.201715	-5.61182
28	213	28	0	168	107	0.503957	4.17	-18.6523	-15.7765	-0.592635
29	213	29	75	124	89	0.595496	4.04	-15.585	-21.7017	-4.18772
30	213	30	138	154	91	0.694115	4.75	-7.41935	-4.69283	7.62185
31	213	31	3	121	112	0.433654	5.09	0.881398	19.7047	13.2257
32	213	32	0	168	107	0.537138	5.39	4.28834	-0.556055	0.156411
33	213	33	0	168	107	0.556686	4.37	-17.2783	-29.7415	8.17962
34	213	34	0	168	107	0.544183	3.77	-4.42717	-12.3715	-8.64656
35	213	35	76	154	68	0.512788	4.25	-18.722	-14.1182	8.33448
36	213	36	75	124	89	0.41436	3.52	23.6061	24.5893	-18.573
37	213	37	3	121	112	0.489947	4.59	-2.92418	-20.1664	28.1829
38	213	38	3	121	112	0.553506	3.81	-22.0176	-46.3654	25.4065
39	213	39	157	193	131	0.54718	3.57	-24.192	-22.8289	0.78445
40	213	40	0	168	107	0.726707	4.21	-23.4895	-32.2704	0.957439
41	213	41	157	193	131	0.515352	3.87	-23.3781	-31.7026	20.9182
42	213	42	157	193	131	0.438893	4.59	-31.3452	-11.5861	14.7907
43	213	43	75	124	89	0.6625	3.64	-27.1711	-28.4044	26.159
44	213	44	157	193	131	0.496032	3.61	-12.6861	-30.5423	27.5076
45	213	45	3	121	112	0.579609	4.68	-3.90006	4.45026	-17.6134
46	213	46	138	154	91	0.429107	4.28	-28.5282	-10.6299	17.6901
47	213	47	3	121	112	0.419701	4.95	-16.4338	-11.4088	11.0107
48	213	48	157	193	131	0.553184	3.78	-25.7712	-14.7975	10.4995
49	213	49	3	121	112	0.602826	4.03	-18.9859	-50.2773	20.6052
50	213	50	76	154	68	0.574387	3.95	-30.017	-36.0484	9.6744
51	213	51	0	168	107	0.439991	4.82	-33.9336	-12.1038	10.9184
52	213	52	138	154	91	0.475485	5.2	-10.0097	13.3143	-0.0537945
53	213	53	3	121	112	0.44399	5.11	-21.5692	-22.7815	11.4818
54	213	54	138	154	91	0.389509	4.42	6.92328	-8.21917	-6.72698
55	213	55	157	193	131	0.365098	4.53	5.30059	-5.62284	2.68621
56	213	56	157	193	131	0.720589	4.16	-23.5139	-13.4636	2.72228
57	213	57	157	193	131	0.62419	4.58	-11.7269	12.2004	-21.5905
58	213	58	75	124	89	0.465761	5.04	10.6205	20.8938	-12.0783
59	213	59	138	154	91	0.460252	4.93	-0.34032	5.90849	9.17009
60	213	60	138	154	91	0.495786	3.74	-6.36292	-12.3763	26.1288
61	213	61	0	168	107	0.511363	3.92	8.76766	18.0445	-9.47037
62	213	62	75	124	89	0.446924	5.34	-3.10051	7.44824	16.2723
63	213	63	157	193	131	0.478346	5.19	-40.0075	-28.5391	22.2183
64	213	64	76	154	68	0.458857	4.6	-2.00055	-8.62941	-3.5667
65	213	65	157	193	131	0.50239	5.09	-17.3265	3.27241	-4.04732
66	213	66	76	154	68	0.48989	4.41	6.76663	0.807655	-7.90869
67	213	67	0	168	107	0.471456	4.73	-25.9946	-9.23113	-1.21439
68	213	68	138	154	91	0.490951	3.79	-14.6879	4.6028	-15.5296
69	213	69	138	154	91	0.594662	5.2	3.0063	21.2952	-22.1787
70	213	70	76	154	68	0.451021	4.01	7.09472	46.5307	-24.737
71	213	71	76	154	68	0.456635	3.98	2.38226	-17.6439	24.5495
72	213	72	76	154	68	0.350296	5.1	-3.28099	-6.13851	18.7075
73	213	73	75	124	89	0.411739	4.98	-0.272638	9.46291	18.4332
74	213	74	138	154	91	0.405277	4.47	-8.52265	-18.4366	8.67446
75	213	75	0	168	107	0.453786	4.13	-2.66249	3.31819	7.51912
76	213	76	76	154	68	0.453446	5.08	-11.8727	-3.28132	5.7347
77	213	77	75	124	89	0.430894	5.36	-26.5806	-4.31901	-11.6092
78	213	78	3	121	112	0.422417	3.98	-8.06236	18.9763	-16.8356
79	213	79	3	121	112	0.539944	4.36	8.49468	-15.3178	-4.9331
80	213	80	0	168	107	0.451537	4.39	12.606	47.8995	-34.6753
81	213	81	76	154	68	0.492038	4.77	12.581	33.3845	-24.9306
82	213	82	3	121	112	0.459575	5.39	22.3365	27.8868	1.19166
83	213	83	3	121	112	0.465123	4.89	2.39774	-17.4148	23.5859
84	213	84	76	154	68	0.440551	3.57	-12.0538	-21.6878	14.081
85	213	85	75	124	89	0.64414	4.86	17.6732	41.2098	-14.5587
86	213	86	76	154	68	0.478689	4.03	-3.4173	6.98707	-13.2686
87	213	87	3	121	112	0.402228	3.72	14.2004	-17.2533	15.111
88	213	88	157	193	131	0.375849	5.42	-18.4599	-19.772	11.4405
89	213	89	138	154	91	0.419329	3.65	-14.5907	-28.7349	23.73
90	213	90	3	121	112	0.494899	5.3	-2.10891	6.95975	14.9048
91	213	91	157	193	131	0.41044	5.07	-33.151	-51.7568	20.3014
92	213	92	138	154	91	0.462996	4.29	7.1314	47.8275	-31.1444
93	213	93	75	124	89	0.422474	3.52	-2.25192	17.7883	-22.2449
94	213	94	75	124	89	0.544164	4.89	-8.4299	-4.73682	-2.44807
95	213	95	3	121	112	0.447656	5.44	6.4234	25.1283	-17.6818
96	213	96	0	168	107	0.463185	4.51	-6.57293	-14.6937	5.1349
97	213	97	0	168	107	0.643686	4.64	-13.3846	-8.2731	-4.73961
98	213	98	76	154	68	0.49922	5.21	-4.95531	-8.18405	-2.23804
99	213	99	157	193	131	0.44467	5.41	-7.11786	1.18815	21.2542
100	213	100	75	124	89	0.422197	5.17	1.42579	17.9604	34.4389
101	213	101	0	168	107	0.56557	5.06	-19.9576	-0.142878	-8.49132
102	213	102	75	124	89	0.538076	5.15	-3.04903	-5.87453	-7.06091
103	213	103	138	154	91	0.733539	4.57	-18.1485	-1.60234	7.34977
104	213	104	3	121	112	0.453206	3.68	6.86865	-4.49196	-1.97523
105	213	105	75	124	89	0.462783	3.59	13.0731	0.775766	-8.73539
106	213	106	75	124	89	0.480385	3.71	2.73785	0.121762	-10.9044
107	213	107	157	193	131	0.457951	3.85	18.9519	23.693	-26.6462
108	213	108	76	154	68	0.469522	5.03	-26.943	-19.8213	7.73255
109	213	109	138	154	91	0.434072	4.4	5.2778	43.5646	-25.4256
110	213	110	138	154	91	0.529597	3.89	2.40905	27.9741	-16.2429
111	213	111	76	154	68	0.545263	3.96	0.268927	41.8104	-6.6971
112	213	112	0	168	107	0.398884	3.97	-18.6414	35.4477	0.98877
113	213	113	3	121	112	0.408466	4.97	-11.5851	37.0461	5.85507
114	213	114	138	154	91	0.454988	3.53	-15.9518	-32.3599	25.3221
115	213	115	76	154	68	0.506567	3.56	7.10004	-4.46066	6.44182
116	213	116	138	154	91	0.422274	3.87	-35.0296	-33.2402	17.3986
117	213	117	157	193	131	0.431745	3.77	-3.7037	10.0406	-11.0573
118	213	118	75	124	89	0.371318	5.08	-17.0492	7.24835	-0.202844
119	213	119	138	154	91	0.500784	5.32	7.08136	16.4708	-22.1494
0	214	0	157	193	131		4.63	-23.4615	17.1278	5.00646
1	214	1	0	168	107	0.409741	4.97	-0.717769	-1.32012	1.54405
2	214	2	3	121	112	0.443283	4.9	1.33312	-6.96881	2.56232
3	214	3	157	193	131	0.384717	4.27	-9.06724	30.2362	1.07387
4	214	4	138	154	91	0.458266	4.53	-9.86246	9.08146	-2.34503
5	214	5	138	154	91	0.392044	5.17	6.96615	-15.2951	-0.932046
6	214	6	75	124	89	0.53055	4.2	3.6236	9.59871	-8.39138
7	214	7	138	154	91	0.486116	3.7	0.606222	9.12111	5.15105
8	214	8	138	154	91	0.407744	3.88	15.1611	3.63069	-4.61059
9	214	9	76	154	68	0.399356	3.7	0.914867	4.02506	-15.8085
10	214	10	76	154	68	0.43489	4.96	16.1036	20.9979	-19.7137
11	214	11	0	168	107	0.500466	5.2	6.87222	-6.73517	-1.38221
12	214	12	75	124	89	0.378906	3.51	4.50574	-7.89109	0.153136
13	214	13	3	121	112	0.444449	4.65	22.9654	37.3043	-17.9888
14	214	14	75	124	89	0.468041	4.85	-5.45263	-3.78444	18.5619
15	214	15	0	168	107	0.567467	3.51	-10.3866	-23.3605	13.923
16	214	16	75	124	89	0.449219	4.65	19.054	14.1275	-15.0225
17	214	17	157	193	131	0.474617	5.42	-5.49106	-1.00477	4.41575
18	214	18	3	121	112	0.387145	4.87	3.55358	-9.57511	2.45081
19	214	19	75	124	89	0.424758	3.99	1.05863	-12.4881	4.90349
20	214	20	0	168	107	0.476355	5.34	3.1509	-9.7407	-5.7191
21	214	21	3	121	112	0.431945	3.67	5.97828	10.419	-12.0217
22	214	22	3	121	112	0.439501	5.1	12.7256	10.245	-6.51659
23	214	23	157	193	131	0.385084	4.53	8.95497	6.01389	-0.805424
24	214	24	75	124	89	0.437622	4.35	8.7076	0.910686	6.55923
25	214	25	0	168	107	0.443268	3.69	4.84553	3.09985	-4.03797
26	214	26	76	154	68	0.474848	4.49	0.71453	14.1255	2.46511
27	214	27	0	168	107	0.416312	4.08	9.16004	21.7846	-18.1751
28	214	28	0	168	107	0.431971	4.1	12.3895	17.2075	-15.5013
29	214	29	138	154	91	0.401605	4.77	-1.08679	-12.6142	1.96014
30	214	30	75	124	89	0.352127	3.55	8.90453	0.567538	-4.57054
31	214	31	75	124	89	0.557566	4.03	-5.69134	-10.3069	11.559
32	214	32	0	168	107	0.439218	4.39	1.65722	5.10343	-4.02536
33	214	33	75	124	89	0.392681	5.37	10.204	0.926083	7.21411
34	214	34	138	154	91	0.362235	4.6	4.74702	3.202	-6.20442
35	214	35	157	193	131	0.367939	5.09	-10.1164	-6.35019	-0.501023
36	214	36	138	154	91	0.392459	3.87	2.73878	-17.9822	3.22538
37	214	37	3	121	112	0.566035	4.87	-1.60371	-1.49019	0.119882
38	214	38	157	193	131	0.383613	5.14	-0.635121	-1.96827	2.96618
39	214	39	3	121	112	0.413054	3.83	4.20636	5.65457	-1.07515
40	214	40	157	193	131	0.466616	3.96	-2.37342	5.58718	3.61146
41	214	41	0	168	107		4.37	-11.0456	-19.7517	5.16319
42	214	42	138	154	91	0.482897	3.84	6.59629	18.0066	-1.94669
43	214	43	76	154	68	0.544489	3.89	-12.0052	-13.5721	12.6746
44	214	44	157	193	131	0.532092	4.97	7.61655	17.8882	-15.062
45	214	45	138	154	91	0.41762	3.5	-4.7867	2.66467	-1.58242
46	214	46	138	154	91	0.47529	4.25	5.62087	6.71728	-8.7556
47	214	47	0	168	107	0.444888	4.73	3.31076	6.87941	-3.89547
48	214	48	76	154	68	0.421441	5.31	4.59364	7.34701	-4.98011
49	214	49	157	193	131	0.362873	4.19	-5.64259	-0.732359	-3.43597
50	214	50	3	121	112	0.492317	4.71	8.95904	9.0328	-14.807
51	214	51	157	193	131	0.372024	4.27	6.34719	27.0292	-6.94883
52	214	52	75	124	89	0.345565	5.47	5.47201	4.47697	15.118
53	214	53	3	121	112	0.359881	4.3	1.16964	11.4129	-10.6296
54	214	54	157	193	131	0.43757	4.35	0.545076	15.199	-8.66028
55	214	55	157	193	131	0.35521	3.92	-9.23332	-1.2831	3.2982
56	214	56	3	121	112	0.41081	4.24	-3.20448	0.849973	-0.316715
57	214	57	76	154	68	0.408361	4.2	7.00044	5.46862	-8.32513
58	214	58	76	154	68	0.413971	5.45	6.15862	9.41133	-1.58442
59	214	59	3	121	112	0.434297	3.62	6.69107	20.8557	-9.29109
60	214	60	138	154	91	0.478083	3.62	-11.2394	-4.29655	4.03425
61	214	61	76	154	68	0.549545	5.01	-12.7822	-0.069956	1.37305
62	214	62	157	193	131		4.21	-2.56386	9.68097	-3.99518
63	214	63	0	168	107	0.474726	4.65	1.87312	9.52307	-5.6451
64	214	64	75	124	89		4.8	2.25623	11.0796	-7.94851
65	214	65	76	154	68	0.59097	5.11	5.35845	4.99663	-9.57617
66	214	66	0	168	107	0.430471	4.81	2.24904	14.6332	-9.74493
67	214	67	157	193	131	0.424032	4.93	1.27437	8.86085	-4.48359
68	214	68	75	124	89	0.377387	4.31	11.5214	18.0321	-10.2434
69	214	69	0	168	107	0.463054	3.75	3.085	12.6555	-9.88856
70	214	70	138	154	91	0.500687	5.5	-6.13242	14.6069	2.67844
71	214	71	3	121	112	0.393135	5.04	2.00334	3.7437	5.79384
72	214	72	76	154	68	0.532663	5.25	-20.5581	-15.3492	13.0412
73	214	73	157	193	131	0.484151	4.92	7.54157	16.2872	-12.2774
74	214	74	0	168	107	0.42162	5.13	-9.8504	0.71337	0.772389
75	214	75	138	154	91	0.469237	4.15	11.2747	25.6425	-15.7982
76	214	76	75	124	89	0.459685	5.05	2.73445	6.45815	-6.50094
77	214	77	138	154	91	0.45519	4.31	3.60091	12.7233	-9.15599
78	214	78	0	168	107	0.444897	4.41	-9.44066	6.12539	-2.11215
79	214	79	3	121	112	0.350364	4.34	-2.74338	7.13296	1.99123
80	214	80	157	193	131	0.403925	4.88	-1.89068	-4.61885	1.44368
81	214	81	76	154	68	0.417416	3.56	-0.602882	-5.05214	-5.77089
82	214	82	3	121	112	0.460153	4.77	-8.10719	3.8681	3.56961
83	214	83	138	154	91	0.42977	4.76	-19.6093	-13.6192	12.9936
84	214	84	76	154	68	0.509269	4.23	0.316098	7.65943	2.3558
85	214	85	75	124	89	0.436845	4.54	9.82386	3.0318	-0.206808
86	214	86	138	154	91	0.394487	4.06	-1.94589	5.28349	-12.3276
87	214	87	75	124	89	0.482045	4.8	8.60239	10.2807	-6.73488
88	214	88	3	121	112	0.458626	4.26	0.745875	9.35655	-10.0544
89	214	89	0	168	107	0.569995	4.94	-1.18174	14.3235	-10.8803
90	214	90	76	154	68	0.43566	4.47	2.32417	12.8629	-4.73979
91	214	91	0	168	107	0.451194	4.08	8.89356	7.56436	-2.22555
92	214	92	76	154	68	0.428698	4.17	-2.90307	8.83471	1.87815
93	214	93	0	168	107	0.470393	4.93	3.09568	-3.37683	1.07877
94	214	94	75	124	89	0.382957	3.96	8.65375	26.4564	-12.9968
95	214	95	3	121	112	0.518378	3.57	8.29034	14.1375	-16.0263
96	214	96	138	154	91	0.492167	5.41	9.28978	19.8976	-9.55385
97	214	97	75	124	89	0.421559	3.83	13.0764	22.6544	-9.98776
98	214	98	75	124	89	0.467264	5.43	1.5956	6.92977	8.19505
99	214	99	0	168	107	0.414682	5.06	-6.96542	-0.254623	-4.15452
100	214	100	3	121	112	0.411338	3.57	-0.232363	-3.89646	-7.9561
101	214	101	76	154	68	0.422885	4.49	0.642236	11.9446	-3.84561
102	214	102	157	193	131	0.418579	4.59	0.428442	6.33745	0.288231
103	214	103	0	168	107	0.410109	3.97	-10.8891	1.89523	-5.23358
104	214	104	75	124	89	0.48368	3.69	3.34496	13.0537	-7.05054
105	214	105	138	154	91	0.399372	5.17	5.03739	13.9255	-2.69939
106	214	106	76	154	68	0.415818	4.79	-9.18536	3.44927	-1.44867
107	214	107	3	121	112	0.39932	3.9	4.45209	14.5679	-8.81761
108	214	108	3	121	112		3.78	1.69441	10.812	-7.82382
109	214	109	76	154	68		4.42	-8.14572	-3.87951	3.37561
110	214	110	76	154	68	0.432044	4.83	-6.12129	11.3437	-7.19637
111	214	111	76	154	68	0.44149	4.35	-8.26785	-1.61057	-5.3199
112	214	112	76	154	68	0.470155	4.16	-9.51084	-2.57213	-0.490295
113	214	113	157	193	131	0.463789	3.69	-4.16816	1.91406	2.12209
114	214	114	157	193	131	0.41125	3.56	-9.68687	-7.37749	8.92308
115	214	115	75	124	89	0.435017	4.38	1.55205	9.98077	5.90729
116	214	116	3	121	112	0.516581	5.09	2.37311	3.21621	0.696873
117	214	117	138	154	91	0.590086	3.54	6.16462	-1.05358	-3.3586
118	214	118	157	193	131		4.02	7.15449	8.97739	-15.4399
119	214	119	138	154	91	0.39041	4.21	6.92589	5.25396	-1.58271
0	215	0	3	121	112		4.64	0.686507	-10.0189	24.5716
1	215	1	138	154	91		3.64	15.6819	-6.61123	6.20609
2	215	2	0	168	107	0.438624	3.62	-1.72453	-15.2658	2.23013
3	215	3	157	193	131	0.354258	4.78	16.8062	24.7737	-14.494
4	215	4	157	193	131	0.383796	5.14	0.488418	-22.1904	4.36288
5	215	5	0	168	107	0.323371	3.76	4.13478	2.07867	-7.60188
6	215	6	157	193	131	0.373962	5.32	-6.40464	-22.384	-1.35038
7	215	7	75	124	89	0.395566	4.97	9.39066	4.32077	-7.90165
8	215	8	138	154	91		3.9	8.8436	4.89267	-3.04251
9	215	9	75	124	89	0.432712	3.99	2.0648	-23.0401	5.99177
10	215	10	0	168	107	0.340232	5.14	-5.07014	0.267861	2.41569
11	215	11	75	124	89	0.350821	5.23	-3.36426	-34.5384	18.2125
12	215	12	75	124	89	0.350301	3.82	15.6705	7.34019	-4.79566
13	215	13	138	154	91	0.349937	4.54	11.1394	10.811	-10.5072
14	215	14	0	168	107	0.347483	3.56	-1.03198	1.41204	0.741168
15	215	15	0	168	107	0.373137	4.5	-9.14721	-4.20569	3.80715
16	215	16	75	124	89	0.318784	4.91	-3.64207	-32.68	15.6592
17	215	17	138	154	91	0.371342	4.33	5.52434	36.4229	-4.40884
18	215	18	138	154	91	0.406816	5.31	1.24162	-10.4162	4.33754
19	215	19	76	154	68	0.418529	3.57	8.48638	3.66401	-0.943136
20	215	20	138	154	91	0.390152	5.07	11.6611	3.23463	-14.757
21	215	21	76	154	68	0.401671	4.73	4.15831	4.14692	-1.7506
22	215	22	3	121	112	0.33828	4.78	9.70445	8.97075	-3.15391
23	215	23	0	168	107	0.377714	4.63	-5.84161	-11.591	6.06632
24	215	24	3	121	112	0.345339	4.95	-5.81978	-6.24987	-2.18887
25	215	25	76	154	68	0.384885	4.56	7.27083	6.64851	-1.21327
26	215	26	75	124	89	0.382436	4.37	-1.78388	-1.75482	5.13237
27	215	27	75	124	89	0.369021	3.78	-1.50202	-2.08596	-4.11984
28	215	28	3	121	112	0.37863	4.88	15.1856	20.6604	-13.1804
29	215	29	75	124	89	0.3743	4.86	4.56958	-15.6582	2.5474
30	215	30	157	193	131	0.369835	5.2	5.71725	17.0646	-11.1015
31	215	31	138	154	91	0.419408	5.1	2.44676	-8.05937	-2.30307
32	215	32	0	168	107	0.382897	4.61	17.3341	20.2048	-11.3258
33	215	33	0	168	107	0.393501	4.9	5.86156	-5.60631	-4.17451
34	215	34	76	154	68		4.55	17.0513	22.4535	-10.9795
35	215	35	0	168	107	0.444524	4.22	0.845568	4.122	0.906749
36	215	36	3	121	112	0.35417	4.2	-3.92287	-1.82769	8.37789
37	215	37	76	154	68		3.85	12.1656	17.3467	-6.70146
38	215	38	138	154	91	0.382372	4.32	13.6579	3.1475	-7.06597
39	215	39	75	124	89	0.415957	4.41	0.72732	-23.9187	10.0094
40	215	40	76	154	68		4.06	-10.8104	3.80032	1.48184
41	215	41	138	154	91	0.385126	4.94	18.8222	15.6937	-14.1325
42	215	42	0	168	107	0.406631	3.9	-0.232488	-15.8927	2.05079
43	215	43	3	121	112	0.420269	4.63	3.89198	1.43218	-0.60082
44	215	44	157	193	131	0.43686	5.07	-8.50639	-5.18343	4.41635
45	215	45	157	193	131	0.398511	3.98	-2.9049	1.38642	-3.62798
46	215	46	157	193	131	0.396092	4.43	3.66929	3.33867	-1.43143
47	215	47	3	121	112	0.359694	4.56	5.73605	-5.53819	-5.27856
48	215	48	76	154	68	0.371214	4.9	-1.22796	1.25942	-6.33699
49	215	49	0	168	107	0.404709	4.37	-7.14584	-2.65467	5.89096
50	215	50	157	193	131		4.26	8.91655	17.8783	-5.19807
51	215	51	0	168	107		4.81	10.4931	17.1649	-5.11175
52	215	52	0	168	107	0.416472	4.11	-1.1577	-12.1314	4.70026
53	215	53	138	154	91	0.454152	5.29	1.08549	-13.8	4.8522
54	215	54	3	121	112	0.401571	3.8	2.59401	2.73884	-7.66684
55	215	55	157	193	131	0.438262	5.12	14.048	12.3651	-10.6407
56	215	56	157	193	131	0.417825	4.85	0.435918	4.88128	1.59667
57	215	57	75	124	89	0.395435	3.59	-1.8469	12.0912	-5.87786
58	215	58	76	154	68	0.427097	4.44	-1.37159	11.5213	-1.10584
59	215	59	76	154	68	0.416652	5.25	-0.596295	6.91301	-4.71356
60	215	60	138	154	91		3.64	16.2304	2.40727	5.74862
61	215	61	0	168	107		3.79	9.56551	8.08881	-7.27692
62	215	62	76	154	68	0.410385	4.96	6.94673	7.24125	-1.85285
63	215	63	157	193	131	0.455948	4.1	-7.95752	-7.20971	1.51308
64	215	64	3	121	112	0.407528	5.46	-0.207411	8.07421	-9.07523
65	215	65	157	193	131	0.381047	4.05	-3.98954	-2.98133	6.96438
66	215	66	3	121	112	0.442628	3.84	3.47994	16.5601	-3.3596
67	215	67	157	193	131		4.65	12.75	8.1447	0.603719
68	215	68	76	154	68	0.442873	4.43	-1.66655	-21.5003	6.71849
69	215	69	75	124	89	0.424455	3.86	-1.7045	-8.31718	0.799761
70	215	70	76	154	68	0.404044	5.4	3.549	4.7934	-10.7868
71	215	71	76	154	68	0.385683	4.85	3.42809	3.47131	1.08336
72	215	72	76	154	68	0.410209	4.77	-3.89708	-13.6865	4.81241
73	215	73	3	121	112	0.39374	4.55	-5.39185	-5.49391	3.01202
74	215	74	75	124	89	0.395348	5.15	-0.0263245	2.09574	6.98306
75	215	75	76	154	68	0.454836	4.51	-0.339785	1.80939	-4.90828
76	215	76	76	154	68		4.66	4.12137	-10.754	4.82029
77	215	77	138	154	91		4.78	7.05246	7.3073	-3.05058
78	215	78	0	168	107	0.420532	4.97	-12.4597	-7.20816	-7.75123
79	215	79	138	154	91	0.362049	4.5	9.35045	-7.99102	-10.8224
80	215	80	0	168	107	0.42156	5.37	5.89671	8.28595	-11.8463
81	215	81	138	154	91	0.435221	3.53	2.24494	19.1444	5.03971
82	215	82	3	121	112	0.434742	5.11	-2.83771	-8.87338	15.1399
83	215	83	138	154	91	0.357364	5.15	6.87646	-3.62734	9.21532
84	215	84	3	121	112	0.376921	3.59	-5.41526	-5.16195	8.84712
85	215	85	75	124	89		4.76	15.0693	11.1032	-2.24207
86	215	86	75	124	89	0.392087	5.45	0.298708	-11.1387	7.13924
87	215	87	157	193	131	0.381535	4.14	-5.9936	-35.1729	15.674
88	215	88	138	154	91		4.97	1.1075	-19.5825	-6.39969
89	215	89	157	193	131	0.453703	4.9	3.12272	15.1857	-21.3249
90	215	90	157	193	131	0.39722	3.87	5.03241	16.0937	-21.0685
91	215	91	75	124	89		4.32	2.05595	2.24279	-7.67392
92	215	92	0	168	107	0.444463	4.21	12.0626	29.3332	-13.9092
93	215	93	0	168	107	0.392068	4.47	-7.28781	-11.8697	5.65751
94	215	94	0	168	107	0.404673	3.99	4.18258	26.1128	-4.06707
95	215	95	157	193	131	0.408262	4.67	-14.3037	-25.7269	43.2978
96	215	96	138	154	91	0.377858	4.16	-4.81575	7.42423	5.60154
97	215	97	157	193	131	0.373364	4.3	-7.02473	-4.28379	7.75406
98	215	98	138	154	91	0.387091	5.36	5.88971	10.54	-4.75911
99	215	99	75	124	89	0.432606	4.9	18.8479	3.24386	-11.6612
100	215	100	3	121	112	0.381165	4.31	2.99972	-0.134457	-10.4806
101	215	101	157	193	131	0.39079	3.97	1.31126	12.3725	-14.4052
102	215	102	75	124	89	0.448346	4.87	-14.4338	-3.67641	-4.72847
103	215	103	76	154	68		4.63	5.29606	9.44744	-16.0767
104	215	104	76	154	68	0.457465	3.7	28.0973	28.2486	-24.7907
105	215	105	3	121	112	0.415106	3.96	1.11183	-7.5113	4.15677
106	215	106	75	124	89		4.56	12.6272	36.3738	-1.2617
107	215	107	138	154	91	0.395246	4.68	4.02518	-19.0996	20.6306
108	215	108	3	121	112	0.388814	4.48	7.30136	0.654124	-0.294612
109	215	109	76	154	68	0.430367	4.11	-0.0436238	-10.0724	-0.987938
110	215	110	0	168	107	0.453984	3.57	-2.5808	-14.1413	-2.54595
111	215	111	75	124	89		3.59	22.0029	33.9576	-14.9525
112	215	112	3	121	112		5.22	-2.23168	-8.02619	13.8455
113	215	113	3	121	112		4.75	5.8417	-4.87859	0.516738
114	215	114	3	121	112	0.421458	4.42	5.00372	0.957564	-6.72649
115	215	115	3	121	112		5.2	-5.11571	-12.3245	0.695318
116	215	116	138	154	91	0.430535	4.62	-0.352337	-5.31907	-3.5199
117	215	117	157	193	131	0.409017	3.74	-4.78298	11.2686	-4.97922
118	215	118	75	124	89	0.442761	4.38	-9.58717	5.89071	7.30899
119	215	119	76	154	68	0.404244	3.61	6.78369	1.74911	-2.51948
0	216	0	3	121	112		4.71	7.1105	27.7742	17.4818
1	216	1	76	154	68		4.19	1.34365	18.8521	11.462
2	216	2	75	124	89		4.77	26.0612	-16.1395	28.0437
3	216	3	157	193	131		5.35	-19.7496	-48.591	13.5878
4	216	4	76	154	68		4.02	8.69258	8.55204	-41.8876
5	216	5	75	124	89		3.72	8.58895	10.175	-34.001
6	216	6	3	121	112		5.3	31.9861	23.0451	-14.9136
7	216	7	75	124	89		4.98	9.67982	3.68736	1.30372
8	216	8	0	168	107		3.65	6.07191	3.15741	0.7302
9	216	9	157	193	131		5	6.92374	13.953	-12.7838
10	216	10	76	154	68		4.41	5.27565	1.747	0.50368
11	216	11	3	121	112		3.65	22.0247	14.9171	-10.7469
12	216	12	138	154	91		4.71	1.5656	0.577295	0.90053
13	216	13	0	168	107		4.61	29.0999	7.1593	0.932075
14	216	14	3	121	112		4.57	7.82841	-1.73978	-3.75387
15	216	15	138	154	91		4.94	5.21692	13.355	-8.11798
16	216	16	0	168	107		4.06	8.52135	19.5883	-5.92427
17	216	17	75	124	89		4.86	18.015	-4.18444	-6.13177
18	216	18	76	154	68		3.71	-9.89445	-4.65145	4.46183
19	216	19	3	121	112		5.31	1.31106	2.00627	-3.07824
20	216	20	138	154	91		4.05	19.8051	4.05688	-4.45688
21	216	21	76	154	68		3.58	-0.170819	20.3487	-4.90387
22	216	22	0	168	107		4.29	5.20743	-1.39676	-6.68726
23	216	23	3	121	112		4.24	-1.41225	3.17178	-0.722716
24	216	24	138	154	91		3.96	6.25553	16.2264	-13.2724
25	216	25	138	154	91		4.41	13.126	-5.29912	-5.00134
26	216	26	76	154	68		4.5	-11.9988	4.13516	0.50017
27	216	27	0	168	107		4.19	5.29339	1.08834	-5.05198
28	216	28	3	121	112		4.27	2.73251	-0.148924	3.86475
29	216	29	3	121	112		4.65	-2.06482	5.2134	-1.6579
30	216	30	75	124	89		3.55	13.8965	5.04998	-0.949191
31	216	31	76	154	68		5.19	2.88615	-6.54176	6.9593
32	216	32	76	154	68		3.62	7.64945	12.6934	-8.67715
33	216	33	157	193	131		4.57	0.805103	0.307071	-4.44744
34	216	34	75	124	89		3.67	5.81868	5.39047	-7.51135
35	216	35	157	193	131		4.57	-6.54489	1.60352	1.46159
36	216	36	157	193	131		3.81	-1.14307	8.06827	1.94756
37	216	37	157	193	131		4.98	-8.13689	-4.00565	0.809203
38	216	38	157	193	131		3.75	-1.67843	-0.797382	1.03587
39	216	39	75	124	89		4	-8.03786	-5.61997	3.56043
40	216	40	0	168	107		5.32	-0.540691	5.87576	-7.23956
41	216	41	138	154	91		4.65	4.51979	8.21129	-5.54518
42	216	42	157	193	131		4.54	0.188636	10.0679	-5.78825
43	216	43	3	121	112		4.46	26.0827	7.43075	0.767133
44	216	44	0	168	107		4.56	6.12399	-4.73864	4.7123
45	216	45	157	193	131		3.87	1.42487	-5.22462	5.5329
46	216	46	3	121	112		4.87	22.9829	-8.0618	-6.85859
47	216	47	0	168	107		4.66	5.77248	-7.51397	-4.87051
48	216	48	3	121	112		5.44	14.6706	0.378529	-13.4808
49	216	49	0	168	107		3.86	-2.41155	-3.36088	1.13746
50	216	50	3	121	112		4.39	26.8236	18.8198	-5.97405
51	216	51	75	124	89		3.73	8.06487	6.80058	5.3347
52	216	52	138	154	91		5.13	-4.34646	-9.5195	7.96662
53	216	53	76	154	68		5.06	-2.70709	-5.48593	-3.79458
54	216	54	138	154	91		3.53	-4.82249	-6.00478	-1.91079
55	216	55	76	154	68		4.05	-5.25076	1.52677	3.57544
56	216	56	76	154	68		4.89	-5.52247	-1.76177	-8.02514
57	216	57	75	124	89		4.62	-1.58613	-11.6787	6.62056
58	216	58	3	121	112		3.72	17.2181	18.5518	-6.4687
59	216	59	3	121	112		4.69	5.7578	9.68231	-2.75836
60	216	60	75	124	89		4.67	16.5017	-1.28036	1.49546
61	216	61	157	193	131		4.09	-12.2338	-4.06784	12.2379
62	216	62	75	124	89		5.05	-2.61258	1.1323	-1.45373
63	216	63	138	154	91		5.5	-0.168893	-9.32411	1.13864
64	216	64	75	124	89		4.06	-4.85966	-9.85248	3.2251
65	216	65	0	168	107		4.88	-10.8963	2.79581	-14.1417
66	216	66	0	168	107		3.81	-0.484174	2.72734	-19.9124
67	216	67	0	168	107		5.21	11.511	16.5636	-25.5452
68	216	68	76	154	68		3.76	-5.7776	7.14329	12.0751
69	216	69	138	154	91		4.52	-7.45919	-31.3773	30.6014
70	216	70	76	154	68		3.51	1.38208	13.6503	-9.13543
71	216	71	157	193	131		4.39	-3.96859	-7.43958	8.29745
72	216	72	75	124	89		5.04	2.91782	3.98914	16.5128
73	216	73	157	193	131		4.02	-3.74061	6.51642	0.884458
74	216	74	157	193	131		4.11	-21.044	-20.678	16.055
75	216	75	0	168	107		4.67	3.123	9.87282	-8.7728
76	216	76	76	154	68		3.76	-2.9448	6.72618	-5.41398
77	216	77	157	193	131		5.21	-2.42681	15.5828	-14.0521
78	216	78	157	193	131		4.94	-3.63451	-1.35533	-2.85257
79	216	79	76	154	68		4.53	-9.96694	-5.1575	3.49586
80	216	80	138	154	91		3.56	-10.3728	10.9205	0.173561
81	216	81	0	168	107		4.88	5.63508	18.8465	-11.9155
82	216	82	0	168	107		5.08	-3.93204	-7.55887	3.61149
83	216	83	138	154	91		5.06	1.05747	19.068	-12.3746
84	216	84	0	168	107		4.2	-3.07156	4.88978	2.69491
85	216	85	157	193	131		5.48	18.6172	25.2823	-0.233834
86	216	86	75	124	89		5.16	2.32047	-8.63753	-1.49011
87	216	87	157	193	131		3.57	-0.164876	15.3666	-12.3119
88	216	88	76	154	68		5.49	-0.170227	10.4477	-3.17663
89	216	89	0	168	107		4.27	-10.7665	-18.0908	11.2422
90	216	90	138	154	91		4.21	-10.8395	-7.24641	1.86351
91	216	91	76	154	68		4.72	4.27429	3.37885	-14.0554
92	216	92	138	154	91		4	-2.26095	-5.27665	3.34967
93	216	93	76	154	68		4.39	-9.39036	-0.613016	-6.8159
94	216	94	75	124	89		3.69	14.34	19.0836	-11.0161
95	216	95	157	193	131		3.89	-4.47642	-5.41279	12.9169
96	216	96	76	154	68		3.56	4.07765	-23.4264	23.2074
97	216	97	75	124	89		4.43	2.49404	-5.03951	5.93688
98	216	98	75	124	89		3.9	2.54024	5.68183	-9.10116
99	216	99	0	168	107		4.25	-16.3002	-6.54613	0.929937
100	216	100	3	121	112		3.84	8.32915	2.37883	-10.7171
101	216	101	138	154	91		4.76	-3.38194	-5.67897	0.22861
102	216	102	157	193	131		4.88	0.878661	-4.53085	-13.0653
103	216	103	3	121	112		5.29	8.02403	14.9725	-25.5119
104	216	104	3	121	112		4.42	-1.42958	5.93356	16.3428
105	216	105	3	121	112		3.66	4.21585	1.48669	17.2191
106	216	106	0	168	107		4.44	5.42982	-10.1416	12.0283
107	216	107	0	168	107		3.83	-18.0383	-16.8628	8.79525
108	216	108	75	124	89		3.58	11.9212	16.0323	-9.13817
109	216	109	75	124	89		4.13	1.50377	7.19585	-14.8641
110	216	110	3	121	112		4.73	-9.54877	-11.88	6.79621
111	216	111	138	154	91		3.73	11.9824	19.9197	-6.69522
112	216	112	76	154	68		5.44	-0.354829	-4.65404	2.04422
113	216	113	157	193	131		4.1	-4.15779	-1.77193	-1.22964
114	216	114	75	124	89		5.1	-6.32964	-16.4478	7.9721
115	216	115	138	154	91		3.99	-13.3413	-9.28153	8.32565
116	216	116	138	154	91		4.46	-12.1731	-5.04499	1.60388
117	216	117	138	154	91		4.12	0.127726	14.2699	-4.12285
118	216	118	3	121	112		4.19	8.68831	19.6317	-7.52771
119	216	119	138	154	91		3.91	-14.722	-8.01568	0.804811
0	217	0	138	154	91		4.86	-7.23621	6.24459	-14.0362
1	217	1	76	154	68	0.340596	4.2	-2.65405	3.76478	-8.93269
2	217	2	75	124	89	0.394164	3.63	-0.21145	-7.0915	8.93363
3	217	3	75	124	89	0.633615	3.52	-5.62514	0.787357	16.2439
4	217	4	3	121	112	0.604297	4.21	-9.80353	-5.3813	31.7041
5	217	5	3	121	112	0.469944	4.96	-9.72704	-7.13755	0.874963
6	217	6	75	124	89	0.535445	4.96	-1.95268	-5.81391	-13.4428
7	217	7	76	154	68	0.317053	3.87	-2.24772	8.62323	-2.71789
8	217	8	157	193	131	0.394705	5.29	-19.2127	-4.56879	10.2423
9	217	9	3	121	112	0.411182	4.95	10.0235	18.8916	-10.5787
10	217	10	157	193	131	0.328689	5.33	-7.45096	13.7635	-6.72452
11	217	11	3	121	112	0.360217	4.84	18.1085	5.61928	-5.40356
12	217	12	157	193	131	0.449624	4.09	6.27	23.567	-7.92678
13	217	13	3	121	112	0.395213	4.35	-12.1882	-22.9813	19.6246
14	217	14	76	154	68	0.398937	3.93	1.40694	-4.18019	5.54808
15	217	15	76	154	68	0.399496	5.49	-10.1009	-9.79997	-2.98514
16	217	16	76	154	68	0.360957	4.14	-2.2348	8.93126	-5.70379
17	217	17	3	121	112	0.434533	5.23	4.0394	8.69427	-11.1658
18	217	18	138	154	91	0.437959	4.93	-5.75675	-8.06567	-6.32106
19	217	19	3	121	112	0.409586	3.76	0.498224	9.38689	-18.5631
20	217	20	138	154	91	0.458106	5.13	23.9541	37.9172	-6.02578
21	217	21	138	154	91	0.445603	4.83	2.93809	-0.757553	31.6319
22	217	22	0	168	107	0.341201	3.55	-10.1032	-5.14556	14.5904
23	217	23	3	121	112	0.374784	3.73	5.09026	3.056	-0.67383
24	217	24	0	168	107	0.364357	5.46	-10.4502	7.01497	-9.05333
25	217	25	75	124	89	0.43174	5.22	1.33468	-3.1668	-7.41438
26	217	26	138	154	91	0.388368	3.65	-4.68299	4.57582	-6.76025
27	217	27	76	154	68	0.503975	3.55	8.00261	40.9267	-16.8799
28	217	28	76	154	68	0.463615	3.73	-7.24965	-0.700825	10.1804
29	217	29	75	124	89	0.455237	4.81	-8.29874	-21.2439	16.8185
30	217	30	76	154	68	0.436808	4.64	5.37533	50.2133	-18.4528
31	217	31	0	168	107	0.450205	4.84	-9.58798	-6.51461	23.825
32	217	32	76	154	68	0.492671	3.94	0.292431	4.09117	-8.66713
33	217	33	157	193	131	0.456439	5.37	8.52698	20.6553	-0.849659
34	217	34	157	193	131	0.537908	4.18	-20.6888	-26.0037	10.1808
35	217	35	157	193	131	0.351483	4.7	-12.6027	-18.9517	-17.8115
36	217	36	157	193	131	0.417004	4.83	-2.25774	-1.24047	-17.1946
37	217	37	3	121	112	0.487562	5.3	-6.96581	-1.14279	-10.9538
38	217	38	138	154	91	0.431055	5.22	-5.53794	-19.9939	-2.35218
39	217	39	75	124	89		5.34	63.1325	66.7848	-28.3593
40	217	40	76	154	68		4.1	-1.15075	-0.673285	36.4284
41	217	41	75	124	89	0.629492	3.71	5.15883	38.1696	8.56803
42	217	42	3	121	112	0.373131	5.12	-15.2212	-21.1898	9.78915
43	217	43	138	154	91	0.403833	4.09	-7.76457	-10.9488	-0.914499
44	217	44	3	121	112	0.391365	3.63	17.6306	3.70587	-3.90847
45	217	45	3	121	112	0.406971	3.78	-6.01716	-19.4088	7.44551
46	217	46	138	154	91	0.324478	4.71	-0.0815834	-7.60655	-19.9294
47	217	47	0	168	107	0.340053	3.65	-4.14766	-2.55463	-37.6724
48	217	48	75	124	89	0.611641	5.16	29.7553	26.4553	-1.12753
49	217	49	75	124	89	0.398113	5.37	-17.0399	-20.0904	26.0321
50	217	50	0	168	107	0.465704	3.5	-1.28278	7.30843	-17.4526
51	217	51	75	124	89	0.535212	4.77	13.674	8.51701	-13.7134
52	217	52	138	154	91	0.47083	3.92	3.88069	6.35702	-0.141111
53	217	53	157	193	131	0.534432	5.23	-9.10854	-3.97526	-3.06596
54	217	54	0	168	107	0.478786	4.33	-4.26356	2.39207	-6.44945
55	217	55	138	154	91	0.486367	4.23	5.87251	39.4448	-23.8273
56	217	56	0	168	107	0.488097	4.41	-6.34037	-1.82835	-7.47853
57	217	57	157	193	131	0.327629	4.11	17.4502	48.6487	-18.8998
58	217	58	0	168	107	0.461226	5.37	-7.85778	-18.1914	29.6713
59	217	59	75	124	89	0.394585	5.17	-9.14452	2.97184	-10.8816
60	217	60	75	124	89	0.509223	3.98	15.2207	2.69313	32.7097
61	217	61	76	154	68	0.35467	4.59	-38.3232	-26.2274	13.8404
62	217	62	157	193	131	0.458476	4.88	9.06314	19.8962	-30.3541
63	217	63	3	121	112	0.443956	5.03	25.9171	36.684	-7.57887
64	217	64	0	168	107	0.419506	4.25	-19.8857	-23.4935	46.1072
65	217	65	76	154	68	0.410059	5.06	-0.13069	-0.429205	-7.00862
66	217	66	0	168	107	0.381573	4.5	-13.2665	-0.104019	-20.089
67	217	67	157	193	131	0.575035	5.29	6.71642	25.4628	-5.72452
68	217	68	157	193	131	0.492535	3.63	-13.5839	5.65508	8.07585
69	217	69	75	124	89	0.504185	5.35	-5.55539	-2.61314	-24.2424
70	217	70	157	193	131	0.431523	4.59	-1.51341	-0.480296	30.6077
71	217	71	0	168	107	0.614162	3.72	0.965824	-11.7751	11.9358
72	217	72	0	168	107	0.441821	4.91	-12.7855	4.94979	2.30513
73	217	73	76	154	68	0.339278	4.6	-10.7217	-0.252186	-1.94931
74	217	74	76	154	68	0.458759	4.96	5.58568	9.55571	-25.505
75	217	75	3	121	112	0.422422	4.48	13.8575	37.2449	-18.4687
76	217	76	157	193	131	0.468852	4.88	-11.5667	-11.7503	13.6554
77	217	77	76	154	68	0.550474	4.49	0.181717	17.2717	1.57384
78	217	78	157	193	131	0.409989	4.39	-5.7534	0.183348	17.4436
79	217	79	157	193	131	0.503448	3.65	-9.84851	6.18654	-1.79809
80	217	80	75	124	89	0.493278	5.06	8.12931	-12.0875	27.5901
81	217	81	3	121	112	0.396773	3.82	1.62157	9.09314	-21.6322
82	217	82	157	193	131		3.81	-3.1148	8.9199	-17.2346
83	217	83	138	154	91	0.415043	4.5	15.3759	2.62466	-19.4152
84	217	84	3	121	112	0.468535	4.82	20.0756	30.5283	-26.2837
85	217	85	0	168	107	0.326053	4.11	-0.894705	11.2328	11.3421
86	217	86	138	154	91	0.521459	4.47	11.0627	23.6496	-17.5091
87	217	87	0	168	107	0.351083	3.82	-16.5818	-25.8979	36.8765
88	217	88	76	154	68	0.517703	3.59	1.14843	-4.82267	0.970069
89	217	89	157	193	131	0.381327	5.38	-12.2871	9.7271	-0.14679
90	217	90	0	168	107	0.510879	4.42	-8.78441	18.1707	3.28304
91	217	91	138	154	91	0.464366	5.26	-19.1395	-34.2127	16.4984
92	217	92	75	124	89	0.331926	5.08	24.1217	5.84799	-11.398
93	217	93	0	168	107	0.461631	4.86	21.1314	2.8872	-7.20609
94	217	94	0	168	107	0.381962	5.25	-3.14503	-0.384226	-6.91556
95	217	95	75	124	89	0.37739	4.26	-4.88492	5.12463	-3.00291
96	217	96	75	124	89	0.450919	5.39	-17.4624	-34.6405	18.6727
97	217	97	75	124	89	0.510597	4.56	11.499	10.6194	25.4165
98	217	98	75	124	89	0.517959	3.79	-3.14487	5.54781	-8.37386
99	217	99	138	154	91	0.598762	4.85	-13.3307	-11.5373	21.6071
100	217	100	138	154	91	0.488132	4.82	11.7717	2.97501	-25.1768
101	217	101	75	124	89	0.529757	4.28	-1.06525	48.9572	-26.531
102	217	102	0	168	107	0.539275	5.08	-5.4028	-11.6069	5.82188
103	217	103	138	154	91	0.436771	4.8	14.1097	59.1464	-44.6832
104	217	104	3	121	112	0.479329	4.75	29.354	45.1329	-24.1463
105	217	105	138	154	91	0.390882	4.09	1.20556	4.26963	-2.85826
106	217	106	76	154	68	0.522523	4.49	9.06187	44.7311	3.87384
107	217	107	157	193	131	0.413972	5.01	-30.0636	-30.4943	53.2821
108	217	108	3	121	112	0.485405	5.17	3.29058	-19.6371	20.1676
109	217	109	3	121	112	0.397028	3.81	-8.73201	-32.6076	16.1901
110	217	110	157	193	131	0.455593	3.88	-18.0892	-15.794	-31.6107
111	217	111	76	154	68	0.519214	3.99	-6.1062	15.4674	-25.547
112	217	112	138	154	91	0.490693	4.02	5.71117	-6.73286	9.04844
113	217	113	0	168	107	0.626461	3.55	-24.5826	-13.8597	-24.2754
114	217	114	0	168	107	0.488009	4.95	33.3104	43.1605	-52.4028
115	217	115	138	154	91	0.505599	3.62	-24.7414	-37.1933	12.716
116	217	116	3	121	112		5.06	-13.0677	58.6114	-35.1898
117	217	117	76	154	68	0.563762	5.28	15.7135	53.1068	1.51759
118	217	118	76	154	68	0.465126	3.87	-13.2915	-41.3057	37.4584
119	217	119	138	154	91	0.500654	5.26	-2.71087	7.46369	-8.43404
0	218	0	75	124	89	0.466686	4.9	28.6851	14.4465	-18.3099
1	218	1	75	124	89	0.376233	4.36	11.3451	-2.48837	-7.54278
2	218	2	76	154	68	0.385689	3.53	25.7755	39.6874	-19.8487
3	218	3	75	124	89	0.444173	3.9	-1.57511	-18.7932	15.1259
4	218	4	157	193	131	0.403849	4.31	-11.0893	-12.5938	-10.0043
5	218	5	75	124	89	0.381376	4.35	8.83528	-3.59632	-8.98763
6	218	6	75	124	89	0.370929	3.71	13.7262	7.34064	6.45624
7	218	7	76	154	68	0.388473	3.69	1.12351	-24.8112	15.193
8	218	8	76	154	68	0.436116	4.31	7.74956	2.88271	-17.7419
9	218	9	138	154	91	0.44868	3.82	-5.04296	-4.33126	5.10914
10	218	10	138	154	91	0.378249	4.73	10.9678	-2.8117	-0.640058
11	218	11	0	168	107	0.397664	4.61	-14.4758	-5.85804	3.00413
12	218	12	3	121	112	0.411356	4.84	9.96729	-7.23754	5.15577
13	218	13	138	154	91	0.338769	4.58	-11.5657	-23.1786	12.7446
14	218	14	75	124	89	0.360331	3.59	18.8124	-6.01938	-3.48831
15	218	15	75	124	89	0.398945	5.33	9.93059	-11.9378	14.3432
16	218	16	3	121	112	0.386452	3.95	-0.985621	-14.7357	0.109297
17	218	17	76	154	68	0.51185	5.06	9.69221	8.66817	-12.6312
18	218	18	76	154	68	0.395562	4.57	6.31562	34.0363	1.21609
19	218	19	0	168	107	0.438854	5.4	11.9363	-1.01316	0.38234
20	218	20	138	154	91	0.395479	3.62	8.60679	11.1287	-1.15973
21	218	21	3	121	112	0.45098	4.16	2.0253	4.48674	2.05693
22	218	22	138	154	91	0.48458	3.71	-0.566187	13.1594	-1.22338
23	218	23	0	168	107	0.434141	4.22	16.9199	-1.64306	-13.9053
24	218	24	157	193	131	0.391702	3.95	9.99364	9.91434	-16.9639
25	218	25	0	168	107	0.417307	4.1	-5.72762	8.66036	5.11988
26	218	26	75	124	89	0.409864	4.24	5.50808	-2.93021	-5.34314
27	218	27	76	154	68	0.399389	4.83	6.77764	-5.03211	-2.27529
28	218	28	0	168	107	0.484893	4.55	-3.71367	14.6164	-0.401499
29	218	29	3	121	112	0.540406	5.45	-4.33239	-8.19152	7.40703
30	218	30	0	168	107	0.371871	4.34	-6.53386	-12.3574	7.14866
31	218	31	76	154	68	0.390445	3.86	-12.5451	-2.0014	-3.36081
32	218	32	138	154	91	0.394094	4.78	23.4558	44.8775	-21.3964
33	218	33	3	121	112	0.555454	5.26	-2.95509	-18.3475	9.3422
34	218	34	75	124	89	0.546884	4.86	3.61724	8.85236	-2.17988
35	218	35	76	154	68	0.442529	3.74	-19.592	-13.676	12.1201
36	218	36	75	124	89	0.402182	4.67	1.93572	9.09034	-11.6177
37	218	37	3	121	112	0.348686	4.57	10.1689	-5.3802	-6.94055
38	218	38	0	168	107	0.384168	4.99	-5.01587	17.1377	-5.27655
39	218	39	75	124	89	0.357668	4.16	3.92722	-7.81151	1.61237
40	218	40	75	124	89	0.449191	4.09	-7.28857	1.91655	-7.27238
41	218	41	3	121	112	0.396764	3.62	16.8808	15.9646	-9.01616
42	218	42	138	154	91	0.455365	5.07	3.3737	11.3736	-0.866449
43	218	43	157	193	131	0.4667	5.34	1.7306	5.28078	5.43811
44	218	44	3	121	112	0.462181	4.9	-9.01448	-1.23857	7.4704
45	218	45	3	121	112	0.509864	5.27	14.0059	5.18931	-0.9786
46	218	46	157	193	131	0.375296	5.48	-0.117315	-3.64683	-6.815
47	218	47	75	124	89	0.385738	4.82	18.4436	20.4341	-20.8566
48	218	48	0	168	107	0.397302	4.74	-3.69234	-3.73687	-8.98217
49	218	49	75	124	89	0.480815	3.87	-6.67068	3.67997	1.26536
50	218	50	76	154	68	0.408466	5.06	-0.930555	-4.1524	0.00859198
51	218	51	3	121	112	0.353966	3.94	10.2471	-4.07474	-5.12696
52	218	52	76	154	68	0.435319	3.74	6.66435	6.19587	-0.10363
53	218	53	157	193	131	0.388129	5.17	-11.3766	5.42417	5.86273
54	218	54	75	124	89	0.3734	4.73	-0.85104	-2.86129	-3.37553
55	218	55	157	193	131	0.405031	4.24	-7.63216	2.86031	22.4758
56	218	56	76	154	68	0.394589	5.22	-27.1637	-19.0287	17.4376
57	218	57	3	121	112	0.470107	5.18	1.26068	-2.66845	-20.7242
58	218	58	138	154	91	0.384559	3.79	-12.0883	13.6483	2.45802
59	218	59	138	154	91	0.600087	5.41	-18.2055	-24.3542	28.09
60	218	60	157	193	131	0.409591	3.62	-11.2219	-10.2335	-5.06417
61	218	61	157	193	131	0.415053	4.16	-2.82836	8.79947	2.62885
62	218	62	157	193	131	0.502725	4.29	-0.964379	-1.78591	5.43352
63	218	63	138	154	91	0.411239	4.14	3.74365	0.765884	-12.5711
64	218	64	3	121	112	0.34885	3.98	-7.67808	16.1431	-19.6808
65	218	65	157	193	131	0.43447	5.33	1.15572	-11.7953	-8.72788
66	218	66	3	121	112	0.449958	4.92	-0.431902	27.3688	5.72081
67	218	67	3	121	112	0.43728	4.72	-19.0318	-20.8821	24.6831
68	218	68	138	154	91	0.535035	4.28	18.1576	15.7533	-12.9201
69	218	69	75	124	89	0.431531	4.05	-3.55595	1.21644	-9.03398
70	218	70	138	154	91	0.406979	4.57	11.8275	27.1003	-2.55964
71	218	71	138	154	91	0.360614	3.96	-16.3202	-29.9432	11.4405
72	218	72	3	121	112	0.666121	5.02	3.63208	1.32494	-3.55536
73	218	73	138	154	91	0.747506	4.63	16.1416	33.8537	-6.49057
74	218	74	76	154	68	0.413926	5.16	1.87618	3.68826	0.0486174
75	218	75	76	154	68	0.36967	3.75	-7.45066	-2.77973	-1.10357
76	218	76	75	124	89	0.589201	3.86	6.31412	-6.87138	-4.96619
77	218	77	76	154	68	0.452695	4.92	3.11051	8.43925	-12.7693
78	218	78	0	168	107	0.446365	4.76	-4.13787	-16.6145	12.5725
79	218	79	0	168	107	0.479819	3.51	7.67448	9.0015	-8.3158
80	218	80	3	121	112	0.42832	5.17	9.88858	30.9105	-3.11739
81	218	81	76	154	68	0.429862	3.53	-8.54263	0.159689	18.4333
82	218	82	0	168	107	0.39354	4.01	-10.0454	-10.6042	13.2244
83	218	83	3	121	112	0.463142	5.38	-2.36195	-13.2982	4.14865
84	218	84	138	154	91	0.382731	4.55	14.416	14.7644	-13.7164
85	218	85	0	168	107	0.461205	3.9	1.41585	-3.9889	0.221681
86	218	86	76	154	68	0.46076	3.86	4.35319	17.852	-7.78899
87	218	87	75	124	89	0.400333	3.74	0.0228687	9.41147	-11.8198
88	218	88	76	154	68	0.470024	3.62	2.54581	-10.89	-0.237743
89	218	89	0	168	107	0.437499	5.43	-1.15807	1.91619	-15.2293
90	218	90	0	168	107	0.358939	3.97	19.7185	46.1404	9.23202
91	218	91	138	154	91	0.409464	4.46	-4.44037	-22.0484	29.1178
92	218	92	138	154	91	0.397006	5.42	-1.46448	-10.513	8.23401
93	218	93	0	168	107	0.410405	4.84	4.44342	-1.20386	-5.50484
94	218	94	3	121	112	0.354014	4.91	10.8459	3.78065	-8.26437
95	218	95	3	121	112	0.455477	5.37	18.3836	47.4667	-15.1947
96	218	96	157	193	131	0.370076	4.43	12.2666	-7.08339	-11.412
97	218	97	0	168	107	0.385504	3.71	-3.08084	0.491746	-13.6871
98	218	98	0	168	107	0.484961	3.8	-2.00844	-13.8593	13.6934
99	218	99	157	193	131	0.476579	3.92	10.5657	8.91347	17.4512
100	218	100	157	193	131	0.422287	5.41	-1.54776	-7.05455	7.88276
101	218	101	76	154	68	0.369773	4.46	2.38188	-1.48299	-22.8651
102	218	102	75	124	89	0.458189	4.67	8.9033	-25.1205	0.837994
103	218	103	157	193	131	0.38992	5.25	29.0229	49.7236	-30.0936
104	218	104	0	168	107	0.419333	3.62	-12.3113	-2.79196	-5.16577
105	218	105	3	121	112	0.484909	5.47	5.79394	-3.78912	14.0153
106	218	106	157	193	131	0.592149	4.01	-10.0745	1.09159	25.0263
107	218	107	0	168	107	0.466895	3.83	-18.579	-15.085	3.95283
108	218	108	76	154	68	0.422455	3.61	9.76413	27.046	3.58469
109	218	109	157	193	131	0.43805	5.22	5.0828	25.6234	11.3672
110	218	110	138	154	91	0.415575	3.51	-11.8602	3.2403	-3.78828
111	218	111	157	193	131	0.415191	4.76	-12.4056	-17.0876	-7.52087
112	218	112	138	154	91	0.392698	3.62	-2.90706	4.11093	-12.3143
113	218	113	157	193	131	0.463172	3.74	2.68528	-8.32931	2.25977
114	218	114	75	124	89	0.426881	4.22	5.20726	-11.7734	-10.0632
115	218	115	138	154	91	0.462408	3.83	2.30629	12.3956	-10.5332
116	218	116	157	193	131	0.393997	3.66	-20.0388	-40.7952	23.4236
117	218	117	76	154	68	0.511679	4.02	-4.00041	13.0091	-13.6929
118	218	118	0	168	107	0.433188	5.27	25.553	38.7855	-20.0136
119	218	119	157	193	131	0.437731	4.13	-5.49903	-3.96726	17.8914
0	219	0	3	121	112	0.471234	3.62	-3.83616	-28.6051	22.0369
1	219	1	3	121	112	0.494885	4.52	-15.503	-21.3629	1.25922
2	219	2	138	154	91	0.496477	4.47	-5.30218	-18.659	-4.97091
3	219	3	3	121	112	0.458027	4.74	13.6932	7.15564	-17.3983
4	219	4	157	193	131	0.574543	4.46	0.795332	-2.78914	-7.73787
5	219	5	157	193	131	0.452087	4.03	-2.76281	17.4141	-8.21081
6	219	6	75	124	89	0.481654	4.89	11.2564	9.07837	-4.60156
7	219	7	0	168	107	0.635143	5.03	0.653445	6.81546	-7.68847
8	219	8	3	121	112	0.424637	4.92	-0.792756	23.7853	1.11476
9	219	9	0	168	107	0.479183	3.57	4.59488	15.2095	7.14009
10	219	10	75	124	89	0.452793	5.48	15.4032	8.94601	0.925338
11	219	11	76	154	68	0.484293	5.38	-7.64647	-12.205	2.21348
12	219	12	0	168	107	0.483821	5.01	3.10179	3.78637	-15.9902
13	219	13	3	121	112	0.42332	4.81	2.18757	1.71475	-7.81311
14	219	14	75	124	89	0.471832	3.57	-16.6131	-17.5995	8.55514
15	219	15	138	154	91	0.491434	4.72	9.01266	10.5379	-4.34915
16	219	16	157	193	131	0.470897	4.47	1.20542	10.4604	-9.21807
17	219	17	75	124	89	0.552418	4.28	-0.234676	9.92358	0.859183
18	219	18	3	121	112	0.420019	4.63	-3.83626	-3.68543	19.8058
19	219	19	138	154	91	0.521509	4.53	-15.3421	-9.91039	9.7435
20	219	20	157	193	131	0.432077	4.94	-7.54309	12.2489	-5.85199
21	219	21	76	154	68	0.473617	5.38	-20.3783	-34.243	26.6061
22	219	22	76	154	68	0.491087	4.2	12.8558	2.83108	-10.7961
23	219	23	157	193	131	0.42263	3.79	-6.74795	-1.30576	-12.4729
24	219	24	138	154	91	0.518266	4.08	-2.81077	3.4811	-9.59789
25	219	25	157	193	131	0.42287	5.37	1.82689	22.2978	-0.602268
26	219	26	157	193	131	0.404383	3.96	-4.23532	-1.29462	1.40154
27	219	27	3	121	112	0.439963	4.14	-8.04677	12.2929	5.74439
28	219	28	75	124	89	0.411472	5.04	2.26631	-7.96161	0.501323
29	219	29	138	154	91	0.470895	5.19	-4.36625	-18.7757	6.07183
30	219	30	157	193	131	0.453422	5.13	-13.4505	-3.39199	1.42615
31	219	31	3	121	112	0.418909	3.96	-16.3595	-19.0208	17.5395
32	219	32	75	124	89	0.482511	4.45	2.49936	12.0738	-1.62804
33	219	33	0	168	107	0.476065	4.87	7.72893	23.2709	-11.2857
34	219	34	76	154	68	0.425531	4.72	-12.4321	-9.55062	5.50686
35	219	35	138	154	91	0.505119	4.57	8.73408	7.67538	-0.460746
36	219	36	138	154	91	0.515584	5.1	2.5651	4.35748	-12.232
37	219	37	76	154	68	0.51114	4.04	7.46079	0.598675	2.10636
38	219	38	76	154	68	0.528646	3.76	-2.74682	6.23514	-7.18205
39	219	39	76	154	68	0.454303	5	8.73384	18.0717	-10.1373
40	219	40	76	154	68	0.433912	3.97	2.4469	-3.99467	1.82848
41	219	41	75	124	89	0.456426	5.2	1.08998	-6.72194	4.29466
42	219	42	157	193	131	0.481941	4.34	-11.1919	-10.0336	12.2755
43	219	43	157	193	131	0.497516	4.56	2.61205	3.55273	6.79019
44	219	44	138	154	91	0.422975	5.31	-7.94744	-7.60811	0.917217
45	219	45	0	168	107	0.39841	4.72	-15.3506	-6.87873	-3.66359
46	219	46	75	124	89	0.461001	4.44	4.65418	-1.48646	-6.5594
47	219	47	75	124	89	0.544483	4.32	-4.32757	1.58318	-4.67742
48	219	48	157	193	131	0.428027	4.54	-5.72994	0.48753	2.83059
49	219	49	76	154	68	0.467549	4.71	-20.1531	-9.61872	4.52855
50	219	50	3	121	112	0.427109	3.97	-5.49548	10.1369	2.30028
51	219	51	157	193	131	0.444739	4.86	-25.7185	0.15986	13.256
52	219	52	3	121	112	0.459256	3.68	3.21452	12.1958	-4.1412
53	219	53	75	124	89	0.464838	3.81	5.59738	-0.936767	1.16984
54	219	54	76	154	68	0.45241	4.22	3.69344	15.3972	-3.88287
55	219	55	76	154	68	0.450036	3.75	-7.17601	3.74358	2.47471
56	219	56	157	193	131	0.415683	5.31	-13.0591	-14.99	11.0498
57	219	57	138	154	91	0.43819	4.94	-1.95522	1.08215	-4.13584
58	219	58	138	154	91	0.44567	4.11	4.72638	10.7189	-5.50222
59	219	59	75	124	89	0.4752	4.76	8.60874	0.921001	-4.82434
60	219	60	76	154	68	0.472641	5.5	-7.9937	-7.44867	-4.42845
61	219	61	0	168	107	0.452156	4.68	-3.66448	7.65241	-4.53844
62	219	62	75	124	89	0.459683	4.53	-0.260865	8.97794	3.37581
63	219	63	76	154	68	0.430196	3.54	-6.70334	-3.56604	6.58252
64	219	64	75	124	89	0.41987	5.4	-3.99907	6.49568	-7.38247
65	219	65	75	124	89	0.431306	4.26	-5.70834	-1.37362	-8.95365
66	219	66	157	193	131	0.494876	4.61	-10.0174	-6.83498	-8.84382
67	219	67	76	154	68	0.494365	4.62	-0.781132	1.29361	-0.108177
68	219	68	138	154	91	0.468934	5.43	-15.0186	0.530319	12.0216
69	219	69	157	193	131	0.53041	4.91	-8.76026	0.477534	17.7339
70	219	70	3	121	112	0.494014	4.07	-0.649866	-31.1936	21.9133
71	219	71	0	168	107	0.717553	5.43	-8.38334	3.73005	11.8232
72	219	72	157	193	131	0.379036	4	-23.8034	-26.7625	28.5981
73	219	73	138	154	91	0.415594	4.11	-18.1103	-19.0098	-4.17633
74	219	74	157	193	131	0.481136	3.66	-11.5872	-9.32423	-13.4128
75	219	75	138	154	91	0.466797	3.76	5.44661	17.3548	-17.8285
76	219	76	0	168	107	0.428328	3.91	-10.1592	-2.56762	0.219436
77	219	77	138	154	91	0.41988	4.55	4.60907	4.39988	-9.92376
78	219	78	0	168	107	0.415549	5.35	-0.537554	3.19876	-2.18898
79	219	79	0	168	107	0.519848	4.6	-17.3497	-0.660879	9.99965
80	219	80	138	154	91	0.549454	4.85	-0.419828	3.57839	11.9829
81	219	81	3	121	112	0.470968	4.83	1.53094	23.4234	-13.7436
82	219	82	3	121	112	0.456461	5.12	6.06425	-4.8408	2.62334
83	219	83	3	121	112	0.387828	4.23	-6.43413	-7.4487	4.57112
84	219	84	138	154	91	0.478533	4.02	5.99899	17.3979	-12.1869
85	219	85	75	124	89	0.386221	4.65	12.1835	1.58536	-5.5881
86	219	86	75	124	89	0.41372	4.75	-0.929251	-7.88572	3.03868
87	219	87	3	121	112	0.491228	4.83	-6.89697	1.91402	-1.59141
88	219	88	0	168	107	0.404772	3.55	-12.7368	-4.38493	-0.849084
89	219	89	3	121	112	0.452314	4.1	9.43775	26.5672	-9.06442
90	219	90	0	168	107	0.428882	5.33	-9.41178	3.54303	-2.32145
91	219	91	0	168	107	0.44842	5.26	-5.43734	-1.44782	-10.3346
92	219	92	76	154	68	0.433864	3.62	-2.95273	18.64	-4.54801
93	219	93	75	124	89	0.413423	4.78	-7.41716	-0.581324	24.3966
94	219	94	3	121	112	0.448966	4.93	0.0916488	-11.0232	21.9588
95	219	95	3	121	112	0.431528	3.99	2.34121	11.518	-18.0656
96	219	96	3	121	112	0.457101	3.57	0.73992	8.15241	-5.35741
97	219	97	0	168	107	0.470663	5	-4.85552	16.3287	-11.4596
98	219	98	138	154	91	0.42018	4.72	-6.80982	-12.3825	19.6865
99	219	99	76	154	68	0.437736	4.23	-1.44656	-11.6363	-4.0102
100	219	100	157	193	131	0.463218	4.46	1.68698	10.7393	-10.5502
101	219	101	138	154	91	0.465764	4.43	2.26275	8.16916	-6.93684
102	219	102	75	124	89	0.407443	3.82	12.4096	18.3896	-7.92016
103	219	103	138	154	91	0.365095	3.91	-8.31196	-12.1955	19.5803
104	219	104	157	193	131	0.416633	4.93	-4.34574	-0.672079	-2.40689
105	219	105	0	168	107	0.366086	3.87	-1.91934	3.25219	-6.827
106	219	106	0	168	107	0.397675	5.17	-1.85356	2.78592	3.06965
107	219	107	75	124	89	0.422076	5.28	2.2256	6.69399	-9.77486
108	219	108	138	154	91	0.397638	4.98	-4.50004	3.93677	2.046
109	219	109	76	154	68	0.40111	3.89	-4.16513	-26.2833	20.6805
110	219	110	0	168	107	0.446629	4.11	-9.40858	-6.20872	-1.42863
111	219	111	75	124	89	0.436251	3.63	-4.00429	-0.862654	-5.28053
112	219	112	76	154	68	0.450853	4.82	-3.02631	-5.35577	3.43432
113	219	113	76	154	68	0.414432	3.52	6.25952	-4.32437	-6.58137
114	219	114	0	168	107	0.506011	4.07	1.7709	17.3894	-9.04644
115	219	115	3	121	112	0.389619	3.69	-4.24641	-5.45053	7.93631
116	219	116	0	168	107	0.447193	4.63	-8.3844	-8.1121	-2.85198
117	219	117	76	154	68	0.496677	3.81	6.42491	30.5797	-20.7945
118	219	118	0	168	107	0.55137	4.03	-4.23222	-0.341801	11.9247
119	219	119	157	193	131	0.412937	3.53	-23.1335	-17.8259	12.5365
0	220	0	138	154	91		4.18	-9.80207	5.95641	6.11507
1	220	1	138	154	91	0.418338	4.88	24.2252	-6.52985	-2.2878
2	220	2	76	154	68	0.485887	4.72	-7.55031	5.04247	7.78734
3	220	3	3	121	112	0.415507	4	-17.1035	-64.375	24.1996
4	220	4	3	121	112	0.341993	3.91	22.7322	40.9965	-36.4874
5	220	5	0	168	107	0.519667	3.56	-23.475	-43.0061	31.9582
6	220	6	75	124	89	0.4393	3.62	6.47101	-2.55054	7.4754
7	220	7	3	121	112	0.394924	4.16	15.6899	2.79045	-11.1947
8	220	8	138	154	91	0.342526	5.04	23.4466	10.491	-22.9983
9	220	9	3	121	112	0.350109	4.16	6.24096	-25.4559	-11.509
10	220	10	157	193	131	0.336643	4.24	3.36253	-2.59879	-13.871
11	220	11	3	121	112	0.40629	4.35	7.1227	-6.14899	-3.12964
12	220	12	75	124	89	0.459844	5.14	6.63757	10.242	17.9298
13	220	13	138	154	91	0.363405	5.11	-21.3867	-19.1595	23.2677
14	220	14	3	121	112	0.412856	5.01	1.76297	11.0143	-3.44696
15	220	15	76	154	68	0.342415	4.58	1.99218	9.68872	0.622982
16	220	16	0	168	107	0.352886	4.48	-16.6371	4.9559	3.4151
17	220	17	76	154	68	0.36641	5.22	-1.53304	-7.83005	8.64735
18	220	18	157	193	131	0.423991	3.89	-8.68623	19.438	-17.5788
19	220	19	0	168	107	0.441579	3.6	14.914	34.6794	-13.3895
20	220	20	157	193	131	0.38116	4.95	-24.7406	-9.5471	19.709
21	220	21	157	193	131	0.325742	4.17	1.756	10.6048	-6.46945
22	220	22	75	124	89	0.391292	3.8	5.7249	14.7613	-29.0156
23	220	23	0	168	107	0.424889	4.77	-15.0318	26.5514	-7.3967
24	220	24	0	168	107	0.398459	4.99	-1.05771	-4.09751	4.05751
25	220	25	3	121	112	0.367985	5.38	-0.354509	10.7924	5.96037
26	220	26	0	168	107	0.363556	3.83	3.06269	-5.53412	11.133
27	220	27	3	121	112	0.420103	4.49	17.6225	-5.02891	5.29344
28	220	28	76	154	68	0.383697	4.69	-10.1633	-14.742	-5.71637
29	220	29	138	154	91	0.359273	4.55	4.57979	-1.51448	-11.3623
30	220	30	0	168	107	0.354812	4.41	-0.659539	6.86427	-9.12676
31	220	31	3	121	112	0.42036	3.5	25.8879	32.2025	-5.11863
32	220	32	138	154	91	0.400001	3.87	6.68207	23.4652	2.57417
33	220	33	76	154	68	0.372644	5.25	5.61799	-2.5083	8.76549
34	220	34	76	154	68	0.404079	4.18	0.910012	11.0909	-0.605111
35	220	35	157	193	131	0.365637	5.25	-2.72935	1.83165	-8.47884
36	220	36	3	121	112	0.365116	3.66	-5.65661	4.04217	-11.7917
37	220	37	157	193	131	0.500714	5.28	-5.03866	-4.79117	-13.1768
38	220	38	138	154	91	0.388297	4.84	8.13645	16.4917	-13.1126
39	220	39	76	154	68	0.418852	4.67	-3.31389	-4.11782	7.82129
40	220	40	76	154	68	0.354402	3.61	-11.1782	-5.78853	-6.73266
41	220	41	0	168	107	0.49599	4.93	7.94231	-2.94956	0.616611
42	220	42	0	168	107	0.349561	3.74	8.73536	16.4745	-2.08898
43	220	43	0	168	107	0.429181	3.95	5.34958	-9.71263	1.05961
44	220	44	3	121	112	0.432754	5.32	5.16451	2.70886	-7.91023
45	220	45	0	168	107	0.355297	5.49	0.127158	5.6883	4.83195
46	220	46	0	168	107	0.382817	4.5	-13.5847	-2.06812	7.54976
47	220	47	75	124	89	0.384363	4	5.03797	0.600158	-0.707917
48	220	48	75	124	89	0.485958	5.34	15.5296	1.61547	7.98775
49	220	49	76	154	68	0.403481	4.94	-5.31579	-30.0226	16.6032
50	220	50	76	154	68	0.36602	5.39	-2.78726	-7.49388	12.7274
51	220	51	138	154	91	0.425488	5.45	10.065	14.4011	1.95153
52	220	52	157	193	131	0.352928	4.98	-31.5448	-24.546	13.2058
53	220	53	157	193	131	0.372388	5.47	-3.07358	8.52041	-28.4721
54	220	54	0	168	107	0.448091	4.09	11.4402	37.129	-30.6503
55	220	55	75	124	89	0.456499	5.11	10.4381	6.8456	-1.95803
56	220	56	75	124	89	0.390017	3.64	-12.7452	-31.1803	-6.8834
57	220	57	0	168	107	0.371682	4.87	1.73818	22.4281	-14.2181
58	220	58	157	193	131	0.419187	4.98	-14.1254	-26.2926	18.5479
59	220	59	3	121	112	0.486841	5.27	0.51906	1.74153	30.3546
60	220	60	3	121	112	0.37221	5.49	-5.06499	-7.03615	8.53953
61	220	61	75	124	89	0.340708	5.11	-10.8814	-5.8084	-1.27273
62	220	62	75	124	89	0.456247	4.9	-9.35019	-15.45	13.6223
63	220	63	138	154	91	0.363822	4.66	0.191729	7.36476	-23.7681
64	220	64	75	124	89	0.45339	4.58	-4.06835	4.80747	-9.50254
65	220	65	76	154	68	0.536877	4.87	-0.410547	1.11303	25.8171
66	220	66	3	121	112	0.405438	5.23	14.1094	9.7417	-20.2045
67	220	67	157	193	131	0.418906	4.88	-8.92548	13.2754	-9.30231
68	220	68	138	154	91	0.480406	5	-0.867869	18.4081	0.722483
69	220	69	76	154	68	0.41992	4.73	-14.0581	-7.24187	21.7879
70	220	70	157	193	131	0.457538	3.52	-8.02079	-2.96054	15.0603
71	220	71	0	168	107	0.437119	4.8	-17.9332	-7.24208	1.71375
72	220	72	138	154	91	0.447695	4.78	-0.0393868	34.1831	-18.4264
73	220	73	157	193	131	0.389251	4.71	-18.9271	-22.39	-2.4549
74	220	74	138	154	91	0.456764	5.43	2.33364	19.1623	-11.6226
75	220	75	75	124	89	0.420266	3.77	-11.3815	-30.4242	13.9493
76	220	76	75	124	89	0.43993	5.23	-5.60736	-34.1013	-6.04517
77	220	77	75	124	89	0.426399	4.73	23.2969	30.1004	-22.7224
78	220	78	157	193	131	0.383944	5	-16.6901	-1.11955	29.9303
79	220	79	76	154	68	0.395498	5.31	-23.7277	-49.7039	34.8696
80	220	80	76	154	68	0.45907	4.99	0.673697	2.18158	16.8311
81	220	81	157	193	131	0.390598	4.38	5.891	8.58921	-1.46896
82	220	82	157	193	131	0.378113	5.39	-14.3032	-34.3418	-1.46114
83	220	83	138	154	91	0.484579	4.47	8.61825	30.1726	-23.7505
84	220	84	138	154	91	0.428108	4.51	-6.55517	4.22887	6.7746
85	220	85	3	121	112	0.419648	4.04	-0.279112	-7.77145	13.0648
86	220	86	0	168	107	0.357231	4.11	-4.69199	-4.91047	5.79679
87	220	87	75	124	89	0.366844	4.18	-15.219	-4.49871	-1.03641
88	220	88	3	121	112	0.371415	4.08	10.2873	17.9023	-34.0859
89	220	89	138	154	91	0.441053	5.26	8.46996	18.6281	-7.41029
90	220	90	75	124	89	0.436511	4.58	8.25969	24.3157	-1.28938
91	220	91	3	121	112	0.468096	5.2	3.09358	-9.77695	34.1701
92	220	92	138	154	91	0.599588	5.12	7.66091	-3.41471	-5.96946
93	220	93	75	124	89	0.415046	5.35	-25.0482	-23.1648	3.8401
94	220	94	157	193	131	0.531557	3.58	-8.53596	-0.246916	-10.7625
95	220	95	138	154	91	0.505263	3.57	13.3615	20.8342	-1.23608
96	220	96	0	168	107	0.438865	4.16	-5.71098	-12.5326	11.6503
97	220	97	138	154	91	0.454517	3.5	-7.17008	-16.5408	7.08471
98	220	98	76	154	68	0.376174	3.61	-14.399	20.1064	-27.0159
99	220	99	3	121	112	0.415749	4.22	-3.30915	-2.84542	8.82856
100	220	100	75	124	89	0.400341	4.35	15.1376	-9.30052	8.84269
101	220	101	157	193	131	0.359928	5.49	-12.5186	10.4606	-4.26406
102	220	102	0	168	107	0.587373	4.81	-9.65986	6.22451	2.8511
103	220	103	157	193	131	0.444828	3.72	12.081	33.9653	-22.6802
104	220	104	157	193	131	0.478539	4.5	-28.3392	-24.2382	24.8374
105	220	105	75	124	89	0.432047	3.83	-5.51784	-5.26087	19.1621
106	220	106	0	168	107	0.40869	5.3	-17.4369	-54.8155	7.97249
107	220	107	76	154	68	0.434158	4.15	-0.905226	6.27339	-14.7541
108	220	108	76	154	68	0.395805	5.38	5.22343	-8.27583	19.7287
109	220	109	76	154	68	0.379277	3.9	-24.6426	-12.7824	3.14223
110	220	110	76	154	68	0.414872	4.43	-7.68525	0.86549	7.88397
111	220	111	0	168	107	0.432391	4.65	7.84347	27.1326	-14.5089
112	220	112	3	121	112	0.470982	5.17	13.61	8.72783	-17.7052
113	220	113	3	121	112	0.434494	3.68	-3.28709	18.7729	-18.0661
114	220	114	76	154	68	0.434143	4.04	6.52658	16.8235	-7.64231
115	220	115	138	154	91		3.61	-4.33531	-3.62046	17.2409
116	220	116	75	124	89	0.481422	4.12	17.0478	-23.7237	-2.00297
117	220	117	157	193	131	0.417022	4.99	14.569	34.2076	-33.0256
118	220	118	138	154	91	0.413517	3.95	-6.0577	5.85902	19.6891
119	220	119	75	124	89	0.513148	4.8	-8.26751	-24.7601	5.43962

## Sheet: panel C
	subject	0	1	2	3	4	5	6	7	8	9	10	11	12	13	14	15	16	17	18	19	20	21	22	23	24	25	26	27	28	29	30	31	32	33	34	35	36	37	38	39	40	41	42	43	44	45	46	47
0	206	0.00539376	0.00484491	0.00429298	0.00373805	0.0031802	0.00261949	0.00205602	0.00148987	0.000921134	0.000349903	-0.000223721	-0.000799636	-0.00137774	-0.00195791	-0.00254004	-0.00312401	-0.00370971	-0.00429699	-0.00488574	-0.00547582	-0.0060671	-0.00665943	-0.00725269	-0.00784672	-0.00844139	-0.00903655	-0.00963205	-0.0102278	-0.0108235	-0.0114192	-0.0120146	-0.0126096	-0.0132042	-0.013798	-0.0143911	-0.0149832	-0.0155743	-0.0161641	-0.0167525	-0.0173396	-0.0179251	-0.0185089	-0.0190908	-0.0196709	-0.0202491	-0.0208251	-0.0213988	-0.0219703
0	207	0.330494	0.330327	0.330139	0.329931	0.329702	0.329452	0.329182	0.328892	0.32858	0.328248	0.327896	0.327523	0.327128	0.344498	0.344053	0.343587	0.343099	0.342591	0.342061	0.34151	0.340937	0.340343	0.339728	0.33909	0.338431	0.33775	0.337046	0.336321	0.335573	0.334802	0.334009	0.333193	0.332355	0.331493	0.330608	0.3297	0.328769	0.327814	0.326835	0.325833	0.324807	0.323758	0.322684	0.321586	0.320464	0.319318	0.318147	0.316952
0	208	0.294822	0.294164	0.296508	0.295856	0.295205	0.294557	0.296909	0.296263	0.295617	0.294973	0.294328	0.293684	0.293038	0.292392	0.291744	0.291094	0.290442	0.289787	0.289129	0.288466	0.2878	0.287128	0.286451	0.285769	0.285654	0.287956	0.28725	0.286537	0.285815	0.285085	0.284345	0.286595	0.286408	0.285635	0.284851	0.284056	0.283248	0.282428	0.281595	0.280749	0.279888	0.279014	0.278125	0.277221	0.276301	0.275366	0.274414	0.273446
0	209	-0.199592	-0.197747	-0.195868	-0.193955	-0.192008	-0.190701	-0.18936	-0.18731	-0.185227	-0.18311	-0.180961	-0.178778	-0.176564	-0.174318	-0.17204	-0.169731	-0.167392	-0.165023	-0.162626	-0.160199	-0.157745	-0.155264	-0.152757	-0.150898	-0.148341	-0.14576	-0.143156	-0.140531	-0.137886	-0.135221	-0.133213	-0.130512	-0.127797	-0.125066	-0.122323	-0.119568	-0.116803	-0.114028	-0.111247	-0.108459	-0.105666	-0.102871	-0.100074	-0.0979518	-0.0958306	-0.0930374	-0.090249	-0.087467
0	210	0.306158	0.305784	0.305388	0.304971	0.304533	0.304074	0.303595	0.303096	0.302578	0.302041	0.301485	0.30091	0.300318	0.299708	0.29908	0.298436	0.297775	0.297097	0.296403	0.295694	0.294969	0.294229	0.293475	0.292705	0.291921	0.291123	0.290311	0.289485	0.288646	0.287794	0.286928	0.28605	0.285159	0.284255	0.283339	0.28241	0.28147	0.280517	0.279553	0.278577	0.27759	0.276591	0.275581	0.27456	0.273528	0.272485	0.271431	0.270367
0	211	-0.132087	-0.129293	-0.126513	-0.123747	-0.120995	-0.118257	-0.115533	-0.112824	-0.11013	-0.10745	-0.104784	-0.102133	-0.0994962	-0.0968738	-0.0942657	-0.0916719	-0.0890921	-0.0865263	-0.0839743	-0.081436	-0.0789112	-0.0763997	-0.0739013	-0.0714158	-0.0689431	-0.0664829	-0.0640349	-0.061599	-0.059175	-0.0567625	-0.0543615	-0.0519717	-0.0495928	-0.0472248	-0.0448673	-0.0425203	-0.0401835	-0.0378568	-0.0355399	-0.0332329	-0.0309355	-0.0286477	-0.0263692	-0.0241001	-0.0218403	-0.0195896	-0.0173481	-0.0151156
0	212	0.311207	0.310668	0.310247	0.309715	0.309186	0.30866	0.308136	0.307614	0.307208	0.306689	0.306171	0.305653	0.305136	0.304618	0.304215	0.303696	0.303176	0.302768	0.302245	0.301719	0.301191	0.300661	0.300127	0.29959	0.29905	0.298506	0.297958	0.297405	0.296848	0.296285	0.305602	0.305018	0.304428	0.303832	0.30323	0.302622	0.302008	0.301387	0.300759	0.300125	0.299483	0.298835	0.298179	0.297515	0.296844	0.296166	0.29548	0.294785
0	213	0.71334	0.710655	0.707951	0.705227	0.702485	0.699724	0.696946	0.694151	0.691443	0.688615	0.685771	0.682912	0.680039	0.677151	0.67425	0.671335	0.668408	0.665468	0.662621	0.659657	0.656683	0.653698	0.650703	0.647698	0.644683	0.641659	0.638627	0.635585	0.632536	0.629478	0.626413	0.62334	0.620364	0.617277	0.614183	0.611082	0.607975	0.604965	0.601845	0.598719	0.595587	0.592449	0.589305	0.586156	0.583	0.579839	0.576673	0.5735
0	214	0.637616	0.636987	0.636346	0.635691	0.635021	0.634337	0.633661	0.632946	0.632215	0.631467	0.630702	0.629919	0.629117	0.628297	0.627457	0.626597	0.625717	0.624816	0.623893	0.622948	0.62198	0.62099	0.619976	0.618938	0.617875	0.616788	0.615675	0.614537	0.613373	0.612182	0.610964	0.609719	0.608447	0.607147	0.605841	0.604484	0.603099	0.601685	0.600241	0.598768	0.597266	0.595734	0.594172	0.592579	0.590957	0.589304	0.587621	0.585908
0	215	0.125241	0.122808	0.120376	0.117945	0.115516	0.113088	0.110662	0.108238	0.105818	0.1034	0.100986	0.0985767	0.0961712	0.0937706	0.091375	0.088985	0.0866009	0.0842232	0.0818522	0.0794881	0.0771315	0.0747831	0.0724431	0.0701118	0.0677897	0.0654772	0.0631747	0.0608828	0.0586017	0.056332	0.054074	0.0518282	0.049595	0.047375	0.0451686	0.0429761	0.0407982	0.0386351	0.0364874	0.0343556	0.0322401	0.0301411	0.0280595	0.0259957	0.0239501	0.0219232	0.0199154	0.0179273
0	216	0.228983	0.228315	0.227657	0.227007	0.226365	0.225732	0.225108	0.224492	0.223885	0.223286	0.222696	0.222114	0.22154	0.220974	0.220416	0.219866	0.219324	0.21879	0.218263	0.217743	0.217231	0.216725	0.216227	0.215735	0.21525	0.214772	0.214299	0.213833	0.213373	0.212918	0.212469	0.212025	0.211586	0.211153	0.210723	0.210299	0.209879	0.209462	0.20905	0.208641	0.208236	0.207833	0.207434	0.207037	0.206643	0.206251	0.20586	0.205471
0	217	-0.133136	-0.133343	-0.133547	-0.133748	-0.133946	-0.134142	-0.134335	-0.134525	-0.134711	-0.134895	-0.135076	-0.135254	-0.135428	-0.1356	-0.135768	-0.135933	-0.136095	-0.136254	-0.136409	-0.136562	-0.136712	-0.136858	-0.137002	-0.137143	-0.137281	-0.137416	-0.137548	-0.137677	-0.137804	-0.137928	-0.13805	-0.138169	-0.138286	-0.138401	-0.138513	-0.138623	-0.138731	-0.138836	-0.13894	-0.139041	-0.139141	-0.139238	-0.139334	-0.139428	-0.13952	-0.13961	-0.139698	-0.139784
0	218	0.412783	0.409628	0.406508	0.403422	0.400371	0.397354	0.394372	0.391425	0.388512	0.385633	0.382789	0.37998	0.377205	0.374465	0.371759	0.369087	0.36645	0.363847	0.361278	0.358743	0.356242	0.353775	0.351341	0.34894	0.346573	0.344239	0.341937	0.339668	0.337431	0.335226	0.333052	0.33091	0.328799	0.326718	0.324668	0.322647	0.320657	0.318695	0.316762	0.314857	0.31298	0.311131	0.309309	0.307513	0.305743	0.303998	0.302279	0.300584
0	219	-0.245946	-0.243738	-0.241533	-0.239332	-0.237134	-0.234939	-0.232748	-0.230561	-0.228378	-0.226198	-0.224023	-0.221852	-0.219685	-0.217523	-0.215365	-0.213212	-0.211064	-0.208921	-0.206784	-0.204652	-0.202525	-0.200404	-0.19829	-0.196181	-0.194079	-0.191983	-0.189893	-0.187811	-0.185736	-0.183668	-0.181607	-0.179554	-0.177509	-0.175472	-0.173443	-0.171422	-0.16941	-0.167406	-0.165412	-0.163426	-0.161449	-0.159482	-0.157524	-0.155575	-0.153637	-0.151708	-0.149789	-0.14788
0	220	0.0128628	0.0102803	0.00771211	0.00515869	0.00262048	9.79248e-05	-0.00240855	-0.00489851	-0.00737155	-0.00982726	-0.0122652	-0.0146851	-0.0170865	-0.019469	-0.0218324	-0.0241761	-0.0264994	-0.0288031	-0.0310862	-0.0333486	-0.0355898	-0.0378097	-0.0400078	-0.0421841	-0.0443382	-0.04647	-0.0485791	-0.0506653	-0.0527286	-0.0547686	-0.0567852	-0.0587782	-0.0607474	-0.0626927	-0.0646138	-0.0665108	-0.0683828	-0.0702308	-0.0720542	-0.0738529	-0.0756266	-0.0773754	-0.0790991	-0.0807976	-0.0824707	-0.0841185	-0.0857408	-0.0873375
[truncated: 3,452 more columns]

## Sheet: panel D
an	subject	tone	0	1	2	3	4	5	6	7	8	9	10	11	12	13	14	15	16	17	18	19	20	21	22	23	24	25	26	27	28	29	30	31	32	33	34	35	36	37	38	39	40	41	42	43	44	45	46
0	206	0	0.0466532	0.0449154	0.0431784	0.0414425	0.0397082	0.0379757	0.0362454	0.0345176	0.0327926	0.0310707	0.0293523	0.0276378	0.0259273	0.0242212	0.0225199	0.0208237	0.0191328	0.0174476	0.0157683	0.0140954	0.012429	0.0107695	0.0091172	0.00747233	0.0058352	0.00420607	0.00258522	0.000972902	-0.00063062	-0.0022251	-0.0038103	-0.00538598	-0.00695192	-0.0085079	-0.0100537	-0.0115892	-0.0131141	-0.0146282	-0.0161315	-0.0176236	-0.0191046	-0.0205742	-0.0220322	-0.0234787	-0.0249134	-0.0263363	-0.0277472
1	206	1	-0.0358657	-0.0352255	-0.0345924	-0.0339664	-0.0333478	-0.0327367	-0.0321334	-0.0315378	-0.0309503	-0.0303709	-0.0297998	-0.029237	-0.0286827	-0.028137	-0.0276	-0.0270717	-0.0265522	-0.0260415	-0.0255398	-0.025047	-0.0245632	-0.0240884	-0.0236226	-0.0231658	-0.022718	-0.0222792	-0.0218493	-0.0214284	-0.0210164	-0.0206132	-0.0202189	-0.0198333	-0.0194564	-0.0190882	-0.0187285	-0.0183773	-0.0180345	-0.0177001	-0.0173736	-0.0170555	-0.0167456	-0.0164437	-0.0161494	-0.0158632	-0.0155847	-0.0153139	-0.0150503
0	207	0	0.289042	0.287842	0.286618	0.28537	0.2841	0.282807	0.281492	0.280154	0.278794	0.277413	0.276009	0.274584	0.273138	0.307241	0.305733	0.304204	0.302655	0.301085	0.299494	0.297883	0.296251	0.294599	0.292927	0.291235	0.289523	0.287791	0.286038	0.284266	0.282474	0.280662	0.278831	0.27698	0.275109	0.273219	0.27131	0.269381	0.267432	0.265465	0.263478	0.261472	0.259448	0.257404	0.255342	0.253261	0.251161	0.249043	0.246907
1	207	1	0.371945	0.372812	0.373661	0.374491	0.375304	0.376098	0.376873	0.377629	0.378367	0.379084	0.379782	0.380461	0.381119	0.381756	0.382373	0.382969	0.383543	0.384096	0.384628	0.385137	0.385623	0.386087	0.386528	0.386945	0.387339	0.387709	0.388054	0.388375	0.388671	0.388942	0.389187	0.389407	0.3896	0.389767	0.389907	0.39002	0.390105	0.390163	0.390193	0.390194	0.390167	0.390111	0.390026	0.389911	0.389767	0.389592	0.389387
0	208	0	0.525053	0.522486	0.525937	0.52341	0.520904	0.518419	0.515955	0.513513	0.511091	0.50869	0.50631	0.503949	0.501609	0.499289	0.496988	0.494707	0.492444	0.4902	0.487974	0.485766	0.483575	0.481401	0.479243	0.477102	0.474976	0.478862	0.476762	0.474676	0.472604	0.470545	0.468498	0.466463	0.464439	0.462426	0.460423	0.45843	0.456445	0.454469	0.4525	0.450539	0.448584	0.446635	0.444691	0.442751	0.440816	0.438884	0.436955
1	208	1	0.0645905	0.0658426	0.0670798	0.0683014	0.0695068	0.0706954	0.0778635	0.0790131	0.080144	0.0812555	0.0823469	0.0834177	0.0844672	0.0854948	0.0864999	0.0874819	0.0884401	0.0893741	0.0902831	0.0911667	0.0920243	0.0928553	0.0936593	0.0944356	0.0963324	0.0970501	0.0977387	0.0983977	0.0990267	0.0996253	0.100193	0.106726	0.108376	0.108844	0.109279	0.109681	0.110051	0.110387	0.110689	0.110958	0.111193	0.111393	0.111559	0.11169	0.111786	0.111848	0.111874
0	209	0	-0.241602	-0.241641	-0.241614	-0.241521	-0.24136	-0.24248	-0.242183	-0.241818	-0.241385	-0.240883	-0.240314	-0.239676	-0.238971	-0.238197	-0.237356	-0.236448	-0.235474	-0.234433	-0.233327	-0.232156	-0.230921	-0.229622	-0.228261	-0.226838	-0.225355	-0.223813	-0.222212	-0.220554	-0.218841	-0.217073	-0.216602	-0.214729	-0.212807	-0.210836	-0.20882	-0.206758	-0.204654	-0.202509	-0.200325	-0.198105	-0.195849	-0.19356	-0.191241	-0.190242	-0.189216	-0.186815	-0.184393
1	209	1	-0.157582	-0.153853	-0.150122	-0.146389	-0.142656	-0.138922	-0.136537	-0.132802	-0.129069	-0.125337	-0.121608	-0.117881	-0.114157	-0.110438	-0.106724	-0.103014	-0.0993106	-0.0956137	-0.0919241	-0.0882424	-0.0845694	-0.0809057	-0.0772522	-0.0749587	-0.0713265	-0.0677067	-0.0641002	-0.0605078	-0.0569302	-0.0533684	-0.0498232	-0.0462955	-0.0427862	-0.0392962	-0.0358264	-0.0323777	-0.0289511	-0.0255474	-0.0221677	-0.0188129	-0.0154839	-0.0121817	-0.0089072	-0.00566138	-0.00244518	0.000740457	0.0038946
0	210	0	-0.000715139	-0.000584126	-0.000458058	-0.000335647	-0.000215447	-9.65168e-05	2.27351e-05	0.000143225	0.000266348	0.000393483	0.00052549	0.000663704	0.000809268	0.000963302	0.00112689	0.0013011	0.00148694	0.00168542	0.00189748	0.00212405	0.00236601	0.00262421	0.00289944	0.00319248	0.00350405	0.00383484	0.00418551	0.00455667	0.00494921	0.00536318	0.00579909	0.00625756	0.00673902	0.00724387	0.00777248	0.00832518	0.00890226	0.00950399	0.0101306	0.0107823	0.0114593	0.0121618	0.0128897	0.0136433	0.0144224	0.0152273	0.0160579
1	210	1	0.613032	0.612152	0.611234	0.610277	0.60928	0.608244	0.607167	0.606049	0.60489	0.603688	0.602444	0.601157	0.599826	0.598452	0.597033	0.59557	0.594062	0.592509	0.590909	0.589264	0.587573	0.585835	0.58405	0.582218	0.580338	0.578411	0.576437	0.574414	0.572344	0.570225	0.568058	0.565842	0.563578	0.561266	0.558905	0.556495	0.554037	0.55153	0.548975	0.546372	0.54372	0.54102	0.538272	0.535476	0.532633	0.529742	0.526805
0	211	0	-0.0150114	-0.012116	-0.00923101	-0.00635673	-0.00349337	-0.000641107	0.00219988	0.00502947	0.00784754	0.010654	0.0134488	0.0162319	0.0190033	0.021763	0.0245109	0.0272473	0.0299721	0.0326854	0.0353873	0.038078	0.0407575	0.043426	0.0460837	0.0487306	0.051367	0.053993	0.0566087	0.0592144	0.0618101	0.0643959	0.0669721	0.0695388	0.0720959	0.0746437	0.0771821	0.0797112	0.082231	0.0847416	0.0872429	0.0897348	0.0922174	0.0946904	0.0971538	0.0996073	0.102051	0.104484	0.106907
1	211	1	-0.249162	-0.24647	-0.243794	-0.241136	-0.238496	-0.235873	-0.233267	-0.230678	-0.228107	-0.225553	-0.223017	-0.220498	-0.217996	-0.215511	-0.213042	-0.210591	-0.208156	-0.205738	-0.203336	-0.20095	-0.19858	-0.196225	-0.193886	-0.191562	-0.189253	-0.186959	-0.184679	-0.182412	-0.18016	-0.177921	-0.175695	-0.173482	-0.171282	-0.169093	-0.166917	-0.164752	-0.162598	-0.160455	-0.158323	-0.156201	-0.154088	-0.151986	-0.149892	-0.147808	-0.145732	-0.143664	-0.141604
0	212	0	0.683085	0.681757	0.680658	0.679331	0.678005	0.676678	0.675351	0.674024	0.672695	0.671365	0.670033	0.668699	0.667363	0.666023	0.664681	0.663334	0.661984	0.660858	0.659498	0.658133	0.656762	0.655386	0.654004	0.652615	0.651219	0.649817	0.648407	0.646989	0.645564	0.64413	0.642688	0.641237	0.639776	0.638307	0.636828	0.635339	0.63384	0.632331	0.630812	0.629282	0.627741	0.626189	0.624627	0.623053	0.621467	0.619871	0.618262
1	212	1	-0.0606708	-0.0604204	-0.0601636	-0.0599007	-0.059632	-0.0593579	-0.0590788	-0.0587949	-0.0582785	-0.0579868	-0.0576915	-0.0573928	-0.057091	-0.0567866	-0.0562514	-0.055943	-0.0556327	-0.0553209	-0.0550079	-0.054694	-0.0543793	-0.0540643	-0.0537491	-0.053434	-0.0531193	-0.0528052	-0.0524919	-0.0521796	-0.0518687	-0.0515592	-0.0314829	-0.0312009	-0.0309209	-0.0306431	-0.0303677	-0.0300949	-0.0298248	-0.0295576	-0.0292934	-0.0290323	-0.0287745	-0.0285201	-0.0282693	-0.0280221	-0.0277786	-0.0275389	-0.0273033
0	213	0	0.791966	0.788823	0.785674	0.782516	0.779351	0.776179	0.772999	0.769812	0.766825	0.763622	0.760411	0.757193	0.753967	0.750733	0.747491	0.744242	0.740985	0.73772	0.734448	0.731167	0.727879	0.724583	0.721279	0.717967	0.714647	0.711319	0.707984	0.70464	0.701288	0.697928	0.69456	0.691183	0.688007	0.684614	0.681212	0.677801	0.674382	0.670953	0.667516	0.66407	0.660614	0.657149	0.653674	0.65019	0.646695	0.64319	0.639675
1	213	1	0.634714	0.632487	0.630228	0.627938	0.625618	0.62327	0.620893	0.61849	0.616061	0.613608	0.611131	0.608632	0.606111	0.603569	0.601008	0.598428	0.59583	0.593216	0.590793	0.588147	0.585487	0.582814	0.580127	0.577429	0.574719	0.572	0.56927	0.566531	0.563784	0.561029	0.558266	0.555497	0.552721	0.54994	0.547154	0.544363	0.541568	0.538977	0.536174	0.533368	0.530559	0.527749	0.524936	0.522121	0.519305	0.516488	0.513671
0	214	0	0.372002	0.374669	0.377343	0.380024	0.38271	0.3854	0.388138	0.390831	0.393523	0.396213	0.398899	0.401581	0.404255	0.406921	0.409577	0.412222	0.414854	0.417471	0.420072	0.422656	0.425221	0.427766	0.430288	0.432787	0.435261	0.437709	0.440128	0.442519	0.444879	0.447206	0.449501	0.45176	0.453984	0.45617	0.458363	0.46047	0.462537	0.464561	0.466542	0.468479	0.47037	0.472215	0.474012	0.47576	0.477459	0.479107	0.480705
1	214	1	0.903229	0.899306	0.895348	0.891357	0.887332	0.883274	0.879184	0.875061	0.870907	0.866721	0.862504	0.858257	0.85398	0.849673	0.845337	0.840973	0.83658	0.83216	0.827713	0.823239	0.818739	0.814213	0.809663	0.805088	0.800489	0.795867	0.791222	0.786555	0.781867	0.777157	0.772428	0.767678	0.76291	0.758124	0.753319	0.748498	0.743661	0.738808	0.73394	0.729057	0.724161	0.719252	0.714331	0.709399	0.704455	0.699501	0.694538
0	215	0	-0.0286334	-0.030201	-0.0317597	-0.0333092	-0.0348493	-0.03638	-0.0379012	-0.0394121	-0.0409128	-0.042403	-0.0438826	-0.0453513	-0.0468089	-0.048255	-0.0496896	-0.0511122	-0.0525226	-0.0539207	-0.0553061	-0.0566785	-0.0580377	-0.0593835	-0.0607155	-0.0620336	-0.0633373	-0.0646265	-0.0659009	-0.0671602	-0.0684042	-0.0696325	-0.0708449	-0.0720412	-0.0732215	-0.0743846	-0.0755309	-0.0766599	-0.0777715	-0.0788654	-0.0799413	-0.080999	-0.0820382	-0.0830591	-0.084061	-0.0850434	-0.0860063	-0.0869495	-0.0878728
1	215	1	0.279116	0.275818	0.272512	0.2692	0.265881	0.262555	0.259224	0.255888	0.252548	0.249203	0.245856	0.242505	0.239151	0.235796	0.23244	0.229082	0.225725	0.222367	0.21901	0.215655	0.212301	0.20895	0.205602	0.202257	0.198917	0.195581	0.19225	0.188926	0.185608	0.182296	0.178993	0.175698	0.172411	0.169135	0.165868	0.162612	0.159368	0.156136	0.152916	0.14971	0.146518	0.143341	0.14018	0.137035	0.133906	0.130796	0.127704
0	216	0	0.150386	0.151176	0.151977	0.15279	0.153614	0.154448	0.155292	0.156145	0.157007	0.157877	0.158754	0.159639	0.16053	0.161426	0.162328	0.163234	0.164143	0.165056	0.165971	0.166887	0.167804	0.168722	0.169638	0.170554	0.171467	0.172378	0.173285	0.174188	0.175086	0.175978	0.176863	0.177742	0.178612	0.179473	0.180325	0.181167	0.181998	0.182818	0.183625	0.184419	0.185199	0.185964	0.186715	0.187449	0.188167	0.188868	0.189551
1	216	1	0.30758	0.305455	0.303336	0.301223	0.299117	0.297017	0.294925	0.29284	0.290764	0.288696	0.286638	0.284589	0.28255	0.280522	0.278505	0.276499	0.274505	0.272524	0.270555	0.268599	0.266657	0.264729	0.262815	0.260917	0.259033	0.257165	0.255314	0.253478	0.25166	0.249858	0.248074	0.246309	0.244561	0.242832	0.241122	0.23943	0.237759	0.236107	0.234475	0.232864	0.231273	0.229703	0.228153	0.226625	0.225118	0.223633	0.222169
0	217	0	0.204702	0.203516	0.202323	0.201121	0.199913	0.198698	0.197476	0.196248	0.195015	0.193777	0.192534	0.191287	0.190037	0.188783	0.187526	0.186266	0.185005	0.183742	0.182477	0.181212	0.179946	0.178681	0.177416	0.176151	0.174888	0.173625	0.172365	0.171107	0.169851	0.168597	0.167346	0.166099	0.164855	0.163614	0.162377	0.161144	0.159915	0.158691	0.157471	0.156255	0.155045	0.153839	0.152638	0.151442	0.150251	0.149065	0.147884
1	217	1	-0.470974	-0.470202	-0.469416	-0.468617	-0.467806	-0.466982	-0.466146	-0.465298	-0.464438	-0.463568	-0.462686	-0.461795	-0.460893	-0.459982	-0.459061	-0.458132	-0.457194	-0.456249	-0.455296	-0.454336	-0.45337	-0.452398	-0.45142	-0.450437	-0.449449	-0.448457	-0.447461	-0.446461	-0.445459	-0.444454	-0.443447	-0.442438	-0.441427	-0.440415	-0.439403	-0.43839	-0.437377	-0.436364	-0.435351	-0.434338	-0.433326	-0.432316	-0.431306	-0.430297	-0.42929	-0.428284	-0.42728
0	218	0	-0.420239	-0.420935	-0.421585	-0.42219	-0.422748	-0.423261	-0.423727	-0.424146	-0.424518	-0.424843	-0.425121	-0.425352	-0.425536	-0.425672	-0.425761	-0.425802	-0.425796	-0.425742	-0.425641	-0.425493	-0.425298	-0.425055	-0.424766	-0.42443	-0.424048	-0.423619	-0.423144	-0.422624	-0.422058	-0.421447	-0.420791	-0.420091	-0.419347	-0.418559	-0.417727	-0.416853	-0.415937	-0.414978	-0.413978	-0.412937	-0.411855	-0.410733	-0.409571	-0.408371	-0.407132	-0.405854	-0.40454
1	218	1	1.2458	1.24019	1.2346	1.22903	1.22349	1.21797	1.21247	1.207	1.20154	1.19611	1.1907	1.18531	1.17995	1.1746	1.16928	1.16398	1.1587	1.15344	1.1482	1.14298	1.13778	1.1326	1.12745	1.12231	1.11719	1.1121	1.10702	1.10196	1.09692	1.0919	1.0869	1.08191	1.07694	1.072	1.06706	1.06215	1.05725	1.05237	1.0475	1.04265	1.03782	1.03299	1.02819	1.0234	1.01862	1.01385	1.0091
0	219	0	0.447415	0.446736	0.446039	0.445325	0.444593	0.443844	0.443078	0.442295	0.441496	0.44068	0.439849	0.439001	0.438138	0.437259	0.436365	0.435456	0.434532	0.433593	0.43264	0.431672	0.43069	0.429693	0.428683	0.427659	0.426621	0.42557	0.424505	0.423428	0.422336	0.421232	0.420115	0.418986	0.417843	0.416688	0.415521	0.414341	0.413148	0.411944	0.410728	0.409499	0.408258	0.407006	0.405742	0.404466	0.403178	0.401878	0.400567
1	219	1	-0.939307	-0.934212	-0.929105	-0.923988	-0.91886	-0.913722	-0.908574	-0.903417	-0.898251	-0.893077	-0.887894	-0.882705	-0.877508	-0.872305	-0.867095	-0.86188	-0.856661	-0.851436	-0.846207	-0.840975	-0.83574	-0.830502	-0.825262	-0.820021	-0.814778	-0.809535	-0.804292	-0.79905	-0.793808	-0.788568	-0.78333	-0.778094	-0.772861	-0.767632	-0.762406	-0.757185	-0.751968	-0.746757	-0.741551	-0.73635	-0.731157	-0.725969	-0.720789	-0.715616	-0.710451	-0.705294	-0.700145
0	220	0	0.861721	0.858998	0.856254	0.853491	0.850709	0.847907	0.845085	0.842244	0.839384	0.836505	0.833607	0.830691	0.827756	0.824802	0.82183	0.81884	0.815832	0.812806	0.809762	0.806701	0.803622	0.800526	0.797412	0.794281	0.791134	0.787969	0.784788	0.78159	0.778376	0.775145	0.771898	0.768636	0.765357	0.762063	0.758753	0.755428	0.752087	0.748732	0.745362	0.741977	0.738577	0.735164	0.731736	0.728295	0.72484	0.721372	0.71789
1	220	1	-0.835995	-0.838437	-0.84083	-0.843174	-0.845468	-0.847711	-0.849902	-0.852041	-0.854127	-0.85616	-0.858138	-0.860061	-0.861929	-0.86374	-0.865495	-0.867192	-0.868831	-0.870412	-0.871935	-0.873398	-0.874802	-0.876145	-0.877428	-0.87865	-0.87981	-0.880909	-0.881946	-0.882921	-0.883833	-0.884682	-0.885469	-0.886192	-0.886852	-0.887448	-0.887981	-0.888449	-0.888853	-0.889194	-0.88947	-0.889683	-0.889831	-0.889915	-0.889935	-0.88989	-0.889781	-0.889609	-0.889372
[truncated: 3,453 more columns]

## Sheet: panels C & D trials
	subject	trial_num	tone	ITI	pupil_stim_locked_t1	pupil_stim_locked_t2	pupil_baseline_stim_locked
0	206	0	1	4.15	-2.68819	-3.83963	1.34381
1	206	1	1	4.57	7.61612	-0.0844576	-1.17646
2	206	2	0	3.82	-5.74758	0.726749	0.863819
3	206	3	1	5.25	0.937564	-7.17654	-0.918363
4	206	4	1	5.05	7.7537	8.98066	-7.91376
5	206	5	0	3.88	-1.09	3.24333	0.342754
6	206	6	1	4.32	-1.20459	-2.05054	1.06143
7	206	7	0	4.03	1.61961	6.62866	2.1748
8	206	8	1	4.53	-1.12537	-12.0109	2.86575
9	206	9	0	4.52	1.19923	1.95508	-4.78479
10	206	10	1	4.04	2.46019	-3.36746	-2.04608
11	206	11	1	3.58	-6.51221	-2.2681	3.90009
12	206	12	1	4.24	5.60836	4.98115	-2.48348
13	206	13	0	3.99	5.56178	-6.17314	4.42716
14	206	14	0	4.95	1.50528	-2.95437	4.07204
15	206	15	1	3.8	-12.9767	-8.45634	6.0393
16	206	16	0	4.01	-15.8403	-5.38666	0.60524
17	206	17	1	4.91	3.17268	6.45342	-11.0505
18	206	18	0	3.88	-0.308153	3.08063	-2.44108
19	206	19	1	5.22	6.24643	6.61087	1.08239
20	206	20	1	3.88	2.00403	5.58962	-3.57753
21	206	21	1	4.89	4.1582	1.93461	-1.56108
22	206	22	0	5.16	-7.06345	-17.5504	12.7042
23	206	23	1	4.55	0.272352	1.19243	2.20406
24	206	24	0	5.02	-8.49677	1.57661	3.97718
25	206	25	1	3.97	2.12347	-2.58407	-1.64677
26	206	26	0	4.32	1.38163	-3.46462	-1.95507
27	206	27	0	3.92	3.7138	3.90164	-4.02826
28	206	28	0	4.57	4.43507	-1.47751	-1.46386
29	206	29	0	3.51	8.52597	1.1379	-7.49995
30	206	30	0	4.03	0.691036	6.27837	-1.02698
31	206	31	0	5.19	2.11051	4.0773	3.21361
32	206	32	0	4.86	4.67527	7.28523	-3.22433
33	206	33	0	3.64	0.857171	-6.03044	2.40064
34	206	34	0	5.16	-7.74538	-1.34985	1.57389
35	206	35	0	4.19	9.02392	4.0837	-11.9952
36	206	36	1	4.8	-0.265866	3.37074	-3.02645
37	206	37	0	4.81	2.73318	3.53657	-3.67898
38	206	38	0	4.94	-2.65259	1.02894	3.11501
39	206	39	0	5.03	3.19879	1.65357	1.2894
40	206	40	0	4.28	2.10163	7.24962	0.0932203
41	206	41	0	3.6	0.687315	0.502002	0.0315519
42	206	42	0	3.63	-4.6628	-4.20613	5.40708
43	206	43	1	5.09	0.267516	-2.46976	0.0980027
44	206	44	0	4.12	-11.7303	0.330001	1.26675
45	206	45	1	4.97	-1.57378	1.59393	-4.04847
46	206	46	0	4.81	-6.29171	-3.24445	4.45766
47	206	47	1	4.01	-2.96071	1.92215	2.81978
48	206	48	1	5.16	1.23889	-8.7047	3.12454
49	206	49	0	5.23	5.06214	14.2863	-9.02924
50	206	50	1	4.42	-0.659003	4.5968	7.782
51	206	51	1	3.8	1.64276	-6.04602	16.2898
52	206	52	1	5.13	-23.7129	-37.2201	16.6994
53	206	53	1	4.73	-9.4981	-6.57033	-4.1331
54	206	54	1	5.04	-4.42437	1.31815	-1.36822
55	206	55	1	3.72	-1.08842	-0.978085	-2.63556
56	206	56	0	3.92	10.0091	5.34567	-4.90924
57	206	57	1	4.92	-6.10125	-0.986676	-0.797066
58	206	58	1	3.53	3.60095	1.46001	-3.69939
59	206	59	0	4.24	-3.13053	2.99287	-1.36135
60	206	60	1	5.25	6.3454	2.28415	-2.66882
61	206	61	0	4.87	0.808542	6.91582	2.18808
62	206	62	1	4.43	-4.99827	-1.43887	6.6388
63	206	63	1	5.43	3.15891	1.90619	1.25932
64	206	64	0	4.9	-1.27639	2.46845	2.80938
65	206	65	0	4.36	-0.960324	0.00189735	3.67158
66	206	66	0	3.52	1.71943	-7.53106	-3.05069
67	206	67	1	4.69	-0.716951	5.28371	-0.56509
68	206	68	1	4.92	8.54187	6.05047	-5.7758
69	206	69	0	4.06	0.665428	-9.44968	-1.56226
70	206	70	0	4.47	12.1766	13.7326	-17.9595
71	206	71	1	4.44	-1.47774	0.640349	-1.34297
72	206	72	0	3.82	5.81155	10.2852	-10.4874
73	206	73	0	4.73	0.881009	-1.33161	3.10112
74	206	74	1	4.47	-3.94671	3.55377	2.00222
75	206	75	0	5.45	-1.15034	1.61421	4.86375
76	206	76	1	4.89	-3.80722	-0.776243	2.12735
77	206	77	1	4.46	6.34848	2.72965	-4.12985
78	206	78	0	4.81	9.00928	9.44026	-8.13568
79	206	79	1	4.91	1.60102	-0.229029	-1.16396
80	206	80	0	3.91	6.48979	2.04297	-3.95129
81	206	81	1	5.09	-8.24392	-2.14269	3.00958
82	206	82	1	4.43	-0.697086	-2.30851	2.92635
83	206	83	1	5.18	5.17882	3.96577	-0.46616
84	206	84	1	5	2.60702	-2.74286	5.44363
85	206	85	1	3.58	-0.201438	5.48952	2.34135
86	206	86	0	4.11	7.64897	10.3656	-2.68888
87	206	87	0	5.35	-5.90868	-5.63751	2.57957
88	206	88	1	3.94	0.805739	1.85571	-6.92697
89	206	89	0	5.29	0.43808	3.60163	-6.72092
90	206	90	0	4.82	-1.1763	6.34324	-7.03315
91	206	91	0	4.32	-2.03803	-2.65547	3.51781
92	206	92	1	4.36	7.88607	0.0226337	2.75089
93	206	93	1	4	-6.69298	1.96077	2.41186
94	206	94	0	5.24	5.93104	-2.30688	0.798661
95	206	95	0	5	0.206437	0.281317	2.33732
96	206	96	1	5.06	6.43228	11.0469	-1.43263
97	206	97	1	3.56	-2.29862	-0.196884	-0.875287
98	206	98	0	4.82	2.09336	4.61297	-3.92361
99	206	99	1	4.71	8.56657	7.52233	-9.81218
0	207	0	1	5.44	0.0189688	-10.2417	-6.89986
1	207	1	0	4.52	-1.0221	2.39308	6.36037
2	207	2	1	3.91	12.6743	-0.57129	-0.465214
3	207	3	1	4.39	12.995	33.8501	-16.431
4	207	4	0	5.28	-8.02989	-23.5818	0.563857
5	207	5	1	3.75	11.143	-0.748705	-24.8475
6	207	6	1	3.8	12.501	23.144	-16.3983
7	207	7	1	4.44	15.048	18.1691	-4.65323
8	207	8	1	4.94	-6.24796	-2.06948	5.23371
9	207	9	0	3.55	-3.65144	-10.6802	-4.58711
10	207	10	1	4.71	0.944286	3.90151	-2.74946
11	207	11	1	3.92	0.957221	1.27563	8.54043
12	207	12	1	4.61	11.1258	11.3471	4.82355
13	207	13	0	3.65	-2.49503	-12.7776	-1.89422
14	207	14	1	4.93	2.56433	-3.09199	-10.5964
15	207	15	1	4.08	9.01266	18.734	-4.77389
16	207	16	0	4.73	-17.0677	-22.3175	17.8552
17	207	17	0	4.4	-3.90697	-15.3738	1.83127
18	207	18	1	4.56	4.84194	-3.07677	-18.5255
19	207	19	0	5.07	10.2269	17.6467	-3.26118
20	207	20	1	3.78	1.53734	-2.73796	24.3213
21	207	21	0	4.16	-10.6946	0.612815	7.65707
22	207	22	0	4.7	5.69175	-11.9349	3.80767
23	207	23	0	4.73	-10.7395	-3.51848	3.49141
24	207	24	1	5.27	0.727384	-6.3776	-2.93315
25	207	25	1	5.01	-8.87899	-14.8985	1.30515
26	207	26	1	4.86	-0.13914	-4.70175	-0.362806
27	207	27	0	4.92	12.3039	17.2439	-12.0591
28	207	28	1	4.94	2.83387	9.83069	-11.5332
29	207	29	0	4.63	-10.3027	-10.2844	-6.39558
30	207	30	0	4.22	4.24427	3.13329	-13.0142
31	207	31	1	4.53	7.04038	15.044	-5.92449
32	207	32	0	3.94	1.56915	2.67357	12.8365
33	207	33	1	5.1	2.14001	12.1334	2.17013
34	207	34	0	5.19	-3.66913	-24.1196	15.4597
35	207	35	0	4.62	-19.0289	-28.3623	16.2395
36	207	36	0	5.43	7.71766	2.85369	-4.33405
37	207	37	1	4.94	-7.77511	-29.0445	-1.11352
38	207	38	0	4.66	12.5244	0.865306	-13.2314
39	207	39	0	3.66	-2.76482	-17.3755	-9.8526
40	207	40	0	4.7	6.87812	11.3909	-18.4003
41	207	41	1	4.34	3.79237	8.88428	5.14253
42	207	42	0	3.98	3.7302	0.765993	8.62703
43	207	43	0	5.12	-12.9135	-5.15387	17.109
44	207	44	1	4.15	6.05087	-3.47336	-6.46277
45	207	45	1	3.75	8.07745	3.43989	-1.65737
46	207	46	1	4.3	-2.81142	1.66009	-0.384705
47	207	47	1	3.94	-10.2469	-4.55852	9.27816
48	207	48	0	4.76	6.0037	8.2258	9.85873
49	207	49	1	5.09	4.84059	7.5332	7.88121
50	207	50	1	4.15	-1.13838	-1.19872	-10.4997
51	207	51	1	4.52	-3.83724	1.93581	-9.0187
52	207	52	1	4.28	3.12805	-0.898746	-12.9359
53	207	53	1	4.07	24.6028	30.5222	-18.9982
54	207	54	1	4.24	-8.65858	-20.3776	19.5351
55	207	55	0	4.85	20.8193	12.7809	-16.9214
56	207	56	0	5.29	9.49998	6.04104	-8.29774
57	207	57	1	4.19	3.22656	-6.82988	-6.54462
58	207	58	1	5.11	1.38468	-3.55782	8.3597
59	207	59	0	4.17	2.28067	16.9472	4.75937
60	207	60	0	4.96	-13.8026	-7.50749	24.9223
61	207	61	0	3.5	20.9377	8.15634	-0.486439
62	207	62	1	3.57	-2.64123	-18.1968	14.0527
63	207	63	0	3.64	3.9185	-0.848688	-4.52886
64	207	64	0	4.85	-2.98982	-15.0161	1.58578
65	207	65	1	5.27	7.11479	15.5424	-7.17326
66	207	66	1	4.9	8.4338	-0.788571	0.242879
67	207	67	0	3.96	-3.56982	-8.65528	-14.4431
68	207	68	1	3.53	8.06771	-4.76437	-29.635
69	207	69	0	3.86	15.9609	39.8259	-28.7554
70	207	70	0	3.79	1.40117	7.99136	-2.85846
71	207	71	0	3.97	-0.287975	10.2766	-12.6701
72	207	72	0	5.41	-1.42492	5.62017	6.34741
73	207	73	1	4.42	4.57897	-4.87612	12.7042
74	207	74	0	4.55	3.5543	21.4071	15.0732
75	207	75	1	4.61	-6.80498	-2.34699	21.6359
76	207	76	0	3.95	4.50063	6.04912	-7.44815
77	207	77	0	5.09	6.2434	10.5985	-6.51107
78	207	78	0	5.3	-13.8464	-21.3189	9.41653
79	207	79	0	4.86	2.96551	22.4814	-29.5687
80	207	80	0	4.27	-0.0803532	-5.14704	-9.0172
81	207	81	0	4.87	-4.92039	-9.53302	4.32346
82	207	82	1	4.8	8.63975	-2.02956	-12.272
83	207	83	0	4.82	2.89711	2.19629	6.19643
84	207	84	1	3.97	-1.51109	-18.164	19.8825
85	207	85	1	3.6	0.160207	12.4058	-3.28433
86	207	86	1	3.75	11.0539	1.58139	-19.1084
87	207	87	0	3.67	8.61038	10.6003	-13.0009
88	207	88	1	5.46	21.0383	44.4395	-5.49853
89	207	89	0	4.25	7.84767	4.55107	8.16921
90	207	90	1	5.03	6.8147	0.599521	-6.21845
91	207	91	0	3.79	28.0204	16.9967	-14.4721
92	207	92	1	3.82	-3.04166	-12.3175	-16.008
93	207	93	0	5.34	16.9176	19.5567	-29.3155
94	207	94	1	3.56	-2.85543	1.13336	-17.2072
95	207	95	0	4.87	10.22	14.323	-1.47784
96	207	96	0	3.99	1.84782	-5.57203	9.76999
97	207	97	1	4.05	-0.314904	6.91093	8.64493
98	207	98	1	4.58	9.82893	-12.4095	11.2336
99	207	99	0	3.68	-4.67627	-0.511565	-5.22116
0	208	0	1	4.02	-2.97305	-9.27204	13.768
1	208	1	1	3.74	9.95063	3.3281	0.809815
2	208	2	0	5.49	15.9638	8.47866	-2.56718
3	208	3	1	5.36	1.35903	-2.80269	-0.767146
4	208	4	1	3.97	8.16935	-4.06622	-5.71023
5	208	5	1	4.69	-4.28897	2.02478	-12.2365
6	208	6	0	5.31	6.40963	1.99281	-11.8406
7	208	7	0	3.83	18.9027	16.9869	-4.64689
8	208	8	1	4.93	0.835022	-2.02525	-9.06742
9	208	9	1	5.01	-12.9535	-5.76818	7.81926
10	208	10	1	5.45	5.77177	32.8819	-12.4339
11	208	11	1	5.5	-3.86794	-11.2369	5.90808
12	208	12	0	4.74	4.0004	15.6375	-1.23451
13	208	13	1	3.94	5.65066	-2.38111	16.7913
14	208	14	0	4.06	-7.15914	-9.76742	14.8828
15	208	15	1	4.4	4.68756	1.79403	-2.70792
16	208	16	0	3.68	5.86676	7.17124	-1.56804
17	208	17	0	3.65	-0.35632	-17.1173	0.732956
18	208	18	0	4.71	3.51766	-3.02153	-10.2519
19	208	19	1	5.22	3.31411	1.15461	-13.3707
20	208	20	1	3.99	-4.50139	4.73033	-12.5039
21	208	21	0	4.72	-6.21101	-10.0527	16.8611
22	208	22	0	4.72	1.855	6.65567	12.9942
23	208	23	0	4.23	-11.752	-7.38053	9.5035
24	208	24	0	3.92	-1.6416	6.92022	-4.55576
25	208	25	0	4.04	-7.40127	-0.66527	-4.42178
26	208	26	0	4.17	-4.90013	10.1996	2.00205
27	208	27	1	5.05	8.50033	-0.0797883	-2.77958
28	208	28	0	3.86	3.91193	-1.48882	-5.04562
29	208	29	0	3.59	5.34344	4.69337	-1.14958
30	208	30	0	4.87	-5.73699	-5.4058	8.72132
31	208	31	1	4.51	2.20496	0.239247	-5.26506
32	208	32	0	3.93	5.4536	1.96854	-2.45974
33	208	33	0	4.02	3.52591	-6.05925	-7.21106
34	208	34	0	3.87	8.12664	7.93264	4.32032
35	208	35	1	5.13	-0.201978	-7.32851	4.98533
36	208	36	1	4.73	-4.63135	5.00959	-7.29826
37	208	37	0	4.76	0.953212	6.40472	-9.21671
38	208	38	1	3.59	10.0806	-5.34161	20.0865
39	208	39	1	4.15	-9.93311	-14.8563	14.1545
40	208	40	0	5.29	5.11272	9.76419	-11.6307
41	208	41	0	4.95	0.0633594	-2.51093	8.69697
42	208	42	1	3.51	1.23542	-5.02128	-11.2695
43	208	43	1	4.97	-0.488382	7.30058	-13.9159
44	208	44	1	4.33	-0.391774	-3.75913	8.37207
45	208	45	1	5.25	7.25954	2.72347	3.58855
46	208	46	0	4.25	2.40286	0.205731	7.32623
47	208	47	0	4.4	2.06744	-2.16723	-3.39801
48	208	48	1	4.21	-8.01365	8.11626	-5.69981
49	208	49	1	4.7	5.05465	12.3799	-4.10571
50	208	50	0	4.24	-3.26559	-0.578612	8.3749
51	208	51	1	4.95	-5.29906	8.85357	-3.79593
52	208	52	0	3.91	-8.67879	-10.5856	-7.23928
53	208	53	1	4.89	5.75972	-8.54267	-11.9377
54	208	54	0	4.65	-2.42472	16.5465	-15.4839
55	208	55	1	3.6	-3.39823	9.00227	9.12272
56	208	56	1	4.58	-15.31	-22.0088	35.5154
57	208	57	0	4.58	-15.5727	-12.2625	20.2724
58	208	58	1	3.78	3.13789	4.41602	-7.33325
59	208	59	1	5.42	0.110728	9.18842	-3.93127
60	208	60	1	3.59	-0.77878	4.80885	4.13856
61	208	61	0	3.57	-9.90026	-14.5205	12.687
62	208	62	0	4.23	0.570986	-4.62271	-1.29051
63	208	63	0	4.91	-0.505821	13.8212	-9.37563
64	208	64	1	3.96	-7.82445	-11.8079	8.78697
65	208	65	1	3.68	-4.06167	-4.11644	-8.41027
66	208	66	0	5.15	6.30079	4.23296	-2.33891
67	208	67	1	3.63	-11.4791	-23.5178	7.65557
68	208	68	1	4.76	0.499014	2.52056	-11.8673
69	208	69	1	4.28	0.878071	-11.6702	-0.330323
70	208	70	0	5.22	5.58293	1.89186	-19.4802
71	208	71	0	4.92	13.6027	4.24972	-13.195
72	208	72	1	4.76	15.0506	17.2415	11.1653
73	208	73	1	5.06	17.388	36.1296	8.76425
74	208	74	1	4.74	-12.678	-38.9691	27.9542
75	208	75	0	4.05	-4.09508	-14.2951	-2.07999
76	208	76	1	4.03	-9.5775	-2.37439	-19.262
77	208	77	0	3.69	7.16464	15.0272	-1.00574
78	208	78	0	5.27	-0.870531	1.16632	10.1509
79	208	79	0	4.12	0.904915	-3.64997	-5.05015
80	208	80	0	4.89	4.6544	-3.44458	2.61871
81	208	81	1	3.89	15.1231	21.6266	-24.2098
82	208	82	0	4.6	35.0798	30.6263	-30.27
83	208	83	1	3.85	3.08814	-5.76124	-5.99076
84	208	84	1	4.37	15.3952	18.9753	-9.56721
85	208	85	0	5.46	-21.5356	-18.7829	29.2635
86	208	86	0	5.09	-2.54676	3.11432	2.60567
87	208	87	0	4.63	1.50399	-8.2023	8.78888
88	208	88	1	5.47	-10.9175	6.27372	-8.37782
89	208	89	0	4.32	2.7719	7.04277	-7.3327
90	208	90	1	4.82	-13.3864	12.0408	-8.87232
91	208	91	0	5.2	1.69624	33.7845	-0.326794
92	208	92	0	4.85	-3.96101	-5.26032	9.1252
93	208	93	1	4.56	-3.9879	-4.30834	-12.08
94	208	94	0	4.84	6.6307	1.0078	12.9799
95	208	95	0	5.16	-3.43229	7.53175	10.0852
96	208	96	0	3.71	3.0162	12.0195	-16.05
97	208	97	1	3.7	10.3969	3.69832	-5.11847
98	208	98	1	4.45	-10.8067	-30.599	-3.29542
99	208	99	1	5.07	34.0423	39.3298	-23.0146
0	209	0	1	5.04	13.7054	15.6789	9.0207
1	209	1	1	5.32	-4.7556	-15.9568	14.1641
2	209	2	1	3.89	-4.39013	-25.0112	34.6723
3	209	3	0	3.82	4.57847	0.930993	-21.7767
4	209	4	0	4.35	14.7714	1.60259	-32.7308
5	209	5	0	4.63	2.13522	-3.94314	-14.842
6	209	6	0	4.04	4.37772	7.362	-16.3054
7	209	7	1	4.6	5.25872	-11.9383	10.6879
8	209	8	1	5.12	4.96627	17.6332	-11.7176
9	209	9	0	3.82	-15.6378	-21.0509	1.9417
10	209	10	1	4.74	1.55013	7.42653	-9.71681
11	209	11	0	4.6	10.3103	24.4752	3.67357
12	209	12	0	5.04	11.0196	-6.85741	23.7366
13	209	13	1	3.57	-11.3638	-48.8768	37.6022
14	209	14	0	5.27	-10.4456	-8.88242	-17.5649
15	209	15	0	4.75	1.86926	-10.229	-10.8532
16	209	16	0	4.51	10.3704	8.98799	-20.7564
17	209	17	0	5.26	-12.0539	2.4131	-3.31528
18	209	18	0	3.55	1.01771	-4.1951	-0.673865
19	209	19	1	4.42	8.21819	7.68085	-0.970489
20	209	20	0	3.97	-1.69988	1.24956	3.56874
21	209	21	0	5.03	-8.35163	4.26802	13.1247
22	209	22	0	3.91	2.7131	3.35669	15.2879
23	209	23	0	4.62	-11.3992	-10.6252	9.28781
24	209	24	1	3.88	-1.23664	-11.449	-5.04108
25	209	25	0	4.82	12.0974	4.90332	-18.181
26	209	26	1	5.22	-1.16189	-3.82081	-7.87837
27	209	27	0	4.92	4.83697	20.1047	-11.7212
28	209	28	1	4.27	0.0781565	8.67062	8.66931
29	209	29	1	4.4	13.9131	21.4973	-1.92026
30	209	30	1	4.15	6.61589	8.84943	11.4777
31	209	31	0	4.85	0.98538	-10.3908	11.2666
32	209	32	0	4.8	-1.97926	-16.6274	4.55187
33	209	33	1	5.25	-7.94644	0.320631	-5.17779
34	209	34	1	4.95	3.47567	1.38386	-4.54037
35	209	35	0	3.52	-11.4066	-3.72379	5.39912
36	209	36	1	5.07	-16.076	-6.79511	8.52516
37	209	37	1	4.53	11.239	8.21424	-4.53339
38	209	38	1	4.53	-10.2534	-6.38395	3.22386
39	209	39	1	4.06	-0.413414	9.60195	-4.34719
40	209	40	1	4.42	-16.4762	0.296234	1.32093
41	209	41	1	4.15	1.45001	-4.8018	1.67214
42	209	42	0	5.17	-13.6803	-18.8836	15.4246
43	209	43	0	4.78	-3.63644	-0.357075	-2.46003
44	209	44	1	3.67	6.07866	11.2504	-4.2414
45	209	45	1	4.36	1.54666	2.35538	-1.13119
46	209	46	1	5.43	-2.0248	-2.48297	-6.32712
47	209	47	0	4.18	-3.80094	-5.26276	-2.07554
48	209	48	1	3.63	7.08031	5.53143	7.32148
49	209	49	0	4.14	-0.772788	-8.74478	11.7474
50	209	50	1	4.29	-8.93053	-20.6257	17.6525
51	209	51	0	4.23	5.25456	-6.96076	17.3687
52	209	52	1	5.13	10.2854	-13.635	-1.12966
53	209	53	0	4.71	1.72268	0.323483	-5.47833
54	209	54	0	3.96	3.1683	-5.70049	-0.106777
55	209	55	1	3.55	13.8565	3.05666	-21.6836
56	209	56	1	5.31	12.0362	32.1362	-27.0954
57	209	57	1	5.39	6.77262	-4.18418	-12.2059
58	209	58	1	3.75	-13.7895	-14.756	-1.08632
59	209	59	0	4.31	16.7803	17.3244	-17.1658
60	209	60	1	4.07	8.30988	4.90757	-1.49379
61	209	61	0	5	5.99188	8.60472	7.1711
62	209	62	1	5.06	-4.91336	-16.9079	16.0291
63	209	63	1	5.15	-0.431633	-0.414861	8.46244
64	209	64	0	3.87	2.79072	18.5051	4.02019
65	209	65	0	3.95	1.65388	-13.4177	12.9553
66	209	66	0	3.81	-6.91366	2.65059	8.81116
67	209	67	0	5.48	14.4394	18.4889	-6.27303
68	209	68	1	3.57	6.7844	3.26811	-12.2547
69	209	69	1	5	7.93307	8.42062	-6.68777
70	209	70	0	4.02	-26.6027	-29.8398	2.68051
71	209	71	1	5.48	4.52947	-6.23997	-8.13495
72	209	72	0	3.85	1.18981	-3.74132	-9.13589
73	209	73	0	5.42	4.55125	0.213764	-7.52423
74	209	74	1	3.56	4.83726	18.9469	-4.70811
75	209	75	1	4.39	-24.5458	-11.9249	18.663
76	209	76	1	3.97	-22.8656	-22.0086	5.53093
77	209	77	0	5.01	-5.85758	-4.16942	-15.1607
78	209	78	1	3.99	-9.95309	6.60147	-13.7573
79	209	79	1	4.93	-8.43826	-1.44741	-8.26675
80	209	80	0	4.95	-1.36415	8.65867	-8.72283
81	209	81	0	3.54	1.89184	5.76086	28.7259
82	209	82	0	3.63	5.33619	-11.4036	40.1422
83	209	83	0	4.95	3.29053	10.94	39.1149
84	209	84	0	5.24	-13.6558	-24.7174	34.2124
85	209	85	1	5.47	8.16815	-6.74702	-6.73692
86	209	86	1	4.74	-7.90187	6.56016	-19.1812
87	209	87	1	5.01	0.850416	19.256	-18.2757
88	209	88	0	4.24	11.3138	18.4913	-19.0549
89	209	89	0	4.76	-9.32727	5.56704	-0.928579
90	209	90	0	5.28	-21.3249	-18.4902	-5.84226
91	209	91	1	4.7	8.55795	8.87841	-12.1305
92	209	92	0	4.25	17.8037	23.0983	-11.1505
93	209	93	0	5.35	-0.0391553	12.0545	-18.9613
94	209	94	1	5.03	-1.52996	0.769692	-24.8092
95	209	95	0	4.31	13.7056	14.9335	-14.5712
96	209	96	1	5.43	3.73628	8.62495	11.5429
97	209	97	1	4.33	-1.40719	-8.42966	20.6767
98	209	98	1	5.13	2.41422	7.93207	3.2892
99	209	99	0	3.72	-12.7666	-20.9228	18.3736
0	210	0	0	5.01	12.4871	3.96441	1.11283
1	210	1	0	5.44	2.54107	-3.64916	-2.62156
2	210	2	0	4.11	-8.65335	-6.25411	-5.40543
3	210	3	0	3.53	17.0413	18.4098	-2.73968
4	210	4	1	4.15	-3.33264	-1.31139	-5.34641
5	210	5	1	5.41	-12.6972	9.06713	7.7383
6	210	6	1	4.2	13.0463	36.1435	-21.5619
7	210	7	1	4.2	11.6899	6.58587	1.84118
8	210	8	0	4.45	16.802	8.53628	-4.63261
9	210	9	0	4.95	2.14637	3.44572	-1.83284
10	210	10	0	5.08	-3.44079	-1.21159	6.40162
11	210	11	0	4.97	-7.36693	9.16632	-13.0373
12	210	12	1	4.29	-12.9516	-25.7077	9.37902
13	210	13	1	5.06	-7.7813	-21.3379	9.01893
14	210	14	1	4.02	-4.5134	5.96091	-13.1806
15	210	15	1	4.6	7.68572	19.6048	-15.9998
16	210	16	0	4.93	9.16427	26.1575	-4.99798
17	210	17	1	5.02	-34.1202	-28.558	30.8606
18	210	18	1	5.23	5.26645	9.06995	3.04201
19	210	19	1	5.24	-22.1681	-39.9713	14.0889
20	210	20	1	4.27	8.40022	-3.68895	-10.5942
21	210	21	1	3.68	5.31945	19.784	-7.88901
22	210	22	1	4.43	6.23153	21.945	-17.3007
23	210	23	0	3.74	-4.93866	-5.39558	9.1431
24	210	24	0	4.3	4.06287	-1.16929	3.56835
25	210	25	0	4.43	-0.674239	-8.25696	9.5262
26	210	26	1	4.23	0.648087	-16.8115	5.7124
27	210	27	1	4.17	-2.58429	-8.60062	2.71891
28	210	28	0	4.52	12.3344	4.68599	-1.59405
29	210	29	0	3.52	-7.76751	7.16227	-8.38268
30	210	30	0	4.73	4.99227	-4.09586	-1.98717
31	210	31	1	3.92	15.6568	-0.175906	-8.23111
32	210	32	1	5.22	5.58463	9.98527	-7.12524
33	210	33	0	5.44	-17.4075	-13.3364	14.154
34	210	34	0	4.81	0.522807	9.42559	3.84143
35	210	35	1	5.27	-8.90226	15.6504	-22.9954
36	210	36	0	4.33	-4.09886	-5.20022	2.49001
37	210	37	1	4.36	-20.2574	-23.7519	6.29073
38	210	38	0	3.54	23.2569	44.8781	-9.32439
39	210	39	0	4.35	14.9613	9.1395	17.4296
40	210	40	0	3.81	8.79192	7.80351	-1.20359
41	210	41	1	4.66	-8.21361	-4.74858	13.4681
42	210	42	1	5.37	1.19617	-6.08149	14.0006
43	210	43	1	4.81	-20.3735	-7.79196	-6.83921
44	210	44	0	5.18	-10.0467	-17.2165	-1.58584
45	210	45	1	4.01	-14.4101	10.5689	-4.7751
46	210	46	0	4.21	3.72487	3.13656	-12.1942
47	210	47	1	4.64	4.4106	7.91945	0.674924
48	210	48	0	3.8	4.33602	-3.52715	2.48685
49	210	49	0	5	-8.56291	-4.90633	11.2996
50	210	50	0	3.86	5.77979	1.15731	-13.255
51	210	51	0	4.12	-7.60299	-10.6426	-1.71531
52	210	52	1	4.49	14.3782	8.35837	-6.67472
53	210	53	1	5.29	-9.22996	-20.8036	12.2601
54	210	54	0	3.61	17.7655	7.60714	5.02157
55	210	55	1	4.01	13.9871	-10.5719	11.9421
56	210	56	0	4.88	2.18417	8.9672	-7.01731
57	210	57	0	4.09	-12.2867	1.1889	4.5728
58	210	58	1	5.07	4.86929	-20.2848	3.45791
59	210	59	0	4.09	14.8621	7.98087	-13.2351
60	210	60	0	3.6	6.32646	-14.8767	0.590489
61	210	61	1	3.51	8.13475	17.811	-11.0718
62	210	62	0	4.65	8.80043	19.843	-14.2459
63	210	63	0	5.06	-7.1651	-9.39385	12.9025
64	210	64	0	4.28	-13.7735	-1.81462	0.715896
65	210	65	1	5	-2.62186	-20.5519	0.429454
66	210	66	1	4.16	11.2939	30.542	-11.9954
67	210	67	0	5.18	-0.324952	10.3101	20.6113
68	210	68	1	3.56	-2.19146	-11.2919	-4.47622
69	210	69	0	4.75	6.35316	-17.3801	-10.8229
70	210	70	0	5.48	5.64929	13.934	-34.6963
71	210	71	1	4.21	18.4427	27.3641	-13.0809
72	210	72	0	3.76	2.88985	6.76319	15.3398
73	210	73	0	4.34	0.554942	-0.855084	7.29681
74	210	74	1	4.96	-5.6851	-1.1097	1.85262
75	210	75	1	3.96	-1.25234	9.65228	19.0201
76	210	76	1	4.34	-4.75945	-7.14225	21.0127
77	210	77	0	4.08	-2.73747	-6.27418	10.3458
78	210	78	1	4.83	-13.2393	-17.3542	0.871561
79	210	79	1	4.66	5.96375	-2.51156	-9.65795
80	210	80	1	4.01	10.6139	-13.6649	-6.24386
81	210	81	1	4.9	1.39205	6.59756	-8.78395
82	210	82	0	5.36	-0.494996	-1.87988	-2.00009
83	210	83	0	5.01	-3.07015	2.02749	-7.8948
84	210	84	1	4.78	7.80796	3.16814	-3.79307
85	210	85	0	4.56	5.5191	2.46308	-7.88274
86	210	86	1	5.01	-0.472525	-1.37993	1.78009
87	210	87	1	3.92	3.01584	-5.76647	16.2662
88	210	88	0	4.31	8.07697	-5.86347	6.43959
89	210	89	1	5.5	-4.34079	-20.3496	15.1747
90	210	90	1	4.05	-12.1269	-5.59093	8.08689
91	210	91	1	5.15	11.5645	5.1429	-9.98738
92	210	92	0	5.37	5.69569	-10.3169	-1.67751
93	210	93	1	4.35	20.0443	21.5808	-6.30665
94	210	94	1	5.03	-15.2081	-26.0379	30.3821
95	210	95	0	4.93	3.84209	3.60968	0.871871
96	210	96	0	3.8	-0.863512	-7.67778	5.81846
97	210	97	0	5.4	-4.26647	-2.63974	-1.79501
98	210	98	1	4.64	2.80742	0.488699	-3.1213
99	210	99	0	3.96	-8.44011	-1.53641	-4.66371
0	211	0	0	3.76	0.869149	-4.29169	3.3591
1	211	1	0	4.61	20.0445	23.8354	-24.1301
2	211	2	0	4.13	0.424418	-6.59491	-5.76614
3	211	3	0	5.4	4.99161	4.0664	3.30905
4	211	4	1	4.4	1.12757	-12.6767	13.0149
5	211	5	1	3.59	0.112927	2.57801	-5.41377
6	211	6	0	5.15	6.0297	-5.96775	-9.58244
7	211	7	0	4.86	-2.39052	8.40901	-18.7053
8	211	8	0	5.31	15.1917	7.97634	-3.53499
9	211	9	0	5.02	-6.58768	4.74486	7.35959
10	211	10	1	4.83	6.30311	31.5057	-16.2996
11	211	11	0	5.45	-6.86403	-9.39439	17.5575
12	211	12	1	3.73	-2.03311	-1.73255	20.9286
13	211	13	1	4.13	15.0515	8.36637	-2.5514
14	211	14	1	3.51	-3.53675	-1.9696	0.230192
15	211	15	1	4.37	2.67684	4.12959	-4.94704
16	211	16	1	3.82	0.876576	8.91002	-9.44289
17	211	17	0	4.57	5.20239	7.49164	-10.9228
18	211	18	1	4.39	2.55236	4.40648	-1.5512
19	211	19	1	5.38	0.0821701	-4.92757	-7.30268
20	211	20	1	4.19	6.3319	19.0224	-13.9194
21	211	21	0	4.34	4.89121	-1.87872	-0.493248
22	211	22	0	3.67	8.65782	7.3986	-6.55391
23	211	23	1	4.11	5.54906	5.2592	4.18333
24	211	24	1	4.55	-2.70997	10.1063	7.9301
25	211	25	1	3.75	-2.61849	8.19158	6.57624
26	211	26	1	4.58	-9.51439	5.58626	3.55979
27	211	27	0	4.45	2.04688	-12.8983	0.895746
28	211	28	1	5.32	-11.3363	-14.822	9.36472
29	211	29	0	3.54	-14.6694	-3.45373	-0.903117
30	211	30	1	4.41	-5.82792	5.00583	-1.58112
31	211	31	1	5.35	0.507386	6.79784	1.44981
32	211	32	1	5.48	-2.70063	5.31349	-0.810453
33	211	33	0	4.73	14.2481	6.81908	-3.21969
34	211	34	0	3.65	0.959274	-12.3437	-4.0368
35	211	35	0	4.44	15.1314	8.53266	-17.1664
36	211	36	1	4.03	-4.08919	-6.41727	6.63489
37	211	37	0	4.56	-11.5837	-2.54768	4.45914
38	211	38	0	4.83	-0.81472	10.7023	-4.66316
39	211	39	0	5.01	3.52114	-1.78893	4.79386
40	211	40	1	4.14	6.0017	7.49679	1.59329
41	211	41	1	4.76	4.14666	-11.119	7.74057
42	211	42	1	4.53	6.46383	6.2884	-6.04733
43	211	43	0	3.54	-6.59446	-7.66521	3.32881
44	211	44	1	3.67	0.201356	0.859857	3.22497
45	211	45	1	5.18	-4.36588	-4.08231	3.41503
46	211	46	0	3.72	-4.76426	6.93656	-1.64933
47	211	47	0	4.82	-12.5558	-8.64505	10.4929
48	211	48	1	4.31	-5.72305	0.515704	-1.97319
49	211	49	0	4.72	-1.68371	-9.01881	-3.92913
50	211	50	0	5.09	-10.7915	11.8714	-0.375035
51	211	51	0	3.89	-4.06303	5.64658	-10.8611
52	211	52	1	4.58	-13.7767	-4.18824	-5.59629
53	211	53	1	4.15	-8.23622	-1.43706	10.0944
54	211	54	0	4.08	-10.2068	-11.6646	5.35881
55	211	55	1	3.73	0.145751	11.4409	-5.73106
56	211	56	0	4.78	-4.71131	-3.93602	5.78417
57	211	57	0	4.37	4.15802	18.9288	-3.28775
58	211	58	1	3.75	6.35584	0.532921	9.8824
59	211	59	1	5	8.31557	-6.30288	7.76659
60	211	60	0	3.84	-0.390067	1.89444	-1.42132
61	211	61	1	4.03	-1.66997	-7.00962	6.4502
62	211	62	0	4.29	-0.31526	1.7525	0.444946
63	211	63	1	4.58	-2.57075	-10.0377	5.26114
64	211	64	0	4.17	-6.01199	-12.3769	-5.14122
65	211	65	1	4.24	7.05239	14.1841	-16.2938
66	211	66	0	5.33	-2.24618	-9.20696	7.81014
67	211	67	0	3.87	-2.91204	-0.0600673	-4.3413
68	211	68	0	3.59	0.557086	4.30965	-6.02419
69	211	69	1	5.02	13.4441	15.497	-6.08568
70	211	70	1	3.73	3.37403	-18.2058	14.3844
71	211	71	1	3.96	-5.49691	-3.31881	-12.2282
72	211	72	1	4.36	18.583	16.8204	-16.9726
73	211	73	0	4.14	26.2603	30.0183	-13.619
74	211	74	0	5.42	4.19975	-2.99789	3.26741
75	211	75	1	4.48	9.18371	10.6358	-6.05176
76	211	76	1	3.81	18.8352	2.12139	-6.40759
77	211	77	0	4.52	14.3085	7.91108	-8.31001
78	211	78	0	4.96	-15.0451	-11.0465	3.59143
79	211	79	1	5	-15.4105	-3.90154	3.67794
80	211	80	0	4.31	-4.24721	-29.3328	18.9049
81	211	81	0	3.99	-5.03842	8.16992	-2.12887
82	211	82	0	5.38	9.59517	1.15518	-2.8232
83	211	83	1	3.78	1.521	-7.277	-4.94911
84	211	84	1	4.86	2.80902	3.16016	-11.7419
85	211	85	0	5.02	-6.84333	4.94182	-12.5616
86	211	86	1	4.63	1.63564	6.09808	-0.545941
87	211	87	1	3.74	-0.841169	9.10571	11.624
88	211	88	0	3.69	6.63109	6.93524	15.9216
89	211	89	0	3.51	18.3553	4.37078	4.70975
90	211	90	1	3.88	-10.4362	-16.612	19.2313
91	211	91	0	4.42	4.41913	-14.9108	5.00162
92	211	92	0	4.65	-14.4141	-4.49344	-1.11237
93	211	93	1	4.97	27.4626	17.585	-23.7873
94	211	94	0	4.33	6.61901	6.53279	-11.7167
95	211	95	0	4.43	-10.541	10.1365	-1.63425
96	211	96	0	4.8	-7.55263	-3.77269	0.857295
97	211	97	1	5.16	-0.358798	-9.93484	-3.27043
98	211	98	1	4.03	1.52426	-5.5616	14.8388
99	211	99	1	4.9	0.181527	-9.42996	-0.30444
0	212	0	0	4.55	10.4911	-1.43851	17.6548
1	212	1	1	3.52	-0.154613	11.2008	11.8624
2	212	2	1	4.37	12.3193	-16.3443	13.2977
3	212	3	0	5.04	8.80815	-1.40986	12.3844
4	212	4	1	5.24	-1.1935	-6.00121	-19.4676
5	212	5	0	5.14	-0.543859	0.628139	-22.2365
6	212	6	1	3.72	8.69812	13.9031	-4.60698
7	212	7	1	3.74	-17.087	-6.59698	10.639
8	212	8	0	4.56	1.28665	15.0226	-12.9353
9	212	9	1	3.97	5.02295	-0.454813	-8.17075
10	212	10	0	4.77	2.2856	12.2915	4.07554
11	212	11	0	5.23	2.09759	-5.89204	0.832724
12	212	12	1	4.07	-4.54572	-13.9762	4.47362
13	212	13	1	3.84	2.42755	6.0808	-6.01491
14	212	14	0	4.71	1.59767	-4.03582	1.6382
15	212	15	1	3.82	7.53228	7.91435	-11.5972
16	212	16	0	4.95	-2.70432	-12.7706	9.4951
17	212	17	0	4.92	0.100791	-13.0691	28.144
18	212	18	0	4.43	2.77412	-14.0617	1.46575
19	212	19	1	4.57	0.550233	-8.14934	-0.802164
20	212	20	0	4.03	1.50359	5.87827	-17.7765
21	212	21	0	3.7	-8.67694	1.27715	-1.17331
22	212	22	1	4.52	6.06349	13.8284	0.158607
23	212	23	1	5.02	-2.93378	11.3297	10.7989
24	212	24	0	4.96	3.62778	22.0793	-26.245
25	212	25	1	4.18	15.4342	27.0875	-23.0722
26	212	26	0	4.56	-8.55278	-12.4618	-3.35011
27	212	27	1	4.03	3.61786	-11.006	3.45314
28	212	28	1	5.4	-3.99247	-3.20835	1.48072
29	212	29	0	3.69	6.16261	-3.88458	11.8931
30	212	30	1	4.16	3.71237	23.6481	16.853
31	212	31	1	3.76	11.1075	-3.27684	-2.77167
32	212	32	1	4.42	-1.53068	5.50431	-9.71346
33	212	33	1	4.77	-1.58522	-4.47841	1.92407
34	212	34	0	4.21	-9.02811	-12.081	-3.84316
35	212	35	0	4.05	-9.5194	2.22188	-9.05574
36	212	36	0	3.6	-4.40152	-3.60268	1.23744
37	212	37	1	4.43	-0.789358	1.0204	4.39934
38	212	38	1	4	-8.53325	-8.85008	6.46318
39	212	39	1	4.72	3.48053	3.70973	3.5187
40	212	40	0	4.15	7.17139	1.18299	-2.45283
41	212	41	0	4.13	-13.2191	4.44479	1.65824
42	212	42	0	4.61	-24.4847	-2.95184	12.3438
43	212	43	0	3.66	-21.1696	13.4939	-1.38715
44	212	44	0	4.63	-17.5846	-25.684	5.56472
45	212	45	1	3.62	0.0966164	5.5235	-3.58576
46	212	46	1	4.31	9.99045	25.1169	7.70123
47	212	47	0	5.32	-7.94779	-17.3987	3.45423
48	212	48	1	3.93	9.67734	25.8231	-24.4295
49	212	49	0	3.51	5.47525	2.39176	-13.0707
50	212	50	0	4.72	6.92932	4.90962	-4.25306
51	212	51	1	4.09	7.8063	-9.70065	13.8337
52	212	52	0	3.73	-13.6502	-29.1993	18.7741
53	212	53	0	5.18	6.00355	6.3803	-4.73105
54	212	54	1	4.45	7.26549	16.3553	5.39778
55	212	55	0	5.13	8.64385	3.91841	1.84961
56	212	56	0	4.41	3.74339	4.9855	-0.0458989
57	212	57	1	4.3	13.478	15.0849	-18.4908
58	212	58	0	5.06	-9.77326	13.0899	-8.17553
59	212	59	0	3.63	9.49631	14.8815	-21.6781
60	212	60	0	3.67	2.53008	-3.35428	-15.9066
61	212	61	1	5.16	7.69625	20.7483	-20.2158
62	212	62	1	4.59	5.87312	7.64803	6.79672
63	212	63	1	3.76	-5.1932	6.46237	7.29595
64	212	64	0	4.62	5.13258	-13.0206	-1.92438
65	212	65	1	3.73	0.466394	7.53174	-4.68687
66	212	66	0	5.43	-3.59701	-5.3658	12.7696
67	212	67	0	4.31	-6.95646	-2.93899	7.59206
68	212	68	0	3.99	-4.09156	-2.39478	9.02434
69	212	69	1	4.94	-4.43981	15.4754	-3.88134
70	212	70	0	4.28	6.28375	-14.2986	-2.99452
71	212	71	1	5.29	2.6242	-8.97405	-15.0196
72	212	72	0	5.1	-0.215297	-1.08537	-5.73842
73	212	73	0	4.94	7.63041	8.00446	5.14503
74	212	74	1	5.01	-2.84651	5.47724	3.21279
75	212	75	1	3.89	-20.7779	4.93499	9.54674
76	212	76	0	4.7	-10.1394	-6.42949	8.60547
77	212	77	1	4.37	9.55301	3.67384	4.75819
78	212	78	1	4.97	3.02531	-16.8511	5.94417
79	212	79	1	3.73	-2.64584	-9.77099	2.59117
80	212	80	0	4.26	-0.343607	-7.58114	-4.5328
81	212	81	1	3.83	-8.33273	-3.69721	-1.93604
82	212	82	0	4.72	-5.21538	3.43538	-9.99179
83	212	83	1	4.47	12.2142	-10.6104	-3.8855
84	212	84	1	4	-1.30509	-1.6868	0.64499
85	212	85	1	5.13	9.14397	15.7511	-20.3128
86	212	86	1	4.91	0.368932	6.15415	-3.94494
87	212	87	0	5.1	8.37841	-6.79859	5.05061
88	212	88	1	3.56	2.42369	3.61216	4.22731
89	212	89	0	4.85	8.03466	11.1225	0.195794
90	212	90	0	5.12	-14.488	0.525451	15.0256
91	212	91	1	4.19	6.04445	3.93843	7.39108
92	212	92	0	4.18	7.84204	2.92848	2.04669
93	212	93	1	4.37	-1.59261	1.32286	2.86779
94	212	94	0	4.19	5.25351	-16.1097	-4.58701
95	212	95	1	3.54	9.61764	4.50872	-16.5139
96	212	96	0	4.94	3.72048	-20.2728	-0.303458
97	212	97	0	4.79	3.04051	-37.5719	8.17222
98	212	98	1	4.52	3.78287	11.978	-2.7524
99	212	99	1	3.9	-10.3708	-11.5843	14.3284
0	213	0	0	4.76	14.9957	-23.6653	8.64597
1	213	1	1	4.54	7.71118	-25.7143	6.02554
2	213	2	1	4.14	-25.0223	-13.0461	17.3228
3	213	3	1	4.22	20.8067	-2.61406	2.8565
4	213	4	1	4.83	-2.68723	4.90697	1.85243
5	213	5	1	4.82	-18.2894	-25.2283	-6.76199
6	213	6	0	5.09	44.7459	21.5062	-11.0851
7	213	7	1	5.27	3.69319	-32.562	15.2464
8	213	8	0	4.68	-34.7677	-34.6463	11.92
9	213	9	0	4	-3.88548	-1.63645	-6.48822
10	213	10	1	4.28	0.86234	-18.5645	4.23605
11	213	11	1	5.28	0.834425	-42.8459	34.6483
12	213	12	1	4.33	6.56405	12.9224	-13.3903
13	213	13	0	4.5	-6.45627	-20.027	22.4477
14	213	14	1	5.34	18.8337	-25.8184	6.46235
15	213	15	1	4.09	-32.912	-34.2823	16.714
16	213	16	0	3.99	-13.7152	-34.8494	15.4458
17	213	17	1	4.32	-12.2248	-4.18767	-1.77987
18	213	18	1	4.85	-23.3553	-36.2109	25.9962
19	213	19	0	4.93	-4.09687	-8.20836	15.9341
20	213	20	1	4.79	-10.6113	-20.9065	8.29295
21	213	21	0	5.07	6.10231	4.40668	20.2252
22	213	22	0	4.75	6.32039	13.7345	-8.26668
23	213	23	0	5.47	-2.26967	11.9935	-17.1028
24	213	24	0	3.72	-13.6523	-8.51517	-2.02182
25	213	25	1	3.73	-25.1971	-7.69329	14.533
26	213	26	1	5.21	-12.3181	-41.7603	21.0195
27	213	27	1	4.51	-8.2376	-15.5842	8.13703
28	213	28	0	5.05	-10.5489	2.66116	7.71128
29	213	29	0	3.93	-25.0931	-8.86625	10.9995
30	213	30	0	4.36	-2.34137	-24.9624	7.40345
31	213	31	0	4.52	4.13681	-11.4653	3.81407
32	213	32	0	5.49	3.00454	15.4346	-2.88644
33	213	33	0	4.55	16.8962	39.5265	-6.31955
34	213	34	0	4.07	7.59211	-20.4184	8.83981
35	213	35	1	4.55	1.72578	-1.01423	-5.66164
36	213	36	0	3.59	2.82184	-17.6911	9.03385
37	213	37	1	5.04	3.48133	11.578	-18.2008
38	213	38	0	5.17	4.72218	14.7275	-20.7863
39	213	39	1	5.42	-3.65971	1.26582	3.22347
40	213	40	1	4.58	2.04407	7.58465	-11.584
41	213	41	0	4.98	-11.1159	-7.3197	9.79535
42	213	42	1	4.7	-6.96659	-2.91296	0.64173
43	213	43	1	4.07	-3.29719	-12.0023	18.5172
44	213	44	1	4.29	-21.5404	-8.13672	22.0156
45	213	45	0	4.67	3.02618	1.02537	15.2896
46	213	46	0	4.23	13.9586	-4.5486	-10.7772
47	213	47	1	5.18	-24.637	0.593714	11.9588
48	213	48	1	3.53	-10.0984	-36.5837	17.9595
49	213	49	0	4.48	17.1998	28.7975	-18.2952
50	213	50	0	4.68	-7.76659	7.03266	-7.83288
51	213	51	1	4.8	6.2834	27.7563	-24.4603
52	213	52	0	3.69	1.24733	0.0534799	5.07913
53	213	53	1	4.88	-9.28192	-1.83755	6.89478
54	213	54	0	4.19	-4.34162	10.9234	4.76764
55	213	55	1	3.84	9.20258	9.61976	-9.1647
56	213	56	1	4.3	-1.87355	8.7279	2.2042
57	213	57	1	4.95	-18.8704	-11.9994	27.3915
58	213	58	0	4.4	22.0638	-12.5539	-1.29766
59	213	59	0	4.13	-2.1765	-7.42143	-24.063
60	213	60	0	4.09	13.4255	10.4997	-23.5978
61	213	61	1	5.5	7.1439	2.75671	13.9152
62	213	62	1	5.3	5.23012	-14.9273	2.48108
63	213	63	0	5.05	11.6935	2.22851	-2.71241
64	213	64	0	3.53	3.35423	17.5113	-26.8096
65	213	65	0	3.63	7.93291	15.2779	-1.57843
66	213	66	1	4.44	-3.78583	2.29565	3.69269
67	213	67	0	5.04	-0.714063	-23.487	-11.6401
68	213	68	1	3.79	15.3455	53.5297	-23.3096
69	213	69	0	5.13	1.20463	-14.212	41.1731
70	213	70	1	4.96	9.6331	2.35095	1.17982
71	213	71	0	4.51	18.6124	9.66237	-6.33229
72	213	72	0	4.04	9.02333	16.8687	-27.3468
73	213	73	1	4.46	23.6566	27.2852	-19.3792
74	213	74	1	4.41	-1.3193	16.1588	-12.2053
75	213	75	1	5.01	-0.838602	-14.531	3.92807
76	213	76	1	4.75	-22.8584	3.48978	-7.7542
77	213	77	0	3.94	9.21094	53.0899	-22.7395
78	213	78	0	4.7	15.7327	-7.30314	29.1255
79	213	79	0	4.34	-15.8633	-3.05801	11.6019
80	213	80	1	3.55	-3.45416	-1.19591	-1.50229
81	213	81	1	4.1	-8.24262	1.72356	-9.53417
82	213	82	1	3.66	-8.68759	-8.41429	5.36253
83	213	83	0	4.53	2.26477	21.298	-8.83608
84	213	84	1	4.67	-22.6724	-0.235108	0.186873
85	213	85	0	4.83	10.2543	16.2296	-9.62902
86	213	86	1	4.47	30.1432	8.75747	-14.1595
87	213	87	0	3.71	39.2388	57.1554	-36.143
88	213	88	1	4.62	5.22332	-27.5385	14.5474
89	213	89	1	4.19	23.9071	28.1813	-27.8484
90	213	90	0	5.49	4.13922	29.4449	-13.7375
91	213	91	1	4.96	0.660699	10.4384	13.4282
92	213	92	0	4.88	4.76419	9.83821	0.700611
93	213	93	1	3.77	-21.747	-10.2166	14.21
94	213	94	0	5.29	-0.712263	-12.9374	-14.3062
95	213	95	0	4.11	1.63981	6.32813	-12.1827
96	213	96	0	5.29	-14.3693	-7.97289	15.1125
97	213	97	0	4.44	-5.01917	16.7518	-43.6778
98	213	98	0	3.71	2.22627	21.6874	-10.9
99	213	99	1	4.54	0.537683	13.0143	25.5726
0	214	0	0	4.47	-5.45043	-13.052	-0.726848
1	214	1	1	4.11	10.9345	19.9722	-14.7685
2	214	2	1	3.7	-7.24565	-13.1077	5.34881
3	214	3	0	4.42	3.12123	4.12142	-16.4918
4	214	4	1	4.68	11.2009	-0.169006	-14.1215
5	214	5	0	3.71	3.49567	2.8452	8.9596
6	214	6	1	4.28	5.71513	2.58086	5.5401
7	214	7	1	4.41	-19.1106	-15.7335	12.5027
8	214	8	1	4.59	14.2335	17.8016	-14.0093
9	214	9	0	4.57	5.74843	17.5514	-4.8725
10	214	10	0	4.64	2.48063	4.28371	-12.6982
11	214	11	1	5.03	-3.22103	2.83903	1.75675
12	214	12	0	4.21	-3.07878	-10.4267	-0.642714
13	214	13	1	3.8	-0.237142	7.84458	2.15003
14	214	14	1	5.05	-3.28538	-18.5395	4.92463
15	214	15	1	4.44	2.67124	-9.51763	3.79618
16	214	16	0	3.88	6.43089	12.4788	-3.1365
17	214	17	1	4.36	-6.23613	6.11438	-7.81618
18	214	18	1	3.64	-0.761369	-17.0058	0.596133
19	214	19	0	3.94	6.66779	19.8401	-13.3382
20	214	20	0	4.33	10.9563	16.2647	-4.0358
21	214	21	1	5.47	5.62195	0.581599	8.4053
22	214	22	0	4.28	9.9858	8.50768	6.88825
23	214	23	0	4.47	7.14362	-1.83566	8.47628
24	214	24	1	4.72	6.28455	4.18282	-3.87263
25	214	25	1	4.22	-7.17601	-9.00669	-1.84445
26	214	26	1	4.6	3.71265	14.6013	-16.0321
27	214	27	0	3.62	-10.5443	9.3229	-6.95055
28	214	28	1	4.57	-4.17506	-4.46047	-0.835485
29	214	29	0	3.64	10.3115	7.91332	-4.24727
30	214	30	1	4.15	11.0535	8.35942	-13.2194
31	214	31	0	3.81	7.76551	13.2761	-9.40756
32	214	32	1	4.66	-5.39021	5.43872	1.24612
33	214	33	0	5.09	-0.286004	6.53452	-7.84974
34	214	34	0	4.97	5.55049	12.192	-7.82206
35	214	35	0	3.92	1.24754	10.6416	-7.74952
36	214	36	1	3.7	10.4249	17.2663	-10.6035
37	214	37	0	4.44	7.15005	19.6789	-6.30162
38	214	38	0	4.95	-0.747454	0.628312	4.5591
39	214	39	1	5.26	4.1255	0.969275	-0.212421
40	214	40	0	4.32	-2.64844	7.36048	-6.39036
41	214	41	1	4.6	-1.89635	4.02398	-1.20291
42	214	42	0	3.72	-8.56509	0.161427	2.5877
43	214	43	1	4.22	-13.123	3.91634	9.78216
44	214	44	0	4.98	-7.2829	4.80533	-7.45827
45	214	45	1	5.11	-11.7309	-9.55654	1.08591
46	214	46	0	4.48	4.52192	19.8204	-17.1457
47	214	47	1	5.42	20.2845	23.6272	3.10552
48	214	48	0	5.49	-12.1188	-4.80819	14.1506
49	214	49	0	3.55	3.77012	-10.8625	-2.16618
50	214	50	0	5.34	-2.94184	-3.04929	-7.54164
51	214	51	1	5.32	9.48226	13.2937	-19.9849
52	214	52	0	3.9	5.02665	26.9822	-13.6123
53	214	53	0	4.01	-14.3448	4.36423	4.75584
54	214	54	1	4.14	-12.2213	-13.926	12.6315
55	214	55	1	4.95	-1.17636	-10.3766	10.5073
56	214	56	1	4.97	-1.57222	7.27061	-6.11649
57	214	57	0	4.37	5.73464	20.0679	-10.5084
58	214	58	1	3.91	-13.1999	-10.5228	8.58313
59	214	59	1	4.19	-15.9206	-13.7612	7.10453
60	214	60	1	4.66	1.96197	-8.41558	0.592723
61	214	61	0	3.75	-6.78583	0.454658	-3.77502
62	214	62	0	5.03	6.23176	8.04417	-2.84164
63	214	63	0	4.55	-3.43965	-15.4276	4.81659
64	214	64	1	5.44	-8.84056	-10.7859	3.29957
65	214	65	0	3.53	3.5875	-0.10447	4.41647
66	214	66	0	4.09	-5.60654	12.4956	-3.29552
67	214	67	1	5.26	-5.42372	-7.55836	13.7705
68	214	68	1	4.45	16.8045	12.6342	-9.41779
69	214	69	1	5.49	-7.10114	5.72274	2.45097
70	214	70	0	4.21	-2.37139	-22.5204	4.21282
71	214	71	0	4.73	8.4113	9.80852	-21.0308
72	214	72	1	4.32	9.40578	12.5765	-6.98967
73	214	73	0	4.28	6.0496	-4.15365	4.94627
74	214	74	1	4.12	0.269559	7.18002	1.56776
75	214	75	1	5.4	5.74019	12.7468	-5.94542
76	214	76	0	3.67	-7.30085	13.2656	-0.290324
77	214	77	0	4.06	-3.86493	1.23609	-1.70302
78	214	78	0	5.17	-1.26141	-4.33908	0.670331
79	214	79	0	3.61	-2.98818	8.69429	-5.26064
80	214	80	1	4.71	-11.5081	7.25715	-1.59037
81	214	81	1	3.58	2.14996	18.3153	-2.18486
82	214	82	1	3.58	3.36395	9.64191	-3.68658
83	214	83	0	3.76	-1.79241	-2.08423	1.62259
84	214	84	1	3.93	7.62087	14.7196	-2.71146
85	214	85	0	5.28	-0.676841	0.753064	5.72919
86	214	86	1	5.15	-8.90835	-9.4011	-1.09768
87	214	87	1	3.68	-10.626	-4.08292	-3.72046
88	214	88	1	4.84	1.69955	-1.36096	-11.5985
89	214	89	0	4.43	3.40681	20.9383	-19.118
90	214	90	1	3.62	-7.27162	8.51437	-5.83717
91	214	91	1	4.38	-15.9996	-10.1784	12.5903
92	214	92	0	4.45	3.72719	-8.21932	4.45651
93	214	93	0	4.27	-14.0691	-3.07515	11.5571
94	214	94	1	4.71	7.09342	10.9036	4.07087
95	214	95	0	4.48	-6.01867	6.64384	6.93876
96	214	96	1	4.13	-2.33037	1.37055	4.57396
97	214	97	0	4.46	2.05706	-5.14782	-8.79708
98	214	98	0	4.6	2.27471	4.97371	-10.9061
99	214	99	0	3.88	2.91924	11.3481	-13.0838
0	215	0	0	4.71	6.23543	13.9299	-4.76212
1	215	1	1	4.21	-15.1435	-24.0305	28.3534
2	215	2	0	5.24	2.59936	13.4879	2.34655
3	215	3	1	5.19	9.69331	-0.358961	-16.995
4	215	4	0	5.43	0.260961	-0.251654	-6.9349
5	215	5	1	5.29	-2.19619	10.6823	-14.6597
6	215	6	1	4.01	13.2277	5.16043	0.768441
7	215	7	1	3.69	2.38869	10.5599	-4.64528
8	215	8	1	4.26	3.42613	3.84451	1.51321
9	215	9	0	3.55	-1.18229	13.1064	-10.4587
10	215	10	0	5.18	13.9599	-3.61115	-6.61487
11	215	11	1	5.44	11.5563	-8.62081	-3.52607
12	215	12	1	4.96	0.634	-3.31234	-2.99884
13	215	13	0	5.08	-5.19648	-7.54751	7.54407
14	215	14	1	3.84	-2.64319	2.34765	-1.04732
15	215	15	1	4.54	-4.06135	6.5993	0.235301
16	215	16	0	5.08	6.76369	8.03052	0.105433
17	215	17	0	5.21	12.8876	4.64007	-1.08552
18	215	18	0	4.31	5.19644	16.569	-7.76365
19	215	19	0	3.53	-0.409475	8.97775	2.50836
20	215	20	0	4.08	-24.2829	-15.7446	13.2388
21	215	21	1	4.13	-8.97198	-18.6852	10.8347
22	215	22	1	4.24	0.914919	-1.04647	2.99557
23	215	23	1	5.28	1.26144	-13.6345	4.94062
24	215	24	0	4.83	0.224232	-6.36901	6.03607
25	215	25	1	4.86	0.222916	11.6542	-4.95554
26	215	26	1	4.24	0.076304	11.4708	-5.90367
27	215	27	1	4.3	-3.8037	0.229715	-2.01523
28	215	28	0	4.47	5.82993	9.85626	-13.2624
29	215	29	1	4.36	-4.87758	-14.8767	-8.1366
30	215	30	1	3.63	3.30347	1.4018	-13.2794
31	215	31	1	5.11	-6.2574	-0.927616	-16.7657
32	215	32	1	4.01	5.65879	48.2699	-26.0272
33	215	33	1	4.87	13.3476	-17.4699	39.6333
34	215	34	1	3.8	2.06826	-13.4964	40.1125
35	215	35	0	4.88	1.46199	0.625746	-2.8987
36	215	36	0	3.56	13.1466	21.0681	-4.63796
37	215	37	1	4.79	4.50525	-9.23666	1.17008
38	215	38	0	4.54	-7.62847	-9.06327	-6.08537
39	215	39	0	4.56	-6.18579	6.43642	-8.17924
40	215	40	1	4.82	12.6995	4.63044	-14.5892
41	215	41	0	4.09	-4.73515	-13.4897	-0.0530557
42	215	42	0	4.98	-3.11974	-0.813484	9.35249
43	215	43	1	5.17	-2.0308	8.63557	-2.73731
44	215	44	0	5.34	18.3041	17.1098	-15.9081
45	215	45	0	4.46	-7.18568	-8.73564	7.29011
46	215	46	1	3.75	-2.47154	9.29284	-1.84834
47	215	47	1	4.85	-1.51247	-7.509	0.173996
48	215	48	1	4.93	-0.0199215	-10.9141	1.76965
49	215	49	0	4.54	8.65909	7.6092	-8.18982
50	215	50	1	4.66	11.3292	8.73674	-8.33796
51	215	51	1	3.8	3.39306	15.6979	-4.09473
52	215	52	0	4.01	-4.30535	-2.84052	0.907967
53	215	53	1	5.2	9.99918	16.5851	-8.74477
54	215	54	1	4.93	-0.189285	-1.07486	7.00999
55	215	55	0	3.95	-1.43248	11.9065	-5.56811
56	215	56	1	4.56	10.3066	13.8831	-13.8356
57	215	57	0	5.36	10.7169	3.7079	-11.1703
58	215	58	0	4.26	10.8901	20.3386	4.95063
59	215	59	0	5.33	-5.82313	-7.97717	-4.5028
60	215	60	1	5.01	8.95469	21.5506	-10.2756
61	215	61	1	3.98	12.7428	2.01576	-2.4724
62	215	62	0	3.97	16.2641	19.1067	-13.5219
63	215	63	0	4.86	11.8552	8.19327	-12.3091
64	215	64	0	4.55	-6.31893	-6.24192	1.82916
65	215	65	0	5.26	6.96149	-7.09694	8.5433
66	215	66	1	4.62	5.53001	12.5743	-2.00577
67	215	67	0	3.89	4.24261	-2.62189	-1.28211
68	215	68	1	3.94	10.1328	16.5215	-18.7986
69	215	69	1	5.5	2.93781	-5.81373	-6.99064
70	215	70	0	3.5	-8.57957	3.63905	-1.93018
71	215	71	1	3.71	-11.2243	-5.04433	3.02786
72	215	72	1	3.75	-4.88997	5.72133	1.58473
73	215	73	1	4.67	-4.80998	2.05474	1.65449
74	215	74	1	3.66	2.12374	17.0811	3.01426
75	215	75	0	4.29	-0.769043	-9.1318	10.2839
76	215	76	0	5.11	-7.09362	-4.00163	4.14429
77	215	77	1	4.43	-17.9359	-3.37279	2.98973
78	215	78	0	5.02	-12.2356	9.15657	-8.72566
79	215	79	1	4.5	14.0633	16.7983	-3.13938
80	215	80	1	4.64	15.7529	12.6133	-10.5232
81	215	81	0	4.69	14.165	12.1655	-8.25193
82	215	82	0	4.84	1.69342	4.06623	3.27501
83	215	83	1	4.46	5.63912	-13.1403	4.15853
84	215	84	0	3.74	-3.62107	-19.1191	3.92708
85	215	85	0	5.44	16.2064	3.62347	-1.9306
86	215	86	0	3.82	-3.55682	-3.97475	4.38573
87	215	87	0	4.22	-7.82186	-13.3414	7.73048
88	215	88	0	4.06	6.82928	-6.35727	-3.79531
89	215	89	0	4.08	3.52459	-11.7713	5.53441
90	215	90	0	4.7	6.73792	0.322021	3.47867
91	215	91	0	3.77	4.38798	7.51784	-12.0665
92	215	92	0	5.32	4.57503	11.1924	-13.0953
93	215	93	1	5.41	14.0203	2.45602	-14.0925
94	215	94	1	3.79	-5.31814	5.56646	12.99
95	215	95	1	4.43	2.24513	1.11522	2.95988
96	215	96	0	4.65	-6.76903	-14.6093	21.8479
97	215	97	0	4.24	-7.72399	-16.2583	8.25869
98	215	98	0	4.34	-15.5462	-6.73467	1.79342
99	215	99	1	3.89	5.09442	5.61697	-9.63161
0	216	0	0	4.1	-4.50583	-15.5964	25.205
1	216	1	1	4.64	11.0486	9.6825	19.9356
2	216	2	0	4.96	9.3369	-18.0644	21.9767
3	216	3	0	5.23	-13.2882	-24.2635	26.5601
4	216	4	0	5.25	1.55503	-21.0328	31.8743
5	216	5	0	4.17	6.33837	0.617537	-33.8372
6	216	6	1	4.12	0.920906	4.23688	-20.2863
7	216	7	0	5.43	7.94337	-1.39901	-9.60203
8	216	8	0	4.98	0.692485	-13.1784	-18.4695
9	216	9	0	4.57	-15.5019	3.38118	-24.4875
10	216	10	0	4.32	9.81948	13.6165	-6.04984
11	216	11	0	4.42	-0.719	14.3948	10.4365
12	216	12	0	4.11	22.5899	14.3866	11.9939
13	216	13	0	4.7	5.88518	-27.3406	39.32
14	216	14	0	4.39	-0.299902	2.81764	-5.52474
15	216	15	1	4.05	23.9099	20.6777	-20.042
16	216	16	1	3.76	2.65735	8.62423	-4.98519
17	216	17	1	5.41	-1.67977	6.21926	-4.47966
18	216	18	1	4.01	-0.0728247	15.8182	-4.44998
19	216	19	0	4.87	4.64882	-5.36144	4.17096
20	216	20	1	5.45	6.55316	2.91518	-7.19349
21	216	21	0	4.18	-1.36174	-4.01454	-1.79097
22	216	22	0	3.77	1.50183	12.1331	-8.41319
23	216	23	0	3.84	-7.76898	-4.00023	0.535165
24	216	24	1	4.02	-6.10117	1.97971	-3.92563
25	216	25	0	3.53	10.4192	29.1163	-6.07917
26	216	26	1	4.7	-11.5136	-4.51787	4.0653
27	216	27	0	4.52	8.09767	4.63798	-8.45981
28	216	28	1	4.83	-6.45016	-7.73983	-2.9527
29	216	29	1	3.98	-4.52643	0.859712	7.19453
30	216	30	1	5.49	0.178647	4.42938	-0.283261
31	216	31	1	4.75	-12.3297	-3.75589	5.82686
32	216	32	0	5.14	17.1941	10.1938	-5.02254
33	216	33	1	4.27	-13.8444	4.15931	5.41058
34	216	34	0	5.14	7.33061	-3.41956	-3.20783
35	216	35	1	5.37	-3.10599	-0.276553	-4.11798
36	216	36	1	3.92	5.24525	2.35383	-3.34794
37	216	37	1	4.7	-5.00574	-6.80296	6.23617
38	216	38	0	5.23	2.97146	-6.35007	-2.89103
39	216	39	1	4.53	-5.43519	-6.62779	0.603744
40	216	40	0	4.52	22.5951	29.2313	-15.8693
41	216	41	0	5.36	-0.426153	6.31011	-5.37875
42	216	42	1	4.21	-14.0902	-21.1189	18.4144
43	216	43	1	4.35	-7.22254	6.96315	-6.03993
44	216	44	1	3.53	16.7759	14.3039	-8.38928
45	216	45	0	3.72	-5.06616	-9.10884	8.45499
46	216	46	0	5.43	-5.0414	-4.34512	0.737858
47	216	47	1	3.81	0.542423	-3.88532	4.95278
48	216	48	0	4.26	-1.31688	5.06447	-7.41015
49	216	49	1	5.12	4.01163	-7.98105	4.31629
50	216	50	0	4.54	-4.73456	7.35934	1.47602
51	216	51	1	4.81	7.34523	4.38632	-6.30142
52	216	52	0	4.43	-0.411842	-5.99512	2.69033
53	216	53	1	5.05	1.51133	6.98914	-5.7078
54	216	54	0	3.88	0.133276	8.63115	-0.121144
55	216	55	1	3.85	3.69747	-3.28348	0.754624
56	216	56	1	4.6	17.1809	19.1285	-4.86182
57	216	57	1	4.11	9.43311	7.8139	-10.5557
58	216	58	0	3.68	16.4237	10.6371	-15.8234
59	216	59	1	4.22	9.27805	-2.36583	-5.17441
60	216	60	1	5.04	4.14927	-7.35951	-1.51768
61	216	61	0	4.45	-9.20128	-5.59245	-0.684436
62	216	62	0	4.3	-8.65119	11.4046	-3.35258
63	216	63	1	4.57	9.69714	14.0542	-3.76058
64	216	64	1	5.09	16.207	-1.86156	15.4038
65	216	65	0	3.71	9.38883	8.42529	-9.31777
66	216	66	1	4.38	-2.3159	14.8649	-2.3017
67	216	67	1	4.15	-26.9504	-7.59768	12.0122
68	216	68	0	5.24	-13.4113	0.56742	2.15309
69	216	69	1	4.95	11.7496	6.62368	-5.01013
70	216	70	0	4.03	6.29666	0.903867	-17.8571
71	216	71	0	3.52	-4.22822	0.886464	-7.51394
72	216	72	1	5.12	-0.392217	-8.15378	0.119997
73	216	73	1	4.33	-3.41836	21.0915	-8.29288
74	216	74	0	4.68	12.4753	13.8413	-10.9132
75	216	75	0	3.86	0.0981073	-6.79167	0.137932
76	216	76	0	4	2.66171	-6.97319	12.5481
77	216	77	1	4.36	0.76515	-7.16836	1.93274
78	216	78	1	5.25	0.800494	-0.778586	11.0405
79	216	79	0	3.72	5.57095	-13.2456	0.610934
80	216	80	0	3.74	1.80346	-11.7052	0.708046
81	216	81	1	5.5	3.11914	-7.18433	-2.82665
82	216	82	0	4.11	-0.821731	4.37594	-2.48587
83	216	83	0	4.12	-9.37577	-22.7073	14.1077
84	216	84	1	4.74	-11.4441	-12.024	13.5654
85	216	85	1	3.6	-13.6628	-4.31497	2.08184
86	216	86	0	4.72	-9.92234	-0.902277	4.31247
87	216	87	1	4.97	-2.85944	-2.29065	-4.31522
88	216	88	1	4.62	-1.83435	3.54637	-5.14033
89	216	89	0	5.12	8.33385	10.4863	-9.97576
90	216	90	0	4.86	18.3196	11.6391	-12.1642
91	216	91	1	4.52	3.91748	-9.38278	2.21984
92	216	92	1	5.15	8.49373	13.1464	-5.50672
93	216	93	1	5.12	7.09539	-12.9144	8.79999
94	216	94	0	4.01	-16.5774	-10.7277	16.2642
95	216	95	1	3.79	-16.1961	-21.2269	11.8394
96	216	96	0	4.2	-2.30703	-6.28975	-2.61204
97	216	97	1	4.72	-1.02771	-3.54687	-0.978344
98	216	98	0	3.94	-6.26998	-6.1712	3.90763
99	216	99	1	5.45	1.63553	-8.59094	1.71995
0	217	0	0	5.44	1.58348	4.77039	-1.53752
1	217	1	0	3.55	9.41124	11.5513	-14.1415
2	217	2	1	4.48	5.36733	4.95683	-5.98929
3	217	3	1	5	10.6949	4.60573	-1.89294
4	217	4	1	4.96	10.4423	16.7438	-5.62381
5	217	5	0	3.91	5.23731	-5.55533	1.71948
6	217	6	0	4.54	-8.61046	-7.65307	-7.48681
7	217	7	1	4.46	9.46759	9.78044	-16.1483
8	217	8	1	5.26	6.12983	6.84956	-0.831748
9	217	9	0	4.1	2.89973	1.59387	1.98739
10	217	10	0	3.93	4.64797	-12.6269	1.60982
11	217	11	0	3.92	6.03246	-0.345159	-6.84198
12	217	12	0	5.44	2.62743	10.8597	-6.11054
13	217	13	0	3.6	8.98731	3.1677	3.06025
14	217	14	0	5.16	0.910245	-6.92894	0.932756
15	217	15	1	4.84	-9.37975	-5.96072	5.08785
16	217	16	1	4.75	-14.9348	-6.72422	8.39802
17	217	17	1	3.9	-0.575059	0.536179	-2.84006
18	217	18	1	3.86	19.4307	24.2476	-9.59531
19	217	19	1	5.21	-3.18138	-15.2105	30.5105
20	217	20	1	4.17	3.42419	1.39142	-3.21812
21	217	21	0	4.01	-1.43632	2.65657	-3.24927
22	217	22	0	5.02	-0.0998544	-11.4382	-3.72241
23	217	23	0	5.07	7.12053	9.08531	-16.037
24	217	24	0	4.72	13.6017	10.6252	-12.583
25	217	25	1	4.84	-0.349058	-5.64848	7.46054
26	217	26	0	3.73	2.43448	-0.787577	-10.5944
27	217	27	0	4.12	-4.44178	5.25118	-10.9802
28	217	28	0	3.74	12.2199	22.0007	-12.2489
29	217	29	1	4.35	24.3955	29.8276	30.7333
30	217	30	1	4.37	-6.59041	-12.1755	12.2833
31	217	31	0	3.59	-1.71594	-14.9337	-0.1017
32	217	32	1	4.77	5.71729	9.75184	-12.4568
33	217	33	0	5.3	-7.95496	-6.64322	2.84512
34	217	34	1	4.73	0.728944	6.18106	-13.9145
35	217	35	0	4.79	6.39783	2.95818	-5.52951
36	217	36	1	4.14	1.53047	3.9838	-6.22141
37	217	37	0	4.51	-11.6064	-2.8899	11.3156
38	217	38	1	4.71	1.62496	-13.9659	3.64921
39	217	39	1	5.46	22.3417	25.926	-8.99628
40	217	40	0	4.05	5.53571	20.2331	11.9615
41	217	41	1	5.45	7.6235	17.1864	-1.21578
42	217	42	1	4.77	-7.91401	-19.6595	4.63118
43	217	43	1	3.99	14.0335	30.5618	-9.25675
44	217	44	1	3.91	4.65954	-10.5658	18.2754
45	217	45	0	4.17	-3.5053	-19.12	13.8641
46	217	46	1	5.1	10.8384	4.2163	-11.1569
47	217	47	0	4.96	-4.9225	-7.64999	-11.4852
48	217	48	1	3.94	7.23986	3.80685	-9.57979
49	217	49	0	4.57	10.4693	5.07143	-5.43173
50	217	50	1	4.62	-10.945	-10.755	14.7032
51	217	51	1	4.9	-4.33626	-1.26018	-2.70877
52	217	52	1	4.28	-2.63928	11.1134	2.09709
53	217	53	0	4.41	6.75909	-9.17267	4.7939
54	217	54	0	4.8	9.87538	11.6131	9.57968
55	217	55	1	4.46	1.48722	-2.22806	8.66362
56	217	56	0	4.79	0.983947	-7.85365	-7.04506
57	217	57	1	4.97	8.66676	15.1457	-20.6593
58	217	58	0	4.25	3.40918	0.379451	4.8665
59	217	59	1	4.55	14.1228	16.2925	-10.4084
60	217	60	0	4.06	1.89751	-12.2592	6.63026
61	217	61	1	4.8	-4.08658	-11.4919	9.70409
62	217	62	0	4.97	5.81082	9.28321	-7.61816
63	217	63	1	4.17	-9.93947	-2.18214	0.766762
64	217	64	0	5.14	7.85441	4.47402	-5.61083
65	217	65	1	4.62	-1.27243	11.7092	-11.4561
66	217	66	1	4.38	-8.27717	-2.67215	4.278
67	217	67	0	5.19	5.39738	10.955	2.14589
68	217	68	1	3.89	2.29962	-7.166	5.56762
69	217	69	0	5.26	-0.34283	-7.02722	6.90223
70	217	70	1	5.17	6.89938	5.85045	-5.93588
71	217	71	0	4.13	11.5094	13.946	-11.812
72	217	72	1	5.14	22.1728	8.25013	-19.6922
73	217	73	1	3.58	3.2456	-2.40463	5.60284
74	217	74	0	4.26	-8.9698	-2.37986	16.2632
75	217	75	0	3.58	-6.82121	-18.8872	2.63972
76	217	76	1	4.91	-1.63113	-10.7099	-0.869773
77	217	77	0	5.31	5.94576	15.6988	-13.9687
78	217	78	0	5.05	-4.64342	-0.908674	4.34874
79	217	79	0	5.18	-3.76223	5.57817	-3.18382
80	217	80	1	4.32	8.46945	-8.13334	20.6433
81	217	81	1	5.17	-3.70057	1.01266	3.72432
82	217	82	0	3.98	1.51533	-16.9481	12.3027
83	217	83	1	4.11	-2.28818	-4.47455	-16.0231
84	217	84	1	5.29	14.5827	18.3414	-26.0853
85	217	85	0	5.1	1.87324	5.51346	-10.4879
86	217	86	0	4.86	5.71724	3.45288	-5.51037
87	217	87	1	5.44	0.8946	-2.41031	7.91653
88	217	88	1	5.23	-1.84576	-11.1398	9.1769
89	217	89	0	3.65	0.0689243	10.9074	0.905209
90	217	90	0	4.29	-4.4134	-11.0514	14.5939
91	217	91	1	4.73	0.804758	-0.860857	-3.54513
92	217	92	0	4.33	10.5364	2.29284	-4.62735
93	217	93	0	5.48	-0.571449	8.77182	-6.05916
94	217	94	1	4.25	5.26073	7.99133	0.790921
95	217	95	1	4.34	-0.461108	-4.05543	-0.959639
96	217	96	1	4.08	5.29806	5.02211	-6.75564
97	217	97	0	4.29	6.89265	-0.686215	-3.30042
98	217	98	0	4.71	10.3095	5.23847	-6.56942
99	217	99	0	3.59	9.10432	14.042	-13.021
0	218	0	1	4.44	-0.659195	-18.845	8.00285
1	218	1	0	3.63	13.1896	-1.26883	4.93314
2	218	2	0	4.11	1.63009	-10.4304	17.5266
3	218	3	0	4.91	11.6361	10.7059	-20.2911
4	218	4	0	3.56	1.90468	8.53023	-10.2848
5	218	5	1	5.25	-17.6025	-24.8694	10.1385
6	218	6	0	4.22	22.2312	16.4652	-7.51416
7	218	7	1	4.86	15.6305	-10.7633	-3.25902
8	218	8	1	5.48	9.88884	15.9847	-22.255
9	218	9	1	4.64	1.87581	1.16778	1.4265
10	218	10	0	4.98	11.6959	6.18796	-24.5149
11	218	11	0	3.94	38.4327	53.7942	-16.3293
12	218	12	0	4.09	-9.02619	-19.6974	36.1609
13	218	13	1	4.84	-12.9679	13.2097	-22.7807
14	218	14	1	5.01	3.27741	0.0582456	9.5914
15	218	15	1	4.18	15.0192	40.2799	-28.5524
16	218	16	1	5.03	-3.2064	13.2802	-8.91438
17	218	17	1	4.25	16.2974	-5.66145	-1.89188
18	218	18	0	3.92	4.08708	-4.69425	-3.0268
19	218	19	0	4.79	8.93864	1.89381	3.85802
20	218	20	0	5.48	15.2897	2.24417	-25.1439
21	218	21	0	3.72	-5.31697	-21.4639	5.80244
22	218	22	1	3.82	-5.51139	7.39716	-3.30813
23	218	23	0	4.9	7.97459	10.9911	-10.62
24	218	24	0	3.76	18.4563	18.2761	4.07738
25	218	25	1	4.23	20.9785	2.30249	6.49305
26	218	26	1	4.59	-20.1406	-36.5413	20.2849
27	218	27	0	4.09	-7.73215	-2.88337	-4.80191
28	218	28	0	5	8.97708	18.7184	-24.2479
29	218	29	1	5.05	-3.20429	-19.938	1.42843
30	218	30	0	5.46	5.73675	12.6161	0.588057
31	218	31	1	3.76	-9.10713	-5.63315	8.59246
32	218	32	0	3.85	-1.3697	20.615	-3.8557
33	218	33	1	4.46	4.90394	6.60826	1.06996
34	218	34	1	5.32	14.2065	2.43018	-10.4234
35	218	35	0	3.84	8.28482	16.6482	-11.4891
36	218	36	1	4.26	-14.3114	-4.52399	5.16354
37	218	37	1	3.85	-14.2709	-6.01329	5.0697
38	218	38	1	4.05	11.2086	-6.75682	3.77739
39	218	39	1	5.26	-1.96435	-28.1593	12.9896
40	218	40	0	4.18	-6.66651	-0.493266	3.31794
41	218	41	1	5.04	11.743	21.2739	-14.3216
42	218	42	1	4.75	8.14111	-7.25684	-0.0388879
43	218	43	1	4.8	-15.5905	3.33997	-1.27777
44	218	44	1	3.58	18.2207	-6.25542	-6.41104
45	218	45	0	4.34	21.975	6.38149	-11.4732
46	218	46	1	3.62	-0.24357	-12.8056	3.15483
47	218	47	1	5.26	13.3671	-20.0713	12.997
48	218	48	1	5.14	-11.3902	9.94188	0.637124
49	218	49	0	3.61	19.6821	-0.0429038	-5.71953
50	218	50	1	4.89	1.06844	-11.2677	-1.24308
51	218	51	1	4.68	-27.7658	1.47797	22.7502
52	218	52	1	5.12	-17.9811	1.16059	5.71594
53	218	53	0	4.69	2.73051	-19.611	1.2331
54	218	54	0	4.98	-16.1833	-7.37407	1.22649
55	218	55	0	4.46	-2.78455	11.3494	-9.82515
56	218	56	1	5.31	7.86861	21.2704	-12.3055
57	218	57	1	4.42	-6.91288	-18.2467	3.05045
58	218	58	0	4.32	-10.7732	-5.81632	3.17408
59	218	59	1	3.98	-13.5574	-20.1871	17.4988
60	218	60	1	3.83	-1.94168	6.03118	-2.65039
61	218	61	0	3.51	-18.7753	-11.5057	9.21266
62	218	62	0	4.24	-3.76451	-7.9394	22.6345
63	218	63	1	3.61	-6.04878	-19.2974	-0.320329
64	218	64	0	3.61	-7.27807	1.08961	-17.963
65	218	65	0	3.91	4.86284	55.1948	-19.201
66	218	66	0	5.24	-6.90311	5.0929	6.04839
67	218	67	0	4.57	-2.39792	21.1605	-5.73374
68	218	68	0	3.87	14.2385	37.3957	-17.9291
69	218	69	1	5.19	28.4591	23.523	-10.3033
70	218	70	0	5.29	-18.0952	-37.6978	19.7823
71	218	71	1	4.11	-2.40659	22.7808	-16.2716
72	218	72	1	3.61	-14.3878	1.51324	2.39407
73	218	73	0	3.61	-22.8964	3.01848	0.520397
74	218	74	0	4.95	-20.9807	4.91391	-3.4511
75	218	75	1	4.08	7.35253	-10.3158	6.15517
76	218	76	0	5.07	3.64974	-12.722	6.95527
77	218	77	1	5.43	-16.9961	-18.0052	12.149
78	218	78	0	4.04	6.28257	12.0402	8.84832
79	218	79	1	4.16	-3.2103	11.9785	-2.9189
80	218	80	1	4.91	4.23288	12.1743	-5.03461
81	218	81	0	5.12	30.3315	35.4736	-10.7418
82	218	82	0	3.54	26.0302	20.9738	-11.4931
83	218	83	0	4.3	10.2281	32.8932	-18.954
84	218	84	0	3.76	17.9894	21.6559	-15.9726
85	218	85	0	4.52	21.5402	25.121	-8.35111
86	218	86	0	4.23	13.9186	-3.74309	-15.014
87	218	87	0	5.06	20.431	3.48865	-18.2998
88	218	88	1	5.09	-12.3987	-8.33541	-3.02468
89	218	89	0	5.04	-15.4646	4.80815	-6.53897
90	218	90	0	4.97	-23.9913	-16.5192	2.22262
91	218	91	1	3.87	-2.49154	8.48858	-14.7549
92	218	92	1	4.16	14.4347	18.9092	7.02924
93	218	93	0	3.77	24.8371	37.4637	13.8889
94	218	94	1	4.11	-32.9333	-29.2515	48.7766
95	218	95	1	4.56	14.3241	20.14	-12.6318
96	218	96	0	5.28	-6.16006	-44.3258	41.3847
97	218	97	0	5.44	-6.72402	6.84489	-18.4779
98	218	98	1	3.84	-11.7643	27.4835	-24.1199
99	218	99	1	4.94	26.4986	27.7824	-21.6165
0	219	0	0	3.84	13.0077	-4.20203	14.2147
1	219	1	0	4	-0.705442	5.88404	9.21001
2	219	2	1	4.25	-0.736918	-7.01491	11.7509
3	219	3	0	3.79	1.78292	6.00019	-3.79371
4	219	4	0	4.23	-5.51081	-2.43761	0.150461
5	219	5	1	4.06	-2.48767	-5.09878	1.45055
6	219	6	0	5.46	3.24804	-16.0095	14.2599
7	219	7	1	4.99	7.79529	9.86228	-14.145
8	219	8	0	4.9	3.67446	-2.00119	-7.80706
9	219	9	0	4.9	-1.35265	-16.2174	10.7481
10	219	10	1	5.4	8.4439	6.47408	-20.606
11	219	11	0	3.59	13.5628	18.1641	-22.4189
12	219	12	1	4.49	16.5344	27.1168	-13.5089
13	219	13	1	4.45	5.26972	-20.3812	23.1353
14	219	14	1	3.99	4.61385	-9.83507	9.70183
15	219	15	0	5.26	7.23484	7.14652	-9.73551
16	219	16	1	5.01	-2.70891	10.2358	-2.82849
17	219	17	0	3.98	-5.75259	-11.2743	6.1013
18	219	18	1	4.94	0.381574	-4.36598	6.39216
19	219	19	1	5.24	10.4918	24.1038	7.93582
20	219	20	0	4.38	1.29103	-4.68646	-2.59893
21	219	21	0	5.32	-19.1381	-2.43066	6.09062
22	219	22	1	4.5	6.53067	-17.8055	-1.44022
23	219	23	0	5.45	3.96635	-0.373679	-10.2798
24	219	24	1	4.66	12.7927	-0.056651	-12.5991
25	219	25	0	5.43	-17.6426	-14.4502	5.54833
26	219	26	0	4.84	2.24347	-5.93365	4.61596
27	219	27	1	4.64	11.8263	3.87284	-2.28654
28	219	28	1	3.64	-11.756	-6.20164	11.3039
29	219	29	1	4.72	1.14255	-18.7966	-1.18792
30	219	30	0	3.65	1.86858	1.82119	-1.18421
31	219	31	1	4.69	6.4688	-7.0456	-0.637155
32	219	32	0	5.02	6.79172	4.51357	-7.33533
33	219	33	0	4.22	-3.50258	-2.20797	5.33935
34	219	34	0	4.92	-5.4493	-11.3343	4.08881
35	219	35	0	4.3	14.4403	12.4726	-7.74501
36	219	36	1	4.9	-10.6867	-20.2819	16.4433
37	219	37	1	4.92	-7.48507	-12.9297	8.09759
38	219	38	1	4.87	-4.64407	2.07276	-8.63829
39	219	39	1	4.87	15.4497	5.23527	-12.1485
40	219	40	0	5.47	0.703477	10.6844	-3.43008
41	219	41	1	4.97	-10.5027	-12.0622	6.32567
42	219	42	0	5.31	-7.17395	2.7361	3.80714
43	219	43	0	4.22	10.5198	4.24654	-9.73326
44	219	44	0	4.26	-0.844364	6.68227	21.6819
45	219	45	0	4.67	-7.30176	-15.3245	-1.5908
46	219	46	1	4.11	0.320541	-12.1142	-3.19654
47	219	47	1	3.7	-8.12482	-5.71391	2.75852
48	219	48	0	4.61	0.409036	0.1472	-1.7791
49	219	49	0	4.19	3.8428	2.92852	6.31227
50	219	50	0	4.7	3.63632	5.6551	-9.83158
51	219	51	1	4.53	11.8005	2.87236	-10.8607
52	219	52	1	3.82	-2.67861	7.00532	4.88315
53	219	53	0	3.65	0.0287984	-0.703299	-3.94157
54	219	54	0	5.08	-10.2734	-3.58969	9.11726
55	219	55	1	3.91	2.51553	2.86388	-0.820609
56	219	56	1	4.1	0.213443	-15.7272	15.3153
57	219	57	0	4.34	2.36894	-8.53046	5.88395
58	219	58	0	5.03	-4.12535	-8.78736	7.66555
59	219	59	0	4.01	9.1902	7.11505	-3.94239
60	219	60	1	3.55	11.7301	23.9696	-15.5012
61	219	61	1	4.06	4.80071	-5.29195	-4.51082
62	219	62	1	3.96	11.6703	-11.0961	-1.24616
63	219	63	1	3.78	4.65332	26.2192	-19.9737
64	219	64	0	4.29	-12.1577	-16.5241	20.216
65	219	65	1	3.98	5.48911	-1.17786	-0.863567
66	219	66	1	4.54	-3.65992	-11.4834	-1.52224
67	219	67	0	4.55	-0.691174	-0.92861	4.45013
68	219	68	1	4.8	8.89919	5.79602	-8.41442
69	219	69	0	4.3	8.42348	7.58904	1.30629
70	219	70	0	4.78	-10.3507	0.722516	13.8945
71	219	71	0	4.62	1.53351	-0.219771	-1.15398
72	219	72	1	5.07	1.4717	0.960681	-9.36371
73	219	73	0	4.45	-5.10139	-18.3821	-0.636777
74	219	74	1	4.47	14.6855	18.9844	-23.0169
75	219	75	1	3.93	-2.70482	0.0573642	-8.47866
76	219	76	0	5.16	10.2562	8.31862	-13.7003
77	219	77	0	3.62	-0.0891982	8.42374	-0.078997
78	219	78	1	3.53	4.0883	7.24061	12.4602
79	219	79	1	4.53	-0.379846	-15.0199	31.3772
80	219	80	0	4.02	-10.7793	-13.3166	29.5235
81	219	81	0	5.25	-23.5718	-32.6758	11.1993
82	219	82	0	5.04	2.37128	10.5283	-16.5099
83	219	83	1	4.74	9.86967	-9.52632	-2.68174
84	219	84	1	5.02	-2.16168	-6.67207	1.36417
85	219	85	0	4.42	-5.49751	11.8806	-4.88332
86	219	86	0	4.88	-5.63953	5.96939	7.49185
87	219	87	1	3.65	1.21251	11.9144	1.06857
88	219	88	1	3.6	3.45893	-42.9279	23.1131
89	219	89	1	5.16	6.68692	5.66122	-27.5946
90	219	90	1	4.71	7.12054	11.063	-18.0274
91	219	91	0	4.8	-2.90684	-3.09194	7.00716
92	219	92	1	5.17	-5.87089	-4.07167	6.12999
93	219	93	0	3.6	4.63961	4.15705	2.95466
94	219	94	0	4.84	-8.99408	-4.62536	5.78646
95	219	95	1	4.27	2.64592	-0.488476	-0.79472
96	219	96	1	3.79	4.2912	-1.49444	-7.89303
97	219	97	1	4	4.21761	7.46921	-1.22297
98	219	98	1	3.53	1.176	-4.54742	4.79767
99	219	99	0	4.54	4.57822	-0.88852	0.763169
0	220	0	1	4.68	0.0153451	-12.1585	25.9344
1	220	1	1	4.75	26.596	15.3005	3.54654
2	220	2	1	5.03	-13.281	-67.7922	39.9071
3	220	3	0	3.91	34.2241	11.0362	-41.1663
4	220	4	0	3.71	-1.19901	9.28282	-47.1451
5	220	5	1	4.01	23.1031	18.7379	2.3743
6	220	6	0	3.86	-6.98119	-66.1324	15.8978
7	220	7	0	4.39	28.1096	34.3648	-54.993
8	220	8	0	4.13	4.29119	22.2651	0.839694
9	220	9	1	5.32	19.2219	0.261178	10.0041
10	220	10	0	4.13	10.9764	15.0345	-32.8858
11	220	11	1	4.2	6.46694	31.2613	17.1525
12	220	12	1	3.52	-6.74897	-8.28038	16.648
13	220	13	1	5.28	-8.13519	16.2965	5.6243
14	220	14	1	4.8	13.9374	4.74575	-2.70524
15	220	15	0	4.78	3.144	-1.42038	11.9559
16	220	16	1	4.31	17.8865	-6.45573	-4.75254
17	220	17	0	4.24	43.6618	6.53379	-30.6079
18	220	18	1	3.58	15.801	42.4135	-24.0984
19	220	19	1	3.75	9.91196	-14.9668	10.5511
20	220	20	0	4.15	-2.84187	-1.0946	9.94812
21	220	21	1	3.68	15.9375	0.626208	7.0474
22	220	22	1	4.04	-5.23249	-4.99853	-12.766
23	220	23	1	4.72	-13.2812	-25.6272	14.3523
24	220	24	0	4.07	2.38488	0.286514	-37.0802
25	220	25	0	4.64	9.07935	26.4536	-18.5249
26	220	26	0	4.8	2.7964	-2.57526	4.63292
27	220	27	1	4.74	-13.5511	2.50845	6.383
28	220	28	0	4.19	-3.68134	-14.698	15.6983
29	220	29	1	4.93	8.8941	17.6934	-17.544
30	220	30	1	4.01	-30.433	-15.7125	16.0441
31	220	31	0	4.19	-2.9846	14.6801	4.07529
32	220	32	0	3.93	25.0667	9.72197	-5.30863
33	220	33	0	4.61	12.9755	7.9724	-15.5043
34	220	34	0	3.52	-15.4936	-12.8388	-0.743748
35	220	35	1	4.75	2.37403	19.8856	-26.8063
36	220	36	1	5.04	14.3549	16.6728	-2.2084
37	220	37	1	4.84	-11.0487	-18.1929	27.9311
38	220	38	0	5.19	-5.22785	8.48209	-2.65966
39	220	39	0	5.11	-8.27993	-25.938	-1.46833
40	220	40	1	3.95	-1.6423	15.4952	1.01145
41	220	41	0	3.65	-4.47422	18.6211	-4.16193
42	220	42	1	5.26	-12.1033	-14.0355	3.65498
43	220	43	1	5.45	14.2684	3.09864	-12.2893
44	220	44	1	3.59	8.1021	-3.35133	11.6552
45	220	45	1	4.78	-6.63845	-4.77376	-0.928485
46	220	46	0	5.06	-6.4844	7.00726	-4.79008
47	220	47	0	3.64	-9.13355	-11.801	8.42378
48	220	48	1	5.39	23.1858	-10.1813	2.52753
49	220	49	1	4.04	1.21633	6.49442	-7.96162
50	220	50	1	4.84	10.013	19.168	-11.2501
51	220	51	0	5.44	5.71451	13.5834	-17.1413
52	220	52	0	4.7	3.0064	-11.0602	5.12113
53	220	53	0	4.98	18.7762	19.1119	-6.50854
54	220	54	0	4.09	6.02654	7.21881	-11.794
55	220	55	1	4.34	0.48979	8.52085	-3.57245
56	220	56	0	5.22	-8.51886	-13.7419	-1.87945
57	220	57	0	3.51	8.97169	-4.02458	8.68278
58	220	58	0	4.48	-2.1333	-18.4122	15.7626
59	220	59	0	3.63	-6.13337	-5.92556	1.65893
60	220	60	0	4.82	-9.21282	-14.4599	-4.93035
61	220	61	0	5.06	-2.30511	19.2063	-11.852
62	220	62	1	4.69	15.481	-3.66484	-6.16124
63	220	63	0	5.31	5.73671	8.81991	1.96288
64	220	64	1	4.25	-18.5671	-20.3533	14.5434
65	220	65	1	5.13	15.8777	11.8227	-4.83491
66	220	66	0	5.21	-0.05036	-14.9067	13.0699
67	220	67	0	4.09	-4.91128	-8.97427	-16.6198
68	220	68	0	3.77	13.8751	8.44988	-13.7946
69	220	69	1	4.08	-24.6268	-1.65991	26.301
70	220	70	0	4.4	-8.96997	-11.852	18.1985
71	220	71	1	3.71	-6.7094	-17.7099	14.8648
72	220	72	1	5.21	3.58369	23.6227	-12.699
73	220	73	0	5.49	-1.90162	-34.8852	12.2346
74	220	74	1	4.14	3.19719	-10.989	-7.16424
75	220	75	0	5.47	-7.67335	-17.1241	19.084
76	220	76	0	4.74	14.8465	10.9987	-0.507869
77	220	77	0	5.15	-25.6203	-26.9294	18.0455
78	220	78	0	4.08	-1.43769	-17.0509	5.26666
79	220	79	1	4.18	8.27993	9.97432	-18.1577
80	220	80	1	4.61	-0.651695	15.0687	-30.7581
81	220	81	0	3.51	0.660677	-5.28637	-11.1338
82	220	82	1	3.5	-1.18705	24.0408	-24.4298
83	220	83	0	3.64	-10.5434	-11.1776	-1.09135
84	220	84	1	3.97	34.5142	28.151	-19.1659
85	220	85	1	5.45	-5.85742	-3.0514	23.84
86	220	86	0	4.19	-16.079	-11.4869	31.3687
87	220	87	1	4.44	-17.958	3.02333	22.1852
88	220	88	1	5.12	26.6417	8.07801	-4.55865
89	220	89	0	4.07	5.56829	-8.40642	-2.46568
90	220	90	0	4.83	17.7801	9.04178	-14.4497
91	220	91	0	4.53	10.172	20.0377	-37.9984
92	220	92	0	4.02	12.5571	11.2386	-8.36784
93	220	93	1	3.54	0.122917	8.56326	-3.71901
94	220	94	1	4.85	-8.23313	-4.68109	-5.2445
95	220	95	1	4.46	-5.81461	-3.25086	2.99916
96	220	96	1	4.55	-0.670713	-10.4436	13.332
97	220	97	1	5.25	-0.149954	-3.74276	-0.124314
98	220	98	0	4.93	23.9097	34.6482	-9.36257
99	220	99	1	4.66	-13.2805	-5.17806	-1.26035
