# Supplementary material for: Pupil dilation offers a time-window on prediction error
Source: eLife. 2026 Jan 8;14:RP105287. doi: 10.7554/eLife.105287 (PMC12782557; doi:10.7554/eLife.105287)
Supplement: Appendix 4—figure 1—source data 1. [file elife-105287-app4-fig1-data1.xlsx]

## Sheet: panel A raw + bp
	subject	correct	frequency	0	1	2	3	4	5	6	7	8	9	10	11	12	13	14	15	16	17	18	19	20	21	22	23	24	25	26	27	28	29	30	31	32	33	34	35	36	37	38	39	40	41	42	43	44	45
0	sub-1	0	20	-0.140426	-0.140998	-0.141792	-0.142806	-0.144038	-0.145483	-0.147137	-0.148993	-0.151041	-0.153272	-0.155675	-0.158235	-0.160939	-0.163769	-0.16671	-0.169742	-0.172846	-0.176002	-0.179189	-0.182384	-0.185566	-0.188712	-0.1918	-0.194807	-0.197709	-0.200484	-0.203109	-0.205562	-0.207821	-0.209865	-0.211673	-0.213227	-0.214508	-0.215499	-0.216185	-0.216552	-0.216588	-0.216282	-0.215626	-0.214613	-0.21324	-0.211503	-0.209404	-0.206943	-0.204125	-0.200956
1	sub-1	0	80	-0.0767107	-0.0857519	-0.0946858	-0.10348	-0.112102	-0.12052	-0.128705	-0.136628	-0.144263	-0.151585	-0.158574	-0.165212	-0.171486	-0.177387	-0.182907	-0.188045	-0.1928	-0.197178	-0.201182	-0.204822	-0.208108	-0.211048	-0.213655	-0.21594	-0.217914	-0.219587	-0.220968	-0.222067	-0.222891	-0.223447	-0.223741	-0.223776	-0.223556	-0.223084	-0.222361	-0.221391	-0.220173	-0.218712	-0.217008	-0.215066	-0.21289	-0.210482	-0.207849	-0.204994	-0.201923	-0.198643
2	sub-1	1	20	0.0935636	0.0873722	0.0807675	0.0738269	0.0666289	0.0592514	0.0517721	0.044267	0.0368106	0.0294748	0.0223287	0.0154384	0.00886602	0.00267007	-0.00309533	-0.00838065	-0.0131412	-0.0173373	-0.0209346	-0.0239045	-0.0262236	-0.0278744	-0.0288453	-0.0291301	-0.0287283	-0.0276446	-0.025889	-0.0234763	-0.0204258	-0.0167614	-0.0125107	-0.00770529	-0.00237997	0.0034273	0.00967588	0.0163227	0.0233225	0.0306283	0.0381918	0.0459636	0.0538935	0.0619308	0.0700251	0.078126	0.0861838	0.0941498
3	sub-1	1	80	0.611277	0.628385	0.643944	0.65794	0.670361	0.681202	0.690462	0.698144	0.704257	0.70881	0.71182	0.713305	0.713287	0.711791	0.708845	0.704481	0.698732	0.691633	0.683224	0.673544	0.662636	0.650545	0.637315	0.622995	0.607634	0.591281	0.573989	0.55581	0.536797	0.517005	0.496489	0.475303	0.453504	0.431147	0.408288	0.384981	0.36128	0.337239	0.312909	0.288341	0.263583	0.238681	0.213682	0.188626	0.163554	0.138504
0	sub-4	0	20	6.55221	6.56049	6.56783	6.57405	6.57898	6.58244	6.58424	6.58421	6.58216	6.57789	6.57121	6.56193	6.54987	6.53482	6.5166	6.49502	6.4699	6.44106	6.40833	6.37155	6.33056	6.28521	6.23536	6.18089	6.12169	6.05766	5.98871	5.91477	5.83581	5.75177	5.66267	5.56849	5.46927	5.36507	5.25594	5.14201	5.02337	4.90017	4.7726	4.64082	4.50507	4.36557	4.2226	4.07642	3.92734	3.77569
1	sub-4	0	80	-5.07886	-4.97702	-4.87707	-4.77895	-4.6826	-4.58793	-4.49483	-4.40316	-4.31278	-4.22351	-4.13519	-4.04763	-3.96063	-3.87399	-3.7875	-3.70095	-3.61414	-3.52686	-3.4389	-3.35008	-3.26019	-3.16905	-3.07651	-2.9824	-2.88658	-2.78891	-2.6893	-2.58763	-2.48383	-2.37782	-2.26957	-2.15903	-2.04619	-1.93105	-1.81364	-1.69399	-1.57216	-1.44824	-1.3223	-1.19447	-1.06488	-0.933672	-0.801006	-0.667059	-0.532023	-0.396103
2	sub-4	1	20	-32.463	-32.0146	-31.5378	-31.0335	-30.5025	-29.9457	-29.364	-28.7584	-28.1299	-27.4795	-26.8083	-26.1173	-25.4078	-24.681	-23.9379	-23.1798	-22.408	-21.6237	-20.8284	-20.0232	-19.2096	-18.3889	-17.5626	-16.7319	-15.8984	-15.0634	-14.2284	-13.3947	-12.5639	-11.7372	-10.9161	-10.102	-9.29612	-8.49981	-7.71431	-6.94083	-6.18055	-5.4346	-4.70406	-3.98997	-3.29332	-2.61507	-1.95611	-1.31728	-0.699385	-0.103149
3	sub-4	1	80	0.309922	0.364859	0.417793	0.468549	0.516958	0.562856	0.606088	0.646512	0.683992	0.718407	0.749649	0.777624	0.802256	0.823483	0.841262	0.85557	0.8664	0.873768	0.877705	0.878265	0.87552	0.869563	0.860506	0.848478	0.833629	0.816126	0.796155	0.773916	0.749628	0.723524	0.695849	0.666861	0.63683	0.606034	0.574756	0.543288	0.511923	0.480957	0.450682	0.421389	0.393364	0.366883	0.342214	0.319609	0.299309	0.281535
0	sub-5	0	20	-8.17075	-8.07508	-7.97758	-7.87837	-7.77757	-7.6753	-7.57169	-7.46685	-7.36092	-7.25401	-7.14624	-7.03774	-6.92863	-6.81902	-6.70903	-6.59879	-6.48842	-6.37804	-6.26777	-6.15772	-6.04802	-5.93879	-5.83014	-5.7222	-5.61509	-5.50892	-5.40383	-5.29994	-5.19737	-5.09625	-4.99671	-4.89888	-4.80286	-4.7088	-4.6168	-4.52697	-4.43942	-4.35425	-4.27154	-4.19136	-4.11377	-4.03882	-3.96652	-3.89689	-3.82992	-3.76557
1	sub-5	0	80	-5.39325	-5.21477	-5.03193	-4.84495	-4.65406	-4.45955	-4.26172	-4.06092	-3.8575	-3.65188	-3.44447	-3.23574	-3.02616	-2.81624	-2.6065	-2.39747	-2.1897	-1.98374	-1.78013	-1.57944	-1.3822	-1.18895	-1.00021	-0.816483	-0.63825	-0.465974	-0.30009	-0.141005	0.0109032	0.15529	0.291845	0.420294	0.540401	0.651967	0.754837	0.848893	0.934064	1.01032	1.07767	1.13619	1.18597	1.22717	1.25997	1.28461	1.30135	1.3105
2	sub-5	1	20	9.64539	9.44545	9.2275	8.99087	8.7349	8.459	8.16262	7.84529	7.5066	7.14619	6.76382	6.35932	5.93261	5.48373	5.01281	4.52008	4.00591	3.47078	2.91528	2.34014	1.74619	1.1344	0.50585	-0.138256	-0.796606	-1.46778	-2.15026	-2.84243	-3.54261	-4.24905	-4.95993	-5.67343	-6.3877	-7.1009	-7.8112	-8.51683	-9.21605	-9.90722	-10.5887	-11.2591	-11.917	-12.561	-13.19	-13.8029	-14.3987	-14.9766
3	sub-5	1	80	-5.83866	-5.79971	-5.7592	-5.71709	-5.67331	-5.62783	-5.5806	-5.53159	-5.48074	-5.42803	-5.37343	-5.31692	-5.25847	-5.19808	-5.13574	-5.07144	-5.00519	-4.937	-4.86689	-4.79487	-4.72097	-4.64524	-4.56771	-4.48843	-4.40748	-4.32491	-4.24081	-4.15526	-4.06836	-3.98022	-3.89094	-3.80064	-3.70946	-3.61751	-3.52494	-3.43188	-3.33848	-3.24488	-3.15124	-3.05771	-2.96445	-2.8716	-2.77934	-2.68782	-2.59719	-2.50761
0	sub-7	0	20	-0.367151	-0.42175	-0.471999	-0.517723	-0.558764	-0.594986	-0.626275	-0.652537	-0.6737	-0.689712	-0.700546	-0.706193	-0.706665	-0.701998	-0.692248	-0.677489	-0.65782	-0.633357	-0.604239	-0.57062	-0.532679	-0.490609	-0.444624	-0.394954	-0.341846	-0.285564	-0.226386	-0.164603	-0.100522	-0.0344585	0.0332602	0.102299	0.172316	0.242963	0.313892	0.384753	0.455198	0.524882	0.593468	0.660627	0.726038	0.789393	0.850396	0.908764	0.96423	1.01654
1	sub-7	0	80	0.0916569	0.148232	0.203023	0.255949	0.30694	0.355939	0.402898	0.447784	0.490573	0.531248	0.569805	0.606245	0.640578	0.672822	0.702997	0.731134	0.757264	0.781425	0.803657	0.824003	0.842509	0.859222	0.874188	0.887457	0.899075	0.909089	0.917545	0.924486	0.929955	0.933989	0.936626	0.9379	0.937839	0.936473	0.933823	0.929911	0.924754	0.918366	0.910758	0.90194	0.891916	0.880691	0.868268	0.854645	0.839823	0.823801
2	sub-7	1	20	1.7882	1.80025	1.80958	1.81589	1.81887	1.81821	1.81358	1.80466	1.79112	1.77262	1.74883	1.71945	1.68413	1.64259	1.59451	1.53962	1.47765	1.40835	1.33151	1.2469	1.15438	1.05379	0.945028	0.828026	0.702753	0.569219	0.427483	0.277649	0.119872	-0.0456411	-0.218628	-0.398771	-0.585693	-0.778963	-0.978084	-1.18251	-1.39162	-1.60474	-1.82115	-2.04007	-2.26064	-2.48199	-2.70318	-2.92321	-3.14108	-3.35573
3	sub-7	1	80	-0.278626	-0.264333	-0.250562	-0.237336	-0.224679	-0.212611	-0.201149	-0.190311	-0.18011	-0.170561	-0.161674	-0.153462	-0.145933	-0.139097	-0.13296	-0.127529	-0.122809	-0.118802	-0.11551	-0.112933	-0.111066	-0.109907	-0.109446	-0.109676	-0.110583	-0.112153	-0.114367	-0.117205	-0.120642	-0.124651	-0.129202	-0.134262	-0.139796	-0.145763	-0.152124	-0.158832	-0.165842	-0.173105	-0.18057	-0.188184	-0.195895	-0.203646	-0.211382	-0.219049	-0.226591	-0.233953
0	sub-9	0	20	0.400205	0.416419	0.429712	0.440216	0.448061	0.453381	0.456312	0.456989	0.455546	0.452117	0.446833	0.439824	0.431215	0.421129	0.409685	0.396995	0.383171	0.368316	0.352529	0.335905	0.318532	0.300493	0.281868	0.262728	0.243141	0.22317	0.202872	0.1823	0.161501	0.140519	0.119392	0.0981565	0.076842	0.0554762	0.0340834	0.0126846	-0.00870124	-0.0300576	-0.0513694	-0.0726232	-0.0938061	-0.114906	-0.135911	-0.15681	-0.177589	-0.198235
1	sub-9	0	80	0.599655	0.605392	0.611375	0.617573	0.623951	0.630475	0.637109	0.643819	0.650569	0.657321	0.664042	0.670694	0.677245	0.68366	0.689906	0.695952	0.701768	0.707325	0.712598	0.71756	0.722188	0.726463	0.730364	0.733875	0.73698	0.739667	0.741924	0.743743	0.745118	0.746043	0.746516	0.746537	0.746107	0.745229	0.743909	0.742153	0.73997	0.73737	0.734363	0.730962	0.727181	0.723034	0.718537	0.713706	0.708559	0.703115
2	sub-9	1	20	1.84309	1.83442	1.8248	1.81426	1.80285	1.79061	1.7776	1.7639	1.74957	1.73471	1.71942	1.7038	1.68796	1.67203	1.65613	1.64039	1.62496	1.60996	1.59555	1.58187	1.56906	1.55726	1.54661	1.53726	1.52932	1.52292	1.51817	1.51518	1.51402	1.51479	1.51753	1.5223	1.52911	1.53798	1.54891	1.56189	1.57689	1.59386	1.61274	1.63348	1.65598	1.68015	1.70589	1.73307	1.76156	1.79121
3	sub-9	1	80	-1.03091	-1.03989	-1.04983	-1.06073	-1.07258	-1.08535	-1.09903	-1.11358	-1.12894	-1.14509	-1.16195	-1.17948	-1.1976	-1.21625	-1.23535	-1.25482	-1.27458	-1.29452	-1.31456	-1.33459	-1.35451	-1.37419	-1.39353	-1.4124	-1.43067	-1.44822	-1.46493	-1.48065	-1.49526	-1.50863	-1.52063	-1.53114	-1.54003	-1.54719	-1.55248	-1.55581	-1.55707	-1.55615	-1.55297	-1.54744	-1.53947	-1.52901	-1.51599	-1.50037	-1.48212	-1.46119
0	sub-10	0	20	-2.33553	-2.30991	-2.27916	-2.24356	-2.20336	-2.15885	-2.11036	-2.05821	-2.00276	-1.94436	-1.88339	-1.82023	-1.75528	-1.68894	-1.6216	-1.55368	-1.48556	-1.41766	-1.35036	-1.28406	-1.21913	-1.15595	-1.09487	-1.03624	-0.980392	-0.92765	-0.87832	-0.832692	-0.791043	-0.753634	-0.720708	-0.692492	-0.669196	-0.651013	-0.638117	-0.630663	-0.628789	-0.632614	-0.642238	-0.657739	-0.679179	-0.706598	-0.740018	-0.779438	-0.82484	-0.876184
1	sub-10	0	80	-2.91265	-2.985	-3.05578	-3.12457	-3.19099	-3.25462	-3.31506	-3.37192	-3.42478	-3.47329	-3.51707	-3.55578	-3.58909	-3.61673	-3.63842	-3.65396	-3.66315	-3.66587	-3.66201	-3.65154	-3.63444	-3.61077	-3.5806	-3.54405	-3.5013	-3.45253	-3.398	-3.33796	-3.27272	-3.20259	-3.12793	-3.04908	-2.96642	-2.88033	-2.79121	-2.69942	-2.60538	-2.50945	-2.41202	-2.31347	-2.21415	-2.11441	-2.0146	-1.91504	-1.81603	-1.71787
2	sub-10	1	20	-2.18543	-2.18072	-2.17635	-2.17227	-2.16845	-2.16485	-2.16143	-2.15815	-2.15497	-2.15185	-2.14875	-2.14565	-2.14252	-2.13933	-2.13606	-2.1327	-2.12923	-2.12566	-2.12198	-2.11819	-2.11431	-2.11035	-2.10632	-2.10225	-2.09815	-2.09406	-2.09001	-2.08601	-2.0821	-2.07831	-2.07466	-2.07117	-2.06788	-2.06479	-2.06193	-2.0593	-2.0569	-2.05474	-2.0528	-2.05106	-2.04951	-2.04811	-2.04683	-2.04562	-2.04442	-2.04317
3	sub-10	1	80	0.158727	0.174528	0.189066	0.202263	0.214046	0.224349	0.233112	0.240283	0.245819	0.249683	0.251844	0.252282	0.250982	0.247938	0.243151	0.23663	0.228393	0.218461	0.206868	0.19365	0.178854	0.16253	0.144734	0.125529	0.10498	0.0831573	0.0601318	0.0359772	0.010768	-0.015421	-0.0425152	-0.0704408	-0.0991247	-0.128495	-0.158481	-0.189014	-0.220025	-0.25145	-0.283224	-0.315284	-0.347569	-0.38002	-0.412579	-0.445188	-0.477792	-0.510336
0	sub-11	0	20	1.63294	1.63613	1.63943	1.64283	1.64634	1.64995	1.65368	1.65751	1.66145	1.66551	1.66967	1.67394	1.67832	1.68281	1.68741	1.69213	1.69695	1.70189	1.70694	1.71211	1.71739	1.72278	1.72829	1.73392	1.73966	1.74553	1.7515	1.75759	1.76379	1.7701	1.77651	1.78302	1.78963	1.79633	1.8031	1.80995	1.81686	1.82381	1.8308	1.83781	1.84481	1.8518	1.85875	1.86564	1.87243	1.8791
1	sub-11	0	80	0.118843	0.123007	0.126718	0.129999	0.132873	0.135367	0.137507	0.13932	0.140835	0.142078	0.143077	0.143858	0.144447	0.144868	0.145143	0.145294	0.145339	0.145294	0.145175	0.144993	0.144759	0.144479	0.144159	0.143803	0.14341	0.142981	0.142512	0.142	0.141438	0.140821	0.140141	0.13939	0.138561	0.137647	0.13664	0.135534	0.134325	0.133007	0.131578	0.130036	0.128379	0.126609	0.124728	0.122739	0.120645	0.118455
2	sub-11	1	20	-0.558417	-0.555514	-0.551667	-0.54694	-0.541398	-0.535105	-0.528125	-0.520522	-0.512359	-0.503697	-0.494592	-0.485103	-0.475283	-0.465181	-0.454846	-0.444324	-0.433657	-0.422885	-0.412046	-0.401177	-0.39031	-0.37948	-0.368718	-0.358052	-0.347513	-0.337128	-0.326924	-0.316929	-0.307167	-0.297664	-0.288443	-0.279527	-0.270939	-0.262699	-0.254828	-0.247344	-0.240265	-0.233607	-0.227385	-0.221613	-0.216305	-0.21147	-0.207118	-0.203258	-0.199894	-0.197031
3	sub-11	1	80	-0.00720203	-0.00460484	-0.00199371	0.000671432	0.00343198	0.0063301	0.00940816	0.0127083	0.0162718	0.020139	0.0243482	0.0289359	0.0339357	0.0393786	0.045292	0.0516995	0.0586209	0.0660714	0.0740616	0.0825974	0.0916793	0.101303	0.111458	0.12213	0.133298	0.144937	0.157014	0.169494	0.182335	0.19549	0.20891	0.222539	0.236318	0.250183	0.26407	0.27791	0.291632	0.305166	0.318438	0.331377	0.343912	0.355972	0.367489	0.378397	0.388634	0.398138
0	sub-12	0	20	0.715072	0.766438	0.814622	0.85981	0.902198	0.941993	0.979406	1.01465	1.04793	1.07946	1.10943	1.13804	1.16545	1.19184	1.21734	1.24209	1.26621	1.2898	1.31295	1.33574	1.35822	1.38046	1.40248	1.42433	1.44601	1.46753	1.48891	1.51012	1.53117	1.55202	1.57266	1.59306	1.61316	1.63295	1.65237	1.67137	1.68992	1.70795	1.72541	1.74224	1.75839	1.77381	1.78842	1.80218	1.81503	1.82691
1	sub-12	0	80	-2.95758	-2.85227	-2.7449	-2.63603	-2.52624	-2.41609	-2.30619	-2.19714	-2.08952	-1.98392	-1.88094	-1.78113	-1.68507	-1.59328	-1.50628	-1.42457	-1.34861	-1.27883	-1.21562	-1.15935	-1.11034	-1.06886	-1.03515	-1.00937	-0.991667	-0.982119	-0.980754	-0.98755	-1.00243	-1.02528	-1.05592	-1.09413	-1.13964	-1.19215	-1.25132	-1.31676	-1.38804	-1.46473	-1.54635	-1.63239	-1.72232	-1.81561	-1.91169	-2.00999	-2.10992	-2.21089
2	sub-12	1	20	2.55215	2.1697	1.78721	1.40582	1.02665	0.650853	0.279543	-0.0861756	-0.445221	-0.796543	-1.13912	-1.47199	-1.7942	-2.10487	-2.40319	-2.68839	-2.95977	-3.2167	-3.45865	-3.68516	-3.89586	-4.09048	-4.26884	-4.43088	-4.57662	-4.70618	-4.81977	-4.91771	-5.00037	-5.06821	-5.12176	-5.16158	-5.1883	-5.20257	-5.20505	-5.19645	-5.17745	-5.14875	-5.11104	-5.06499	-5.01124	-4.95044	-4.88317	-4.81	-4.73144	-4.64799
3	sub-12	1	80	-0.450341	-0.500597	-0.554593	-0.612324	-0.673778	-0.738931	-0.807749	-0.880183	-0.956172	-1.03564	-1.1185	-1.20464	-1.29395	-1.38627	-1.48146	-1.57934	-1.67971	-1.78238	-1.88709	-1.99362	-2.10168	-2.211	-2.32128	-2.43218	-2.54337	-2.65452	-2.76524	-2.87516	-2.9839	-3.09105	-3.19623	-3.29901	-3.39898	-3.49572	-3.58883	-3.67788	-3.76246	-3.84217	-3.9166	-3.98539	-4.04813	-4.10449	-4.15411	-4.19668	-4.23189	-4.25947
0	sub-13	0	20	4.33491	4.34412	4.35292	4.36116	4.36871	4.37542	4.38116	4.38575	4.38905	4.3909	4.39113	4.38957	4.38605	4.38041	4.37248	4.36207	4.34903	4.33319	4.31438	4.29243	4.26718	4.23849	4.2062	4.17017	4.13026	4.08635	4.03833	3.98609	3.92953	3.86859	3.8032	3.73332	3.6589	3.57996	3.49649	3.40852	3.31611	3.21933	3.11828	3.01307	2.90386	2.7908	2.6741	2.55396	2.43063	2.30436
1	sub-13	0	80	0.684334	0.680166	0.676087	0.672093	0.668182	0.66435	0.660594	0.656908	0.653286	0.649723	0.646211	0.642743	0.639309	0.635902	0.632511	0.629127	0.62574	0.622341	0.61892	0.615469	0.61198	0.608445	0.604859	0.601217	0.597516	0.593753	0.589929	0.586043	0.582099	0.578099	0.574049	0.569955	0.565824	0.561667	0.557493	0.553315	0.549147	0.545001	0.540896	0.536848	0.532874	0.528995	0.525229	0.521598	0.518122	0.514823
2	sub-13	1	20	0.356964	0.351821	0.345555	0.338226	0.329896	0.320635	0.310519	0.29963	0.288053	0.275878	0.263199	0.250113	0.236718	0.223113	0.209397	0.195669	0.182024	0.168554	0.155348	0.142489	0.130056	0.118119	0.106743	0.0959838	0.0858893	0.0764981	0.0678395	0.0599337	0.0527911	0.0464124	0.0407889	0.0359026	0.0317263	0.028224	0.0253512	0.0230553	0.0212762	0.0199465	0.0189924	0.0183346	0.0178889	0.0175673	0.017279	0.0169315	0.0164314	0.0156859
3	sub-13	1	80	-0.139064	-0.10994	-0.0807652	-0.0517025	-0.0229105	0.00545865	0.0332599	0.060356	0.0866184	0.111928	0.136173	0.159255	0.18108	0.201569	0.22065	0.238261	0.254351	0.268879	0.281814	0.293137	0.302836	0.31091	0.317366	0.32222	0.325494	0.327216	0.327419	0.326144	0.323432	0.319329	0.313884	0.30715	0.29918	0.290029	0.279755	0.268416	0.256072	0.242783	0.228612	0.213621	0.197875	0.181441	0.164385	0.146776	0.128685	0.110185
0	sub-14	0	20	-0.606013	-0.711705	-0.817532	-0.923371	-1.0291	-1.1346	-1.23973	-1.34437	-1.44836	-1.55155	-1.65377	-1.75485	-1.85459	-1.95279	-2.04925	-2.14373	-2.23599	-2.3258	-2.41288	-2.49695	-2.57774	-2.65496	-2.72829	-2.79743	-2.8621	-2.92198	-2.97679	-3.02627	-3.07016	-3.10824	-3.14032	-3.16623	-3.18584	-3.19905	-3.2058	-3.20605	-3.19983	-3.18717	-3.16814	-3.14286	-3.11145	-3.07409	-3.03095	-2.98224	-2.9282	-2.86907
1	sub-14	0	80	1.56243	1.58253	1.6105	1.6454	1.68617	1.73168	1.78069	1.83191	1.88399	1.93553	1.98513	2.03137	2.07285	2.10816	2.13597	2.15496	2.16389	2.16158	2.14693	2.11893	2.07666	2.01932	1.9462	1.85671	1.75038	1.62687	1.48595	1.32752	1.15162	0.958377	0.748067	0.521063	0.277844	0.0189838	-0.254852	-0.542916	-0.844387	-1.15837	-1.48392	-1.82001	-2.16558	-2.5195	-2.88063	-3.24777	-3.61966	-3.99506
2	sub-14	1	20	51.094	51.3495	51.5874	51.8048	51.9983	52.1647	52.3006	52.4024	52.4664	52.4887	52.4656	52.393	52.267	52.0835	51.8384	51.5277	51.1472	50.6931	50.1612	49.5479	48.8494	48.0621	47.1826	46.2078	45.1345	43.9603	42.6826	41.2994	39.809	38.2099	36.5013	34.6826	32.7538	30.7153	28.568	26.3133	23.9533	21.4905	18.928	16.2694	13.5191	10.6818	7.76284	4.76827	1.70454	-1.42137
3	sub-14	1	80	1.25213	1.28344	1.31235	1.33907	1.36384	1.38689	1.40847	1.42882	1.4482	1.46683	1.48497	1.50282	1.52059	1.53846	1.55661	1.57517	1.59424	1.6139	1.63421	1.65517	1.67675	1.69889	1.72151	1.74446	1.76759	1.7907	1.81358	1.83597	1.85762	1.87823	1.89752	1.91516	1.93084	1.94423	1.95502	1.96289	1.96752	1.9686	1.96585	1.95898	1.94774	1.93189	1.9112	1.8855	1.85462	1.81843
0	sub-15	0	20	-3.32135	-3.54975	-3.77766	-4.00474	-4.23058	-4.45478	-4.67687	-4.89635	-5.11271	-5.32538	-5.53379	-5.73734	-5.9354	-6.12735	-6.31253	-6.49032	-6.66007	-6.82115	-6.97296	-7.1149	-7.24642	-7.36697	-7.47607	-7.57326	-7.65812	-7.73031	-7.78951	-7.83548	-7.86801	-7.88698	-7.89232	-7.88402	-7.86214	-7.8268	-7.77819	-7.71654	-7.64217	-7.55544	-7.45677	-7.34661	-7.22549	-7.09396	-6.95258	-6.80199	-6.64281	-6.47571
1	sub-15	0	80	0.725415	0.689177	0.659621	0.636727	0.620405	0.610492	0.606757	0.608902	0.616565	0.62933	0.646729	0.668254	0.693362	0.721487	0.752046	0.784448	0.818098	0.852408	0.886801	0.920716	0.953615	0.984987	1.01435	1.04127	1.06534	1.0862	1.10354	1.1171	1.12666	1.13207	1.13321	1.13004	1.12255	1.1108	1.09487	1.07493	1.05117	1.02382	0.993153	0.959475	0.92312	0.884443	0.843813	0.801608	0.758205	0.713977
2	sub-15	1	20	2.22964	2.1751	2.11003	2.03388	1.94609	1.84616	1.7336	1.60794	1.46876	1.31568	1.14837	0.966539	0.769957	0.558449	0.331902	0.0902737	-0.166411	-0.438051	-0.724464	-1.02539	-1.34047	-1.66927	-2.01125	-2.36579	-2.73216	-3.10955	-3.49702	-3.89357	-4.29807	-4.70934	-5.12608	-5.5469	-5.97035	-6.3949	-6.81895	-7.24085	-7.65889	-8.07134	-8.47642	-8.87238	-9.25743	-9.62983	-9.98785	-10.3298	-10.6541	-10.9592
3	sub-15	1	80	-3.49592	-3.57183	-3.64324	-3.70986	-3.77142	-3.82763	-3.87826	-3.92308	-3.96188	-3.99447	-4.02069	-4.04042	-4.05352	-4.05993	-4.05959	-4.05245	-4.03852	-4.01782	-3.99037	-3.95627	-3.91559	-3.86844	-3.81498	-3.75534	-3.68971	-3.61829	-3.54129	-3.45895	-3.37151	-3.27922	-3.18237	-3.08124	-2.9761	-2.86726	-2.755	-2.63964	-2.52146	-2.40078	-2.27789	-2.1531	-2.02671	-1.89902	-1.77031	-1.6409	-1.51106	-1.38109
0	sub-16	0	20	-1.9392	-1.86258	-1.7843	-1.70465	-1.62392	-1.54241	-1.46038	-1.37813	-1.29594	-1.21406	-1.13275	-1.05226	-0.97281	-0.894623	-0.817896	-0.742814	-0.669544	-0.598241	-0.529038	-0.462058	-0.397402	-0.335161	-0.275406	-0.218197	-0.163578	-0.111579	-0.0622163	-0.0154955	0.0285909	0.0700617	0.108946	0.145282	0.179119	0.210513	0.23953	0.26624	0.290721	0.313059	0.333342	0.351663	0.368121	0.382816	0.39585	0.407329	0.417359	0.426048
1	sub-16	0	80	-0.650179	-0.584244	-0.523038	-0.466446	-0.414339	-0.366581	-0.323024	-0.283516	-0.247894	-0.215993	-0.187641	-0.162664	-0.140885	-0.122127	-0.10621	-0.0929558	-0.0821873	-0.0737286	-0.0674066	-0.063051	-0.0604953	-0.0595773	-0.0601392	-0.0620286	-0.0650983	-0.0692073	-0.0742204	-0.0800093	-0.0864519	-0.0934332	-0.100845	-0.108586	-0.116561	-0.124683	-0.132871	-0.141052	-0.149157	-0.157126	-0.164902	-0.172438	-0.179688	-0.186614	-0.193183	-0.199365	-0.205136	-0.210473
2	sub-16	1	20	1.83755	1.75549	1.66286	1.55933	1.44461	1.31842	1.18055	1.0308	0.869048	0.695194	0.509205	0.311098	0.100949	-0.121107	-0.354869	-0.600074	-0.856388	-1.12341	-1.40067	-1.68763	-1.98366	-2.2881	-2.60017	-2.91906	-3.24388	-3.57366	-3.9074	-4.24402	-4.58239	-4.92135	-5.25969	-5.59617	-5.92953	-6.25852	-6.58185	-6.89827	-7.20654	-7.50544	-7.7938	-8.07047	-8.33436	-8.58442	-8.81968	-9.03921	-9.24215	-9.4277
3	sub-16	1	80	-0.0675129	-0.0543718	-0.0422237	-0.0310527	-0.0208392	-0.0115609	-0.00319228	0.00429494	0.0109315	0.0167507	0.0217878	0.02608	0.029666	0.0325858	0.0348802	0.0365907	0.0377586	0.0384251	0.0386306	0.0384142	0.0378131	0.0368624	0.0355944	0.0340381	0.0322189	0.0301587	0.0278753	0.0253832	0.0226929	0.0198121	0.0167454	0.0134953	0.0100628	0.00644801	0.0026505	-0.00132976	-0.00549214	-0.00983481	-0.0143543	-0.0190455	-0.0239007	-0.0289102	-0.0340617	-0.0393404	-0.0447287	-0.0502068
0	sub-18	0	20	2.93806	2.97239	3.00465	3.03474	3.06254	3.08788	3.11062	3.13057	3.14755	3.16134	3.17172	3.17848	3.18138	3.18017	3.17462	3.16447	3.14948	3.12942	3.10403	3.07309	3.03637	2.99366	2.94476	2.88947	2.82764	2.7591	2.68373	2.60141	2.51207	2.41564	2.3121	2.20144	2.08369	1.95892	1.82721	1.68871	1.54358	1.39201	1.23425	1.07057	0.901292	0.726761	0.547367	0.363534	0.175722	-0.0155784
1	sub-18	0	80	-21.2407	-21.2495	-21.26	-21.2724	-21.2866	-21.3027	-21.3207	-21.3407	-21.3625	-21.3864	-21.4122	-21.4401	-21.47	-21.5019	-21.5359	-21.572	-21.6101	-21.6503	-21.6925	-21.7368	-21.7831	-21.8313	-21.8814	-21.9333	-21.987	-22.0423	-22.0991	-22.1574	-22.2168	-22.2773	-22.3386	-22.4005	-22.4628	-22.5251	-22.5871	-22.6486	-22.709	-22.768	-22.8252	-22.8801	-22.9321	-22.9807	-23.0253	-23.0653	-23.1001	-23.129
2	sub-18	1	20	0.0338333	0.0421384	0.051212	0.0610146	0.0714994	0.0826121	0.0942915	0.10647	0.119075	0.132026	0.14524	0.158629	0.172102	0.185563	0.198915	0.212057	0.224891	0.237312	0.249221	0.260515	0.271097	0.28087	0.289739	0.297618	0.304423	0.310076	0.314508	0.317657	0.319468	0.3199	0.318917	0.316495	0.31262	0.307289	0.300508	0.292294	0.282673	0.271682	0.259365	0.245778	0.230982	0.215048	0.19805	0.180068	0.161185	0.141486
3	sub-18	1	80	1.568	1.49616	1.42483	1.35408	1.28394	1.21446	1.14566	1.07755	1.01015	0.943461	0.877467	0.812156	0.747506	0.68349	0.620075	0.557222	0.494893	0.433044	0.371632	0.310613	0.249944	0.189582	0.129489	0.0696271	0.00996125	-0.0495391	-0.108901	-0.16815	-0.227305	-0.286384	-0.345402	-0.404369	-0.463294	-0.522179	-0.581024	-0.639823	-0.698563	-0.757225	-0.815783	-0.874202	-0.932439	-0.990442	-1.04815	-1.10549	-1.1624	-1.21877
0	sub-19	0	20	-4.45173	-4.36232	-4.27155	-4.17953	-4.08636	-3.99214	-3.89696	-3.80092	-3.70409	-3.60654	-3.50835	-3.40957	-3.31025	-3.21045	-3.11019	-3.00951	-2.90844	-2.807	-2.70521	-2.60308	-2.50064	-2.39789	-2.29486	-2.19156	-2.08801	-1.98424	-1.88028	-1.77615	-1.6719	-1.56758	-1.46322	-1.35889	-1.25465	-1.15058	-1.04673	-0.943206	-0.840082	-0.737448	-0.635401	-0.534038	-0.433462	-0.333779	-0.235102	-0.137545	-0.0412267	0.0537319
1	sub-19	0	80	-6.84564	-6.92983	-7.0015	-7.06065	-7.10732	-7.14164	-7.16383	-7.17414	-7.17289	-7.16047	-7.13728	-7.10381	-7.06055	-7.00804	-6.94682	-6.87749	-6.80061	-6.71678	-6.6266	-6.53066	-6.42953	-6.3238	-6.21401	-6.10068	-5.98432	-5.8654	-5.74436	-5.62162	-5.49755	-5.37251	-5.2468	-5.1207	-4.99447	-4.86833	-4.74249	-4.6171	-4.49233	-4.36831	-4.24517	-4.123	-4.00192	-3.88201	-3.76339	-3.64613	-3.53034	-3.41613
2	sub-19	1	20	3.67822	3.6747	3.67058	3.66588	3.66059	3.65474	3.64833	3.64139	3.63394	3.62601	3.61762	3.6088	3.59961	3.59007	3.58024	3.57016	3.55989	3.54948	3.539	3.52851	3.51808	3.50778	3.49769	3.48789	3.47845	3.46945	3.46099	3.45315	3.446	3.43965	3.43419	3.42968	3.42623	3.42392	3.42284	3.42306	3.42467	3.42775	3.43236	3.43858	3.44647	3.45609	3.4675	3.48074	3.49585	3.51287
3	sub-19	1	80	-2.99122	-3.01245	-3.03109	-3.04714	-3.06062	-3.07153	-3.07993	-3.08586	-3.08937	-3.09053	-3.08942	-3.08612	-3.0807	-3.07327	-3.06392	-3.05274	-3.03984	-3.02532	-3.00927	-2.99179	-2.97299	-2.95296	-2.93178	-2.90956	-2.88638	-2.86233	-2.8375	-2.81199	-2.78588	-2.75927	-2.73227	-2.70497	-2.67748	-2.6499	-2.62235	-2.59494	-2.56776	-2.54094	-2.51458	-2.48878	-2.46364	-2.43928	-2.41577	-2.39321	-2.3717	-2.3513
0	sub-20	0	20	-1.17184	-1.17171	-1.17299	-1.17568	-1.17974	-1.18516	-1.19191	-1.19995	-1.20926	-1.21978	-1.23148	-1.24431	-1.2582	-1.2731	-1.28895	-1.30568	-1.32321	-1.34148	-1.36041	-1.3799	-1.39989	-1.42028	-1.44099	-1.46193	-1.48303	-1.50419	-1.52534	-1.54641	-1.56732	-1.58802	-1.60843	-1.62852	-1.64823	-1.66752	-1.68636	-1.70471	-1.72254	-1.73983	-1.75656	-1.77269	-1.7882	-1.80309	-1.81732	-1.83088	-1.84375	-1.85589
1	sub-20	0	80	2.67001	2.73636	2.79749	2.85353	2.90461	2.95089	2.99254	3.02974	3.06266	3.09151	3.11648	3.13776	3.15557	3.17009	3.18154	3.1901	3.19597	3.19932	3.20035	3.19921	3.19607	3.19108	3.18437	3.17608	3.16631	3.15519	3.14279	3.12919	3.11447	3.09869	3.08188	3.06408	3.04532	3.02561	3.00495	2.98335	2.96079	2.93725	2.91272	2.88715	2.86053	2.8328	2.80395	2.77391	2.74267	2.71018
2	sub-20	1	20	-0.883098	-0.892507	-0.902266	-0.912392	-0.922904	-0.93382	-0.945156	-0.956929	-0.969156	-0.981851	-0.995025	-1.00869	-1.02285	-1.0375	-1.05266	-1.06831	-1.08444	-1.10105	-1.1181	-1.13557	-1.15343	-1.17165	-1.19017	-1.20894	-1.22791	-1.24701	-1.26616	-1.28528	-1.30428	-1.32308	-1.34157	-1.35964	-1.37718	-1.39408	-1.41021	-1.42546	-1.4397	-1.45281	-1.46466	-1.47514	-1.48412	-1.49151	-1.49719	-1.50107	-1.50306	-1.50309
3	sub-20	1	80	1.42061	1.45654	1.49193	1.52659	1.56033	1.59295	1.62427	1.65411	1.68229	1.70863	1.73295	1.75509	1.7749	1.79221	1.80689	1.81879	1.8278	1.83379	1.83665	1.8363	1.83263	1.82558	1.81508	1.80109	1.78356	1.76246	1.73779	1.70954	1.67773	1.64237	1.60351	1.56118	1.51544	1.46637	1.41403	1.35851	1.2999	1.23831	1.17384	1.1066	1.03672	0.964317	0.889528	0.812486	0.733333	0.652216
0	sub-21	0	20	-2.19531	-2.27195	-2.34389	-2.41096	-2.47298	-2.52981	-2.58132	-2.62743	-2.66805	-2.70315	-2.7327	-2.75671	-2.77523	-2.78831	-2.79606	-2.79858	-2.79604	-2.78858	-2.77641	-2.75973	-2.73876	-2.71374	-2.6849	-2.65251	-2.61681	-2.57806	-2.53651	-2.49242	-2.44602	-2.39755	-2.34723	-2.29529	-2.24193	-2.18734	-2.13172	-2.07523	-2.01804	-1.96031	-1.90218	-1.84377	-1.78523	-1.72667	-1.66819	-1.60991	-1.55191	-1.49429
1	sub-21	0	80	-2.09687	-2.31072	-2.53229	-2.76117	-2.99687	-3.23887	-3.48658	-3.7394	-3.99663	-4.25756	-4.52141	-4.78737	-5.05459	-5.32218	-5.5892	-5.8547	-6.1177	-6.3772	-6.63218	-6.88161	-7.12447	-7.35971	-7.5863	-7.80321	-8.00944	-8.20398	-8.38585	-8.55412	-8.70787	-8.84623	-8.96838	-9.07353	-9.161	-9.23014	-9.28038	-9.31125	-9.32237	-9.31342	-9.28422	-9.23466	-9.16476	-9.07463	-8.96449	-8.83466	-8.6856	-8.51783
2	sub-21	1	20	2.02088	2.15233	2.28419	2.41588	2.54684	2.67649	2.80431	2.92978	3.05242	3.17177	3.28741	3.39894	3.50602	3.60831	3.70553	3.79745	3.88384	3.96455	4.03942	4.10838	4.17135	4.22831	4.27927	4.32428	4.3634	4.39676	4.42448	4.44673	4.4637	4.4756	4.48266	4.48515	4.48334	4.47751	4.46797	4.45504	4.43904	4.4203	4.39917	4.376	4.35112	4.3249	4.29767	4.2698	4.24161	4.21346
3	sub-21	1	80	-4.17055	-4.17053	-4.16789	-4.16244	-4.15399	-4.14238	-4.12743	-4.10901	-4.08697	-4.0612	-4.03159	-3.99805	-3.96051	-3.91892	-3.87323	-3.82343	-3.76952	-3.71151	-3.64944	-3.58334	-3.51331	-3.4394	-3.36174	-3.28042	-3.19559	-3.10739	-3.01599	-2.92155	-2.82427	-2.72434	-2.62198	-2.5174	-2.41083	-2.3025	-2.19265	-2.08152	-1.96935	-1.85639	-1.74288	-1.62906	-1.51518	-1.40147	-1.28818	-1.17553	-1.06375	-0.953063
0	sub-23	0	20	8.41951	8.38178	8.33562	8.28073	8.21686	8.14378	8.06131	7.96933	7.86772	7.75645	7.63551	7.50494	7.36482	7.21529	7.05654	6.88879	6.7123	6.52741	6.33447	6.13388	5.92609	5.71156	5.49082	5.2644	5.03288	4.79684	4.55692	4.31375	4.06799	3.82034	3.57149	3.32215	3.07306	2.82494	2.57855	2.33466	2.09403	1.85743	1.62565	1.39946	1.17966	0.967026	0.762336	0.566366	0.379879	0.203625
1	sub-23	0	80	6.97853	6.88779	6.80022	6.71577	6.63436	6.5559	6.48024	6.40723	6.33669	6.26841	6.20217	6.13772	6.0748	6.01312	5.95239	5.89232	5.83258	5.77286	5.71283	5.65215	5.5905	5.52753	5.46291	5.39629	5.32736	5.25577	5.18122	5.10342	5.02207	4.93693	4.84776	4.75436	4.65657	4.55427	4.44739	4.33588	4.21979	4.09919	3.97424	3.84512	3.71212	3.57556	3.43582	3.29337	3.1487	3.00236
2	sub-23	1	20	-14.9072	-14.6161	-14.3066	-13.9801	-13.6379	-13.2815	-12.9121	-12.5314	-12.1406	-11.7412	-11.3346	-10.9223	-10.5055	-10.0856	-9.66397	-9.24173	-8.82009	-8.40016	-7.98299	-7.56954	-7.16067	-6.75716	-6.35972	-5.96893	-5.5853	-5.20921	-4.841	-4.48088	-4.12902	-3.78548	-3.4503	-3.12341	-2.80475	-2.49419	-2.19156	-1.89668	-1.60933	-1.32929	-1.0563	-0.790118	-0.53047	-0.277096	-0.0297362	0.21186	0.447931	0.678698
3	sub-23	1	80	-2.00729	-1.75649	-1.49986	-1.23801	-0.971547	-0.701136	-0.427458	-0.15122	0.126847	0.405992	0.685448	0.964433	1.24216	1.51782	1.79062	2.05976	2.32443	2.58386	2.83725	3.08384	3.32288	3.55365	3.77544	3.98759	4.18946	4.38044	4.55998	4.72756	4.8827	5.02499	5.15404	5.26954	5.37122	5.45888	5.53235	5.59154	5.63643	5.66702	5.68342	5.68577	5.67425	5.64912	5.61069	5.55931	5.49537	5.41932
0	sub-24	0	20	4.26949	4.23842	4.20022	4.15458	4.10118	4.03972	3.96991	3.89147	3.80412	3.70763	3.60176	3.48631	3.36112	3.22604	3.08098	2.92587	2.76069	2.58547	2.40029	2.20529	2.00064	1.7866	1.56346	1.33159	1.09141	0.843404	0.588121	0.326167	0.0582066	-0.215036	-0.492784	-0.774207	-1.05843	-1.34453	-1.63157	-1.91854	-2.20445	-2.48828	-2.76898	-3.04554	-3.31692	-3.58213	-3.84016	-4.09007	-4.33093	-4.56186
1	sub-24	0	80	2.41924	2.39337	2.3677	2.34233	2.31736	2.29291	2.26909	2.24602	2.22381	2.20259	2.18248	2.16358	2.14601	2.12987	2.11525	2.10223	2.09088	2.08126	2.07342	2.06738	2.06318	2.06082	2.06031	2.06163	2.06476	2.06969	2.07637	2.08475	2.0948	2.10644	2.1196	2.13422	2.15019	2.16744	2.18585	2.20532	2.22573	2.24696	2.26889	2.29138	2.3143	2.33751	2.36086	2.38422	2.40744	2.43036
2	sub-24	1	20	-1.31946	-1.32977	-1.33523	-1.33652	-1.33438	-1.32955	-1.32279	-1.31485	-1.30649	-1.29844	-1.29142	-1.28611	-1.28314	-1.28309	-1.2865	-1.29383	-1.30547	-1.32174	-1.34287	-1.36905	-1.40036	-1.4368	-1.47833	-1.52479	-1.576	-1.63167	-1.6915	-1.7551	-1.82205	-1.89188	-1.96412	-2.03824	-2.11373	-2.19006	-2.26668	-2.34308	-2.41873	-2.49315	-2.56586	-2.6364	-2.70436	-2.76933	-2.83095	-2.8889	-2.94287	-2.9926
3	sub-24	1	80	4.98577	4.97518	4.95882	4.93667	4.90875	4.8751	4.83577	4.79083	4.74036	4.68447	4.62327	4.55691	4.48552	4.40928	4.32836	4.24294	4.15324	4.05946	3.96184	3.8606	3.756	3.64828	3.53774	3.42464	3.30927	3.19194	3.07296	2.95266	2.83136	2.7094	2.58712	2.46487	2.34299	2.22184	2.10177	1.9831	1.86618	1.75133	1.63887	1.52909	1.42229	1.31872	1.21865	1.12231	1.02992	0.941682
0	sub-25	0	20	-0.602666	-0.59611	-0.589584	-0.583106	-0.576693	-0.570364	-0.564136	-0.558025	-0.552048	-0.546219	-0.540552	-0.535057	-0.529747	-0.524628	-0.519709	-0.514993	-0.510482	-0.506179	-0.50208	-0.498182	-0.49448	-0.490964	-0.487624	-0.484449	-0.481424	-0.478534	-0.47576	-0.473083	-0.470483	-0.467937	-0.465422	-0.462913	-0.460384	-0.457808	-0.455156	-0.4524	-0.449511	-0.446461	-0.443219	-0.439758	-0.43605	-0.43207	-0.427791	-0.423193	-0.418255	-0.41296
1	sub-25	0	80	-0.923349	-0.965487	-1.00622	-1.04542	-1.08294	-1.11865	-1.15243	-1.18416	-1.21375	-1.24108	-1.26609	-1.28868	-1.30878	-1.32634	-1.34131	-1.35364	-1.36331	-1.37028	-1.37454	-1.3761	-1.37495	-1.37111	-1.3646	-1.35545	-1.3437	-1.3294	-1.31261	-1.29338	-1.2718	-1.24794	-1.22189	-1.19373	-1.16358	-1.13153	-1.0977	-1.0622	-1.02516	-0.986702	-0.946964	-0.906079	-0.864187	-0.82143	-0.777953	-0.733903	-0.689425	-0.644667
2	sub-25	1	20	-0.698445	-0.692439	-0.686333	-0.680139	-0.673867	-0.667527	-0.661128	-0.654681	-0.648196	-0.641683	-0.635152	-0.628613	-0.622077	-0.615554	-0.609052	-0.602584	-0.596158	-0.589785	-0.583476	-0.577241	-0.571091	-0.565035	-0.559086	-0.553253	-0.547549	-0.541983	-0.536567	-0.531313	-0.526233	-0.521336	-0.516636	-0.512142	-0.507865	-0.503814	-0.499997	-0.496423	-0.493096	-0.490022	-0.487203	-0.484641	-0.482337	-0.480289	-0.478494	-0.476949	-0.475648	-0.474585
3	sub-25	1	80	0.454115	0.453848	0.453647	0.45352	0.453475	0.45352	0.453663	0.453908	0.454261	0.454728	0.455313	0.456018	0.456849	0.457808	0.458898	0.460123	0.461483	0.462983	0.464625	0.466412	0.468347	0.470432	0.47267	0.475066	0.477622	0.480343	0.483231	0.486291	0.489526	0.49294	0.496535	0.500313	0.504278	0.50843	0.51277	0.517297	0.522009	0.526905	0.53198	0.537229	0.542646	0.548223	0.55395	0.559816	0.56581	0.571917
0	sub-26	0	20	-1.67595	-1.62968	-1.58068	-1.52944	-1.47646	-1.42224	-1.36727	-1.31203	-1.25698	-1.20254	-1.14912	-1.09709	-1.04675	-0.998409	-0.952293	-0.908597	-0.867469	-0.829011	-0.793279	-0.760284	-0.729994	-0.702336	-0.677199	-0.654434	-0.633859	-0.615264	-0.598414	-0.583053	-0.568913	-0.555713	-0.543169	-0.530996	-0.518913	-0.506646	-0.49393	-0.480518	-0.466178	-0.450698	-0.433891	-0.415592	-0.395668	-0.374011	-0.350546	-0.325228	-0.298045	-0.269019
1	sub-26	0	80	-2.8705	-2.92983	-2.98325	-3.03061	-3.0718	-3.10672	-3.13528	-3.15742	-3.17309	-3.18227	-3.18494	-3.1811	-3.17078	-3.15402	-3.13087	-3.10142	-3.06574	-3.02396	-2.97619	-2.92259	-2.8633	-2.79851	-2.72841	-2.6532	-2.57313	-2.48843	-2.39935	-2.30619	-2.20922	-2.10874	-2.00509	-1.89859	-1.78957	-1.6784	-1.56544	-1.45104	-1.3356	-1.21947	-1.10305	-0.986689	-0.870768	-0.755641	-0.641654	-0.529136	-0.418403	-0.30975
2	sub-26	1	20	-14.5506	-14.2654	-13.9605	-13.6367	-13.295	-12.9363	-12.5616	-12.172	-11.7687	-11.353	-10.926	-10.4892	-10.0439	-9.59155	-9.13359	-8.67152	-8.20686	-7.74115	-7.2759	-6.81264	-6.35285	-5.89798	-5.44943	-5.00852	-4.57651	-4.15455	-3.74372	-3.34499	-2.95925	-2.58726	-2.22972	-1.8872	-1.56018	-1.24904	-0.954079	-0.675493	-0.41339	-0.167799	0.0613336	0.274133	0.470793	0.651573	0.816789	0.96681	1.10206	1.22299
3	sub-26	1	80	0.21383	0.234362	0.254514	0.274266	0.293599	0.312497	0.330946	0.348931	0.36644	0.383462	0.399986	0.416001	0.431495	0.446457	0.460875	0.474739	0.488035	0.500752	0.512878	0.524399	0.535305	0.545583	0.555224	0.564217	0.572556	0.580236	0.587254	0.59361	0.599308	0.604357	0.608769	0.612561	0.615754	0.618375	0.620452	0.622022	0.623122	0.623795	0.624086	0.624043	0.623717	0.623158	0.62242	0.621553	0.620609	0.619637
0	sub-27	0	20	7.15214	7.14241	7.12893	7.11145	7.08971	7.06347	7.03249	6.99655	6.95544	6.90896	6.85693	6.79917	6.73554	6.66592	6.5902	6.5083	6.42018	6.32583	6.22524	6.11849	6.00563	5.8868	5.76213	5.6318	5.49604	5.35507	5.20916	5.0586	4.9037	4.74481	4.58226	4.41642	4.24767	4.07638	3.90294	3.72773	3.55112	3.3735	3.19522	3.01665	2.83814	2.66001	2.4826	2.30622	2.13117	1.95775
1	sub-27	0	80	4.32259	4.32292	4.32012	4.31396	4.30418	4.29053	4.27276	4.25063	4.22389	4.19231	4.15566	4.11371	4.06625	4.01308	3.95401	3.88886	3.81747	3.73969	3.6554	3.56448	3.46687	3.36248	3.2513	3.13329	3.00849	2.87694	2.73871	2.59391	2.44268	2.28521	2.12169	1.95237	1.77754	1.59751	1.41262	1.22327	1.02987	0.83288	0.632773	0.430062	0.225283	0.0189974	-0.188217	-0.395764	-0.603039	-0.809428
2	sub-27	1	20	-0.408627	-0.381409	-0.351804	-0.319903	-0.285811	-0.249645	-0.211529	-0.171599	-0.129998	-0.0868794	-0.042402	0.00326725	0.049956	0.097487	0.145679	0.194348	0.24331	0.292378	0.341369	0.390099	0.438388	0.486059	0.532941	0.578866	0.623672	0.667206	0.709321	0.749877	0.788746	0.825807	0.860948	0.89407	0.925081	0.9539	0.980457	1.00469	1.02655	1.04601	1.06302	1.07757	1.08966	1.09928	1.10645	1.11119	1.11353	1.11351
3	sub-27	1	80	0.184316	0.194637	0.203316	0.210336	0.215689	0.219374	0.221402	0.221789	0.220562	0.217756	0.213414	0.207586	0.20033	0.19171	0.181795	0.170659	0.158383	0.145046	0.130733	0.115529	0.0995185	0.0827858	0.0654144	0.0474863	0.0290817	0.0102792	-0.00884485	-0.0282157	-0.0477609	-0.0674098	-0.087094	-0.106747	-0.126305	-0.145706	-0.164889	-0.183798	-0.202376	-0.220571	-0.238332	-0.25561	-0.272362	-0.288542	-0.304111	-0.319029	-0.333262	-0.346773
0	sub-31	0	20	0.287813	0.289189	0.2905	0.2918	0.293139	0.294565	0.296122	0.297851	0.299789	0.301971	0.304426	0.307181	0.310259	0.31368	0.317459	0.32161	0.326143	0.331064	0.336378	0.342085	0.348186	0.354676	0.36155	0.368802	0.376421	0.384398	0.39272	0.401373	0.410343	0.419613	0.429165	0.438982	0.449044	0.459331	0.469822	0.480495	0.49133	0.502305	0.513399	0.52459	0.53586	0.547186	0.558552	0.569938	0.58133	0.592713
1	sub-31	0	80	-0.933718	-0.918172	-0.902473	-0.886687	-0.870876	-0.855103	-0.839428	-0.823908	-0.808601	-0.793558	-0.778829	-0.764461	-0.750495	-0.73697	-0.723918	-0.711371	-0.699352	-0.687882	-0.676977	-0.666647	-0.656898	-0.647733	-0.639149	-0.631139	-0.623693	-0.616796	-0.61043	-0.604575	-0.599206	-0.594297	-0.58982	-0.585743	-0.582034	-0.578659	-0.575582	-0.572768	-0.570178	-0.567775	-0.565523	-0.563383	-0.561319	-0.559293	-0.557271	-0.555219	-0.553102	-0.550891
2	sub-31	1	20	0.0983581	0.0796864	0.0607245	0.0414909	0.0220067	0.00229568	-0.0176161	-0.0377	-0.0579251	-0.0782583	-0.098664	-0.119105	-0.139542	-0.159934	-0.180242	-0.200421	-0.220431	-0.240229	-0.259773	-0.279021	-0.297933	-0.316469	-0.334591	-0.352261	-0.369444	-0.386104	-0.402209	-0.417725	-0.43262	-0.446861	-0.460417	-0.473254	-0.48534	-0.496642	-0.507126	-0.516757	-0.525499	-0.533315	-0.540169	-0.546023	-0.550838	-0.554578	-0.557205	-0.558683	-0.558979	-0.55806
3	sub-31	1	80	-0.838254	-0.816967	-0.794849	-0.771968	-0.748398	-0.724214	-0.699496	-0.674326	-0.648788	-0.622967	-0.596949	-0.570823	-0.544675	-0.51859	-0.492654	-0.466949	-0.441557	-0.416557	-0.392024	-0.368033	-0.344655	-0.321959	-0.300007	-0.278863	-0.258585	-0.239226	-0.220838	-0.203468	-0.187159	-0.171949	-0.157873	-0.144961	-0.133238	-0.122724	-0.113435	-0.105379	-0.098561	-0.0929782	-0.088623	-0.0854817	-0.0835347	-0.0827564	-0.0831152	-0.0845738	-0.0870889	-0.0906119
0	sub-32	0	20	-1.01665	-1.06986	-1.12617	-1.18554	-1.24791	-1.3132	-1.38134	-1.45223	-1.52576	-1.60181	-1.68026	-1.76097	-1.8438	-1.92859	-2.0152	-2.10346	-2.19321	-2.28427	-2.37648	-2.46966	-2.56361	-2.65816	-2.75311	-2.84826	-2.94341	-3.03834	-3.13285	-3.22669	-3.31966	-3.41151	-3.502	-3.59088	-3.6779	-3.76279	-3.84529	-3.92513	-4.00201	-4.07565	-4.14577	-4.21206	-4.27422	-4.33195	-4.38494	-4.43289	-4.47549	-4.51244
1	sub-32	0	80	1.87557	1.87521	1.874	1.87202	1.86935	1.86607	1.86229	1.8581	1.85358	1.84883	1.84394	1.83902	1.83414	1.82942	1.82494	1.82079	1.81706	1.81384	1.81121	1.80925	1.80803	1.80763	1.80811	1.80953	1.81195	1.81541	1.81996	1.82563	1.83244	1.84041	1.84956	1.85989	1.87138	1.88402	1.89779	1.91263	1.92851	1.94536	1.96309	1.98163	2.00085	2.02065	2.04088	2.06139	2.082	2.10254
2	sub-32	1	20	6.97214	7.24927	7.53245	7.8203	8.11144	8.40446	8.698	8.99068	9.28118	9.56819	9.85043	10.1267	10.3957	10.6563	10.9074	11.1479	11.3767	11.5926	11.7948	11.9822	12.1539	12.3089	12.4464	12.5656	12.6657	12.746	12.8059	12.8448	12.8622	12.8576	12.8306	12.7811	12.7087	12.6134	12.4952	12.3541	12.1902	12.0039	11.7953	11.5651	11.3136	11.0414	10.7493	10.4379	10.1081	9.76083
3	sub-32	1	80	-2.69745	-2.60675	-2.51475	-2.4216	-2.32748	-2.23253	-2.13695	-2.04088	-1.94452	-1.84802	-1.75157	-1.65534	-1.55949	-1.46422	-1.36967	-1.27604	-1.18347	-1.09214	-1.00221	-0.913839	-0.827172	-0.742362	-0.659553	-0.578887	-0.500497	-0.424514	-0.351061	-0.280258	-0.212215	-0.147038	-0.0848234	-0.0256607	0.0303687	0.083192	0.132745	0.178972	0.221827	0.261271	0.297273	0.32981	0.358868	0.384437	0.406514	0.425102	0.440209	0.451849
0	sub-33	0	20	-2.87864	-2.82549	-2.76864	-2.70845	-2.6453	-2.57957	-2.51162	-2.44184	-2.37061	-2.2983	-2.22526	-2.15186	-2.07842	-2.00527	-1.93272	-1.86104	-1.79049	-1.72131	-1.65369	-1.58784	-1.52389	-1.46197	-1.4022	-1.34464	-1.28934	-1.23634	-1.18565	-1.13725	-1.09112	-1.04721	-1.00545	-0.96579	-0.92813	-0.892379	-0.858433	-0.826182	-0.795507	-0.766285	-0.738386	-0.71168	-0.686033	-0.661311	-0.637383	-0.614117	-0.591387	-0.569071
1	sub-33	0	80	-1.34426	-1.44524	-1.54706	-1.64946	-1.75215	-1.85481	-1.95712	-2.05873	-2.15928	-2.25838	-2.35563	-2.4506	-2.54285	-2.63194	-2.7174	-2.79875	-2.8755	-2.94717	-3.01326	-3.07327	-3.1267	-3.17308	-3.21193	-3.2428	-3.26525	-3.27889	-3.28335	-3.2783	-3.26347	-3.23864	-3.20365	-3.15841	-3.10289	-3.03715	-2.9613	-2.87555	-2.78016	-2.67547	-2.56191	-2.43996	-2.31016	-2.17313	-2.02953	-1.88007	-1.72549	-1.56658
2	sub-33	1	20	-1.96588	-2.27401	-2.56773	-2.84579	-3.10702	-3.3503	-3.57461	-3.779	-3.96264	-4.12481	-4.26494	-4.38261	-4.47757	-4.54973	-4.59918	-4.62622	-4.63127	-4.61496	-4.57804	-4.52141	-4.44607	-4.35314	-4.2438	-4.1193	-3.98095	-3.83008	-3.668	-3.49601	-3.31539	-3.12733	-2.93298	-2.73341	-2.52961	-2.3225	-2.11292	-1.90168	-1.68949	-1.47701	-1.26485	-1.05356	-0.843614	-0.635453	-0.429461	-0.225982	-0.0253279	0.172223
3	sub-33	1	80	0.886661	0.883374	0.880297	0.877452	0.874858	0.872532	0.870492	0.868753	0.86733	0.866233	0.865471	0.865051	0.864975	0.86524	0.865844	0.866776	0.868027	0.869582	0.871425	0.873536	0.875893	0.878473	0.88125	0.884197	0.887284	0.890483	0.893763	0.897095	0.900449	0.903796	0.907108	0.910358	0.913521	0.91657	0.919484	0.922238	0.92481	0.927178	0.929319	0.931212	0.932833	0.934159	0.935163	0.935821	0.936104	0.935984
[truncated: 1,704 more columns]

## Sheet: panel A interp + bp
	subject	correct	frequency	0	1	2	3	4	5	6	7	8	9	10	11	12	13	14	15	16	17	18	19	20	21	22	23	24	25	26	27	28	29	30	31	32	33	34	35	36	37	38	39	40	41	42	43	44	45
0	sub-1	0	20	-0.13368	-0.134239	-0.135005	-0.135978	-0.137155	-0.138533	-0.140106	-0.141869	-0.143812	-0.145926	-0.148201	-0.150624	-0.153181	-0.155857	-0.158636	-0.1615	-0.164431	-0.16741	-0.170417	-0.173431	-0.176432	-0.179398	-0.182308	-0.185141	-0.187874	-0.190487	-0.192957	-0.195264	-0.197387	-0.199307	-0.201004	-0.202459	-0.203657	-0.20458	-0.205215	-0.205548	-0.205567	-0.205264	-0.20463	-0.203658	-0.202346	-0.20069	-0.198691	-0.196351	-0.193674	-0.190664
1	sub-1	0	80	0.0212008	0.0228887	0.0244517	0.0258829	0.0271757	0.028324	0.029322	0.0301648	0.0308479	0.0313677	0.0317218	0.0319087	0.0319281	0.031781	0.0314696	0.0309975	0.0303696	0.0295919	0.0286716	0.0276169	0.0264372	0.0251423	0.0237429	0.0222502	0.0206759	0.0190316	0.0173292	0.0155807	0.0137979	0.0119924	0.0101756	0.0083584	0.00655125	0.00476399	0.00300577	0.00128506	-0.000390448	-0.00201385	-0.00357903	-0.00508078	-0.00651473	-0.00787744	-0.00916636	-0.0103798	-0.011517	-0.0125779
2	sub-1	1	20	0.0832462	0.0774333	0.0712296	0.0647083	0.0579435	0.051009	0.0439781	0.036923	0.0299138	0.0230187	0.0163031	0.0098292	0.00365607	-0.0021611	-0.00757113	-0.0125272	-0.0169869	-0.0209129	-0.0242727	-0.027039	-0.02919	-0.030709	-0.0315851	-0.0318123	-0.0313901	-0.0303232	-0.0286209	-0.0262971	-0.0233703	-0.0198628	-0.015801	-0.0112145	-0.00613643	-0.000602564	0.00534862	0.0116764	0.018338	0.025289	0.0324837	0.0398753	0.0474164	0.0550592	0.0627558	0.0704587	0.0781208	0.0856961
3	sub-1	1	80	-0.0538203	-0.0535184	-0.0533727	-0.0533791	-0.0535327	-0.0538281	-0.0542588	-0.0548181	-0.0554984	-0.0562917	-0.0571894	-0.0581825	-0.0592615	-0.0604167	-0.0616379	-0.0629149	-0.0642372	-0.0655942	-0.0669751	-0.0683694	-0.0697664	-0.0711555	-0.0725266	-0.0738694	-0.0751743	-0.0764316	-0.0776322	-0.0787673	-0.0798284	-0.0808078	-0.0816978	-0.0824917	-0.0831828	-0.0837654	-0.0842341	-0.0845842	-0.0848115	-0.0849121	-0.0848831	-0.0847215	-0.0844252	-0.0839923	-0.0834214	-0.0827114	-0.0818616	-0.0808716
0	sub-4	0	20	0.505265	0.501766	0.498056	0.494125	0.489964	0.485563	0.480913	0.476006	0.470835	0.465392	0.459674	0.453674	0.447389	0.440818	0.43396	0.426815	0.419385	0.411674	0.403686	0.39543	0.386911	0.378142	0.369132	0.359894	0.350444	0.340796	0.330968	0.320979	0.310847	0.300595	0.290243	0.279816	0.269335	0.258826	0.248314	0.237823	0.22738	0.21701	0.206739	0.196594	0.186601	0.176785	0.167173	0.157789	0.148658	0.139802
1	sub-4	0	80	0.437282	0.437675	0.438125	0.438626	0.439173	0.439758	0.440375	0.441015	0.44167	0.44233	0.442984	0.443621	0.444231	0.444802	0.44532	0.445773	0.446148	0.446433	0.446613	0.446676	0.446608	0.446395	0.446025	0.445484	0.44476	0.443841	0.442715	0.441372	0.439801	0.437995	0.435947	0.433649	0.431099	0.428292	0.425228	0.421905	0.418325	0.41449	0.410406	0.406076	0.401507	0.396708	0.391687	0.386452	0.381016	0.375389
2	sub-4	1	20	0.631496	0.626144	0.621499	0.617567	0.614352	0.611857	0.610082	0.609025	0.608683	0.609053	0.610126	0.611895	0.614351	0.617482	0.621275	0.625715	0.630786	0.63647	0.642746	0.649593	0.656986	0.664901	0.673309	0.682181	0.691486	0.701189	0.711257	0.721652	0.732336	0.74327	0.754412	0.765721	0.777155	0.788671	0.800224	0.811771	0.823269	0.834672	0.845936	0.857018	0.867875	0.878461	0.888735	0.898653	0.908174	0.917255
3	sub-4	1	80	0.00188797	0.00352469	0.00521992	0.00697277	0.00878176	0.0106447	0.012559	0.0145211	0.0165272	0.0185728	0.020653	0.0227624	0.0248952	0.0270455	0.029207	0.0313732	0.0335377	0.035694	0.0378357	0.0399567	0.0420509	0.0441128	0.0461371	0.0481188	0.0500535	0.0519372	0.0537664	0.0555382	0.0572501	0.0589003	0.0604876	0.0620111	0.0634709	0.0648672	0.0662008	0.0674731	0.0686856	0.0698403	0.0709392	0.0719847	0.0729792	0.073925	0.0748247	0.0756805	0.0764948	0.0772697
0	sub-5	0	20	-0.0982532	-0.0990992	-0.0999507	-0.100789	-0.101597	-0.102358	-0.103057	-0.103677	-0.104207	-0.104633	-0.104944	-0.10513	-0.105184	-0.105096	-0.104863	-0.10448	-0.103944	-0.103255	-0.102413	-0.10142	-0.100279	-0.0989967	-0.097578	-0.0960306	-0.0943629	-0.0925843	-0.0907051	-0.088736	-0.0866884	-0.084574	-0.0824045	-0.0801917	-0.0779471	-0.0756818	-0.0734068	-0.0711322	-0.0688675	-0.0666218	-0.0644032	-0.0622194	-0.0600774	-0.0579835	-0.0559433	-0.053962	-0.0520441	-0.0501933
1	sub-5	0	80	0.00011549	-0.00247057	-0.00525423	-0.00821676	-0.0113385	-0.0145989	-0.0179769	-0.0214508	-0.0249986	-0.0285982	-0.0322274	-0.0358639	-0.0394861	-0.0430722	-0.0466013	-0.0500531	-0.0534079	-0.0566472	-0.0597535	-0.0627107	-0.065504	-0.0681201	-0.0705475	-0.0727759	-0.0747972	-0.0766049	-0.0781941	-0.0795622	-0.0807082	-0.0816329	-0.0823392	-0.0828314	-0.0831157	-0.0831998	-0.0830931	-0.082806	-0.0823504	-0.0817391	-0.0809861	-0.0801056	-0.0791128	-0.078023	-0.0768513	-0.0756133	-0.0743239	-0.0729978
2	sub-5	1	20	-1.44972	-1.44006	-1.43003	-1.41962	-1.40883	-1.39768	-1.38614	-1.37423	-1.36196	-1.34932	-1.33632	-1.32296	-1.30926	-1.29523	-1.28086	-1.26618	-1.2512	-1.23592	-1.22036	-1.20453	-1.18846	-1.17216	-1.15565	-1.13896	-1.12209	-1.10508	-1.08794	-1.07072	-1.05342	-1.03607	-1.01871	-1.00136	-0.984045	-0.966793	-0.94963	-0.932582	-0.915673	-0.898928	-0.88237	-0.866021	-0.849904	-0.834038	-0.818444	-0.803141	-0.788145	-0.773473
3	sub-5	1	80	-0.369743	-0.36909	-0.368383	-0.367626	-0.366819	-0.365965	-0.365068	-0.364129	-0.363152	-0.362137	-0.361088	-0.360007	-0.358894	-0.357752	-0.35658	-0.355381	-0.354154	-0.352899	-0.351616	-0.350304	-0.348962	-0.347589	-0.346181	-0.344739	-0.343258	-0.341736	-0.34017	-0.338557	-0.336893	-0.335174	-0.333397	-0.331557	-0.32965	-0.327672	-0.325619	-0.323487	-0.321272	-0.31897	-0.316579	-0.314094	-0.311514	-0.308837	-0.306061	-0.303186	-0.300211	-0.297139
0	sub-7	0	20	0.515493	0.513953	0.512218	0.510285	0.508147	0.505798	0.503233	0.500447	0.497436	0.494193	0.490716	0.487001	0.483045	0.478845	0.4744	0.469709	0.464773	0.459593	0.454171	0.448511	0.442616	0.436494	0.430149	0.423591	0.416828	0.409871	0.40273	0.395419	0.387951	0.38034	0.372603	0.364754	0.356813	0.348795	0.34072	0.332606	0.324472	0.316339	0.308224	0.300148	0.292129	0.284187	0.27634	0.268605	0.260999	0.253539
1	sub-7	0	80	-0.12475	-0.129617	-0.134384	-0.13904	-0.143573	-0.147975	-0.152233	-0.156339	-0.160285	-0.16406	-0.167658	-0.171073	-0.174297	-0.177327	-0.180156	-0.182782	-0.185202	-0.187413	-0.189413	-0.1912	-0.192775	-0.194137	-0.195286	-0.196222	-0.196947	-0.197462	-0.197769	-0.197871	-0.19777	-0.197471	-0.196976	-0.196291	-0.195419	-0.194367	-0.193139	-0.191742	-0.190182	-0.188465	-0.186599	-0.18459	-0.182446	-0.180175	-0.177785	-0.175285	-0.172682	-0.169986
2	sub-7	1	20	0.0164363	0.0211648	0.0263461	0.0319729	0.0380338	0.0445138	0.0513941	0.0586523	0.0662625	0.0741958	0.08242	0.0909003	0.0995989	0.108476	0.117488	0.126592	0.13574	0.144886	0.153982	0.162977	0.171822	0.180467	0.188863	0.196962	0.204716	0.212079	0.219008	0.225459	0.231395	0.236779	0.241579	0.245766	0.249313	0.252199	0.254406	0.255919	0.256728	0.256825	0.256208	0.254876	0.252833	0.250088	0.24665	0.242534	0.237757	0.232337
3	sub-7	1	80	-0.129629	-0.128134	-0.126661	-0.125213	-0.123794	-0.122406	-0.121055	-0.119742	-0.118471	-0.117245	-0.116067	-0.114939	-0.113863	-0.11284	-0.111872	-0.110959	-0.110101	-0.109298	-0.10855	-0.107856	-0.107214	-0.106623	-0.106081	-0.105585	-0.105135	-0.104728	-0.104361	-0.104033	-0.103741	-0.103483	-0.103257	-0.103063	-0.102897	-0.10276	-0.10265	-0.102566	-0.102507	-0.102475	-0.102469	-0.102488	-0.102535	-0.10261	-0.102713	-0.102847	-0.103013	-0.103212
0	sub-9	0	20	0.0211131	0.0164953	0.0118767	0.00726391	0.00266326	-0.00191927	-0.00647806	-0.0110078	-0.0155038	-0.0199615	-0.0243771	-0.0287473	-0.0330693	-0.037341	-0.0415608	-0.0457276	-0.0498409	-0.0539005	-0.0579067	-0.0618601	-0.0657614	-0.0696115	-0.0734113	-0.0771616	-0.0808635	-0.0845174	-0.0881241	-0.0916839	-0.0951969	-0.0986631	-0.102082	-0.105454	-0.108776	-0.112049	-0.115271	-0.118439	-0.121551	-0.124603	-0.127593	-0.130516	-0.133367	-0.13614	-0.138831	-0.141432	-0.143937	-0.146339
1	sub-9	0	80	0.190781	0.194316	0.198039	0.201925	0.205948	0.21008	0.214295	0.218563	0.222855	0.227143	0.231397	0.235588	0.239687	0.243667	0.2475	0.25116	0.254622	0.257864	0.260862	0.263596	0.266048	0.268202	0.270041	0.271552	0.272725	0.27355	0.274019	0.274127	0.27387	0.273248	0.272259	0.270906	0.269194	0.267127	0.264714	0.261963	0.258884	0.255489	0.251789	0.247799	0.243533	0.239004	0.23423	0.229226	0.224008	0.218593
2	sub-9	1	20	-0.14981	-0.151805	-0.153891	-0.156064	-0.158322	-0.160663	-0.163085	-0.165584	-0.168159	-0.170804	-0.173517	-0.176292	-0.179125	-0.182008	-0.184937	-0.187904	-0.190901	-0.19392	-0.196952	-0.199989	-0.203022	-0.206041	-0.209037	-0.212	-0.214921	-0.21779	-0.220597	-0.223332	-0.225986	-0.22855	-0.231012	-0.233366	-0.235601	-0.23771	-0.239683	-0.241514	-0.243194	-0.244718	-0.246077	-0.247265	-0.248276	-0.249103	-0.249741	-0.250182	-0.25042	-0.25045
3	sub-9	1	80	0.119823	0.117018	0.1143	0.111673	0.109138	0.106698	0.104355	0.102112	0.0999705	0.097931	0.0959952	0.0941639	0.0924378	0.0908173	0.0893026	0.0878935	0.0865895	0.08539	0.0842938	0.0832996	0.0824057	0.08161	0.0809102	0.0803035	0.0797869	0.0793569	0.0790097	0.0787414	0.0785474	0.0784231	0.0783632	0.0783625	0.0784152	0.0785153	0.0786566	0.0788326	0.0790364	0.0792612	0.0794998	0.0797451	0.0799898	0.0802268	0.0804489	0.0806493	0.0808212	0.080958
0	sub-10	0	20	-0.242992	-0.238765	-0.234358	-0.229773	-0.225009	-0.220072	-0.214963	-0.209689	-0.204255	-0.19867	-0.19294	-0.187077	-0.18109	-0.174992	-0.168795	-0.162513	-0.156161	-0.149753	-0.143305	-0.136832	-0.130351	-0.123875	-0.117422	-0.111007	-0.104642	-0.0983432	-0.0921227	-0.0859929	-0.079965	-0.0740493	-0.068255	-0.0625903	-0.0570622	-0.0516767	-0.0464388	-0.0413525	-0.0364208	-0.031646	-0.0270292	-0.0225712	-0.0182717	-0.01413	-0.0101447	-0.00631408	-0.00263573	0.000892954
1	sub-10	0	80	-1.62454	-1.61067	-1.59676	-1.58282	-1.56887	-1.55492	-1.54097	-1.52705	-1.51317	-1.49934	-1.48556	-1.47185	-1.45822	-1.44466	-1.43119	-1.41781	-1.40452	-1.3913	-1.37817	-1.36511	-1.35211	-1.33916	-1.32626	-1.31338	-1.30051	-1.28764	-1.27474	-1.26181	-1.24882	-1.23575	-1.22259	-1.20932	-1.19592	-1.18239	-1.16869	-1.15483	-1.14079	-1.12655	-1.1121	-1.09745	-1.08257	-1.06747	-1.05213	-1.03655	-1.02072	-1.00465
2	sub-10	1	20	-2.10755	-2.10303	-2.09884	-2.09494	-2.09128	-2.08784	-2.08457	-2.08143	-2.07839	-2.07541	-2.07246	-2.0695	-2.0665	-2.06346	-2.06033	-2.05712	-2.05381	-2.05039	-2.04687	-2.04324	-2.03953	-2.03573	-2.03187	-2.02797	-2.02405	-2.02014	-2.01625	-2.01242	-2.00868	-2.00505	-2.00156	-1.99823	-1.99508	-1.99213	-1.9894	-1.98689	-1.98461	-1.98255	-1.98071	-1.97907	-1.9776	-1.97629	-1.97508	-1.97394	-1.97282	-1.97165
3	sub-10	1	80	-0.23396	-0.229952	-0.226028	-0.222186	-0.218426	-0.214744	-0.211139	-0.207606	-0.204144	-0.200746	-0.19741	-0.194131	-0.190903	-0.18772	-0.184578	-0.18147	-0.178391	-0.175333	-0.172292	-0.169261	-0.166234	-0.163205	-0.16017	-0.157122	-0.154057	-0.150971	-0.147859	-0.144718	-0.141546	-0.13834	-0.135098	-0.131819	-0.128502	-0.125148	-0.121757	-0.11833	-0.114868	-0.111373	-0.107848	-0.104294	-0.100716	-0.0971141	-0.093493	-0.0898551	-0.0862036	-0.0825412
0	sub-11	0	20	0.0172366	0.02154	0.0259402	0.0304307	0.0350044	0.0396537	0.0443706	0.0491465	0.0539723	0.0588385	0.0637352	0.0686519	0.0735783	0.0785036	0.0834169	0.0883075	0.0931644	0.097977	0.102735	0.107427	0.112044	0.116575	0.121012	0.125343	0.12956	0.133655	0.137618	0.141442	0.145118	0.148639	0.151998	0.15519	0.158208	0.161048	0.163706	0.166178	0.168461	0.170554	0.172456	0.174166	0.175685	0.177014	0.178156	0.179111	0.179885	0.180481
1	sub-11	0	80	0.11533	0.119311	0.122858	0.125993	0.128737	0.131118	0.133158	0.134886	0.136328	0.137509	0.138456	0.139194	0.139748	0.140141	0.140394	0.140528	0.14056	0.140506	0.140381	0.140196	0.139961	0.139682	0.139365	0.139012	0.138625	0.138203	0.137742	0.13724	0.136691	0.136089	0.135426	0.134695	0.13389	0.133003	0.132027	0.130956	0.129785	0.128511	0.127131	0.125641	0.124042	0.122335	0.12052	0.118602	0.116585	0.114474
2	sub-11	1	20	-0.536101	-0.533312	-0.529618	-0.525081	-0.519762	-0.513722	-0.507025	-0.49973	-0.491898	-0.483588	-0.474854	-0.465751	-0.45633	-0.446639	-0.436726	-0.426632	-0.416399	-0.406066	-0.395669	-0.385243	-0.37482	-0.364431	-0.354107	-0.343876	-0.333766	-0.323804	-0.314016	-0.304427	-0.295063	-0.285946	-0.2771	-0.268547	-0.260307	-0.252402	-0.24485	-0.237669	-0.230876	-0.224487	-0.218517	-0.212977	-0.207882	-0.203241	-0.199063	-0.195356	-0.192126	-0.189375
3	sub-11	1	80	0.0861053	0.0865815	0.0870884	0.0876302	0.0882107	0.0888334	0.0895014	0.0902173	0.0909833	0.0918013	0.0926727	0.0935985	0.0945793	0.0956151	0.0967059	0.0978507	0.0990484	0.100297	0.101595	0.10294	0.104328	0.105755	0.107218	0.108711	0.110231	0.111771	0.113325	0.114888	0.116453	0.118013	0.119561	0.12109	0.122591	0.124057	0.125479	0.126851	0.128162	0.129406	0.130574	0.131658	0.132652	0.133547	0.134338	0.135018	0.135582	0.136024
0	sub-12	0	20	-0.258444	-0.254236	-0.250117	-0.246072	-0.242087	-0.238148	-0.234244	-0.230362	-0.226492	-0.222624	-0.21875	-0.214862	-0.210955	-0.207023	-0.203064	-0.199075	-0.195055	-0.191003	-0.18692	-0.182808	-0.17867	-0.17451	-0.170332	-0.166142	-0.161946	-0.15775	-0.153563	-0.149391	-0.145243	-0.141128	-0.137053	-0.133028	-0.12906	-0.125159	-0.121333	-0.117589	-0.113936	-0.11038	-0.106929	-0.10359	-0.100368	-0.0972688	-0.0942983	-0.0914607	-0.0887603	-0.0862006
1	sub-12	0	80	0.0414602	0.0416452	0.0417867	0.041871	0.0418849	0.041816	0.0416521	0.0413821	0.0409961	0.0404852	0.0398417	0.0390596	0.0381341	0.0370619	0.0358413	0.0344719	0.0329548	0.0312927	0.0294893	0.0275498	0.0254806	0.0232889	0.020983	0.0185718	0.0160648	0.0134719	0.0108035	0.00806974	0.00528107	0.00244757	-0.000420965	-0.00331518	-0.00622629	-0.00914617	-0.0120675	-0.0149837	-0.0178892	-0.0207793	-0.0236502	-0.0264991	-0.0293241	-0.032124	-0.0348986	-0.0376484	-0.0403744	-0.0430784
2	sub-12	1	20	-0.264944	-0.258124	-0.251411	-0.244826	-0.238387	-0.232114	-0.226027	-0.220144	-0.214482	-0.209061	-0.203896	-0.199003	-0.194398	-0.190094	-0.186104	-0.18244	-0.179111	-0.176128	-0.173497	-0.171225	-0.169318	-0.16778	-0.166614	-0.165822	-0.165404	-0.165359	-0.165687	-0.166385	-0.167449	-0.168874	-0.170656	-0.172788	-0.175263	-0.178074	-0.181212	-0.184668	-0.188432	-0.192494	-0.196843	-0.201467	-0.206354	-0.21149	-0.216862	-0.222455	-0.228253	-0.23424
3	sub-12	1	80	-0.354366	-0.35203	-0.349602	-0.347078	-0.344452	-0.34172	-0.338878	-0.335922	-0.332847	-0.329652	-0.326332	-0.322886	-0.319311	-0.315605	-0.311768	-0.307798	-0.303696	-0.299462	-0.295097	-0.290603	-0.285981	-0.281234	-0.276365	-0.271377	-0.266274	-0.26106	-0.25574	-0.250317	-0.244797	-0.239186	-0.233487	-0.227707	-0.221852	-0.215926	-0.209936	-0.203888	-0.197787	-0.19164	-0.185453	-0.179231	-0.17298	-0.166707	-0.160416	-0.154115	-0.147807	-0.141498
0	sub-13	0	20	0.416722	0.412476	0.408047	0.403434	0.398637	0.393657	0.388495	0.383157	0.377647	0.371971	0.366136	0.36015	0.354022	0.347761	0.341377	0.33488	0.328281	0.321589	0.314815	0.307969	0.301061	0.294102	0.287099	0.280061	0.272998	0.265917	0.258824	0.251728	0.244635	0.23755	0.23048	0.223432	0.21641	0.20942	0.202469	0.195561	0.188704	0.181901	0.175161	0.168488	0.161889	0.15537	0.148937	0.142597	0.136355	0.130219
1	sub-13	0	80	0.0531561	0.0505787	0.0480191	0.0454828	0.0429748	0.0404992	0.0380596	0.0356585	0.0332975	0.0309772	0.0286973	0.0264564	0.0242524	0.0220822	0.0199418	0.0178268	0.0157324	0.0136532	0.0115842	0.00952011	0.00745608	0.00538771	0.00331119	0.00122341	-0.000877878	-0.00299407	-0.00512565	-0.00727219	-0.00943235	-0.0116039	-0.0137837	-0.0159678	-0.0181512	-0.020328	-0.0224917	-0.0246347	-0.0267486	-0.0288244	-0.0308524	-0.0328222	-0.0347228	-0.0365433	-0.038272	-0.0398976	-0.0414087	-0.0427943
2	sub-13	1	20	0.343475	0.338502	0.332436	0.325331	0.31725	0.308262	0.29844	0.287863	0.276616	0.264786	0.252464	0.239745	0.226724	0.213499	0.200167	0.186821	0.173557	0.160464	0.147628	0.135131	0.123049	0.111451	0.1004	0.0899505	0.0801494	0.0710342	0.0626337	0.0549673	0.0480452	0.0418682	0.0364279	0.0317065	0.0276776	0.0243061	0.0215485	0.0193538	0.017663	0.0164105	0.0155245	0.0149274	0.0145373	0.0142684	0.014032	0.0137378	0.013295	0.0126128
3	sub-13	1	80	0.239531	0.237648	0.235819	0.234049	0.23234	0.230694	0.229113	0.227597	0.226147	0.224763	0.223443	0.222188	0.220995	0.219863	0.218789	0.21777	0.216805	0.215888	0.215018	0.214189	0.213399	0.212643	0.211917	0.211216	0.210535	0.209872	0.20922	0.208577	0.207937	0.207298	0.206655	0.206005	0.205346	0.204674	0.203987	0.203283	0.202559	0.201814	0.201047	0.200254	0.199436	0.198591	0.197716	0.196812	0.195875	0.194906
0	sub-14	0	20	-0.212352	-0.20923	-0.206274	-0.203484	-0.200862	-0.198408	-0.196119	-0.193995	-0.192032	-0.190227	-0.188575	-0.187072	-0.185711	-0.184488	-0.183395	-0.182426	-0.181574	-0.180831	-0.18019	-0.179644	-0.179182	-0.178798	-0.178481	-0.178223	-0.178015	-0.177846	-0.177708	-0.177591	-0.177484	-0.177379	-0.177265	-0.177134	-0.176976	-0.176782	-0.176544	-0.176254	-0.175905	-0.175488	-0.174998	-0.174428	-0.173773	-0.173027	-0.172186	-0.171248	-0.170208	-0.169066
1	sub-14	0	80	0.884221	0.88031	0.876445	0.872607	0.868782	0.864953	0.861101	0.85721	0.853263	0.849243	0.845133	0.840918	0.836582	0.832111	0.827491	0.822708	0.817749	0.812604	0.80726	0.801707	0.795935	0.789936	0.783701	0.777224	0.770497	0.763515	0.756274	0.748769	0.740999	0.732961	0.724655	0.716082	0.707244	0.698143	0.688785	0.679176	0.669321	0.659229	0.64891	0.638373	0.627629	0.616689	0.605564	0.594266	0.582806	0.571196
2	sub-14	1	20	0.119693	0.118736	0.117779	0.116822	0.115866	0.114909	0.113952	0.112995	0.112039	0.111082	0.110125	0.109169	0.108212	0.107255	0.106299	0.105342	0.104386	0.103429	0.102473	0.101516	0.10056	0.0996034	0.0986471	0.0976908	0.0967345	0.0957783	0.0948222	0.0938661	0.0929101	0.0919541	0.0909983	0.0900425	0.0890867	0.0881311	0.0871756	0.0862201	0.0852647	0.0843095	0.0833543	0.0823993	0.0814443	0.0804895	0.0795348	0.0785802	0.0776257	0.0766714
3	sub-14	1	80	0.107801	0.104712	0.101424	0.0979431	0.0942778	0.0904372	0.0864312	0.0822707	0.077967	0.0735323	0.0689792	0.064321	0.0595711	0.0547434	0.0498523	0.044912	0.0399373	0.0349428	0.0299434	0.0249539	0.0199892	0.0150639	0.0101926	0.00538974	0.000669501	-0.00395427	-0.00846805	-0.0128588	-0.0171139	-0.0212214	-0.0251699	-0.0289489	-0.0325486	-0.0359601	-0.0391755	-0.0421879	-0.0449914	-0.0475813	-0.0499541	-0.0521074	-0.0540399	-0.0557517	-0.057244	-0.0585192	-0.0595805	-0.0604326
0	sub-15	0	20	0.018751	0.00611839	-0.00547425	-0.0160407	-0.0255998	-0.0341745	-0.0417918	-0.0484821	-0.0542787	-0.0592174	-0.0633366	-0.0666767	-0.0692801	-0.071191	-0.0724551	-0.0731197	-0.0732335	-0.0728462	-0.0720088	-0.0707733	-0.0691923	-0.0673198	-0.0652105	-0.0629203	-0.0605058	-0.0580242	-0.055533	-0.0530897	-0.0507519	-0.0485769	-0.0466216	-0.0449428	-0.0435968	-0.0426392	-0.0421245	-0.0421059	-0.0426344	-0.0437581	-0.0455215	-0.0479647	-0.0511219	-0.055021	-0.0596827	-0.06512	-0.0713376	-0.0783326
1	sub-15	0	80	0.289051	0.284074	0.279035	0.274009	0.269072	0.264301	0.259775	0.255571	0.251764	0.248428	0.245635	0.243454	0.24195	0.241183	0.241211	0.242084	0.243847	0.246539	0.250191	0.254829	0.260469	0.267122	0.274793	0.28348	0.293174	0.303864	0.315531	0.328154	0.34171	0.356171	0.371509	0.387693	0.404692	0.422473	0.441003	0.460249	0.480177	0.500751	0.521938	0.543701	0.566004	0.588809	0.612075	0.635758	0.659813	0.684187
2	sub-15	1	20	-1.85165	-1.87667	-1.90052	-1.92314	-1.94445	-1.96439	-1.9829	-1.99991	-2.01537	-2.02924	-2.04147	-2.05203	-2.06087	-2.06799	-2.07336	-2.07698	-2.07885	-2.07897	-2.07736	-2.07406	-2.06908	-2.06248	-2.0543	-2.0446	-2.03344	-2.0209	-2.00704	-1.99196	-1.97575	-1.95849	-1.94029	-1.92126	-1.9015	-1.88112	-1.86024	-1.83897	-1.81744	-1.79575	-1.77403	-1.7524	-1.73096	-1.70983	-1.68912	-1.66893	-1.64936	-1.63051
3	sub-15	1	80	-0.2651	-0.257844	-0.250914	-0.244315	-0.238051	-0.232126	-0.226545	-0.221313	-0.216436	-0.211918	-0.207765	-0.203981	-0.200571	-0.19754	-0.194891	-0.192625	-0.190744	-0.189246	-0.188126	-0.187378	-0.186994	-0.186962	-0.187269	-0.187898	-0.188833	-0.190054	-0.191544	-0.19328	-0.195243	-0.197411	-0.199763	-0.202278	-0.204935	-0.207715	-0.210598	-0.213566	-0.216602	-0.219691	-0.222819	-0.225975	-0.229148	-0.232331	-0.235516	-0.2387	-0.241882	-0.245061
0	sub-16	0	20	-0.825362	-0.82194	-0.818474	-0.814953	-0.811365	-0.8077	-0.803947	-0.800097	-0.79614	-0.792068	-0.787874	-0.78355	-0.779091	-0.774492	-0.769749	-0.764858	-0.759818	-0.754627	-0.749285	-0.743793	-0.738153	-0.732367	-0.726438	-0.720371	-0.71417	-0.707841	-0.70139	-0.694824	-0.688148	-0.681371	-0.674498	-0.667538	-0.660498	-0.653385	-0.646206	-0.638968	-0.631677	-0.62434	-0.616963	-0.609552	-0.602111	-0.594647	-0.587164	-0.579665	-0.572155	-0.564638
1	sub-16	0	80	-0.217082	-0.220598	-0.22395	-0.227124	-0.230108	-0.232891	-0.235466	-0.237824	-0.239959	-0.241866	-0.243542	-0.244983	-0.246189	-0.24716	-0.247897	-0.248402	-0.248678	-0.24873	-0.248563	-0.248182	-0.247595	-0.246809	-0.245832	-0.244673	-0.24334	-0.241845	-0.240196	-0.238404	-0.236481	-0.234437	-0.232284	-0.230033	-0.227695	-0.225282	-0.222805	-0.220276	-0.217704	-0.2151	-0.212476	-0.209839	-0.207198	-0.204562	-0.201938	-0.199331	-0.196746	-0.194187
2	sub-16	1	20	-1.29825	-1.28978	-1.28098	-1.27186	-1.2624	-1.25259	-1.2424	-1.23183	-1.22086	-1.20947	-1.19765	-1.18538	-1.17266	-1.15947	-1.1458	-1.13165	-1.11701	-1.10187	-1.08625	-1.07014	-1.05354	-1.03648	-1.01895	-1.00099	-0.982611	-0.963835	-0.944692	-0.925214	-0.905435	-0.885394	-0.865132	-0.844691	-0.824118	-0.803459	-0.782762	-0.762077	-0.741453	-0.720938	-0.700582	-0.680431	-0.66053	-0.640922	-0.621649	-0.602748	-0.584253	-0.566197
3	sub-16	1	80	-0.701973	-0.69505	-0.68809	-0.681101	-0.674092	-0.667072	-0.660049	-0.653031	-0.646025	-0.63904	-0.632082	-0.625158	-0.618274	-0.611437	-0.604652	-0.597924	-0.591257	-0.584656	-0.578124	-0.571664	-0.565278	-0.558969	-0.552738	-0.546586	-0.540514	-0.534521	-0.528607	-0.522772	-0.517013	-0.51133	-0.505721	-0.500183	-0.494714	-0.489311	-0.483972	-0.478692	-0.473468	-0.468297	-0.463174	-0.458095	-0.453056	-0.448052	-0.443079	-0.438131	-0.433205	-0.428295
0	sub-18	0	20	-0.564903	-0.557695	-0.550359	-0.54291	-0.535363	-0.527734	-0.520042	-0.512306	-0.504544	-0.496776	-0.489024	-0.481306	-0.473642	-0.466053	-0.458557	-0.451173	-0.443919	-0.436809	-0.42986	-0.423085	-0.416495	-0.410102	-0.403912	-0.397933	-0.39217	-0.386625	-0.381301	-0.376195	-0.371307	-0.366631	-0.362162	-0.357893	-0.353815	-0.349918	-0.346192	-0.342625	-0.339205	-0.335918	-0.332753	-0.329694	-0.32673	-0.323846	-0.321029	-0.318267	-0.315545	-0.312851
1	sub-18	0	80	0.298551	0.297264	0.295556	0.293464	0.291028	0.288291	0.285303	0.282112	0.278773	0.275342	0.271875	0.26843	0.265066	0.261842	0.258815	0.256042	0.253576	0.251471	0.249774	0.248531	0.247783	0.247567	0.247916	0.248856	0.250411	0.252599	0.255432	0.258917	0.263055	0.267845	0.273277	0.279338	0.286009	0.293268	0.301085	0.309428	0.318261	0.327543	0.33723	0.347274	0.357628	0.368238	0.379054	0.390019	0.401081	0.412182
2	sub-18	1	20	0.0303339	0.0371209	0.0445378	0.0525523	0.0611259	0.0702142	0.079767	0.089729	0.10004	0.110635	0.121446	0.1324	0.143423	0.154436	0.165359	0.176112	0.18661	0.196771	0.206512	0.215749	0.224402	0.232392	0.239642	0.246079	0.251636	0.256249	0.259861	0.262422	0.263886	0.264219	0.263393	0.261387	0.25819	0.2538	0.248221	0.241468	0.233561	0.224531	0.214415	0.203257	0.191109	0.178027	0.164074	0.149314	0.133815	0.117648
3	sub-18	1	80	-0.0757894	-0.0744049	-0.0731312	-0.0719686	-0.0709169	-0.0699752	-0.0691427	-0.0684178	-0.0677989	-0.0672837	-0.0668699	-0.0665548	-0.0663353	-0.0662082	-0.0661698	-0.0662163	-0.0663436	-0.0665472	-0.0668224	-0.0671644	-0.0675682	-0.0680284	-0.06854	-0.0690976	-0.0696959	-0.0703296	-0.0709935	-0.0716822	-0.0723906	-0.0731133	-0.0738451	-0.0745807	-0.075315	-0.076043	-0.07676	-0.0774613	-0.0781427	-0.0788002	-0.0794297	-0.0800278	-0.0805909	-0.0811155	-0.0815982	-0.0820358	-0.082425	-0.0827626
0	sub-19	0	20	-0.00087691	0.000713686	0.00258548	0.00473507	0.00715751	0.00984623	0.0127931	0.0159884	0.019421	0.0230784	0.0269465	0.0310103	0.0352535	0.0396589	0.0442085	0.0488834	0.0536644	0.0585315	0.0634644	0.0684424	0.0734447	0.0784501	0.0834375	0.0883859	0.0932743	0.0980823	0.10279	0.107377	0.111826	0.116119	0.120239	0.12417	0.127898	0.13141	0.134694	0.13774	0.14054	0.143086	0.145374	0.1474	0.149162	0.150659	0.151893	0.152867	0.153584	0.154051
1	sub-19	0	80	-0.166892	-0.167046	-0.167158	-0.167234	-0.167274	-0.167283	-0.167261	-0.16721	-0.167132	-0.167027	-0.166895	-0.166737	-0.166551	-0.166339	-0.166099	-0.165832	-0.165536	-0.165211	-0.164857	-0.164474	-0.164063	-0.163622	-0.163153	-0.162657	-0.162135	-0.161587	-0.161016	-0.160424	-0.159812	-0.159183	-0.158539	-0.157884	-0.157221	-0.156553	-0.155884	-0.155219	-0.15456	-0.153914	-0.153284	-0.152675	-0.152093	-0.151541	-0.151026	-0.150552	-0.150123	-0.149744
2	sub-19	1	20	0.163731	0.164605	0.165184	0.165464	0.165447	0.16513	0.164517	0.163609	0.162409	0.160923	0.159156	0.157114	0.154805	0.152236	0.149419	0.146363	0.143079	0.139581	0.135881	0.131994	0.127934	0.123717	0.119359	0.114876	0.110285	0.105603	0.100846	0.0960308	0.0911747	0.0862934	0.0814031	0.0765192	0.0716568	0.0668306	0.0620547	0.0573427	0.052708	0.0481633	0.0437211	0.0393933	0.0351915	0.0311271	0.0272109	0.0234533	0.0198643	0.0164537
3	sub-19	1	80	-0.251381	-0.250376	-0.24941	-0.24848	-0.247581	-0.246711	-0.245866	-0.245041	-0.244233	-0.243437	-0.24265	-0.241865	-0.241079	-0.240287	-0.239483	-0.238663	-0.23782	-0.236949	-0.236045	-0.235102	-0.234113	-0.233072	-0.231972	-0.230808	-0.229573	-0.228261	-0.226863	-0.225375	-0.22379	-0.222101	-0.220302	-0.218388	-0.216354	-0.214194	-0.211904	-0.20948	-0.206921	-0.204222	-0.201382	-0.198401	-0.195279	-0.192016	-0.188614	-0.185076	-0.181405	-0.177606
0	sub-20	0	20	-0.121233	-0.120226	-0.119168	-0.118066	-0.116923	-0.115745	-0.114538	-0.113307	-0.112059	-0.110799	-0.109535	-0.108274	-0.107024	-0.105792	-0.104587	-0.103418	-0.102295	-0.101226	-0.100221	-0.0992921	-0.0984483	-0.0977005	-0.0970595	-0.0965357	-0.0961396	-0.0958811	-0.0957699	-0.0958148	-0.0960241	-0.0964051	-0.0969641	-0.0977065	-0.0986362	-0.0997557	-0.101066	-0.102568	-0.104257	-0.106132	-0.108187	-0.110415	-0.112807	-0.115354	-0.118044	-0.120864	-0.123801	-0.126839
1	sub-20	0	80	-0.285738	-0.282917	-0.27994	-0.27681	-0.27353	-0.270103	-0.266533	-0.262823	-0.258976	-0.254994	-0.25088	-0.246635	-0.242262	-0.237762	-0.233138	-0.228391	-0.223524	-0.21854	-0.213442	-0.208235	-0.202925	-0.197517	-0.192019	-0.18644	-0.180791	-0.175081	-0.169323	-0.163529	-0.157714	-0.151891	-0.146076	-0.140282	-0.134525	-0.128819	-0.123179	-0.117619	-0.112153	-0.106796	-0.101558	-0.0964532	-0.0914909	-0.0866811	-0.082032	-0.0775509	-0.0732439	-0.0691162
2	sub-20	1	20	-0.91565	-0.914536	-0.913342	-0.91206	-0.910679	-0.909191	-0.907584	-0.905848	-0.903971	-0.901943	-0.899752	-0.897385	-0.894832	-0.89208	-0.889116	-0.885928	-0.882505	-0.878833	-0.874902	-0.8707	-0.866216	-0.86144	-0.856362	-0.850976	-0.845274	-0.839252	-0.832905	-0.826232	-0.819231	-0.811903	-0.804251	-0.796279	-0.787991	-0.779394	-0.770496	-0.761305	-0.751833	-0.74209	-0.732088	-0.721839	-0.711359	-0.700661	-0.68976	-0.678673	-0.667417	-0.65601
3	sub-20	1	80	-0.0717509	-0.0738164	-0.0758297	-0.0777887	-0.0796918	-0.0815373	-0.0833242	-0.0850515	-0.0867182	-0.0883237	-0.0898673	-0.0913483	-0.0927661	-0.0941203	-0.0954102	-0.0966352	-0.0977947	-0.098888	-0.0999144	-0.100873	-0.101762	-0.102582	-0.10333	-0.104006	-0.104607	-0.105134	-0.105583	-0.105954	-0.106245	-0.106457	-0.106587	-0.106636	-0.106602	-0.106487	-0.106289	-0.10601	-0.105651	-0.105212	-0.104695	-0.104102	-0.103435	-0.102697	-0.101891	-0.101019	-0.100086	-0.0990958
0	sub-21	0	20	-0.26611	-0.263235	-0.260237	-0.257113	-0.253862	-0.250483	-0.246977	-0.243347	-0.239595	-0.235727	-0.231748	-0.227665	-0.223486	-0.219219	-0.214872	-0.210456	-0.205979	-0.201451	-0.196883	-0.192283	-0.187662	-0.18303	-0.178395	-0.173767	-0.169156	-0.16457	-0.160019	-0.155513	-0.15106	-0.146671	-0.142355	-0.138123	-0.133984	-0.12995	-0.126031	-0.122237	-0.118579	-0.115067	-0.111711	-0.108522	-0.105509	-0.102679	-0.100043	-0.0976068	-0.0953778	-0.0933619
1	sub-21	0	80	-1.11557	-1.0918	-1.06916	-1.04765	-1.02727	-1.00798	-0.989771	-0.972617	-0.956489	-0.941352	-0.92717	-0.913902	-0.901506	-0.889935	-0.879141	-0.869073	-0.859681	-0.850911	-0.842708	-0.835019	-0.827789	-0.820963	-0.81449	-0.808316	-0.802392	-0.796668	-0.791098	-0.785638	-0.780247	-0.774885	-0.769518	-0.764113	-0.758639	-0.753072	-0.747386	-0.741561	-0.735579	-0.729424	-0.723084	-0.716549	-0.709812	-0.702869	-0.695718	-0.688361	-0.680801	-0.673041
2	sub-21	1	20	1.43342	1.41755	1.40139	1.38491	1.36813	1.35102	1.33358	1.31581	1.2977	1.27924	1.26043	1.24127	1.22174	1.20186	1.18161	1.16101	1.14006	1.11876	1.09712	1.07516	1.05288	1.03029	1.00743	0.984299	0.96093	0.937346	0.913574	0.889644	0.865587	0.841437	0.817229	0.793	0.768787	0.744629	0.720565	0.696634	0.672876	0.649331	0.626039	0.603041	0.580377	0.558087	0.536209	0.514782	0.493844	0.47343
3	sub-21	1	80	-0.443624	-0.438295	-0.432982	-0.427686	-0.422412	-0.41716	-0.411933	-0.406732	-0.40156	-0.396417	-0.391307	-0.38623	-0.381189	-0.376186	-0.371223	-0.366303	-0.361428	-0.356603	-0.351831	-0.347117	-0.342464	-0.337877	-0.333362	-0.328923	-0.324566	-0.320295	-0.316116	-0.312033	-0.30805	-0.304172	-0.300403	-0.296746	-0.293204	-0.28978	-0.286476	-0.283293	-0.280232	-0.277293	-0.274475	-0.271778	-0.2692	-0.266738	-0.26439	-0.262153	-0.260022	-0.257995
0	sub-23	0	20	0.27905	0.277795	0.276454	0.275022	0.273495	0.271866	0.270131	0.268285	0.266321	0.264236	0.262025	0.259682	0.257204	0.254586	0.251823	0.248913	0.24585	0.242631	0.239253	0.235712	0.232004	0.228126	0.224074	0.219847	0.215442	0.210856	0.206089	0.20114	0.19601	0.1907	0.185212	0.17955	0.173719	0.167722	0.161569	0.155265	0.148821	0.142247	0.135553	0.128753	0.12186	0.114888	0.107852	0.100769	0.0936535	0.0865236
1	sub-23	0	80	0.303341	0.297786	0.292232	0.286684	0.281148	0.275629	0.270132	0.264662	0.259222	0.253819	0.248455	0.243135	0.237862	0.23264	0.227472	0.22236	0.217306	0.212311	0.207378	0.202507	0.197697	0.19295	0.188265	0.18364	0.179074	0.174566	0.170114	0.165716	0.16137	0.157072	0.152822	0.148615	0.144451	0.140325	0.136237	0.132184	0.128163	0.124173	0.120213	0.116282	0.112377	0.108501	0.104651	0.100828	0.0970333	0.093267
2	sub-23	1	20	0.235472	0.232833	0.23007	0.227194	0.224215	0.221143	0.217988	0.214762	0.211475	0.208139	0.204765	0.201362	0.197942	0.194515	0.19109	0.187676	0.184281	0.180912	0.177576	0.174278	0.171023	0.167815	0.164655	0.161547	0.158492	0.155489	0.152539	0.14964	0.14679	0.143988	0.141229	0.138511	0.13583	0.133179	0.130555	0.127951	0.125363	0.122783	0.120205	0.117623	0.11503	0.112419	0.109785	0.107119	0.104418	0.101674
3	sub-23	1	80	0.0974916	0.096625	0.0957441	0.0948388	0.0938994	0.0929165	0.0918809	0.0907842	0.0896183	0.0883755	0.0870489	0.0856323	0.0841201	0.0825074	0.0807901	0.0789649	0.0770293	0.0749817	0.0728214	0.0705484	0.0681638	0.0656695	0.0630682	0.0603634	0.0575596	0.054662	0.0516766	0.0486102	0.0454701	0.0422645	0.0390022	0.0356923	0.0323447	0.0289694	0.025577	0.0221781	0.0187836	0.0154046	0.0120521	0.00873699	0.00547017	0.00226221	-0.000876603	-0.00393642	-0.00690786	-0.00978216
0	sub-24	0	20	-1.04669	-1.03303	-1.01858	-1.00339	-0.98748	-0.970908	-0.953713	-0.935941	-0.917638	-0.89885	-0.879624	-0.860006	-0.840042	-0.819779	-0.799259	-0.778527	-0.757625	-0.736591	-0.715464	-0.694279	-0.673068	-0.651863	-0.63069	-0.609577	-0.588545	-0.567617	-0.546813	-0.526149	-0.505641	-0.485304	-0.465149	-0.445185	-0.425422	-0.405864	-0.386518	-0.367387	-0.348472	-0.329775	-0.311296	-0.293034	-0.274987	-0.257153	-0.239528	-0.22211	-0.204892	-0.187872
1	sub-24	0	80	-0.000529756	0.00983918	0.0201338	0.0303295	0.0404034	0.0503348	0.0601046	0.0696963	0.0790949	0.0882879	0.0972646	0.106016	0.114536	0.122818	0.13086	0.138658	0.146214	0.153526	0.160597	0.167428	0.174024	0.180386	0.186519	0.192427	0.198114	0.203583	0.208839	0.213886	0.218726	0.223364	0.227802	0.232043	0.236088	0.239938	0.243593	0.247054	0.250317	0.253381	0.256243	0.258898	0.261341	0.263568	0.265572	0.267347	0.268887	0.270186
2	sub-24	1	20	0.0405399	0.0144444	-0.0117583	-0.0379935	-0.064184	-0.0902506	-0.116112	-0.141686	-0.166889	-0.191637	-0.215845	-0.239431	-0.262312	-0.284407	-0.305636	-0.325922	-0.345189	-0.363364	-0.380376	-0.396157	-0.410643	-0.423773	-0.43549	-0.445743	-0.454483	-0.461669	-0.467261	-0.471229	-0.473544	-0.474186	-0.473137	-0.470387	-0.465931	-0.459773	-0.451919	-0.442385	-0.431192	-0.418368	-0.403949	-0.387976	-0.370498	-0.351569	-0.331251	-0.309612	-0.286726	-0.262674
3	sub-24	1	80	0.286299	0.28571	0.285008	0.284206	0.283316	0.282351	0.281325	0.280253	0.279149	0.278028	0.276906	0.275797	0.274717	0.27368	0.272702	0.271797	0.270979	0.27026	0.269652	0.269167	0.268814	0.268602	0.268538	0.268629	0.26888	0.269296	0.269879	0.270633	0.271557	0.272649	0.273908	0.275329	0.276906	0.278633	0.280501	0.282501	0.284623	0.286855	0.289186	0.291602	0.29409	0.296635	0.299223	0.301838	0.304465	0.307087
0	sub-25	0	20	-0.634849	-0.628387	-0.621946	-0.615544	-0.609198	-0.602925	-0.596742	-0.590664	-0.584706	-0.578882	-0.573205	-0.567687	-0.562337	-0.557163	-0.552171	-0.547366	-0.54275	-0.538323	-0.534084	-0.53003	-0.526153	-0.522447	-0.518902	-0.515506	-0.512246	-0.509107	-0.506072	-0.503123	-0.500241	-0.497406	-0.494595	-0.491786	-0.488954	-0.486075	-0.483124	-0.480073	-0.476898	-0.473571	-0.470067	-0.466361	-0.462428	-0.458247	-0.453795	-0.449055	-0.44401	-0.438647
1	sub-25	0	80	0.00733034	0.00634433	0.00543812	0.00461911	0.00389415	0.00326943	0.00275039	0.00234158	0.00204657	0.00186789	0.00180702	0.0018644	0.0020395	0.00233085	0.00273611	0.00325214	0.00387496	0.00459985	0.00542134	0.0063333	0.00732896	0.00840096	0.00954144	0.010742	0.0119938	0.0132878	0.0146144	0.0159641	0.0173273	0.0186945	0.0200563	0.0214037	0.0227282	0.0240216	0.0252766	0.0264864	0.0276453	0.0287481	0.0297909	0.0307705	0.0316846	0.032532	0.033312	0.0340251	0.0346722	0.0352549
2	sub-25	1	20	-0.687682	-0.681768	-0.675757	-0.669659	-0.663484	-0.657241	-0.650942	-0.644594	-0.63821	-0.631798	-0.625369	-0.618932	-0.612497	-0.606074	-0.599674	-0.593306	-0.58698	-0.580706	-0.574495	-0.568356	-0.562301	-0.556339	-0.550481	-0.544739	-0.539122	-0.533642	-0.528309	-0.523136	-0.518132	-0.513311	-0.508682	-0.504256	-0.500043	-0.496053	-0.492293	-0.488772	-0.485494	-0.482464	-0.479686	-0.47716	-0.474888	-0.472868	-0.471097	-0.469571	-0.468286	-0.467234
3	sub-25	1	80	-0.269103	-0.268161	-0.267136	-0.266024	-0.264819	-0.263519	-0.26212	-0.26062	-0.25902	-0.257318	-0.255515	-0.253612	-0.25161	-0.249512	-0.247319	-0.245035	-0.242662	-0.240203	-0.237661	-0.235039	-0.23234	-0.229566	-0.226721	-0.223806	-0.220824	-0.217775	-0.214663	-0.211489	-0.208252	-0.204956	-0.2016	-0.198187	-0.194717	-0.191192	-0.187614	-0.183985	-0.180306	-0.176581	-0.172813	-0.169005	-0.165161	-0.161286	-0.157383	-0.153458	-0.149516	-0.145562
0	sub-26	0	20	0.281281	0.278658	0.276047	0.273448	0.270857	0.268274	0.265695	0.263115	0.26053	0.257934	0.255321	0.252685	0.250019	0.247314	0.244564	0.241761	0.238896	0.235962	0.23295	0.229854	0.226665	0.223377	0.219984	0.21648	0.21286	0.209121	0.205259	0.201272	0.19716	0.192922	0.188561	0.184079	0.17948	0.174769	0.169953	0.165038	0.160034	0.154949	0.149793	0.144578	0.139315	0.134015	0.12869	0.123354	0.118019	0.112697
1	sub-26	0	80	-0.285031	-0.282843	-0.280625	-0.278378	-0.276105	-0.273805	-0.27148	-0.269128	-0.266747	-0.264337	-0.261896	-0.25942	-0.256908	-0.254356	-0.251762	-0.249123	-0.246436	-0.243697	-0.240904	-0.238055	-0.235145	-0.232174	-0.229137	-0.226034	-0.222862	-0.21962	-0.216306	-0.21292	-0.209461	-0.20593	-0.202325	-0.19865	-0.194903	-0.191088	-0.187207	-0.183262	-0.179256	-0.175192	-0.171075	-0.166908	-0.162695	-0.15844	-0.154148	-0.149823	-0.145469	-0.14109
2	sub-26	1	20	-0.139505	-0.14656	-0.153376	-0.159941	-0.166242	-0.172271	-0.178018	-0.183475	-0.188637	-0.193501	-0.198064	-0.202327	-0.206294	-0.209971	-0.213367	-0.216491	-0.219359	-0.221985	-0.224387	-0.226585	-0.228599	-0.230452	-0.232167	-0.233769	-0.235281	-0.236728	-0.238135	-0.239524	-0.24092	-0.242342	-0.243814	-0.245353	-0.246978	-0.248706	-0.250552	-0.252529	-0.254649	-0.256922	-0.259357	-0.261959	-0.264734	-0.267685	-0.270814	-0.27412	-0.2776	-0.28125
3	sub-26	1	80	0.251852	0.248702	0.245563	0.242431	0.239305	0.236182	0.233059	0.229932	0.226799	0.223655	0.220498	0.217324	0.21413	0.210912	0.207668	0.204393	0.201087	0.197746	0.194368	0.190952	0.187496	0.183999	0.180462	0.176884	0.173265	0.169608	0.165915	0.162186	0.158427	0.15464	0.150829	0.147	0.143157	0.139307	0.135454	0.131606	0.12777	0.123952	0.120159	0.116399	0.112679	0.109007	0.105391	0.101837	0.0983532	0.094947
0	sub-27	0	20	-0.335105	-0.332587	-0.329871	-0.326958	-0.323852	-0.320557	-0.317079	-0.313424	-0.309599	-0.305614	-0.301477	-0.297197	-0.292786	-0.288253	-0.283608	-0.278862	-0.274025	-0.269105	-0.264114	-0.259059	-0.253948	-0.248789	-0.243589	-0.238353	-0.233085	-0.227789	-0.222467	-0.21712	-0.211748	-0.20635	-0.200924	-0.195467	-0.189975	-0.184445	-0.17887	-0.173246	-0.167568	-0.16183	-0.156025	-0.150149	-0.144196	-0.138161	-0.132037	-0.125822	-0.11951	-0.113098
1	sub-27	0	80	0.233744	0.233911	0.233748	0.233262	0.232461	0.231356	0.229961	0.228289	0.226355	0.224177	0.221774	0.219166	0.216372	0.213414	0.210315	0.207095	0.203778	0.200384	0.196935	0.193451	0.189952	0.186454	0.182975	0.179531	0.176134	0.172797	0.169528	0.166337	0.16323	0.160209	0.157278	0.154437	0.151683	0.149013	0.146422	0.143904	0.141449	0.139048	0.136691	0.134366	0.132061	0.129762	0.127457	0.125131	0.122771	0.120363
2	sub-27	1	20	-0.344921	-0.319801	-0.292452	-0.26296	-0.231423	-0.197948	-0.162653	-0.125664	-0.0871153	-0.0471493	-0.00591485	0.0364324	0.0797315	0.123817	0.16852	0.213668	0.259089	0.30461	0.350058	0.395263	0.440056	0.484272	0.527752	0.570337	0.611879	0.652232	0.69126	0.728834	0.764831	0.799141	0.831658	0.86229	0.89095	0.917565	0.942067	0.964401	0.984521	1.00239	1.01798	1.03127	1.04227	1.05096	1.05736	1.06149	1.06338	1.06307
3	sub-27	1	80	-0.0694099	-0.069667	-0.0699194	-0.0701669	-0.070409	-0.0706455	-0.0708758	-0.0710994	-0.0713156	-0.0715237	-0.0717228	-0.0719118	-0.0720897	-0.0722554	-0.0724075	-0.0725448	-0.0726661	-0.0727701	-0.0728555	-0.0729212	-0.0729662	-0.0729895	-0.0729901	-0.0729673	-0.0729203	-0.0728484	-0.0727511	-0.0726275	-0.072477	-0.0722991	-0.072093	-0.0718581	-0.0715939	-0.0712999	-0.0709757	-0.0706212	-0.0702361	-0.0698208	-0.0693754	-0.0689006	-0.0683974	-0.0678668	-0.0673105	-0.0667303	-0.0661283	-0.065507
0	sub-31	0	20	-0.665093	-0.656589	-0.648292	-0.640178	-0.63222	-0.624395	-0.616676	-0.609038	-0.601457	-0.59391	-0.586374	-0.578828	-0.571251	-0.563626	-0.555936	-0.548163	-0.540295	-0.532318	-0.524221	-0.515994	-0.507627	-0.499113	-0.490447	-0.481623	-0.472637	-0.463489	-0.454175	-0.444697	-0.435056	-0.425254	-0.415298	-0.405191	-0.394942	-0.384558	-0.374049	-0.363425	-0.352699	-0.341882	-0.330987	-0.320029	-0.309022	-0.29798	-0.286919	-0.275852	-0.264795	-0.25376
1	sub-31	0	80	-0.772425	-0.768818	-0.765272	-0.761805	-0.758435	-0.755183	-0.752064	-0.749096	-0.746294	-0.743672	-0.741244	-0.739018	-0.737003	-0.735205	-0.733627	-0.732271	-0.731135	-0.730214	-0.729502	-0.728988	-0.72866	-0.728504	-0.7285	-0.72863	-0.72887	-0.729196	-0.72958	-0.729994	-0.730407	-0.730789	-0.731106	-0.731325	-0.731412	-0.731334	-0.731055	-0.730543	-0.729765	-0.728687	-0.72728	-0.725512	-0.723356	-0.720784	-0.717774	-0.714302	-0.710349	-0.705899
2	sub-31	1	20	-0.634263	-0.64627	-0.658266	-0.67022	-0.682095	-0.693853	-0.705455	-0.716856	-0.728012	-0.738877	-0.749402	-0.759538	-0.769236	-0.778445	-0.787118	-0.795205	-0.80266	-0.809437	-0.815495	-0.820791	-0.825288	-0.828951	-0.831746	-0.833645	-0.83462	-0.834648	-0.83371	-0.831788	-0.828869	-0.824941	-0.819997	-0.814033	-0.807046	-0.799039	-0.790015	-0.779982	-0.76895	-0.756932	-0.743944	-0.730005	-0.715138	-0.699369	-0.682729	-0.665252	-0.646977	-0.627949
3	sub-31	1	80	-0.405659	-0.401806	-0.397868	-0.393843	-0.389728	-0.385524	-0.38123	-0.376845	-0.37237	-0.367807	-0.363155	-0.358418	-0.353596	-0.348692	-0.34371	-0.338651	-0.333521	-0.328323	-0.323062	-0.317743	-0.312373	-0.306958	-0.301505	-0.296021	-0.290514	-0.284992	-0.279464	-0.273937	-0.26842	-0.262923	-0.257453	-0.25202	-0.246633	-0.2413	-0.23603	-0.23083	-0.22571	-0.220676	-0.215736	-0.210896	-0.206164	-0.201546	-0.197046	-0.192672	-0.188426	-0.184315
0	sub-32	0	20	-0.997863	-0.988249	-0.978422	-0.9684	-0.958199	-0.94784	-0.937341	-0.926726	-0.916018	-0.905239	-0.894413	-0.883564	-0.872717	-0.861895	-0.851123	-0.840423	-0.829817	-0.819329	-0.808979	-0.798787	-0.788772	-0.77895	-0.769338	-0.759948	-0.750791	-0.741877	-0.733212	-0.724801	-0.716644	-0.708741	-0.701091	-0.693687	-0.686525	-0.679595	-0.672887	-0.666392	-0.660096	-0.653987	-0.648051	-0.642272	-0.636635	-0.631125	-0.625726	-0.620421	-0.615195	-0.610031
1	sub-32	0	80	-1.05357	-1.06122	-1.06856	-1.07558	-1.08223	-1.0885	-1.09435	-1.09974	-1.10464	-1.10902	-1.11282	-1.11603	-1.1186	-1.12048	-1.12166	-1.12208	-1.12171	-1.12051	-1.11845	-1.11551	-1.11164	-1.10682	-1.10102	-1.09422	-1.0864	-1.07755	-1.06764	-1.05667	-1.04464	-1.03152	-1.01734	-1.00209	-0.985767	-0.968396	-0.949988	-0.930559	-0.910134	-0.888737	-0.8664	-0.843158	-0.819051	-0.794123	-0.768423	-0.742007	-0.714933	-0.687266
2	sub-32	1	20	5.2325	5.20313	5.17383	5.14459	5.11542	5.0863	5.05722	5.02818	4.99917	4.97018	4.94122	4.91227	4.88332	4.85437	4.82541	4.79645	4.76746	4.73845	4.70941	4.68034	4.65123	4.62207	4.59287	4.56361	4.53429	4.50491	4.47546	4.44595	4.41635	4.38668	4.35693	4.32709	4.29716	4.26714	4.23703	4.20683	4.17652	4.14612	4.11562	4.08501	4.05431	4.0235	3.99259	3.96158	3.93047	3.89926
3	sub-32	1	80	-0.765196	-0.763695	-0.762286	-0.760969	-0.75974	-0.758598	-0.757536	-0.756551	-0.755636	-0.754785	-0.753991	-0.753246	-0.752541	-0.751866	-0.751211	-0.750566	-0.749919	-0.749258	-0.748569	-0.747839	-0.747053	-0.746196	-0.745254	-0.744209	-0.743046	-0.741748	-0.740298	-0.738679	-0.736877	-0.734874	-0.732656	-0.730208	-0.727516	-0.724567	-0.721349	-0.717851	-0.714062	-0.709974	-0.705578	-0.700867	-0.695837	-0.690483	-0.684804	-0.678797	-0.672465	-0.66581
0	sub-33	0	20	0.128395	0.140613	0.152981	0.165468	0.178042	0.190667	0.203305	0.215916	0.228456	0.240881	0.253141	0.26519	0.276976	0.288448	0.299556	0.310246	0.320468	0.330172	0.339307	0.347824	0.355676	0.362814	0.369192	0.374765	0.379488	0.383318	0.386215	0.388138	0.389052	0.388923	0.387719	0.385415	0.381988	0.377419	0.371697	0.364812	0.356765	0.347557	0.337202	0.325714	0.313119	0.299447	0.284735	0.269027	0.252371	0.234824
1	sub-33	0	80	-0.15654	-0.183819	-0.210279	-0.235902	-0.26067	-0.284572	-0.307599	-0.329746	-0.351011	-0.371396	-0.390904	-0.409545	-0.427329	-0.44427	-0.460383	-0.475687	-0.490204	-0.503957	-0.516971	-0.529274	-0.540895	-0.551867	-0.562222	-0.571996	-0.581227	-0.58995	-0.598207	-0.606037	-0.613479	-0.620575	-0.627366	-0.63389	-0.640188	-0.646296	-0.652252	-0.658089	-0.663841	-0.669538	-0.675209	-0.680881	-0.686579	-0.692327	-0.698147	-0.704061	-0.710088	-0.716245
2	sub-33	1	20	-0.151993	-0.152196	-0.152656	-0.153348	-0.15425	-0.155335	-0.156582	-0.157967	-0.159465	-0.161053	-0.162706	-0.1644	-0.166109	-0.167806	-0.169463	-0.171052	-0.172543	-0.173904	-0.175102	-0.176104	-0.176875	-0.177378	-0.177577	-0.177435	-0.176915	-0.175982	-0.174601	-0.172741	-0.17037	-0.167459	-0.163985	-0.159923	-0.155255	-0.149966	-0.144042	-0.137478	-0.130268	-0.122415	-0.113924	-0.104804	-0.0950693	-0.0847389	-0.0738357	-0.0623871	-0.0504245	-0.0379839
3	sub-33	1	80	0.00324497	0.00473938	0.00652362	0.00857655	0.0108756	0.0133971	0.0161157	0.0190055	0.0220395	0.0251897	0.0284277	0.0317244	0.03505	0.0383745	0.0416677	0.0448993	0.0480391	0.0510572	0.0539244	0.0566122	0.0590928	0.0613394	0.0633266	0.0650301	0.0664271	0.067496	0.0682173	0.0685726	0.0685457	0.0681219	0.0672884	0.0660343	0.0643505	0.0622296	0.0596661	0.0566565	0.0531985	0.0492916	0.0449369	0.0401367	0.0348944	0.0292147	0.0231036	0.0165679	0.00961555	0.00225547
[truncated: 1,704 more columns]

## Sheet: panel A conservative
	subject	correct	frequency	0	1	2	3	4	5	6	7	8	9	10	11	12	13	14	15	16	17	18	19	20	21	22	23	24	25	26	27	28	29	30	31	32	33	34	35	36	37	38	39	40	41	42	43	44	45
0	sub-1	0	20	-0.168206	-0.168797	-0.169583	-0.170562	-0.171731	-0.173083	-0.174613	-0.176312	-0.178171	-0.180178	-0.182321	-0.184586	-0.186957	-0.189419	-0.191954	-0.194544	-0.197169	-0.19981	-0.202446	-0.205056	-0.20762	-0.210117	-0.212525	-0.214824	-0.216992	-0.219009	-0.220854	-0.222508	-0.223952	-0.225167	-0.226135	-0.226842	-0.227271	-0.227408	-0.227243	-0.226763	-0.22596	-0.224828	-0.223361	-0.221555	-0.21941	-0.216927	-0.214108	-0.210958	-0.207484	-0.203693
1	sub-1	0	80	-0.00373134	-0.00124617	0.00115779	0.00346903	0.00567599	0.00776714	0.00973115	0.011557	0.013234	0.0147525	0.0161033	0.0172786	0.0182715	0.0190766	0.0196898	0.0201085	0.0203316	0.0203594	0.0201937	0.0198376	0.0192956	0.0185733	0.0176774	0.0166158	0.0153969	0.0140303	0.012526	0.0108946	0.00914748	0.00729608	0.00535233	0.00332827	0.00123597	-0.000912565	-0.00223079	-0.00445819	-0.00670738	-0.00896767	-0.0112289	-0.0134814	-0.0157164	-0.0179257	-0.020102	-0.0222387	-0.0243302	-0.0263716
2	sub-1	1	20	0.109414	0.10357	0.0973329	0.0907765	0.0839746	0.077001	0.0699289	0.0628301	0.055775	0.0488313	0.0420645	0.0355367	0.0293067	0.0234298	0.0179569	0.012935	0.00840609	0.00440769	0.000972177	-0.00187325	-0.0041067	-0.00571168	-0.00667707	-0.00699711	-0.00667129	-0.00570412	-0.00410499	-0.00188784	0.000928988	0.00432311	0.00826832	0.0127349	0.0176899	0.0230976	0.0289195	0.035115	0.0416414	0.0484544	0.0555083	0.0627564	0.0701514	0.0776456	0.0851912	0.0927407	0.100247	0.107665
3	sub-1	1	80	0.00674925	0.00697925	0.00700642	0.00683334	0.00646348	0.00590118	0.00515166	0.00422092	0.00311576	0.00184372	0.000413028	-0.00116742	-0.00288814	-0.00473908	-0.0067097	-0.008789	-0.0109656	-0.0132277	-0.0155633	-0.0179602	-0.0204061	-0.0228884	-0.0253948	-0.027913	-0.0304305	-0.0329353	-0.0354155	-0.0378593	-0.0402555	-0.0425929	-0.0448609	-0.0470492	-0.049148	-0.0511479	-0.0530401	-0.0548162	-0.0564685	-0.0579895	-0.05917	-0.0604089	-0.0614975	-0.0624305	-0.0632029	-0.0638102	-0.0642485	-0.0645139
0	sub-4	0	20	0.514116	0.510416	0.506508	0.502385	0.498035	0.49345	0.488621	0.483539	0.478198	0.472589	0.466709	0.460553	0.454116	0.447397	0.440396	0.433112	0.425548	0.417707	0.409594	0.401216	0.39258	0.383697	0.374579	0.365236	0.355685	0.345939	0.336018	0.325938	0.315719	0.305383	0.294951	0.284446	0.273891	0.26331	0.252728	0.24217	0.231662	0.221229	0.210898	0.200694	0.190644	0.180772	0.171106	0.161668	0.152484	0.143577
1	sub-4	0	80	0.407597	0.408347	0.409246	0.410286	0.411459	0.412755	0.414166	0.415679	0.417282	0.418963	0.420706	0.422498	0.424321	0.426161	0.427999	0.429817	0.431598	0.433323	0.434973	0.436528	0.43797	0.439279	0.440435	0.44142	0.442213	0.442798	0.443156	0.44327	0.443124	0.442703	0.441993	0.440983	0.439662	0.43802	0.43605	0.433747	0.431105	0.428124	0.424801	0.421138	0.417137	0.412802	0.408138	0.403153	0.397855	0.392253
2	sub-4	1	20	0.586965	0.582021	0.577781	0.574252	0.571438	0.56934	0.56796	0.567295	0.567343	0.568099	0.569557	0.571707	0.574542	0.578049	0.582216	0.587027	0.592467	0.598517	0.605158	0.612367	0.62012	0.628393	0.637157	0.646383	0.656041	0.666095	0.676513	0.687257	0.698289	0.709569	0.721058	0.732713	0.744493	0.756354	0.768253	0.780146	0.791989	0.803739	0.815352	0.826783	0.837989	0.848927	0.859554	0.869827	0.879705	0.889145
3	sub-4	1	80	-0.0248944	-0.0234331	-0.0219108	-0.0203288	-0.018689	-0.0169939	-0.0152464	-0.01345	-0.0116088	-0.00972705	-0.00780973	-0.00586201	-0.00388936	-0.00189751	0.000107639	0.00212012	0.00413392	0.00614311	0.00814188	0.0101247	0.0120861	0.0140213	0.0159257	0.0177949	0.0196253	0.0214135	0.0231567	0.0248525	0.0264991	0.0280952	0.02964	0.0311333	0.0325751	0.0339662	0.0353076	0.0366007	0.0378472	0.0390491	0.0402084	0.0413275	0.0424085	0.0434539	0.0444659	0.0454468	0.0463986	0.0473233
0	sub-5	0	20	0.129354	0.128822	0.128332	0.127888	0.127495	0.127157	0.126876	0.126655	0.126495	0.126398	0.126363	0.126392	0.126485	0.12664	0.126859	0.127141	0.127484	0.127889	0.128355	0.12888	0.129465	0.130107	0.130806	0.131559	0.132365	0.133219	0.13412	0.135061	0.136039	0.137045	0.138074	0.139118	0.140167	0.141212	0.142244	0.143252	0.144227	0.145157	0.146034	0.146847	0.147586	0.148243	0.148809	0.149278	0.149642	0.149895
1	sub-5	0	80	0.139617	0.138951	0.138115	0.137119	0.135978	0.134705	0.133316	0.131828	0.130258	0.128625	0.126947	0.125243	0.123533	0.121834	0.120164	0.118541	0.116983	0.115504	0.114119	0.112842	0.111686	0.11066	0.109775	0.109038	0.108455	0.10803	0.107767	0.107666	0.107726	0.107946	0.108322	0.108849	0.109519	0.110328	0.111264	0.112321	0.113488	0.114755	0.116113	0.11755	0.119056	0.120622	0.122239	0.123896	0.125587	0.127304
2	sub-5	1	20	-0.732132	-0.736576	-0.740559	-0.744023	-0.746912	-0.74917	-0.750745	-0.751588	-0.751655	-0.750903	-0.749297	-0.746804	-0.743398	-0.739059	-0.73377	-0.727522	-0.720313	-0.712146	-0.703031	-0.692984	-0.682027	-0.670189	-0.657506	-0.644019	-0.629775	-0.614829	-0.599239	-0.583071	-0.566395	-0.549287	-0.531825	-0.514095	-0.496184	-0.478183	-0.460183	-0.442282	-0.424574	-0.407156	-0.390125	-0.373574	-0.357597	-0.342284	-0.327721	-0.313989	-0.301165	-0.28932
3	sub-5	1	80	-0.3877	-0.383219	-0.378838	-0.374438	-0.370027	-0.365613	-0.361205	-0.356808	-0.352431	-0.348079	-0.343758	-0.339473	-0.335227	-0.330769	-0.326611	-0.3225	-0.318434	-0.314415	-0.310439	-0.306504	-0.302608	-0.298745	-0.29491	-0.291097	-0.287299	-0.283509	-0.279718	-0.275918	-0.272099	-0.268251	-0.264365	-0.260431	-0.256438	-0.252376	-0.248235	-0.244005	-0.239676	-0.235111	-0.230557	-0.225878	-0.221066	-0.216115	-0.211021	-0.205777	-0.200383	-0.194836
0	sub-7	0	20	0.587824	0.586874	0.585798	0.584583	0.583219	0.581692	0.579991	0.578104	0.576019	0.573726	0.571212	0.568468	0.565485	0.562255	0.558768	0.55502	0.551005	0.546718	0.542157	0.537322	0.532211	0.526827	0.521173	0.515253	0.509074	0.502644	0.495972	0.489069	0.481947	0.47462	0.467103	0.459412	0.451565	0.443579	0.435475	0.427273	0.418993	0.410657	0.402286	0.393902	0.385528	0.377184	0.368891	0.360672	0.352545	0.344529
1	sub-7	0	80	-0.264302	-0.267648	-0.270972	-0.274259	-0.277492	-0.280654	-0.283729	-0.2867	-0.289552	-0.29227	-0.294841	-0.29725	-0.299487	-0.301539	-0.303397	-0.305053	-0.306497	-0.307723	-0.308725	-0.309499	-0.31004	-0.310346	-0.310414	-0.310243	-0.309834	-0.309187	-0.308304	-0.307188	-0.305843	-0.304273	-0.302484	-0.300482	-0.298275	-0.295869	-0.293276	-0.290502	-0.28756	-0.284458	-0.281209	-0.277824	-0.274314	-0.270691	-0.266968	-0.263158	-0.259273	-0.255326
2	sub-7	1	20	-0.60697	-0.602211	-0.596958	-0.591223	-0.585019	-0.578362	-0.571271	-0.563765	-0.555868	-0.547604	-0.538999	-0.53008	-0.520877	-0.511421	-0.501743	-0.491875	-0.481853	-0.47171	-0.461482	-0.451203	-0.440909	-0.430636	-0.420419	-0.410293	-0.400292	-0.390451	-0.380801	-0.371375	-0.362202	-0.353311	-0.34473	-0.336484	-0.328596	-0.321088	-0.31398	-0.30729	-0.301034	-0.295227	-0.289881	-0.285005	-0.280609	-0.276698	-0.273275	-0.270343	-0.267902	-0.265947
3	sub-7	1	80	-0.0976056	-0.0962549	-0.094927	-0.0936277	-0.0923626	-0.0911375	-0.089958	-0.0888292	-0.0877562	-0.0867436	-0.0857955	-0.0849157	-0.0841072	-0.0833727	-0.0827142	-0.0821329	-0.0816298	-0.0812052	-0.0808587	-0.0805896	-0.0803969	-0.0802788	-0.0802336	-0.0802591	-0.0803528	-0.0805122	-0.0807346	-0.0810173	-0.0813573	-0.0817519	-0.0821984	-0.0826943	-0.083237	-0.0838244	-0.0844544	-0.0851253	-0.0858356	-0.086584	-0.0873698	-0.0881922	-0.089051	-0.089946	-0.0908775	-0.0918457	-0.0928514	-0.0938952
0	sub-9	0	20	-0.0619489	-0.0661061	-0.0702464	-0.0743662	-0.0784624	-0.0825321	-0.0865731	-0.0905836	-0.0945623	-0.0985085	-0.102422	-0.106304	-0.110154	-0.113976	-0.117771	-0.121543	-0.125295	-0.12903	-0.132753	-0.136468	-0.14018	-0.143892	-0.147609	-0.151335	-0.155073	-0.158826	-0.162598	-0.16639	-0.170204	-0.174041	-0.1779	-0.181782	-0.185684	-0.189603	-0.193538	-0.197483	-0.201432	-0.205381	-0.209319	-0.21324	-0.217133	-0.220987	-0.224791	-0.228531	-0.232195	-0.235769
1	sub-9	0	80	0.321936	0.324206	0.326698	0.329384	0.332233	0.335215	0.338298	0.341448	0.344634	0.347821	0.350977	0.354069	0.357063	0.359927	0.36263	0.365142	0.367433	0.369477	0.371248	0.37272	0.373874	0.374687	0.375142	0.375222	0.374915	0.374207	0.373091	0.371558	0.369604	0.367227	0.364428	0.361208	0.357573	0.353529	0.349085	0.344253	0.339045	0.333474	0.327557	0.321311	0.314754	0.307904	0.30078	0.293404	0.285796	0.277977
2	sub-9	1	20	-0.246683	-0.255064	-0.263655	-0.272443	-0.281414	-0.290553	-0.299842	-0.309265	-0.318802	-0.328434	-0.33814	-0.347899	-0.357686	-0.36748	-0.377256	-0.38699	-0.396656	-0.40623	-0.415685	-0.424998	-0.434142	-0.443093	-0.451827	-0.46032	-0.468551	-0.476496	-0.484136	-0.49145	-0.49842	-0.505027	-0.511256	-0.51709	-0.522516	-0.527521	-0.532092	-0.536221	-0.539898	-0.543114	-0.545862	-0.548136	-0.549931	-0.551241	-0.552064	-0.552394	-0.55223	-0.55157
3	sub-9	1	80	0.07727	0.0750241	0.0728598	0.0707824	0.0687968	0.0669073	0.065118	0.063432	0.0618523	0.0603812	0.0590205	0.0577718	0.0566358	0.0556132	0.0547039	0.0539076	0.0532234	0.0526501	0.0521858	0.0518286	0.0515758	0.0514246	0.0513717	0.0514134	0.0515457	0.0517644	0.052065	0.0524426	0.0528922	0.0534085	0.053986	0.0546191	0.0553018	0.056028	0.0567915	0.0575861	0.0584052	0.0592425	0.0600916	0.0609461	0.0617999	0.0626471	0.0634819	0.0642991	0.0650936	0.0658608
0	sub-10	0	20	-0.344877	-0.340765	-0.336415	-0.331828	-0.327004	-0.321946	-0.316657	-0.311142	-0.305407	-0.299459	-0.293308	-0.286962	-0.280435	-0.273738	-0.266885	-0.259891	-0.252773	-0.245546	-0.238228	-0.230836	-0.223389	-0.215904	-0.208399	-0.200892	-0.1934	-0.185939	-0.178526	-0.171177	-0.163905	-0.156724	-0.149648	-0.142687	-0.135852	-0.129154	-0.1226	-0.116199	-0.109958	-0.103881	-0.0979745	-0.092242	-0.0866868	-0.0813115	-0.0761176	-0.0711062	-0.0662776	-0.0616316
1	sub-10	0	80	-1.51676	-1.50471	-1.49261	-1.48048	-1.46833	-1.45618	-1.44403	-1.43191	-1.41982	-1.40778	-1.39578	-1.38386	-1.372	-1.36022	-1.34852	-1.3369	-1.32536	-1.3139	-1.30252	-1.2912	-1.27994	-1.26873	-1.25755	-1.24639	-1.23524	-1.22408	-1.21288	-1.20164	-1.19034	-1.17895	-1.16746	-1.15586	-1.14412	-1.13223	-1.12018	-1.10795	-1.09553	-1.0829	-1.07007	-1.05701	-1.04372	-1.03019	-1.01642	-1.00239	-0.988113	-0.973575
2	sub-10	1	20	-1.60002	-1.59548	-1.59133	-1.58756	-1.58412	-1.58096	-1.57806	-1.57538	-1.57287	-1.57049	-1.56822	-1.56603	-1.56388	-1.56175	-1.55963	-1.55749	-1.55534	-1.55315	-1.55094	-1.5487	-1.54644	-1.54418	-1.54193	-1.53972	-1.53756	-1.53548	-1.5335	-1.53165	-1.52996	-1.52846	-1.52716	-1.5261	-1.52529	-1.52475	-1.5245	-1.52453	-1.52487	-1.52549	-1.5264	-1.52758	-1.529	-1.53064	-1.53245	-1.53439	-1.53641	-1.53845
3	sub-10	1	80	-0.0732631	-0.0712517	-0.0693047	-0.0674193	-0.0655925	-0.0638209	-0.0621008	-0.0604281	-0.0587984	-0.0572073	-0.0556498	-0.054121	-0.0526155	-0.0511281	-0.0496535	-0.0481861	-0.0467207	-0.045252	-0.043775	-0.0422847	-0.0407766	-0.0392466	-0.0376907	-0.0361055	-0.0344881	-0.032836	-0.0311473	-0.0294204	-0.0276546	-0.0258496	-0.0240056	-0.0221235	-0.0202045	-0.0182506	-0.0162639	-0.0142473	-0.0122036	-0.0101362	-0.00804867	-0.00594468	-0.00382805	-0.00170262	0.000427787	0.00255941	0.00468862	0.00681199
0	sub-11	0	20	0.0299678	0.0348123	0.0397591	0.0448006	0.0499283	0.0551336	0.0604071	0.065739	0.071119	0.0765364	0.08198	0.0874384	0.0928998	0.0983524	0.103784	0.109183	0.114538	0.119835	0.125065	0.130215	0.135273	0.14023	0.145074	0.149795	0.154382	0.158826	0.163118	0.167248	0.171209	0.174992	0.178589	0.181996	0.185204	0.188211	0.191011	0.1936	0.195977	0.198139	0.200085	0.201817	0.203333	0.204637	0.20573	0.206616	0.207299	0.207782
1	sub-11	0	80	0.132969	0.136849	0.140293	0.143322	0.145961	0.148233	0.150165	0.151782	0.153112	0.15418	0.155014	0.155637	0.156075	0.156352	0.156488	0.156503	0.156417	0.156244	0.156	0.155694	0.155338	0.154938	0.154499	0.154024	0.153515	0.152969	0.152386	0.15176	0.151086	0.150359	0.149571	0.148715	0.147783	0.146768	0.145665	0.144466	0.143166	0.141763	0.140252	0.138631	0.136901	0.135062	0.133114	0.131063	0.128911	0.126666
2	sub-11	1	20	-0.537712	-0.534914	-0.531209	-0.526658	-0.521323	-0.515266	-0.508548	-0.501232	-0.493376	-0.48504	-0.47628	-0.46715	-0.4577	-0.447981	-0.438038	-0.427914	-0.41765	-0.407286	-0.396858	-0.3864	-0.375946	-0.365526	-0.35517	-0.344909	-0.334768	-0.324776	-0.314959	-0.305342	-0.295949	-0.286805	-0.277932	-0.269353	-0.261089	-0.25316	-0.245586	-0.238383	-0.23157	-0.225162	-0.219173	-0.213617	-0.208506	-0.203851	-0.199661	-0.195943	-0.192703	-0.189944
3	sub-11	1	80	0.0995266	0.0997666	0.100038	0.100345	0.100692	0.101083	0.101523	0.102013	0.102557	0.103156	0.103814	0.104529	0.105304	0.106139	0.107034	0.107987	0.108999	0.110066	0.111188	0.112362	0.113584	0.114852	0.11616	0.117505	0.118882	0.120285	0.124954	0.126385	0.127824	0.129265	0.1307	0.132122	0.133523	0.134895	0.13623	0.13752	0.138756	0.139931	0.141035	0.142062	0.143002	0.14385	0.144596	0.145236	0.145763	0.14617
0	sub-12	0	20	-0.43712	-0.431742	-0.426495	-0.42136	-0.41632	-0.411358	-0.406458	-0.401605	-0.396784	-0.391983	-0.38719	-0.382396	-0.377591	-0.372768	-0.367921	-0.363045	-0.358136	-0.353192	-0.34821	-0.343192	-0.338137	-0.333047	-0.327925	-0.322773	-0.317597	-0.312401	-0.307191	-0.301973	-0.296753	-0.291539	-0.286338	-0.281156	-0.276002	-0.270882	-0.265805	-0.260778	-0.255807	-0.250901	-0.246066	-0.241309	-0.236635	-0.232053	-0.227567	-0.223183	-0.218906	-0.214742
1	sub-12	0	80	0.228768	0.228006	0.227182	0.226279	0.225282	0.224176	0.222949	0.221587	0.220078	0.218413	0.216582	0.214579	0.212398	0.210035	0.207487	0.204754	0.201837	0.198738	0.19546	0.19201	0.188394	0.184618	0.180693	0.176627	0.172431	0.168115	0.16369	0.159166	0.154556	0.14987	0.145119	0.140312	0.135458	0.130568	0.125649	0.120708	0.115751	0.110785	0.105813	0.100839	0.0958664	0.0908967	0.0859312	0.0809704	0.0760143	0.0710621
2	sub-12	1	20	-0.226305	-0.219517	-0.212842	-0.206301	-0.199917	-0.193711	-0.187703	-0.181916	-0.17637	-0.171084	-0.166077	-0.161367	-0.156971	-0.152904	-0.14918	-0.145812	-0.142813	-0.140191	-0.137957	-0.136117	-0.134677	-0.133643	-0.133018	-0.132803	-0.133	-0.133607	-0.134625	-0.136049	-0.137876	-0.140102	-0.14272	-0.145723	-0.149104	-0.152855	-0.156965	-0.161426	-0.166226	-0.171354	-0.176798	-0.182545	-0.188581	-0.194892	-0.201462	-0.208274	-0.215312	-0.222558
3	sub-12	1	80	-0.560703	-0.55781	-0.554742	-0.551494	-0.548064	-0.544446	-0.540638	-0.536636	-0.532439	-0.528044	-0.523449	-0.518654	-0.513659	-0.508463	-0.503069	-0.497477	-0.49169	-0.485712	-0.479547	-0.473198	-0.466672	-0.459973	-0.45311	-0.446087	-0.434656	-0.427342	-0.419893	-0.412317	-0.404621	-0.396816	-0.388908	-0.380908	-0.372823	-0.364662	-0.356434	-0.348147	-0.339809	-0.331428	-0.323012	-0.314568	-0.306103	-0.297625	-0.289138	-0.28065	-0.272166	-0.26369
0	sub-13	0	20	0.435967	0.430324	0.424571	0.418709	0.412739	0.406664	0.400489	0.394218	0.387859	0.381417	0.374902	0.368319	0.361679	0.354988	0.348256	0.341491	0.334699	0.327888	0.321064	0.314231	0.307395	0.300558	0.293723	0.286891	0.280062	0.273236	0.266411	0.259585	0.252755	0.24592	0.239074	0.232216	0.225343	0.21845	0.211535	0.204597	0.197634	0.190645	0.186696	0.17965	0.172578	0.165483	0.158367	0.151235	0.144089	0.136935
1	sub-13	0	80	0.0353041	0.0335034	0.0316811	0.0298383	0.0279757	0.0260936	0.0241917	0.022269	0.0203239	0.018354	0.0163562	0.0143266	0.0122608	0.0101533	0.00799855	0.00579028	0.00352208	0.00118742	-0.00122007	-0.00370648	-0.00627738	-0.00893765	-0.0116914	-0.0145416	-0.0174904	-0.0205385	-0.0236857	-0.0269304	-0.0302699	-0.0337004	-0.0372168	-0.040813	-0.0444818	-0.0482146	-0.0520022	-0.0558338	-0.0535625	-0.0574541	-0.0613524	-0.0652433	-0.0691118	-0.0729426	-0.0767199	-0.0804276	-0.0840495	-0.0875698
2	sub-13	1	20	0.674925	0.669428	0.662804	0.655109	0.646406	0.636762	0.626251	0.614952	0.602948	0.590326	0.577179	0.563599	0.549682	0.535525	0.521225	0.506875	0.49257	0.4784	0.464449	0.450801	0.437529	0.424704	0.412389	0.400637	0.389495	0.379001	0.369183	0.360062	0.351647	0.343939	0.33693	0.330603	0.32493	0.319878	0.315403	0.311454	0.307973	0.304895	0.302147	0.299654	0.297333	0.295099	0.292863	0.290537	0.28803	0.285251
3	sub-13	1	80	0.18339	0.181623	0.179904	0.178236	0.176623	0.175065	0.173566	0.172126	0.170745	0.169424	0.168161	0.166955	0.165806	0.164711	0.163667	0.162674	0.161728	0.160825	0.159964	0.159141	0.158353	0.157596	0.156869	0.156167	0.155487	0.154828	0.154186	0.153559	0.152945	0.152344	0.151753	0.151172	0.150601	0.150039	0.149487	0.148946	0.148415	0.147897	0.147392	0.146902	0.146427	0.145969	0.145529	0.145107	0.144705	0.144322
0	sub-15	0	20	-0.663607	-0.650683	-0.637175	-0.623166	-0.60874	-0.59398	-0.578964	-0.56377	-0.548473	-0.533141	-0.517841	-0.502634	-0.487578	-0.472724	-0.45812	-0.44381	-0.429833	-0.416223	-0.403012	-0.390228	-0.377893	-0.36603	-0.354657	-0.343791	-0.333446	-0.323637	-0.314374	-0.305667	-0.297527	-0.289961	-0.282977	-0.276584	-0.270789	-0.265602	-0.261032	-0.257089	-0.253783	-0.251125	-0.249125	-0.247789	-0.247126	-0.247139	-0.247829	-0.249192	-0.251222	-0.253906
1	sub-15	0	80	-0.0819735	-0.0835874	-0.0851002	-0.086442	-0.0875419	-0.0883282	-0.0887296	-0.0886759	-0.0880987	-0.0869321	-0.085113	-0.0825817	-0.0792825	-0.0751641	-0.0701807	-0.0642924	-0.0574657	-0.0496745	-0.0409001	-0.0311311	-0.0203639	-0.00860181	0.00414522	0.0178613	0.0325251	0.0481109	0.0645892	0.0819274	0.100091	0.119044	0.13875	0.159173	0.180278	0.20203	0.224396	0.247343	0.27084	0.294859	0.319373	0.344354	0.369776	0.395615	0.421841	0.448427	0.475338	0.502538
2	sub-15	1	20	-1.14054	-1.18576	-1.22992	-1.27283	-1.31433	-1.35426	-1.39246	-1.42879	-1.46311	-1.49531	-1.52526	-1.55288	-1.57808	-1.6008	-1.62097	-1.63856	-1.65355	-1.66593	-1.67572	-1.68292	-1.68759	-1.68978	-1.68955	-1.68699	-1.68219	-1.67526	-1.66633	-1.65551	-1.64295	-1.6288	-1.61323	-1.59639	-1.57847	-1.55964	-1.54008	-1.51999	-1.49956	-1.47897	-1.45842	-1.43809	-1.41817	-1.39885	-1.38031	-1.3627	-1.34621	-1.33098
3	sub-15	1	80	-0.518824	-0.508726	-0.498978	-0.48957	-0.480493	-0.471735	-0.463287	-0.455137	-0.447276	-0.439694	-0.432382	-0.425332	-0.418535	-0.411986	-0.405679	-0.399606	-0.393763	-0.388142	-0.382735	-0.377535	-0.372533	-0.367718	-0.36308	-0.358608	-0.35429	-0.350115	-0.346073	-0.342152	-0.338342	-0.334634	-0.33102	-0.327491	-0.32404	-0.320661	-0.31735	-0.314103	-0.310919	-0.307796	-0.304736	-0.301741	-0.298816	-0.295967	-0.2932	-0.290525	-0.287954	-0.285498
0	sub-16	0	20	-0.667754	-0.667589	-0.667468	-0.667371	-0.667282	-0.667184	-0.667057	-0.666885	-0.666649	-0.666333	-0.66592	-0.665393	-0.664737	-0.663936	-0.662978	-0.661848	-0.660534	-0.659025	-0.657311	-0.655384	-0.653235	-0.650859	-0.648249	-0.645404	-0.642319	-0.638993	-0.635426	-0.631618	-0.627572	-0.623289	-0.618773	-0.614028	-0.609059	-0.603872	-0.598473	-0.592869	-0.587066	-0.581072	-0.574896	-0.568546	-0.56203	-0.555358	-0.548538	-0.541581	-0.534495	-0.52729
1	sub-16	0	80	-0.0496639	-0.0551118	-0.0603806	-0.0654557	-0.0703237	-0.0749726	-0.0793916	-0.0835713	-0.0875036	-0.0911819	-0.0946004	-0.0977549	-0.100642	-0.103261	-0.10561	-0.107689	-0.109502	-0.111049	-0.112336	-0.113366	-0.114146	-0.114683	-0.114983	-0.115054	-0.114907	-0.11455	-0.113995	-0.113252	-0.112333	-0.11125	-0.110017	-0.108645	-0.107149	-0.105542	-0.103838	-0.10205	-0.100192	-0.0982773	-0.0963196	-0.0943314	-0.0923249	-0.0903114	-0.0883017	-0.0863052	-0.0843303	-0.0823843
2	sub-16	1	20	-1.29328	-1.28367	-1.27376	-1.26353	-1.25298	-1.24208	-1.23083	-1.2192	-1.20718	-1.19476	-1.18192	-1.16865	-1.15493	-1.14076	-1.12613	-1.11102	-1.09544	-1.07938	-1.06285	-1.04584	-1.02837	-1.01043	-0.99206	-0.97326	-0.954056	-0.934471	-0.914534	-0.894276	-0.873732	-0.852939	-0.831938	-0.810773	-0.789489	-0.768132	-0.74675	-0.725393	-0.70411	-0.682949	-0.661958	-0.641183	-0.620671	-0.600464	-0.580603	-0.561124	-0.542064	-0.523453
3	sub-16	1	80	-0.560431	-0.555131	-0.549783	-0.544395	-0.538974	-0.533528	-0.528063	-0.522588	-0.517109	-0.511633	-0.506165	-0.500713	-0.495281	-0.489875	-0.4845	-0.479161	-0.473862	-0.468606	-0.463397	-0.458238	-0.453132	-0.448079	-0.443083	-0.438143	-0.433261	-0.428438	-0.423673	-0.418965	-0.414315	-0.409721	-0.405183	-0.400698	-0.396266	-0.391884	-0.387551	-0.383264	-0.37902	-0.374817	-0.370653	-0.366524	-0.362426	-0.358358	-0.354315	-0.350295	-0.346293	-0.342306
0	sub-18	0	20	-0.436073	-0.43228	-0.428382	-0.424387	-0.420302	-0.416136	-0.411899	-0.407603	-0.403258	-0.398875	-0.394466	-0.390044	-0.38562	-0.381206	-0.376814	-0.372455	-0.368141	-0.363883	-0.35969	-0.355572	-0.35154	-0.3476	-0.343761	-0.340029	-0.336412	-0.332912	-0.329535	-0.326282	-0.323156	-0.320157	-0.317151	-0.3144	-0.311768	-0.309251	-0.306843	-0.304538	-0.302328	-0.300206	-0.298162	-0.296187	-0.294272	-0.292406	-0.290577	-0.288775	-0.286987	-0.285202
1	sub-18	0	80	-0.0281727	-0.0281724	-0.0290543	-0.0307403	-0.0331437	-0.0361693	-0.0397145	-0.0436704	-0.0479225	-0.052352	-0.0568369	-0.0612528	-0.0654743	-0.0693761	-0.0728344	-0.0757279	-0.0779392	-0.0793561	-0.0798724	-0.0793889	-0.0778139	-0.0750638	-0.0710641	-0.065749	-0.0590627	-0.0509589	-0.0414016	-0.0303653	-0.0178347	-0.00380489	0.0117185	0.0287195	0.0471713	0.0670371	0.0882696	0.110812	0.134598	0.159552	0.185592	0.212627	0.240562	0.269294	0.29872	0.328728	0.359208	0.390042
2	sub-18	1	20	0.0237075	0.0302611	0.0374489	0.0452386	0.0535917	0.0624636	0.0718044	0.0815585	0.0916658	0.102062	0.112677	0.123441	0.134277	0.145107	0.155852	0.16643	0.176759	0.186754	0.196333	0.205413	0.213913	0.221754	0.228859	0.235156	0.240577	0.245058	0.248542	0.250978	0.252324	0.252541	0.251603	0.24949	0.246191	0.241702	0.236029	0.229185	0.221191	0.212079	0.201884	0.190652	0.178433	0.165285	0.151269	0.13645	0.120896	0.104678
3	sub-18	1	80	-0.00744873	-0.008813	-0.0103043	-0.0119178	-0.0136482	-0.0154898	-0.0174366	-0.0194819	-0.0215884	-0.0238106	-0.0261101	-0.0284795	-0.0309111	-0.0333969	-0.0359291	-0.0384994	-0.0410999	-0.0437224	-0.0463588	-0.0490011	-0.0516108	-0.0542418	-0.0568558	-0.0594459	-0.0620051	-0.0645271	-0.0670057	-0.0694349	-0.0718093	-0.0741234	-0.076372	-0.0785502	-0.0806535	-0.0826775	-0.0846183	-0.0864416	-0.088175	-0.0898464	-0.0913607	-0.0928387	-0.0942164	-0.0954914	-0.0966616	-0.0977251	-0.09868	-0.0995246
0	sub-19	0	20	0.0409247	0.0419896	0.0433938	0.0451322	0.0471978	0.0495821	0.0522747	0.0552634	0.0585348	0.0620734	0.0658628	0.0698849	0.0741206	0.0785495	0.0831504	0.0879013	0.0927796	0.0977618	0.102824	0.107943	0.113093	0.11825	0.12339	0.128489	0.133521	0.138464	0.143294	0.147989	0.152527	0.156887	0.16105	0.164997	0.168713	0.17218	0.175387	0.178319	0.180968	0.183324	0.18538	0.187131	0.188574	0.189708	0.190534	0.191052	0.191267	0.191184
1	sub-19	0	80	-0.0736919	-0.0744858	-0.0752469	-0.0759803	-0.0766905	-0.0773812	-0.0780559	-0.0787175	-0.0793684	-0.0800107	-0.080646	-0.0812754	-0.0818999	-0.0825202	-0.0831367	-0.0837498	-0.0843596	-0.0849662	-0.0855695	-0.0861696	-0.0867666	-0.0873605	-0.0879515	-0.0885399	-0.0891262	-0.0897107	-0.090294	-0.0908768	-0.09146	-0.0920443	-0.092631	-0.0932213	-0.0938165	-0.0944182	-0.0950281	-0.0956481	-0.0962803	-0.0969267	-0.0962211	-0.0969074	-0.0976151	-0.0983469	-0.0991052	-0.0998926	-0.100711	-0.101563
2	sub-19	1	20	0.463438	0.456924	0.450065	0.442877	0.435373	0.42757	0.419484	0.411135	0.40254	0.393719	0.384693	0.375481	0.366106	0.356588	0.346952	0.337218	0.327412	0.317555	0.307674	0.297791	0.287932	0.27812	0.268379	0.258735	0.249209	0.239827	0.23061	0.22158	0.21276	0.20417	0.195829	0.187756	0.179971	0.172488	0.165325	0.158495	0.152013	0.14589	0.140139	0.134768	0.129787	0.125202	0.121021	0.117247	0.113884	0.110934
3	sub-19	1	80	-0.231589	-0.231073	-0.230559	-0.229723	-0.229209	-0.228691	-0.228167	-0.227634	-0.227092	-0.226539	-0.225971	-0.225389	-0.224789	-0.224171	-0.223532	-0.222871	-0.221862	-0.22115	-0.22041	-0.219638	-0.218833	-0.217991	-0.21711	-0.216186	-0.215216	-0.214196	-0.213123	-0.211994	-0.210804	-0.209549	-0.208226	-0.20683	-0.205035	-0.203485	-0.201528	-0.19981	-0.198002	-0.196104	-0.194112	-0.192025	-0.189843	-0.187565	-0.185191	-0.18272	-0.180155	-0.177496
0	sub-20	0	20	-0.0401198	-0.03844	-0.0367877	-0.0351692	-0.0335907	-0.0320586	-0.0305796	-0.0291607	-0.027809	-0.026532	-0.0253375	-0.0242336	-0.0232287	-0.022332	-0.0215529	-0.0209012	-0.0203876	-0.0200228	-0.0198182	-0.0197855	-0.0199366	-0.0202837	-0.0208392	-0.0216152	-0.0226237	-0.0238761	-0.0253832	-0.027155	-0.0292	-0.0315255	-0.034137	-0.0370379	-0.0402296	-0.043711	-0.0474785	-0.0515261	-0.0558453	-0.0604251	-0.0652523	-0.0703115	-0.0755851	-0.0810538	-0.0866968	-0.0924915	-0.0984144	-0.104441
1	sub-20	0	80	-0.222555	-0.22116	-0.219474	-0.217497	-0.215231	-0.212676	-0.209838	-0.206719	-0.203323	-0.199658	-0.195727	-0.191538	-0.187098	-0.182415	-0.177497	-0.172354	-0.166997	-0.161438	-0.155691	-0.149772	-0.143698	-0.137488	-0.131165	-0.124752	-0.118274	-0.11176	-0.105238	-0.0987387	-0.0922925	-0.0859312	-0.0796868	-0.0735909	-0.0676747	-0.0619691	-0.0556463	-0.0504538	-0.0455577	-0.0409839	-0.0367556	-0.032894	-0.0294169	-0.0263397	-0.0236742	-0.0214297	-0.0196125	-0.0182261
2	sub-20	1	20	-0.183428	-0.195953	-0.207879	-0.219193	-0.229883	-0.239942	-0.249361	-0.258136	-0.266265	-0.273748	-0.280587	-0.286786	-0.292354	-0.2973	-0.301638	-0.305381	-0.30855	-0.311162	-0.313241	-0.314812	-0.315899	-0.316531	-0.316736	-0.316543	-0.315982	-0.315081	-0.31387	-0.312377	-0.310629	-0.308654	-0.306476	-0.304118	-0.301602	-0.298947	-0.296171	-0.293288	-0.29031	-0.28725	-0.284115	-0.280914	-0.277651	-0.274334	-0.270968	-0.267558	-0.264112	-0.260638
3	sub-20	1	80	-0.0456752	-0.0482299	-0.0507556	-0.0532476	-0.0557017	-0.0581141	-0.0604812	-0.0628001	-0.0649188	-0.0671337	-0.0692929	-0.0713946	-0.0734374	-0.0754203	-0.0773427	-0.0792043	-0.0810051	-0.0827455	-0.0844259	-0.0860471	-0.0876096	-0.0891144	-0.0905621	-0.0918044	-0.093141	-0.094423	-0.0956512	-0.0968268	-0.097951	-0.0990251	-0.100051	-0.101031	-0.101966	-0.10286	-0.103714	-0.104532	-0.105317	-0.106072	-0.106799	-0.107502	-0.108184	-0.108848	-0.109498	-0.110136	-0.110766	-0.111391
0	sub-21	0	20	0.290015	0.292641	0.295421	0.298351	0.301425	0.304633	0.307966	0.311412	0.314958	0.318588	0.322287	0.326037	0.32982	0.333618	0.33741	0.341177	0.344899	0.348557	0.352129	0.355596	0.358939	0.362138	0.365174	0.368028	0.370681	0.373114	0.37531	0.377249	0.378913	0.380284	0.381345	0.382075	0.382459	0.382477	0.382114	0.381351	0.380174	0.378566	0.376514	0.374004	0.371024	0.367564	0.363614	0.359167	0.354217	0.348761
1	sub-21	0	80	-1.04848	-1.03564	-1.02314	-1.01096	-0.999093	-0.987538	-0.976279	-0.965301	-0.954588	-0.944121	-0.933882	-0.923848	-0.913998	-0.904307	-0.894749	-0.8853	-0.875932	-0.866617	-0.857329	-0.84804	-0.838722	-0.829349	-0.819895	-0.810336	-0.800648	-0.790811	-0.780804	-0.770611	-0.760218	-0.749612	-0.738783	-0.727724	-0.716431	-0.7049	-0.693131	-0.681125	-0.668886	-0.656418	-0.643728	-0.630825	-0.617719	-0.604425	-0.590957	-0.577333	-0.563573	-0.549699
2	sub-21	1	20	2.32296	2.2883	2.25361	2.21891	2.18422	2.14957	2.11496	2.08043	2.04599	2.01166	1.97747	1.94342	1.90955	1.87586	1.84239	1.80914	1.77615	1.74343	1.711	1.6789	1.64713	1.61572	1.58471	1.5541	1.52393	1.49421	1.46498	1.43626	1.40806	1.38042	1.35334	1.32685	1.30097	1.2757	1.25107	1.22707	1.20371	1.18101	1.15895	1.13754	1.11677	1.09663	1.07712	1.05822	1.03993	1.02222
3	sub-21	1	80	-0.40055	-0.396741	-0.392881	-0.388973	-0.38502	-0.381024	-0.376989	-0.372917	-0.368812	-0.364678	-0.360518	-0.356337	-0.352138	-0.347927	-0.343709	-0.339489	-0.335275	-0.331073	-0.32689	-0.322734	-0.318614	-0.314539	-0.310518	-0.30656	-0.302675	-0.298872	-0.295161	-0.291551	-0.28805	-0.284668	-0.281412	-0.27829	-0.275308	-0.272471	-0.269785	-0.267254	-0.26488	-0.262665	-0.260611	-0.258717	-0.256983	-0.255405	-0.253981	-0.252708	-0.251579	-0.25059
0	sub-23	0	20	0.308581	0.305927	0.303271	0.300606	0.297926	0.295223	0.292491	0.289721	0.286906	0.284039	0.281111	0.278113	0.275038	0.271879	0.268625	0.26527	0.261805	0.258223	0.254515	0.250673	0.246689	0.242555	0.238265	0.23381	0.229184	0.224381	0.219396	0.214222	0.208858	0.203299	0.197543	0.191591	0.185441	0.179096	0.172558	0.165831	0.158921	0.151834	0.144579	0.137166	0.129606	0.121911	0.114095	0.106173	0.0981614	0.0900767
1	sub-23	0	80	-0.168251	-0.1687	-0.169039	-0.169283	-0.169446	-0.169547	-0.169602	-0.169631	-0.169653	-0.169689	-0.169758	-0.169882	-0.17008	-0.170375	-0.170785	-0.17133	-0.17203	-0.172902	-0.173265	-0.174536	-0.176027	-0.177751	-0.17972	-0.181944	-0.18443	-0.187184	-0.19021	-0.19351	-0.197083	-0.200925	-0.205033	-0.209397	-0.21401	-0.218858	-0.223929	-0.229205	-0.234669	-0.240301	-0.246079	-0.251979	-0.257976	-0.264044	-0.270155	-0.276281	-0.282395	-0.288467
2	sub-23	1	20	0.632149	0.625006	0.617477	0.609583	0.601346	0.592793	0.583948	0.574841	0.5655	0.555957	0.546243	0.536389	0.52643	0.516397	0.506322	0.496237	0.486173	0.47616	0.466225	0.456396	0.446699	0.437156	0.427791	0.418625	0.409676	0.400962	0.392498	0.384298	0.376373	0.368733	0.361385	0.354336	0.347587	0.341142	0.335	0.329157	0.323609	0.31835	0.313372	0.308664	0.304216	0.300014	0.296046	0.292296	0.288751	0.285395
3	sub-23	1	80	0.117879	0.117001	0.116107	0.115181	0.114207	0.11317	0.112054	0.110843	0.109523	0.108081	0.106501	0.104773	0.102882	0.10082	0.0985748	0.0961384	0.0935029	0.0906618	0.0876098	0.0843432	0.0808595	0.0771576	0.073436	0.0693	0.0649517	0.0603963	0.0556402	0.0506916	0.0455599	0.0402561	0.0347926	0.029183	0.023442	0.0175854	0.0116303	0.00559409	-0.00050465	-0.00664693	-0.0128133	-0.0189839	-0.0251387	-0.031258	-0.0373218	-0.0433106	-0.0492056	-0.0549883
0	sub-24	0	20	-1.06351	-1.05837	-1.05124	-1.0422	-1.03129	-1.01858	-1.00414	-0.988044	-0.970369	-0.951195	-0.930603	-0.908678	-0.885507	-0.861177	-0.835776	-0.809395	-0.782121	-0.754041	-0.72524	-0.695801	-0.665805	-0.635331	-0.604452	-0.573241	-0.541765	-0.510091	-0.478281	-0.446394	-0.414486	-0.382609	-0.350815	-0.31915	-0.287659	-0.256384	-0.225366	-0.194641	-0.164246	-0.134215	-0.10458	-0.0753723	-0.0466214	-0.0183558	0.0093968	0.0366103	0.0632599	0.0893225
1	sub-24	0	80	-0.130184	-0.128576	-0.12679	-0.12482	-0.122662	-0.120314	-0.11777	-0.115028	-0.112084	-0.108936	-0.105579	-0.101878	-0.0980971	-0.0941001	-0.0898847	-0.085449	-0.0807917	-0.0759121	-0.0708104	-0.0654876	-0.0599454	-0.0541866	-0.0482149	-0.0420349	-0.0356519	-0.0290725	-0.0223038	-0.0153542	-0.00823261	-0.000949187	0.006485	0.0140578	0.0217556	0.0295639	0.0374664	0.0454457	0.0534827	0.0615573	0.0696476	0.0777311	0.0857837	0.0937809	0.101697	0.109507	0.117183	0.124701
2	sub-24	1	20	-0.179362	-0.18266	-0.185511	-0.187892	-0.189781	-0.191158	-0.192003	-0.192299	-0.192033	-0.191192	-0.189764	-0.187744	-0.185126	-0.181908	-0.178091	-0.17368	-0.168679	-0.163097	-0.156945	-0.150234	-0.14298	-0.135198	-0.126907	-0.118127	-0.10888	-0.0991901	-0.0890821	-0.0785833	-0.0677218	-0.0565274	-0.0450307	-0.0332637	-0.0212593	-0.00905118	0.00332656	0.0158394	0.0284531	0.0411335	0.0543686	0.0670813	0.0797632	0.0923834	0.104912	0.117321	0.129583	0.141672
3	sub-24	1	80	0.208725	0.211878	0.21483	0.217583	0.220138	0.222499	0.224672	0.226662	0.22848	0.230134	0.231635	0.232998	0.234235	0.235362	0.236394	0.237349	0.238245	0.239099	0.23993	0.240757	0.241598	0.242473	0.243398	0.244393	0.245474	0.24666	0.247967	0.24941	0.251003	0.252758	0.254686	0.256796	0.259093	0.261584	0.264271	0.267154	0.270233	0.273505	0.276964	0.280605	0.284419	0.288395	0.292524	0.296791	0.301182	0.305685
0	sub-25	0	20	-0.676375	-0.670699	-0.665019	-0.659347	-0.653694	-0.648071	-0.642491	-0.636962	-0.631497	-0.626103	-0.620789	-0.615561	-0.610425	-0.605385	-0.600444	-0.595602	-0.590859	-0.586212	-0.581657	-0.577189	-0.572799	-0.56848	-0.56422	-0.560006	-0.555827	-0.551668	-0.547512	-0.543344	-0.539146	-0.534901	-0.530589	-0.526191	-0.521688	-0.517059	-0.512285	-0.507344	-0.502217	-0.496885	-0.491328	-0.48553	-0.479475	-0.473148	-0.466538	-0.459634	-0.452429	-0.444921
1	sub-25	0	80	0.0356773	0.0344282	0.0332591	0.0321773	0.0311897	0.0303026	0.0295214	0.0288507	0.0282941	0.03017	0.0298408	0.0296303	0.0295378	0.029562	0.0297004	0.0299499	0.0303065	0.0307654	0.0313213	0.0319678	0.0326983	0.0335053	0.034381	0.0353168	0.0363039	0.0373332	0.0383952	0.0394802	0.0405785	0.0416807	0.0427773	0.0438593	0.0449181	0.0459455	0.0469341	0.0478772	0.0487688	0.049604	0.0503787	0.0510897	0.0517348	0.0523126	0.0528227	0.0532652	0.0536413	0.0539525
2	sub-25	1	20	-0.634982	-0.629483	-0.623888	-0.618206	-0.612449	-0.606625	-0.600744	-0.594817	-0.588854	-0.582864	-0.576857	-0.570844	-0.564835	-0.558838	-0.552865	-0.546926	-0.541029	-0.535186	-0.529407	-0.523702	-0.518082	-0.512556	-0.507137	-0.501833	-0.496657	-0.491619	-0.486731	-0.482003	-0.477447	-0.473074	-0.468896	-0.464922	-0.461164	-0.45763	-0.454328	-0.451266	-0.44845	-0.445884	-0.443572	-0.441514	-0.439711	-0.438162	-0.436864	-0.435813	-0.435004	-0.434431
3	sub-25	1	80	-0.23088	-0.230293	-0.229623	-0.228864	-0.228012	-0.227063	-0.226016	-0.224866	-0.223615	-0.222262	-0.220806	-0.219249	-0.217594	-0.21584	-0.213992	-0.212051	-0.21002	-0.207903	-0.205702	-0.203421	-0.201061	-0.198626	-0.196119	-0.193542	-0.190896	-0.188185	-0.185409	-0.182569	-0.179667	-0.176705	-0.173683	-0.170603	-0.167465	-0.164272	-0.161026	-0.157727	-0.154379	-0.150984	-0.147546	-0.144067	-0.140552	-0.137005	-0.133431	-0.129833	-0.126219	-0.122593
0	sub-26	0	20	0.340806	0.337838	0.334913	0.332027	0.329177	0.326356	0.32356	0.320779	0.318007	0.315234	0.31245	0.309644	0.306805	0.303922	0.300983	0.297977	0.29489	0.291711	0.292185	0.288776	0.285242	0.281573	0.277762	0.273798	0.269677	0.265393	0.260941	0.256318	0.251524	0.246559	0.241424	0.236122	0.23066	0.225043	0.219278	0.213376	0.207346	0.201201	0.194951	0.188612	0.182197	0.175721	0.169199	0.162646	0.156079	0.149513
1	sub-26	0	80	-0.131508	-0.130505	-0.129525	-0.128574	-0.127653	-0.126766	-0.125913	-0.125095	-0.124312	-0.123564	-0.122847	-0.122161	-0.121503	-0.12087	-0.120259	-0.119666	-0.119088	-0.11852	-0.117958	-0.117397	-0.116831	-0.116257	-0.115668	-0.115058	-0.114423	-0.113758	-0.113055	-0.112312	-0.111522	-0.110681	-0.109784	-0.108829	-0.10781	-0.106726	-0.105574	-0.104352	-0.103058	-0.101692	-0.100254	-0.0987425	-0.0971584	-0.095502	-0.0937741	-0.0919755	-0.0901071	-0.0881701
2	sub-26	1	20	-0.0975222	-0.101836	-0.105753	-0.109274	-0.112401	-0.115135	-0.117484	-0.119453	-0.121052	-0.122293	-0.12319	-0.123761	-0.124025	-0.124005	-0.123724	-0.123212	-0.122495	-0.121607	-0.12058	-0.119449	-0.118247	-0.117012	-0.115779	-0.114585	-0.113463	-0.11245	-0.111577	-0.110878	-0.110381	-0.110115	-0.110107	-0.110379	-0.110953	-0.111848	-0.113081	-0.114666	-0.116613	-0.118932	-0.121627	-0.124703	-0.12816	-0.131995	-0.136204	-0.14078	-0.145713	-0.150989
3	sub-26	1	80	0.255989	0.252831	0.250581	0.247428	0.244275	0.241119	0.237958	0.234788	0.23251	0.229309	0.226089	0.222848	0.21958	0.216284	0.212956	0.209593	0.206193	0.202755	0.199275	0.195753	0.192187	0.188578	0.184925	0.181228	0.177489	0.173709	0.169891	0.166038	0.162153	0.158241	0.154305	0.150351	0.146385	0.142412	0.13844	0.135378	0.131424	0.127491	0.123587	0.11972	0.115897	0.112127	0.108416	0.104774	0.101206	0.0977216
0	sub-27	0	20	-0.236712	-0.235611	-0.234255	-0.232639	-0.230759	-0.228613	-0.226198	-0.223516	-0.220569	-0.217359	-0.21389	-0.210169	-0.206201	-0.201993	-0.197555	-0.192894	-0.18802	-0.182944	-0.177676	-0.172227	-0.166609	-0.160833	-0.154909	-0.148849	-0.142663	-0.13636	-0.129951	-0.123444	-0.116845	-0.110163	-0.103402	-0.0965699	-0.0896699	-0.0827065	-0.0756835	-0.0686042	-0.0614715	-0.0542884	-0.0470575	-0.0397815	-0.0324628	-0.0251043	-0.0177088	-0.0102795	-0.00281991	0.00466588
1	sub-27	0	80	0.382659	0.381927	0.380788	0.379253	0.377338	0.37506	0.372436	0.369488	0.366239	0.362713	0.358938	0.354941	0.350752	0.346403	0.341925	0.33735	0.332711	0.32804	0.32337	0.31873	0.314152	0.309662	0.305288	0.301055	0.296983	0.293093	0.289402	0.285922	0.282666	0.279641	0.276851	0.274299	0.271983	0.269897	0.268036	0.266387	0.264939	0.263676	0.262579	0.261629	0.260804	0.260079	0.259427	0.258826	0.258246	0.257657
2	sub-27	1	20	-0.242828	-0.218606	-0.192162	-0.163581	-0.13296	-0.100408	-0.0660416	-0.0299857	0.00762535	0.0466497	0.0869388	0.128337	0.170685	0.213817	0.257564	0.301756	0.34622	0.390784	0.435275	0.479523	0.523361	0.566625	0.609153	0.650791	0.691387	0.730799	0.76889	0.805531	0.8406	0.873987	0.905587	0.935307	0.963061	0.988776	1.01239	1.03383	1.05307	1.07007	1.08479	1.09723	1.10737	1.11521	1.12077	1.12407	1.12514	1.12401
3	sub-27	1	80	0.0506078	0.049397	0.0481594	0.0468947	0.0456025	0.0442826	0.0429349	0.0415596	0.0401573	0.0387286	0.0372744	0.0357961	0.0342951	0.0327731	0.0312323	0.0296746	0.0281025	0.0265185	0.024925	0.0233247	0.0217202	0.0201143	0.0185097	0.0169091	0.0153152	0.013731	0.0121595	0.0106035	0.00906634	0.00755111	0.00606111	0.00459966	0.00317008	0.00177565	0.000419414	-0.000895199	-0.00216546	-0.00338869	-0.00456249	-0.00568479	-0.0067539	-0.00776858	-0.00872806	-0.00963205	-0.0104808	-0.0112749
0	sub-31	0	20	-0.63581	-0.626473	-0.61732	-0.608329	-0.599481	-0.590755	-0.58213	-0.573587	-0.565106	-0.556667	-0.548254	-0.539849	-0.531437	-0.523002	-0.514533	-0.506016	-0.497441	-0.488799	-0.480081	-0.47128	-0.462391	-0.453409	-0.444331	-0.435156	-0.425882	-0.41651	-0.407042	-0.397479	-0.387825	-0.378085	-0.368264	-0.35837	-0.348407	-0.338386	-0.328314	-0.318199	-0.308052	-0.29788	-0.287693	-0.2775	-0.267308	-0.257127	-0.246962	-0.236821	-0.226708	-0.21663
1	sub-31	0	80	-0.736484	-0.733152	-0.729879	-0.726682	-0.72358	-0.720592	-0.717736	-0.715028	-0.712484	-0.710117	-0.707939	-0.705962	-0.704194	-0.702639	-0.701302	-0.700183	-0.699282	-0.698593	-0.698111	-0.697824	-0.697721	-0.697787	-0.698004	-0.698353	-0.698809	-0.69935	-0.699948	-0.700574	-0.701199	-0.701791	-0.702318	-0.702746	-0.703043	-0.703174	-0.703105	-0.702804	-0.702237	-0.701372	-0.700178	-0.698625	-0.696685	-0.694332	-0.691542	-0.688293	-0.684565	-0.680343
2	sub-31	1	20	-0.339273	-0.353581	-0.367884	-0.382151	-0.396345	-0.410428	-0.42436	-0.438099	-0.4516	-0.464816	-0.477699	-0.4902	-0.502269	-0.513858	-0.524917	-0.535398	-0.545255	-0.554442	-0.562917	-0.57064	-0.577571	-0.583676	-0.588922	-0.59328	-0.596722	-0.599227	-0.600773	-0.601344	-0.600926	-0.599507	-0.597081	-0.593643	-0.58919	-0.583724	-0.57725	-0.569774	-0.561307	-0.551861	-0.541452	-0.530099	-0.517824	-0.504654	-0.490619	-0.475752	-0.460093	-0.443686
3	sub-31	1	80	-0.364215	-0.360892	-0.357479	-0.353976	-0.35038	-0.346691	-0.342909	-0.339032	-0.335062	-0.330999	-0.326845	-0.3226	-0.318268	-0.313849	-0.309347	-0.304764	-0.300105	-0.295374	-0.290576	-0.285716	-0.280799	-0.275834	-0.270826	-0.265783	-0.260714	-0.255626	-0.250527	-0.245427	-0.240335	-0.235259	-0.230207	-0.22519	-0.220216	-0.215294	-0.210431	-0.205637	-0.200918	-0.196284	-0.19174	-0.187294	-0.182951	-0.178719	-0.174601	-0.170605	-0.166733	-0.162991
0	sub-32	0	20	-1.37317	-1.35986	-1.34632	-1.33258	-1.31866	-1.30461	-1.29046	-1.27624	-1.26201	-1.24778	-1.2336	-1.21952	-1.20555	-1.19173	-1.17811	-1.16469	-1.15153	-1.13863	-1.12602	-1.11373	-1.10177	-1.09016	-1.0789	-1.06801	-1.05749	-1.04734	-1.03756	-1.02815	-1.0191	-1.01039	-1.00203	-0.993983	-0.986247	-0.974387	-0.967229	-0.960325	-0.953652	-0.947191	-0.94092	-0.934819	-0.928865	-0.918622	-0.912916	-0.907295	-0.90174	-0.896231
1	sub-32	0	80	-0.562417	-0.574178	-0.585251	-0.5956	-0.605193	-0.613996	-0.62198	-0.629113	-0.635368	-0.640717	-0.645138	-0.648609	-0.651111	-0.652629	-0.65315	-0.652665	-0.651168	-0.648656	-0.645132	-0.6406	-0.63507	-0.628554	-0.621071	-0.612642	-0.603292	-0.593051	-0.581954	-0.570036	-0.55734	-0.54391	-0.529792	-0.515036	-0.499695	-0.483822	-0.467474	-0.450707	-0.433579	-0.41615	-0.39848	-0.380632	-0.362665	-0.344643	-0.326628	-0.308681	-0.290865	-0.273239
2	sub-32	1	20	6.49159	6.45432	6.41703	6.37973	6.34239	6.30502	6.26761	6.23016	6.19266	6.15509	6.11747	6.07978	6.04201	6.00417	5.96624	5.92823	5.89012	5.85191	5.8136	5.77518	5.73665	5.698	5.65924	5.62035	5.58134	5.54219	5.50291	5.4635	5.42394	5.38424	5.3444	5.30441	5.26428	5.22399	5.18355	5.14295	5.1022	5.0613	5.02024	4.97903	4.93766	4.89613	4.85446	4.81263	4.77066	4.72854
3	sub-32	1	80	-0.200722	-0.207132	-0.21374	-0.22053	-0.227484	-0.234586	-0.241817	-0.249159	-0.25659	-0.264092	-0.271642	-0.27922	-0.285542	-0.293113	-0.300642	-0.308107	-0.315484	-0.321486	-0.328614	-0.335578	-0.342351	-0.348906	-0.355218	-0.361259	-0.367004	-0.371166	-0.376248	-0.380959	-0.385278	-0.389184	-0.391396	-0.394424	-0.396986	-0.399069	-0.400661	-0.401752	-0.402333	-0.402399	-0.401946	-0.400971	-0.399476	-0.397462	-0.394935	-0.3919	-0.388368	-0.384349
0	sub-33	0	20	0.211756	0.217173	0.222416	0.227462	0.232286	0.236863	0.241168	0.245172	0.248851	0.252175	0.255119	0.257653	0.259751	0.261385	0.262531	0.263163	0.263258	0.262796	0.261757	0.260123	0.257881	0.255015	0.251517	0.247375	0.242585	0.237142	0.231043	0.224289	0.216882	0.20883	0.20014	0.190825	0.180898	0.170377	0.159282	0.147636	0.135466	0.122798	0.109665	0.0961011	0.0821418	0.0678267	0.0531973	0.0382972	0.0231722	0.0078698
1	sub-33	0	80	-0.148478	-0.177824	-0.206292	-0.233861	-0.260512	-0.286234	-0.311016	-0.334854	-0.357744	-0.37969	-0.400695	-0.42077	-0.439924	-0.458173	-0.475535	-0.492029	-0.507678	-0.522507	-0.536543	-0.549817	-0.56236	-0.574206	-0.585392	-0.595954	-0.605934	-0.615372	-0.624309	-0.632789	-0.640855	-0.648552	-0.655921	-0.663006	-0.66985	-0.676493	-0.682973	-0.689329	-0.695596	-0.701805	-0.707989	-0.714176	-0.717802	-0.724086	-0.73045	-0.736916	-0.743507	-0.75024
2	sub-33	1	20	-0.217996	-0.218389	-0.219168	-0.220298	-0.221742	-0.223464	-0.225428	-0.227599	-0.229941	-0.232419	-0.234996	-0.237633	-0.240293	-0.242934	-0.245517	-0.247996	-0.250327	-0.252463	-0.254354	-0.25595	-0.257198	-0.258042	-0.258428	-0.258301	-0.257605	-0.256288	-0.254296	-0.251582	-0.248099	-0.243805	-0.238661	-0.232633	-0.225692	-0.217815	-0.208984	-0.199188	-0.188421	-0.176685	-0.163987	-0.150343	-0.135775	-0.120309	-0.10398	-0.0868309	-0.0689077	-0.0502647
3	sub-33	1	80	-0.0860075	-0.0877438	-0.0890387	-0.0898925	-0.0903071	-0.0902864	-0.089836	-0.0889634	-0.0876786	-0.0859933	-0.0839217	-0.0814803	-0.0786881	-0.0755662	-0.0721382	-0.0684297	-0.0644682	-0.0602832	-0.0559054	-0.0513672	-0.0467019	-0.0419437	-0.0371277	-0.0322894	-0.0274644	-0.0226886	-0.0179977	-0.0134268	-0.00901068	-0.00478279	-0.000775657	0.00297952	0.00645299	0.00961661	0.0124439	0.0149101	0.0169923	0.018669	0.0199209	0.02073	0.0210805	0.0209582	0.0203507	0.0192476	0.0176405	0.015523
[truncated: 1,704 more columns]

## Sheet: panel A nuisance
	subject	correct	frequency	0	1	2	3	4	5	6	7	8	9	10	11	12	13	14	15	16	17	18	19	20	21	22	23	24	25	26	27	28	29	30	31	32	33	34	35	36	37	38	39	40	41	42	43	44	45
0	sub-1	0	20	19.3013	19.1874	19.073	18.9583	18.8431	18.7275	18.6115	18.495	18.3781	18.2608	18.143	18.0247	17.906	17.7868	17.6672	17.547	17.4264	17.3053	17.1837	17.0616	16.9391	16.816	16.6924	16.5683	16.4437	16.3185	16.1929	16.0667	15.94	15.8128	15.685	15.5567	15.4278	15.2984	15.1685	15.038	14.907	14.7754	14.6432	14.5105	14.3772	14.2434	14.109	13.974	13.8384	13.7023
1	sub-1	0	80	-19.0048	-18.756	-18.5071	-18.2583	-18.0096	-17.761	-17.5126	-17.2643	-17.0162	-16.7683	-16.5206	-16.2732	-16.0261	-15.7792	-15.5328	-15.2866	-15.0409	-14.7955	-14.5506	-14.3061	-14.0621	-13.8186	-13.5757	-13.3333	-13.0914	-12.8502	-12.6095	-12.3695	-12.1302	-11.8916	-11.6537	-11.4165	-11.1801	-10.9444	-10.2069	-9.97372	-9.7414	-9.50996	-9.27942	-9.04979	-8.8211	-8.59338	-8.36664	-8.14091	-7.91621	-7.69256
2	sub-1	1	20	15.6583	15.6337	15.6076	15.5802	15.5514	15.5211	15.4895	15.4566	15.4222	15.3864	15.3492	15.3106	15.2706	15.2292	15.1864	15.1422	15.0966	15.0496	15.0012	14.9513	14.9001	14.8474	14.7934	14.7379	14.681	14.6227	14.563	14.5018	14.4393	14.3753	14.31	14.2432	14.175	14.1054	14.0344	13.962	13.8882	13.813	13.7364	13.6584	13.579	13.4982	13.416	13.3325	13.2475	13.1611
3	sub-1	1	80	24.9447	24.6829	24.4218	24.1616	23.9021	23.6434	23.3855	23.1283	22.8719	22.6163	22.3615	22.1075	21.8542	21.6017	21.35	21.0991	20.8489	20.5995	20.3509	20.1031	19.856	19.6097	19.3642	19.1195	18.8755	18.6323	18.3899	18.1483	17.9074	17.6673	17.4279	17.1893	16.9515	16.7145	16.4782	16.2427	16.0079	15.7739	15.6564	15.4237	15.1918	14.9607	14.7303	14.5007	14.2718	14.0437
0	sub-4	0	20	2.33456	2.28938	2.24491	2.20113	2.15804	2.11564	2.07393	2.03289	1.99252	1.95282	1.91378	1.87539	1.83766	1.80056	1.76411	1.72829	1.6931	1.65854	1.62459	1.59125	1.55851	1.52638	1.49484	1.46389	1.43352	1.40373	1.37451	1.34586	1.31776	1.29022	1.26323	1.23678	1.21087	1.18548	1.16062	1.13628	1.11245	1.08913	1.06631	1.04398	1.02214	1.00078	0.979901	0.95949	0.939542	0.920051
1	sub-4	0	80	18.6931	18.5017	18.3103	18.1191	17.9279	17.7369	17.5459	17.3551	17.1644	16.9738	16.7833	16.593	16.4029	16.2129	16.023	15.8333	15.6438	15.4545	15.2653	15.0764	14.8876	14.6991	14.5108	14.3226	14.1348	13.9471	13.7597	13.5726	13.3857	13.1991	13.0128	12.8267	12.6409	12.4554	12.2703	12.0854	11.9008	11.7166	11.5327	11.3492	11.166	10.9832	10.8007	10.6186	10.4369	10.2555
2	sub-4	1	20	-8.57197	-8.49298	-8.41381	-8.33447	-8.25496	-8.17528	-8.09544	-8.01543	-7.93527	-7.85496	-7.77449	-7.69388	-7.61312	-7.53222	-7.45119	-7.37002	-7.28872	-7.20729	-7.12574	-7.04408	-6.96229	-6.8804	-6.7984	-6.71629	-6.63409	-6.55179	-6.46939	-6.38691	-6.30435	-6.22171	-6.13899	-6.0562	-5.97335	-5.89043	-5.80745	-5.72443	-5.64135	-5.55824	-5.47508	-5.39189	-5.30867	-5.22543	-5.14216	-5.05889	-4.9756	-4.89231
3	sub-4	1	80	-0.372522	-0.407643	-0.441993	-0.475575	-0.508396	-0.540459	-0.57177	-0.602334	-0.632155	-0.661239	-0.68959	-0.717214	-0.744115	-0.770299	-0.79577	-0.820534	-0.844596	-0.86796	-0.890633	-0.912618	-0.933921	-0.954548	-0.974503	-0.993792	-1.01242	-1.03039	-1.04771	-1.06439	-1.08042	-1.09582	-1.11059	-1.12473	-1.13826	-1.15117	-1.16347	-1.17517	-1.18626	-1.19677	-1.20669	-1.21602	-1.22478	-1.23297	-1.24059	-1.24764	-1.25414	-1.26009
0	sub-5	0	20	-24.1227	-24.1187	-24.1118	-24.1019	-24.0891	-24.199	-24.1796	-24.1573	-24.132	-24.1039	-24.0729	-24.039	-24.0022	-23.9626	-23.9201	-23.8747	-23.8266	-23.7755	-23.7217	-23.665	-23.6056	-23.5433	-23.4783	-23.4105	-23.3399	-23.2666	-23.1906	-23.1118	-23.0302	-22.946	-22.8591	-22.7695	-22.6772	-22.5822	-22.4846	-22.3843	-22.2814	-22.1759	-22.0678	-21.957	-21.8437	-21.7278	-21.6094	-21.4884	-21.3649	-21.2388
1	sub-5	0	80	-179.087	-177.729	-176.365	-174.996	-173.623	-172.244	-170.861	-169.474	-168.081	-166.685	-165.284	-163.879	-162.47	-161.057	-159.64	-158.219	-156.794	-155.366	-153.934	-152.499	-151.06	-149.618	-148.173	-146.725	-145.273	-143.819	-142.362	-140.902	-139.44	-137.975	-136.507	-135.037	-133.565	-132.09	-130.613	-129.134	-127.653	-126.17	-124.686	-123.199	-121.711	-120.221	-118.729	-117.236	-115.742	-114.246
2	sub-5	1	20	-251.43	-249.623	-247.804	-245.973	-244.13	-242.276	-240.411	-238.534	-236.646	-234.747	-232.838	-230.918	-228.987	-227.046	-225.095	-223.134	-221.163	-219.183	-217.193	-215.194	-213.185	-211.168	-209.141	-207.106	-205.062	-203.01	-200.95	-198.882	-196.805	-194.721	-192.629	-190.53	-188.424	-186.31	-184.189	-182.062	-179.928	-177.787	-175.64	-173.487	-171.327	-169.162	-166.991	-164.815	-162.633	-160.445
3	sub-5	1	80	-13.5707	-13.7569	-13.9074	-14.0552	-14.2002	-14.3423	-14.4816	-14.6181	-14.7517	-14.8825	-15.0104	-15.1354	-15.2576	-15.4421	-15.5581	-15.6713	-15.7815	-15.8888	-16.0259	-16.1272	-16.2256	-16.3211	-16.4136	-16.5032	-16.5899	-16.7061	-16.7867	-16.8642	-16.9388	-17.0105	-17.0791	-17.1447	-17.2073	-17.267	-17.3236	-17.3772	-17.4277	-17.5079	-17.5522	-17.5934	-17.6317	-17.6668	-17.6989	-17.728	-17.7539	-17.7768
0	sub-7	0	20	-30.9349	-30.7507	-30.5655	-30.379	-30.1915	-30.0028	-29.8129	-29.6219	-29.4296	-29.2362	-29.0416	-28.8458	-28.6488	-28.4506	-28.2511	-28.0504	-27.8485	-27.6453	-27.4409	-27.2353	-27.0283	-26.8202	-26.6107	-26.4	-26.188	-25.9747	-25.7602	-25.5444	-25.3273	-25.1089	-24.8892	-24.6683	-24.4461	-24.2225	-23.9977	-23.7716	-23.5443	-23.3156	-23.0857	-22.8545	-22.622	-22.3882	-22.1532	-21.9169	-21.6794	-21.4406
1	sub-7	0	80	-51.1305	-50.6858	-50.2405	-49.7945	-49.3477	-48.9004	-48.4523	-48.0036	-47.5542	-47.1042	-46.6535	-46.2022	-45.7503	-45.2977	-44.8445	-44.3906	-43.9362	-43.4811	-43.0255	-42.5692	-42.1124	-41.655	-41.197	-40.7385	-40.2794	-39.8197	-39.3595	-38.8988	-38.4376	-37.9758	-37.5135	-37.0508	-36.5875	-36.1238	-35.6596	-35.1949	-34.7298	-34.2643	-33.7983	-33.3319	-32.8651	-32.3979	-31.9303	-31.4624	-30.9941	-30.5254
2	sub-7	1	20	31.8775	31.5612	31.2406	30.9158	30.5867	30.2536	29.9164	29.5754	29.2305	28.8819	28.5296	28.1738	27.8145	27.4518	27.0859	26.7167	26.3445	25.9692	25.5911	25.2101	24.8264	24.4401	24.0513	23.66	23.2664	22.8706	22.4727	22.0727	21.6707	21.2669	20.8614	20.4542	20.0455	19.6354	19.2239	18.8111	18.3972	17.9822	17.5663	17.1496	16.7321	16.3139	15.8952	15.476	15.0565	14.6367
3	sub-7	1	80	-18.6699	-18.4151	-18.1606	-17.9062	-17.6521	-17.3983	-17.1447	-16.8914	-16.6385	-16.3858	-16.1335	-15.8816	-15.63	-15.3788	-15.128	-14.8776	-14.6276	-14.378	-14.1289	-13.8802	-13.632	-13.3842	-13.137	-12.8902	-12.6439	-12.3981	-12.1528	-11.908	-11.6638	-11.42	-11.1769	-10.9342	-10.6921	-10.4505	-10.2094	-9.96896	-9.72902	-9.48963	-9.2508	-9.01252	-8.77479	-8.53761	-8.30099	-8.06492	-7.8294	-7.59442
0	sub-9	0	20	36.5499	36.209	35.8682	35.5274	35.1868	34.8462	34.5057	34.1653	33.8251	33.485	33.145	32.8052	32.4655	32.1259	31.7866	31.4474	31.1084	30.7696	30.4311	30.0927	29.7546	29.4167	29.079	28.7416	28.4044	28.0675	27.7309	27.3946	27.0586	26.7228	26.3874	26.0523	25.7176	25.3832	25.0491	24.7154	24.3821	24.0491	23.7165	23.3843	23.0525	22.7212	22.3902	22.0597	21.7296	21.4
1	sub-9	0	80	18.842	18.6834	18.5247	18.3659	18.2069	18.0477	17.8885	17.7291	17.5696	17.41	17.2503	17.0905	16.9306	16.7706	16.6106	16.4504	16.2902	16.1299	15.9695	15.8091	15.6486	15.488	15.3274	15.1668	15.0061	14.8454	14.6847	14.5239	14.3632	14.2024	14.0416	13.8807	13.7199	13.5591	13.3983	13.2375	13.0767	12.916	12.7552	12.5945	12.4338	12.2732	12.1126	11.9521	11.7916	11.6311
2	sub-9	1	20	52.7474	52.5311	52.3097	52.0832	51.8516	51.6151	51.3736	51.1271	50.8758	50.6196	50.3585	50.0927	49.8221	49.5468	49.2668	48.9822	48.693	48.3992	48.1009	47.7981	47.4908	47.1792	46.8631	46.5428	46.2181	45.8893	45.5562	45.219	44.8776	44.5322	44.1827	43.8293	43.4719	43.1106	42.7454	42.3765	42.0037	41.6273	41.2471	40.8634	40.476	40.0851	39.6907	39.2928	38.8915	38.4868
3	sub-9	1	80	17.0443	16.8847	16.7254	16.5662	16.4072	16.2484	16.0899	15.9315	15.7734	15.6155	15.4578	15.3003	15.1431	14.9861	14.8293	14.6728	14.5165	14.3604	14.2046	14.049	13.8937	13.7386	13.5838	13.4292	13.2749	13.1208	12.967	12.8135	12.6602	12.5072	12.3544	12.202	12.0498	11.8978	11.7462	11.5948	11.4437	11.2929	11.1423	10.9921	10.8421	10.6924	10.543	10.3939	10.2451	10.0966
0	sub-10	0	20	-141.55	-142.772	-143.952	-145.092	-146.191	-147.25	-148.268	-149.246	-150.185	-151.083	-151.942	-152.762	-153.543	-154.285	-154.988	-155.652	-156.279	-156.867	-157.417	-157.929	-158.404	-158.842	-159.242	-159.606	-159.932	-160.223	-160.477	-160.695	-160.876	-161.023	-161.133	-161.209	-161.249	-161.254	-161.225	-161.161	-161.063	-160.931	-160.765	-160.565	-160.332	-160.066	-159.766	-159.434	-159.069	-158.671
1	sub-10	0	80	244.708	240.575	236.448	232.328	228.215	224.109	220.011	215.92	211.837	207.763	203.697	199.64	195.592	191.554	187.526	183.508	179.501	175.505	171.521	167.549	163.589	159.642	155.708	151.788	147.882	143.991	140.115	136.255	132.411	128.583	124.773	120.98	117.205	113.449	109.712	105.995	102.298	98.6211	94.9657	91.3321	87.7207	84.1321	80.5667	77.0252	73.5079	70.0155
2	sub-10	1	20	1157.87	1157.94	1157.83	1157.53	1157.05	1156.39	1155.55	1154.52	1153.32	1151.93	1150.37	1148.62	1146.69	1144.59	1142.31	1139.85	1137.22	1134.4	1131.42	1128.26	1124.92	1121.42	1117.74	1113.89	1109.87	1105.69	1101.33	1096.81	1092.12	1087.27	1082.25	1077.07	1071.73	1066.22	1060.56	1054.74	1048.77	1042.63	1036.35	1029.91	1023.32	1016.57	1009.68	1002.64	995.453	988.121
3	sub-10	1	80	343.209	339.462	335.729	332.013	328.311	324.624	320.953	317.297	313.655	310.028	306.416	302.819	299.236	295.667	292.113	288.573	285.047	281.535	278.038	274.554	271.083	267.627	264.184	260.754	257.338	253.935	250.546	247.169	243.805	240.455	237.117	233.792	230.479	227.179	223.892	220.617	217.354	214.103	210.864	207.637	204.422	201.219	198.028	194.848	191.68	188.523
0	sub-11	0	20	-6.34167	-6.29264	-6.24341	-6.19398	-6.14436	-6.09454	-6.04453	-5.99432	-5.94391	-5.89331	-5.84251	-5.79151	-5.74031	-5.68892	-5.63733	-5.58555	-5.53356	-5.48138	-5.42901	-5.37643	-5.32366	-5.2707	-5.21753	-5.16418	-5.11062	-5.05687	-5.00293	-4.94879	-4.89445	-4.83992	-4.7852	-4.73028	-4.67517	-4.61987	-4.56437	-4.50868	-4.4528	-4.39673	-4.34047	-4.28402	-4.22737	-4.17054	-4.11352	-4.05631	-3.99891	-3.94133
1	sub-11	0	80	-5.75653	-5.71871	-5.68079	-5.64275	-5.60459	-5.56633	-5.52795	-5.48945	-5.45085	-5.41213	-5.3733	-5.33436	-5.2953	-5.25613	-5.21685	-5.17746	-5.13796	-5.09834	-5.05861	-5.01877	-4.97882	-4.93875	-4.89857	-4.85829	-4.81789	-4.77737	-4.73675	-4.69602	-4.65517	-4.61422	-4.57315	-4.53197	-4.49068	-4.44928	-4.40778	-4.36616	-4.32443	-4.28259	-4.24064	-4.19858	-4.15641	-4.11413	-4.07174	-4.02925	-3.98664	-3.94393
2	sub-11	1	20	-2.37e-14	-2.84e-14	-9.47e-14	4.7e-15	-8.05e-14	-7.11e-14	9.5e-15	3.79e-14	-9.95e-14	-4.8e-15	4.26e-14	-1.89e-14	-8.05e-14	9.5e-15	-4.7e-15	-9.5e-15	-3.31e-14	-4.74e-14	-8.05e-14	-4.7e-15	9.5e-15	-4.7e-15	-9.4e-15	-9.47e-14	-6.16e-14	-2.37e-14	0	-2.84e-14	-6.16e-14	-6.63e-14	0	-4.7e-15	-1.42e-14	0	9.5e-15	-3.79e-14	-3.31e-14	-7.58e-14	1.89e-14	-2.37e-14	-6.63e-14	-8.05e-14	1.9e-14	4.8e-15	-5.68e-14	-5.21e-14
3	sub-11	1	80	-3.00516	-2.97298	-2.94071	-2.90835	-2.87591	-2.84337	-2.81075	-2.77803	-2.74522	-2.71232	-2.67932	-2.64624	-2.61306	-2.57979	-2.54642	-2.51296	-2.4794	-2.44575	-2.41201	-2.37816	-2.34422	-2.31019	-2.27605	-2.24182	-2.20749	-2.17306	-3.16612	-3.12922	-3.09222	-3.05513	-3.01795	-2.98066	-2.94328	-2.9058	-2.86822	-2.83054	-2.79276	-2.75489	-2.71691	-2.67884	-2.64066	-2.60238	-2.564	-2.52553	-2.48694	-2.44826
0	sub-12	0	20	-18.3251	-18.1276	-17.9314	-17.7364	-17.5426	-17.35	-17.1586	-16.9684	-16.7793	-16.5915	-16.4048	-16.2192	-16.0348	-15.8516	-15.6694	-15.4884	-15.3085	-15.1297	-14.952	-14.7754	-14.5998	-14.4253	-14.2519	-14.0795	-13.9081	-13.7377	-13.5683	-13.3999	-13.2325	-13.066	-12.9005	-12.7359	-12.5723	-12.4095	-12.2477	-12.0867	-11.9266	-11.7673	-11.6089	-11.4513	-11.2945	-11.1385	-10.9833	-10.8288	-10.6751	-10.5221
1	sub-12	0	80	-35.9077	-35.5634	-35.219	-34.8746	-34.5301	-34.1855	-33.8409	-33.4962	-33.1514	-32.8067	-32.4618	-32.117	-31.7721	-31.4271	-31.0822	-30.7372	-30.3921	-30.0471	-29.7021	-29.357	-29.0119	-28.6669	-28.3218	-27.9767	-27.6317	-27.2866	-26.9416	-26.5966	-26.2516	-25.9066	-25.5616	-25.2167	-24.8719	-24.527	-24.1822	-23.8375	-23.4928	-23.1481	-22.8035	-22.459	-22.1145	-21.7701	-21.4258	-21.0815	-20.7373	-20.3932
2	sub-12	1	20	10.1286	10.1599	10.1882	10.2135	10.2358	10.2551	10.2715	10.2851	10.2958	10.3037	10.3088	10.3112	10.3108	10.3078	10.3022	10.294	10.2832	10.2699	10.2541	10.2359	10.2153	10.1923	10.1671	10.1395	10.1097	10.0777	10.0436	10.0073	9.96903	9.9287	9.88639	9.84215	9.79603	9.74805	9.69829	9.64676	9.59354	9.53865	9.48214	9.42408	9.36449	9.30342	9.24094	9.17708	9.11189	9.04542
3	sub-12	1	80	-15.4297	-15.128	-14.8276	-14.5285	-14.2308	-13.9344	-15.0433	-14.7483	-14.4546	-14.1622	-13.8711	-13.5813	-13.2928	-13.0056	-12.7198	-13.8393	-13.5548	-13.2715	-12.9896	-12.709	-12.4297	-12.1516	-11.8749	-11.5994	-12.7293	-12.4551	-12.1823	-11.9107	-11.6403	-11.3713	-11.1035	-10.837	-11.9758	-11.7105	-11.4465	-11.1838	-10.9223	-10.6621	-10.4031	-10.1453	-9.88878	-9.63349	-9.37944	-9.12662	-8.87502	-8.62464
0	sub-13	0	20	2.46596	2.40868	2.35141	2.29418	2.23698	2.17982	2.12273	2.06569	2.00873	1.95185	1.89505	1.83835	1.78176	1.72528	1.66893	1.61271	1.55662	1.50069	1.44491	1.38929	1.33385	1.27859	1.22352	1.16864	1.11398	1.05953	1.0053	0.9513	0.897542	0.844031	0.790774	0.737782	0.68506	0.632618	0.580463	0.528603	0.477045	0.425798	1.02781	0.976417	0.925361	0.874646	0.824279	0.774268	0.724618	0.675339
1	sub-13	0	80	-20.4312	-20.4173	-20.4009	-20.382	-20.3605	-20.3365	-20.31	-20.2811	-20.2496	-20.2157	-20.1793	-20.1405	-20.0993	-20.0557	-20.0096	-19.9612	-19.9104	-19.8573	-19.8018	-19.7439	-19.6838	-19.6214	-19.5566	-19.4897	-19.4204	-19.349	-19.2753	-19.1994	-19.1213	-19.0411	-18.9588	-18.8743	-18.7876	-18.6989	-18.6082	-18.5153	-16.7663	-16.6714	-16.5745	-16.4756	-16.3748	-14.6179	-14.5151	-14.4105	-14.304	-14.1956
2	sub-13	1	20	96.0834	95.9269	95.76	95.5826	95.3947	95.1963	94.9875	94.7681	94.5382	94.2978	94.047	93.7856	93.5137	93.2313	92.9384	92.6351	92.3212	91.9969	91.6622	91.317	90.9614	90.5954	90.219	89.8323	89.4352	89.0278	88.6101	88.1822	87.744	87.2957	86.8372	86.3685	85.8897	85.4009	84.902	84.3932	83.8744	83.3457	82.8071	82.2587	81.7005	81.1326	80.5551	79.9678	79.3711	78.7647
3	sub-13	1	80	13.301	13.2948	13.2871	13.278	13.2673	13.255	13.2413	13.226	13.2091	13.1907	13.1708	13.1493	13.1262	13.1015	13.0752	13.0473	13.0178	12.9867	12.954	12.9196	12.8837	12.8461	12.8068	12.7659	12.7234	12.6792	12.6333	12.5858	12.5366	12.4858	12.4332	12.379	12.3231	12.2656	12.2063	12.1454	12.0828	12.0185	11.9524	11.8848	11.8154	11.7443	11.6715	11.5971	11.5209	11.4431
0	sub-14	0	20	-6.38529	-6.36883	-6.35215	-6.33525	-6.31813	-6.30078	-6.28319	-6.26537	-6.24731	-6.22901	-6.21046	-6.19165	-6.17259	-6.15327	-6.13368	-6.11382	-6.09369	-6.07329	-6.05261	-6.03164	-6.01038	-5.98883	-5.96698	-5.94483	-5.92238	-5.89962	-5.87654	-5.85315	-5.8301	-5.80606	-5.7817	-5.75699	-5.73196	-5.70658	-5.68086	-5.65479	-5.62837	-5.60159	-5.57445	-5.54695	-5.51908	-5.49084	-5.46223	-5.43323	-5.40385	-5.37409
1	sub-14	0	80	-7.39354	-7.29579	-7.19826	-7.10093	-7.00383	-6.90696	-6.81032	-6.71391	-6.61774	-6.52183	-6.42616	-6.33076	-6.23562	-6.14074	-6.04614	-5.95182	-5.85779	-5.76404	-5.67059	-5.57744	-5.4846	-5.39207	-5.29985	-5.20795	-5.11638	-5.02514	-4.93424	-4.84367	-4.75346	-4.66359	-4.57408	-4.48493	-4.39615	-4.30774	-4.2197	-4.13205	-4.04478	-3.9579	-3.87141	-3.78533	-3.69964	-3.61437	-3.52951	-3.44507	-3.36105	-3.27746
2	sub-14	1	20	-3.30118e-10	-3.30147e-10	-3.30189e-10	-3.30218e-10	-3.30218e-10	-3.30147e-10	-3.30147e-10	-3.30189e-10	-3.30203e-10	-3.30147e-10	-3.30189e-10	-3.30218e-10	-3.30189e-10	-3.30189e-10	-3.30203e-10	-3.30147e-10	-3.3009e-10	-3.30147e-10	-3.30189e-10	-3.30189e-10	-3.30218e-10	-3.30118e-10	-3.30147e-10	-3.30246e-10	-3.3009e-10	-3.30118e-10	-3.30189e-10	-3.30218e-10	-3.30147e-10	-3.30147e-10	-3.30203e-10	-3.30289e-10	-3.30118e-10	-3.30147e-10	-3.30147e-10	-3.30147e-10	-3.30289e-10	-3.30147e-10	-3.30147e-10	-3.30218e-10	-3.30189e-10	-3.30246e-10	-3.30189e-10	-3.30218e-10	-3.30189e-10	-3.30147e-10
3	sub-14	1	80	-0.549225	-0.541543	-0.534128	-0.52663	-0.519222	-0.511904	-0.504848	-0.497706	-0.490651	-0.483681	-0.476797	-0.469998	-0.463282	-0.456649	-0.450271	-0.443798	-0.437406	-0.431093	-0.424857	-0.418699	-0.412791	-0.406784	-0.400851	-0.394991	-0.389204	-0.383489	-0.378019	-0.372443	-0.366937	-0.361499	-0.356128	-0.350998	-0.345758	-0.340582	-0.335471	-0.330422	-0.325435	-0.320509	-0.315644	-0.311011	-0.306262	-0.301919	-0.297281	-0.292874	-0.288346	-0.283872
0	sub-15	0	20	506.109	502.971	499.86	496.772	493.709	490.667	487.647	484.647	481.667	478.704	475.758	472.829	469.915	467.014	464.127	461.252	458.389	455.536	452.692	449.857	447.03	444.21	441.396	438.587	435.782	432.982	430.184	427.388	424.594	421.801	419.007	416.213	413.418	410.62	407.82	405.016	402.208	399.396	396.579	393.755	390.926	388.089	385.245	382.393	379.532	376.663
1	sub-15	0	80	4127.64	4093.22	4058.68	4024.04	3989.29	3954.43	3919.47	3884.4	3849.24	3813.98	3778.62	3743.17	3707.63	3671.99	3636.27	3600.46	3564.57	3528.6	3492.54	3456.41	3420.2	3383.92	3347.57	3311.15	3274.66	3238.1	3201.48	3164.8	3128.07	3091.27	3054.42	3017.52	2980.57	2943.57	2906.52	2869.43	2832.3	2795.12	2757.91	2720.67	2683.39	2646.08	2608.75	2571.39	2534	2496.59
2	sub-15	1	20	5757.59	5716.01	5674.3	5632.46	5590.49	5548.38	5506.15	5463.79	5421.3	5378.69	5335.95	5293.09	5250.11	5207.02	5163.8	5120.47	5077.02	5033.46	4989.79	4946.01	4902.11	4858.11	4814	4769.79	4725.47	4681.05	4636.52	4591.9	4547.17	4502.35	4457.43	4412.42	4367.31	4322.11	4276.82	4231.43	4185.96	4140.4	4094.75	4049.02	4003.2	3957.3	3911.31	3865.25	3819.1	3772.88
3	sub-15	1	80	983.142	970.084	957.121	944.252	931.476	918.804	906.215	893.717	881.312	868.998	856.776	844.644	832.603	820.652	808.79	797.018	785.334	773.748	762.251	750.84	739.506	728.258	717.096	706.02	695.028	684.121	673.298	662.558	651.912	641.337	630.844	620.444	610.114	599.864	589.693	579.603	569.591	559.657	549.801	540.033	530.331	520.705	511.155	501.68	492.279	482.952
0	sub-16	0	20	23.953	23.7028	23.4535	23.2052	22.9579	22.7115	22.4661	22.2216	21.9781	21.7355	21.4939	21.2532	21.0134	20.7746	20.5367	20.2997	20.0636	19.8285	19.5943	19.3609	19.1285	18.897	18.6664	18.4366	18.2078	17.9799	17.7528	17.5266	17.3013	17.0768	16.8532	16.6305	16.4086	16.1876	15.9674	15.7481	15.5296	15.312	15.0951	14.8791	14.6639	14.4495	14.236	14.0232	13.8112	13.6001
1	sub-16	0	80	27.6903	27.3666	27.0441	26.7227	26.4023	26.0831	25.765	25.4481	25.1322	24.8175	24.5039	24.1915	23.8803	23.5702	23.2612	22.9535	22.6469	22.3415	22.0373	21.7342	21.4324	21.1318	20.8323	20.5341	20.2371	19.9413	19.6468	19.3534	19.0613	18.7704	18.4808	18.1924	17.9053	17.6193	17.3347	17.0513	16.7692	16.4883	16.2087	15.9303	15.6532	15.3774	15.1029	14.8296	14.5576	14.2869
2	sub-16	1	20	-0.532588	-0.35052	-0.169864	0.00936104	0.187137	0.363446	0.538268	0.711584	0.883378	1.05363	1.22232	1.38943	1.55495	1.71885	1.88112	2.04174	2.20069	2.35796	2.51352	2.66736	2.81947	2.96982	3.11839	3.26518	3.41017	3.55333	3.69465	3.83412	3.97172	4.10743	4.24123	4.37312	4.50307	4.63107	4.7571	4.88115	5.00321	5.12325	5.24126	5.35724	5.47115	5.583	5.69276	5.80042	5.90597	6.00939
3	sub-16	1	80	21.9747	21.7534	21.5329	21.3132	21.0943	20.8762	20.6589	20.4425	20.2268	20.0119	19.7979	19.5846	19.3721	19.1604	18.9495	18.7394	18.53	18.3214	18.1136	17.9066	17.7003	17.4948	17.29	17.086	16.8827	16.6802	16.4784	16.2773	16.077	15.8773	15.6785	15.4803	15.2828	15.0861	14.89	14.6947	14.5	14.306	14.1127	13.9201	13.7282	13.5369	13.3463	13.1564	12.9671	12.7785
0	sub-18	0	20	-112.949	-110.549	-108.161	-105.786	-103.424	-101.075	-98.7384	-96.4159	-94.1071	-91.8123	-89.5318	-87.2658	-85.0145	-82.7782	-80.5572	-78.3516	-76.1616	-73.9876	-71.8296	-69.688	-67.563	-65.4547	-63.3634	-61.2893	-59.2325	-57.1933	-55.1719	-53.1684	-51.1831	-49.2161	-46.8025	-44.8752	-42.9668	-41.0775	-39.2073	-37.3565	-35.5251	-33.7135	-31.9216	-30.1497	-28.3979	-26.6664	-24.9552	-23.2646	-21.5946	-19.9454
1	sub-18	0	80	349.98	348.836	347.665	346.469	345.248	344.001	342.728	341.429	340.105	338.756	337.381	335.98	334.554	333.102	331.625	330.122	328.594	327.041	325.462	323.858	322.229	320.574	318.895	317.19	315.46	313.705	311.925	310.12	308.291	306.436	304.557	302.653	300.724	298.771	296.794	294.792	292.765	290.714	288.639	286.54	284.417	282.27	280.099	277.904	275.685	273.443
2	sub-18	1	20	-35.6253	-36.874	-38.0991	-39.3008	-40.479	-41.6339	-42.7655	-43.874	-44.9594	-46.0218	-47.0613	-48.078	-49.072	-50.0433	-50.992	-51.9183	-52.8222	-53.7037	-54.563	-55.4002	-56.2153	-57.0085	-57.7798	-58.5292	-59.2569	-59.963	-60.6476	-61.3107	-61.9524	-62.5727	-63.1719	-63.75	-64.3069	-64.843	-65.3581	-65.8524	-66.3261	-66.779	-67.2115	-67.6235	-68.015	-68.3863	-68.7374	-69.0683	-69.3792	-69.6701
3	sub-18	1	80	143.747	142.932	142.108	141.277	140.555	139.708	138.853	137.991	137.237	136.359	135.473	134.579	133.678	132.769	131.853	130.929	129.997	129.058	128.112	127.158	126.312	125.343	124.365	123.381	122.389	121.39	120.499	119.485	118.463	117.434	116.398	115.354	114.304	113.246	112.182	111.227	110.264	109.177	108.316	107.215	106.107	104.992	103.87	102.742	101.608	100.467
0	sub-19	0	20	19.0805	18.7716	18.4645	18.159	17.8553	17.5534	17.2532	16.9548	16.6583	16.3636	16.0707	15.7797	15.4906	15.2035	14.9182	14.6349	14.3536	14.0742	13.7968	13.5214	13.2481	12.9768	12.7075	12.4403	12.1752	11.9121	11.6512	11.3923	11.1356	10.881	10.6285	10.3781	10.13	9.88394	9.64008	9.3984	9.1589	8.92158	8.68645	8.45351	8.22278	7.99425	7.76792	7.54381	7.3219	7.10221
1	sub-19	0	80	42.4083	41.9911	41.575	41.1599	40.7461	40.3333	39.9217	39.5112	39.1018	38.6935	38.2863	37.8802	37.4753	37.0714	36.6687	36.267	35.8664	35.4669	35.0685	34.6712	34.2749	33.8797	33.4855	33.0924	32.7004	32.3093	31.9193	31.5303	31.1423	30.7553	30.3693	29.9843	29.6003	29.2172	28.8351	28.454	28.0738	27.6945	27.9105	27.5312	27.1528	26.7753	26.3987	26.023	25.6481	25.2741
2	sub-19	1	20	25.1163	24.6786	24.2451	23.816	23.3911	22.9705	22.5542	22.1422	21.7344	21.331	20.9318	20.5369	20.1463	19.76	19.3779	19.0001	18.6265	18.2572	17.8921	17.5313	17.1746	16.8222	16.474	16.1299	15.79	15.4542	15.1226	14.7951	14.4717	14.1524	13.8371	13.5259	13.2187	12.9155	12.6163	12.321	12.0297	11.7423	11.4587	11.179	10.9032	10.6312	10.3629	10.0984	9.83764	9.58056
3	sub-19	1	80	11.4461	11.2331	11.0221	10.9384	10.7308	10.5252	10.3216	10.1199	9.92012	9.72231	9.52643	9.3325	9.1405	8.95044	8.88768	8.7011	8.64181	8.45869	8.27749	8.09821	7.92084	7.74539	7.57184	7.40018	7.23043	7.06256	6.89658	6.85784	6.69521	6.53445	6.37555	6.21851	6.18867	6.03491	6.00835	5.85786	5.70918	5.5623	5.41722	5.27392	5.13241	4.99265	4.85466	4.71841	4.5839	4.45112
0	sub-20	0	20	-6.92034	-6.84882	-6.77706	-6.70505	-6.63282	-6.56037	-6.48771	-6.41485	-6.3418	-6.26857	-6.19518	-6.12164	-6.04794	-5.97411	-5.90016	-5.82609	-5.75192	-5.67766	-5.60332	-5.52891	-5.45443	-5.37991	-5.30536	-5.23077	-5.15617	-5.08157	-5.00697	-4.93239	-4.85784	-4.78333	-4.70887	-4.63447	-4.56015	-4.48591	-4.41176	-4.33771	-4.26378	-4.18998	-4.11632	-4.0428	-3.96944	-3.89624	-3.82323	-3.7504	-3.67778	-3.60536
1	sub-20	0	80	-17.3497	-17.1421	-16.9348	-16.7277	-16.521	-16.3145	-16.1084	-15.9025	-15.6971	-15.492	-15.2872	-15.0829	-14.8789	-14.6753	-14.4722	-14.2695	-14.0673	-13.8655	-13.6642	-13.4634	-13.2631	-13.0633	-12.8641	-12.6653	-12.4672	-12.2696	-12.0726	-11.8761	-11.6803	-11.4851	-11.2905	-11.0966	-11.1547	-10.961	-11.0194	-10.826	-10.6334	-10.4415	-10.2503	-10.0598	-9.87012	-9.68119	-9.49302	-9.30564	-9.11905	-8.93326
2	sub-20	1	20	15.2661	14.9417	14.6178	14.2944	13.9716	13.6494	13.3279	13.0072	12.6873	12.3682	12.05	11.7327	11.4165	11.1013	10.7872	10.4742	10.1625	9.85202	9.54284	9.23501	8.92858	8.6236	8.32011	8.01818	7.71783	7.41913	7.12211	6.82683	6.53333	6.24165	5.95184	5.66395	5.37802	5.09409	4.81221	4.53241	4.25475	3.97926	3.70599	3.43497	3.16625	2.89987	2.63586	2.37427	2.11514	1.85849
3	sub-20	1	80	-5.81852	-5.76936	-5.72016	-5.67093	-5.62167	-5.57237	-5.52304	-5.47369	-5.45661	-5.40706	-5.35748	-5.30788	-5.25824	-5.20859	-5.15891	-5.1092	-5.05948	-5.00973	-4.95997	-4.91018	-4.86038	-4.81056	-4.76072	-4.74319	-4.69319	-4.64318	-4.59315	-4.54312	-4.49307	-4.47534	-4.42514	-4.37494	-4.32474	-4.27453	-4.22431	-4.1741	-4.12388	-4.07367	-4.02346	-3.97325	-3.92304	-3.87284	-3.82264	-3.77245	-3.72227	-3.67209
0	sub-21	0	20	30.4967	30.1427	29.7917	29.4434	29.098	28.7554	28.4156	28.0786	27.7443	27.4127	27.0839	26.7577	26.4342	26.1133	25.7951	25.4794	25.1663	24.8558	24.5478	24.2423	23.9392	23.6386	23.3403	23.0445	22.751	22.4599	22.171	21.8844	21.6	21.3179	21.0379	20.76	20.4843	20.2106	19.939	19.6694	19.4018	19.1361	18.8723	18.6104	18.3503	18.0921	17.8356	17.5808	17.3278	17.0764
1	sub-21	0	80	42.726	42.4848	42.2393	41.9895	41.7356	41.4775	41.2152	40.949	40.6787	40.4045	40.1265	39.8446	39.5589	39.2696	38.9766	38.68	38.38	38.0764	37.7695	37.4593	37.1459	36.8292	36.5095	36.1867	35.8609	35.5322	35.2006	34.8663	34.5293	34.1897	33.8475	33.5028	33.1556	32.8062	32.4544	32.1005	31.7444	31.3862	31.026	30.6639	30.2999	29.9342	29.5667	29.1976	28.8269	28.4547
2	sub-21	1	20	32.8484	33.4826	34.1079	34.7241	35.3309	35.9282	36.5158	37.0935	37.6612	38.2186	38.7656	39.302	39.8277	40.3426	40.8464	41.339	41.8203	42.2901	42.7483	43.1948	43.6295	44.0521	44.4627	44.861	45.247	45.6206	45.9817	46.3301	46.6658	46.9887	47.2987	47.5956	47.8796	48.1504	48.408	48.6523	48.8833	49.1009	49.3051	49.4957	49.6729	49.8364	49.9864	50.1227	50.2453	50.3542
3	sub-21	1	80	9.72935	9.67258	9.61618	9.56014	9.50445	9.44909	9.39407	9.33936	9.28497	9.23087	9.17706	9.12354	9.07029	9.01729	8.96455	8.91206	8.85979	8.80775	8.75593	8.70431	8.65289	8.60165	8.55059	8.49969	8.44895	8.39836	8.34791	8.29759	8.24739	8.19729	8.1473	8.09739	8.04757	7.99781	7.94811	7.89846	7.84885	7.79927	7.7497	7.70015	7.65058	7.60101	7.55141	7.50177	7.45209	7.40234
0	sub-23	0	20	-2.42688	-2.37076	-2.31483	-2.25909	-2.20356	-2.14822	-2.0931	-2.03819	-1.98349	-1.92901	-1.87476	-1.82073	-1.76694	-1.71338	-1.66005	-1.60697	-1.55414	-1.50156	-1.44923	-1.39716	-1.34535	-1.29381	-1.24254	-1.19155	-1.14083	-1.09039	-1.04025	-0.990388	-0.940824	-0.891558	-0.842595	-0.793939	-0.745592	-0.69756	-0.649847	-0.602456	-0.555391	-0.508657	-0.462257	-0.416195	-0.370476	-0.325102	-0.280079	-0.23541	-0.191099	-0.147151
1	sub-23	0	80	6.01145	5.95642	5.90133	5.84619	5.79099	5.73573	5.68043	5.62507	5.56967	5.51421	5.45871	5.40316	5.34757	5.29193	5.23626	5.18054	5.12478	5.06899	4.91202	4.8566	4.80114	4.74565	4.69012	4.63457	4.579	4.52339	4.46777	4.41212	4.35646	4.30077	4.24508	4.08823	4.03295	3.97766	3.92237	3.86706	3.81176	3.75645	3.70114	3.64584	3.59055	3.53526	3.47999	3.42473	3.36949	3.31427
2	sub-23	1	20	17.7765	17.6109	17.4455	17.2803	17.1154	16.9506	16.786	16.6216	16.4575	16.2935	16.1298	15.9662	15.8029	15.6398	15.4769	15.3142	15.1517	14.9895	14.8275	14.6657	14.5042	14.3428	14.1818	14.0209	13.8603	13.6999	13.5397	13.3798	13.2202	13.0607	12.9016	12.7426	12.584	12.4255	12.2674	12.1094	11.9518	11.7944	11.6372	11.4803	11.3237	11.1674	11.0113	10.8554	10.6999	10.5446
3	sub-23	1	80	0.366456	0.336778	0.307439	0.278442	0.249788	0.221478	0.193515	0.165898	0.138629	0.11171	0.0851418	0.0589257	0.0330628	0.00755444	-0.0175984	-0.0423945	-0.0668328	-0.0909121	-0.114632	-0.13799	-0.160986	-0.18362	-0.256938	-0.278621	-0.299939	-0.320891	-0.341477	-0.361695	-0.381545	-0.401026	-0.420138	-0.438879	-0.457249	-0.475247	-0.492872	-0.510125	-0.527004	-0.543509	-0.559639	-0.575393	-0.590772	-0.605775	-0.620401	-0.63465	-0.648522	-0.662016
0	sub-24	0	20	-6.93464	-6.83582	-6.73734	-6.63922	-6.54145	-6.44405	-6.347	-6.25032	-6.15401	-6.05807	-5.96251	-5.86732	-5.77251	-5.67808	-5.58404	-5.49039	-5.39713	-5.30426	-5.21179	-5.11972	-5.02805	-4.93679	-4.84594	-4.7555	-4.66547	-4.57586	-4.48666	-4.39789	-4.30955	-4.22164	-4.13415	-4.0471	-3.96049	-3.87431	-3.78858	-3.70329	-3.61846	-3.53407	-3.45013	-3.36666	-3.28364	-3.20108	-3.11899	-3.17561	-3.0939	-3.01267
1	sub-24	0	80	-8.14912	-8.06411	-7.97932	-7.89473	-7.81035	-7.72619	-7.64223	-7.55848	-7.47495	-7.39163	-7.30852	-7.28217	-7.19926	-7.11656	-7.03408	-6.95181	-6.86976	-6.78792	-6.7063	-6.6249	-6.54371	-6.46274	-6.38198	-6.30145	-6.22113	-6.14102	-6.06114	-5.98147	-5.90202	-5.82279	-5.74378	-5.66499	-5.58642	-5.50806	-5.42992	-5.35201	-5.33086	-5.25316	-5.17568	-5.09841	-5.02137	-4.94454	-4.86794	-4.79155	-4.71539	-4.63945
2	sub-24	1	20	-16.6204	-16.4892	-16.3579	-16.2263	-16.0945	-15.9624	-15.8301	-15.6976	-15.5649	-15.4319	-15.2987	-15.1654	-15.0318	-14.898	-14.7641	-14.6299	-14.4956	-14.3611	-14.2263	-14.0915	-13.9564	-13.8212	-13.6858	-13.5503	-13.4146	-13.2788	-13.1428	-13.0067	-12.8704	-12.734	-12.5975	-12.4608	-12.324	-12.1871	-12.05	-11.9129	-11.7756	-11.6383	-11.7879	-11.6492	-11.5104	-11.3714	-11.2324	-11.0934	-10.9542	-10.8149
3	sub-24	1	80	-6.17911	-6.14228	-6.1054	-6.06844	-6.03142	-5.99433	-5.95716	-5.91992	-5.8826	-5.8452	-5.80771	-5.77014	-5.73248	-5.69472	-5.65687	-5.61893	-5.58088	-5.54273	-5.50448	-5.46612	-5.42765	-5.38906	-5.35036	-5.31155	-5.27261	-5.23355	-5.19436	-5.15505	-5.1156	-5.07602	-5.03631	-4.99646	-4.95647	-4.91633	-4.87605	-4.83562	-4.79504	-4.75431	-4.71342	-4.67237	-4.63117	-4.5898	-4.54827	-4.50657	-4.4647	-4.42266
0	sub-25	0	20	0.0764881	0.0355512	-0.00526641	-0.0459524	-0.0864941	-0.126879	-0.167095	-0.20713	-0.246971	-0.286606	-0.326022	-0.365207	-0.40415	-0.442838	-0.481259	-0.5194	-0.557251	-0.594799	-0.632032	-0.668939	-0.705509	-0.741729	-0.777588	-0.813075	-0.848179	-0.882889	-0.917194	-0.951083	-0.984545	-1.01757	-1.05015	-1.08227	-1.11392	-1.14509	-1.17577	-1.20596	-1.23564	-1.2648	-1.29343	-1.32153	-1.34909	-1.37609	-1.40253	-1.42839	-1.45368	-1.47839
1	sub-25	0	80	-5.76982	-5.7172	-5.66452	-5.61179	-5.55899	-5.50614	-5.45323	-5.40027	-5.34725	-5.76615	-5.71153	-5.65688	-5.60217	-5.54742	-5.49263	-5.43779	-5.38291	-5.32799	-5.27303	-5.21803	-5.16299	-5.10791	-5.0528	-4.99764	-4.94245	-4.88722	-4.83195	-4.77665	-4.72131	-4.66594	-4.61053	-4.55509	-4.49961	-4.4441	-4.38856	-4.33298	-4.27737	-4.22172	-4.16604	-4.11033	-4.05458	-3.9988	-3.94299	-3.88714	-3.83126	-3.77535
2	sub-25	1	20	-11.4281	-11.3376	-11.2468	-11.1557	-11.0645	-10.973	-10.8812	-10.7893	-10.6971	-10.6047	-10.5121	-10.4192	-10.3261	-10.2329	-10.1394	-10.0457	-9.95178	-9.85767	-9.76337	-9.66887	-9.57417	-9.47928	-9.3842	-9.28894	-9.19349	-9.09787	-9.00207	-8.90609	-8.80994	-8.71363	-8.61715	-8.52052	-8.42372	-8.32677	-8.22967	-8.13242	-8.03503	-7.93749	-7.83982	-7.74201	-7.64407	-7.54601	-7.44782	-7.34951	-7.25108	-7.15254
3	sub-25	1	80	-8.05905	-7.98569	-7.91242	-7.83924	-7.76614	-7.69312	-7.62018	-7.54733	-7.47455	-7.40186	-7.32924	-7.25669	-7.18422	-7.11183	-7.03951	-6.96726	-6.89507	-6.82296	-6.75092	-6.67894	-6.60703	-6.53518	-6.46339	-6.39167	-6.32	-6.2484	-6.17685	-6.10536	-6.03392	-5.96254	-5.89121	-5.81993	-5.74871	-5.67753	-5.6064	-5.53532	-5.46428	-5.39328	-5.32233	-5.25143	-5.18056	-5.10973	-5.03894	-4.96819	-4.89748	-4.8268
0	sub-26	0	20	-12.6487	-12.4893	-12.3299	-12.1705	-12.011	-11.8516	-11.6922	-11.5328	-11.3734	-11.2141	-11.0548	-10.8956	-10.7365	-10.5775	-10.4185	-10.2597	-10.101	-9.94237	-10.6103	-10.4493	-10.2885	-10.1278	-9.9673	-9.80702	-9.64696	-9.48713	-9.32753	-9.16819	-9.00911	-8.85031	-8.69179	-8.53357	-8.37567	-8.21808	-8.06083	-7.90394	-7.7474	-7.59123	-7.43545	-7.28006	-7.12509	-6.97053	-6.81641	-6.66273	-6.50952	-6.35677
1	sub-26	0	80	3.16338	3.19163	3.2193	3.24641	3.27294	3.29891	3.32431	3.34915	3.37341	3.39711	3.42024	3.4428	3.46479	3.48621	3.50706	3.52733	3.54702	3.56613	3.58466	3.60261	3.61996	3.63673	3.65289	3.66846	3.68342	3.69778	3.71152	3.72465	3.73715	3.74903	3.76028	3.7709	3.78087	3.79019	3.79886	3.80688	3.81423	3.82092	3.82693	3.83226	3.8369	3.84085	3.84411	3.84666	3.84851	3.84964
2	sub-26	1	20	-0.411051	-0.308195	-0.206329	-0.105453	-0.0055619	0.0933451	0.191271	0.288217	0.384187	0.479182	0.573205	0.666258	0.758343	0.849462	0.939618	1.02881	1.11705	1.20433	1.29065	1.37602	1.46044	1.54391	1.62643	1.70801	1.78865	1.86834	1.9471	2.02492	2.1018	2.17775	2.25277	2.32686	2.40002	2.47226	2.54357	2.61396	2.68342	2.75197	2.8196	2.88632	2.95212	3.01701	3.08099	3.14406	3.20622	3.26748
3	sub-26	1	80	-0.0262092	0.00312826	-0.17765	-0.14848	-0.119747	-0.0914536	-0.0636039	-0.0362011	-0.218937	-0.191748	-0.165018	-0.138748	-0.112943	-0.0876052	-0.0627364	-0.0383394	-0.0144166	0.00903008	0.0319985	0.0544867	0.0764932	0.0980162	0.119054	0.139606	0.159671	0.179248	0.198336	0.216934	0.235042	0.252659	0.269786	0.286423	0.302569	0.318225	0.333391	0.13838	0.15326	0.167651	0.181554	0.19497	0.207902	0.220351	0.232319	0.243808	0.25482	0.265358
0	sub-27	0	20	18.2346	18.0527	17.871	17.6897	17.5088	17.3282	17.148	16.9682	16.7887	16.6096	16.4308	16.2525	16.0745	15.8969	15.7196	15.5428	15.3663	15.1902	15.0145	14.8392	14.6643	14.4898	14.3157	14.142	13.9687	13.7958	13.6234	13.4513	13.2797	13.1084	12.9376	12.7672	12.5973	12.4278	12.2587	12.09	11.9217	11.7539	11.5866	11.4197	11.2532	11.0871	10.9215	10.7564	10.5917	10.4275
1	sub-27	0	80	5.82315	5.81914	5.81494	5.81054	5.80593	5.8011	5.79604	5.79075	5.78521	5.77942	5.77337	5.76705	5.76045	5.75357	5.74639	5.73891	5.73113	5.72303	5.7146	5.70584	5.69674	5.6873	5.67749	5.66733	5.65679	5.64588	5.63458	5.62289	5.6108	5.5983	5.58539	5.57206	5.55829	5.5441	5.52946	5.51437	5.49882	5.48282	5.46634	5.44939	5.43195	5.41403	5.39508	5.37616	5.35674	5.33681
2	sub-27	1	20	34.2709	33.9915	33.7121	33.4326	33.1532	32.8738	32.5944	32.3151	32.0357	31.7564	31.4771	31.1978	30.9185	30.6393	30.3601	30.0809	29.8018	29.5227	29.2436	28.9646	28.6856	28.4067	28.1277	27.8489	27.57	27.2912	27.0125	26.7338	26.4551	26.1765	25.8979	25.6194	25.3409	25.0625	24.7841	24.5058	24.2275	23.9493	23.6711	23.393	23.1149	22.8369	22.5589	22.281	22.0031	21.7253
3	sub-27	1	80	22.1464	21.9616	21.7768	21.5921	21.4074	21.2228	21.0383	20.8538	20.6694	20.4851	20.3008	20.1166	19.9325	19.7484	19.5643	19.3804	19.1965	19.0126	18.8289	18.6452	18.4615	18.2779	18.0944	17.911	17.7276	17.5443	17.361	17.1778	16.9947	16.8117	16.6287	16.4457	16.2629	16.0801	15.8973	15.7147	15.5321	15.3496	15.1671	14.9847	14.8024	14.6202	14.438	14.2559	14.0738	13.8919
0	sub-31	0	20	8.72761	8.65489	8.58217	8.50947	8.43677	8.36406	8.29136	8.21866	8.14596	8.07325	8.00054	7.92782	7.85509	7.78235	7.7096	7.63684	7.56407	7.49128	7.41847	7.34564	7.2728	7.19994	7.12706	7.05415	6.98123	6.90828	6.8353	6.7623	6.68928	6.61623	6.54315	6.47004	6.39691	6.32375	6.25056	6.17734	6.10409	6.03081	5.9575	5.88416	5.81079	5.73739	5.66396	5.5905	5.51701	5.44349
1	sub-31	0	80	5.49196	5.44766	5.4037	5.36008	5.31678	5.27381	5.23116	5.18882	5.14678	5.10505	5.06361	5.02245	4.98157	4.94097	4.90064	4.86057	4.82076	4.78119	4.74187	4.70279	4.66393	4.6253	4.58689	4.54869	4.51069	4.47289	4.43528	4.39786	4.36062	4.32355	4.28664	4.2499	4.2133	4.17685	4.14055	4.10437	4.06832	4.03239	3.99657	3.96086	3.92525	3.88973	3.8543	3.81895	3.78367	3.74846
2	sub-31	1	20	50.7819	50.3689	49.9548	49.5398	49.1237	48.7067	48.2888	47.8699	47.4501	47.0295	46.608	46.1857	45.7626	45.3387	44.9141	44.4887	44.0625	43.6357	43.2083	42.7801	42.3514	41.922	41.4921	41.0616	40.6305	40.1989	39.7668	39.3343	38.9012	38.4678	38.0339	37.5996	37.1649	36.7299	36.2946	35.8589	35.4229	34.9866	34.5501	34.1133	33.6763	33.2392	32.8018	32.3642	31.9265	31.4887
3	sub-31	1	80	5.60472	5.5661	5.52743	5.48872	5.44996	5.41117	5.37232	5.33344	5.29451	5.25554	5.21652	5.17746	5.13836	5.09921	5.06002	5.02078	4.9815	4.94217	4.9028	4.86338	4.82392	4.78441	4.74485	4.70524	4.66559	4.62589	4.58614	4.54635	4.5065	4.46661	4.42666	4.38667	4.34662	4.30653	4.26638	4.22618	4.18593	4.14562	4.10526	4.06485	4.02438	3.98386	3.94328	3.90264	3.86195	3.82119
0	sub-32	0	20	-73.119	-72.4302	-71.742	-71.0544	-70.3673	-69.6808	-68.995	-68.3098	-67.6254	-66.9417	-66.2587	-65.5766	-64.8952	-64.2147	-63.5351	-62.8564	-62.1786	-61.5018	-60.826	-60.1511	-59.4773	-58.8045	-58.1328	-57.4622	-56.7928	-56.1244	-55.4573	-54.7913	-54.1265	-53.4629	-52.8006	-52.1395	-51.4797	-51.9156	-51.2544	-50.5947	-49.9362	-49.2792	-48.6235	-47.9692	-47.3163	-47.7592	-47.1053	-46.4528	-45.8017	-45.1521
1	sub-32	0	80	-36.6074	-36.5375	-36.4687	-36.4008	-36.3337	-36.2675	-36.2022	-36.1375	-36.0735	-36.0102	-35.9475	-35.8853	-35.8235	-35.7622	-35.7013	-35.6406	-35.5802	-35.52	-35.4599	-35.3999	-35.3399	-35.2799	-35.2198	-35.1595	-35.0989	-35.0381	-34.9769	-34.9154	-34.8533	-34.7907	-34.7274	-34.6635	-34.5989	-34.5334	-34.4671	-34.3998	-34.3315	-34.2621	-34.1916	-34.1199	-34.0469	-33.9725	-33.8967	-33.8194	-33.7406	-33.6601
2	sub-32	1	20	-450.899	-448.066	-445.202	-442.306	-439.378	-436.42	-433.432	-430.413	-427.364	-424.286	-421.179	-418.042	-414.877	-411.684	-408.462	-405.213	-401.936	-398.633	-395.302	-391.946	-388.563	-385.154	-381.72	-378.261	-374.778	-371.27	-367.737	-364.182	-360.602	-357	-353.375	-349.728	-346.059	-342.368	-338.656	-334.923	-331.169	-327.396	-323.602	-319.789	-315.957	-312.106	-308.237	-304.349	-300.445	-296.523
3	sub-32	1	80	-68.0002	-67.616	-67.2288	-66.8384	-66.445	-66.0486	-65.6491	-65.2466	-64.841	-64.4325	-64.021	-63.6065	-63.4925	-63.071	-62.6466	-62.2192	-61.789	-61.6594	-61.5258	-61.0848	-60.6409	-60.1942	-59.7447	-59.2924	-58.8373	-58.6831	-58.2214	-57.757	-57.2899	-56.8202	-56.6513	-56.1751	-55.6963	-55.2149	-54.7309	-54.2443	-53.7552	-53.567	-53.0717	-52.5739	-52.0736	-51.5709	-51.0657	-50.558	-50.048	-49.5355
0	sub-33	0	20	-22.6597	-22.4527	-22.246	-22.0396	-21.8335	-21.6276	-21.422	-21.2167	-21.0117	-20.807	-20.6025	-20.3984	-20.1945	-19.9909	-19.7876	-19.5846	-19.3819	-19.1795	-18.9774	-18.7755	-18.574	-18.3728	-18.1719	-17.9712	-17.7709	-17.5709	-17.3711	-17.1717	-16.9726	-16.7737	-16.5752	-16.377	-16.1791	-15.9815	-15.7842	-15.5872	-15.3905	-15.1941	-14.998	-14.8022	-14.6068	-14.4116	-14.2167	-14.0222	-13.8279	-13.634
1	sub-33	0	80	-5.28718	-5.28209	-5.2766	-5.27072	-5.26444	-5.25774	-5.25062	-5.24308	-5.23509	-5.22667	-5.21779	-5.20846	-5.19866	-5.18839	-5.17764	-5.16641	-5.15469	-5.14247	-5.12974	-5.11651	-5.10277	-5.0885	-5.07371	-5.05838	-5.04252	-5.02612	-5.00918	-4.99168	-4.97363	-4.95502	-4.93584	-4.9161	-4.89579	-4.8749	-4.85343	-4.83138	-4.80875	-4.78553	-4.76171	-4.7373	-5.36585	-5.33776	-5.30908	-5.2798	-5.24993	-5.21945
2	sub-33	1	20	4.74e-14	-7.1e-14	1.42e-14	4.7e-15	4.26e-14	-5.68e-14	1.89e-14	-1.89e-14	3.31e-14	-1.42e-14	5.21e-14	3.79e-14	2.37e-14	3.79e-14	2.84e-14	1.89e-14	6.16e-14	1.42e-14	2.37e-14	9.5e-15	5.21e-14	-1.42e-14	-4.7e-15	-2.37e-14	-4.73e-14	-4.73e-14	7.11e-14	1.89e-14	1.89e-14	-4.7e-15	4.7e-15	-1.42e-14	1.42e-14	-3.79e-14	-2.37e-14	1.42e-14	9.5e-15	-4.7e-15	0	4.8e-15	-4.7e-15	-4.7e-15	-4.7e-15	1.42e-14	9.5e-15	4.7e-15
3	sub-33	1	80	-16.563	-16.4316	-16.3001	-16.1683	-16.0363	-15.9041	-15.7717	-15.6391	-15.5064	-15.3734	-15.2402	-15.1068	-14.9732	-14.8394	-14.7055	-14.5713	-14.4369	-14.3024	-14.1677	-14.0327	-13.8976	-13.7623	-13.6268	-13.4912	-13.3553	-13.2193	-13.0831	-12.9467	-12.8102	-12.6734	-12.5365	-12.3995	-12.2623	-12.1249	-11.9873	-11.8496	-11.7118	-11.5738	-11.4356	-11.2973	-11.1589	-11.0203	-10.8815	-10.7427	-10.6037	-10.4645
[truncated: 1,704 more columns]

## Sheet: panel B raw + bp
	subject	correct	frequency	0	1	2	3	4	5	6	7	8	9	10	11	12	13	14	15	16	17	18	19	20	21	22	23	24	25	26	27	28	29	30	31	32	33	34	35	36	37	38	39	40	41	42	43	44	45
0	102	FALSE	20	0.376574	0.371353	0.365913	0.360267	0.354429	0.348414	0.342235	0.335905	0.329437	0.322843	0.316135	0.309326	0.302427	0.295449	0.288403	0.2813	0.274151	0.266964	0.259751	0.25252	0.245279	0.238039	0.230806	0.22359	0.216398	0.209237	0.202114	0.195036	0.18801	0.181041	0.174135	0.167298	0.160535	0.153851	0.147249	0.140736	0.134314	0.127987	0.121759	0.115632	0.109611	0.103696	0.0978914	0.0921985	0.0866193	0.0811554
1	102	FALSE	40	-0.613588	-0.607258	-0.600829	-0.594305	-0.587693	-0.580996	-0.574222	-0.567375	-0.560461	-0.553486	-0.546453	-0.53937	-0.53224	-0.525069	-0.517863	-0.510625	-0.503362	-0.496078	-0.488777	-0.481465	-0.474145	-0.466824	-0.459504	-0.452191	-0.444888	-0.4376	-0.430331	-0.423084	-0.415864	-0.408673	-0.401517	-0.394397	-0.387317	-0.380281	-0.373291	-0.36635	-0.359461	-0.352627	-0.34585	-0.339132	-0.332476	-0.325884	-0.319358	-0.3129	-0.306511	-0.300193
2	102	FALSE	80	6.26254	6.25278	6.2431	6.23348	6.22394	6.21449	6.20513	6.19587	6.18671	6.17766	6.16873	6.15992	6.15124	6.14269	6.13429	6.12604	6.11795	6.11002	6.10226	6.09468	6.08729	6.08009	6.07309	6.0663	6.05973	6.05338	6.04727	6.04139	6.03576	6.03039	6.02527	6.02043	6.01587	6.01158	6.00759	6.0039	6.00052	5.99745	5.9947	5.99227	5.99018	5.98842	5.98702	5.98596	5.98526	5.98492
3	102	TRUE	20	-0.854182	-0.833533	-0.812738	-0.791805	-0.770744	-0.749562	-0.728269	-0.706875	-0.685388	-0.663819	-0.642178	-0.620473	-0.598716	-0.576916	-0.555084	-0.533229	-0.511363	-0.489495	-0.467635	-0.445795	-0.423983	-0.40221	-0.380486	-0.358821	-0.337224	-0.315706	-0.294275	-0.272941	-0.251713	-0.2306	-0.209612	-0.188755	-0.168039	-0.147472	-0.127061	-0.106815	-0.0867398	-0.0668437	-0.0471333	-0.027615	-0.00829522	0.01082	0.0297249	0.0484139	0.0668818	0.0851238
4	102	TRUE	40	1.34625	1.34909	1.35196	1.35488	1.35784	1.36084	1.36387	1.36693	1.37002	1.37314	1.37628	1.37944	1.38261	1.38579	1.38898	1.39218	1.39537	1.39855	1.40173	1.40488	1.40801	1.41112	1.41419	1.41722	1.4202	1.42312	1.42599	1.42878	1.4315	1.43414	1.43668	1.43913	1.44146	1.44368	1.44577	1.44773	1.44954	1.45119	1.45268	1.454	1.45513	1.45606	1.45679	1.4573	1.45758	1.45762
5	102	TRUE	80	-0.0703648	-0.106091	-0.141617	-0.176919	-0.211979	-0.246774	-0.281286	-0.315495	-0.349381	-0.382925	-0.41611	-0.448917	-0.48133	-0.51333	-0.544901	-0.576028	-0.606696	-0.636888	-0.666592	-0.695792	-0.724477	-0.752632	-0.780246	-0.807307	-0.833804	-0.859726	-0.885063	-0.909806	-0.933945	-0.957471	-0.980378	-1.00266	-1.0243	-1.0453	-1.06566	-1.08536	-1.1044	-1.12278	-1.1405	-1.15754	-1.17391	-1.1896	-1.20461	-1.21894	-1.23258	-1.24554
0	103	FALSE	20	6.12027	6.08517	6.04777	6.00808	5.96611	5.92189	5.87543	5.82674	5.77585	5.72278	5.66756	5.6102	5.55072	5.48917	5.42557	5.35993	5.29231	5.22272	5.15121	5.07781	5.00255	4.92547	4.84662	4.76603	4.68374	4.59981	4.51428	4.42719	4.33859	4.24854	4.15708	4.06426	3.97015	3.87479	3.77825	3.68058	3.58184	3.48209	3.38139	3.27981	3.17741	3.07425	2.9704	2.86593	2.7609	2.65538
1	103	FALSE	40	-1.04071	-0.944549	-0.850572	-0.758779	-0.669169	-0.58174	-0.496487	-0.413406	-0.33249	-0.253731	-0.17712	-0.102645	-0.0302946	0.0399444	0.108087	0.174149	0.238148	0.300102	0.36003	0.417955	0.473897	0.527879	0.579926	0.630062	0.678313	0.724706	0.769269	0.812031	0.85302	0.892267	0.929803	0.965659	0.999867	1.03246	1.06347	1.09293	1.12088	1.14735	1.17237	1.19598	1.21822	1.23911	1.25871	1.27703	1.29413	1.31003
2	103	FALSE	80	8.65516	8.62675	8.59743	8.56718	8.53599	8.50385	8.47074	8.43666	8.40158	8.36551	8.32842	8.2903	8.25114	8.21094	8.16967	8.12733	8.08391	8.03939	7.99378	7.94706	7.89922	7.85026	7.80017	7.74894	7.69657	7.64307	7.58842	7.53262	7.47568	7.41759	7.35837	7.298	7.2365	7.17387	7.11013	7.04527	6.97932	6.91228	6.84416	6.77498	6.70476	6.63351	6.56126	6.48802	6.41382	6.33868
3	103	TRUE	20	-0.340871	-0.304608	-0.268172	-0.23158	-0.194854	-0.158013	-0.121075	-0.0840633	-0.0469968	-0.00989705	0.0272144	0.0643157	0.101384	0.138397	0.175332	0.212163	0.248868	0.28542	0.321795	0.357967	0.393908	0.429593	0.464993	0.500081	0.534826	0.569201	0.603174	0.636716	0.669794	0.702379	0.734436	0.765934	0.796838	0.827116	0.856731	0.885649	0.913835	0.941252	0.967864	0.993633	1.01852	1.04249	1.06551	1.08752	1.10851	1.12842
4	103	TRUE	40	-2.1558	-2.21559	-2.27606	-2.33722	-2.39909	-2.46166	-2.52494	-2.58894	-2.65365	-2.71908	-2.78522	-2.85208	-2.91964	-2.98791	-3.05688	-3.12653	-3.19687	-3.26787	-3.33953	-3.41183	-3.48475	-3.55828	-3.6324	-3.70708	-3.78231	-3.85806	-3.93431	-4.01103	-4.08819	-4.16575	-4.24371	-4.322	-4.40062	-4.47952	-4.55866	-4.63802	-4.71755	-4.79721	-4.87697	-4.95679	-5.03662	-5.11643	-5.19617	-5.27581	-5.3553	-5.4346
5	103	TRUE	80	-3.15321	-3.05725	-2.96105	-2.86465	-2.7681	-2.67148	-2.57483	-2.47822	-2.3817	-2.28532	-2.18915	-2.09324	-1.99765	-1.90243	-1.80765	-1.71335	-1.6196	-1.52644	-1.43393	-1.34212	-1.25106	-1.16081	-1.07142	-0.982927	-0.895387	-0.808843	-0.723342	-0.638928	-0.555642	-0.473526	-0.39262	-0.312962	-0.234588	-0.157534	-0.0818331	-0.00751793	0.0653813	0.136836	0.206818	0.275303	0.342266	0.407685	0.47154	0.533811	0.594482	0.653536
0	104	FALSE	20	-0.566334	-0.533354	-0.500272	-0.467106	-0.433872	-0.400586	-0.367267	-0.333933	-0.300599	-0.267284	-0.234006	-0.200782	-0.16763	-0.134568	-0.101612	-0.0687798	-0.0360897	-0.00355828	0.0287974	0.0609605	0.0929145	0.124643	0.15613	0.187359	0.218316	0.248984	0.27935	0.309398	0.339114	0.368485	0.397497	0.426138	0.454395	0.482255	0.509708	0.536742	0.563346	0.58951	0.615225	0.640481	0.66527	0.689583	0.713412	0.736751	0.759593	0.781931
1	104	FALSE	40	1.70077	1.68492	1.66829	1.65087	1.63264	1.61359	1.5937	1.57297	1.55138	1.52892	1.50558	1.48135	1.45623	1.4302	1.40325	1.37538	1.34658	1.31685	1.28618	1.25458	1.22203	1.18853	1.15409	1.1187	1.08238	1.04511	1.0069	0.967768	0.927706	0.886726	0.844836	0.802046	0.758368	0.713812	0.668393	0.622125	0.575025	0.527109	0.478397	0.428909	0.378666	0.32769	0.276006	0.223639	0.170615	0.116962
2	104	FALSE	80	-0.352426	-0.352726	-0.353008	-0.353271	-0.353515	-0.353739	-0.353941	-0.354122	-0.35428	-0.354415	-0.354527	-0.354614	-0.354676	-0.354712	-0.354722	-0.354706	-0.354663	-0.354593	-0.354494	-0.354367	-0.354211	-0.354027	-0.353812	-0.353568	-0.353294	-0.35299	-0.352655	-0.35229	-0.351894	-0.351466	-0.351008	-0.350518	-0.349997	-0.349444	-0.348861	-0.348245	-0.347598	-0.34692	-0.346211	-0.34547	-0.344698	-0.343896	-0.343062	-0.342198	-0.341304	-0.340379
3	104	TRUE	20	-1.47301	-1.47694	-1.47999	-1.48214	-1.48341	-1.48379	-1.48329	-1.4819	-1.47963	-1.47649	-1.47248	-1.46761	-1.46189	-1.45533	-1.44795	-1.43975	-1.43074	-1.42095	-1.41039	-1.39907	-1.38701	-1.37423	-1.36076	-1.3466	-1.33178	-1.31633	-1.30026	-1.28359	-1.26636	-1.24858	-1.23028	-1.21148	-1.19221	-1.17249	-1.15236	-1.13182	-1.11092	-1.08968	-1.06812	-1.04627	-1.02415	-1.0018	-0.97923	-0.956475	-0.933559	-0.910504
4	104	TRUE	40	0.644011	0.673468	0.702704	0.731705	0.760458	0.788949	0.817165	0.845092	0.872717	0.900024	0.927001	0.953634	0.979907	1.00581	1.03132	1.05643	1.08113	1.1054	1.12922	1.15258	1.17547	1.19787	1.21977	1.24115	1.262	1.2823	1.30204	1.32121	1.33979	1.35776	1.37511	1.39183	1.4079	1.42331	1.43804	1.45208	1.46541	1.47802	1.4899	1.50104	1.51141	1.521	1.5298	1.5378	1.54499	1.55134
5	104	TRUE	80	0.668222	0.664875	0.661662	0.658582	0.655634	0.652817	0.650131	0.647574	0.645145	0.642844	0.640668	0.638617	0.636688	0.634882	0.633197	0.63163	0.630181	0.628848	0.627629	0.626524	0.62553	0.624647	0.623871	0.623203	0.62264	0.622181	0.621823	0.621567	0.621409	0.621349	0.621385	0.621515	0.621738	0.622052	0.622455	0.622947	0.623525	0.624188	0.624934	0.625762	0.626671	0.627657	0.628721	0.62986	0.631073	0.632357
0	105	FALSE	20	-0.619831	-0.616188	-0.612557	-0.608938	-0.605331	-0.601737	-0.598154	-0.594583	-0.591023	-0.587476	-0.583939	-0.580414	-0.5769	-0.573397	-0.569905	-0.566423	-0.562952	-0.559492	-0.556041	-0.552601	-0.549171	-0.545751	-0.542341	-0.538941	-0.53555	-0.532169	-0.528798	-0.525436	-0.522084	-0.518741	-0.515408	-0.512084	-0.50877	-0.505466	-0.502171	-0.498886	-0.495611	-0.492347	-0.489092	-0.485848	-0.482615	-0.479392	-0.47618	-0.47298	-0.469791	-0.466614
1	105	FALSE	40	-1.79691	-1.78814	-1.77937	-1.77059	-1.76181	-1.75303	-1.74426	-1.73548	-1.7267	-1.71793	-1.70915	-1.70038	-1.69162	-1.68286	-1.6741	-1.66535	-1.6566	-1.64786	-1.63913	-1.6304	-1.62169	-1.61298	-1.60428	-1.5956	-1.58692	-1.57826	-1.56961	-1.56097	-1.55234	-1.54373	-1.53514	-1.52656	-1.51799	-1.50945	-1.50092	-1.4924	-1.48391	-1.47543	-1.46698	-1.45854	-1.45013	-1.44173	-1.43336	-1.425	-1.41667	-1.40836
2	105	FALSE	80	-0.388686	-0.386407	-0.384106	-0.38178	-0.379433	-0.377063	-0.374672	-0.37226	-0.369827	-0.367376	-0.364905	-0.362417	-0.359912	-0.35739	-0.354852	-0.352299	-0.349733	-0.347153	-0.34456	-0.341956	-0.339342	-0.336717	-0.334083	-0.331441	-0.328791	-0.326135	-0.323472	-0.320805	-0.318134	-0.31546	-0.312783	-0.310105	-0.307425	-0.304746	-0.302067	-0.29939	-0.296715	-0.294043	-0.291374	-0.28871	-0.286051	-0.283398	-0.280751	-0.278111	-0.275479	-0.272854
3	105	TRUE	20	-0.104541	-0.101822	-0.0991044	-0.0963872	-0.0936709	-0.0909554	-0.0882404	-0.0855259	-0.0828118	-0.0800979	-0.077384	-0.0746699	-0.0719555	-0.0692405	-0.0665248	-0.0638081	-0.0610902	-0.0583708	-0.0556498	-0.0529267	-0.0502015	-0.0474737	-0.0447432	-0.0420097	-0.0392727	-0.0365322	-0.0337877	-0.031039	-0.0282858	-0.0255277	-0.0227644	-0.0199957	-0.0172211	-0.0144404	-0.0116532	-0.00885921	-0.00605803	-0.00324933	-0.000432761	0.00239204	0.00522545	0.00806782	0.0109195	0.013781	0.0166525	0.0195346
4	105	TRUE	40	-0.0915837	-0.0904685	-0.0893585	-0.0882537	-0.0871542	-0.0860601	-0.0849716	-0.0838888	-0.0828116	-0.0817403	-0.0806749	-0.0796154	-0.0785621	-0.0775149	-0.0764739	-0.0754392	-0.0744109	-0.0733889	-0.0723735	-0.0713646	-0.0703622	-0.0693665	-0.0683775	-0.0673951	-0.0664196	-0.0654508	-0.0644888	-0.0635337	-0.0625855	-0.0616443	-0.0607099	-0.0597826	-0.0588622	-0.0579489	-0.0570426	-0.0561434	-0.0552512	-0.0543661	-0.0534881	-0.0526172	-0.0517534	-0.0508966	-0.050047	-0.0492044	-0.0483688	-0.0475404
5	105	TRUE	80	1.22632	1.21455	1.20253	1.19027	1.17777	1.16505	1.1521	1.13892	1.12554	1.11195	1.09815	1.08417	1.07	1.05565	1.04113	1.02646	1.01163	0.996655	0.981549	0.96632	0.950977	0.93553	0.919989	0.904366	0.888671	0.872913	0.857106	0.841258	0.825382	0.809489	0.79359	0.777696	0.761817	0.745966	0.730153	0.71439	0.698686	0.683052	0.667499	0.652038	0.636677	0.621427	0.606297	0.591296	0.576433	0.561717
0	106	FALSE	20	1.9406	1.93681	1.93302	1.92921	1.9254	1.92159	1.91777	1.91396	1.91015	1.90635	1.90255	1.89878	1.89501	1.89127	1.88754	1.88385	1.88017	1.87653	1.87292	1.86935	1.86581	1.86231	1.85886	1.85546	1.85211	1.84881	1.84556	1.84238	1.83925	1.83619	1.8332	1.83027	1.82742	1.82465	1.82195	1.81933	1.8168	1.81435	1.812	1.80973	1.80756	1.80548	1.80351	1.80163	1.79986	1.79819
1	106	FALSE	40	0.642356	0.643348	0.644379	0.645449	0.646557	0.647701	0.64888	0.650095	0.651342	0.652621	0.653929	0.655267	0.656632	0.658021	0.659435	0.66087	0.662324	0.663796	0.665284	0.666786	0.668298	0.66982	0.671349	0.672882	0.674417	0.675952	0.677485	0.679013	0.680533	0.682043	0.683541	0.685025	0.686491	0.687938	0.689363	0.690763	0.692137	0.693482	0.694797	0.696078	0.697323	0.698532	0.699701	0.700829	0.701915	0.702956
2	106	FALSE	80	0.292971	0.295203	0.297499	0.299859	0.302282	0.304769	0.30732	0.309933	0.31261	0.315351	0.318154	0.32102	0.32395	0.326942	0.329998	0.333116	0.336296	0.339539	0.342845	0.346213	0.349642	0.353134	0.356687	0.360301	0.363977	0.367713	0.371509	0.375366	0.379282	0.383256	0.38729	0.391381	0.395529	0.399734	0.403995	0.40831	0.412679	0.417101	0.421575	0.4261	0.430674	0.435295	0.439964	0.444677	0.449434	0.454232
3	106	TRUE	20	0.6626	0.661019	0.659429	0.657827	0.656215	0.654591	0.652956	0.651308	0.649647	0.647974	0.646288	0.644588	0.642874	0.641147	0.639405	0.637649	0.635879	0.634094	0.632295	0.630481	0.628652	0.626809	0.624951	0.623078	0.621192	0.619291	0.617376	0.615447	0.613504	0.611548	0.609579	0.607596	0.605601	0.603593	0.601574	0.599542	0.597499	0.595445	0.59338	0.591305	0.589219	0.587124	0.585019	0.582906	0.580784	0.578654
4	106	TRUE	40	-0.0301131	-0.0303394	-0.0304976	-0.0305873	-0.0306083	-0.0305602	-0.0304427	-0.0302558	-0.0299992	-0.0296727	-0.0292763	-0.0288099	-0.0282736	-0.0276672	-0.026991	-0.026245	-0.0254294	-0.0245443	-0.0235901	-0.022567	-0.0214754	-0.0203156	-0.0190881	-0.0177934	-0.0164319	-0.0150043	-0.0135112	-0.0119532	-0.010331	-0.00864533	-0.00689707	-0.00508703	-0.00321607	-0.00128513	0.000704818	0.00275276	0.00485764	0.00701836	0.00923377	0.0115027	0.013824	0.0161963	0.0186184	0.0210889	0.0236066	0.0261699
5	106	TRUE	80	0.697445	0.684155	0.670416	0.656225	0.641584	0.626491	0.610948	0.594955	0.578514	0.561629	0.544301	0.526536	0.508336	0.489708	0.470656	0.451188	0.431311	0.411031	0.390358	0.3693	0.347867	0.326069	0.303918	0.281424	0.2586	0.235459	0.212014	0.188278	0.164267	0.139996	0.115479	0.0907326	0.0657733	0.0406178	0.0152831	-0.0102133	-0.0358537	-0.0616201	-0.0874943	-0.113458	-0.139493	-0.16558	-0.191701	-0.217838	-0.243971	-0.270084
0	107	FALSE	20	-1.68793	-1.71595	-1.74206	-1.76624	-1.78848	-1.80875	-1.82703	-1.84331	-1.85758	-1.86982	-1.88001	-1.88816	-1.89426	-1.89829	-1.90026	-1.90017	-1.89802	-1.89381	-1.88754	-1.87923	-1.86887	-1.85649	-1.84209	-1.8257	-1.80731	-1.78697	-1.76467	-1.74046	-1.71434	-1.68635	-1.65651	-1.62486	-1.59141	-1.55622	-1.51931	-1.48071	-1.44047	-1.39862	-1.35521	-1.31027	-1.26385	-1.21601	-1.16677	-1.11619	-1.06432	-1.01122
1	107	FALSE	40	0.188636	0.0840368	-0.0221717	-0.129946	-0.23924	-0.350004	-0.462187	-0.575735	-0.690589	-0.806691	-0.923978	-1.04238	-1.16184	-1.28229	-1.40364	-1.52583	-1.64877	-1.7724	-1.89663	-2.02138	-2.14656	-2.27208	-2.39787	-2.52383	-2.64987	-2.77591	-2.90184	-3.02758	-3.15304	-3.27811	-3.40271	-3.52675	-3.65012	-3.77274	-3.89452	-4.01535	-4.13516	-4.25384	-4.37131	-4.48747	-4.60225	-4.71555	-4.82729	-4.93739	-5.04576	-5.15232
2	107	FALSE	80	2.39112	2.34664	2.30326	2.26101	2.21992	2.18003	2.14137	2.10397	2.06785	2.03304	1.99955	1.96742	1.93666	1.90729	1.87933	1.85279	1.82767	1.804	1.78178	1.76102	1.74172	1.72389	1.70751	1.69261	1.67916	1.66718	1.65664	1.64755	1.63988	1.63364	1.62881	1.62536	1.62329	1.62258	1.62319	1.62512	1.62834	1.63282	1.63854	1.64546	1.65355	1.66279	1.67314	1.68457	1.69703	1.71049
3	107	TRUE	20	-3.28769	-3.25359	-3.21868	-3.18298	-3.14649	-3.10921	-3.07115	-3.03232	-2.99273	-2.95238	-2.91129	-2.86947	-2.82692	-2.78365	-2.73969	-2.69504	-2.64971	-2.60373	-2.5571	-2.50985	-2.462	-2.41355	-2.36453	-2.31497	-2.26488	-2.21429	-2.16323	-2.11171	-2.05976	-2.00741	-1.9547	-1.90164	-1.84828	-1.79464	-1.74075	-1.68666	-1.63239	-1.57798	-1.52347	-1.4689	-1.4143	-1.35972	-1.30519	-1.25076	-1.19646	-1.14235
4	107	TRUE	40	-3.38979	-3.38482	-3.37953	-3.37391	-3.36795	-3.36165	-3.35499	-3.34796	-3.34055	-3.33276	-3.32457	-3.31597	-3.30697	-3.29754	-3.2877	-3.27742	-3.26671	-3.25556	-3.24397	-3.23193	-3.21944	-3.2065	-3.19311	-3.17927	-3.16498	-3.15023	-3.13504	-3.11941	-3.10333	-3.08681	-3.06987	-3.05249	-3.0347	-3.01649	-2.99788	-2.97887	-2.95947	-2.93969	-2.91955	-2.89906	-2.87821	-2.85704	-2.83555	-2.81375	-2.79167	-2.7693
5	107	TRUE	80	-3.24962	-3.27961	-3.30864	-3.33669	-3.36372	-3.38971	-3.41463	-3.43844	-3.46112	-3.48265	-3.503	-3.52214	-3.54005	-3.55672	-3.5721	-3.5862	-3.59898	-3.61043	-3.62053	-3.62926	-3.6366	-3.64255	-3.64708	-3.65019	-3.65186	-3.65209	-3.65085	-3.64815	-3.64397	-3.6383	-3.63115	-3.62251	-3.61237	-3.60073	-3.58758	-3.57294	-3.5568	-3.53915	-3.52001	-3.49938	-3.47725	-3.45365	-3.42857	-3.40202	-3.37401	-3.34455
0	108	FALSE	20	6.71474	6.71608	6.71734	6.71853	6.71966	6.72074	6.72178	6.72278	6.72376	6.72471	6.72563	6.72655	6.72745	6.72833	6.72921	6.73008	6.73094	6.7318	6.73264	6.73346	6.73427	6.73505	6.73581	6.73653	6.73722	6.73785	6.73843	6.73895	6.73939	6.73974	6.74	6.74015	6.74018	6.74007	6.7398	6.73938	6.73877	6.73796	6.73694	6.73569	6.73418	6.73241	6.73034	6.72797	6.72526	6.7222
1	108	FALSE	40	3.64262	3.6972	3.75018	3.80153	3.85121	3.89917	3.94537	3.98979	4.03237	4.07309	4.11191	4.14881	4.18375	4.2167	4.24765	4.27656	4.30341	4.32819	4.35087	4.37145	4.38989	4.4062	4.42035	4.43235	4.44218	4.44984	4.45532	4.45863	4.45976	4.45871	4.4555	4.45013	4.4426	4.43292	4.42112	4.40719	4.39116	4.37305	4.35287	4.33065	4.30641	4.28018	4.25197	4.22182	4.18977	4.15583
2	108	FALSE	80	-6.28731	-6.41837	-6.54929	-6.68	-6.81045	-6.94059	-7.07035	-7.19967	-7.32851	-7.4568	-7.58447	-7.71147	-7.83773	-7.9632	-8.0878	-8.21148	-8.33417	-8.45581	-8.57632	-8.69565	-8.81372	-8.93048	-9.04584	-9.15974	-9.27211	-9.38289	-9.492	-9.59936	-9.70492	-9.8086	-9.91031	-10.01	-10.1076	-10.203	-10.2962	-10.387	-10.4755	-10.5615	-10.6449	-10.7258	-10.8039	-10.8793	-10.9518	-11.0215	-11.0881	-11.1518
3	108	TRUE	20	-1.49782	-1.49102	-1.48483	-1.47921	-1.47417	-1.4697	-1.46576	-1.46237	-1.45949	-1.45711	-1.45523	-1.45382	-1.45288	-1.45238	-1.45232	-1.45268	-1.45344	-1.45459	-1.45612	-1.45801	-1.46024	-1.4628	-1.46569	-1.46887	-1.47234	-1.47608	-1.48008	-1.48433	-1.4888	-1.49348	-1.49836	-1.50342	-1.50865	-1.51403	-1.51955	-1.52518	-1.53093	-1.53676	-1.54266	-1.54863	-1.55463	-1.56067	-1.56671	-1.57274	-1.57876	-1.58473
4	108	TRUE	40	2.03709	2.09688	2.15564	2.21333	2.2699	2.32531	2.37953	2.43253	2.48425	2.53468	2.58379	2.63153	2.67788	2.72282	2.76632	2.80836	2.84892	2.88797	2.92549	2.96148	2.99592	3.0288	3.0601	3.08981	3.11794	3.14447	3.1694	3.19273	3.21446	3.23459	3.25313	3.27009	3.28546	3.29926	3.31151	3.3222	3.33136	3.33901	3.34515	3.34981	3.353	3.35476	3.35509	3.35403	3.3516	3.34782
5	108	TRUE	80	-2.57119	-2.58997	-2.60713	-2.62265	-2.63649	-2.64861	-2.659	-2.66761	-2.67443	-2.67943	-2.68259	-2.68389	-2.6833	-2.68082	-2.67642	-2.6701	-2.66183	-2.65162	-2.63945	-2.62533	-2.60924	-2.59118	-2.57116	-2.54918	-2.52524	-2.49935	-2.47152	-2.44177	-2.41009	-2.37652	-2.34106	-2.30374	-2.26458	-2.22359	-2.18081	-2.13627	-2.08998	-2.04198	-1.99231	-1.94099	-1.88806	-1.83356	-1.77753	-1.72001	-1.66104	-1.60066
0	109	FALSE	20	-8.44099	-8.24986	-8.05732	-7.86344	-7.66827	-7.47188	-7.27431	-7.07563	-6.87589	-6.67514	-6.47345	-6.27087	-6.06745	-5.86326	-5.65834	-5.45275	-5.24656	-5.03981	-4.83256	-4.62487	-4.4168	-4.2084	-3.99973	-3.79085	-3.58181	-3.37268	-3.16351	-2.95435	-2.74528	-2.53634	-2.3276	-2.11911	-1.91095	-1.70316	-1.49581	-1.28896	-1.08268	-0.877016	-0.672042	-0.467818	-0.264407	-0.0618742	0.139718	0.340304	0.53982	0.738201
1	109	FALSE	40	-2.40221	-2.45223	-2.50106	-2.54871	-2.59517	-2.64044	-2.68452	-2.72741	-2.76911	-2.80961	-2.84892	-2.88702	-2.92392	-2.95961	-2.99409	-3.02735	-3.05939	-3.09021	-3.11978	-3.14812	-3.17521	-3.20104	-3.22561	-3.24891	-3.27093	-3.29166	-3.31109	-3.32922	-3.34603	-3.36151	-3.37565	-3.38844	-3.39987	-3.40994	-3.41862	-3.4259	-3.43179	-3.43626	-3.4393	-3.44091	-3.44107	-3.43977	-3.437	-3.43276	-3.42702	-3.41979
2	109	FALSE	80	1.2306	1.25809	1.28521	1.31193	1.33822	1.36407	1.38946	1.41437	1.43878	1.46268	1.48604	1.50886	1.53113	1.55282	1.57394	1.59447	1.61441	1.63374	1.65246	1.67057	1.68805	1.70492	1.72116	1.73678	1.75177	1.76613	1.77986	1.79297	1.80546	1.81732	1.82856	1.83919	1.8492	1.8586	1.8674	1.87559	1.88318	1.89018	1.89658	1.90239	1.90762	1.91227	1.91633	1.91983	1.92275	1.92509
3	109	TRUE	20	0.728481	0.722638	0.714631	0.704458	0.692115	0.677602	0.660921	0.642072	0.621061	0.597892	0.572572	0.545109	0.515513	0.483796	0.449968	0.414045	0.376042	0.335975	0.293863	0.249724	0.203581	0.155456	0.105372	0.0533544	-0.00056915	-0.0563707	-0.11402	-0.173487	-0.234738	-0.297738	-0.362452	-0.428841	-0.496868	-0.566491	-0.637669	-0.710357	-0.78451	-0.860081	-0.937021	-1.01528	-1.09481	-1.17555	-1.25745	-1.34046	-1.42451	-1.50955
4	109	TRUE	40	-3.47583	-3.35227	-3.22665	-3.09905	-2.96953	-2.83815	-2.705	-2.57015	-2.43366	-2.29563	-2.15611	-2.01519	-1.87295	-1.72947	-1.58482	-1.4391	-1.29237	-1.14472	-0.996228	-0.846984	-0.697065	-0.546555	-0.395534	-0.244086	-0.0922913	0.0597684	0.212012	0.364359	0.51673	0.669046	0.821229	0.9732	1.12488	1.27621	1.42709	1.57746	1.72725	1.87639	2.02481	2.17244	2.31921	2.46506	2.60993	2.75376	2.89648	3.03804
5	109	TRUE	80	2.58446	2.5615	2.53906	2.51713	2.49573	2.47484	2.45446	2.43458	2.41522	2.39635	2.37797	2.36007	2.34266	2.32571	2.30922	2.29319	2.27759	2.26243	2.24768	2.23334	2.2194	2.20583	2.19263	2.17978	2.16727	2.15509	2.14321	2.13162	2.12031	2.10926	2.09845	2.08786	2.07748	2.0673	2.05728	2.04742	2.0377	2.02809	2.01858	2.00915	1.99978	1.99045	1.98115	1.97184	1.96252	1.95316
0	110	FALSE	20	2.11272	2.11259	2.11238	2.11208	2.11169	2.11122	2.11065	2.11	2.10925	2.1084	2.10746	2.10642	2.10529	2.10405	2.10271	2.10126	2.09971	2.09805	2.09629	2.09442	2.09243	2.09033	2.08812	2.08579	2.08335	2.08079	2.07811	2.07531	2.07238	2.06934	2.06617	2.06287	2.05945	2.0559	2.05222	2.04842	2.04448	2.04041	2.03621	2.03187	2.02741	2.0228	2.01807	2.0132	2.00819	2.00304
1	110	FALSE	40	2.10916	2.11023	2.11128	2.1123	2.1133	2.11428	2.11523	2.11616	2.11706	2.11793	2.11878	2.1196	2.12039	2.12116	2.12189	2.1226	2.12328	2.12393	2.12455	2.12514	2.1257	2.12623	2.12672	2.12719	2.12762	2.12802	2.12839	2.12873	2.12904	2.12931	2.12956	2.12977	2.12995	2.1301	2.13022	2.13031	2.13037	2.13041	2.13041	2.13039	2.13035	2.13028	2.13019	2.13007	2.12994	2.12979
2	110	FALSE	80	0.903752	0.909394	0.914998	0.920562	0.926087	0.931572	0.937018	0.942423	0.947788	0.953113	0.958396	0.963638	0.968837	0.973995	0.979109	0.98418	0.989206	0.994189	0.999126	1.00402	1.00886	1.01366	1.01841	1.02311	1.02776	1.03236	1.03691	1.04141	1.04586	1.05025	1.05459	1.05888	1.0631	1.06727	1.07139	1.07544	1.07943	1.08337	1.08724	1.09104	1.09479	1.09846	1.10207	1.10562	1.10909	1.1125
3	110	TRUE	20	1.02424	1.02371	1.02316	1.02258	1.02198	1.02134	1.02067	1.01998	1.01926	1.0185	1.01771	1.0169	1.01605	1.01517	1.01426	1.01331	1.01234	1.01132	1.01028	1.0092	1.00809	1.00694	1.00576	1.00454	1.00329	1.002	1.00068	0.999316	0.997918	0.996484	0.995012	0.993503	0.991956	0.990371	0.988747	0.987086	0.985385	0.983645	0.981866	0.980048	0.97819	0.976291	0.974353	0.972374	0.970354	0.968293
4	110	TRUE	40	1.11999	1.11797	1.11591	1.11382	1.11169	1.10954	1.10735	1.10512	1.10287	1.10058	1.09826	1.09591	1.09353	1.09111	1.08867	1.0862	1.08369	1.08116	1.0786	1.076	1.07338	1.07073	1.06806	1.06535	1.06262	1.05986	1.05708	1.05427	1.05143	1.04857	1.04568	1.04277	1.03984	1.03688	1.0339	1.0309	1.02788	1.02483	1.02177	1.01868	1.01558	1.01245	1.00931	1.00614	1.00296	0.999765
5	110	TRUE	80	0.96144	0.96026	0.959068	0.957862	0.956644	0.955413	0.954168	0.95291	0.951638	0.950352	0.949051	0.947736	0.946406	0.945061	0.943701	0.942325	0.940933	0.939526	0.938102	0.936662	0.935205	0.933731	0.932239	0.93073	0.929204	0.927659	0.926096	0.924514	0.922914	0.921294	0.919655	0.917996	0.916317	0.914618	0.912899	0.911159	0.909397	0.907614	0.90581	0.903984	0.902135	0.900265	0.898371	0.896455	0.894515	0.892552
0	111	FALSE	20	5.31139	5.30515	5.29896	5.29281	5.2867	5.28063	5.27461	5.26862	5.26268	5.25677	5.25091	5.24508	5.23929	5.23353	5.22781	5.22213	5.21648	5.21086	5.20527	5.19971	5.19418	5.18868	5.18321	5.17776	5.17234	5.16693	5.16155	5.15619	5.15085	5.14552	5.14021	5.13491	5.12962	5.12434	5.11907	5.1138	5.10854	5.10329	5.09803	5.09278	5.08752	5.08226	5.07699	5.07172	5.06644	5.06114
1	111	FALSE	40	1.36551	1.38786	1.40851	1.42749	1.44486	1.46063	1.47486	1.48759	1.49885	1.50868	1.51714	1.52424	1.53005	1.53459	1.53792	1.54007	1.54108	1.541	1.53987	1.53773	1.53461	1.53057	1.52563	1.51984	1.51325	1.50588	1.49778	1.48899	1.47954	1.46947	1.45882	1.44762	1.43591	1.42372	1.41109	1.39805	1.38464	1.37088	1.3568	1.34244	1.32783	1.31299	1.29796	1.28275	1.2674	1.25193
2	111	FALSE	80	2.7623	2.76189	2.76175	2.76188	2.76226	2.76289	2.76376	2.76488	2.76623	2.76781	2.76961	2.77163	2.77387	2.77631	2.77895	2.78178	2.78481	2.78802	2.79141	2.79497	2.7987	2.80258	2.80663	2.81082	2.81517	2.81965	2.82426	2.82901	2.83388	2.83886	2.84396	2.84918	2.85449	2.8599	2.86541	2.87101	2.87669	2.88245	2.88829	2.8942	2.90018	2.90622	2.91232	2.91847	2.92467	2.93092
3	111	TRUE	20	1.69092	1.69861	1.70623	1.71376	1.72118	1.7285	1.73569	1.74273	1.74963	1.75636	1.76292	1.76929	1.77547	1.78144	1.7872	1.79274	1.79804	1.80311	1.80793	1.81249	1.8168	1.82084	1.82462	1.82811	1.83133	1.83427	1.83692	1.83928	1.84135	1.84313	1.84461	1.8458	1.8467	1.8473	1.8476	1.84762	1.84734	1.84677	1.84591	1.84477	1.84334	1.84164	1.83966	1.83742	1.8349	1.83213
4	111	TRUE	40	3.07275	3.06258	3.05274	3.04321	3.034	3.02509	3.01648	3.00816	3.00012	2.99235	2.98485	2.97761	2.9706	2.96384	2.95729	2.95096	2.94482	2.93888	2.93311	2.9275	2.92205	2.91673	2.91154	2.90645	2.90147	2.89657	2.89174	2.88697	2.88224	2.87754	2.87285	2.86816	2.86346	2.85873	2.85395	2.84912	2.84422	2.83923	2.83414	2.82894	2.82361	2.81814	2.81252	2.80672	2.80074	2.79457
5	111	TRUE	80	2.83176	2.83447	2.83641	2.83757	2.83793	2.83748	2.83622	2.83414	2.83122	2.82746	2.82285	2.81738	2.81105	2.80384	2.79576	2.78679	2.77693	2.76617	2.75452	2.74197	2.72851	2.71415	2.69888	2.68271	2.66564	2.64766	2.62879	2.60903	2.58838	2.56685	2.54444	2.52117	2.49705	2.47208	2.44628	2.41966	2.39223	2.364	2.335	2.30524	2.27473	2.2435	2.21156	2.17893	2.14564	2.11169
0	112	FALSE	20	5.36389	5.25447	5.14474	5.03481	4.92476	4.8147	4.70471	4.5949	4.48534	4.37613	4.26735	4.1591	4.05145	3.94449	3.83829	3.73294	3.6285	3.52506	3.42267	3.32142	3.22135	3.12255	3.02506	2.92895	2.83427	2.74108	2.64941	2.55933	2.47087	2.38408	2.299	2.21566	2.13409	2.05434	1.97641	1.90035	1.82617	1.7539	1.68355	1.61513	1.54867	1.48416	1.42162	1.36105	1.30246	1.24584
1	112	FALSE	40	-3.22551	-3.35403	-3.48274	-3.6116	-3.74058	-3.86964	-3.99874	-4.12784	-4.25689	-4.38584	-4.51465	-4.64326	-4.77162	-4.89967	-5.02735	-5.1546	-5.28136	-5.40757	-5.53315	-5.65804	-5.78216	-5.90546	-6.02784	-6.14924	-6.26958	-6.38879	-6.50679	-6.62349	-6.73883	-6.85272	-6.96508	-7.07584	-7.18491	-7.29222	-7.39769	-7.50123	-7.60278	-7.70226	-7.79959	-7.89469	-7.9875	-8.07794	-8.16595	-8.25145	-8.33438	-8.41467
2	112	FALSE	80	3.97093	3.87797	3.783	3.68604	3.58709	3.4862	3.38338	3.27867	3.17209	3.0637	2.95351	2.84159	2.72797	2.6127	2.49583	2.37742	2.25753	2.13622	2.01355	1.88958	1.7644	1.63806	1.51065	1.38224	1.25292	1.12276	0.991849	0.860277	0.72813	0.595501	0.462482	0.329166	0.195651	0.0620332	-0.0715892	-0.205116	-0.338448	-0.471482	-0.604118	-0.736253	-0.867785	-0.998609	-1.12862	-1.25773	-1.38582	-1.51279
3	112	TRUE	20	6.32162	6.38624	6.45035	6.51393	6.57695	6.63941	6.70126	6.76249	6.82308	6.883	6.94222	7.00073	7.05849	7.11548	7.17168	7.22706	7.28158	7.33523	7.38798	7.43979	7.49064	7.5405	7.58934	7.63713	7.68383	7.72943	7.77388	7.81715	7.8592	7.90002	7.93956	7.97778	8.01466	8.05015	8.08422	8.11685	8.14797	8.17758	8.20561	8.23205	8.25684	8.27996	8.30136	8.32101	8.33887	8.3549
4	112	TRUE	40	9.49186	9.52407	9.55367	9.58062	9.60491	9.62649	9.64533	9.66141	9.67469	9.68514	9.69272	9.69739	9.69913	9.69789	9.69364	9.68633	9.67594	9.66243	9.64575	9.62586	9.60274	9.57633	9.54661	9.51353	9.47705	9.43714	9.39377	9.34688	9.29646	9.24247	9.18487	9.12363	9.05872	8.99012	8.91779	8.84172	8.76188	8.67824	8.59079	8.49952	8.40442	8.30546	8.20264	8.09597	7.98543	7.87104
5	112	TRUE	80	3.30322	3.31527	3.32959	3.34616	3.36495	3.38591	3.40902	3.43422	3.46147	3.49073	3.52193	3.55503	3.58996	3.62666	3.66506	3.70511	3.74671	3.78981	3.83432	3.88016	3.92725	3.97551	4.02484	4.07516	4.12638	4.1784	4.23112	4.28445	4.33829	4.39253	4.44707	4.50181	4.55664	4.61146	4.66616	4.72062	4.77474	4.82842	4.88153	4.93397	4.98563	5.03639	5.08615	5.1348	5.18222	5.2283
0	113	FALSE	20	-15.0291	-14.9567	-14.8873	-14.8207	-14.757	-14.696	-14.6376	-14.5818	-14.5285	-14.4776	-14.429	-14.3826	-14.3384	-14.2962	-14.256	-14.2176	-14.181	-14.146	-14.1126	-14.0806	-14.05	-14.0206	-13.9923	-13.9651	-13.9387	-13.9132	-13.8883	-13.864	-13.8402	-13.8168	-13.7936	-13.7706	-13.7476	-13.7245	-13.7012	-13.6777	-13.6537	-13.6293	-13.6042	-13.5785	-13.5519	-13.5244	-13.496	-13.4664	-13.4356	-13.4035
1	113	FALSE	40	-16.7651	-16.5119	-16.2572	-16.0011	-15.7437	-15.4852	-15.2257	-14.9652	-14.704	-14.4421	-14.1796	-13.9166	-13.6533	-13.3899	-13.1263	-12.8628	-12.5994	-12.3364	-12.0737	-11.8115	-11.55	-11.2892	-11.0292	-10.7703	-10.5124	-10.2558	-10.0004	-9.74653	-9.49415	-9.24342	-8.99442	-8.74726	-8.50205	-8.25887	-8.01782	-7.77899	-7.54247	-7.30834	-7.07669	-6.84761	-6.62116	-6.39742	-6.17646	-5.95835	-5.74316	-5.53095
2	113	FALSE	80	-1.52312	-1.51736	-1.51162	-1.50591	-1.50022	-1.49457	-1.48894	-1.48334	-1.47776	-1.47222	-1.46671	-1.46123	-1.45577	-1.45035	-1.44496	-1.43961	-1.43428	-1.42899	-1.42372	-1.4185	-1.4133	-1.40813	-1.403	-1.3979	-1.39284	-1.3878	-1.3828	-1.37783	-1.37289	-1.36798	-1.3631	-1.35825	-1.35344	-1.34865	-1.34389	-1.33916	-1.33446	-1.32978	-1.32513	-1.32051	-1.31592	-1.31134	-1.3068	-1.30227	-1.29777	-1.29329
3	113	TRUE	20	-2.77275	-2.77471	-2.77661	-2.77848	-2.78031	-2.78211	-2.78389	-2.78565	-2.7874	-2.78914	-2.79089	-2.79265	-2.79443	-2.79623	-2.79806	-2.79993	-2.80185	-2.80382	-2.80585	-2.80794	-2.81011	-2.81236	-2.81471	-2.81714	-2.81969	-2.82235	-2.82512	-2.82803	-2.83106	-2.83425	-2.83758	-2.84106	-2.84471	-2.84853	-2.85253	-2.85671	-2.86107	-2.86563	-2.8704	-2.87536	-2.88054	-2.88593	-2.89153	-2.89736	-2.90341	-2.90969
4	113	TRUE	40	4.03448	4.0404	4.04601	4.0513	4.05625	4.06087	4.06513	4.06904	4.07258	4.07574	4.07851	4.08088	4.08284	4.08438	4.08549	4.08616	4.08638	4.08613	4.08542	4.08421	4.08251	4.08031	4.07758	4.07433	4.07053	4.06618	4.06127	4.05578	4.04971	4.04304	4.03576	4.02786	4.01932	4.01015	4.00031	3.98981	3.97864	3.96677	3.95421	3.94093	3.92693	3.91219	3.89671	3.88048	3.86348	3.8457
5	113	TRUE	80	-1.88991	-1.83548	-1.77945	-1.72183	-1.66264	-1.60191	-1.53964	-1.47587	-1.41061	-1.34388	-1.27572	-1.20614	-1.13518	-1.06285	-0.989195	-0.914238	-0.83801	-0.760545	-0.681876	-0.602037	-0.521064	-0.438993	-0.355863	-0.271711	-0.186579	-0.100506	-0.013534	0.0742937	0.162934	0.252342	0.342472	0.433279	0.524715	0.616733	0.709284	0.802318	0.895787	0.989639	1.08382	1.17829	1.27298	1.36786	1.46285	1.55792	1.653	1.74804
0	114	FALSE	20	2.0119	2.00189	1.99182	1.98167	1.97145	1.96116	1.95079	1.94036	1.92985	1.91927	1.90862	1.8979	1.8871	1.87623	1.86529	1.85428	1.84319	1.83203	1.82079	1.80947	1.79808	1.78662	1.77508	1.76346	1.75176	1.73998	1.72812	1.71618	1.70416	1.69206	1.67988	1.66761	1.65526	1.64283	1.63031	1.6177	1.605	1.59222	1.57935	1.56639	1.55335	1.54021	1.52698	1.51367	1.50026	1.48676
1	114	FALSE	40	-1.96823	-1.97216	-1.97609	-1.98	-1.9839	-1.9878	-1.99168	-1.99556	-1.99942	-2.00328	-2.00712	-2.01096	-2.01478	-2.01859	-2.02238	-2.02617	-2.02994	-2.03369	-2.03744	-2.04117	-2.04488	-2.04858	-2.05226	-2.05593	-2.05958	-2.0632	-2.06682	-2.07041	-2.07398	-2.07753	-2.08106	-2.08456	-2.08805	-2.09151	-2.09494	-2.09835	-2.10173	-2.10508	-2.1084	-2.11169	-2.11495	-2.11818	-2.12137	-2.12453	-2.12766	-2.13074
2	114	FALSE	80	1.4055	1.39378	1.38204	1.37028	1.35851	1.34673	1.33494	1.32314	1.31133	1.29951	1.28769	1.27585	1.26402	1.25218	1.24033	1.22849	1.21664	1.2048	1.19296	1.18112	1.16928	1.15746	1.14564	1.13383	1.12202	1.11024	1.09846	1.0867	1.07495	1.06322	1.05151	1.03982	1.02815	1.01651	1.00489	0.993301	0.981737	0.970204	0.958703	0.947236	0.935804	0.92441	0.913054	0.90174	0.890469	0.879242
3	114	TRUE	20	-6.06924	-6.02101	-5.97205	-5.92244	-5.87225	-5.82155	-5.77041	-5.71889	-5.66708	-5.61503	-5.56281	-5.51049	-5.45813	-5.40578	-5.35352	-5.30139	-5.24946	-5.19778	-5.14639	-5.09535	-5.04472	-4.99453	-4.94482	-4.89565	-4.84705	-4.79907	-4.75172	-4.70506	-4.65911	-4.61389	-4.56945	-4.5258	-4.48297	-4.44097	-4.39983	-4.35957	-4.32019	-4.28171	-4.24415	-4.20751	-4.17179	-4.13701	-4.10316	-4.07026	-4.03828	-4.00725
4	114	TRUE	40	0.88275	0.914942	0.947291	0.979785	1.01241	1.04516	1.07801	1.11096	1.14399	1.17709	1.21024	1.24342	1.27663	1.30985	1.34305	1.37624	1.40938	1.44246	1.47546	1.50838	1.54118	1.57386	1.60639	1.63876	1.67096	1.70295	1.73473	1.76628	1.79759	1.82863	1.85939	1.88985	1.92	1.94983	1.97931	2.00844	2.0372	2.06558	2.09356	2.12113	2.14829	2.17501	2.20129	2.22712	2.25249	2.27739
5	114	TRUE	80	-0.363903	-0.353823	-0.344237	-0.335144	-0.32654	-0.318421	-0.310784	-0.303624	-0.296935	-0.290713	-0.28495	-0.279641	-0.274778	-0.270354	-0.26636	-0.262788	-0.259629	-0.256875	-0.254515	-0.252539	-0.250936	-0.249697	-0.24881	-0.248263	-0.248045	-0.248144	-0.248546	-0.249241	-0.250215	-0.251454	-0.252946	-0.254677	-0.256633	-0.258801	-0.261165	-0.263713	-0.266429	-0.269298	-0.272307	-0.275441	-0.278684	-0.282021	-0.285438	-0.288919	-0.29245	-0.296014
0	115	FALSE	20	5.75832	5.77186	5.78524	5.79845	5.81146	5.82425	5.83678	5.84905	5.86101	5.87264	5.88392	5.8948	5.90527	5.91529	5.92483	5.93386	5.94234	5.95024	5.95752	5.96416	5.9701	5.97533	5.97979	5.98346	5.98628	5.98824	5.98927	5.98935	5.98843	5.98648	5.98345	5.97929	5.97398	5.96746	5.9597	5.95064	5.94026	5.9285	5.91533	5.90069	5.88456	5.86688	5.84762	5.82673	5.80418	5.77992
1	115	FALSE	40	3.81766	3.78955	3.76054	3.73064	3.69983	3.66812	3.63548	3.60192	3.56744	3.53202	3.49568	3.4584	3.42019	3.38104	3.34096	3.29995	3.258	3.21513	3.17133	3.12662	3.08098	3.03444	2.987	2.93865	2.88942	2.83932	2.78834	2.7365	2.68381	2.63028	2.57593	2.52076	2.46478	2.40802	2.35049	2.29218	2.23314	2.17335	2.11285	2.05163	1.98973	1.92715	1.8639	1.80001	1.73548	1.67033
2	115	FALSE	80	-4.58758	-4.58751	-4.58842	-4.59032	-4.59321	-4.59707	-4.60189	-4.60768	-4.61441	-4.62207	-4.63065	-4.64012	-4.65047	-4.66168	-4.67372	-4.68657	-4.70019	-4.71456	-4.72964	-4.74541	-4.76183	-4.77886	-4.79647	-4.81461	-4.83324	-4.85232	-4.87181	-4.89166	-4.91183	-4.93227	-4.95294	-4.97378	-4.99476	-5.01581	-5.03689	-5.05795	-5.07895	-5.09983	-5.12055	-5.14105	-5.16129	-5.18121	-5.20078	-5.21994	-5.23865	-5.25686
3	115	TRUE	20	1.87261	1.80692	1.74046	1.67325	1.60528	1.53657	1.46713	1.39695	1.32607	1.25448	1.1822	1.10924	1.03563	0.961364	0.886474	0.810973	0.734881	0.658219	0.581007	0.503267	0.425023	0.3463	0.267122	0.187516	0.10751	0.0271308	-0.0535917	-0.134628	-0.215946	-0.297515	-0.379303	-0.461277	-0.543403	-0.625646	-0.707972	-0.790347	-0.872735	-0.9551	-1.03741	-1.11962	-1.2017	-1.28362	-1.36533	-1.4468	-1.52801	-1.6089
4	115	TRUE	40	-5.29582	-5.32464	-5.35138	-5.37604	-5.3986	-5.41907	-5.43744	-5.45373	-5.46792	-5.48004	-5.49009	-5.49807	-5.50401	-5.50792	-5.50982	-5.50972	-5.50765	-5.50362	-5.49767	-5.48982	-5.4801	-5.46854	-5.45516	-5.44001	-5.42311	-5.4045	-5.38422	-5.36231	-5.3388	-5.31374	-5.28716	-5.25912	-5.22964	-5.19879	-5.16659	-5.1331	-5.09836	-5.06243	-5.02533	-4.98713	-4.94788	-4.9076	-4.86637	-4.82421	-4.78119	-4.73734
5	115	TRUE	80	-2.21726	-2.22672	-2.23556	-2.24374	-2.25126	-2.2581	-2.26423	-2.26964	-2.27432	-2.27824	-2.2814	-2.28378	-2.28537	-2.28615	-2.28612	-2.28526	-2.28357	-2.28103	-2.27764	-2.2734	-2.26829	-2.26231	-2.25546	-2.24774	-2.23914	-2.22967	-2.21932	-2.20809	-2.196	-2.18303	-2.1692	-2.1545	-2.13895	-2.12256	-2.10533	-2.08727	-2.06839	-2.0487	-2.02823	-2.00697	-1.98494	-1.96216	-1.93865	-1.91443	-1.88951	-1.86391
0	116	FALSE	20	-4.15808	-4.30558	-4.45202	-4.59729	-4.74131	-4.88399	-5.02522	-5.16491	-5.30299	-5.43937	-5.57395	-5.70667	-5.83744	-5.96618	-6.09283	-6.2173	-6.33954	-6.45946	-6.57701	-6.69213	-6.80475	-6.91481	-7.02227	-7.12706	-7.22914	-7.32846	-7.42496	-7.51861	-7.60936	-7.69717	-7.782	-7.86382	-7.94258	-8.01826	-8.09082	-8.16024	-8.22649	-8.28953	-8.34934	-8.40591	-8.4592	-8.50919	-8.55588	-8.59922	-8.63922	-8.67585
1	116	FALSE	40	3.28984	3.10965	2.92969	2.7501	2.57099	2.3925	2.21474	2.03782	1.86187	1.687	1.51331	1.34092	1.16993	1.00043	0.832542	0.666341	0.501924	0.339375	0.178779	0.0202137	-0.136246	-0.290529	-0.442568	-0.592302	-0.739671	-0.884622	-1.0271	-1.16707	-1.30448	-1.4393	-1.57149	-1.70102	-1.82787	-1.95201	-2.07343	-2.19211	-2.30805	-2.42123	-2.53165	-2.63931	-2.74422	-2.84638	-2.94581	-3.04251	-3.1365	-3.2278
2	116	FALSE	80	-3.20412	-3.20174	-3.20307	-3.20802	-3.21648	-3.22835	-3.2435	-3.26183	-3.28321	-3.30751	-3.33462	-3.3644	-3.39671	-3.43144	-3.46843	-3.50755	-3.54867	-3.59163	-3.63631	-3.68255	-3.73022	-3.77917	-3.82926	-3.88035	-3.93228	-3.98492	-4.03812	-4.09175	-4.14566	-4.1997	-4.25375	-4.30765	-4.36128	-4.4145	-4.46717	-4.51916	-4.57035	-4.62059	-4.66977	-4.71776	-4.76444	-4.80969	-4.85338	-4.89541	-4.93566	-4.97402
3	116	TRUE	20	-1.66303	-1.73517	-1.80653	-1.87706	-1.94671	-2.01544	-2.0832	-2.14993	-2.21561	-2.28017	-2.34359	-2.40581	-2.4668	-2.52652	-2.58492	-2.64198	-2.69764	-2.75189	-2.80467	-2.85596	-2.90573	-2.95394	-3.00056	-3.04556	-3.08892	-3.1306	-3.17058	-3.20883	-3.24533	-3.28005	-3.31296	-3.34405	-3.37329	-3.40067	-3.42615	-3.44973	-3.47137	-3.49107	-3.50881	-3.52457	-3.53834	-3.55009	-3.55983	-3.56753	-3.57318	-3.57677
4	116	TRUE	40	1.05359	0.977767	0.903047	0.829515	0.757257	0.686356	0.616896	0.548955	0.482613	0.417943	0.355021	0.293917	0.234698	0.177432	0.12218	0.0690035	0.0179596	-0.0308973	-0.0775156	-0.121847	-0.163845	-0.203469	-0.240679	-0.275439	-0.307715	-0.33748	-0.364705	-0.389369	-0.41145	-0.430933	-0.447805	-0.462054	-0.473675	-0.482663	-0.489019	-0.492745	-0.493848	-0.492337	-0.488224	-0.481525	-0.47226	-0.460449	-0.446119	-0.429298	-0.410017	-0.38831
5	116	TRUE	80	0.323592	0.303424	0.282615	0.261188	0.239167	0.216576	0.193441	0.16979	0.145649	0.121048	0.0960167	0.0705847	0.0447837	0.0186459	-0.00779567	-0.0345073	-0.0614544	-0.0886017	-0.115913	-0.143353	-0.170884	-0.198467	-0.226066	-0.253641	-0.281154	-0.308565	-0.335836	-0.362925	-0.389793	-0.4164	-0.442706	-0.468671	-0.494253	-0.519413	-0.544112	-0.568308	-0.591961	-0.615034	-0.637486	-0.659279	-0.680374	-0.700734	-0.720322	-0.7391	-0.757034	-0.774088
0	117	FALSE	20	-0.252272	-0.19238	-0.133769	-0.0764446	-0.0204087	0.0343362	0.0877888	0.139949	0.190818	0.240397	0.28869	0.335699	0.38143	0.425888	0.46908	0.511012	0.551694	0.591133	0.62934	0.666325	0.702099	0.736675	0.770064	0.802281	0.833339	0.863252	0.892037	0.919708	0.946282	0.971776	0.996206	1.01959	1.04195	1.0633	1.08366	1.10305	1.12148	1.13899	1.15559	1.17129	1.18613	1.20011	1.21327	1.22562	1.23718	1.24798
1	117	FALSE	40	-14.286	-14.4235	-14.5589	-14.6922	-14.8235	-14.9526	-15.0797	-15.2046	-15.3275	-15.4482	-15.5669	-15.6834	-15.7978	-15.9102	-16.0204	-16.1285	-16.2346	-16.3385	-16.4404	-16.5402	-16.6379	-16.7336	-16.8273	-16.9188	-17.0084	-17.0958	-17.1813	-17.2647	-17.3461	-17.4254	-17.5026	-17.5779	-17.651	-17.7221	-17.7911	-17.858	-17.9229	-17.9856	-18.0461	-18.1045	-18.1607	-18.2147	-18.2664	-18.3159	-18.3631	-18.408
2	117	FALSE	80	1.90209	1.80631	1.70879	1.60966	1.50903	1.40702	1.30376	1.19937	1.09397	0.987686	0.880638	0.772949	0.664744	0.556143	0.44727	0.338246	0.229189	0.12022	0.011456	-0.0969868	-0.204994	-0.312451	-0.419249	-0.525277	-0.630429	-0.7346	-0.837686	-0.939588	-1.04021	-1.13945	-1.23722	-1.33344	-1.428	-1.52084	-1.61186	-1.70098	-1.78814	-1.87326	-1.95626	-2.03708	-2.11566	-2.19194	-2.26584	-2.33733	-2.40634	-2.47283
3	117	TRUE	20	4.04429	4.08245	4.11982	4.15641	4.19222	4.22724	4.26148	4.29494	4.32762	4.35951	4.39061	4.42093	4.45047	4.47922	4.50718	4.53436	4.56075	4.58635	4.61117	4.6352	4.65844	4.6809	4.70257	4.72345	4.74355	4.76287	4.7814	4.79916	4.81613	4.83232	4.84774	4.86238	4.87624	4.88934	4.90167	4.91324	4.92405	4.93409	4.94339	4.95193	4.95972	4.96678	4.97309	4.97867	4.98351	4.98764
4	117	TRUE	40	-3.48763	-3.4824	-3.47602	-3.46845	-3.45966	-3.44962	-3.4383	-3.42567	-3.41171	-3.3964	-3.37971	-3.36162	-3.34212	-3.32119	-3.29882	-3.275	-3.24971	-3.22296	-3.19474	-3.16505	-3.13388	-3.10124	-3.06714	-3.03158	-2.99457	-2.95612	-2.91626	-2.87499	-2.83233	-2.78831	-2.74295	-2.69627	-2.6483	-2.59907	-2.5486	-2.49694	-2.44412	-2.39017	-2.33512	-2.27903	-2.22193	-2.16385	-2.10486	-2.04498	-1.98426	-1.92275
5	117	TRUE	80	-11.1568	-11.1166	-11.0736	-11.0277	-10.9789	-10.9272	-10.8727	-10.8152	-10.7548	-10.6914	-10.6251	-10.5559	-10.4837	-10.4086	-10.3305	-10.2495	-10.1657	-10.0789	-9.98926	-9.89677	-9.80146	-9.70336	-9.6025	-9.4989	-9.39262	-9.28369	-9.17216	-9.05806	-8.94146	-8.82239	-8.70092	-8.5771	-8.45099	-8.32265	-8.19215	-8.05954	-7.92491	-7.78831	-7.64982	-7.50951	-7.36746	-7.22374	-7.07843	-6.93162	-6.78337	-6.63378
0	118	FALSE	20	-0.279888	-0.272465	-0.265087	-0.257758	-0.250479	-0.243253	-0.236081	-0.228966	-0.221909	-0.214912	-0.207979	-0.20111	-0.194307	-0.187573	-0.18091	-0.17432	-0.167803	-0.161363	-0.155002	-0.14872	-0.14252	-0.136404	-0.130373	-0.124429	-0.118574	-0.112809	-0.107135	-0.101555	-0.0960687	-0.0906786	-0.0853856	-0.0801908	-0.0750954	-0.0701004	-0.0652068	-0.0604153	-0.0557267	-0.0511418	-0.0466611	-0.0422851	-0.0380141	-0.0338485	-0.0297885	-0.0258342	-0.0219855	-0.0182424
1	118	FALSE	40	-3.40556	-3.39714	-3.38869	-3.3802	-3.37167	-3.3631	-3.3545	-3.34586	-3.33718	-3.32846	-3.3197	-3.3109	-3.30205	-3.29317	-3.28425	-3.27528	-3.26627	-3.25722	-3.24812	-3.23898	-3.2298	-3.22058	-3.2113	-3.20199	-3.19263	-3.18322	-3.17377	-3.16427	-3.15472	-3.14513	-3.13549	-3.12581	-3.11607	-3.10629	-3.09646	-3.08659	-3.07666	-3.06669	-3.05667	-3.04659	-3.03647	-3.0263	-3.01608	-3.00582	-2.9955	-2.98513
2	118	FALSE	80	-2.64926	-2.6016	-2.55463	-2.50838	-2.46286	-2.41808	-2.37407	-2.33083	-2.28839	-2.24675	-2.20592	-2.16592	-2.12676	-2.08843	-2.05095	-2.01432	-1.97855	-1.94363	-1.90958	-1.87639	-1.84405	-1.81258	-1.78197	-1.7522	-1.72329	-1.69523	-1.668	-1.6416	-1.61603	-1.59127	-1.56732	-1.54416	-1.52179	-1.5002	-1.47937	-1.45929	-1.43995	-1.42134	-1.40343	-1.38622	-1.3697	-1.35384	-1.33863	-1.32405	-1.3101	-1.29675
3	118	TRUE	20	-0.303606	-0.327843	-0.351979	-0.376004	-0.399911	-0.423694	-0.447344	-0.470856	-0.494222	-0.517438	-0.540498	-0.563396	-0.586128	-0.608689	-0.631075	-0.653282	-0.675306	-0.697144	-0.718793	-0.740249	-0.761511	-0.782576	-0.803441	-0.824105	-0.844565	-0.864819	-0.884867	-0.904706	-0.924335	-0.943753	-0.962957	-0.981948	-1.00072	-1.01928	-1.03762	-1.05574	-1.07364	-1.09131	-1.10876	-1.12599	-1.14298	-1.15975	-1.17628	-1.19258	-1.20864	-1.22446
4	118	TRUE	40	-0.391263	-0.395235	-0.3992	-0.403157	-0.407104	-0.411041	-0.414967	-0.418882	-0.422784	-0.426673	-0.430548	-0.434408	-0.438253	-0.442082	-0.445894	-0.449688	-0.453463	-0.45722	-0.460956	-0.464671	-0.468365	-0.472036	-0.475685	-0.47931	-0.48291	-0.486485	-0.490034	-0.493556	-0.497051	-0.500519	-0.503957	-0.507367	-0.510746	-0.514095	-0.517413	-0.520699	-0.523953	-0.527174	-0.530361	-0.533515	-0.536634	-0.539719	-0.542768	-0.545781	-0.548758	-0.551698
5	118	TRUE	80	-0.0534173	-0.0562002	-0.0590464	-0.0619498	-0.0649044	-0.0679042	-0.0709436	-0.074017	-0.0771191	-0.0802445	-0.0833883	-0.0865455	-0.0897114	-0.0928815	-0.0960514	-0.0992168	-0.102374	-0.105518	-0.108647	-0.111755	-0.114841	-0.117901	-0.120932	-0.123931	-0.126895	-0.129822	-0.132709	-0.135555	-0.138357	-0.141114	-0.143824	-0.146484	-0.149095	-0.151655	-0.154162	-0.156615	-0.159014	-0.161359	-0.163647	-0.16588	-0.168057	-0.170176	-0.17224	-0.174246	-0.176196	-0.178089
0	119	FALSE	20	-1.88709	-1.87753	-1.86797	-1.85842	-1.84887	-1.83933	-1.8298	-1.82027	-1.81074	-1.80122	-1.79171	-1.7822	-1.77269	-1.76319	-1.75369	-1.7442	-1.73471	-1.72522	-1.71573	-1.70624	-1.69676	-1.68728	-1.6778	-1.66832	-1.65884	-1.64936	-1.63988	-1.63039	-1.62091	-1.61142	-1.60193	-1.59244	-1.58295	-1.57345	-1.56394	-1.55444	-1.54492	-1.5354	-1.52587	-1.51634	-1.5068	-1.49725	-1.48769	-1.47812	-1.46854	-1.45895
1	119	FALSE	40	10.8482	10.7429	10.633	10.5185	10.3992	10.2752	10.1465	10.0131	9.87489	9.73195	9.58427	9.43186	9.27473	9.1129	8.94641	8.77528	8.59956	8.41929	8.23453	8.04533	7.85176	7.65389	7.45181	7.2456	7.03535	6.82117	6.60316	6.38144	6.15612	5.92735	5.69525	5.45997	5.22166	4.98047	4.73658	4.49014	4.24135	3.99037	3.73741	3.48266	3.22632	2.9686	2.70971	2.44987	2.18931	1.92824
2	119	FALSE	80	-3.42957	-3.20732	-2.9877	-2.77092	-2.5572	-2.34674	-2.13976	-1.93644	-1.73699	-1.54161	-1.35048	-1.16379	-0.981724	-0.804449	-0.632138	-0.464954	-0.303055	-0.146593	0.00428736	0.149447	0.288754	0.422084	0.549316	0.670342	0.785055	0.89336	0.995166	1.09039	1.17897	1.26082	1.33589	1.40413	1.46549	1.51995	1.56747	1.60802	1.64161	1.66823	1.68787	1.70056	1.7063	1.70514	1.6971	1.68222	1.66056	1.63217
3	119	TRUE	20	-4.68175	-4.67387	-4.66532	-4.65607	-4.64611	-4.63541	-4.62395	-4.61171	-4.59867	-4.5848	-4.57009	-4.55452	-4.53808	-4.52074	-4.50248	-4.4833	-4.46318	-4.4421	-4.42005	-4.39703	-4.37302	-4.34801	-4.32199	-4.29497	-4.26692	-4.23785	-4.20775	-4.17663	-4.14448	-4.1113	-4.07709	-4.04185	-4.0056	-3.96833	-3.93005	-3.89077	-3.8505	-3.80925	-3.76703	-3.72385	-3.67973	-3.63468	-3.58872	-3.54187	-3.49414	-3.44555
4	119	TRUE	40	-0.0179223	-0.0475782	-0.076178	-0.103714	-0.130181	-0.155574	-0.179888	-0.203123	-0.225276	-0.246348	-0.26634	-0.285254	-0.303095	-0.319866	-0.335573	-0.350223	-0.363823	-0.376382	-0.38791	-0.398417	-0.407914	-0.416414	-0.423929	-0.430474	-0.436062	-0.440709	-0.444431	-0.447244	-0.449165	-0.450213	-0.450405	-0.449759	-0.448296	-0.446035	-0.442996	-0.4392	-0.434667	-0.429419	-0.423477	-0.416863	-0.409599	-0.401707	-0.393209	-0.384129	-0.374489	-0.364312
5	119	TRUE	80	-7.93039	-7.92242	-7.91501	-7.90816	-7.90189	-7.89619	-7.89107	-7.88652	-7.88256	-7.87918	-7.87637	-7.87414	-7.87248	-7.87139	-7.87086	-7.87088	-7.87145	-7.87255	-7.87418	-7.87633	-7.87898	-7.88212	-7.88573	-7.88981	-7.89432	-7.89926	-7.90461	-7.91034	-7.91643	-7.92286	-7.92961	-7.93666	-7.94397	-7.95151	-7.95928	-7.96722	-7.97532	-7.98354	-7.99185	-8.00022	-8.00861	-8.017	-8.02534	-8.03359	-8.04173	-8.04972
0	120	FALSE	20	-3.56626	-3.69513	-3.8232	-3.95042	-4.07671	-4.20201	-4.32626	-4.4494	-4.57138	-4.69213	-4.8116	-4.92973	-5.04649	-5.16181	-5.27564	-5.38795	-5.49869	-5.60782	-5.71529	-5.82107	-5.92512	-6.02741	-6.1279	-6.22656	-6.32336	-6.41827	-6.51128	-6.60234	-6.69144	-6.77856	-6.86367	-6.94676	-7.02781	-7.1068	-7.18371	-7.25854	-7.33126	-7.40187	-7.47036	-7.53671	-7.60091	-7.66296	-7.72285	-7.78057	-7.83611	-7.88947
1	120	FALSE	40	6.8949	6.89913	6.90329	6.90738	6.91141	6.91538	6.91928	6.92312	6.9269	6.93062	6.93429	6.9379	6.94146	6.94497	6.94843	6.95184	6.9552	6.95853	6.96181	6.96505	6.96825	6.97142	6.97455	6.97765	6.98071	6.98375	6.98677	6.98975	6.99271	6.99565	6.99857	7.00147	7.00434	7.0072	7.01005	7.01287	7.01569	7.01848	7.02127	7.02404	7.0268	7.02955	7.03228	7.035	7.03771	7.04041
2	120	FALSE	80	0.762392	0.754514	0.746587	0.738614	0.730596	0.722533	0.714429	0.706283	0.698099	0.689876	0.681618	0.673325	0.664999	0.656641	0.648254	0.639838	0.631395	0.622927	0.614434	0.60592	0.597385	0.588831	0.580259	0.571671	0.563068	0.554452	0.545825	0.537188	0.528542	0.519889	0.511231	0.502569	0.493904	0.485239	0.476574	0.46791	0.459251	0.450596	0.441947	0.433306	0.424674	0.416053	0.407444	0.398848	0.390266	0.381701
3	120	TRUE	20	-1.6655	-1.62437	-1.58303	-1.54153	-1.49989	-1.45815	-1.41635	-1.37453	-1.33271	-1.29094	-1.24925	-1.20768	-1.16627	-1.12504	-1.08403	-1.04329	-1.00284	-0.962712	-0.92295	-0.883582	-0.844641	-0.80616	-0.76817	-0.730701	-0.693784	-0.657447	-0.62172	-0.58663	-0.552204	-0.518468	-0.485446	-0.453164	-0.421644	-0.39091	-0.360981	-0.331879	-0.303624	-0.276233	-0.249724	-0.224114	-0.199418	-0.17565	-0.152825	-0.130955	-0.11005	-0.0901227
4	120	TRUE	40	-1.01419	-1.00492	-0.995001	-0.984455	-0.973285	-0.961499	-0.949106	-0.936116	-0.922537	-0.908381	-0.893659	-0.878382	-0.862562	-0.846212	-0.829346	-0.811976	-0.794118	-0.775785	-0.756995	-0.737762	-0.718102	-0.698034	-0.677574	-0.656741	-0.635552	-0.614027	-0.592185	-0.570046	-0.547629	-0.524957	-0.502048	-0.478925	-0.45561	-0.432123	-0.408488	-0.384726	-0.36086	-0.336914	-0.312909	-0.288869	-0.264818	-0.240777	-0.216771	-0.192822	-0.168955	-0.145191
5	120	TRUE	80	-4.78034	-4.79352	-4.80654	-4.81938	-4.83202	-4.84446	-4.85668	-4.86866	-4.88039	-4.89186	-4.90306	-4.91397	-4.92458	-4.93489	-4.94487	-4.95453	-4.96384	-4.9728	-4.98141	-4.98964	-4.9975	-5.00497	-5.01205	-5.01873	-5.025	-5.03085	-5.03629	-5.0413	-5.04588	-5.05002	-5.05372	-5.05697	-5.05978	-5.06213	-5.06403	-5.06546	-5.06643	-5.06694	-5.06698	-5.06654	-5.06563	-5.06425	-5.06238	-5.06003	-5.05721	-5.05389
0	122	FALSE	20	-6.3193	-6.28469	-6.24906	-6.2124	-6.17471	-6.13595	-6.09612	-6.0552	-6.01317	-5.97002	-5.92574	-5.88032	-5.83373	-5.78598	-5.73704	-5.68692	-5.6356	-5.58308	-5.52934	-5.47439	-5.41822	-5.36083	-5.30221	-5.24237	-5.18131	-5.11903	-5.05554	-4.99084	-4.92493	-4.85784	-4.78957	-4.72013	-4.64953	-4.5778	-4.50495	-4.431	-4.35597	-4.27989	-4.20278	-4.12466	-4.04558	-3.96554	-3.8846	-3.80278	-3.72011	-3.63664
1	122	FALSE	40	-14.949	-14.8526	-14.7507	-14.6434	-14.5307	-14.4127	-14.2896	-14.1614	-14.0282	-13.8902	-13.7475	-13.6001	-13.4483	-13.2921	-13.1316	-12.9671	-12.7985	-12.6261	-12.45	-12.2704	-12.0872	-11.9008	-11.7113	-11.5187	-11.3233	-11.1252	-10.9245	-10.7214	-10.516	-10.3085	-10.099	-9.88773	-9.67477	-9.46029	-9.24444	-9.02737	-8.80923	-8.59017	-8.37034	-8.14988	-7.92894	-7.70767	-7.48621	-7.2647	-7.0433	-6.82214
2	122	FALSE	80	-5.79976	-5.85539	-5.90737	-5.95567	-6.00026	-6.04111	-6.07819	-6.11149	-6.14098	-6.16667	-6.18853	-6.20657	-6.2208	-6.2312	-6.2378	-6.2406	-6.23964	-6.23491	-6.22646	-6.21431	-6.1985	-6.17905	-6.15602	-6.12945	-6.09939	-6.06588	-6.02899	-5.98877	-5.94528	-5.8986	-5.84878	-5.79591	-5.74005	-5.68129	-5.6197	-5.55537	-5.48838	-5.41882	-5.34679	-5.27237	-5.19566	-5.11676	-5.03575	-4.95276	-4.86786	-4.78117
3	122	TRUE	20	0.27904	0.238509	0.197411	0.155779	0.113644	0.0710359	0.0279865	-0.0154746	-0.0593178	-0.103514	-0.148035	-0.192853	-0.237942	-0.283274	-0.328824	-0.374569	-0.420483	-0.466544	-0.51273	-0.559019	-0.605391	-0.651825	-0.698304	-0.744808	-0.791321	-0.837825	-0.884305	-0.930747	-0.977135	-1.02346	-1.0697	-1.11584	-1.16189	-1.20781	-1.25362	-1.29928	-1.3448	-1.39016	-1.43536	-1.48038	-1.52522	-1.56988	-1.61433	-1.65858	-1.70261	-1.74643
4	122	TRUE	40	-0.864994	-0.873181	-0.88143	-0.889712	-0.897998	-0.906261	-0.91447	-0.922595	-0.930606	-0.938473	-0.946164	-0.953649	-0.960897	-0.967877	-0.974558	-0.980909	-0.986899	-0.992499	-0.997676	-1.0024	-1.00665	-1.01038	-1.01358	-1.01621	-1.01824	-1.01966	-1.02042	-1.02051	-1.0199	-1.01857	-1.01649	-1.01364	-1.00999	-1.00553	-1.00023	-0.994081	-0.987053	-0.979132	-0.9703	-0.96054	-0.949836	-0.938173	-0.925537	-0.911914	-0.897293	-0.881662
5	122	TRUE	80	-0.421289	-0.361706	-0.302255	-0.242971	-0.183889	-0.125043	-0.0664685	-0.00820087	0.0497248	0.107273	0.164409	0.221097	0.277302	0.332988	0.38812	0.442662	0.496581	0.54984	0.602404	0.65424	0.705311	0.755585	0.805027	0.853602	0.901278	0.948022	0.9938	1.03858	1.08233	1.12502	1.16662	1.2071	1.24642	1.28457	1.32151	1.35721	1.39164	1.42479	1.45663	1.48713	1.51627	1.54403	1.57038	1.59531	1.61881	1.64084
0	123	FALSE	20	-0.96252	-0.957253	-0.952025	-0.946836	-0.941686	-0.936576	-0.931504	-0.926471	-0.921476	-0.91652	-0.911602	-0.906721	-0.901878	-0.897073	-0.892304	-0.887573	-0.882877	-0.878218	-0.873594	-0.869006	-0.864452	-0.859934	-0.855449	-0.850999	-0.846582	-0.842198	-0.837848	-0.833529	-0.829243	-0.824988	-0.820765	-0.816573	-0.812411	-0.80828	-0.804178	-0.800106	-0.796063	-0.792048	-0.788062	-0.784103	-0.780172	-0.776268	-0.772391	-0.76854	-0.764715	-0.760915
1	123	FALSE	40	-1.71554	-1.71112	-1.70664	-1.70209	-1.69748	-1.69279	-1.68803	-1.6832	-1.6783	-1.67333	-1.66828	-1.66315	-1.65796	-1.65268	-1.64733	-1.6419	-1.6364	-1.63081	-1.62515	-1.61941	-1.61359	-1.60769	-1.60172	-1.59566	-1.58952	-1.5833	-1.57701	-1.57063	-1.56418	-1.55765	-1.55103	-1.54434	-1.53758	-1.53073	-1.52381	-1.51681	-1.50973	-1.50258	-1.49536	-1.48806	-1.48069	-1.47325	-1.46573	-1.45815	-1.45049	-1.44277
2	123	FALSE	80	2.67663	2.65453	2.63018	2.60351	2.57448	2.54304	2.50914	2.47273	2.43376	2.39219	2.34797	2.30107	2.25143	2.19902	2.14381	2.08575	2.02482	1.96099	1.89422	1.82448	1.75177	1.67605	1.59731	1.51553	1.4307	1.34281	1.25186	1.15784	1.06076	0.960617	0.857424	0.751192	0.641937	0.529681	0.414447	0.296264	0.175164	0.0511859	-0.0756298	-0.205237	-0.337584	-0.472616	-0.610273	-0.75049	-0.893197	-1.03832
3	123	TRUE	20	1.28926	1.26801	1.2451	1.22058	1.19446	1.16678	1.13758	1.10688	1.07473	1.04115	1.0062	0.969896	0.932295	0.893435	0.85336	0.812116	0.769749	0.726305	0.681835	0.636388	0.590015	0.542769	0.494701	0.445868	0.396322	0.346121	0.295322	0.243981	0.192157	0.13991	0.0872973	0.0343805	-0.0187803	-0.0721242	-0.12559	-0.179116	-0.232642	-0.286104	-0.339441	-0.392591	-0.445492	-0.498084	-0.550303	-0.602089	-0.653381	-0.704118
4	123	TRUE	40	-3.11521	-3.07942	-3.04239	-3.00417	-2.96478	-2.92428	-2.88269	-2.84007	-2.79643	-2.75183	-2.70631	-2.65989	-2.61262	-2.56454	-2.51568	-2.46608	-2.41577	-2.36479	-2.31318	-2.26097	-2.20819	-2.15488	-2.10106	-2.04678	-1.99205	-1.93692	-1.88141	-1.82556	-1.76937	-1.7129	-1.65616	-1.59918	-1.54198	-1.4846	-1.42704	-1.36935	-1.31154	-1.25364	-1.19566	-1.13764	-1.07959	-1.02153	-0.963488	-0.905481	-0.84753	-0.789657
5	123	TRUE	80	-1.02318	-1.00641	-0.989641	-0.972888	-0.956169	-0.939498	-0.922892	-0.906367	-0.889937	-0.873621	-0.857433	-0.84139	-0.825507	-0.809802	-0.79429	-0.778986	-0.763908	-0.749071	-0.734491	-0.720184	-0.706166	-0.692453	-0.679059	-0.666001	-0.653294	-0.640953	-0.628993	-0.617429	-0.606276	-0.595546	-0.585256	-0.575417	-0.566044	-0.557149	-0.548745	-0.540844	-0.533457	-0.526595	-0.52027	-0.51449	-0.509267	-0.504607	-0.500521	-0.497015	-0.494097	-0.491773
0	124	FALSE	20	-1.15638	-1.05768	-0.958628	-0.859249	-0.75956	-0.65958	-0.559328	-0.458824	-0.358086	-0.257132	-0.15598	-0.054647	0.0468502	0.148496	0.250276	0.352177	0.454185	0.55629	0.65848	0.760747	0.863082	0.96548	1.06793	1.17044	1.273	1.37561	1.47827	1.58097	1.68374	1.78656	1.88945	1.99242	2.09547	2.19861	2.30185	2.40521	2.50871	2.61235	2.71615	2.82013	2.92431	3.02871	3.13334	3.23823	3.3434	3.44886
1	124	FALSE	40	-0.717064	-1.0558	-1.3975	-1.74188	-2.08862	-2.43741	-2.78796	-3.13994	-3.49305	-3.84698	-4.2014	-4.55602	-4.9105	-5.26455	-5.61784	-5.97007	-6.32093	-6.67009	-7.01726	-7.36213	-7.7044	-8.04375	-8.37991	-8.71256	-9.04141	-9.36619	-9.6866	-10.0024	-10.3132	-10.6189	-10.9191	-11.2136	-11.5021	-11.7844	-12.0603	-12.3295	-12.5917	-12.8469	-13.0947	-13.3349	-13.5675	-13.792	-14.0085	-14.2166	-14.4163	-14.6074
2	124	FALSE	80	-0.296344	-0.585939	-0.878185	-1.17295	-1.4701	-1.7695	-2.07101	-2.3745	-2.6798	-2.98679	-3.2953	-3.60518	-3.91628	-4.22843	-4.54148	-4.85526	-5.1696	-5.48434	-5.79929	-6.11429	-6.42915	-6.74371	-7.05777	-7.37115	-7.68368	-7.99516	-8.3054	-8.61424	-8.92146	-9.22689	-9.53035	-9.83163	-10.1306	-10.427	-10.7207	-11.0114	-11.2991	-11.5836	-11.8646	-12.142	-12.4157	-12.6854	-12.951	-13.2124	-13.4694	-13.7218
3	124	TRUE	20	-5.60567	-5.61925	-5.63246	-5.64529	-5.65775	-5.66982	-5.6815	-5.6928	-5.70371	-5.71422	-5.72433	-5.73405	-5.74337	-5.7523	-5.76083	-5.76897	-5.77672	-5.78408	-5.79106	-5.79766	-5.80389	-5.80975	-5.81525	-5.82039	-5.82519	-5.82966	-5.83379	-5.8376	-5.84111	-5.84432	-5.84724	-5.84988	-5.85226	-5.85439	-5.85627	-5.85793	-5.85936	-5.8606	-5.86163	-5.86249	-5.86317	-5.8637	-5.86407	-5.86431	-5.86441	-5.8644
4	124	TRUE	40	4.46683	4.48702	4.50931	4.5337	4.56014	4.58862	4.61909	4.65153	4.68591	4.72217	4.76028	4.80019	4.84185	4.88522	4.93023	4.97684	5.02499	5.07461	5.12564	5.17802	5.23169	5.28657	5.3426	5.39971	5.45782	5.51686	5.57675	5.63743	5.69882	5.76083	5.8234	5.88644	5.94988	6.01364	6.07764	6.1418	6.20604	6.27029	6.33447	6.3985	6.46231	6.52581	6.58894	6.65161	6.71376	6.77532
5	124	TRUE	80	-5.31113	-5.43342	-5.55487	-5.67542	-5.795	-5.91355	-6.03103	-6.14736	-6.26248	-6.37634	-6.48887	-6.60001	-6.7097	-6.81787	-6.92448	-7.02945	-7.13272	-7.23424	-7.33394	-7.43177	-7.52765	-7.62155	-7.71339	-7.80311	-7.89067	-7.97601	-8.05906	-8.13979	-8.21812	-8.29402	-8.36743	-8.4383	-8.50659	-8.57224	-8.63522	-8.69547	-8.75296	-8.80764	-8.85949	-8.90845	-8.95449	-8.99758	-9.03769	-9.07479	-9.10884	-9.13983
0	125	FALSE	20	1.11894	1.11964	1.12032	1.12098	1.12163	1.12227	1.12289	1.12349	1.12407	1.12464	1.12518	1.12571	1.12621	1.12669	1.12715	1.12758	1.12799	1.12837	1.12873	1.12906	1.12936	1.12963	1.12987	1.13008	1.13026	1.1304	1.13051	1.13059	1.13063	1.13064	1.1306	1.13053	1.13042	1.13028	1.13009	1.12986	1.12959	1.12927	1.12891	1.12851	1.12806	1.12757	1.12703	1.12644	1.1258	1.12512
1	125	FALSE	40	1.49057	1.48776	1.48492	1.48207	1.4792	1.47632	1.47343	1.47054	1.46763	1.46472	1.46181	1.4589	1.456	1.45309	1.4502	1.44731	1.44443	1.44156	1.43872	1.43588	1.43307	1.43028	1.42752	1.42478	1.42206	1.41938	1.41673	1.41412	1.41154	1.409	1.4065	1.40404	1.40163	1.39926	1.39693	1.39466	1.39243	1.39026	1.38814	1.38607	1.38406	1.3821	1.3802	1.37836	1.37658	1.37486
2	125	FALSE	80	1.91782	1.9194	1.92096	1.9225	1.92402	1.92552	1.92699	1.92844	1.92987	1.93127	1.93265	1.934	1.93532	1.93662	1.93788	1.93912	1.94033	1.9415	1.94265	1.94376	1.94484	1.94589	1.9469	1.94789	1.94883	1.94975	1.95062	1.95147	1.95227	1.95304	1.95378	1.95448	1.95514	1.95576	1.95635	1.9569	1.95741	1.95789	1.95832	1.95872	1.95908	1.95941	1.95969	1.95994	1.96015	1.96033
3	125	TRUE	20	-1.6983	-1.66369	-1.62857	-1.59293	-1.55681	-1.52021	-1.48316	-1.44569	-1.4078	-1.36952	-1.33087	-1.29189	-1.25258	-1.21299	-1.17312	-1.13301	-1.09269	-1.05218	-1.0115	-0.970696	-0.929785	-0.888797	-0.847762	-0.806708	-0.765665	-0.724661	-0.683727	-0.642891	-0.602181	-0.561628	-0.52126	-0.481104	-0.441189	-0.401543	-0.362192	-0.323164	-0.284484	-0.246179	-0.208273	-0.170791	-0.133756	-0.0971925	-0.0611222	-0.0255673	0.00945121	0.0439128
4	125	TRUE	40	4.03912	4.04119	4.0432	4.04516	4.04705	4.04885	4.05057	4.05219	4.0537	4.0551	4.05636	4.05748	4.05845	4.05925	4.05987	4.0603	4.06053	4.06053	4.06031	4.05983	4.0591	4.05809	4.05679	4.05519	4.05326	4.051	4.04838	4.0454	4.04203	4.03827	4.03409	4.02948	4.02442	4.0189	4.0129	4.00641	3.99941	3.99188	3.98382	3.9752	3.96601	3.95623	3.94586	3.93488	3.92326	3.91101
5	125	TRUE	80	1.67423	1.68535	1.69616	1.70667	1.71688	1.72679	1.73642	1.74575	1.75479	1.76354	1.772	1.78018	1.78807	1.79568	1.803	1.81004	1.81679	1.82327	1.82946	1.83536	1.84098	1.84632	1.85138	1.85615	1.86064	1.86484	1.86875	1.87238	1.87571	1.87876	1.88151	1.88397	1.88613	1.88798	1.88954	1.89078	1.89171	1.89233	1.89263	1.8926	1.89223	1.89153	1.89048	1.88909	1.88733	1.88521
0	126	FALSE	20	0.271826	0.270761	0.26969	0.268615	0.267534	0.26645	0.265363	0.264273	0.263181	0.262088	0.260994	0.259901	0.258808	0.257716	0.256627	0.255541	0.254458	0.25338	0.252306	0.251239	0.250178	0.249124	0.248078	0.24704	0.246012	0.244993	0.243985	0.242989	0.242003	0.24103	0.24007	0.239124	0.238191	0.237272	0.236369	0.23548	0.234608	0.233751	0.232911	0.232089	0.231283	0.230495	0.229725	0.228973	0.228239	0.227524
1	126	FALSE	40	-4.54217	-4.5673	-4.58974	-4.60948	-4.62651	-4.64079	-4.65234	-4.66112	-4.66714	-4.6704	-4.67088	-4.66859	-4.66352	-4.6557	-4.64511	-4.63177	-4.61569	-4.59688	-4.57536	-4.55114	-4.52425	-4.49471	-4.46255	-4.42778	-4.39044	-4.35056	-4.30818	-4.26332	-4.21604	-4.16636	-4.11433	-4.06	-4.00341	-3.94462	-3.88366	-3.8206	-3.75548	-3.68838	-3.61934	-3.54842	-3.47569	-3.40122	-3.32506	-3.24729	-3.16798	-3.0872
2	126	FALSE	80	0.855179	0.854684	0.854163	0.853617	0.853045	0.852446	0.851821	0.851168	0.850487	0.849778	0.84904	0.848273	0.847476	0.846648	0.845791	0.844902	0.843981	0.843029	0.842045	0.841028	0.839978	0.838895	0.837778	0.836628	0.835443	0.834223	0.832968	0.831678	0.830353	0.828991	0.827594	0.82616	0.824689	0.823182	0.821637	0.820055	0.818435	0.816777	0.815081	0.813347	0.811573	0.809761	0.807909	0.806017	0.804086	0.802115
3	126	TRUE	20	1.26628	1.25905	1.2518	1.24455	1.23728	1.23	1.2227	1.2154	1.20809	1.20076	1.19343	1.18609	1.17873	1.17137	1.164	1.15661	1.14922	1.14183	1.13442	1.127	1.11958	1.11214	1.1047	1.09725	1.0898	1.08233	1.07486	1.06738	1.05989	1.05239	1.04489	1.03738	1.02986	1.02234	1.0148	1.00726	0.999712	0.992155	0.984591	0.977019	0.969438	0.96185	0.954253	0.946649	0.939035	0.931414
4	126	TRUE	40	0.61281	0.610893	0.608966	0.607029	0.605082	0.603124	0.601157	0.599179	0.597191	0.595193	0.593184	0.591166	0.589136	0.587097	0.585047	0.582986	0.580915	0.578834	0.576742	0.574639	0.572526	0.570402	0.568268	0.566123	0.563968	0.561802	0.559626	0.557439	0.555242	0.553034	0.550816	0.548587	0.546348	0.544099	0.54184	0.53957	0.537291	0.535001	0.532701	0.530391	0.528071	0.525742	0.523403	0.521054	0.518695	0.516327
5	126	TRUE	80	0.49871	0.495347	0.492002	0.488675	0.485365	0.482073	0.478799	0.475543	0.472304	0.469083	0.46588	0.462694	0.459526	0.456374	0.45324	0.450124	0.447023	0.44394	0.440873	0.437823	0.434788	0.431769	0.428766	0.425778	0.422805	0.419847	0.416903	0.413973	0.411056	0.408153	0.405263	0.402385	0.399519	0.396665	0.393822	0.390989	0.388167	0.385355	0.382552	0.379758	0.376973	0.374195	0.371425	0.368662	0.365906	0.363156
0	127	FALSE	20	-1.04245	-1.04528	-1.0478	-1.05002	-1.05194	-1.05358	-1.05494	-1.05603	-1.05685	-1.05741	-1.05771	-1.05776	-1.05758	-1.05716	-1.05651	-1.05564	-1.05456	-1.05327	-1.05178	-1.05009	-1.04822	-1.04617	-1.04394	-1.04155	-1.03899	-1.03628	-1.03342	-1.03042	-1.02729	-1.02402	-1.02063	-1.01712	-1.0135	-1.00977	-1.00594	-1.00201	-0.997994	-0.993891	-0.989706	-0.985445	-0.981113	-0.976715	-0.972254	-0.967735	-0.963162	-0.958539
1	127	FALSE	40	6.33666	6.33297	6.32915	6.32519	6.32109	6.31686	6.31248	6.30796	6.3033	6.29849	6.29353	6.28843	6.28317	6.27777	6.27221	6.2665	6.26063	6.25461	6.24844	6.2421	6.23562	6.22897	6.22217	6.21521	6.2081	6.20082	6.1934	6.18581	6.17807	6.17018	6.16213	6.15393	6.14558	6.13709	6.12844	6.11965	6.11071	6.10164	6.09242	6.08307	6.07359	6.06397	6.05423	6.04436	6.03438	6.02427
2	127	FALSE	80	-0.856442	-0.939899	-1.02269	-1.10478	-1.18614	-1.26672	-1.34649	-1.42541	-1.50345	-1.58056	-1.65671	-1.73185	-1.80596	-1.87898	-1.95089	-2.02163	-2.09118	-2.15948	-2.22651	-2.29221	-2.35655	-2.41949	-2.48098	-2.54098	-2.59946	-2.65637	-2.71166	-2.76531	-2.81726	-2.86747	-2.91591	-2.96254	-3.00731	-3.05019	-3.09115	-3.13013	-3.16711	-3.20204	-3.23491	-3.26567	-3.29429	-3.32075	-3.34501	-3.36705	-3.38684	-3.40437
3	127	TRUE	20	1.913	1.9151	1.91668	1.91774	1.9183	1.91835	1.9179	1.91695	1.91551	1.91359	1.91119	1.90832	1.90499	1.9012	1.89697	1.89231	1.88722	1.88172	1.87581	1.86951	1.86284	1.85579	1.84839	1.84065	1.83257	1.82419	1.8155	1.80653	1.79729	1.78779	1.77806	1.7681	1.75793	1.74757	1.73704	1.72635	1.71551	1.70455	1.69349	1.68233	1.67109	1.6598	1.64847	1.63711	1.62575	1.61439
4	127	TRUE	40	0.52118	0.534967	0.549002	0.563284	0.577811	0.592581	0.607591	0.622836	0.638312	0.65401	0.669926	0.686049	0.702372	0.718885	0.735576	0.752435	0.769448	0.786601	0.803882	0.821275	0.838763	0.856331	0.873962	0.891636	0.909337	0.927044	0.944737	0.962397	0.980001	0.99753	1.01496	1.03227	1.04944	1.06644	1.08325	1.09985	1.11621	1.13231	1.14813	1.16363	1.1788	1.19361	1.20804	1.22207	1.23566	1.24879
5	127	TRUE	80	2.53556	2.55765	2.57994	2.60243	2.62511	2.64797	2.67101	2.69421	2.71758	2.74109	2.76473	2.78851	2.81241	2.83642	2.86053	2.88473	2.90901	2.93335	2.95775	2.98219	3.00666	3.03115	3.05564	3.08013	3.1046	3.12904	3.15344	3.17777	3.20204	3.22622	3.25031	3.27428	3.29814	3.32185	3.34542	3.36883	3.39207	3.41513	3.43798	3.46063	3.48306	3.50526	3.52721	3.54892	3.57036	3.59153
0	128	FALSE	20	-14.8474	-15.3632	-15.8781	-16.3919	-16.9041	-17.4145	-17.9227	-18.4285	-18.9316	-19.4317	-19.9284	-20.4215	-20.9106	-21.3956	-21.8761	-22.3518	-22.8224	-23.2877	-23.7474	-24.2012	-24.6488	-25.0901	-25.5246	-25.9523	-26.3727	-26.7857	-27.191	-27.5884	-27.9776	-28.3585	-28.7307	-29.094	-29.4483	-29.7934	-30.1289	-30.4548	-30.7708	-31.0767	-31.3724	-31.6577	-31.9325	-32.1965	-32.4496	-32.6917	-32.9227	-33.1423
1	128	FALSE	40	6.56393	6.68389	6.80445	6.92551	7.047	7.16884	7.29095	7.41324	7.53564	7.65805	7.7804	7.9026	8.02458	8.14624	8.26752	8.38832	8.50858	8.62822	8.74715	8.86532	8.98265	9.09907	9.21452	9.32893	9.44225	9.55441	9.66536	9.77506	9.88344	9.99047	10.0961	10.2003	10.303	10.4042	10.5039	10.602	10.6984	10.7933	10.8866	10.9782	11.0681	11.1563	11.2429	11.3277	11.4109	11.4923
2	128	FALSE	80	-112.382	-112.916	-113.41	-113.865	-114.281	-114.657	-114.993	-115.289	-115.546	-115.762	-115.937	-116.072	-116.167	-116.221	-116.235	-116.207	-116.139	-116.031	-115.881	-115.691	-115.46	-115.189	-114.877	-114.524	-114.131	-113.699	-113.226	-112.713	-112.16	-111.568	-110.936	-110.266	-109.557	-108.809	-108.023	-107.199	-106.337	-105.439	-104.503	-103.531	-102.523	-101.48	-100.401	-99.2883	-98.1413	-96.9608
3	128	TRUE	20	2.27183	2.25995	2.24853	2.23756	2.22705	2.21701	2.20743	2.19832	2.18968	2.18152	2.17383	2.16663	2.15991	2.15367	2.14793	2.14267	2.1379	2.13363	2.12986	2.12657	2.12379	2.1215	2.11971	2.11842	2.11762	2.11732	2.11752	2.11821	2.1194	2.12109	2.12326	2.12593	2.12909	2.13274	2.13688	2.1415	2.1466	2.15219	2.15827	2.16482	2.17184	2.17934	2.18732	2.19576	2.20467	2.21404
4	128	TRUE	40	0.984884	1.05711	1.12775	1.19676	1.26411	1.32978	1.39375	1.45599	1.51648	1.57519	1.63212	1.68723	1.74051	1.79196	1.84155	1.88926	1.9351	1.97905	2.02109	2.06123	2.09945	2.13575	2.17012	2.20256	2.23307	2.26163	2.28826	2.31295	2.33569	2.3565	2.37537	2.3923	2.40729	2.42036	2.43149	2.44071	2.448	2.45339	2.45687	2.45845	2.45814	2.45595	2.4519	2.44598	2.43821	2.4286
5	128	TRUE	80	2.55339	2.5117	2.4701	2.42861	2.38724	2.34601	2.30493	2.26401	2.22327	2.18271	2.14234	2.10218	2.06223	2.0225	1.98299	1.9437	1.90464	1.86582	1.82723	1.78888	1.75077	1.71289	1.67525	1.63784	1.60066	1.56371	1.52699	1.49049	1.4542	1.41813	1.38227	1.34662	1.31116	1.2759	1.24082	1.20593	1.17121	1.13666	1.10228	1.06805	1.03397	1.00004	0.966251	0.932593	0.899062	0.865652
0	129	FALSE	20	2.90768	2.90635	2.90495	2.90348	2.90196	2.90038	2.89874	2.89705	2.89532	2.89354	2.89172	2.88987	2.88799	2.88608	2.88415	2.8822	2.88023	2.87826	2.87628	2.87431	2.87234	2.87038	2.86844	2.86653	2.86463	2.86278	2.86096	2.85918	2.85746	2.85579	2.85418	2.85264	2.85118	2.8498	2.8485	2.8473	2.8462	2.8452	2.84432	2.84356	2.84293	2.84242	2.84206	2.84185	2.84179	2.8419
1	129	FALSE	40	1.9759	1.93202	1.88404	1.83202	1.776	1.71604	1.65221	1.58457	1.51318	1.43811	1.35942	1.2772	1.19151	1.10243	1.01004	0.914417	0.815651	0.713824	0.609025	0.501345	0.390875	0.27771	0.161948	0.043686	-0.0769741	-0.19993	-0.325076	-0.452306	-0.581513	-0.712585	-0.845413	-0.979883	-1.11588	-1.25329	-1.392	-1.53189	-1.67285	-1.81475	-1.95748	-2.10092	-2.24496	-2.38947	-2.53434	-2.67945	-2.82469	-2.96994
2	129	FALSE	80	8.86478	8.51326	8.15609	7.79345	7.42548	7.05237	6.67428	6.29141	5.90393	5.51205	5.11597	4.71589	4.31202	3.90458	3.4938	3.07989	2.66308	2.24361	1.82171	1.39762	0.971595	0.543868	0.114692	-0.315683	-0.747001	-1.17901	-1.61145	-2.04406	-2.47658	-2.90874	-3.3403	-3.77098	-4.20051	-4.62864	-5.0551	-5.47962	-5.90195	-6.32182	-6.73898	-7.15316	-7.5641	-7.97157	-8.3753	-8.77506	-9.17059	-9.56167
3	129	TRUE	20	-1.42668	-1.42085	-1.41384	-1.40566	-1.39632	-1.38583	-1.37419	-1.3614	-1.34749	-1.33247	-1.31634	-1.29912	-1.28083	-1.26149	-1.24111	-1.2197	-1.1973	-1.17392	-1.14958	-1.1243	-1.09811	-1.07103	-1.04308	-1.01429	-0.984687	-0.954288	-0.923123	-0.891219	-0.858601	-0.825295	-0.79133	-0.756732	-0.721529	-0.685747	-0.649414	-0.612559	-0.575208	-0.537389	-0.499129	-0.460458	-0.421402	-0.381989	-0.342246	-0.302202	-0.261883	-0.221318
4	129	TRUE	40	-3.22618	-3.22574	-3.22515	-3.22439	-3.22346	-3.22236	-3.22106	-3.21957	-3.21788	-3.21597	-3.21383	-3.21146	-3.20884	-3.20597	-3.20282	-3.1994	-3.19568	-3.19166	-3.18732	-3.18266	-3.17765	-3.17228	-3.16655	-3.16043	-3.15392	-3.147	-3.13965	-3.13186	-3.12362	-3.11492	-3.10573	-3.09604	-3.08585	-3.07513	-3.06387	-3.05205	-3.03967	-3.0267	-3.01314	-2.99896	-2.98417	-2.96873	-2.95264	-2.93589	-2.91847	-2.90035
5	129	TRUE	80	-1.19708	-1.17773	-1.15996	-1.1438	-1.12928	-1.11643	-1.10527	-1.09583	-1.08812	-1.08217	-1.07799	-1.0756	-1.07499	-1.07619	-1.07919	-1.084	-1.09061	-1.09903	-1.10924	-1.12124	-1.13502	-1.15055	-1.16784	-1.18684	-1.20756	-1.22995	-1.254	-1.27967	-1.30694	-1.33577	-1.36613	-1.39797	-1.43127	-1.46599	-1.50207	-1.53947	-1.57815	-1.61807	-1.65917	-1.7014	-1.74472	-1.78907	-1.83439	-1.88064	-1.92776	-1.97569
0	130	FALSE	20	0.667135	0.664218	0.661287	0.658342	0.655384	0.652414	0.649432	0.646437	0.643431	0.640413	0.637385	0.634346	0.631297	0.628237	0.625168	0.62209	0.619003	0.615907	0.612803	0.609691	0.606571	0.603444	0.600309	0.597168	0.594021	0.590868	0.587708	0.584543	0.581373	0.578198	0.575018	0.571834	0.568646	0.565454	0.562258	0.559059	0.555857	0.552652	0.549444	0.546234	0.543022	0.539807	0.536591	0.533373	0.530154	0.526934
1	130	FALSE	40	1.36299	1.35704	1.35105	1.34502	1.33894	1.33282	1.32667	1.32047	1.31423	1.30795	1.30163	1.29527	1.28887	1.28243	1.27596	1.26945	1.2629	1.25632	1.2497	1.24305	1.23636	1.22964	1.22288	1.21609	1.20927	1.20242	1.19554	1.18862	1.18168	1.1747	1.1677	1.16067	1.15361	1.14653	1.13942	1.13228	1.12512	1.11793	1.11073	1.10349	1.09624	1.08896	1.08166	1.07434	1.067	1.05964
2	130	FALSE	80	-2.44216	-2.43158	-2.42099	-2.41039	-2.39978	-2.38917	-2.37854	-2.36791	-2.35727	-2.34663	-2.33598	-2.32532	-2.31466	-2.304	-2.29334	-2.28268	-2.27201	-2.26134	-2.25068	-2.24001	-2.22935	-2.21869	-2.20804	-2.19738	-2.18674	-2.1761	-2.16546	-2.15483	-2.14421	-2.1336	-2.123	-2.1124	-2.10182	-2.09125	-2.08068	-2.07014	-2.0596	-2.04908	-2.03857	-2.02807	-2.01759	-2.00713	-1.99668	-1.98625	-1.97583	-1.96544
3	130	TRUE	20	-1.11435	-1.11415	-1.11381	-1.11331	-1.11265	-1.11182	-1.11084	-1.10968	-1.10836	-1.10686	-1.10518	-1.10333	-1.10128	-1.09905	-1.09663	-1.09401	-1.09119	-1.08817	-1.08495	-1.08151	-1.07786	-1.07399	-1.0699	-1.06559	-1.06106	-1.05629	-1.05129	-1.04605	-1.04057	-1.03485	-1.02889	-1.02267	-1.01621	-1.0095	-1.00253	-0.995312	-0.987833	-0.980096	-0.9721	-0.963844	-0.955327	-0.94655	-0.937511	-0.928212	-0.918653	-0.908835
4	130	TRUE	40	1.05382	1.05701	1.06014	1.06321	1.06622	1.06915	1.07201	1.07479	1.07748	1.08009	1.0826	1.08502	1.08733	1.08954	1.09163	1.09361	1.09547	1.0972	1.0988	1.10026	1.10158	1.10276	1.10378	1.10465	1.10536	1.10589	1.10626	1.10645	1.10646	1.10629	1.10592	1.10535	1.10458	1.1036	1.10242	1.10101	1.09938	1.09752	1.09544	1.09311	1.09054	1.08773	1.08467	1.08135	1.07777	1.07392
5	130	TRUE	80	0.900807	0.89261	0.884081	0.87522	0.866025	0.856494	0.846626	0.836421	0.825879	0.815	0.803783	0.792231	0.780343	0.768122	0.75557	0.742688	0.72948	0.715949	0.702098	0.687931	0.673453	0.658667	0.64358	0.628196	0.612521	0.596562	0.580325	0.563816	0.547043	0.530014	0.512736	0.495218	0.477467	0.459493	0.441305	0.422911	0.404321	0.385544	0.366591	0.34747	0.328192	0.308767	0.289205	0.269516	0.249709	0.229796
0	131	FALSE	20	0.638676	0.640042	0.641411	0.642784	0.644162	0.645547	0.646941	0.648343	0.649757	0.651182	0.652622	0.654076	0.655545	0.657032	0.658538	0.660062	0.661607	0.663174	0.664762	0.666374	0.668011	0.669672	0.671359	0.673072	0.674813	0.676582	0.678379	0.680205	0.682061	0.683947	0.685863	0.687811	0.689789	0.6918	0.693842	0.695916	0.698022	0.700161	0.702332	0.704536	0.706772	0.709041	0.711343	0.713677	0.716043	0.718442
1	131	FALSE	40	5.43286	5.43081	5.42901	5.42745	5.42615	5.42513	5.42438	5.42393	5.42377	5.42393	5.4244	5.42521	5.42635	5.42784	5.42969	5.4319	5.43449	5.43746	5.44081	5.44456	5.44872	5.45329	5.45827	5.46368	5.46951	5.47578	5.48249	5.48964	5.49723	5.50528	5.51377	5.52272	5.53213	5.54199	5.5523	5.56307	5.57429	5.58596	5.59808	5.61064	5.62364	5.63708	5.65094	5.66522	5.67991	5.69501
2	131	FALSE	80	3.04809	3.05523	3.06225	3.06913	3.07589	3.08251	3.08899	3.09533	3.10154	3.10759	3.1135	3.11926	3.12487	3.13033	3.13562	3.14076	3.14573	3.15054	3.15519	3.15966	3.16397	3.1681	3.17205	3.17583	3.17943	3.18286	3.1861	3.18915	3.19203	3.19471	3.19722	3.19953	3.20166	3.2036	3.20535	3.20691	3.20828	3.20946	3.21046	3.21126	3.21188	3.21231	3.21256	3.21262	3.21249	3.21218
3	131	TRUE	20	1.45606	1.46755	1.47869	1.48945	1.49983	1.50983	1.51944	1.52864	1.53744	1.54582	1.55379	1.56133	1.56844	1.57512	1.58137	1.58717	1.59253	1.59744	1.60191	1.60593	1.60949	1.61261	1.61528	1.61749	1.61927	1.62059	1.62148	1.62192	1.62194	1.62152	1.62069	1.61943	1.61777	1.61571	1.61325	1.61042	1.60721	1.60364	1.59971	1.59546	1.59087	1.58598	1.58079	1.57532	1.56958	1.5636
4	131	TRUE	40	-0.349617	-0.348927	-0.348683	-0.348878	-0.349505	-0.350555	-0.352017	-0.353883	-0.356139	-0.358776	-0.36178	-0.365137	-0.368834	-0.372855	-0.377185	-0.381807	-0.386704	-0.391858	-0.39725	-0.402861	-0.408671	-0.414659	-0.420804	-0.427083	-0.433476	-0.439958	-0.446507	-0.453099	-0.459709	-0.466315	-0.472891	-0.479414	-0.485857	-0.492198	-0.49841	-0.50447	-0.510353	-0.516035	-0.521491	-0.5267	-0.531636	-0.536277	-0.540601	-0.544586	-0.54821	-0.551454
5	131	TRUE	80	-2.87905	-2.83561	-2.79161	-2.74707	-2.70202	-2.65646	-2.61043	-2.56394	-2.51701	-2.46968	-2.42195	-2.37386	-2.32543	-2.27669	-2.22765	-2.17834	-2.12879	-2.07902	-2.02906	-1.97894	-1.92867	-1.87829	-1.82782	-1.77729	-1.72673	-1.67616	-1.6256	-1.57509	-1.52464	-1.4743	-1.42407	-1.374	-1.3241	-1.2744	-1.22493	-1.17571	-1.12677	-1.07814	-1.02984	-0.981895	-0.934334	-0.887181	-0.840461	-0.794201	-0.748426	-0.70316
0	132	FALSE	20	4.94983	4.94458	4.93895	4.93294	4.92655	4.91978	4.91263	4.90511	4.8972	4.88892	4.88027	4.87124	4.86183	4.85206	4.84192	4.83141	4.82053	4.80928	4.79768	4.78571	4.77339	4.76071	4.74767	4.73428	4.72054	4.70646	4.69203	4.67726	4.66214	4.64669	4.63091	4.61479	4.59834	4.58157	4.56448	4.54706	4.52933	4.51129	4.49293	4.47427	4.45531	4.43604	4.41648	4.39663	4.37648	4.35605
1	132	FALSE	40	1.46518	1.48259	1.50073	1.51961	1.53921	1.55953	1.58055	1.60225	1.62463	1.64767	1.67135	1.69565	1.72056	1.74605	1.77211	1.7987	1.8258	1.85339	1.88143	1.90989	1.93875	1.96797	1.99751	2.02733	2.05741	2.08769	2.11813	2.1487	2.17934	2.21001	2.24066	2.27124	2.30169	2.33196	2.362	2.39174	2.42113	2.45011	2.47861	2.50657	2.53392	2.5606	2.58653	2.61164	2.63587	2.65914
2	132	FALSE	80	0.630259	0.303631	-0.0295315	-0.369069	-0.71481	-1.06657	-1.42416	-1.78737	-2.15597	-2.52975	-2.90845	-3.29182	-3.67959	-4.07149	-4.46722	-4.86649	-5.26897	-5.67435	-6.08229	-6.49244	-6.90446	-7.31796	-7.73258	-8.14793	-8.56363	-8.97926	-9.39442	-9.8087	-10.2217	-10.6329	-11.042	-11.4484	-11.8519	-12.2518	-12.6478	-13.0394	-13.4263	-13.8078	-14.1837	-14.5534	-14.9166	-15.2727	-15.6215	-15.9624	-16.295	-16.6191
3	132	TRUE	20	-2.91778	-2.99243	-3.06612	-3.1388	-3.21046	-3.28104	-3.35052	-3.41886	-3.48602	-3.55199	-3.61672	-3.68017	-3.74233	-3.80316	-3.86262	-3.92069	-3.97734	-4.03253	-4.08624	-4.13845	-4.18911	-4.23821	-4.28573	-4.33162	-4.37587	-4.41846	-4.45936	-4.49854	-4.53599	-4.57168	-4.6056	-4.63772	-4.66803	-4.69651	-4.72314	-4.74791	-4.7708	-4.79181	-4.81091	-4.8281	-4.84337	-4.85671	-4.86812	-4.87759	-4.88511	-4.89069
4	132	TRUE	40	-1.10231	-1.11143	-1.12014	-1.1284	-1.13619	-1.14347	-1.15022	-1.15641	-1.16201	-1.16698	-1.17131	-1.17495	-1.1779	-1.18011	-1.18156	-1.18223	-1.1821	-1.18113	-1.17931	-1.1766	-1.173	-1.16848	-1.16302	-1.1566	-1.1492	-1.1408	-1.13138	-1.12094	-1.10944	-1.09689	-1.08326	-1.06855	-1.05274	-1.03581	-1.01777	-0.998599	-0.978293	-0.956844	-0.934248	-0.9105	-0.885596	-0.859535	-0.832315	-0.803936	-0.7744	-0.74371
5	132	TRUE	80	4.30149	4.30338	4.30458	4.3051	4.30492	4.30401	4.30236	4.29997	4.2968	4.29286	4.28811	4.28256	4.27618	4.26896	4.26088	4.25195	4.24213	4.23142	4.21981	4.20729	4.19384	4.17945	4.16412	4.14783	4.13057	4.11234	4.09313	4.07293	4.05173	4.02953	4.00632	3.98209	3.95684	3.93057	3.90327	3.87495	3.84559	3.81519	3.78377	3.7513	3.71781	3.68328	3.64772	3.61114	3.57353	3.5349
0	133	FALSE	20	3.34931	3.37217	3.39562	3.41964	3.44424	3.46938	3.49508	3.52129	3.54802	3.57524	3.60294	3.63108	3.65966	3.68863	3.71799	3.7477	3.77773	3.80805	3.83864	3.86945	3.90044	3.93159	3.96286	3.99419	4.02556	4.05691	4.0882	4.11938	4.1504	4.18121	4.21176	4.24199	4.27184	4.30125	4.33017	4.35854	4.38628	4.41333	4.43963	4.46511	4.4897	4.51332	4.5359	4.55737	4.57765	4.59666
1	133	FALSE	40	-10.68	-10.7869	-10.891	-10.9923	-11.0906	-11.1861	-11.2786	-11.368	-11.4545	-11.5378	-11.6181	-11.6952	-11.7691	-11.8399	-11.9074	-11.9717	-12.0328	-12.0905	-12.145	-12.1961	-12.2439	-12.2884	-12.3295	-12.3672	-12.4015	-12.4325	-12.46	-12.4842	-12.5049	-12.5223	-12.5362	-12.5467	-12.5538	-12.5574	-12.5576	-12.5544	-12.5478	-12.5378	-12.5244	-12.5076	-12.4873	-12.4637	-12.4367	-12.4064	-12.3727	-12.3356
2	133	FALSE	80	-0.50126	-0.48437	-0.467595	-0.450935	-0.434391	-0.417962	-0.40165	-0.385454	-0.369374	-0.353411	-0.337565	-0.321834	-0.306219	-0.290721	-0.275337	-0.260068	-0.244914	-0.229873	-0.214945	-0.20013	-0.185427	-0.170835	-0.156353	-0.141981	-0.127718	-0.113562	-0.0995128	-0.0855697	-0.0717316	-0.0579974	-0.0443663	-0.0308372	-0.0174091	-0.00408092	0.00914828	0.0222796	0.0353139	0.0482524	0.0610961	0.0738459	0.0865029	0.099068	0.111542	0.123927	0.136222	0.148429
3	133	TRUE	20	5.50247	5.48526	5.46856	5.45237	5.4367	5.42156	5.40696	5.3929	5.37938	5.36641	5.35399	5.34212	5.3308	5.32002	5.30978	5.30007	5.2909	5.28224	5.2741	5.26646	5.2593	5.25263	5.24641	5.24064	5.23529	5.23036	5.22582	5.22165	5.21782	5.21432	5.21113	5.20821	5.20554	5.2031	5.20086	5.19878	5.19685	5.19503	5.19328	5.19159	5.18991	5.18821	5.18647	5.18465	5.18271	5.18062
4	133	TRUE	40	-3.43385	-3.48211	-3.52982	-3.57696	-3.62353	-3.6695	-3.71487	-3.75961	-3.80372	-3.84718	-3.88998	-3.93212	-3.97359	-4.01437	-4.05446	-4.09386	-4.13255	-4.17054	-4.20781	-4.24437	-4.28022	-4.31535	-4.34976	-4.38345	-4.41642	-4.44868	-4.48023	-4.51107	-4.5412	-4.57064	-4.59938	-4.62744	-4.65482	-4.68153	-4.70758	-4.73298	-4.75775	-4.78188	-4.8054	-4.82832	-4.85066	-4.87242	-4.89362	-4.91428	-4.93442	-4.95405
5	133	TRUE	80	3.50701	3.49429	3.48207	3.47032	3.45904	3.44821	3.43781	3.42783	3.41825	3.40905	3.40022	3.39174	3.3836	3.37577	3.36823	3.36098	3.35399	3.34725	3.34074	3.33444	3.32833	3.3224	3.31664	3.31102	3.30553	3.30015	3.29488	3.28969	3.28457	3.27951	3.2745	3.26952	3.26456	3.25962	3.25467	3.24971	3.24474	3.23974	3.2347	3.22963	3.2245	3.21932	3.21409	3.20879	3.20342	3.19798
0	134	FALSE	20	0.271342	0.277185	0.282911	0.288518	0.294001	0.299356	0.304581	0.30967	0.314621	0.319429	0.324092	0.328604	0.332963	0.337165	0.341205	0.345081	0.348789	0.352325	0.355685	0.358867	0.361866	0.364679	0.367304	0.369737	0.371975	0.374014	0.375853	0.377487	0.378916	0.380135	0.381143	0.381938	0.382517	0.382878	0.38302	0.382941	0.38264	0.382115	0.381366	0.380392	0.379191	0.377765	0.376112	0.374233	0.372128	0.369798
1	134	FALSE	40	-1.02519	-1.05933	-1.09362	-1.12801	-1.1625	-1.19704	-1.23161	-1.26618	-1.30073	-1.33523	-1.36966	-1.40397	-1.43815	-1.47216	-1.50599	-1.53959	-1.57296	-1.60604	-1.63884	-1.6713	-1.70342	-1.73515	-1.76649	-1.7974	-1.82786	-1.85784	-1.88733	-1.91629	-1.94472	-1.97258	-1.99985	-2.02652	-2.05257	-2.07797	-2.1027	-2.12676	-2.15012	-2.17276	-2.19467	-2.21583	-2.23623	-2.25585	-2.27468	-2.2927	-2.30991	-2.32629
2	134	FALSE	80	-1.40514	-1.40235	-1.39954	-1.39669	-1.39381	-1.39089	-1.38794	-1.38495	-1.38193	-1.37887	-1.37577	-1.37264	-1.36946	-1.36625	-1.36299	-1.35969	-1.35635	-1.35297	-1.34954	-1.34606	-1.34254	-1.33897	-1.33536	-1.33169	-1.32798	-1.32422	-1.3204	-1.31654	-1.31262	-1.30865	-1.30462	-1.30054	-1.29641	-1.29222	-1.28797	-1.28366	-1.2793	-1.27488	-1.2704	-1.26586	-1.26126	-1.2566	-1.25188	-1.2471	-1.24225	-1.23734
3	134	TRUE	20	-3.57736	-3.58181	-3.58549	-3.58838	-3.59049	-3.59181	-3.59234	-3.59208	-3.59101	-3.58915	-3.58648	-3.583	-3.57872	-3.57363	-3.56772	-3.561	-3.55347	-3.54512	-3.53595	-3.52596	-3.51515	-3.50352	-3.49107	-3.4778	-3.46371	-3.44879	-3.43306	-3.41651	-3.39914	-3.38095	-3.36195	-3.34213	-3.3215	-3.30007	-3.27783	-3.25479	-3.23094	-3.20631	-3.18088	-3.15467	-3.12768	-3.09992	-3.07139	-3.04209	-3.01205	-2.98126
4	134	TRUE	40	-2.77819	-2.75262	-2.72645	-2.69968	-2.67234	-2.64445	-2.61604	-2.58712	-2.55772	-2.52786	-2.49756	-2.46685	-2.43574	-2.40427	-2.37245	-2.34032	-2.30788	-2.27517	-2.24221	-2.20902	-2.17563	-2.14205	-2.10832	-2.07445	-2.04047	-2.0064	-1.97226	-1.93807	-1.90385	-1.86963	-1.83542	-1.80125	-1.76713	-1.73309	-1.69914	-1.6653	-1.6316	-1.59804	-1.56464	-1.53142	-1.4984	-1.4656	-1.43302	-1.40068	-1.3686	-1.33679
5	134	TRUE	80	-0.141817	-0.138743	-0.135656	-0.132557	-0.129444	-0.126318	-0.123178	-0.120023	-0.116853	-0.113668	-0.110466	-0.107247	-0.104011	-0.100757	-0.0974834	-0.0941908	-0.090878	-0.0875442	-0.0841889	-0.0808112	-0.0774104	-0.0739859	-0.0705368	-0.0670624	-0.0635619	-0.0600348	-0.0564802	-0.0528975	-0.0492859	-0.0456449	-0.0419737	-0.0382718	-0.0345386	-0.0307735	-0.0269759	-0.0231456	-0.0192819	-0.0153845	-0.0114531	-0.0074874	-0.00348715	0.0005478	0.00461755	0.00872212	0.0128615	0.0170355
0	135	FALSE	20	-6.03926	-5.95465	-5.86907	-5.78258	-5.69521	-5.60701	-5.518	-5.42824	-5.33777	-5.24664	-5.15489	-5.06258	-4.96974	-4.87644	-4.78273	-4.68865	-4.59426	-4.49961	-4.40476	-4.30975	-4.21466	-4.11952	-4.0244	-3.92936	-3.83444	-3.7397	-3.64519	-3.55098	-3.45712	-3.36365	-3.27064	-3.17813	-3.08617	-2.99483	-2.90414	-2.81416	-2.72494	-2.63652	-2.54894	-2.46226	-2.37652	-2.29175	-2.208	-2.12531	-2.04372	-1.96325
1	135	FALSE	40	3.36038	3.35592	3.35141	3.34686	3.34227	3.33763	3.33295	3.32822	3.32345	3.31863	3.31377	3.30886	3.30391	3.29891	3.29386	3.28877	3.28363	3.27844	3.27321	3.26793	3.2626	3.25723	3.2518	3.24634	3.24082	3.23526	3.22966	3.224	3.21831	3.21256	3.20677	3.20094	3.19506	3.18914	3.18317	3.17716	3.17111	3.16501	3.15888	3.1527	3.14649	3.14023	3.13394	3.12761	3.12124	3.11483
2	135	FALSE	80	-1.83115	-1.95919	-2.08593	-2.2113	-2.33526	-2.45774	-2.5787	-2.69808	-2.81584	-2.93193	-3.04631	-3.15895	-3.2698	-3.37884	-3.48604	-3.59136	-3.69479	-3.7963	-3.89587	-3.99348	-4.08913	-4.1828	-4.27448	-4.36416	-4.45184	-4.53752	-4.62119	-4.70287	-4.78255	-4.86025	-4.93596	-5.0097	-5.08149	-5.15133	-5.21924	-5.28525	-5.34935	-5.41159	-5.47197	-5.53053	-5.58728	-5.64224	-5.69545	-5.74693	-5.79671	-5.84482
3	135	TRUE	20	1.13363	1.06748	1.0003	0.932112	0.862956	0.792862	0.721863	0.649996	0.577298	0.503807	0.429563	0.354607	0.278981	0.202728	0.125893	0.0485206	-0.0293431	-0.107652	-0.186358	-0.265414	-0.344771	-0.424382	-0.504198	-0.584169	-0.664247	-0.744384	-0.824531	-0.904639	-0.984662	-1.06455	-1.14426	-1.22375	-1.30296	-1.38186	-1.46041	-1.53855	-1.61625	-1.69347	-1.77016	-1.8463	-1.92184	-1.99675	-2.07099	-2.14454	-2.21735	-2.28941
4	135	TRUE	40	0.880532	0.877622	0.874257	0.870423	0.866103	0.861282	0.855945	0.850078	0.843666	0.836697	0.829157	0.821035	0.812319	0.802999	0.793063	0.782503	0.771309	0.759475	0.746992	0.733855	0.720057	0.705594	0.690461	0.674657	0.658179	0.641024	0.623194	0.604688	0.585507	0.565654	0.545133	0.523946	0.502099	0.479599	0.45645	0.432663	0.408243	0.383202	0.35755	0.331296	0.304454	0.277036	0.249056	0.220527	0.191464	0.161884
5	135	TRUE	80	-0.560836	-0.579452	-0.597752	-0.615741	-0.633425	-0.65081	-0.667902	-0.684708	-0.701236	-0.717492	-0.733484	-0.749221	-0.764709	-0.779958	-0.794976	-0.809772	-0.824354	-0.838731	-0.852913	-0.866909	-0.880727	-0.894377	-0.907868	-0.92121	-0.934411	-0.947481	-0.960429	-0.973264	-0.985994	-0.998629	-1.01118	-1.02365	-1.03604	-1.04838	-1.06066	-1.07289	-1.08509	-1.09724	-1.10938	-1.12149	-1.13358	-1.14566	-1.15774	-1.16982	-1.1819	-1.19399
0	136	FALSE	20	-3.07592	-3.04319	-3.00818	-2.97087	-2.93121	-2.88918	-2.84476	-2.79791	-2.74861	-2.69685	-2.6426	-2.58586	-2.5266	-2.46482	-2.40051	-2.33367	-2.26429	-2.19239	-2.11797	-2.04103	-1.96159	-1.87968	-1.7953	-1.70849	-1.61927	-1.52769	-1.43377	-1.33756	-1.2391	-1.13845	-1.03566	-0.930798	-0.823916	-0.715087	-0.604382	-0.491879	-0.377656	-0.2618	-0.144397	-0.0255386	0.0946793	0.216159	0.338797	0.462491	0.587131	0.712608
1	136	FALSE	40	-0.666052	-0.665624	-0.664687	-0.66328	-0.661441	-0.659213	-0.656638	-0.65376	-0.650625	-0.647278	-0.643767	-0.640139	-0.636444	-0.63273	-0.629046	-0.625441	-0.621964	-0.618663	-0.615585	-0.612777	-0.610285	-0.608153	-0.606423	-0.605136	-0.604331	-0.604044	-0.604311	-0.605162	-0.606627	-0.608731	-0.611499	-0.61495	-0.619101	-0.623965	-0.629553	-0.635871	-0.642921	-0.650705	-0.659217	-0.66845	-0.678393	-0.689031	-0.700346	-0.712316	-0.724916	-0.738119
2	136	FALSE	80	-1.411	-1.43554	-1.45956	-1.4831	-1.50617	-1.52882	-1.55108	-1.57298	-1.59455	-1.61582	-1.63685	-1.65765	-1.67826	-1.69873	-1.7191	-1.73939	-1.75966	-1.77994	-1.80028	-1.82071	-1.84128	-1.86203	-1.88302	-1.90428	-1.92585	-1.9478	-1.97015	-1.99296	-2.01628	-2.04016	-2.06463	-2.08976	-2.11558	-2.14215	-2.1695	-2.1977	-2.22677	-2.25678	-2.28776	-2.31975	-2.3528	-2.38695	-2.42223	-2.45868	-2.49634	-2.53523
3	136	TRUE	20	0.943954	1.01848	1.09082	1.16093	1.22875	1.29421	1.35727	1.41788	1.47599	1.53155	1.58452	1.63487	1.68257	1.72757	1.76986	1.8094	1.84618	1.88017	1.91137	1.93976	1.96534	1.9881	2.00804	2.02516	2.03947	2.05098	2.0597	2.06565	2.06885	2.06932	2.06708	2.06217	2.05462	2.04446	2.03173	2.01647	1.99873	1.97855	1.95598	1.93107	1.90388	1.87447	1.84288	1.80919	1.77345	1.73573
4	136	TRUE	40	4.44861	4.45592	4.46239	4.46803	4.47286	4.47687	4.48009	4.48252	4.48417	4.48505	4.48519	4.48458	4.48326	4.48123	4.47851	4.47511	4.47106	4.46638	4.46108	4.45519	4.44871	4.44169	4.43412	4.42604	4.41747	4.40843	4.39893	4.389	4.37867	4.36794	4.35684	4.34539	4.33361	4.32151	4.30912	4.29645	4.28351	4.27032	4.25689	4.24324	4.22937	4.2153	4.20103	4.18658	4.17194	4.15714
5	136	TRUE	80	-3.86519	-3.9745	-4.08057	-4.18329	-4.28253	-4.3782	-4.47019	-4.55841	-4.64276	-4.72315	-4.7995	-4.87173	-4.93977	-5.00354	-5.06298	-5.11803	-5.16864	-5.21475	-5.25634	-5.29335	-5.32575	-5.35352	-5.37663	-5.39506	-5.40881	-5.41786	-5.42222	-5.42188	-5.41686	-5.40716	-5.39282	-5.37384	-5.35026	-5.32212	-5.28944	-5.25228	-5.21067	-5.16468	-5.11436	-5.05977	-5.00097	-4.93803	-4.87102	-4.80003	-4.72514	-4.64641
0	137	FALSE	20	21.158	21.0723	20.9877	20.904	20.8213	20.7395	20.6585	20.5782	20.4987	20.4197	20.3412	20.2631	20.1853	20.1077	20.0303	19.9527	19.8751	19.7972	19.7188	19.64	19.5605	19.4801	19.3989	19.3165	19.2328	19.1478	19.0612	18.9728	18.8826	18.7904	18.6959	18.5991	18.4997	18.3976	18.2926	18.1846	18.0733	17.9587	17.8405	17.7187	17.5929	17.4631	17.3291	17.1907	17.0478	16.9002
1	137	FALSE	40	13.1315	12.9834	12.8391	12.6986	12.5621	12.4295	12.3008	12.1759	12.0549	11.9378	11.8245	11.715	11.6093	11.5073	11.409	11.3144	11.2235	11.1361	11.0523	10.972	10.8951	10.8217	10.7516	10.6848	10.6212	10.5608	10.5035	10.4493	10.3981	10.3497	10.3043	10.2616	10.2216	10.1843	10.1495	10.1173	10.0874	10.06	10.0348	10.0118	9.99096	9.97217	9.95537	9.94047	9.9274	9.91609
2	137	FALSE	80	0.330669	0.136886	-0.0558906	-0.247528	-0.437895	-0.626863	-0.814306	-1.0001	-1.18412	-1.36625	-1.54637	-1.72438	-1.90014	-2.07357	-2.24456	-2.41299	-2.57878	-2.74183	-2.90204	-3.05934	-3.21362	-3.36482	-3.51284	-3.65762	-3.79908	-3.93715	-4.07176	-4.20286	-4.33037	-4.45426	-4.57445	-4.69091	-4.80358	-4.91243	-5.01741	-5.11849	-5.21563	-5.30881	-5.39799	-5.48316	-5.5643	-5.64139	-5.71442	-5.78338	-5.84827	-5.90907
3	137	TRUE	20	-6.48261	-6.55985	-6.63629	-6.71189	-6.78661	-6.86041	-6.93325	-7.00508	-7.07586	-7.14555	-7.21411	-7.28148	-7.34764	-7.41254	-7.47614	-7.53839	-7.59925	-7.65869	-7.71666	-7.77313	-7.82805	-7.88139	-7.93311	-7.98318	-8.03156	-8.07822	-8.12313	-8.16626	-8.20758	-8.24707	-8.2847	-8.32045	-8.35429	-8.38622	-8.41621	-8.44425	-8.47033	-8.49444	-8.51657	-8.53672	-8.55488	-8.57105	-8.58524	-8.59746	-8.60769	-8.61597
4	137	TRUE	40	0.363288	0.408203	0.450304	0.489525	0.525802	0.559073	0.589281	0.616371	0.640291	0.660993	0.67843	0.692562	0.70335	0.710758	0.714754	0.715311	0.712402	0.706008	0.696108	0.68269	0.665742	0.645258	0.621232	0.593665	0.562561	0.527926	0.489771	0.448111	0.402962	0.354347	0.302289	0.246818	0.187966	0.125767	0.0602602	-0.00851204	-0.0805045	-0.155669	-0.233952	-0.315301	-0.399656	-0.486958	-0.577141	-0.67014	-0.765885	-0.864304
5	137	TRUE	80	-11.2911	-11.3096	-11.3272	-11.3437	-11.3591	-11.3735	-11.3869	-11.3991	-11.4103	-11.4204	-11.4294	-11.4372	-11.4439	-11.4495	-11.454	-11.4573	-11.4594	-11.4604	-11.4602	-11.4588	-11.4563	-11.4525	-11.4476	-11.4414	-11.4341	-11.4255	-11.4158	-11.4048	-11.3926	-11.3792	-11.3645	-11.3487	-11.3316	-11.3133	-11.2938	-11.2732	-11.2513	-11.2282	-11.2039	-11.1784	-11.1518	-11.124	-11.095	-11.0649	-11.0336	-11.0013
0	138	FALSE	20	-1.99108	-1.98103	-1.97096	-1.96086	-1.95074	-1.94059	-1.93041	-1.92021	-1.90999	-1.89974	-1.88946	-1.87916	-1.86883	-1.85847	-1.84809	-1.83768	-1.82724	-1.81677	-1.80628	-1.79577	-1.78522	-1.77465	-1.76405	-1.75343	-1.74277	-1.73209	-1.72139	-1.71065	-1.69989	-1.6891	-1.67829	-1.66745	-1.65658	-1.64569	-1.63477	-1.62382	-1.61285	-1.60186	-1.59083	-1.57978	-1.56871	-1.55761	-1.54649	-1.53534	-1.52417	-1.51298
1	138	FALSE	40	0.333899	0.33004	0.326081	0.322047	0.317958	0.313835	0.309698	0.305566	0.301458	0.297391	0.293382	0.289447	0.285601	0.281859	0.278234	0.27474	0.271389	0.268192	0.26516	0.262304	0.259633	0.257156	0.25488	0.252815	0.250966	0.24934	0.247942	0.246778	0.245852	0.245168	0.24473	0.24454	0.244602	0.244916	0.245485	0.246309	0.247388	0.248724	0.250315	0.252161	0.254261	0.256613	0.259216	0.262067	0.265164	0.268505
2	138	FALSE	80	-0.468697	-0.460736	-0.452877	-0.44512	-0.437466	-0.429912	-0.422458	-0.415105	-0.40785	-0.400693	-0.393634	-0.386672	-0.379806	-0.373035	-0.366358	-0.359775	-0.353285	-0.346888	-0.340581	-0.334366	-0.32824	-0.322203	-0.316255	-0.310394	-0.304619	-0.298931	-0.293329	-0.28781	-0.282376	-0.277025	-0.271757	-0.266571	-0.261466	-0.256442	-0.251498	-0.246633	-0.241848	-0.237141	-0.232512	-0.22796	-0.223485	-0.219087	-0.214764	-0.210516	-0.206343	-0.202245
3	138	TRUE	20	-3.78518	-3.78637	-3.78686	-3.78662	-3.78564	-3.7839	-3.78139	-3.77807	-3.77395	-3.76901	-3.76322	-3.75658	-3.74907	-3.74067	-3.73139	-3.7212	-3.7101	-3.69807	-3.68511	-3.67121	-3.65636	-3.64056	-3.6238	-3.60608	-3.5874	-3.56774	-3.54712	-3.52554	-3.50299	-3.47948	-3.45501	-3.42958	-3.40321	-3.3759	-3.34766	-3.3185	-3.28843	-3.25747	-3.22562	-3.1929	-3.15933	-3.12493	-3.08971	-3.0537	-3.01691	-2.97937
4	138	TRUE	40	-0.787471	-0.762161	-0.737056	-0.71217	-0.687516	-0.663108	-0.638957	-0.615075	-0.591474	-0.568164	-0.545154	-0.522456	-0.500078	-0.478027	-0.456313	-0.434942	-0.413922	-0.393257	-0.372955	-0.35302	-0.333456	-0.314268	-0.295458	-0.277031	-0.258987	-0.24133	-0.22406	-0.207178	-0.190685	-0.17458	-0.158864	-0.143534	-0.128591	-0.114031	-0.0998538	-0.0860557	-0.0726342	-0.0595861	-0.0469078	-0.0345955	-0.0226451	-0.0110521	0.000187971	0.0110802	0.0216296	0.0318417
5	138	TRUE	80	0.483445	0.489166	0.4946	0.499758	0.504649	0.509283	0.51367	0.51782	0.521742	0.525446	0.528942	0.532239	0.535347	0.538275	0.541033	0.543629	0.546073	0.548374	0.550541	0.552581	0.554504	0.556318	0.558032	0.559652	0.561187	0.562645	0.564032	0.565356	0.566624	0.567842	0.569018	0.570157	0.571265	0.572348	0.573412	0.574461	0.575502	0.576538	0.577574	0.578615	0.579664	0.580726	0.581803	0.582899	0.584016	0.585159
0	139	FALSE	20	-2.40527	-2.39056	-2.37585	-2.36116	-2.34648	-2.33182	-2.31716	-2.30252	-2.28789	-2.27327	-2.25867	-2.24407	-2.22949	-2.21491	-2.20035	-2.1858	-2.17126	-2.15672	-2.1422	-2.12768	-2.11317	-2.09867	-2.08418	-2.06969	-2.05521	-2.04074	-2.02627	-2.0118	-1.99734	-1.98289	-1.96844	-1.95399	-1.93954	-1.9251	-1.91066	-1.89622	-1.88179	-1.86736	-1.85292	-1.83849	-1.82407	-1.80964	-1.79521	-1.78079	-1.76637	-1.75195
1	139	FALSE	40	-2.09075	-2.09519	-2.09893	-2.10197	-2.10431	-2.10595	-2.1069	-2.10717	-2.10675	-2.10566	-2.10391	-2.10149	-2.09843	-2.09472	-2.09039	-2.08543	-2.07986	-2.07368	-2.06692	-2.05958	-2.05167	-2.04321	-2.0342	-2.02466	-2.0146	-2.00404	-1.99299	-1.98145	-1.96945	-1.95699	-1.9441	-1.93078	-1.91704	-1.9029	-1.88838	-1.87348	-1.85822	-1.84261	-1.82667	-1.8104	-1.79382	-1.77695	-1.75979	-1.74235	-1.72466	-1.70671
2	139	FALSE	80	3.96095	3.93132	3.89941	3.86514	3.82846	3.7893	3.74762	3.70336	3.65647	3.60688	3.55455	3.49944	3.44148	3.38064	3.31687	3.25013	3.18038	3.10757	3.03169	2.95268	2.87053	2.78521	2.69668	2.60494	2.50996	2.41173	2.31023	2.20546	2.09742	1.98611	1.87152	1.75367	1.63257	1.50823	1.38069	1.24995	1.11606	0.979038	0.838936	0.695796	0.549665	0.400598	0.248655	0.0939007	-0.063595	-0.223757
3	139	TRUE	20	0.837671	0.839267	0.840833	0.842369	0.843874	0.845345	0.84678	0.848178	0.849535	0.850849	0.852117	0.853335	0.8545	0.855607	0.856653	0.857633	0.858543	0.859377	0.86013	0.860797	0.861372	0.861848	0.862221	0.862483	0.862628	0.862649	0.862539	0.86229	0.861896	0.861349	0.86064	0.859763	0.858709	0.857469	0.856036	0.854401	0.852555	0.85049	0.848197	0.845668	0.842894	0.839865	0.836573	0.83301	0.829166	0.825032
4	139	TRUE	40	-0.95067	-0.958113	-0.965376	-0.972458	-0.979357	-0.986072	-0.992604	-0.998949	-1.00511	-1.01108	-1.01686	-1.02246	-1.02786	-1.03307	-1.03808	-1.0429	-1.04753	-1.05195	-1.05618	-1.0602	-1.06402	-1.06763	-1.07104	-1.07423	-1.07721	-1.07998	-1.08252	-1.08485	-1.08695	-1.08882	-1.09046	-1.09187	-1.09304	-1.09397	-1.09465	-1.09509	-1.09527	-1.09519	-1.09486	-1.09426	-1.09339	-1.09224	-1.09082	-1.08912	-1.08713	-1.08485
5	139	TRUE	80	-0.287856	-0.297014	-0.305748	-0.314053	-0.321922	-0.329352	-0.336339	-0.342878	-0.348966	-0.3546	-0.359778	-0.364497	-0.368757	-0.372555	-0.375891	-0.378765	-0.381177	-0.383128	-0.384618	-0.385649	-0.386223	-0.386342	-0.386008	-0.385226	-0.383998	-0.38233	-0.380224	-0.377686	-0.374721	-0.371335	-0.367535	-0.363325	-0.358714	-0.353709	-0.348317	-0.342547	-0.336406	-0.329904	-0.323051	-0.315854	-0.308325	-0.300474	-0.292312	-0.283848	-0.275096	-0.266066
0	140	FALSE	20	-6.19854	-6.29863	-6.39781	-6.49593	-6.59281	-6.68829	-6.78221	-6.87439	-6.96468	-7.0529	-7.13889	-7.22248	-7.30353	-7.38185	-7.4573	-7.52972	-7.59895	-7.66485	-7.72725	-7.78602	-7.84102	-7.8921	-7.93913	-7.98197	-8.0205	-8.05459	-8.08413	-8.109	-8.12909	-8.14429	-8.15452	-8.15967	-8.15965	-8.15439	-8.14381	-8.12783	-8.1064	-8.07947	-8.04697	-8.00888	-7.96515	-7.91576	-7.86068	-7.79991	-7.73344	-7.66128
1	140	FALSE	40	6.96127	6.92282	6.88146	6.83726	6.79031	6.74067	6.68843	6.63367	6.57647	6.51692	6.45512	6.39116	6.32513	6.25713	6.18726	6.11564	6.04235	5.96751	5.89123	5.81361	5.73477	5.65482	5.57388	5.49206	5.40947	5.32623	5.24245	5.15826	5.07376	4.98907	4.90431	4.81959	4.73503	4.65072	4.56679	4.48334	4.40047	4.31828	4.23688	4.15637	4.07682	3.99835	3.92102	3.84493	3.77015	3.69676
2	140	FALSE	80	-16.2811	-15.9511	-15.6212	-15.2916	-14.9624	-14.6337	-14.3057	-13.9785	-13.6522	-13.3269	-13.0028	-12.68	-12.3586	-12.0387	-11.7205	-11.404	-11.0893	-10.7766	-10.4659	-10.1574	-9.85107	-9.54711	-9.24558	-8.94656	-8.65013	-8.35637	-8.06536	-7.77716	-7.49186	-7.20951	-6.93018	-6.65393	-6.38081	-6.11088	-5.84419	-5.58078	-5.32069	-5.06398	-4.81066	-4.56079	-4.31438	-4.07146	-3.83207	-3.59621	-3.36391	-3.13517
3	140	TRUE	20	2.04057	2.0844	2.1298	2.17671	2.2251	2.27492	2.32611	2.37862	2.43239	2.48737	2.54348	2.60066	2.65885	2.71797	2.77796	2.83873	2.90022	2.96234	3.02501	3.08815	3.15168	3.21552	3.27957	3.34376	3.40798	3.47215	3.53618	3.59998	3.66346	3.72652	3.78906	3.851	3.91224	3.97268	4.03224	4.09081	4.1483	4.20463	4.25968	4.31339	4.36564	4.41636	4.46544	4.51282	4.55839	4.60208
4	140	TRUE	40	1.93127	1.91273	1.89627	1.88194	1.86975	1.85973	1.85191	1.8463	1.84291	1.84177	1.84287	1.84624	1.85186	1.85974	1.86988	1.88227	1.89691	1.91378	1.93287	1.95416	1.97763	2.00326	2.03102	2.06089	2.09284	2.12683	2.16283	2.20081	2.24071	2.28251	2.32616	2.37161	2.41881	2.46772	2.51829	2.57047	2.62419	2.67942	2.73608	2.79412	2.85349	2.91412	2.97596	3.03893	3.10298	3.16804
5	140	TRUE	80	2.33142	2.36803	2.40234	2.43434	2.46397	2.49122	2.51604	2.53841	2.55831	2.5757	2.59058	2.60292	2.61271	2.61994	2.6246	2.62668	2.62618	2.6231	2.61743	2.60919	2.59837	2.58499	2.56907	2.5506	2.52962	2.50614	2.48018	2.45176	2.42093	2.38769	2.35209	2.31417	2.27395	2.23148	2.18679	2.13994	2.09097	2.03993	1.98686	1.93183	1.87488	1.81607	1.75547	1.69312	1.6291	1.56346
0	142	FALSE	20	-0.0785535	-0.121258	-0.16252	-0.202363	-0.240815	-0.2779	-0.313645	-0.348079	-0.381227	-0.413119	-0.443782	-0.473245	-0.501536	-0.528685	-0.55472	-0.57967	-0.603564	-0.626431	-0.6483	-0.6692	-0.689159	-0.708206	-0.726368	-0.743675	-0.760153	-0.77583	-0.790732	-0.804888	-0.818322	-0.831061	-0.84313	-0.854554	-0.865357	-0.875563	-0.885195	-0.894278	-0.902831	-0.910879	-0.91844	-0.925537	-0.93219	-0.938416	-0.944237	-0.949669	-0.95473	-0.959437
1	142	FALSE	40	13.9749	13.9403	13.9055	13.8705	13.8353	13.8	13.7645	13.7289	13.6931	13.6572	13.6212	13.5851	13.549	13.5127	13.4763	13.4399	13.4035	13.367	13.3304	13.2939	13.2574	13.2209	13.1844	13.148	13.1116	13.0754	13.0392	13.0031	12.9671	12.9313	12.8956	12.8602	12.8249	12.7898	12.7549	12.7203	12.686	12.6519	12.6182	12.5848	12.5517	12.519	12.4866	12.4547	12.4232	12.3921
2	142	FALSE	80	-1.34059	-1.32031	-1.30051	-1.28118	-1.26234	-1.24397	-1.22608	-1.20867	-1.19174	-1.17529	-1.15932	-1.14383	-1.12881	-1.11428	-1.10021	-1.08662	-1.07351	-1.06086	-1.04868	-1.03698	-1.02574	-1.01496	-1.00464	-0.994788	-0.985391	-0.976451	-0.967964	-0.959929	-0.952343	-0.945205	-0.938512	-0.932262	-0.926453	-0.921082	-0.916147	-0.911647	-0.907578	-0.903938	-0.900725	-0.897937	-0.895571	-0.893626	-0.892098	-0.890984	-0.890284	-0.889993
3	142	TRUE	20	-2.19041	-2.17603	-2.16086	-2.14492	-2.12823	-2.11081	-2.09266	-2.07381	-2.05428	-2.0341	-2.01328	-1.99184	-1.96982	-1.94724	-1.92411	-1.90048	-1.87637	-1.85181	-1.82682	-1.80143	-1.77569	-1.74961	-1.72323	-1.69658	-1.66969	-1.64259	-1.61532	-1.58791	-1.56039	-1.5328	-1.50516	-1.47751	-1.44988	-1.42231	-1.39482	-1.36744	-1.34021	-1.31315	-1.2863	-1.25969	-1.23334	-1.20728	-1.18153	-1.15614	-1.13111	-1.10647
4	142	TRUE	40	-4.25739	-4.32682	-4.39405	-4.45901	-4.52166	-4.58194	-4.6398	-4.69519	-4.74808	-4.79841	-4.84615	-4.89124	-4.93365	-4.97335	-5.01029	-5.04445	-5.07579	-5.10427	-5.12988	-5.15257	-5.17234	-5.18915	-5.20299	-5.21384	-5.22168	-5.22649	-5.22827	-5.227	-5.22269	-5.21531	-5.20488	-5.19139	-5.17485	-5.15525	-5.13261	-5.10693	-5.07823	-5.04652	-5.01181	-4.97413	-4.9335	-4.88994	-4.84348	-4.79413	-4.74195	-4.68695
5	142	TRUE	80	-3.53905	-3.54419	-3.549	-3.55347	-3.55758	-3.56133	-3.56471	-3.5677	-3.5703	-3.5725	-3.57429	-3.57567	-3.57662	-3.57716	-3.57727	-3.57694	-3.57619	-3.575	-3.57338	-3.57132	-3.56884	-3.56593	-3.5626	-3.55885	-3.55469	-3.55012	-3.54515	-3.53979	-3.53405	-3.52794	-3.52147	-3.51464	-3.50748	-3.49999	-3.49219	-3.48408	-3.47569	-3.46702	-3.45809	-3.44892	-3.43952	-3.42991	-3.42009	-3.41009	-3.39992	-3.3896
0	143	FALSE	20	0.32865	0.33431	0.33988	0.345361	0.350753	0.356057	0.361272	0.366399	0.371439	0.376392	0.38126	0.386041	0.390738	0.395351	0.39988	0.404327	0.408692	0.412976	0.417181	0.421306	0.425354	0.429326	0.433222	0.437044	0.440793	0.444471	0.448079	0.451618	0.45509	0.458496	0.461838	0.465118	0.468336	0.471495	0.474596	0.477642	0.480632	0.483569	0.486455	0.489291	0.492078	0.494819	0.497514	0.500164	0.502772	0.505339
1	143	FALSE	40	-21.1486	-21.1378	-21.1254	-21.1114	-21.0959	-21.0791	-21.061	-21.0418	-21.0216	-21.0004	-20.9784	-20.9556	-20.9321	-20.908	-20.8835	-20.8585	-20.8332	-20.8076	-20.7819	-20.756	-20.7301	-20.7042	-20.6784	-20.6527	-20.6272	-20.6019	-20.5769	-20.5523	-20.528	-20.5042	-20.4808	-20.4579	-20.4355	-20.4137	-20.3924	-20.3717	-20.3517	-20.3322	-20.3134	-20.2953	-20.2778	-20.2609	-20.2447	-20.2291	-20.2142	-20.1999
2	143	FALSE	80	3.89005	3.89486	3.89977	3.90478	3.9099	3.91513	3.92046	3.92591	3.93147	3.93715	3.94294	3.94885	3.95488	3.96104	3.96731	3.97372	3.98025	3.98691	3.9937	4.00063	4.00769	4.01488	4.02221	4.02969	4.0373	4.04506	4.05296	4.06101	4.0692	4.07755	4.08604	4.09468	4.10348	4.11242	4.12152	4.13078	4.14018	4.14975	4.15946	4.16933	4.17935	4.18953	4.19985	4.21033	4.22095	4.23172
3	143	TRUE	20	3.17131	3.18042	3.1891	3.19732	3.20509	3.21239	3.21922	3.22556	3.23142	3.23677	3.24162	3.24595	3.24976	3.25304	3.25578	3.25798	3.25963	3.26071	3.26124	3.26119	3.26058	3.25938	3.25759	3.25522	3.25225	3.24868	3.24451	3.23974	3.23436	3.22837	3.22177	3.21456	3.20674	3.1983	3.18925	3.17958	3.1693	3.15841	3.14691	3.13481	3.1221	3.10879	3.09489	3.08039	3.06531	3.04964
4	143	TRUE	40	1.30889	1.31675	1.32472	1.33279	1.34095	1.34919	1.35752	1.36592	1.37439	1.38293	1.39152	1.40017	1.40886	1.4176	1.42638	1.4352	1.44406	1.45294	1.46186	1.4708	1.47976	1.48875	1.49776	1.50679	1.51584	1.5249	1.53399	1.5431	1.55222	1.56136	1.57053	1.57971	1.58892	1.59815	1.6074	1.61669	1.626	1.63534	1.64472	1.65414	1.66359	1.67308	1.68262	1.6922	1.70183	1.71151
5	143	TRUE	80	-0.622798	-0.594941	-0.567011	-0.539012	-0.510947	-0.48282	-0.454635	-0.426396	-0.398106	-0.369771	-0.341394	-0.31298	-0.284532	-0.256056	-0.227555	-0.199035	-0.170499	-0.141954	-0.113403	-0.084851	-0.056304	-0.0277667	0.000755749	0.0292579	0.0577345	0.0861799	0.114589	0.142955	0.171273	0.199537	0.227741	0.255879	0.283945	0.311933	0.339836	0.367649	0.395366	0.422979	0.450483	0.477871	0.505138	0.532276	0.559279	0.586142	0.612857	0.639419
0	144	FALSE	20	-2.58126	-2.54774	-2.51477	-2.48236	-2.45052	-2.41927	-2.38859	-2.35849	-2.32898	-2.30004	-2.27167	-2.24385	-2.21659	-2.18986	-2.16365	-2.13794	-2.11271	-2.08795	-2.06362	-2.0397	-2.01617	-1.993	-1.97016	-1.94762	-1.92534	-1.9033	-1.88146	-1.85978	-1.83824	-1.81679	-1.7954	-1.77403	-1.75265	-1.73122	-1.7097	-1.68805	-1.66624	-1.64422	-1.62197	-1.59945	-1.57662	-1.55344	-1.52988	-1.50591	-1.48149	-1.45659
1	144	FALSE	40	0.153666	0.130645	0.108299	0.0866246	0.0656203	0.0452835	0.0256122	0.0066041	-0.0117428	-0.0294305	-0.0464608	-0.0628354	-0.0785561	-0.093624	-0.108041	-0.121807	-0.134923	-0.147391	-0.15921	-0.17038	-0.180901	-0.190774	-0.199996	-0.208567	-0.216486	-0.223751	-0.23036	-0.236311	-0.241601	-0.246227	-0.250187	-0.253475	-0.25609	-0.258026	-0.259279	-0.259844	-0.259717	-0.258891	-0.257362	-0.255123	-0.252169	-0.248492	-0.244087	-0.238946	-0.233064	-0.226432
2	144	FALSE	80	6.91016	6.90758	6.90441	6.90067	6.8964	6.89162	6.88636	6.88065	6.8745	6.86794	6.861	6.8537	6.84607	6.83811	6.82987	6.82135	6.81258	6.80358	6.79435	6.78493	6.77533	6.76556	6.75563	6.74557	6.73538	6.72507	6.71467	6.70416	6.69358	6.68291	6.67217	6.66137	6.65051	6.63959	6.62861	6.61758	6.6065	6.59537	6.58418	6.57293	6.56162	6.55025	6.5388	6.52727	6.51566	6.50395
3	144	TRUE	20	-2.14257	-2.0754	-2.00775	-1.93965	-1.87114	-1.80223	-1.73296	-1.66334	-1.59341	-1.5232	-1.45273	-1.38202	-1.3111	-1.24	-1.16875	-1.09736	-1.02587	-0.954304	-0.88268	-0.811025	-0.739364	-0.667722	-0.59612	-0.524585	-0.453137	-0.3818	-0.310597	-0.239549	-0.16868	-0.0980089	-0.0275588	0.0426497	0.112596	0.182259	0.25162	0.320657	0.389352	0.457684	0.525635	0.593186	0.660317	0.72701	0.793246	0.859008	0.924276	0.989034
4	144	TRUE	40	3.38791	3.37988	3.37133	3.36223	3.35258	3.34236	3.33157	3.32018	3.30819	3.2956	3.28239	3.26856	3.25411	3.23902	3.22331	3.20695	3.18996	3.17234	3.15409	3.1352	3.11569	3.09557	3.07483	3.05349	3.03156	3.00905	2.98598	2.96235	2.93818	2.91349	2.8883	2.86262	2.83648	2.8099	2.7829	2.7555	2.72772	2.6996	2.67116	2.64242	2.61342	2.58418	2.55473	2.5251	2.49531	2.46541
5	144	TRUE	80	0.0902763	0.0598635	0.0295544	-0.00063591	-0.030693	-0.0606027	-0.0903514	-0.119926	-0.149313	-0.1785	-0.207477	-0.236231	-0.264752	-0.29303	-0.321055	-0.348819	-0.376315	-0.403533	-0.430469	-0.457116	-0.48347	-0.509525	-0.53528	-0.56073	-0.585874	-0.610712	-0.635242	-0.659466	-0.683385	-0.707002	-0.730318	-0.753338	-0.776066	-0.798507	-0.820667	-0.842553	-0.86417	-0.885528	-0.906634	-0.927497	-0.948125	-0.968529	-0.988719	-1.0087	-1.0285	-1.04811
0	146	FALSE	20	1.16063	1.16259	1.16448	1.16628	1.16801	1.16966	1.17122	1.17271	1.17411	1.17543	1.17667	1.17783	1.17891	1.1799	1.18081	1.18164	1.18238	1.18304	1.18362	1.18411	1.18453	1.18486	1.18511	1.18528	1.18537	1.18538	1.18531	1.18517	1.18495	1.18465	1.18429	1.18384	1.18333	1.18275	1.1821	1.18138	1.1806	1.17976	1.17885	1.17789	1.17687	1.17579	1.17466	1.17349	1.17226	1.171
1	146	FALSE	40	1.05324	1.04575	1.0388	1.03239	1.02655	1.02126	1.01654	1.01238	1.00879	1.00577	1.00331	1.00141	1.00007	0.999274	0.999024	0.999309	1.00012	1.00144	1.00328	1.0056	1.0084	1.01167	1.01539	1.01955	1.02412	1.0291	1.03447	1.04022	1.04631	1.05274	1.05948	1.06653	1.07385	1.08144	1.08926	1.09731	1.10557	1.11401	1.12262	1.13137	1.14025	1.14925	1.15834	1.1675	1.17672	1.18598
2	146	FALSE	80	3.75914	3.74585	3.73219	3.71816	3.70373	3.68887	3.67356	3.65777	3.64148	3.62467	3.60731	3.58936	3.57082	3.55164	3.53181	3.51129	3.49006	3.4681	3.44537	3.42184	3.3975	3.37231	3.34625	3.31928	3.29138	3.26253	3.2327	3.20185	3.16998	3.13704	3.10301	3.06787	3.0316	2.99416	2.95554	2.91572	2.87466	2.83236	2.78879	2.74392	2.69775	2.65025	2.60141	2.55121	2.49964	2.44668
3	146	TRUE	20	3.15163	3.18383	3.21532	3.24611	3.27619	3.30554	3.33417	3.36206	3.3892	3.4156	3.44125	3.46614	3.49026	3.51362	3.53621	3.55803	3.57907	3.59933	3.61881	3.63751	3.65542	3.67255	3.68889	3.70444	3.7192	3.73317	3.74636	3.75875	3.77035	3.78117	3.79119	3.80043	3.80887	3.81653	3.8234	3.82948	3.83478	3.8393	3.84302	3.84597	3.84814	3.84952	3.85012	3.84995	3.849	3.84727
4	146	TRUE	40	0.521875	0.538144	0.554097	0.569714	0.584979	0.599872	0.614378	0.628479	0.642159	0.655403	0.668193	0.680516	0.692357	0.703703	0.714538	0.724852	0.73463	0.743861	0.752534	0.760638	0.768162	0.775097	0.781433	0.787162	0.792276	0.796766	0.800626	0.80385	0.806432	0.808366	0.809648	0.810274	0.81024	0.809544	0.808183	0.806155	0.80346	0.800097	0.796066	0.791368	0.786005	0.779977	0.773289	0.765943	0.757943	0.749293
5	146	TRUE	80	-2.47236	-2.50239	-2.53125	-2.55891	-2.58538	-2.61064	-2.63468	-2.6575	-2.67908	-2.69943	-2.71854	-2.7364	-2.75304	-2.76843	-2.7826	-2.79555	-2.80728	-2.81781	-2.82715	-2.83531	-2.8423	-2.84814	-2.85286	-2.85646	-2.85897	-2.86042	-2.86081	-2.86018	-2.85855	-2.85595	-2.8524	-2.84793	-2.84257	-2.83634	-2.82928	-2.82141	-2.81276	-2.80336	-2.79324	-2.78243	-2.77096	-2.75887	-2.74616	-2.73289	-2.71907	-2.70473
0	147	FALSE	20	-8.3978	-8.59793	-8.79734	-8.99585	-9.19328	-9.38945	-9.5842	-9.77733	-9.96868	-10.1581	-10.3454	-10.5304	-10.7129	-10.8929	-11.0701	-11.2445	-11.4157	-11.5838	-11.7486	-11.9099	-12.0676	-12.2215	-12.3717	-12.5179	-12.6601	-12.798	-12.9318	-13.0611	-13.186	-13.3063	-13.4221	-13.5331	-13.6393	-13.7408	-13.8373	-13.9288	-14.0153	-14.0968	-14.1731	-14.2444	-14.3104	-14.3712	-14.4268	-14.4772	-14.5223	-14.5621
1	147	FALSE	40	1.78125	1.81548	1.8478	1.87816	1.90648	1.93267	1.95667	1.97841	1.99782	2.01484	2.0294	2.04145	2.05092	2.05776	2.06193	2.06337	2.06205	2.05792	2.05094	2.04109	2.02833	2.01264	1.994	1.97239	1.9478	1.92023	1.88966	1.8561	1.81956	1.78004	1.73756	1.69213	1.64378	1.59253	1.53842	1.48148	1.42175	1.35927	1.2941	1.22627	1.15586	1.08291	1.0075	0.929682	0.849536	0.767132
2	147	FALSE	80	2.11359	2.10818	2.10276	2.09733	2.0919	2.08647	2.08105	2.07564	2.07025	2.06488	2.05953	2.05421	2.04893	2.04368	2.03847	2.03331	2.02819	2.02311	2.01809	2.01313	2.00822	2.00336	1.99857	1.99384	1.98918	1.98458	1.98005	1.97558	1.97119	1.96687	1.96262	1.95845	1.95435	1.95032	1.94638	1.94251	1.93871	1.935	1.93137	1.92781	1.92434	1.92094	1.91763	1.9144	1.91124	1.90817
3	147	TRUE	20	2.39633	2.38699	2.37721	2.36699	2.3563	2.34516	2.33353	2.32142	2.30881	2.2957	2.28208	2.26794	2.25328	2.23808	2.22234	2.20605	2.18922	2.17183	2.15388	2.13537	2.1163	2.09665	2.07644	2.05566	2.03431	2.01239	1.9899	1.96684	1.94322	1.91905	1.89431	1.86903	1.8432	1.81684	1.78994	1.76253	1.7346	1.70616	1.67724	1.64783	1.61796	1.58763	1.55687	1.52567	1.49407	1.46207
4	147	TRUE	40	0.910396	0.845675	0.780856	0.715982	0.6511	0.586259	0.521506	0.456892	0.392468	0.328284	0.264394	0.200851	0.137708	0.0750187	0.0128375	-0.0487814	-0.109784	-0.170115	-0.229722	-0.288551	-0.346548	-0.403661	-0.459838	-0.515028	-0.56918	-0.622245	-0.674175	-0.724923	-0.774443	-0.822691	-0.869623	-0.915198	-0.959376	-1.00212	-1.04339	-1.08316	-1.12138	-1.15804	-1.1931	-1.22653	-1.25832	-1.28843	-1.31686	-1.34357	-1.36857	-1.39182
5	147	TRUE	80	-0.473126	-0.463478	-0.453455	-0.443073	-0.43235	-0.421303	-0.409948	-0.398305	-0.386389	-0.374219	-0.361813	-0.349188	-0.336363	-0.323355	-0.310182	-0.296861	-0.283411	-0.269848	-0.25619	-0.242455	-0.228658	-0.214817	-0.200949	-0.187069	-0.173194	-0.159339	-0.14552	-0.131752	-0.11805	-0.104428	-0.0909007	-0.0774819	-0.0641848	-0.0510225	-0.0380078	-0.025153	-0.0124699	3.00346e-05	0.0123356	0.0244362	0.0363216	0.0479819	0.0594079	0.0705905	0.0815213	0.0921922
0	148	FALSE	20	-3.15169	-3.01937	-2.88934	-2.76165	-2.63633	-2.51343	-2.393	-2.27505	-2.15962	-2.04675	-1.93644	-1.82873	-1.72363	-1.62115	-1.52131	-1.42411	-1.32956	-1.23767	-1.14842	-1.06182	-0.977864	-0.89654	-0.817836	-0.74174	-0.668236	-0.597305	-0.528927	-0.463078	-0.399736	-0.338872	-0.280459	-0.224466	-0.17086	-0.11961	-0.0706791	-0.0240314	0.0203711	0.0625673	0.102597	0.140503	0.176326	0.21011	0.241899	0.271737	0.299671	0.325746
1	148	FALSE	40	2.13238	2.08128	2.02829	1.9734	1.9166	1.85791	1.79731	1.73481	1.67042	1.60414	1.53598	1.46595	1.39406	1.32034	1.24479	1.16743	1.0883	1.0074	0.924764	0.840424	0.754406	0.666742	0.577466	0.486615	0.394225	0.300338	0.204994	0.108238	0.0101147	-0.0893281	-0.190042	-0.291976	-0.395078	-0.499295	-0.604572	-0.710853	-0.818081	-0.926199	-1.03515	-1.14486	-1.25529	-1.36637	-1.47803	-1.59022	-1.70288	-1.81593
2	148	FALSE	80	5.34368	5.33745	5.33149	5.32581	5.3204	5.31527	5.31041	5.30583	5.30152	5.29748	5.29371	5.2902	5.28695	5.28396	5.28123	5.27874	5.2765	5.27449	5.27271	5.27115	5.26981	5.26867	5.26772	5.26696	5.26638	5.26596	5.26569	5.26556	5.26555	5.26566	5.26586	5.26614	5.26648	5.26687	5.26729	5.26772	5.26814	5.26852	5.26886	5.26913	5.2693	5.26935	5.26926	5.26901	5.26856	5.26789
3	148	TRUE	20	-2.56473	-2.52563	-2.4858	-2.44527	-2.40409	-2.3623	-2.31993	-2.27702	-2.23362	-2.18977	-2.14549	-2.10084	-2.05585	-2.01056	-1.96502	-1.91925	-1.87331	-1.82722	-1.78104	-1.73479	-1.68852	-1.64227	-1.59606	-1.54995	-1.50396	-1.45814	-1.41251	-1.36712	-1.32199	-1.27717	-1.23268	-1.18857	-1.14485	-1.10156	-1.05873	-1.01639	-0.974575	-0.933301	-0.892598	-0.852493	-0.813008	-0.774167	-0.735993	-0.698505	-0.661724	-0.625669
4	148	TRUE	40	-3.25699	-3.28093	-3.30392	-3.32596	-3.34705	-3.36718	-3.38635	-3.40457	-3.42182	-3.4381	-3.45343	-3.46778	-3.48118	-3.4936	-3.50507	-3.51557	-3.5251	-3.53368	-3.54131	-3.54797	-3.55369	-3.55845	-3.56228	-3.56515	-3.56709	-3.5681	-3.56818	-3.56733	-3.56557	-3.56289	-3.55931	-3.55482	-3.54945	-3.54318	-3.53604	-3.52802	-3.51914	-3.50941	-3.49884	-3.48743	-3.47519	-3.46214	-3.44829	-3.43366	-3.41824	-3.40206
5	148	TRUE	80	-0.494922	-0.53753	-0.580679	-0.624353	-0.668536	-0.713211	-0.758361	-0.803969	-0.850019	-0.896493	-0.943373	-0.990643	-1.03829	-1.08628	-1.13462	-1.18327	-1.23222	-1.28145	-1.33095	-1.38069	-1.43066	-1.48083	-1.53118	-1.5817	-1.63237	-1.68315	-1.73404	-1.785	-1.83602	-1.88707	-1.93813	-1.98917	-2.04017	-2.0911	-2.14194	-2.19266	-2.24323	-2.29362	-2.34381	-2.39376	-2.44345	-2.49284	-2.54191	-2.59062	-2.63894	-2.68683
0	149	FALSE	20	2.01703	2.00454	1.99206	1.97957	1.96708	1.95459	1.94211	1.92963	1.91715	1.90467	1.8922	1.87974	1.86728	1.85483	1.8424	1.82997	1.81755	1.80515	1.79276	1.78038	1.76803	1.75568	1.74336	1.73105	1.71877	1.70651	1.69427	1.68205	1.66986	1.65769	1.64556	1.63345	1.62137	1.60931	1.5973	1.58531	1.57335	1.56144	1.54955	1.53771	1.5259	1.51412	1.50239	1.4907	1.47905	1.46744
1	149	FALSE	40	3.8563	3.85444	3.85257	3.85071	3.84883	3.84694	3.84503	3.8431	3.84114	3.83914	3.83711	3.83504	3.83292	3.83075	3.82853	3.82625	3.82391	3.82151	3.81904	3.8165	3.81388	3.81119	3.80841	3.80555	3.80261	3.79957	3.79644	3.79322	3.78991	3.78649	3.78297	3.77934	3.77561	3.77177	3.76782	3.76376	3.75958	3.75529	3.75088	3.74634	3.74169	3.73691	3.73201	3.72698	3.72183	3.71654
2	149	FALSE	80	-1.76371	-1.76333	-1.76287	-1.76234	-1.76172	-1.76103	-1.76026	-1.75941	-1.75847	-1.75746	-1.75636	-1.75518	-1.75391	-1.75257	-1.75113	-1.74962	-1.74802	-1.74634	-1.74457	-1.74271	-1.74077	-1.73874	-1.73663	-1.73443	-1.73214	-1.72977	-1.7273	-1.72475	-1.72212	-1.71939	-1.71658	-1.71368	-1.71069	-1.70761	-1.70444	-1.70119	-1.69784	-1.6944	-1.69088	-1.68727	-1.68356	-1.67977	-1.67589	-1.67191	-1.66785	-1.66369
3	149	TRUE	20	-1.18536	-1.20248	-1.21926	-1.23571	-1.25178	-1.26748	-1.28279	-1.29769	-1.31217	-1.32622	-1.33981	-1.35295	-1.36561	-1.37779	-1.38947	-1.40064	-1.4113	-1.42142	-1.43101	-1.44005	-1.44854	-1.45646	-1.46381	-1.47059	-1.47678	-1.48238	-1.48738	-1.49178	-1.49558	-1.49877	-1.50134	-1.5033	-1.50464	-1.50537	-1.50547	-1.50495	-1.5038	-1.50204	-1.49965	-1.49664	-1.49302	-1.48878	-1.48393	-1.47846	-1.47239	-1.46572
4	149	TRUE	40	-0.0378598	-0.0205122	-0.00332044	0.0137052	0.0305547	0.047218	0.0636854	0.0799475	0.0959951	0.111819	0.127411	0.142763	0.157865	0.172711	0.187293	0.201603	0.215635	0.229381	0.242835	0.255991	0.268843	0.281385	0.293612	0.305518	0.317099	0.328351	0.339268	0.349847	0.360083	0.369974	0.379516	0.388705	0.397539	0.406015	0.414131	0.421884	0.429272	0.436294	0.442947	0.449231	0.455143	0.460683	0.465851	0.470644	0.475062	0.479105
5	149	TRUE	80	0.0948617	0.0816292	0.0681697	0.0544861	0.0405818	0.0264602	0.0121255	-0.00241797	-0.0171652	-0.032111	-0.0472497	-0.0625751	-0.0780806	-0.0937593	-0.109604	-0.125606	-0.141758	-0.15805	-0.174474	-0.19102	-0.207678	-0.224437	-0.241287	-0.258216	-0.275212	-0.292263	-0.309357	-0.326481	-0.343621	-0.360763	-0.377895	-0.395001	-0.412067	-0.429078	-0.446019	-0.462874	-0.479628	-0.496266	-0.512771	-0.529128	-0.54532	-0.561332	-0.577146	-0.592748	-0.608121	-0.623249
0	150	FALSE	20	-7.56954	-7.50201	-7.4288	-7.35005	-7.26589	-7.17646	-7.08192	-6.98241	-6.87809	-6.76913	-6.6557	-6.53796	-6.41611	-6.2903	-6.16073	-6.02759	-5.89106	-5.75132	-5.60858	-5.46303	-5.31485	-5.16425	-5.01141	-4.85653	-4.6998	-4.54143	-4.38159	-4.22048	-4.05829	-3.89521	-3.73141	-3.56709	-3.40242	-3.23758	-3.07274	-2.90808	-2.74376	-2.57994	-2.41678	-2.25445	-2.09308	-1.93283	-1.77384	-1.61624	-1.46017	-1.30576
1	150	FALSE	40	-1.74416	-1.74054	-1.73721	-1.73417	-1.73141	-1.72893	-1.72673	-1.72481	-1.72315	-1.72176	-1.72063	-1.71975	-1.71912	-1.71873	-1.71859	-1.71867	-1.71897	-1.7195	-1.72023	-1.72117	-1.72231	-1.72363	-1.72513	-1.7268	-1.72864	-1.73063	-1.73276	-1.73503	-1.73743	-1.73994	-1.74256	-1.74528	-1.74808	-1.75096	-1.75391	-1.7569	-1.75995	-1.76302	-1.76611	-1.76921	-1.77231	-1.77539	-1.77845	-1.78146	-1.78443	-1.78732
2	150	FALSE	80	-2.24766	-2.227	-2.20623	-2.18536	-2.16439	-2.14335	-2.12223	-2.10105	-2.07981	-2.05851	-2.03717	-2.0158	-1.99439	-1.97296	-1.95152	-1.93006	-1.9086	-1.88715	-1.8657	-1.84427	-1.82286	-1.80148	-1.78012	-1.75881	-1.73753	-1.7163	-1.69512	-1.67399	-1.65293	-1.63192	-1.61099	-1.59012	-1.56933	-1.54861	-1.52798	-1.50742	-1.48696	-1.46658	-1.44629	-1.42609	-1.40599	-1.38599	-1.36609	-1.34628	-1.32658	-1.30698
3	150	TRUE	20	4.47087	4.46791	4.46426	4.45992	4.45494	4.44933	4.44313	4.43635	4.42902	4.42116	4.41281	4.40398	4.3947	4.38499	4.37489	4.3644	4.35356	4.34239	4.33091	4.31913	4.30709	4.29481	4.2823	4.26958	4.25668	4.24361	4.23038	4.21702	4.20355	4.18997	4.1763	4.16256	4.14875	4.1349	4.12101	4.10709	4.09314	4.07919	4.06523	4.05127	4.03732	4.02338	4.00945	3.99553	3.98163	3.96774
4	150	TRUE	40	-0.570125	-0.605889	-0.641269	-0.676232	-0.710749	-0.744789	-0.778324	-0.811328	-0.843775	-0.87564	-0.906901	-0.937536	-0.967525	-0.996848	-1.02549	-1.05343	-1.08066	-1.10717	-1.13294	-1.15795	-1.18222	-1.20571	-1.22843	-1.25038	-1.27155	-1.29193	-1.31152	-1.33033	-1.34835	-1.36559	-1.38204	-1.39772	-1.41262	-1.42676	-1.44013	-1.45274	-1.46461	-1.47574	-1.48614	-1.49582	-1.50479	-1.51306	-1.52064	-1.52755	-1.53379	-1.53939
5	150	TRUE	80	-0.21506	-0.170932	-0.127437	-0.0845692	-0.0423265	-0.000704546	0.0403013	0.080696	0.120485	0.159673	0.198268	0.236274	0.273698	0.310547	0.346827	0.382546	0.41771	0.452327	0.486403	0.519945	0.552961	0.585457	0.617441	0.64892	0.6799	0.710389	0.740392	0.769917	0.79897	0.827558	0.855686	0.883361	0.91059	0.937376	0.963728	0.989649	1.01515	1.04022	1.06489	1.08914	1.113	1.13645	1.15951	1.18218	1.20447	1.22637
0	151	FALSE	20	-0.849336	-0.850273	-0.851181	-0.852059	-0.852906	-0.853721	-0.854503	-0.855253	-0.855968	-0.856649	-0.857294	-0.857903	-0.858475	-0.85901	-0.859506	-0.859963	-0.860381	-0.860758	-0.861094	-0.861389	-0.861641	-0.861849	-0.862015	-0.862136	-0.862212	-0.862242	-0.862226	-0.862164	-0.862054	-0.861896	-0.861689	-0.861434	-0.861129	-0.860773	-0.860367	-0.85991	-0.859401	-0.858839	-0.858225	-0.857557	-0.856836	-0.85606	-0.855229	-0.854343	-0.853401	-0.852403
1	151	FALSE	40	1.96041	1.96447	1.96862	1.97284	1.97714	1.98151	1.98594	1.99042	1.99496	1.99953	2.00415	2.0088	2.01347	2.01817	2.02288	2.02761	2.03235	2.03708	2.04182	2.04655	2.05127	2.05598	2.06067	2.06533	2.06997	2.07459	2.07917	2.08371	2.08822	2.09268	2.0971	2.10148	2.1058	2.11007	2.11429	2.11846	2.12256	2.12661	2.13059	2.13451	2.13837	2.14216	2.14588	2.14954	2.15312	2.15664
2	151	FALSE	80	2.07427	2.05338	2.03109	2.00749	1.98266	1.95668	1.92965	1.90164	1.87274	1.84302	1.81257	1.78146	1.74977	1.71758	1.68495	1.65196	1.61867	1.58517	1.5515	1.51774	1.48395	1.45018	1.41651	1.38297	1.34964	1.31656	1.28378	1.25135	1.21931	1.18772	1.15662	1.12604	1.09602	1.06661	1.03783	1.00972	0.982303	0.95562	0.929693	0.904546	0.880203	0.856686	0.834015	0.812208	0.79128	0.771248
3	151	TRUE	20	-3.15746	-3.10468	-3.05084	-2.99596	-2.94007	-2.88319	-2.82534	-2.76654	-2.70681	-2.64619	-2.5847	-2.52236	-2.4592	-2.39525	-2.33053	-2.26509	-2.19894	-2.13211	-2.06465	-1.99656	-1.9279	-1.85868	-1.78893	-1.71869	-1.64799	-1.57686	-1.50533	-1.43342	-1.36117	-1.2886	-1.21575	-1.14264	-1.0693	-0.995766	-0.922055	-0.848197	-0.774218	-0.700143	-0.625999	-0.551809	-0.477597	-0.403387	-0.329201	-0.255061	-0.180988	-0.107003
4	151	TRUE	40	-3.33259	-3.35178	-3.37057	-3.38894	-3.40685	-3.42428	-3.4412	-3.45758	-3.47338	-3.48859	-3.50316	-3.51708	-3.53031	-3.54282	-3.55459	-3.56558	-3.57576	-3.58512	-3.59362	-3.60124	-3.60794	-3.6137	-3.6185	-3.62232	-3.62512	-3.62689	-3.6276	-3.62723	-3.62577	-3.62318	-3.61947	-3.6146	-3.60857	-3.60135	-3.59294	-3.58332	-3.57248	-3.56042	-3.54712	-3.53258	-3.5168	-3.49977	-3.48148	-3.46195	-3.44116	-3.41913
5	151	TRUE	80	5.25055	5.18921	5.12848	5.0684	5.009	4.95029	4.8923	4.83506	4.77858	4.72288	4.66798	4.6139	4.56064	4.50822	4.45665	4.40594	4.3561	4.30712	4.25902	4.21178	4.16543	4.11994	4.07533	4.03158	3.98868	3.94663	3.90542	3.86503	3.82546	3.78668	3.74869	3.71146	3.67498	3.63923	3.60417	3.56981	3.5361	3.50303	3.47056	3.43868	3.40736	3.37657	3.34628	3.31646	3.28709	3.25812
[truncated: 3,454 more columns]

## Sheet: panel B interp + bp
	subject	correct	frequency	0	1	2	3	4	5	6	7	8	9	10	11	12	13	14	15	16	17	18	19	20	21	22	23	24	25	26	27	28	29	30	31	32	33	34	35	36	37	38	39	40	41	42	43	44	45
0	102	FALSE	20	0.14588	0.144296	0.142696	0.141082	0.139453	0.137809	0.136151	0.13448	0.132794	0.131095	0.129383	0.127657	0.12592	0.12417	0.122409	0.120637	0.118854	0.117062	0.115259	0.113447	0.111627	0.109799	0.107964	0.106122	0.104273	0.102419	0.100559	0.0986955	0.0968276	0.0949564	0.0930824	0.0912062	0.0893282	0.0874491	0.0855693	0.0836894	0.0818098	0.0799311	0.0780538	0.0761782	0.0743048	0.0724342	0.0705666	0.0687025	0.0668424	0.0649865
1	102	FALSE	40	-0.188796	-0.187915	-0.187014	-0.186092	-0.18515	-0.18419	-0.183211	-0.182214	-0.181201	-0.180171	-0.179125	-0.178065	-0.17699	-0.175901	-0.174799	-0.173684	-0.172558	-0.171421	-0.170273	-0.169116	-0.16795	-0.166775	-0.165593	-0.164403	-0.163207	-0.162006	-0.160799	-0.159588	-0.158373	-0.157154	-0.155933	-0.15471	-0.153485	-0.152259	-0.151032	-0.149806	-0.14858	-0.147355	-0.146131	-0.144909	-0.143689	-0.142472	-0.141258	-0.140047	-0.13884	-0.137637
2	102	FALSE	80	0.795909	0.789087	0.782306	0.775568	0.768872	0.76222	0.755611	0.749047	0.742527	0.736052	0.729623	0.72324	0.716904	0.710614	0.704372	0.698177	0.692031	0.685933	0.679884	0.673884	0.667935	0.662035	0.656185	0.650386	0.644639	0.638943	0.633298	0.627705	0.622165	0.616677	0.611242	0.60586	0.600531	0.595256	0.590033	0.584865	0.57975	0.57469	0.569683	0.56473	0.559831	0.554987	0.550196	0.545459	0.540776	0.536147
3	102	TRUE	20	-0.389404	-0.38797	-0.38652	-0.385053	-0.383572	-0.382076	-0.380566	-0.379042	-0.377506	-0.375958	-0.374398	-0.372827	-0.371245	-0.369654	-0.368053	-0.366443	-0.364825	-0.363199	-0.361566	-0.359926	-0.35828	-0.356628	-0.354971	-0.353309	-0.351643	-0.349973	-0.348299	-0.346622	-0.344943	-0.343261	-0.341577	-0.339892	-0.338205	-0.336518	-0.33483	-0.333142	-0.331455	-0.329767	-0.32808	-0.326394	-0.324709	-0.323026	-0.321344	-0.319664	-0.317986	-0.31631
4	102	TRUE	40	0.162586	0.161475	0.160344	0.159193	0.158022	0.156833	0.155625	0.1544	0.153157	0.151897	0.150621	0.149329	0.148022	0.1467	0.145364	0.144015	0.142652	0.141277	0.139889	0.13849	0.13708	0.135659	0.134228	0.132788	0.131338	0.129879	0.128411	0.126936	0.125453	0.123963	0.122465	0.120962	0.119451	0.117935	0.116413	0.114885	0.113352	0.111814	0.110272	0.108724	0.107172	0.105615	0.104054	0.102489	0.100919	0.0993458
5	102	TRUE	80	-0.0291571	-0.0320086	-0.0348464	-0.0376704	-0.0404799	-0.0432747	-0.0460544	-0.0488184	-0.0515664	-0.054298	-0.0570127	-0.05971	-0.0623895	-0.0650507	-0.0676932	-0.0703165	-0.07292	-0.0755032	-0.0780657	-0.0806069	-0.0831263	-0.0856234	-0.0880975	-0.0905481	-0.0929748	-0.0953768	-0.0977536	-0.100105	-0.10243	-0.104727	-0.106998	-0.10924	-0.111454	-0.113638	-0.115792	-0.117916	-0.120009	-0.122071	-0.1241	-0.126096	-0.128059	-0.129989	-0.131884	-0.133744	-0.135568	-0.137357
0	103	FALSE	20	0.933429	0.932805	0.932146	0.931454	0.930727	0.929963	0.929164	0.928327	0.927453	0.92654	0.925589	0.924598	0.923566	0.922494	0.921381	0.920225	0.919027	0.917786	0.916501	0.915172	0.913799	0.912381	0.910917	0.909407	0.907851	0.906248	0.904598	0.902901	0.901156	0.899363	0.897522	0.895633	0.893694	0.891707	0.889671	0.887586	0.885451	0.883267	0.881033	0.87875	0.876417	0.874035	0.871604	0.869123	0.866592	0.864013
1	103	FALSE	40	-0.680307	-0.683429	-0.686498	-0.689515	-0.692479	-0.695388	-0.698242	-0.70104	-0.703781	-0.706464	-0.709089	-0.711655	-0.71416	-0.716605	-0.718989	-0.721311	-0.72357	-0.725765	-0.727897	-0.729964	-0.731966	-0.733903	-0.735773	-0.737577	-0.739313	-0.740982	-0.742583	-0.744116	-0.745579	-0.746974	-0.748299	-0.749554	-0.750739	-0.751853	-0.752897	-0.75387	-0.754771	-0.755601	-0.756359	-0.757046	-0.75766	-0.758203	-0.758673	-0.759071	-0.759396	-0.759649
2	103	FALSE	80	-0.150487	-0.153066	-0.155607	-0.158111	-0.160576	-0.163001	-0.165388	-0.167734	-0.17004	-0.172305	-0.174528	-0.17671	-0.17885	-0.180947	-0.183002	-0.185013	-0.186982	-0.188907	-0.190789	-0.192626	-0.19442	-0.19617	-0.197875	-0.199537	-0.201154	-0.202727	-0.204255	-0.205739	-0.207179	-0.208575	-0.209927	-0.211235	-0.212499	-0.213719	-0.214896	-0.216029	-0.21712	-0.218167	-0.219172	-0.220134	-0.221055	-0.221933	-0.22277	-0.223565	-0.22432	-0.225034
3	103	TRUE	20	0.360635	0.357336	0.35403	0.350718	0.347399	0.344074	0.340744	0.337407	0.334065	0.330717	0.327364	0.324006	0.320643	0.317274	0.3139	0.310522	0.307139	0.303751	0.300358	0.296961	0.293559	0.290152	0.286741	0.283325	0.279905	0.276481	0.273052	0.269618	0.26618	0.262738	0.259291	0.25584	0.252384	0.248924	0.24546	0.241991	0.238518	0.235041	0.23156	0.228074	0.224584	0.22109	0.217592	0.214091	0.210585	0.207075
4	103	TRUE	40	0.0991829	0.100699	0.102175	0.103609	0.105002	0.106353	0.107664	0.108933	0.110161	0.111348	0.112494	0.1136	0.114664	0.115687	0.11667	0.117612	0.118514	0.119376	0.120197	0.120978	0.12172	0.122422	0.123084	0.123707	0.124291	0.124836	0.125342	0.12581	0.12624	0.126631	0.126984	0.1273	0.127578	0.127819	0.128023	0.128191	0.128321	0.128416	0.128474	0.128497	0.128484	0.128436	0.128353	0.128235	0.128082	0.127896
5	103	TRUE	80	-0.0849782	-0.0841975	-0.0834369	-0.0826967	-0.0819768	-0.0812774	-0.0805986	-0.0799404	-0.0793028	-0.0786861	-0.07809	-0.0775148	-0.0769603	-0.0764266	-0.0759138	-0.0754217	-0.0749503	-0.0744996	-0.0740696	-0.0736601	-0.0732711	-0.0729026	-0.0725544	-0.0722264	-0.0719185	-0.0716306	-0.0713626	-0.0711143	-0.0708856	-0.0706763	-0.0704863	-0.0703154	-0.0701633	-0.07003	-0.0699151	-0.0698186	-0.0697401	-0.0696795	-0.0696365	-0.0696109	-0.0696024	-0.0696108	-0.0696358	-0.0696771	-0.0697344	-0.0698076
0	104	FALSE	20	-0.334642	-0.332124	-0.329612	-0.327105	-0.324605	-0.322112	-0.319625	-0.317146	-0.314675	-0.312212	-0.309757	-0.307311	-0.304874	-0.302447	-0.30003	-0.297623	-0.295227	-0.292841	-0.290467	-0.288105	-0.285754	-0.283416	-0.28109	-0.278777	-0.276477	-0.274191	-0.271918	-0.26966	-0.267415	-0.265186	-0.262971	-0.260772	-0.258588	-0.25642	-0.254267	-0.252131	-0.250011	-0.247908	-0.245822	-0.243754	-0.241702	-0.239669	-0.237653	-0.235655	-0.233676	-0.231715
1	104	FALSE	40	0.159563	0.15595	0.152365	0.148808	0.145279	0.14178	0.13831	0.13487	0.131461	0.128082	0.124734	0.121417	0.118132	0.114879	0.111659	0.10847	0.105315	0.102192	0.0991031	0.0960471	0.0930246	0.0900357	0.0870806	0.0841593	0.0812719	0.0784186	0.0755992	0.072814	0.0700628	0.0673457	0.0646627	0.0620137	0.0593987	0.0568177	0.0542706	0.0517574	0.0492779	0.0468321	0.0444199	0.0420412	0.0396959	0.037384	0.0351052	0.0328596	0.0306469	0.0284671
2	104	FALSE	80	-0.349086	-0.349327	-0.349551	-0.349755	-0.349941	-0.350106	-0.350251	-0.350374	-0.350476	-0.350554	-0.350609	-0.35064	-0.350647	-0.350628	-0.350584	-0.350514	-0.350417	-0.350293	-0.350142	-0.349963	-0.349756	-0.34952	-0.349256	-0.348962	-0.348639	-0.348287	-0.347904	-0.347492	-0.347049	-0.346576	-0.346073	-0.345539	-0.344974	-0.344379	-0.343753	-0.343097	-0.34241	-0.341692	-0.340944	-0.340165	-0.339357	-0.338518	-0.337649	-0.336751	-0.335823	-0.334865
3	104	TRUE	20	-0.377514	-0.378447	-0.379358	-0.380246	-0.38111	-0.38195	-0.382764	-0.383552	-0.384314	-0.385047	-0.385752	-0.386428	-0.387075	-0.38769	-0.388274	-0.388826	-0.389346	-0.389832	-0.390284	-0.390702	-0.391085	-0.391432	-0.391743	-0.392017	-0.392254	-0.392454	-0.392615	-0.392738	-0.392822	-0.392866	-0.392871	-0.392836	-0.392761	-0.392645	-0.392487	-0.392289	-0.392049	-0.391768	-0.391444	-0.391079	-0.390671	-0.39022	-0.389727	-0.389191	-0.388613	-0.387991
4	104	TRUE	40	0.436559	0.43386	0.431127	0.428359	0.425556	0.42272	0.41985	0.416946	0.414009	0.411039	0.408035	0.405	0.401931	0.398831	0.395699	0.392536	0.389342	0.386117	0.382861	0.379575	0.37626	0.372915	0.369542	0.36614	0.362709	0.359251	0.355765	0.352252	0.348713	0.345147	0.341556	0.337939	0.334297	0.330631	0.326941	0.323227	0.31949	0.31573	0.311948	0.308145	0.30432	0.300474	0.296609	0.292723	0.288819	0.284895
5	104	TRUE	80	-0.309399	-0.310308	-0.31122	-0.312132	-0.313045	-0.313959	-0.314873	-0.315786	-0.316698	-0.317609	-0.318518	-0.319424	-0.320328	-0.321229	-0.322125	-0.323017	-0.323904	-0.324784	-0.325659	-0.326527	-0.327387	-0.328238	-0.329081	-0.329914	-0.330736	-0.331548	-0.332348	-0.333135	-0.333909	-0.334669	-0.335414	-0.336143	-0.336857	-0.337554	-0.338232	-0.338893	-0.339534	-0.340156	-0.340757	-0.341336	-0.341894	-0.342429	-0.342941	-0.343429	-0.343893	-0.344332
0	105	FALSE	20	-0.621656	-0.618021	-0.614398	-0.610786	-0.607187	-0.6036	-0.600025	-0.596461	-0.592908	-0.589367	-0.585837	-0.582319	-0.578811	-0.575314	-0.571828	-0.568352	-0.564887	-0.561432	-0.557987	-0.554552	-0.551128	-0.547713	-0.544307	-0.540912	-0.537526	-0.534149	-0.530782	-0.527424	-0.524076	-0.520737	-0.517408	-0.514088	-0.510777	-0.507476	-0.504185	-0.500903	-0.497631	-0.494369	-0.491117	-0.487876	-0.484645	-0.481424	-0.478215	-0.475016	-0.471829	-0.468653
1	105	FALSE	40	-1.7713	-1.76265	-1.754	-1.74535	-1.7367	-1.72805	-1.7194	-1.71074	-1.70209	-1.69344	-1.6848	-1.67615	-1.66751	-1.65887	-1.65024	-1.64162	-1.63299	-1.62438	-1.61577	-1.60717	-1.59858	-1.59	-1.58143	-1.57286	-1.56431	-1.55577	-1.54725	-1.53873	-1.53023	-1.52174	-1.51327	-1.50481	-1.49637	-1.48795	-1.47954	-1.47115	-1.46278	-1.45442	-1.44609	-1.43777	-1.42948	-1.4212	-1.41295	-1.40471	-1.3965	-1.38831
2	105	FALSE	80	-0.391314	-0.389033	-0.386729	-0.384402	-0.382052	-0.379681	-0.377288	-0.374876	-0.372443	-0.369991	-0.367521	-0.365033	-0.362528	-0.360007	-0.35747	-0.354919	-0.352354	-0.349776	-0.347186	-0.344584	-0.341972	-0.339349	-0.336718	-0.334079	-0.331432	-0.328779	-0.32612	-0.323457	-0.320789	-0.318118	-0.315445	-0.31277	-0.310095	-0.307419	-0.304744	-0.302071	-0.2994	-0.296731	-0.294067	-0.291407	-0.288751	-0.286102	-0.283459	-0.280822	-0.278193	-0.275572
3	105	TRUE	20	-0.809992	-0.807212	-0.804423	-0.801625	-0.798817	-0.795999	-0.793172	-0.790335	-0.787489	-0.784633	-0.781766	-0.77889	-0.776004	-0.773107	-0.7702	-0.767282	-0.764354	-0.761415	-0.758465	-0.755504	-0.752532	-0.749549	-0.746554	-0.743548	-0.74053	-0.737501	-0.73446	-0.731407	-0.728343	-0.725266	-0.722178	-0.719077	-0.715965	-0.71284	-0.709704	-0.706556	-0.703395	-0.700223	-0.697039	-0.693843	-0.690635	-0.687415	-0.684184	-0.680941	-0.677687	-0.674421
4	105	TRUE	40	-0.0816311	-0.0805364	-0.0794467	-0.0783622	-0.0772828	-0.0762087	-0.0751401	-0.074077	-0.0730195	-0.0719678	-0.0709218	-0.0698817	-0.0688476	-0.0678195	-0.0667976	-0.0657819	-0.0647724	-0.0637693	-0.0627725	-0.0617822	-0.0607984	-0.0598211	-0.0588504	-0.0578863	-0.056929	-0.0559783	-0.0550344	-0.0540972	-0.0531669	-0.0522435	-0.0513269	-0.0504172	-0.0495144	-0.0486186	-0.0477297	-0.0468478	-0.045973	-0.0451051	-0.0442442	-0.0433904	-0.0425435	-0.0417037	-0.0408709	-0.0400451	-0.0392262	-0.0384143
5	105	TRUE	80	0.297022	0.297669	0.298313	0.298953	0.299589	0.300221	0.300849	0.301473	0.302092	0.302705	0.303314	0.303916	0.304513	0.305104	0.305689	0.306266	0.306837	0.307401	0.307957	0.308505	0.309045	0.309577	0.3101	0.310614	0.311119	0.311614	0.3121	0.312575	0.31304	0.313494	0.313937	0.314369	0.314789	0.315197	0.315593	0.315976	0.316347	0.316704	0.317049	0.317379	0.317696	0.317998	0.318286	0.318559	0.318818	0.319061
0	106	FALSE	20	0.204354	0.201324	0.198272	0.195201	0.19211	0.189002	0.185877	0.182736	0.179581	0.176413	0.173233	0.170041	0.166841	0.163631	0.160415	0.157191	0.153963	0.150731	0.147496	0.14426	0.141023	0.137786	0.134551	0.131319	0.12809	0.124867	0.12165	0.11844	0.115238	0.112046	0.108865	0.105695	0.102538	0.0993954	0.0962678	0.0931565	0.0900628	0.0869878	0.0839327	0.0808988	0.0778871	0.074899	0.0719356	0.0689981	0.0660878	0.0632059
1	106	FALSE	40	0.574668	0.57571	0.57679	0.577907	0.579061	0.58025	0.581474	0.582731	0.584019	0.585337	0.586684	0.588058	0.589457	0.59088	0.592325	0.59379	0.595273	0.596772	0.598285	0.59981	0.601345	0.602888	0.604435	0.605986	0.607538	0.609088	0.610635	0.612175	0.613707	0.615227	0.616735	0.618226	0.619699	0.621152	0.622583	0.623988	0.625366	0.626714	0.628031	0.629314	0.630562	0.631772	0.632942	0.634072	0.635158	0.636199
2	106	FALSE	80	0.287821	0.290001	0.292243	0.294547	0.296912	0.29934	0.301829	0.30438	0.306993	0.309667	0.312403	0.315201	0.318059	0.320979	0.32396	0.327002	0.330105	0.333269	0.336494	0.339779	0.343124	0.34653	0.349996	0.353521	0.357106	0.36075	0.364453	0.368214	0.372033	0.375909	0.379843	0.383832	0.387878	0.391978	0.396133	0.400341	0.404602	0.408914	0.413277	0.417689	0.422149	0.426656	0.431208	0.435805	0.440443	0.445123
3	106	TRUE	20	0.647497	0.645913	0.644318	0.642713	0.641097	0.63947	0.63783	0.636179	0.634515	0.632838	0.631148	0.629445	0.627729	0.625998	0.624254	0.622496	0.620724	0.618938	0.617137	0.615322	0.613493	0.61165	0.609792	0.607921	0.606036	0.604137	0.602224	0.600298	0.598359	0.596408	0.594443	0.592466	0.590477	0.588477	0.586464	0.584441	0.582407	0.580363	0.578308	0.576244	0.57417	0.572088	0.569997	0.567898	0.565791	0.563678
4	106	TRUE	40	-0.034199	-0.0336611	-0.0330856	-0.0324719	-0.0318199	-0.0311291	-0.0303992	-0.0296297	-0.0288204	-0.0279709	-0.0270809	-0.0261499	-0.0251777	-0.024164	-0.0231085	-0.0220108	-0.0208708	-0.0196882	-0.0184628	-0.0171944	-0.0158828	-0.014528	-0.0131298	-0.0116882	-0.0102031	-0.00867455	-0.00710255	-0.00548718	-0.00382856	-0.00212683	-0.000382168	0.00140519	0.00323498	0.0051069	0.0070206	0.00897569	0.0109717	0.0130083	0.0150848	0.0172007	0.0193555	0.0215484	0.0237789	0.0260461	0.0283495	0.030688
5	106	TRUE	80	-0.012046	-0.00846452	-0.00485157	-0.00120964	0.00245874	0.00615106	0.00986484	0.0135976	0.017347	0.0211106	0.024886	0.0286708	0.0324629	0.03626	0.0400597	0.04386	0.0476586	0.0514535	0.0552427	0.059024	0.0627955	0.0665553	0.0703014	0.074032	0.0777453	0.0814396	0.085113	0.088764	0.0923909	0.095992	0.0995659	0.103111	0.106626	0.110109	0.113559	0.116975	0.120355	0.123698	0.127003	0.130269	0.133494	0.136677	0.139818	0.142916	0.145969	0.148976
0	107	FALSE	20	0.362225	0.359595	0.356948	0.354288	0.351616	0.348935	0.346247	0.343554	0.34086	0.338166	0.335475	0.332789	0.33011	0.327442	0.324786	0.322144	0.319519	0.316913	0.314329	0.311768	0.309232	0.306724	0.304246	0.301799	0.299385	0.297006	0.294664	0.292361	0.290097	0.287875	0.285695	0.28356	0.281469	0.279426	0.277429	0.275481	0.273582	0.271733	0.269934	0.268187	0.266491	0.264848	0.263256	0.261717	0.260231	0.258797
1	107	FALSE	40	0.140916	0.133729	0.1266	0.119525	0.112505	0.105538	0.0986248	0.0917629	0.0849521	0.0781913	0.0714798	0.0648166	0.058201	0.0516321	0.0451091	0.0386311	0.0321973	0.0258069	0.019459	0.013153	0.00688788	0.00066296	-0.00552259	-0.0116695	-0.0177787	-0.0238508	-0.0298867	-0.0358872	-0.0418529	-0.0477847	-0.0536833	-0.0595495	-0.065384	-0.0711876	-0.0769609	-0.0827048	-0.0884199	-0.0941069	-0.0997666	-0.105399	-0.111006	-0.116588	-0.122144	-0.127676	-0.133185	-0.13867
2	107	FALSE	80	-0.42444	-0.418329	-0.412239	-0.406172	-0.400127	-0.394105	-0.388105	-0.382129	-0.376177	-0.370248	-0.364343	-0.358463	-0.352607	-0.346776	-0.34097	-0.33519	-0.329435	-0.323706	-0.318002	-0.312325	-0.306674	-0.30105	-0.295452	-0.289881	-0.284337	-0.27882	-0.27333	-0.267867	-0.262431	-0.257023	-0.251642	-0.246288	-0.240961	-0.235662	-0.23039	-0.225145	-0.219928	-0.214737	-0.209574	-0.204437	-0.199327	-0.194243	-0.189186	-0.184155	-0.17915	-0.174171
3	107	TRUE	20	0.269388	0.265114	0.260833	0.256546	0.252253	0.247956	0.243654	0.239347	0.235036	0.230721	0.226402	0.22208	0.217755	0.213426	0.209094	0.204759	0.200421	0.196079	0.191735	0.187387	0.183036	0.178682	0.174324	0.169962	0.165596	0.161227	0.156853	0.152474	0.148091	0.143704	0.139311	0.134912	0.130509	0.126099	0.121683	0.117262	0.112834	0.108399	0.103957	0.0995088	0.0950533	0.0905905	0.0861205	0.081643	0.0771581	0.0726656
4	107	TRUE	40	-0.473393	-0.471314	-0.469235	-0.467156	-0.465077	-0.462997	-0.460915	-0.458831	-0.456745	-0.454654	-0.45256	-0.450461	-0.448357	-0.446248	-0.444132	-0.442011	-0.439882	-0.437746	-0.435602	-0.433451	-0.431291	-0.429122	-0.426945	-0.424759	-0.422563	-0.420358	-0.418144	-0.41592	-0.413686	-0.411443	-0.40919	-0.406927	-0.404655	-0.402373	-0.400082	-0.397781	-0.395471	-0.393153	-0.390825	-0.38849	-0.386146	-0.383794	-0.381434	-0.379067	-0.376693	-0.374312
5	107	TRUE	80	-0.851521	-0.846356	-0.84116	-0.835932	-0.830675	-0.825388	-0.820072	-0.814728	-0.809357	-0.80396	-0.798538	-0.793091	-0.787621	-0.782128	-0.776613	-0.771077	-0.765522	-0.759948	-0.754357	-0.748748	-0.743124	-0.737486	-0.731834	-0.72617	-0.720494	-0.714808	-0.709113	-0.703409	-0.697699	-0.691982	-0.68626	-0.680533	-0.674804	-0.669072	-0.663339	-0.657606	-0.651873	-0.646142	-0.640413	-0.634687	-0.628964	-0.623247	-0.617534	-0.611828	-0.606129	-0.600437
0	108	FALSE	20	-0.0617165	-0.0643949	-0.0670726	-0.0697479	-0.0724191	-0.0750845	-0.0777423	-0.0803909	-0.0830285	-0.0856535	-0.0882643	-0.0908592	-0.0934368	-0.0959954	-0.0985336	-0.10105	-0.103543	-0.106012	-0.108454	-0.11087	-0.113257	-0.115615	-0.117942	-0.120238	-0.122501	-0.124731	-0.126926	-0.129086	-0.131211	-0.133299	-0.13535	-0.137363	-0.139338	-0.141274	-0.143171	-0.145029	-0.146847	-0.148624	-0.150362	-0.152058	-0.153714	-0.15533	-0.156904	-0.158437	-0.15993	-0.161381
1	108	FALSE	40	1.3516	1.34839	1.34516	1.34193	1.33868	1.33543	1.33216	1.32887	1.32558	1.32227	1.31896	1.31562	1.31228	1.30892	1.30555	1.30217	1.29877	1.29536	1.29193	1.2885	1.28505	1.28159	1.27811	1.27462	1.27112	1.26761	1.26409	1.26055	1.25701	1.25345	1.24989	1.24631	1.24273	1.23913	1.23553	1.23192	1.2283	1.22468	1.22104	1.2174	1.21376	1.21011	1.20645	1.20279	1.19912	1.19545
2	108	FALSE	80	0.949866	0.94644	0.943011	0.939582	0.936152	0.932723	0.929295	0.92587	0.922449	0.919033	0.915622	0.912218	0.908822	0.905434	0.902055	0.898686	0.895328	0.891982	0.888648	0.885327	0.88202	0.878727	0.875449	0.872187	0.868941	0.865711	0.862498	0.859302	0.856124	0.852964	0.849822	0.846698	0.843592	0.840506	0.837438	0.834389	0.831358	0.828346	0.825353	0.822379	0.819422	0.816484	0.813564	0.810662	0.807777	0.804909
3	108	TRUE	20	0.579434	0.577023	0.57461	0.572196	0.569781	0.567364	0.564945	0.562525	0.560102	0.557678	0.55525	0.552821	0.550388	0.547952	0.545512	0.543069	0.540621	0.538169	0.535711	0.533248	0.530779	0.528303	0.525821	0.523331	0.520833	0.518327	0.515811	0.513286	0.510751	0.508205	0.505648	0.503079	0.500497	0.497902	0.495294	0.492671	0.490033	0.48738	0.48471	0.482023	0.479319	0.476598	0.473857	0.471097	0.468318	0.465518
4	108	TRUE	40	0.29183	0.291018	0.290208	0.2894	0.288593	0.28779	0.286988	0.286189	0.285393	0.284599	0.283808	0.283019	0.282233	0.28145	0.280669	0.27989	0.279113	0.278338	0.277564	0.276792	0.276022	0.275251	0.274481	0.273712	0.272941	0.27217	0.271398	0.270623	0.269846	0.269066	0.268283	0.267495	0.266702	0.265904	0.2651	0.264289	0.26347	0.262643	0.261807	0.260961	0.260105	0.259238	0.258359	0.257467	0.256563	0.255644
5	108	TRUE	80	0.49841	0.496174	0.493929	0.491675	0.489412	0.487141	0.484862	0.482575	0.480281	0.47798	0.475672	0.473358	0.471038	0.468712	0.466381	0.464044	0.461704	0.459359	0.45701	0.454657	0.452301	0.449943	0.447582	0.445219	0.442855	0.440489	0.438122	0.435755	0.433388	0.431021	0.428655	0.426291	0.423927	0.421566	0.419207	0.416851	0.414499	0.41215	0.409804	0.407464	0.405128	0.402798	0.400473	0.398154	0.395842	0.393537
0	109	FALSE	20	-0.795234	-0.791637	-0.788027	-0.784402	-0.780763	-0.777109	-0.773441	-0.769756	-0.766057	-0.762341	-0.758609	-0.754861	-0.751097	-0.747316	-0.743519	-0.739705	-0.735875	-0.732028	-0.728165	-0.724286	-0.72039	-0.716479	-0.712552	-0.70861	-0.704652	-0.70068	-0.696693	-0.692692	-0.688677	-0.684648	-0.680607	-0.676553	-0.672487	-0.66841	-0.664321	-0.660222	-0.656113	-0.651994	-0.647867	-0.643731	-0.639587	-0.635435	-0.631277	-0.627113	-0.622943	-0.618768
1	109	FALSE	40	-0.162167	-0.1629	-0.163633	-0.164364	-0.165093	-0.165823	-0.166551	-0.167278	-0.168006	-0.168732	-0.169459	-0.170185	-0.170911	-0.171636	-0.172362	-0.173087	-0.173812	-0.174537	-0.175261	-0.175985	-0.176709	-0.177432	-0.178155	-0.178877	-0.179598	-0.180318	-0.181037	-0.181755	-0.182471	-0.183185	-0.183897	-0.184608	-0.185316	-0.186021	-0.186723	-0.187422	-0.188118	-0.188809	-0.189497	-0.19018	-0.190859	-0.191532	-0.1922	-0.192863	-0.193519	-0.194169
2	109	FALSE	80	-0.173917	-0.174141	-0.174368	-0.174597	-0.174828	-0.17506	-0.175294	-0.175529	-0.175765	-0.176001	-0.176238	-0.176475	-0.176711	-0.176948	-0.177184	-0.177419	-0.177653	-0.177885	-0.178117	-0.178346	-0.178574	-0.1788	-0.179023	-0.179244	-0.179462	-0.179678	-0.17989	-0.180099	-0.180306	-0.180508	-0.180707	-0.180903	-0.181094	-0.181282	-0.181465	-0.181645	-0.18182	-0.18199	-0.182157	-0.182318	-0.182475	-0.182628	-0.182775	-0.182918	-0.183056	-0.183188
3	109	TRUE	20	-0.589663	-0.583488	-0.577321	-0.571163	-0.565016	-0.55888	-0.552757	-0.546647	-0.540553	-0.534475	-0.528414	-0.522371	-0.516349	-0.510347	-0.504367	-0.49841	-0.492478	-0.486571	-0.48069	-0.474837	-0.469012	-0.463217	-0.457453	-0.451721	-0.446022	-0.440357	-0.434726	-0.429132	-0.423574	-0.418054	-0.412573	-0.407131	-0.40173	-0.39637	-0.391052	-0.385777	-0.380546	-0.375359	-0.370217	-0.365122	-0.360072	-0.35507	-0.350115	-0.345209	-0.340351	-0.335543
4	109	TRUE	40	0.0334238	0.031839	0.0302433	0.0286365	0.0270185	0.0253892	0.0237485	0.0220963	0.0204323	0.0187566	0.0170689	0.0153692	0.0136573	0.0119331	0.0101965	0.00844748	0.00668583	0.00491149	0.0031244	0.00132447	-0.000488351	-0.0023141	-0.00415281	-0.00600449	-0.00786914	-0.00974675	-0.0116373	-0.0135407	-0.0154568	-0.0173857	-0.0193271	-0.021281	-0.0232471	-0.0252253	-0.0272155	-0.0292173	-0.0312305	-0.0332548	-0.03529	-0.0373358	-0.0393917	-0.0414575	-0.0435328	-0.0456171	-0.0477101	-0.0498112
5	109	TRUE	80	-0.60057	-0.595941	-0.59132	-0.586709	-0.582108	-0.577515	-0.572932	-0.568357	-0.563792	-0.559235	-0.554688	-0.550148	-0.545618	-0.541095	-0.536581	-0.532074	-0.527575	-0.523084	-0.518599	-0.514122	-0.509651	-0.505186	-0.500728	-0.496275	-0.491828	-0.487385	-0.482948	-0.478514	-0.474084	-0.469658	-0.465235	-0.460814	-0.456396	-0.451979	-0.447563	-0.443148	-0.438734	-0.434319	-0.429903	-0.425486	-0.421067	-0.416646	-0.412222	-0.407794	-0.403363	-0.398927
0	110	FALSE	20	2.08124	2.08111	2.08089	2.08059	2.0802	2.07973	2.07916	2.07851	2.07776	2.07692	2.07599	2.07496	2.07383	2.0726	2.07127	2.06984	2.0683	2.06667	2.06492	2.06306	2.0611	2.05903	2.05684	2.05454	2.05212	2.04959	2.04694	2.04418	2.04129	2.03828	2.03515	2.0319	2.02852	2.02501	2.02138	2.01763	2.01374	2.00972	2.00558	2.0013	1.99689	1.99235	1.98768	1.98287	1.97793	1.97286
1	110	FALSE	40	-0.538627	-0.537269	-0.535891	-0.534493	-0.533074	-0.531634	-0.530171	-0.528687	-0.52718	-0.525649	-0.524094	-0.522515	-0.520911	-0.519283	-0.517629	-0.51595	-0.514245	-0.512514	-0.510758	-0.508975	-0.507165	-0.50533	-0.503468	-0.50158	-0.499666	-0.497725	-0.495759	-0.493767	-0.491749	-0.489706	-0.487638	-0.485544	-0.483427	-0.481284	-0.479118	-0.476929	-0.474715	-0.47248	-0.470221	-0.467941	-0.465639	-0.463315	-0.460972	-0.458608	-0.456224	-0.453822
2	110	FALSE	80	0.891054	0.896629	0.902165	0.907664	0.913124	0.918545	0.923927	0.92927	0.934573	0.939836	0.945059	0.950241	0.955382	0.960481	0.965538	0.970552	0.975523	0.98045	0.985333	0.990171	0.994963	0.999709	1.00441	1.00906	1.01366	1.01822	1.02272	1.02717	1.03157	1.03592	1.04022	1.04446	1.04865	1.05278	1.05685	1.06086	1.06482	1.06872	1.07255	1.07632	1.08003	1.08368	1.08726	1.09077	1.09422	1.09759
3	110	TRUE	20	1.01132	1.01081	1.01027	1.00971	1.00911	1.00849	1.00784	1.00716	1.00646	1.00572	1.00495	1.00415	1.00332	1.00246	1.00156	1.00064	0.99968	0.998689	0.997665	0.996607	0.995515	0.994389	0.993229	0.992034	0.990804	0.989538	0.988237	0.9869	0.985526	0.984117	0.98267	0.981186	0.979665	0.978107	0.976511	0.974876	0.973204	0.971492	0.969742	0.967953	0.966124	0.964256	0.962349	0.960401	0.958412	0.956384
4	110	TRUE	40	1.10605	1.10405	1.10201	1.09994	1.09784	1.09571	1.09354	1.09134	1.08911	1.08684	1.08455	1.08222	1.07986	1.07748	1.07506	1.07261	1.07013	1.06762	1.06509	1.06252	1.05993	1.05731	1.05466	1.05198	1.04928	1.04655	1.04379	1.04101	1.03821	1.03538	1.03252	1.02964	1.02674	1.02381	1.02087	1.0179	1.0149	1.01189	1.00886	1.00581	1.00273	0.999642	0.996532	0.993403	0.990257	0.987094
5	110	TRUE	80	0.950865	0.94969	0.948503	0.947303	0.946091	0.944865	0.943627	0.942375	0.94111	0.939831	0.938538	0.93723	0.935908	0.934571	0.933219	0.931852	0.93047	0.929071	0.927657	0.926226	0.924779	0.923316	0.921835	0.920337	0.918821	0.917288	0.915737	0.914167	0.912579	0.910972	0.909346	0.907701	0.906036	0.904351	0.902645	0.90092	0.899173	0.897406	0.895617	0.893807	0.891975	0.89012	0.888244	0.886345	0.884423	0.882477
0	111	FALSE	20	1.74104	1.73549	1.73002	1.72462	1.7193	1.71406	1.70889	1.70381	1.6988	1.69386	1.68901	1.68423	1.67953	1.6749	1.67035	1.66588	1.66148	1.65715	1.6529	1.64872	1.64461	1.64058	1.63661	1.63272	1.62889	1.62513	1.62144	1.61781	1.61425	1.61075	1.6073	1.60392	1.60059	1.59732	1.59411	1.59094	1.58783	1.58476	1.58174	1.57876	1.57583	1.57293	1.57007	1.56724	1.56445	1.56168
1	111	FALSE	40	1.13203	1.12755	1.12303	1.11846	1.11385	1.1092	1.10451	1.09978	1.09502	1.09023	1.0854	1.08054	1.07566	1.07075	1.06582	1.06086	1.05589	1.05089	1.04589	1.04086	1.03583	1.03078	1.02573	1.02068	1.01561	1.01055	1.00549	1.00043	0.995372	0.990322	0.985281	0.98025	0.975231	0.970226	0.965236	0.960265	0.955312	0.950381	0.945472	0.940588	0.93573	0.930899	0.926097	0.921325	0.916584	0.911877
2	111	FALSE	80	-0.0576979	-0.0575621	-0.0573579	-0.0570847	-0.056742	-0.0563292	-0.055846	-0.0552919	-0.0546665	-0.0539695	-0.0532005	-0.0523592	-0.0514453	-0.0504587	-0.0493991	-0.0482664	-0.0470605	-0.0457812	-0.0444285	-0.0430023	-0.0415028	-0.0399299	-0.0382838	-0.0365644	-0.0347721	-0.032907	-0.0309692	-0.0289592	-0.0268772	-0.0247235	-0.0224986	-0.0202028	-0.0178367	-0.0154007	-0.0128954	-0.0103214	-0.00767941	-0.00497	-0.00219394	0.000648032	0.00355511	0.00652646	0.00956124	0.0126585	0.0158174	0.019037
3	111	TRUE	20	1.16241	1.15729	1.15213	1.14692	1.14167	1.13639	1.13106	1.12569	1.12028	1.11484	1.10936	1.10385	1.0983	1.09271	1.0871	1.08145	1.07577	1.07006	1.06432	1.05855	1.05275	1.04693	1.04108	1.03521	1.02931	1.02339	1.01745	1.01149	1.0055	0.9995	0.993479	0.987441	0.981386	0.975316	0.969232	0.963134	0.957023	0.950901	0.944768	0.938625	0.932474	0.926315	0.92015	0.913979	0.907802	0.901623
4	111	TRUE	40	1.16446	1.16022	1.15595	1.15167	1.14738	1.14307	1.13874	1.13439	1.13003	1.12566	1.12127	1.11686	1.11244	1.10801	1.10356	1.09909	1.09462	1.09013	1.08562	1.0811	1.07658	1.07203	1.06748	1.06292	1.05834	1.05375	1.04916	1.04455	1.03994	1.03532	1.03069	1.02605	1.02141	1.01676	1.01211	1.00745	1.00278	0.998116	0.993444	0.988771	0.984095	0.979417	0.974738	0.970059	0.965379	0.9607
5	111	TRUE	80	1.54271	1.53786	1.53303	1.52821	1.52341	1.51862	1.51384	1.50908	1.50433	1.49959	1.49486	1.49014	1.48544	1.48074	1.47606	1.47138	1.46671	1.46206	1.45741	1.45276	1.44813	1.4435	1.43888	1.43426	1.42965	1.42505	1.42045	1.41586	1.41126	1.40668	1.40209	1.39752	1.39294	1.38836	1.38379	1.37922	1.37465	1.37008	1.36552	1.36095	1.35638	1.35182	1.34725	1.34268	1.33812	1.33355
0	112	FALSE	20	-0.463304	-0.462849	-0.462428	-0.462041	-0.461688	-0.461369	-0.461083	-0.460829	-0.460608	-0.460419	-0.460262	-0.460135	-0.460038	-0.459971	-0.459933	-0.459924	-0.459941	-0.459985	-0.460055	-0.46015	-0.460268	-0.460409	-0.460573	-0.460757	-0.460961	-0.461184	-0.461425	-0.461682	-0.461955	-0.462242	-0.462542	-0.462854	-0.463177	-0.46351	-0.46385	-0.464199	-0.464553	-0.464911	-0.465274	-0.465638	-0.466004	-0.466369	-0.466734	-0.467095	-0.467453	-0.467807
1	112	FALSE	40	-0.71017	-0.706849	-0.703521	-0.700184	-0.696838	-0.693484	-0.690121	-0.686748	-0.683366	-0.679974	-0.676572	-0.67316	-0.669737	-0.666304	-0.662859	-0.659404	-0.655937	-0.652459	-0.648969	-0.645467	-0.641953	-0.638427	-0.634888	-0.631337	-0.627773	-0.624197	-0.620608	-0.617005	-0.61339	-0.609762	-0.606121	-0.602466	-0.598799	-0.595118	-0.591424	-0.587716	-0.583996	-0.580262	-0.576515	-0.572755	-0.568982	-0.565196	-0.561397	-0.557585	-0.55376	-0.549923
2	112	FALSE	80	-0.985569	-0.985257	-0.984898	-0.984491	-0.984036	-0.983534	-0.982983	-0.982385	-0.981738	-0.981044	-0.980302	-0.979513	-0.978676	-0.977791	-0.976859	-0.975879	-0.974851	-0.973777	-0.972655	-0.971486	-0.97027	-0.969006	-0.967696	-0.966339	-0.964935	-0.963485	-0.961988	-0.960445	-0.958855	-0.957219	-0.955537	-0.953809	-0.952035	-0.950216	-0.94835	-0.94644	-0.944484	-0.942484	-0.940438	-0.938348	-0.936213	-0.934033	-0.93181	-0.929543	-0.927232	-0.924878
3	112	TRUE	20	-0.675414	-0.671351	-0.667279	-0.663199	-0.659112	-0.655018	-0.650918	-0.646812	-0.642701	-0.638586	-0.634466	-0.630343	-0.626217	-0.622089	-0.61796	-0.613829	-0.609698	-0.605566	-0.601435	-0.597306	-0.593178	-0.589052	-0.584928	-0.580808	-0.576691	-0.572578	-0.56847	-0.564367	-0.560269	-0.556177	-0.552091	-0.548011	-0.543939	-0.539874	-0.535816	-0.531766	-0.527725	-0.523692	-0.519667	-0.515652	-0.511646	-0.507649	-0.503662	-0.499685	-0.495717	-0.49176
4	112	TRUE	40	0.0197432	0.0207038	0.0216369	0.0225417	0.0234176	0.0242642	0.0250807	0.0258668	0.0266217	0.0273451	0.0280363	0.028695	0.0293206	0.0299127	0.0304709	0.0309948	0.031484	0.0319381	0.032357	0.0327402	0.0330875	0.0333987	0.0336736	0.0339119	0.0341137	0.0342787	0.0344069	0.0344982	0.0345527	0.0345703	0.0345511	0.0344952	0.0344026	0.0342737	0.0341085	0.0339072	0.0336701	0.0333974	0.0330895	0.0327467	0.0323693	0.0319577	0.0315124	0.0310338	0.0305223	0.0299784
5	112	TRUE	80	-0.599144	-0.597184	-0.595191	-0.593165	-0.591107	-0.589017	-0.586897	-0.584745	-0.582563	-0.580352	-0.578112	-0.575843	-0.573547	-0.571224	-0.568874	-0.566499	-0.564098	-0.561673	-0.559225	-0.556754	-0.55426	-0.551746	-0.549211	-0.546656	-0.544082	-0.541489	-0.53888	-0.536253	-0.533611	-0.530954	-0.528282	-0.525597	-0.522899	-0.52019	-0.517469	-0.514738	-0.511997	-0.509247	-0.50649	-0.503725	-0.500953	-0.498176	-0.495394	-0.492607	-0.489816	-0.487023
0	113	FALSE	20	-0.578764	-0.579815	-0.580804	-0.581732	-0.582602	-0.583412	-0.584164	-0.58486	-0.585499	-0.586084	-0.586615	-0.587092	-0.587518	-0.587894	-0.58822	-0.588497	-0.588728	-0.588914	-0.589055	-0.589154	-0.589212	-0.589229	-0.589209	-0.589152	-0.58906	-0.588935	-0.588779	-0.588593	-0.588378	-0.588138	-0.587873	-0.587585	-0.587277	-0.58695	-0.586607	-0.586248	-0.585877	-0.585495	-0.585103	-0.584705	-0.584302	-0.583896	-0.583489	-0.583083	-0.582681	-0.582283
1	113	FALSE	40	-0.783298	-0.779958	-0.776631	-0.773316	-0.770013	-0.766719	-0.763435	-0.760158	-0.756888	-0.753623	-0.750363	-0.747107	-0.743854	-0.740603	-0.737353	-0.734103	-0.730852	-0.727601	-0.724347	-0.721092	-0.717833	-0.714571	-0.711305	-0.708035	-0.704761	-0.701481	-0.698196	-0.694906	-0.691611	-0.68831	-0.685004	-0.681692	-0.678375	-0.675053	-0.671725	-0.668393	-0.665056	-0.661715	-0.658369	-0.65502	-0.651668	-0.648313	-0.644956	-0.641597	-0.638237	-0.634876
2	113	FALSE	80	-1.44203	-1.43657	-1.43114	-1.42573	-1.42034	-1.41498	-1.40965	-1.40434	-1.39906	-1.39381	-1.38859	-1.3834	-1.37823	-1.3731	-1.36799	-1.36291	-1.35787	-1.35285	-1.34787	-1.34292	-1.33799	-1.3331	-1.32824	-1.32341	-1.31861	-1.31384	-1.3091	-1.30439	-1.29971	-1.29506	-1.29044	-1.28584	-1.28128	-1.27675	-1.27224	-1.26776	-1.2633	-1.25887	-1.25447	-1.25009	-1.24574	-1.24141	-1.2371	-1.23282	-1.22855	-1.22431
3	113	TRUE	20	-0.123791	-0.124703	-0.125593	-0.12646	-0.127304	-0.128125	-0.128924	-0.129699	-0.130451	-0.13118	-0.131886	-0.132568	-0.133227	-0.133861	-0.134473	-0.13506	-0.135624	-0.136164	-0.13668	-0.137173	-0.137641	-0.138086	-0.138507	-0.138904	-0.139277	-0.139626	-0.139952	-0.140254	-0.140533	-0.140788	-0.14102	-0.141228	-0.141413	-0.141575	-0.141714	-0.14183	-0.141923	-0.141994	-0.142043	-0.142069	-0.142073	-0.142056	-0.142017	-0.141956	-0.141874	-0.141771
4	113	TRUE	40	-0.460674	-0.456446	-0.452255	-0.448104	-0.443992	-0.439919	-0.435887	-0.431896	-0.427946	-0.424036	-0.420169	-0.416343	-0.412559	-0.408818	-0.40512	-0.401464	-0.397852	-0.394283	-0.390758	-0.387276	-0.383838	-0.380443	-0.377093	-0.373787	-0.370525	-0.367306	-0.364132	-0.361002	-0.357916	-0.354874	-0.351875	-0.348921	-0.346009	-0.343141	-0.340317	-0.337535	-0.334796	-0.3321	-0.329445	-0.326833	-0.324262	-0.321733	-0.319244	-0.316796	-0.314389	-0.312021
5	113	TRUE	80	-0.0263208	-0.0261978	-0.0260897	-0.0259966	-0.0259184	-0.0258549	-0.0258062	-0.0257722	-0.0257528	-0.025748	-0.0257576	-0.0257815	-0.0258196	-0.0258718	-0.025938	-0.026018	-0.0261117	-0.026219	-0.0263395	-0.0264733	-0.02662	-0.0267794	-0.0269515	-0.0271359	-0.0273323	-0.0275407	-0.0277607	-0.027992	-0.0282344	-0.0284876	-0.0287513	-0.0290253	-0.0293092	-0.0296027	-0.0299055	-0.0302174	-0.0305379	-0.0308667	-0.0312036	-0.0315482	-0.0319	-0.0322589	-0.0326244	-0.0329963	-0.033374	-0.0337574
0	114	FALSE	20	1.94739	1.93776	1.92806	1.9183	1.90847	1.89856	1.8886	1.87856	1.86845	1.85828	1.84804	1.83773	1.82735	1.81691	1.80639	1.7958	1.78515	1.77442	1.76362	1.75275	1.74181	1.73079	1.7197	1.70854	1.6973	1.68599	1.6746	1.66313	1.65158	1.63996	1.62826	1.61648	1.60461	1.59267	1.58064	1.56853	1.55634	1.54406	1.5317	1.51925	1.50671	1.49409	1.48138	1.46859	1.4557	1.44273
1	114	FALSE	40	-1.99131	-1.99455	-1.99779	-2.00103	-2.00427	-2.0075	-2.01074	-2.01396	-2.01719	-2.02041	-2.02363	-2.02684	-2.03004	-2.03324	-2.03643	-2.03962	-2.0428	-2.04597	-2.04913	-2.05228	-2.05542	-2.05855	-2.06167	-2.06478	-2.06787	-2.07095	-2.07401	-2.07706	-2.08009	-2.08311	-2.0861	-2.08908	-2.09204	-2.09497	-2.09788	-2.10077	-2.10364	-2.10648	-2.10929	-2.11208	-2.11483	-2.11756	-2.12025	-2.12292	-2.12554	-2.12814
2	114	FALSE	80	1.25983	1.24905	1.23826	1.22745	1.21663	1.2058	1.19497	1.18412	1.17327	1.1624	1.15154	1.14067	1.12979	1.11891	1.10803	1.09715	1.08627	1.07539	1.06452	1.05365	1.04278	1.03193	1.02108	1.01023	0.999404	0.988585	0.97778	0.966989	0.956214	0.945456	0.934717	0.923998	0.913301	0.902628	0.891978	0.881355	0.87076	0.860195	0.84966	0.839158	0.82869	0.818259	0.807865	0.797511	0.787198	0.776928
3	114	TRUE	20	0.0271038	0.0262963	0.0254982	0.0247096	0.0239305	0.0231606	0.0223999	0.0216484	0.0209059	0.0201723	0.0194475	0.0187313	0.0180237	0.0173244	0.0166334	0.0159505	0.0152754	0.0146081	0.0139483	0.0132959	0.0126507	0.0120124	0.0113809	0.0107559	0.0101371	0.0095244	0.00891747	0.00831604	0.00771985	0.00712861	0.00654203	0.0059598	0.00538162	0.00480715	0.00423609	0.0036681	0.00310283	0.00253996	0.00197912	0.00141997	0.000862155	0.000305319	-0.000250894	-0.000806841	-0.00136288	-0.00191936
4	114	TRUE	40	0.426156	0.424446	0.422723	0.420986	0.419237	0.417476	0.415702	0.413917	0.412121	0.410314	0.408497	0.40667	0.404833	0.402988	0.401134	0.399272	0.397402	0.395525	0.393642	0.391753	0.389859	0.38796	0.386056	0.384149	0.382238	0.380324	0.378409	0.376492	0.374573	0.372655	0.370737	0.368819	0.366902	0.364988	0.363076	0.361167	0.359261	0.35736	0.355463	0.353572	0.351687	0.349807	0.347935	0.346071	0.344214	0.342366
5	114	TRUE	80	-0.0295363	-0.0308664	-0.0322081	-0.0335606	-0.0349233	-0.0362957	-0.0376771	-0.039067	-0.0404648	-0.0418698	-0.0432815	-0.0446993	-0.0461227	-0.0475511	-0.0489839	-0.0504206	-0.0518607	-0.0533036	-0.0547488	-0.0561958	-0.0576441	-0.0590933	-0.0605429	-0.0619923	-0.0634413	-0.0648892	-0.0663358	-0.0677806	-0.0692233	-0.0706634	-0.0721005	-0.0735345	-0.0749648	-0.0763911	-0.0778133	-0.0792308	-0.0806435	-0.0820511	-0.0834532	-0.0848496	-0.08624	-0.0876242	-0.0890019	-0.0903729	-0.0917369	-0.0930937
0	115	FALSE	20	0.0876492	0.0878177	0.0879123	0.0879341	0.0878841	0.0877635	0.0875733	0.0873149	0.0869892	0.0865976	0.0861413	0.0856215	0.0850394	0.0843965	0.0836938	0.0829328	0.0821148	0.081241	0.0803129	0.0793317	0.0782989	0.0772156	0.0760834	0.0749036	0.0736774	0.0724063	0.0710916	0.0697346	0.0683367	0.0668991	0.0654233	0.0639106	0.0623621	0.0607792	0.0591632	0.0575153	0.0558368	0.0541289	0.0523927	0.0506294	0.0488403	0.0470264	0.0451889	0.0433288	0.0414472	0.0395452
1	115	FALSE	40	-0.251012	-0.251763	-0.252466	-0.253123	-0.253734	-0.2543	-0.254819	-0.255294	-0.255723	-0.256109	-0.25645	-0.256748	-0.257003	-0.257216	-0.257387	-0.257516	-0.257605	-0.257654	-0.257663	-0.257634	-0.257566	-0.257462	-0.25732	-0.257143	-0.256932	-0.256686	-0.256406	-0.256095	-0.255751	-0.255377	-0.254974	-0.254541	-0.254081	-0.253594	-0.253081	-0.252544	-0.251982	-0.251397	-0.250791	-0.250164	-0.249517	-0.248852	-0.248169	-0.247469	-0.246753	-0.246023
2	115	FALSE	80	-0.276853	-0.278484	-0.280144	-0.281832	-0.283546	-0.285286	-0.287052	-0.288843	-0.290658	-0.292497	-0.294358	-0.296242	-0.298147	-0.300073	-0.30202	-0.303985	-0.30597	-0.307973	-0.309994	-0.312031	-0.314085	-0.316154	-0.318239	-0.320338	-0.322451	-0.324577	-0.326716	-0.328867	-0.33103	-0.333204	-0.335388	-0.337582	-0.339786	-0.341999	-0.34422	-0.346449	-0.348685	-0.350929	-0.353179	-0.355434	-0.357696	-0.359962	-0.362232	-0.364507	-0.366784	-0.369065
3	115	TRUE	20	0.185352	0.18396	0.182588	0.181236	0.179904	0.178592	0.177301	0.17603	0.174781	0.173551	0.172343	0.171156	0.169989	0.168844	0.167719	0.166615	0.165532	0.16447	0.163428	0.162407	0.161405	0.160424	0.159463	0.158521	0.157598	0.156695	0.15581	0.154944	0.154096	0.153265	0.152452	0.151656	0.150877	0.150114	0.149367	0.148636	0.147919	0.147217	0.146529	0.145855	0.145194	0.144545	0.143909	0.143285	0.142672	0.14207
4	115	TRUE	40	0.0618466	0.0663883	0.0709151	0.0754264	0.0799218	0.0844006	0.0888622	0.0933061	0.0977315	0.102138	0.106525	0.110891	0.115237	0.119561	0.123863	0.128142	0.132398	0.136629	0.140835	0.145016	0.14917	0.153297	0.157396	0.161468	0.165509	0.169522	0.173503	0.177453	0.181372	0.185257	0.189109	0.192927	0.19671	0.200458	0.204169	0.207844	0.211481	0.215079	0.218638	0.222157	0.225636	0.229073	0.232468	0.23582	0.239129	0.242393
5	115	TRUE	80	0.577118	0.571214	0.565296	0.559365	0.553423	0.547469	0.541506	0.535535	0.529556	0.523571	0.51758	0.511584	0.505585	0.499584	0.493581	0.487577	0.481574	0.475572	0.469573	0.463576	0.457584	0.451596	0.445615	0.43964	0.433672	0.427712	0.421762	0.415821	0.409891	0.403972	0.398064	0.39217	0.386288	0.380421	0.374568	0.36873	0.362908	0.357102	0.351314	0.345542	0.339789	0.334053	0.328337	0.32264	0.316963	0.311306
0	116	FALSE	20	-1.24757	-1.24109	-1.23457	-1.22801	-1.22142	-1.21479	-1.20812	-1.20142	-1.19468	-1.1879	-1.18109	-1.17425	-1.16737	-1.16045	-1.1535	-1.14652	-1.13951	-1.13246	-1.12538	-1.11827	-1.11113	-1.10396	-1.09676	-1.08953	-1.08227	-1.07499	-1.06768	-1.06035	-1.05299	-1.04561	-1.03821	-1.03078	-1.02334	-1.01588	-1.0084	-1.0009	-0.993387	-0.98586	-0.978321	-0.970769	-0.963206	-0.955635	-0.948054	-0.940467	-0.932874	-0.925277
1	116	FALSE	40	0.0577988	0.0600434	0.0622358	0.0643765	0.0664659	0.0685043	0.0704922	0.0724298	0.0743176	0.0761559	0.0779449	0.0796849	0.0813763	0.0830192	0.0846139	0.0861606	0.0876596	0.0891111	0.0905152	0.0918722	0.0931822	0.0944455	0.0956623	0.0968328	0.0979573	0.0990358	0.100069	0.101056	0.101999	0.102897	0.10375	0.104559	0.105324	0.106046	0.106725	0.10736	0.107953	0.108505	0.109014	0.109483	0.109911	0.110299	0.110646	0.110955	0.111225	0.111457
2	116	FALSE	80	-0.662165	-0.66088	-0.65957	-0.658234	-0.656871	-0.655483	-0.654069	-0.652629	-0.651163	-0.649672	-0.648155	-0.646613	-0.645046	-0.643453	-0.641836	-0.640193	-0.638526	-0.636834	-0.635118	-0.633377	-0.631613	-0.629825	-0.628014	-0.62618	-0.624322	-0.622443	-0.620541	-0.618617	-0.616672	-0.614705	-0.612718	-0.610711	-0.608684	-0.606637	-0.604572	-0.602488	-0.600386	-0.598266	-0.59613	-0.593978	-0.591809	-0.589626	-0.587428	-0.585215	-0.582989	-0.580751
3	116	TRUE	20	-0.0265477	-0.0249677	-0.0234127	-0.0218833	-0.0203795	-0.0189017	-0.0174501	-0.0160251	-0.0146267	-0.0132553	-0.011911	-0.0105941	-0.00930475	-0.00804308	-0.00680928	-0.00560348	-0.00442582	-0.00327641	-0.00215534	-0.00106268	1.47849e-06	0.0010371	0.00204416	0.00302262	0.00397249	0.00489378	0.00578651	0.00665073	0.00748649	0.00829386	0.00907294	0.00982382	0.0105466	0.0112415	0.0119086	0.012548	0.01316	0.0137448	0.0143025	0.0148334	0.0153378	0.0158159	0.016268	0.0166944	0.0170954	0.0174714
4	116	TRUE	40	0.145583	0.144919	0.144254	0.143589	0.142922	0.142254	0.141585	0.140916	0.140244	0.139572	0.138898	0.138223	0.137546	0.136868	0.136188	0.135507	0.134824	0.13414	0.133454	0.132766	0.132077	0.131386	0.130694	0.13	0.129304	0.128607	0.127909	0.127209	0.126507	0.125804	0.125101	0.124395	0.123689	0.122982	0.122273	0.121564	0.120854	0.120143	0.119432	0.118719	0.118007	0.117294	0.116581	0.115867	0.115154	0.11444
5	116	TRUE	80	0.231456	0.229086	0.226707	0.22432	0.221926	0.219526	0.217118	0.214705	0.212287	0.209863	0.207435	0.205003	0.202567	0.200128	0.197686	0.195242	0.192796	0.190349	0.187902	0.185453	0.183005	0.180558	0.178111	0.175665	0.173222	0.17078	0.168342	0.165906	0.163474	0.161045	0.158621	0.156201	0.153786	0.151377	0.148973	0.146575	0.144183	0.141799	0.139421	0.13705	0.134688	0.132333	0.129986	0.127648	0.125318	0.122998
0	117	FALSE	20	0.221374	0.219235	0.217097	0.214962	0.212828	0.210698	0.20857	0.206446	0.204326	0.20221	0.200099	0.197994	0.195895	0.193802	0.191716	0.189639	0.187569	0.185509	0.183458	0.181418	0.179389	0.177373	0.175368	0.173378	0.171402	0.169441	0.167496	0.165568	0.163657	0.161766	0.159894	0.158043	0.156213	0.154406	0.152622	0.150863	0.149129	0.147422	0.145743	0.144092	0.14247	0.14088	0.13932	0.137794	0.1363	0.134842
1	117	FALSE	40	0.0710634	0.0702535	0.0694036	0.0685137	0.0675836	0.0666131	0.0656023	0.0645509	0.0634588	0.062326	0.0611524	0.059938	0.0586826	0.0573862	0.0560488	0.0546704	0.0532509	0.0517904	0.0502888	0.0487462	0.0471627	0.0455383	0.043873	0.042167	0.0404204	0.0386332	0.0368057	0.0349379	0.0330301	0.0310824	0.0290951	0.0270683	0.0250023	0.0228973	0.0207537	0.0185717	0.0163515	0.0140937	0.0117983	0.00946591	0.00709673	0.00469115	0.00224955	-0.00022769	-0.00274018	-0.00528752
2	117	FALSE	80	-0.178503	-0.175029	-0.171584	-0.168169	-0.164785	-0.161433	-0.158112	-0.154824	-0.15157	-0.148349	-0.145163	-0.142011	-0.138895	-0.135814	-0.132769	-0.129761	-0.12679	-0.123856	-0.12096	-0.118102	-0.115282	-0.1125	-0.109758	-0.107054	-0.104389	-0.101764	-0.0991783	-0.0966322	-0.0941257	-0.0916591	-0.0892322	-0.0868452	-0.084498	-0.0821907	-0.0799231	-0.0776951	-0.0755067	-0.0733576	-0.0712478	-0.0691771	-0.0671452	-0.0651518	-0.0631967	-0.0612796	-0.0594002	-0.0575581
3	117	TRUE	20	0.0267169	0.0259526	0.0251845	0.0244125	0.0236369	0.0228577	0.022075	0.021289	0.0204998	0.0197075	0.0189122	0.018114	0.0173132	0.0165097	0.0157038	0.0148956	0.0140853	0.013273	0.0124589	0.0116431	0.0108259	0.0100073	0.00918774	0.00836724	0.00754605	0.0067244	0.0059025	0.00508057	0.00425886	0.0034376	0.00261705	0.00179745	0.000979075	0.00016219	-0.000652927	-0.00146599	-0.00227671	-0.00308477	-0.00388988	-0.00469171	-0.00548993	-0.00628421	-0.00707421	-0.00785955	-0.00863988	-0.00941482
4	117	TRUE	40	0.592934	0.591651	0.590389	0.589149	0.587931	0.586735	0.585561	0.584408	0.583277	0.582166	0.581077	0.580009	0.578961	0.577934	0.576927	0.57594	0.574973	0.574024	0.573095	0.572184	0.571291	0.570416	0.569558	0.568717	0.567893	0.567084	0.56629	0.565511	0.564746	0.563994	0.563256	0.562529	0.561814	0.56111	0.560415	0.559731	0.559054	0.558386	0.557725	0.55707	0.556421	0.555777	0.555136	0.554499	0.553863	0.55323
5	117	TRUE	80	-0.498675	-0.498674	-0.498653	-0.498614	-0.498555	-0.498477	-0.498381	-0.498266	-0.498132	-0.49798	-0.49781	-0.497622	-0.497416	-0.497192	-0.496951	-0.496692	-0.496416	-0.496123	-0.495813	-0.495485	-0.495142	-0.494781	-0.494404	-0.494011	-0.493601	-0.493176	-0.492734	-0.492277	-0.491804	-0.491315	-0.490811	-0.490291	-0.489756	-0.489206	-0.488641	-0.488061	-0.487466	-0.486857	-0.486233	-0.485595	-0.484942	-0.484276	-0.483595	-0.4829	-0.482192	-0.48147
0	118	FALSE	20	-0.364693	-0.357446	-0.350243	-0.343087	-0.33598	-0.328923	-0.321918	-0.314969	-0.308075	-0.30124	-0.294465	-0.287753	-0.281104	-0.274522	-0.268007	-0.261562	-0.255188	-0.248888	-0.242662	-0.236513	-0.230443	-0.224452	-0.218543	-0.212718	-0.206977	-0.201322	-0.195754	-0.190276	-0.184887	-0.17959	-0.174386	-0.169275	-0.164258	-0.159338	-0.154513	-0.149786	-0.145157	-0.140626	-0.136194	-0.131861	-0.127628	-0.123495	-0.119462	-0.115529	-0.111696	-0.107963
1	118	FALSE	40	-3.34195	-3.33371	-3.32543	-3.31712	-3.30876	-3.30038	-3.29195	-3.28349	-3.27498	-3.26644	-3.25786	-3.24924	-3.24058	-3.23188	-3.22314	-3.21436	-3.20553	-3.19667	-3.18776	-3.17881	-3.16981	-3.16077	-3.15169	-3.14257	-3.1334	-3.12418	-3.11492	-3.10562	-3.09627	-3.08687	-3.07743	-3.06794	-3.0584	-3.04882	-3.03919	-3.02951	-3.01979	-3.01002	-3.0002	-2.99033	-2.98041	-2.97045	-2.96044	-2.95037	-2.94026	-2.9301
2	118	FALSE	80	-1.73848	-1.73401	-1.72949	-1.72491	-1.72027	-1.71559	-1.71085	-1.70605	-1.7012	-1.69631	-1.69136	-1.68635	-1.6813	-1.6762	-1.67105	-1.66585	-1.66061	-1.65531	-1.64997	-1.64458	-1.63915	-1.63367	-1.62814	-1.62257	-1.61696	-1.6113	-1.6056	-1.59986	-1.59407	-1.58824	-1.58237	-1.57646	-1.5705	-1.56451	-1.55847	-1.5524	-1.54628	-1.54013	-1.53393	-1.52769	-1.52142	-1.51511	-1.50875	-1.50236	-1.49593	-1.48946
3	118	TRUE	20	0.100024	0.098596	0.0971442	0.0956683	0.0941683	0.0926442	0.0910963	0.0895247	0.0879293	0.0863105	0.0846684	0.0830031	0.0813147	0.0796035	0.0778697	0.0761134	0.0743348	0.0725342	0.0707118	0.0688678	0.0670024	0.0651159	0.0632086	0.0612808	0.0593326	0.0573644	0.0553764	0.0533691	0.0513427	0.0492975	0.0472338	0.045152	0.0430525	0.0409356	0.0388017	0.0366511	0.0344842	0.0323015	0.0301033	0.0278901	0.0256622	0.0234202	0.0211643	0.0188951	0.016613	0.0143184
4	118	TRUE	40	-0.383463	-0.387369	-0.391268	-0.395158	-0.399039	-0.402911	-0.406772	-0.410622	-0.414459	-0.418284	-0.422095	-0.425892	-0.429673	-0.433439	-0.437188	-0.440919	-0.444632	-0.448326	-0.452001	-0.455655	-0.459288	-0.462898	-0.466486	-0.470051	-0.473591	-0.477107	-0.480597	-0.48406	-0.487497	-0.490906	-0.494287	-0.497639	-0.500961	-0.504253	-0.507515	-0.510745	-0.513943	-0.517109	-0.520242	-0.523341	-0.526407	-0.529438	-0.532434	-0.535394	-0.538319	-0.541208
5	118	TRUE	80	-0.123661	-0.125504	-0.127313	-0.129089	-0.13083	-0.132538	-0.134212	-0.135851	-0.137456	-0.139027	-0.140564	-0.142066	-0.143535	-0.14497	-0.146371	-0.147739	-0.149073	-0.150374	-0.151642	-0.152878	-0.154082	-0.155254	-0.156395	-0.157505	-0.158585	-0.159635	-0.160655	-0.161646	-0.162609	-0.163545	-0.164454	-0.165336	-0.166192	-0.167024	-0.167831	-0.168615	-0.169376	-0.170115	-0.170833	-0.17153	-0.172208	-0.172866	-0.173507	-0.17413	-0.174737	-0.175328
0	119	FALSE	20	-1.72047	-1.71174	-1.70301	-1.69429	-1.68557	-1.67686	-1.66816	-1.65945	-1.65076	-1.64207	-1.63338	-1.6247	-1.61602	-1.60735	-1.59868	-1.59001	-1.58135	-1.57269	-1.56403	-1.55537	-1.54672	-1.53807	-1.52941	-1.52076	-1.51211	-1.50346	-1.49481	-1.48616	-1.47751	-1.46885	-1.4602	-1.45154	-1.44288	-1.43421	-1.42554	-1.41687	-1.40819	-1.39951	-1.39082	-1.38212	-1.37342	-1.36471	-1.35599	-1.34726	-1.33853	-1.32978
1	119	FALSE	40	-1.46899	-1.46178	-1.45454	-1.44727	-1.43996	-1.43262	-1.42524	-1.41783	-1.41039	-1.4029	-1.39538	-1.38782	-1.38023	-1.37259	-1.36492	-1.3572	-1.34945	-1.34166	-1.33383	-1.32595	-1.31804	-1.3101	-1.30211	-1.29408	-1.28602	-1.27792	-1.26979	-1.26161	-1.25341	-1.24517	-1.23689	-1.22858	-1.22025	-1.21188	-1.20348	-1.19506	-1.18661	-1.17813	-1.16963	-1.1611	-1.15256	-1.14399	-1.13541	-1.12681	-1.1182	-1.10957
2	119	FALSE	80	0.0939223	0.105692	0.117361	0.128923	0.140377	0.151718	0.162943	0.174051	0.185038	0.195901	0.206639	0.21725	0.227731	0.238081	0.248299	0.258382	0.268331	0.278144	0.287821	0.29736	0.306761	0.316025	0.325151	0.334139	0.34299	0.351703	0.36028	0.368721	0.377027	0.385199	0.393239	0.401146	0.408924	0.416573	0.424094	0.431491	0.438765	0.445917	0.452951	0.459867	0.466669	0.47336	0.479941	0.486415	0.492785	0.499054
3	119	TRUE	20	0.105252	0.102263	0.0992701	0.0962756	0.0932801	0.0902843	0.0872891	0.0842954	0.0813042	0.0783163	0.0753329	0.0723548	0.0693831	0.0664189	0.0634631	0.0605169	0.0575814	0.0546577	0.0517468	0.0488501	0.0459685	0.0431033	0.0402556	0.0374265	0.0346174	0.0318293	0.0290634	0.026321	0.0236031	0.0209109	0.0182456	0.0156083	0.0130002	0.0104223	0.00787576	0.00536166	0.00288104	0.000434928	-0.00197566	-0.00434976	-0.00668639	-0.00898464	-0.0112436	-0.0134624	-0.0156402	-0.0177762
4	119	TRUE	40	0.566325	0.56721	0.568119	0.569049	0.57	0.570971	0.571961	0.572969	0.573993	0.575032	0.576085	0.57715	0.578227	0.579313	0.580408	0.581509	0.582617	0.583728	0.584841	0.585955	0.587069	0.588181	0.589288	0.59039	0.591485	0.592571	0.593646	0.59471	0.595759	0.596793	0.59781	0.598807	0.599784	0.600739	0.601669	0.602573	0.60345	0.604298	0.605115	0.605899	0.606649	0.607363	0.608039	0.608677	0.609273	0.609827
5	119	TRUE	80	-0.487709	-0.486055	-0.484366	-0.482643	-0.480885	-0.479093	-0.477266	-0.475405	-0.473509	-0.471579	-0.469614	-0.467615	-0.465581	-0.463514	-0.461412	-0.459276	-0.457106	-0.454903	-0.452667	-0.450398	-0.448096	-0.445761	-0.443394	-0.440995	-0.438565	-0.436104	-0.433612	-0.43109	-0.428537	-0.425956	-0.423346	-0.420707	-0.41804	-0.415347	-0.412626	-0.409879	-0.407107	-0.404309	-0.401488	-0.398642	-0.395773	-0.392882	-0.389969	-0.387034	-0.384079	-0.381105
0	120	FALSE	20	0.377422	0.372684	0.367933	0.363171	0.358399	0.353617	0.348827	0.34403	0.339228	0.334421	0.32961	0.324797	0.319984	0.315171	0.310359	0.30555	0.300745	0.295945	0.291151	0.286365	0.281588	0.27682	0.272064	0.267319	0.262588	0.257871	0.25317	0.248486	0.243819	0.23917	0.234541	0.229933	0.225347	0.220783	0.216242	0.211726	0.207235	0.202769	0.198331	0.19392	0.189538	0.185184	0.180861	0.176567	0.172305	0.168075
1	120	FALSE	40	-0.116106	-0.113441	-0.11076	-0.108063	-0.10535	-0.102622	-0.0998796	-0.0971232	-0.0943532	-0.0915699	-0.0887737	-0.0859648	-0.0831435	-0.0803101	-0.0774647	-0.0746076	-0.0717387	-0.0688584	-0.0659666	-0.0630634	-0.060149	-0.0572233	-0.0542864	-0.0513382	-0.0483788	-0.0454083	-0.0424265	-0.0394335	-0.0364292	-0.0334138	-0.0303871	-0.0273492	-0.0243	-0.0212397	-0.0181681	-0.0150855	-0.0119919	-0.00888728	-0.00577182	-0.00264566	0.000491071	0.00363818	0.00679547	0.00996271	0.0131396	0.016326
2	120	FALSE	80	0.732794	0.725214	0.717587	0.709916	0.702201	0.694444	0.686646	0.678809	0.670934	0.663023	0.655077	0.647098	0.639087	0.631046	0.622976	0.614878	0.606754	0.598606	0.590436	0.582243	0.574031	0.5658	0.557552	0.549289	0.541012	0.532722	0.524421	0.51611	0.507792	0.499466	0.491136	0.482801	0.474464	0.466126	0.457789	0.449453	0.441121	0.432793	0.424472	0.416158	0.407852	0.399557	0.391274	0.383003	0.374746	0.366504
3	120	TRUE	20	0.40649	0.405666	0.404835	0.403999	0.403157	0.402309	0.401456	0.400597	0.399733	0.398863	0.397989	0.39711	0.396226	0.395337	0.394444	0.393546	0.392644	0.391738	0.390828	0.389915	0.388997	0.388076	0.387152	0.386224	0.385293	0.384359	0.383422	0.382482	0.381539	0.380594	0.379646	0.378695	0.377742	0.376787	0.375829	0.374869	0.373906	0.372942	0.371975	0.371006	0.370034	0.369061	0.368085	0.367107	0.366127	0.365145
4	120	TRUE	40	0.386064	0.383376	0.380702	0.378044	0.375402	0.372774	0.370162	0.367565	0.364983	0.362416	0.359864	0.357328	0.354806	0.352298	0.349806	0.347328	0.344865	0.342417	0.339984	0.337564	0.33516	0.33277	0.330394	0.328033	0.325687	0.323355	0.321037	0.318733	0.316444	0.314169	0.311909	0.309663	0.307431	0.305213	0.30301	0.300821	0.298646	0.296486	0.294339	0.292207	0.290089	0.287986	0.285896	0.283821	0.281761	0.279714
5	120	TRUE	80	-0.557638	-0.55364	-0.549672	-0.545734	-0.541825	-0.537947	-0.534098	-0.530278	-0.526488	-0.522726	-0.518994	-0.51529	-0.511614	-0.507967	-0.504347	-0.500755	-0.49719	-0.493651	-0.49014	-0.486654	-0.483194	-0.47976	-0.47635	-0.472965	-0.469604	-0.466266	-0.462951	-0.459659	-0.456389	-0.453141	-0.449913	-0.446705	-0.443518	-0.440349	-0.437199	-0.434067	-0.430952	-0.427854	-0.424771	-0.421704	-0.418652	-0.415613	-0.412587	-0.409574	-0.406572	-0.403581
0	122	FALSE	20	0.309765	0.31583	0.321887	0.327937	0.333976	0.340003	0.346017	0.352016	0.357999	0.363964	0.369909	0.375834	0.381735	0.387612	0.393464	0.399288	0.405083	0.410848	0.41658	0.42228	0.427944	0.433571	0.439161	0.444711	0.450221	0.455688	0.461111	0.466489	0.471821	0.477104	0.482338	0.487521	0.492652	0.49773	0.502752	0.507719	0.512628	0.517478	0.522268	0.526997	0.531663	0.536266	0.540803	0.545274	0.549677	0.554012
1	122	FALSE	40	-0.424714	-0.429802	-0.434875	-0.43993	-0.444964	-0.449974	-0.454958	-0.459914	-0.464839	-0.46973	-0.474585	-0.4794	-0.484174	-0.488902	-0.493583	-0.498214	-0.502792	-0.507313	-0.511776	-0.516177	-0.520514	-0.524784	-0.528983	-0.53311	-0.537162	-0.541136	-0.545029	-0.548838	-0.552562	-0.556198	-0.559743	-0.563194	-0.566551	-0.569809	-0.572967	-0.576023	-0.578974	-0.581819	-0.584556	-0.587182	-0.589697	-0.592097	-0.594382	-0.59655	-0.598599	-0.600528
2	122	FALSE	80	0.606615	0.591079	0.575666	0.560379	0.545217	0.530183	0.515277	0.500499	0.485852	0.471335	0.45695	0.442697	0.428577	0.41459	0.400738	0.38702	0.373437	0.35999	0.346678	0.333503	0.320463	0.30756	0.294794	0.282163	0.26967	0.257312	0.245091	0.233006	0.221056	0.209241	0.197562	0.186017	0.174605	0.163327	0.152182	0.141169	0.130287	0.119535	0.108913	0.0984203	0.0880551	0.0778168	0.0677045	0.057717	0.0478534	0.0381125
3	122	TRUE	20	0.246899	0.244421	0.241969	0.239545	0.237146	0.234774	0.232428	0.230107	0.227813	0.225543	0.223299	0.22108	0.218885	0.216715	0.214569	0.212447	0.210348	0.208273	0.206221	0.204191	0.202184	0.200199	0.198235	0.196293	0.194372	0.192471	0.190591	0.188731	0.18689	0.185068	0.183265	0.181481	0.179714	0.177965	0.176233	0.174518	0.17282	0.171137	0.169469	0.167817	0.16618	0.164556	0.162947	0.16135	0.159767	0.158196
4	122	TRUE	40	0.888967	0.888419	0.887866	0.887306	0.886741	0.886168	0.885589	0.885003	0.884409	0.883807	0.883197	0.882578	0.88195	0.881313	0.880667	0.880011	0.879344	0.878667	0.87798	0.877281	0.87657	0.875848	0.875113	0.874366	0.873606	0.872832	0.872045	0.871244	0.870429	0.869599	0.868754	0.867894	0.867018	0.866126	0.865218	0.864292	0.863349	0.862389	0.861411	0.860414	0.859398	0.858363	0.857309	0.856234	0.855139	0.854023
5	122	TRUE	80	-0.0429852	-0.0409812	-0.03897	-0.0369516	-0.0349264	-0.0328944	-0.0308558	-0.0288109	-0.0267598	-0.0247029	-0.0226402	-0.0205721	-0.0184988	-0.0164205	-0.0143377	-0.0122504	-0.0101591	-0.00806394	-0.00596537	-0.00386367	-0.00175918	0.000347761	0.00245679	0.00456754	0.00667964	0.00879269	0.0109063	0.0130201	0.0151336	0.0172464	0.019358	0.0214681	0.0235762	0.0256818	0.0277843	0.0298834	0.0319785	0.0340691	0.0361547	0.0382348	0.0403088	0.0423762	0.0444365	0.046489	0.0485332	0.0505685
0	123	FALSE	20	-0.934266	-0.929089	-0.92395	-0.918849	-0.913787	-0.908763	-0.903778	-0.89883	-0.89392	-0.889048	-0.884214	-0.879416	-0.874656	-0.869933	-0.865246	-0.860595	-0.85598	-0.8514	-0.846856	-0.842347	-0.837872	-0.833432	-0.829026	-0.824653	-0.820313	-0.816007	-0.811733	-0.807491	-0.803281	-0.799102	-0.794954	-0.790838	-0.786751	-0.782695	-0.778668	-0.774671	-0.770702	-0.766762	-0.76285	-0.758966	-0.75511	-0.75128	-0.747477	-0.7437	-0.739949	-0.736224
1	123	FALSE	40	-1.66705	-1.66275	-1.65839	-1.65396	-1.64946	-1.6449	-1.64026	-1.63556	-1.63078	-1.62594	-1.62102	-1.61603	-1.61097	-1.60583	-1.60061	-1.59533	-1.58996	-1.58452	-1.57901	-1.57341	-1.56774	-1.562	-1.55617	-1.55027	-1.54429	-1.53823	-1.5321	-1.52589	-1.5196	-1.51323	-1.50679	-1.50027	-1.49368	-1.48701	-1.48026	-1.47344	-1.46655	-1.45958	-1.45254	-1.44543	-1.43825	-1.431	-1.42368	-1.41628	-1.40883	-1.4013
2	123	FALSE	80	-0.165087	-0.163273	-0.161546	-0.159907	-0.158353	-0.156882	-0.155494	-0.154186	-0.152958	-0.151807	-0.150732	-0.149731	-0.148802	-0.147945	-0.147157	-0.146437	-0.145783	-0.145194	-0.144667	-0.144202	-0.143797	-0.14345	-0.14316	-0.142925	-0.142744	-0.142615	-0.142538	-0.14251	-0.142531	-0.142598	-0.142712	-0.14287	-0.143071	-0.143315	-0.143599	-0.143924	-0.144287	-0.144688	-0.145126	-0.1456	-0.146108	-0.146651	-0.147226	-0.147834	-0.148473	-0.149143
3	123	TRUE	20	-0.529646	-0.528848	-0.528055	-0.527265	-0.526478	-0.525694	-0.524913	-0.524135	-0.523358	-0.522584	-0.521812	-0.521041	-0.520271	-0.519502	-0.518734	-0.517965	-0.517197	-0.516428	-0.515658	-0.514888	-0.514115	-0.513341	-0.512565	-0.511786	-0.511005	-0.51022	-0.509431	-0.508639	-0.507842	-0.507041	-0.506234	-0.505422	-0.504604	-0.50378	-0.502949	-0.502111	-0.501265	-0.500412	-0.49955	-0.498679	-0.497799	-0.49691	-0.49601	-0.4951	-0.494179	-0.493247
4	123	TRUE	40	-0.629516	-0.6275	-0.625507	-0.623537	-0.62159	-0.619665	-0.617762	-0.615881	-0.614021	-0.612181	-0.610362	-0.608562	-0.606782	-0.605021	-0.603279	-0.601555	-0.599849	-0.59816	-0.596488	-0.594833	-0.593194	-0.59157	-0.589962	-0.588369	-0.586789	-0.585224	-0.583672	-0.582134	-0.580608	-0.579094	-0.577593	-0.576102	-0.574623	-0.573154	-0.571695	-0.570246	-0.568807	-0.567376	-0.565954	-0.56454	-0.563133	-0.561734	-0.560342	-0.558957	-0.557577	-0.556204
5	123	TRUE	80	-0.318077	-0.318577	-0.319084	-0.319596	-0.320115	-0.32064	-0.321172	-0.321709	-0.322253	-0.322803	-0.323358	-0.32392	-0.324487	-0.325061	-0.32564	-0.326224	-0.326814	-0.32741	-0.328011	-0.328618	-0.329229	-0.329846	-0.330468	-0.331094	-0.331725	-0.332361	-0.333001	-0.333646	-0.334295	-0.334948	-0.335604	-0.336264	-0.336928	-0.337595	-0.338266	-0.338939	-0.339615	-0.340293	-0.340974	-0.341657	-0.342342	-0.343028	-0.343716	-0.344405	-0.345095	-0.345786
0	124	FALSE	20	0.314145	0.329368	0.344348	0.359082	0.373566	0.387798	0.401775	0.415494	0.428953	0.442149	0.45508	0.467743	0.480137	0.492259	0.504108	0.515682	0.526979	0.537998	0.548737	0.559195	0.569372	0.579265	0.588875	0.598201	0.607241	0.615996	0.624464	0.632647	0.640543	0.648153	0.655477	0.662515	0.669268	0.675735	0.681918	0.687818	0.693435	0.698769	0.703823	0.708597	0.713093	0.717312	0.721255	0.724923	0.72832	0.731446
1	124	FALSE	40	-0.276922	-0.280649	-0.284429	-0.288259	-0.29214	-0.29607	-0.300051	-0.30408	-0.308158	-0.312283	-0.316455	-0.320673	-0.324935	-0.329242	-0.333592	-0.337983	-0.342415	-0.346886	-0.351396	-0.355942	-0.360523	-0.365138	-0.369785	-0.374462	-0.379169	-0.383902	-0.38866	-0.393441	-0.398244	-0.403066	-0.407905	-0.412758	-0.417624	-0.422501	-0.427385	-0.432275	-0.437168	-0.442061	-0.446952	-0.451838	-0.456716	-0.461584	-0.466438	-0.471277	-0.476096	-0.480892
2	124	FALSE	80	-1.97499	-1.97873	-1.98238	-1.98593	-1.98938	-1.99272	-1.99596	-1.99909	-2.00211	-2.00502	-2.00782	-2.0105	-2.01307	-2.01552	-2.01785	-2.02006	-2.02214	-2.0241	-2.02594	-2.02765	-2.02923	-2.03069	-2.03201	-2.03321	-2.03427	-2.0352	-2.03599	-2.03665	-2.03718	-2.03757	-2.03783	-2.03795	-2.03793	-2.03778	-2.03749	-2.03706	-2.0365	-2.03579	-2.03496	-2.03398	-2.03287	-2.03163	-2.03024	-2.02873	-2.02708	-2.02529
3	124	TRUE	20	0.448716	0.451498	0.454258	0.456996	0.45971	0.4624	0.465066	0.467705	0.470319	0.472905	0.475464	0.477993	0.480492	0.482961	0.485398	0.487802	0.490172	0.492508	0.494808	0.49707	0.499295	0.501481	0.503626	0.505731	0.507792	0.50981	0.511784	0.513711	0.515591	0.517423	0.519206	0.520938	0.522618	0.524246	0.525819	0.527337	0.528799	0.530203	0.531549	0.532835	0.53406	0.535223	0.536324	0.53736	0.538332	0.539238
4	124	TRUE	40	-0.440078	-0.436514	-0.432948	-0.429378	-0.425805	-0.42223	-0.418653	-0.415073	-0.411492	-0.407909	-0.404324	-0.400738	-0.397151	-0.393563	-0.389974	-0.386385	-0.382795	-0.379205	-0.375615	-0.372025	-0.368434	-0.364845	-0.361255	-0.357666	-0.354078	-0.35049	-0.346903	-0.343317	-0.339732	-0.336148	-0.332565	-0.328983	-0.325402	-0.321823	-0.318246	-0.314669	-0.311095	-0.307521	-0.30395	-0.30038	-0.296812	-0.293246	-0.289682	-0.28612	-0.28256	-0.279002
5	124	TRUE	80	-0.124678	-0.122707	-0.120743	-0.118788	-0.116841	-0.114902	-0.112972	-0.11105	-0.109138	-0.107234	-0.10534	-0.103455	-0.10158	-0.0997154	-0.0978604	-0.096016	-0.0941822	-0.0923594	-0.0905479	-0.0887479	-0.0869598	-0.085184	-0.0834206	-0.0816701	-0.0799328	-0.0782091	-0.0764994	-0.0748039	-0.0731232	-0.0714575	-0.0698074	-0.0681731	-0.0665552	-0.064954	-0.0633699	-0.0618035	-0.060255	-0.0587249	-0.0572138	-0.0557219	-0.0542498	-0.0527979	-0.0513665	-0.0499563	-0.0485676	-0.0472008
0	125	FALSE	20	1.05485	1.05617	1.05747	1.05875	1.06	1.06122	1.06242	1.06359	1.06473	1.06584	1.06691	1.06796	1.06897	1.06994	1.07088	1.07178	1.07264	1.07347	1.07425	1.075	1.0757	1.07636	1.07697	1.07755	1.07808	1.07856	1.07899	1.07938	1.07972	1.08002	1.08026	1.08045	1.0806	1.08069	1.08073	1.08072	1.08066	1.08054	1.08037	1.08014	1.07986	1.07953	1.07914	1.07869	1.07818	1.07762
1	125	FALSE	40	1.4433	1.43744	1.43168	1.42603	1.42048	1.41503	1.40969	1.40446	1.39933	1.39432	1.38941	1.38462	1.37994	1.37537	1.37092	1.36657	1.36235	1.35824	1.35424	1.35036	1.34659	1.34294	1.3394	1.33598	1.33267	1.32948	1.3264	1.32344	1.32059	1.31785	1.31522	1.31271	1.3103	1.30801	1.30583	1.30375	1.30178	1.29992	1.29816	1.2965	1.29495	1.2935	1.29215	1.2909	1.28975	1.28869
2	125	FALSE	80	0.300403	0.301875	0.303327	0.30476	0.306173	0.307564	0.308934	0.310282	0.311606	0.312907	0.314184	0.315435	0.316661	0.317861	0.319033	0.320179	0.321296	0.322385	0.323444	0.324474	0.325474	0.326443	0.327381	0.328287	0.329162	0.330003	0.330812	0.331588	0.33233	0.333038	0.333711	0.33435	0.334954	0.335522	0.336055	0.336552	0.337013	0.337437	0.337825	0.338176	0.33849	0.338766	0.339006	0.339207	0.339371	0.339497
3	125	TRUE	20	-0.413983	-0.411177	-0.408411	-0.405683	-0.402996	-0.400348	-0.397741	-0.395176	-0.392652	-0.39017	-0.387731	-0.385335	-0.382983	-0.380674	-0.37841	-0.376191	-0.374017	-0.371889	-0.369806	-0.36777	-0.36578	-0.363836	-0.36194	-0.360092	-0.35829	-0.356537	-0.354831	-0.353173	-0.351563	-0.350002	-0.348488	-0.347023	-0.345606	-0.344238	-0.342917	-0.341645	-0.34042	-0.339243	-0.338113	-0.337031	-0.335996	-0.335007	-0.334064	-0.333168	-0.332316	-0.33151
4	125	TRUE	40	-0.121507	-0.118846	-0.116192	-0.113547	-0.11091	-0.108282	-0.105664	-0.103057	-0.10046	-0.0978761	-0.0953042	-0.0927453	-0.0902002	-0.0876694	-0.0851537	-0.0826537	-0.08017	-0.0777032	-0.0752541	-0.0728232	-0.0704113	-0.0680189	-0.0656467	-0.0632953	-0.0609654	-0.0586575	-0.0563723	-0.0541104	-0.0518725	-0.049659	-0.0474705	-0.0453077	-0.0431711	-0.0410613	-0.0389787	-0.036924	-0.0348975	-0.0328999	-0.0309315	-0.0289928	-0.0270842	-0.0252062	-0.0233591	-0.0215434	-0.0197592	-0.0180071
5	125	TRUE	80	-0.627991	-0.619088	-0.610245	-0.601463	-0.592742	-0.584085	-0.575493	-0.566966	-0.558506	-0.550114	-0.541791	-0.533538	-0.525357	-0.517247	-0.509211	-0.501249	-0.493363	-0.485552	-0.477819	-0.470163	-0.462586	-0.455089	-0.447671	-0.440335	-0.43308	-0.425907	-0.418817	-0.41181	-0.404886	-0.398048	-0.391293	-0.384624	-0.37804	-0.371542	-0.365129	-0.358803	-0.352562	-0.346408	-0.340341	-0.334359	-0.328464	-0.322655	-0.316932	-0.311295	-0.305743	-0.300277
0	126	FALSE	20	0.27578	0.274698	0.273611	0.272519	0.271422	0.270321	0.269217	0.268111	0.267002	0.265893	0.264783	0.263673	0.262564	0.261456	0.26035	0.259248	0.258149	0.257054	0.255964	0.254881	0.253803	0.252733	0.25167	0.250616	0.249572	0.248537	0.247512	0.246498	0.245496	0.244506	0.243529	0.242566	0.241615	0.24068	0.239759	0.238853	0.237963	0.237089	0.236231	0.23539	0.234566	0.23376	0.232971	0.232201	0.231449	0.230715
1	126	FALSE	40	-0.0154914	-0.0145098	-0.0135047	-0.0124768	-0.0114267	-0.010355	-0.00926235	-0.00814946	-0.00701697	-0.00586556	-0.00469593	-0.00350878	-0.00230482	-0.00108477	0.000150628	0.00140063	0.00266449	0.00394143	0.00523068	0.00653146	0.00784298	0.00916443	0.010495	0.0118339	0.0131802	0.0145332	0.015892	0.0172557	0.0186234	0.0199944	0.0213677	0.0227424	0.0241177	0.0254926	0.0268662	0.0282376	0.0296058	0.03097	0.0323291	0.0336822	0.0350284	0.0363666	0.037696	0.0390154	0.040324	0.0416208
2	126	FALSE	80	0.849518	0.849015	0.848487	0.847934	0.847354	0.846748	0.846115	0.845455	0.844766	0.84405	0.843304	0.84253	0.841725	0.840891	0.840026	0.83913	0.838203	0.837244	0.836252	0.835229	0.834172	0.833082	0.831959	0.830802	0.82961	0.828384	0.827124	0.825828	0.824497	0.82313	0.821727	0.820288	0.818812	0.817299	0.81575	0.814163	0.812539	0.810877	0.809177	0.807438	0.805661	0.803846	0.801991	0.800096	0.798163	0.796189
3	126	TRUE	20	1.25859	1.25141	1.24422	1.23701	1.2298	1.22257	1.21533	1.20808	1.20082	1.19355	1.18627	1.17898	1.17168	1.16437	1.15705	1.14972	1.14238	1.13503	1.12768	1.12031	1.11294	1.10556	1.09817	1.09078	1.08337	1.07596	1.06854	1.06111	1.05367	1.04623	1.03878	1.03132	1.02385	1.01638	1.0089	1.00141	0.993909	0.986404	0.978891	0.971371	0.963842	0.956305	0.94876	0.941207	0.933645	0.926075
4	126	TRUE	40	0.607128	0.605227	0.603317	0.601396	0.599466	0.597525	0.595574	0.593613	0.591642	0.589661	0.58767	0.585668	0.583656	0.581633	0.5796	0.577557	0.575503	0.573439	0.571365	0.569279	0.567184	0.565078	0.562961	0.560835	0.558697	0.556549	0.554391	0.552222	0.550043	0.547853	0.545654	0.543443	0.541223	0.538992	0.536751	0.5345	0.532239	0.529968	0.527687	0.525396	0.523096	0.520785	0.518465	0.516135	0.513796	0.511447
5	126	TRUE	80	0.495859	0.492514	0.489187	0.485877	0.482585	0.479311	0.476054	0.472815	0.469593	0.466389	0.463202	0.460032	0.45688	0.453745	0.450627	0.447526	0.444441	0.441373	0.438322	0.435287	0.432267	0.429264	0.426275	0.423302	0.420344	0.4174	0.414471	0.411555	0.408653	0.405764	0.402888	0.400025	0.397173	0.394332	0.391503	0.388685	0.385877	0.383078	0.380289	0.377509	0.374737	0.371973	0.369217	0.366468	0.363725	0.360988
0	127	FALSE	20	-0.911726	-0.91072	-0.909712	-0.908701	-0.907687	-0.90667	-0.90565	-0.904626	-0.903598	-0.902564	-0.901526	-0.900481	-0.89943	-0.898372	-0.897306	-0.896232	-0.895148	-0.894055	-0.892952	-0.891837	-0.890711	-0.889571	-0.888419	-0.887252	-0.88607	-0.884872	-0.883657	-0.882425	-0.881174	-0.879904	-0.878615	-0.877304	-0.875972	-0.874617	-0.873239	-0.871836	-0.870409	-0.868955	-0.867475	-0.865968	-0.864432	-0.862868	-0.861274	-0.859649	-0.857993	-0.856305
1	127	FALSE	40	1.58609	1.58048	1.57479	1.56902	1.56318	1.55726	1.55126	1.54518	1.53902	1.53278	1.52646	1.52006	1.51358	1.50702	1.50038	1.49365	1.48685	1.47996	1.473	1.46595	1.45882	1.45161	1.44432	1.43696	1.42951	1.42198	1.41438	1.4067	1.39894	1.3911	1.38319	1.3752	1.36714	1.35901	1.35081	1.34253	1.33419	1.32577	1.31729	1.30874	1.30013	1.29145	1.28272	1.27392	1.26506	1.25614
2	127	FALSE	80	1.09221	1.08478	1.07727	1.06968	1.062	1.05424	1.0464	1.03848	1.03048	1.0224	1.01425	1.00602	0.997721	0.98935	0.980908	0.972398	0.96382	0.955176	0.946468	0.937696	0.928863	0.919969	0.911016	0.902006	0.89294	0.883818	0.874644	0.865418	0.856141	0.846815	0.837442	0.828022	0.818557	0.809049	0.799499	0.789907	0.780277	0.770608	0.760903	0.751162	0.741387	0.731579	0.72174	0.711871	0.701974	0.692048
3	127	TRUE	20	0.522976	0.522505	0.522032	0.52156	0.521088	0.520616	0.520145	0.519674	0.519204	0.518734	0.518266	0.517799	0.517333	0.516868	0.516405	0.515943	0.515483	0.515025	0.514568	0.514113	0.513659	0.513207	0.512757	0.512308	0.511861	0.511416	0.510972	0.510529	0.510087	0.509647	0.509207	0.508768	0.50833	0.507892	0.507454	0.507017	0.506579	0.50614	0.505701	0.50526	0.504818	0.504374	0.503928	0.50348	0.503029	0.502574
4	127	TRUE	40	0.175953	0.176748	0.177527	0.178289	0.179035	0.179764	0.180476	0.18117	0.181847	0.182506	0.183146	0.183769	0.184373	0.184958	0.185524	0.186072	0.1866	0.187109	0.187598	0.188068	0.188518	0.188949	0.189359	0.18975	0.190121	0.190471	0.190802	0.191112	0.191403	0.191673	0.191922	0.192152	0.192361	0.19255	0.192718	0.192866	0.192994	0.193102	0.193189	0.193256	0.193303	0.19333	0.193337	0.193324	0.19329	0.193237
5	127	TRUE	80	0.550177	0.550608	0.551042	0.551479	0.551919	0.552361	0.552804	0.553248	0.553693	0.554137	0.554582	0.555025	0.555466	0.555906	0.556342	0.556776	0.557206	0.557632	0.558053	0.558468	0.558878	0.559281	0.559677	0.560066	0.560446	0.560818	0.56118	0.561533	0.561875	0.562205	0.562525	0.562831	0.563125	0.563406	0.563672	0.563924	0.564161	0.564381	0.564585	0.564773	0.564942	0.565094	0.565226	0.56534	0.565433	0.565506
0	128	FALSE	20	-3.28061	-3.26799	-3.25534	-3.24265	-3.22993	-3.21716	-3.20435	-3.1915	-3.17861	-3.16567	-3.1527	-3.13968	-3.12662	-3.11352	-3.10038	-3.08719	-3.07395	-3.06067	-3.04735	-3.03398	-3.02057	-3.00711	-2.9936	-2.98005	-2.96645	-2.95281	-2.93911	-2.92537	-2.91158	-2.89774	-2.88386	-2.86992	-2.85594	-2.84191	-2.82782	-2.81369	-2.79951	-2.78528	-2.771	-2.75667	-2.74228	-2.72785	-2.71337	-2.69884	-2.68426	-2.66962
1	128	FALSE	40	-1.6552	-1.64999	-1.64475	-1.63948	-1.6342	-1.6289	-1.62358	-1.61823	-1.61287	-1.60749	-1.60208	-1.59666	-1.59123	-1.58577	-1.58029	-1.5748	-1.56929	-1.56377	-1.55823	-1.55267	-1.5471	-1.54151	-1.53591	-1.53029	-1.52466	-1.51902	-1.51336	-1.50769	-1.50201	-1.49632	-1.49061	-1.48489	-1.47916	-1.47342	-1.46767	-1.46191	-1.45615	-1.45037	-1.44458	-1.43878	-1.43298	-1.42717	-1.42135	-1.41552	-1.40969	-1.40384
2	128	FALSE	80	-0.982239	-0.981789	-0.981337	-0.980885	-0.980431	-0.979977	-0.979523	-0.979067	-0.978612	-0.978155	-0.977698	-0.97724	-0.976782	-0.976323	-0.975863	-0.975403	-0.974942	-0.974481	-0.974018	-0.973556	-0.973092	-0.972628	-0.972164	-0.971698	-0.971232	-0.970764	-0.970296	-0.969827	-0.969357	-0.968886	-0.968413	-0.96794	-0.967465	-0.966989	-0.966511	-0.966032	-0.965551	-0.965069	-0.964585	-0.964098	-0.96361	-0.96312	-0.962627	-0.962132	-0.961635	-0.961135
3	128	TRUE	20	0.916528	0.917131	0.917694	0.918218	0.918702	0.919146	0.919548	0.91991	0.92023	0.920509	0.920746	0.920941	0.921093	0.921203	0.921269	0.921293	0.921273	0.92121	0.921103	0.920953	0.920758	0.92052	0.920237	0.91991	0.919539	0.919124	0.918664	0.91816	0.917611	0.917018	0.916381	0.9157	0.914975	0.914205	0.913392	0.912535	0.911634	0.91069	0.909702	0.908671	0.907598	0.906482	0.905323	0.904123	0.902881	0.901597
4	128	TRUE	40	0.351904	0.352284	0.352607	0.352873	0.353082	0.353234	0.35333	0.353371	0.353355	0.353284	0.353157	0.352976	0.352739	0.352448	0.352103	0.351704	0.351251	0.350744	0.350184	0.349571	0.348906	0.348188	0.347418	0.346596	0.345722	0.344797	0.343821	0.342795	0.341718	0.340591	0.339414	0.338187	0.336912	0.335587	0.334214	0.332793	0.331324	0.329808	0.328244	0.326634	0.324977	0.323274	0.321525	0.319731	0.317892	0.316008
5	128	TRUE	80	-0.465314	-0.46628	-0.467253	-0.468231	-0.469214	-0.470201	-0.471193	-0.472189	-0.473188	-0.474189	-0.475193	-0.476198	-0.477204	-0.478211	-0.479218	-0.480225	-0.48123	-0.482234	-0.483235	-0.484233	-0.485229	-0.48622	-0.487206	-0.488187	-0.489162	-0.490131	-0.491093	-0.492047	-0.492992	-0.493929	-0.494856	-0.495772	-0.496678	-0.497572	-0.498454	-0.499323	-0.500178	-0.50102	-0.501846	-0.502657	-0.503452	-0.50423	-0.50499	-0.505732	-0.506456	-0.50716
0	129	FALSE	20	0.0100492	0.0114786	0.0128858	0.014271	0.0156344	0.0169761	0.0182963	0.0195951	0.0208727	0.0221292	0.0233647	0.0245792	0.0257728	0.0269457	0.0280978	0.0292291	0.0303396	0.0314294	0.0324984	0.0335464	0.0345735	0.0355794	0.0365642	0.0375276	0.0384695	0.0393896	0.0402878	0.0411639	0.0420175	0.0428484	0.0436565	0.0444412	0.0452024	0.0459398	0.046653	0.0473416	0.0480054	0.0486439	0.0492569	0.0498439	0.0504046	0.0509387	0.0514457	0.0519253	0.052377	0.0528007
1	129	FALSE	40	-0.561661	-0.559929	-0.558176	-0.556401	-0.554604	-0.552783	-0.550938	-0.549069	-0.547175	-0.545256	-0.54331	-0.541338	-0.539339	-0.537313	-0.535259	-0.533178	-0.531069	-0.528932	-0.526767	-0.524574	-0.522353	-0.520103	-0.517826	-0.515521	-0.513187	-0.510826	-0.508438	-0.506022	-0.50358	-0.50111	-0.498614	-0.496093	-0.493545	-0.490972	-0.488374	-0.485752	-0.483105	-0.480435	-0.477741	-0.475025	-0.472287	-0.469526	-0.466745	-0.463942	-0.461119	-0.458277
2	129	FALSE	80	0.847435	0.857611	0.867583	0.877347	0.886896	0.896226	0.905331	0.914206	0.922847	0.931248	0.939404	0.947311	0.954964	0.962359	0.969491	0.976355	0.982949	0.989267	0.995306	1.00106	1.00653	1.01171	1.0166	1.02119	1.02548	1.02948	1.03316	1.03655	1.03962	1.04238	1.04484	1.04698	1.0488	1.05032	1.05151	1.0524	1.05296	1.05321	1.05315	1.05276	1.05207	1.05106	1.04974	1.04811	1.04617	1.04393
3	129	TRUE	20	0.142162	0.141486	0.140813	0.140141	0.139472	0.138803	0.138136	0.137469	0.136803	0.136137	0.135471	0.134804	0.134137	0.13347	0.1328	0.13213	0.131457	0.130783	0.130106	0.129427	0.128745	0.12806	0.127372	0.12668	0.125985	0.125285	0.124582	0.123874	0.123162	0.122445	0.121723	0.120997	0.120265	0.119529	0.118787	0.118039	0.117286	0.116528	0.115765	0.114996	0.114221	0.113441	0.112656	0.111865	0.11107	0.110268
4	129	TRUE	40	-0.121355	-0.12263	-0.123886	-0.125125	-0.126345	-0.127547	-0.128731	-0.129897	-0.131044	-0.132173	-0.133283	-0.134374	-0.135447	-0.136501	-0.137535	-0.138551	-0.139547	-0.140525	-0.141483	-0.142421	-0.143341	-0.14424	-0.145121	-0.145981	-0.146822	-0.147643	-0.148445	-0.149226	-0.149988	-0.15073	-0.151452	-0.152153	-0.152835	-0.153497	-0.154138	-0.15476	-0.155361	-0.155942	-0.156503	-0.157043	-0.157564	-0.158064	-0.158544	-0.159004	-0.159443	-0.159863
5	129	TRUE	80	-0.0868803	-0.0861772	-0.0855032	-0.0848581	-0.0842413	-0.0836526	-0.0830916	-0.0825578	-0.0820508	-0.0815703	-0.0811157	-0.0806864	-0.0802822	-0.0799023	-0.0795463	-0.0792137	-0.0789038	-0.0786162	-0.0783501	-0.0781051	-0.0778805	-0.0776756	-0.0774899	-0.0773227	-0.0771734	-0.0770412	-0.0769256	-0.0768259	-0.0767413	-0.0766712	-0.0766149	-0.0765718	-0.076541	-0.076522	-0.076514	-0.0765162	-0.0765282	-0.076549	-0.076578	-0.0766146	-0.0766581	-0.0767076	-0.0767627	-0.0768226	-0.0768867	-0.0769542
0	130	FALSE	20	0.652778	0.649932	0.647073	0.644201	0.641316	0.638419	0.63551	0.632589	0.629657	0.626713	0.623759	0.620795	0.61782	0.614836	0.611843	0.60884	0.605828	0.602808	0.59978	0.596744	0.593701	0.59065	0.587593	0.584528	0.581458	0.578381	0.575299	0.572212	0.569119	0.566021	0.562919	0.559812	0.556702	0.553587	0.550469	0.547348	0.544223	0.541096	0.537966	0.534833	0.531699	0.528562	0.525424	0.522284	0.519142	0.515999
1	130	FALSE	40	1.34302	1.33716	1.33125	1.32531	1.31932	1.3133	1.30723	1.30112	1.29497	1.28878	1.28256	1.27629	1.26999	1.26365	1.25727	1.25086	1.24441	1.23792	1.2314	1.22485	1.21826	1.21163	1.20498	1.19829	1.19157	1.18482	1.17804	1.17123	1.16439	1.15752	1.15062	1.1437	1.13674	1.12977	1.12276	1.11573	1.10868	1.1016	1.0945	1.08737	1.08023	1.07306	1.06587	1.05866	1.05143	1.04418
2	130	FALSE	80	-2.39832	-2.38793	-2.37754	-2.36713	-2.35672	-2.34629	-2.33586	-2.32542	-2.31498	-2.30453	-2.29407	-2.28361	-2.27315	-2.26268	-2.25221	-2.24174	-2.23127	-2.2208	-2.21033	-2.19986	-2.18939	-2.17892	-2.16846	-2.158	-2.14755	-2.1371	-2.12666	-2.11622	-2.1058	-2.09538	-2.08496	-2.07456	-2.06417	-2.05379	-2.04342	-2.03306	-2.02272	-2.01239	-2.00207	-1.99176	-1.98147	-1.9712	-1.96094	-1.95069	-1.94047	-1.93026
3	130	TRUE	20	0.211257	0.209141	0.207024	0.204906	0.202787	0.200668	0.19855	0.196431	0.194313	0.192195	0.190077	0.187961	0.185846	0.183732	0.181619	0.179508	0.177398	0.175291	0.173185	0.171082	0.168981	0.166882	0.164786	0.162692	0.160602	0.158514	0.156429	0.154347	0.152269	0.150194	0.148122	0.146054	0.14399	0.141929	0.139872	0.137819	0.13577	0.133724	0.131683	0.129646	0.127613	0.125584	0.123559	0.121539	0.119523	0.117511
4	130	TRUE	40	-0.207579	-0.205224	-0.20287	-0.200516	-0.198162	-0.19581	-0.193458	-0.191107	-0.188757	-0.186409	-0.184063	-0.181719	-0.179377	-0.177037	-0.1747	-0.172365	-0.170034	-0.167706	-0.165381	-0.163061	-0.160744	-0.158432	-0.156124	-0.153821	-0.151523	-0.149231	-0.146944	-0.144663	-0.142388	-0.140119	-0.137858	-0.135603	-0.133355	-0.131115	-0.128883	-0.126658	-0.124442	-0.122234	-0.120035	-0.117846	-0.115665	-0.113494	-0.111333	-0.109181	-0.10704	-0.10491
5	130	TRUE	80	-0.175521	-0.174306	-0.173102	-0.171909	-0.170726	-0.169553	-0.16839	-0.167236	-0.166091	-0.164954	-0.163824	-0.162702	-0.161587	-0.160479	-0.159376	-0.158279	-0.157187	-0.1561	-0.155017	-0.153938	-0.152862	-0.15179	-0.15072	-0.149652	-0.148586	-0.147522	-0.146459	-0.145397	-0.144335	-0.143273	-0.142212	-0.14115	-0.140087	-0.139023	-0.137958	-0.136891	-0.135823	-0.134753	-0.13368	-0.132605	-0.131528	-0.130448	-0.129366	-0.12828	-0.127191	-0.1261
0	131	FALSE	20	0.612875	0.614006	0.615205	0.616472	0.617804	0.619202	0.620664	0.62219	0.623779	0.62543	0.627142	0.628913	0.630744	0.632633	0.634579	0.636581	0.638638	0.640749	0.642913	0.645128	0.647394	0.64971	0.652075	0.654487	0.656945	0.659448	0.661995	0.664585	0.667217	0.669889	0.672601	0.675352	0.678139	0.680963	0.683822	0.686714	0.68964	0.692597	0.695584	0.698601	0.701647	0.70472	0.707819	0.710944	0.714093	0.717265
1	131	FALSE	40	0.517235	0.515829	0.514399	0.512944	0.511466	0.509963	0.508435	0.506883	0.505306	0.503703	0.502075	0.500421	0.498741	0.497036	0.495303	0.493545	0.49176	0.489948	0.488108	0.486242	0.484348	0.482426	0.480477	0.4785	0.476494	0.47446	0.472398	0.470308	0.468189	0.466041	0.463864	0.461659	0.459424	0.457161	0.454869	0.452548	0.450199	0.44782	0.445413	0.442977	0.440512	0.438019	0.435498	0.432949	0.430371	0.427766
2	131	FALSE	80	1.3678	1.37598	1.38406	1.39206	1.39997	1.40779	1.41551	1.42314	1.43067	1.4381	1.44543	1.45266	1.45978	1.46679	1.4737	1.48049	1.48718	1.49374	1.5002	1.50653	1.51275	1.51885	1.52482	1.53067	1.5364	1.542	1.54747	1.55282	1.55804	1.56312	1.56808	1.5729	1.57758	1.58214	1.58655	1.59084	1.59498	1.59898	1.60285	1.60658	1.61016	1.61361	1.61691	1.62008	1.6231	1.62598
3	131	TRUE	20	0.199268	0.199615	0.199956	0.200291	0.200621	0.200945	0.201264	0.201577	0.201886	0.20219	0.202489	0.202783	0.203073	0.203358	0.20364	0.203917	0.20419	0.204459	0.204725	0.204986	0.205244	0.205499	0.20575	0.205997	0.206241	0.206481	0.206718	0.206952	0.207182	0.207409	0.207632	0.207852	0.208068	0.20828	0.208489	0.208695	0.208896	0.209094	0.209287	0.209476	0.209662	0.209842	0.210019	0.21019	0.210357	0.210519
4	131	TRUE	40	-0.0759076	-0.0757104	-0.0755132	-0.075316	-0.0751186	-0.0749206	-0.074722	-0.0745227	-0.0743224	-0.074121	-0.0739183	-0.0737142	-0.0735087	-0.0733014	-0.0730924	-0.0728815	-0.0726685	-0.0724534	-0.0722361	-0.0720164	-0.0717942	-0.0715695	-0.0713421	-0.071112	-0.0708791	-0.0706432	-0.0704044	-0.0701624	-0.0699172	-0.0696689	-0.0694171	-0.069162	-0.0689033	-0.0686411	-0.0683752	-0.0681057	-0.0678323	-0.067555	-0.0672738	-0.0669886	-0.0666992	-0.0664057	-0.066108	-0.0658059	-0.0654994	-0.0651884
5	131	TRUE	80	0.0832457	0.08073	0.0782154	0.0757024	0.0731915	0.070683	0.0681774	0.0656751	0.0631766	0.0606823	0.0581927	0.0557082	0.0532292	0.0507563	0.0482898	0.0458302	0.043378	0.0409336	0.0384975	0.0360702	0.033652	0.0312434	0.028845	0.0264571	0.0240802	0.0217147	0.0193611	0.0170198	0.0146913	0.0123759	0.0100742	0.00778651	0.00551327	0.0032549	0.0010118	-0.00121562	-0.00342697	-0.00562186	-0.0077999	-0.00996074	-0.012104	-0.0142293	-0.0163363	-0.0184247	-0.0204942	-0.0225443
0	132	FALSE	20	4.49768	4.49324	4.48843	4.48327	4.47775	4.47186	4.46562	4.45903	4.45208	4.44477	4.43711	4.4291	4.42073	4.41202	4.40295	4.39354	4.38379	4.37369	4.36325	4.35247	4.34135	4.3299	4.31811	4.30599	4.29354	4.28076	4.26765	4.25423	4.24048	4.22642	4.21204	4.19734	4.18234	4.16703	4.15142	4.1355	4.11929	4.10278	4.08598	4.06889	4.05151	4.03385	4.01591	3.99769	3.9792	3.96045
1	132	FALSE	40	-2.73931	-2.73856	-2.73765	-2.73658	-2.73535	-2.73396	-2.73242	-2.73073	-2.72889	-2.72691	-2.72478	-2.72251	-2.72011	-2.71757	-2.7149	-2.71211	-2.70919	-2.70615	-2.70299	-2.69972	-2.69634	-2.69285	-2.68926	-2.68558	-2.68179	-2.67792	-2.67395	-2.66991	-2.66578	-2.66158	-2.6573	-2.65296	-2.64855	-2.64408	-2.63956	-2.63498	-2.63035	-2.62568	-2.62097	-2.61622	-2.61144	-2.60663	-2.60179	-2.59694	-2.59206	-2.58717
2	132	FALSE	80	-1.11245	-1.10205	-1.09174	-1.08153	-1.07142	-1.0614	-1.05148	-1.04166	-1.03193	-1.0223	-1.01276	-1.00332	-0.993973	-0.984721	-0.975565	-0.966503	-0.957535	-0.948662	-0.939884	-0.9312	-0.92261	-0.914115	-0.905714	-0.897408	-0.889196	-0.881079	-0.873057	-0.86513	-0.857298	-0.849562	-0.84192	-0.834374	-0.826925	-0.819571	-0.812313	-0.805151	-0.798086	-0.791118	-0.784247	-0.777472	-0.770795	-0.764216	-0.757733	-0.751349	-0.745062	-0.738872
3	132	TRUE	20	-0.54294	-0.541622	-0.540303	-0.538981	-0.537658	-0.536333	-0.535005	-0.533674	-0.532341	-0.531004	-0.529665	-0.528321	-0.526974	-0.525623	-0.524267	-0.522907	-0.521542	-0.520172	-0.518797	-0.517417	-0.516031	-0.514639	-0.513241	-0.511836	-0.510425	-0.509007	-0.507582	-0.50615	-0.504709	-0.503261	-0.501805	-0.500341	-0.498868	-0.497386	-0.495895	-0.494395	-0.492885	-0.491365	-0.489835	-0.488295	-0.486744	-0.485183	-0.48361	-0.482027	-0.480431	-0.478824
4	132	TRUE	40	-0.264813	-0.263478	-0.26213	-0.260768	-0.259393	-0.258005	-0.256603	-0.255189	-0.253762	-0.252323	-0.250871	-0.249406	-0.247929	-0.24644	-0.244938	-0.243424	-0.241898	-0.24036	-0.238811	-0.237249	-0.235676	-0.23409	-0.232494	-0.230885	-0.229266	-0.227635	-0.225992	-0.224338	-0.222673	-0.220997	-0.21931	-0.217612	-0.215903	-0.214183	-0.212452	-0.210711	-0.208959	-0.207196	-0.205423	-0.20364	-0.201846	-0.200042	-0.198229	-0.196405	-0.194571	-0.192728
5	132	TRUE	80	0.780675	0.780934	0.781156	0.781341	0.781489	0.781601	0.781676	0.781715	0.781717	0.781683	0.781614	0.781508	0.781366	0.781188	0.780975	0.780725	0.780441	0.78012	0.779765	0.779373	0.778947	0.778485	0.777988	0.777456	0.776889	0.776286	0.775649	0.774976	0.774269	0.773527	0.77275	0.771937	0.77109	0.770209	0.769292	0.76834	0.767354	0.766333	0.765277	0.764187	0.763061	0.761901	0.760706	0.759477	0.758213	0.756914
0	133	FALSE	20	-1.2788	-1.27567	-1.27245	-1.26914	-1.26574	-1.26224	-1.25864	-1.25494	-1.25113	-1.24722	-1.2432	-1.23906	-1.23481	-1.23045	-1.22596	-1.22135	-1.21661	-1.21175	-1.20676	-1.20163	-1.19637	-1.19097	-1.18543	-1.17975	-1.17392	-1.16795	-1.16183	-1.15556	-1.14913	-1.14255	-1.13582	-1.12892	-1.12187	-1.11466	-1.10728	-1.09974	-1.09203	-1.08416	-1.07612	-1.06791	-1.05953	-1.05098	-1.04226	-1.03337	-1.0243	-1.01507
1	133	FALSE	40	-1.98124	-1.9785	-1.97575	-1.973	-1.97024	-1.96748	-1.96472	-1.96196	-1.95919	-1.95641	-1.95364	-1.95085	-1.94807	-1.94527	-1.94248	-1.93967	-1.93687	-1.93405	-1.93123	-1.9284	-1.92557	-1.92273	-1.91988	-1.91702	-1.91416	-1.91128	-1.9084	-1.9055	-1.9026	-1.89969	-1.89676	-1.89383	-1.89088	-1.88792	-1.88494	-1.88195	-1.87895	-1.87593	-1.87289	-1.86984	-1.86677	-1.86368	-1.86058	-1.85745	-1.8543	-1.85113
2	133	FALSE	80	-0.427049	-0.414695	-0.402355	-0.390027	-0.377712	-0.36541	-0.353121	-0.340845	-0.328582	-0.316333	-0.304097	-0.291876	-0.279669	-0.267478	-0.255301	-0.243141	-0.230997	-0.218871	-0.206762	-0.194671	-0.182599	-0.170547	-0.158516	-0.146505	-0.134516	-0.12255	-0.110608	-0.0986897	-0.0867966	-0.0749295	-0.0630893	-0.051277	-0.0394933	-0.0277393	-0.0160159	-0.00432395	0.00733551	0.0189615	0.0305531	0.0421094	0.0536292	0.0651116	0.0765557	0.0879604	0.0993246	0.110647
3	133	TRUE	20	0.158194	0.152425	0.146688	0.140985	0.135315	0.129679	0.124079	0.118514	0.112985	0.107493	0.102038	0.0966218	0.0912442	0.0859061	0.0806081	0.0753508	0.0701349	0.0649609	0.0598295	0.0547413	0.0496969	0.0446969	0.0397418	0.0348323	0.0299689	0.0251521	0.0203825	0.0156606	0.0109869	0.00636199	0.00178625	-0.00273981	-0.00721573	-0.0116411	-0.0160154	-0.0203382	-0.0246093	-0.0288281	-0.0329943	-0.0371076	-0.0411676	-0.0451739	-0.0491263	-0.0530245	-0.0568682	-0.0606571
4	133	TRUE	40	-0.686249	-0.684113	-0.681961	-0.679792	-0.677607	-0.675405	-0.673186	-0.670949	-0.668695	-0.666424	-0.664135	-0.661828	-0.659502	-0.657159	-0.654797	-0.652417	-0.650019	-0.647602	-0.645167	-0.642712	-0.64024	-0.637748	-0.635238	-0.63271	-0.630162	-0.627597	-0.625012	-0.62241	-0.619789	-0.617149	-0.614492	-0.611816	-0.609123	-0.606411	-0.603682	-0.600936	-0.598171	-0.59539	-0.592592	-0.589777	-0.586945	-0.584096	-0.581231	-0.57835	-0.575453	-0.57254
5	133	TRUE	80	0.290333	0.290153	0.289983	0.289824	0.289676	0.289538	0.289411	0.289295	0.28919	0.289095	0.289011	0.288937	0.288874	0.288822	0.28878	0.288749	0.288728	0.288718	0.288718	0.288728	0.288749	0.28878	0.288821	0.288872	0.288934	0.289005	0.289087	0.289179	0.289281	0.289392	0.289514	0.289646	0.289789	0.289941	0.290103	0.290276	0.290458	0.290651	0.290854	0.291067	0.291291	0.291525	0.29177	0.292025	0.292291	0.292568
0	134	FALSE	20	-0.517998	-0.51304	-0.50811	-0.503209	-0.498336	-0.493492	-0.488676	-0.483889	-0.47913	-0.4744	-0.469698	-0.465025	-0.46038	-0.455765	-0.451178	-0.44662	-0.442092	-0.437592	-0.433122	-0.428682	-0.424271	-0.419891	-0.41554	-0.41122	-0.40693	-0.402671	-0.398442	-0.394245	-0.390079	-0.385945	-0.381843	-0.377773	-0.373735	-0.36973	-0.365759	-0.36182	-0.357915	-0.354044	-0.350207	-0.346405	-0.342637	-0.338905	-0.335208	-0.331547	-0.327922	-0.324334
1	134	FALSE	40	-1.0044	-1.00132	-0.998231	-0.99513	-0.992018	-0.988894	-0.98576	-0.982614	-0.979457	-0.976289	-0.97311	-0.96992	-0.966719	-0.963506	-0.960282	-0.957046	-0.953799	-0.950541	-0.947271	-0.94399	-0.940697	-0.937393	-0.934077	-0.930749	-0.92741	-0.92406	-0.920697	-0.917323	-0.913938	-0.91054	-0.907131	-0.903711	-0.900278	-0.896834	-0.893378	-0.88991	-0.88643	-0.882938	-0.879434	-0.875919	-0.872391	-0.868851	-0.865299	-0.861734	-0.858158	-0.854568
2	134	FALSE	80	-1.35795	-1.35524	-1.35249	-1.34971	-1.3469	-1.34406	-1.34118	-1.33827	-1.33532	-1.33234	-1.32932	-1.32627	-1.32317	-1.32004	-1.31686	-1.31365	-1.3104	-1.3071	-1.30376	-1.30037	-1.29695	-1.29347	-1.28995	-1.28639	-1.28277	-1.27911	-1.2754	-1.27164	-1.26782	-1.26396	-1.26005	-1.25608	-1.25206	-1.24798	-1.24385	-1.23967	-1.23543	-1.23113	-1.22678	-1.22237	-1.2179	-1.21337	-1.20879	-1.20414	-1.19944	-1.19468
3	134	TRUE	20	-1.84832	-1.8426	-1.83684	-1.83105	-1.82522	-1.81936	-1.81346	-1.80752	-1.80155	-1.79555	-1.7895	-1.78343	-1.77732	-1.77117	-1.765	-1.75878	-1.75254	-1.74626	-1.73995	-1.73361	-1.72723	-1.72083	-1.71439	-1.70792	-1.70143	-1.6949	-1.68835	-1.68177	-1.67516	-1.66853	-1.66186	-1.65518	-1.64847	-1.64173	-1.63497	-1.62819	-1.62139	-1.61457	-1.60773	-1.60086	-1.59398	-1.58708	-1.58017	-1.57324	-1.56629	-1.55933
4	134	TRUE	40	-1.1383	-1.13354	-1.12876	-1.12396	-1.11913	-1.11428	-1.1094	-1.1045	-1.09957	-1.09461	-1.08964	-1.08463	-1.0796	-1.07455	-1.06947	-1.06436	-1.05923	-1.05407	-1.04889	-1.04368	-1.03845	-1.03319	-1.02791	-1.0226	-1.01727	-1.01191	-1.00653	-1.00113	-0.9957	-0.99025	-0.984778	-0.979283	-0.973766	-0.968228	-0.962668	-0.957088	-0.951488	-0.945868	-0.940228	-0.934569	-0.928892	-0.923197	-0.917484	-0.911755	-0.906009	-0.900246
5	134	TRUE	80	-0.499232	-0.496425	-0.493641	-0.490878	-0.488137	-0.485419	-0.482722	-0.480048	-0.477395	-0.474764	-0.472155	-0.469567	-0.467001	-0.464456	-0.461933	-0.459431	-0.45695	-0.45449	-0.452051	-0.449633	-0.447235	-0.444857	-0.4425	-0.440163	-0.437846	-0.435549	-0.433271	-0.431013	-0.428774	-0.426554	-0.424352	-0.422169	-0.420004	-0.417857	-0.415728	-0.413616	-0.411521	-0.409443	-0.407382	-0.405336	-0.403307	-0.401293	-0.399295	-0.397312	-0.395343	-0.393388
0	135	FALSE	20	-0.398989	-0.398704	-0.398435	-0.398182	-0.397946	-0.397727	-0.397524	-0.397339	-0.39717	-0.397019	-0.396885	-0.396767	-0.396667	-0.396585	-0.396519	-0.396471	-0.39644	-0.396425	-0.396428	-0.396448	-0.396485	-0.396539	-0.39661	-0.396698	-0.396802	-0.396922	-0.39706	-0.397213	-0.397383	-0.397569	-0.39777	-0.397988	-0.398222	-0.398471	-0.398735	-0.399015	-0.39931	-0.39962	-0.399944	-0.400284	-0.400638	-0.401006	-0.401389	-0.401785	-0.402196	-0.40262
1	135	FALSE	40	0.536599	0.532168	0.527704	0.523206	0.518676	0.514114	0.509519	0.504892	0.500233	0.495542	0.49082	0.486068	0.481284	0.476471	0.471627	0.466755	0.461853	0.456923	0.451966	0.446981	0.441969	0.436932	0.431869	0.426782	0.42167	0.416535	0.411377	0.406198	0.400997	0.395776	0.390535	0.385276	0.379999	0.374705	0.369394	0.364069	0.358729	0.353376	0.34801	0.342633	0.337245	0.331848	0.326442	0.321029	0.31561	0.310185
2	135	FALSE	80	1.19974	1.18891	1.17817	1.16753	1.15698	1.14653	1.13617	1.1259	1.11572	1.10564	1.09565	1.08576	1.07596	1.06625	1.05663	1.0471	1.03767	1.02832	1.01907	1.0099	1.00083	0.991844	0.982948	0.97414	0.965419	0.956785	0.948238	0.939776	0.9314	0.923108	0.914901	0.906776	0.898735	0.890775	0.882897	0.8751	0.867382	0.859744	0.852185	0.844703	0.837299	0.829972	0.82272	0.815543	0.808441	0.801412
3	135	TRUE	20	-0.00010155	0.000683898	0.00144267	0.00217477	0.0028802	0.00355898	0.00421114	0.00483668	0.00543565	0.00600807	0.00655399	0.00707346	0.00756654	0.00803328	0.00847375	0.00888804	0.00927622	0.00963839	0.00997465	0.0102851	0.0105699	0.0108291	0.0110628	0.0112713	0.0114546	0.0116129	0.0117464	0.0118553	0.0119396	0.0119997	0.0120357	0.0120478	0.0120362	0.0120011	0.0119428	0.0118615	0.0117575	0.0116309	0.011482	0.0113112	0.0111186	0.0109045	0.0106692	0.010413	0.0101362	0.00983905
4	135	TRUE	40	0.177162	0.176121	0.175051	0.173952	0.172822	0.171662	0.170473	0.169252	0.168002	0.166721	0.165409	0.164067	0.162695	0.161291	0.159857	0.158392	0.156897	0.155371	0.153814	0.152227	0.150609	0.148961	0.147282	0.145574	0.143835	0.142067	0.140268	0.138441	0.136584	0.134697	0.132782	0.130838	0.128866	0.126866	0.124838	0.122782	0.120699	0.118589	0.116452	0.114289	0.1121	0.109886	0.107646	0.105382	0.103094	0.100781
5	135	TRUE	80	0.235582	0.234349	0.233125	0.231911	0.230708	0.229514	0.228331	0.227157	0.225994	0.224841	0.223698	0.222565	0.221443	0.220331	0.219229	0.218138	0.217057	0.215987	0.214927	0.213877	0.212838	0.21181	0.210792	0.209785	0.208788	0.207802	0.206826	0.205861	0.204906	0.203962	0.203029	0.202105	0.201192	0.20029	0.199397	0.198515	0.197643	0.19678	0.195928	0.195086	0.194253	0.19343	0.192616	0.191812	0.191018	0.190232
0	136	FALSE	20	-0.144774	-0.149976	-0.15517	-0.160356	-0.165533	-0.170704	-0.175867	-0.181024	-0.186173	-0.191317	-0.196454	-0.201585	-0.206711	-0.21183	-0.216943	-0.22205	-0.227151	-0.232246	-0.237335	-0.242417	-0.247492	-0.25256	-0.25762	-0.262672	-0.267716	-0.272752	-0.277778	-0.282793	-0.287799	-0.292793	-0.297775	-0.302745	-0.307701	-0.312643	-0.31757	-0.322481	-0.327376	-0.332252	-0.337109	-0.341947	-0.346764	-0.351559	-0.356331	-0.361079	-0.365802	-0.370498
1	136	FALSE	40	-0.618337	-0.616706	-0.615069	-0.613429	-0.611786	-0.610141	-0.608495	-0.60685	-0.605205	-0.603563	-0.601925	-0.60029	-0.59866	-0.597037	-0.595419	-0.593809	-0.592207	-0.590614	-0.58903	-0.587456	-0.585893	-0.58434	-0.582799	-0.581269	-0.579752	-0.578247	-0.576755	-0.575276	-0.57381	-0.572357	-0.570918	-0.569492	-0.568079	-0.56668	-0.565294	-0.563921	-0.56256	-0.561212	-0.559876	-0.558553	-0.55724	-0.555939	-0.554648	-0.553368	-0.552097	-0.550836
2	136	FALSE	80	-0.0201096	-0.0208236	-0.0215362	-0.0222468	-0.022955	-0.0236604	-0.0243625	-0.0250607	-0.0257547	-0.026444	-0.0271281	-0.0278066	-0.028479	-0.0291449	-0.0298039	-0.0304555	-0.0310993	-0.0317349	-0.0323618	-0.0329798	-0.0335883	-0.034187	-0.0347756	-0.0353535	-0.0359206	-0.0364763	-0.0370204	-0.0375526	-0.0380724	-0.0385796	-0.0390739	-0.039555	-0.0400225	-0.0404763	-0.040916	-0.0413415	-0.0417524	-0.0421486	-0.0425298	-0.0428959	-0.0432466	-0.0435819	-0.0439015	-0.0442053	-0.0444932	-0.0447651
3	136	TRUE	20	-0.160434	-0.162197	-0.163937	-0.165656	-0.167354	-0.16903	-0.170684	-0.172318	-0.173931	-0.175522	-0.177093	-0.178644	-0.180174	-0.181684	-0.183173	-0.184643	-0.186092	-0.187522	-0.188933	-0.190323	-0.191695	-0.193047	-0.19438	-0.195694	-0.196989	-0.198266	-0.199524	-0.200764	-0.201985	-0.203189	-0.204374	-0.205542	-0.206691	-0.207824	-0.208938	-0.210036	-0.211116	-0.21218	-0.213227	-0.214257	-0.21527	-0.216268	-0.217249	-0.218214	-0.219163	-0.220097
4	136	TRUE	40	0.00976436	0.00815923	0.00660239	0.0050939	0.00363379	0.00222209	0.000858825	-0.000455985	-0.00172233	-0.00294019	-0.00410959	-0.00523051	-0.00630299	-0.00732703	-0.00830268	-0.00922998	-0.010109	-0.0109397	-0.0117223	-0.0124568	-0.0131434	-0.0137821	-0.014373	-0.0149164	-0.0154123	-0.015861	-0.0162626	-0.0166174	-0.0169255	-0.0171873	-0.0174029	-0.0175727	-0.0176969	-0.017776	-0.0178101	-0.0177996	-0.0177451	-0.0176467	-0.017505	-0.0173203	-0.0170932	-0.0168241	-0.0165135	-0.0161619	-0.0157698	-0.0153379
5	136	TRUE	80	0.421595	0.421505	0.421371	0.421192	0.420969	0.420702	0.42039	0.420035	0.419635	0.419191	0.418704	0.418173	0.417598	0.41698	0.416319	0.415615	0.414867	0.414077	0.413245	0.41237	0.411453	0.410495	0.409494	0.408453	0.40737	0.406246	0.405081	0.403876	0.402631	0.401346	0.400022	0.398658	0.397254	0.395812	0.394331	0.392812	0.391255	0.38966	0.388027	0.386357	0.38465	0.382905	0.381124	0.379307	0.377453	0.375563
0	137	FALSE	20	-1.40708	-1.40419	-1.40125	-1.39827	-1.39523	-1.39214	-1.389	-1.38581	-1.38257	-1.37927	-1.37593	-1.37253	-1.36908	-1.36558	-1.36202	-1.35842	-1.35475	-1.35103	-1.34726	-1.34343	-1.33954	-1.3356	-1.3316	-1.32754	-1.32342	-1.31925	-1.31501	-1.31071	-1.30635	-1.30192	-1.29743	-1.29288	-1.28826	-1.28357	-1.27882	-1.27399	-1.2691	-1.26414	-1.2591	-1.25399	-1.2488	-1.24354	-1.2382	-1.23279	-1.22729	-1.22172
1	137	FALSE	40	4.24961	4.24335	4.23686	4.23015	4.2232	4.21604	4.20866	4.20106	4.19325	4.18523	4.177	4.16857	4.15993	4.1511	4.14207	4.13284	4.12342	4.11382	4.10402	4.09404	4.08388	4.07353	4.06301	4.05231	4.04143	4.03038	4.01915	4.00775	3.99619	3.98445	3.97254	3.96047	3.94823	3.93583	3.92327	3.91054	3.89764	3.88459	3.87137	3.85799	3.84445	3.83075	3.81689	3.80286	3.78868	3.77434
2	137	FALSE	80	-0.496282	-0.500401	-0.50442	-0.508342	-0.512167	-0.515898	-0.519536	-0.523082	-0.526538	-0.529905	-0.533186	-0.536382	-0.539494	-0.542525	-0.545476	-0.548348	-0.551145	-0.553866	-0.556516	-0.559094	-0.561604	-0.564047	-0.566425	-0.568739	-0.570993	-0.573187	-0.575323	-0.577405	-0.579433	-0.58141	-0.583337	-0.585217	-0.587051	-0.588841	-0.59059	-0.5923	-0.593971	-0.595607	-0.597208	-0.598778	-0.600317	-0.601829	-0.603313	-0.604773	-0.606211	-0.607627
3	137	TRUE	20	-0.80545	-0.806231	-0.806937	-0.807567	-0.808124	-0.808607	-0.809016	-0.809352	-0.809617	-0.809809	-0.809931	-0.809982	-0.809963	-0.809875	-0.809718	-0.809493	-0.809202	-0.808844	-0.80842	-0.807931	-0.807378	-0.806762	-0.806083	-0.805343	-0.804542	-0.80368	-0.80276	-0.801781	-0.800745	-0.799652	-0.798503	-0.7973	-0.796043	-0.794733	-0.793371	-0.791957	-0.790494	-0.788981	-0.787421	-0.785812	-0.784157	-0.782457	-0.780712	-0.778923	-0.777092	-0.775218
4	137	TRUE	40	-0.969094	-0.964032	-0.958921	-0.953762	-0.948555	-0.943301	-0.937999	-0.93265	-0.927255	-0.921814	-0.916326	-0.910794	-0.905216	-0.899594	-0.893927	-0.888217	-0.882463	-0.876666	-0.870827	-0.864946	-0.859023	-0.853058	-0.847053	-0.841007	-0.834921	-0.828796	-0.822631	-0.816428	-0.810186	-0.803907	-0.797589	-0.791235	-0.784844	-0.778416	-0.771953	-0.765454	-0.758919	-0.75235	-0.745747	-0.739109	-0.732437	-0.725732	-0.718994	-0.712224	-0.70542	-0.698585
5	137	TRUE	80	0.11874	0.113858	0.108986	0.104126	0.0992786	0.0944455	0.0896282	0.0848283	0.0800472	0.0752863	0.0705471	0.0658311	0.0611396	0.056474	0.0518358	0.0472263	0.0426468	0.0380987	0.0335832	0.0291017	0.0246553	0.0202452	0.0158728	0.011539	0.00724512	0.00299212	-0.00121892	-0.00538696	-0.00951105	-0.0135902	-0.0176236	-0.0216103	-0.0255495	-0.0294405	-0.0332824	-0.0370746	-0.0408165	-0.0445074	-0.0481468	-0.051734	-0.0552688	-0.0587505	-0.0621788	-0.0655534	-0.0688739	-0.07214
0	138	FALSE	20	-1.94716	-1.93669	-1.92619	-1.91568	-1.90515	-1.8946	-1.88404	-1.87345	-1.86285	-1.85223	-1.8416	-1.83095	-1.82028	-1.8096	-1.7989	-1.78819	-1.77746	-1.76672	-1.75597	-1.7452	-1.73441	-1.72361	-1.7128	-1.70198	-1.69114	-1.68029	-1.66942	-1.65854	-1.64765	-1.63675	-1.62583	-1.6149	-1.60396	-1.59301	-1.58204	-1.57107	-1.56007	-1.54907	-1.53806	-1.52703	-1.51599	-1.50494	-1.49388	-1.4828	-1.47171	-1.46062
1	138	FALSE	40	0.0821353	0.0883607	0.0945692	0.100761	0.106937	0.113098	0.119243	0.125375	0.131492	0.137596	0.143688	0.149767	0.155835	0.161892	0.167939	0.173977	0.180006	0.186026	0.19204	0.198047	0.204047	0.210043	0.216034	0.222022	0.228006	0.233989	0.239969	0.245949	0.251928	0.257908	0.263889	0.269872	0.275858	0.281846	0.287839	0.293835	0.299837	0.305844	0.311858	0.317877	0.323904	0.329939	0.335981	0.342032	0.348092	0.35416
2	138	FALSE	80	-0.431073	-0.42335	-0.415728	-0.408207	-0.400786	-0.393463	-0.38624	-0.379114	-0.372085	-0.365152	-0.358316	-0.351574	-0.344927	-0.338373	-0.331912	-0.325543	-0.319265	-0.313077	-0.30698	-0.300971	-0.295051	-0.289218	-0.283471	-0.277811	-0.272236	-0.266745	-0.261338	-0.256015	-0.250773	-0.245613	-0.240535	-0.235537	-0.230619	-0.22578	-0.221019	-0.216337	-0.211732	-0.207204	-0.202753	-0.198378	-0.194077	-0.189852	-0.185701	-0.181624	-0.17762	-0.173688
3	138	TRUE	20	-1.19533	-1.19073	-1.18614	-1.18157	-1.17701	-1.17246	-1.16793	-1.16342	-1.15891	-1.15442	-1.14994	-1.14547	-1.14102	-1.13658	-1.13215	-1.12773	-1.12332	-1.11893	-1.11454	-1.11017	-1.1058	-1.10145	-1.09711	-1.09277	-1.08845	-1.08413	-1.07982	-1.07552	-1.07123	-1.06695	-1.06268	-1.05841	-1.05415	-1.04989	-1.04564	-1.0414	-1.03716	-1.03293	-1.02871	-1.02449	-1.02027	-1.01606	-1.01185	-1.00765	-1.00345	-0.999251
4	138	TRUE	40	-0.789303	-0.784505	-0.779698	-0.774881	-0.770053	-0.765216	-0.76037	-0.755513	-0.750647	-0.745771	-0.740885	-0.73599	-0.731086	-0.726172	-0.721249	-0.716317	-0.711377	-0.706428	-0.70147	-0.696504	-0.69153	-0.686548	-0.681558	-0.67656	-0.671556	-0.666544	-0.661526	-0.656501	-0.65147	-0.646432	-0.641389	-0.636341	-0.631287	-0.626229	-0.621166	-0.616098	-0.611027	-0.605952	-0.600874	-0.595794	-0.59071	-0.585625	-0.580537	-0.575448	-0.570358	-0.565267
5	138	TRUE	80	-0.286855	-0.285568	-0.284275	-0.282976	-0.28167	-0.280359	-0.279041	-0.277717	-0.276387	-0.275051	-0.27371	-0.272362	-0.271008	-0.269649	-0.268284	-0.266913	-0.265537	-0.264156	-0.26277	-0.261379	-0.259983	-0.258582	-0.257178	-0.255769	-0.254356	-0.25294	-0.25152	-0.250098	-0.248672	-0.247244	-0.245815	-0.244383	-0.24295	-0.241516	-0.240081	-0.238645	-0.23721	-0.235775	-0.23434	-0.232907	-0.231475	-0.230046	-0.228618	-0.227193	-0.225772	-0.224353
0	139	FALSE	20	-2.38173	-2.36717	-2.35262	-2.33809	-2.32356	-2.30905	-2.29455	-2.28007	-2.26559	-2.25113	-2.23668	-2.22224	-2.20781	-2.19339	-2.17898	-2.16458	-2.15019	-2.13581	-2.12144	-2.10707	-2.09272	-2.07837	-2.06403	-2.0497	-2.03537	-2.02105	-2.00673	-1.99242	-1.97811	-1.96381	-1.94951	-1.93521	-1.92092	-1.90663	-1.89234	-1.87805	-1.86377	-1.84949	-1.83521	-1.82093	-1.80666	-1.79238	-1.77811	-1.76383	-1.74956	-1.73529
1	139	FALSE	40	-2.02507	-2.01516	-2.00517	-1.9951	-1.98496	-1.97474	-1.96444	-1.95406	-1.9436	-1.93306	-1.92244	-1.91173	-1.90094	-1.89007	-1.87911	-1.86807	-1.85694	-1.84573	-1.83443	-1.82305	-1.81158	-1.80002	-1.78837	-1.77664	-1.76482	-1.75291	-1.74091	-1.72882	-1.71665	-1.70439	-1.69204	-1.6796	-1.66708	-1.65446	-1.64176	-1.62897	-1.61609	-1.60312	-1.59007	-1.57692	-1.56369	-1.55037	-1.53696	-1.52346	-1.50988	-1.4962
2	139	FALSE	80	0.916299	0.905775	0.895224	0.884646	0.874043	0.863416	0.852767	0.842097	0.831409	0.820703	0.809981	0.799244	0.788496	0.777736	0.766968	0.756193	0.745412	0.734628	0.723842	0.713057	0.702274	0.691496	0.680724	0.669961	0.659208	0.648468	0.637742	0.627033	0.616343	0.605674	0.595028	0.584407	0.573814	0.56325	0.552718	0.542219	0.531756	0.521332	0.510948	0.500606	0.490308	0.480057	0.469856	0.459705	0.449607	0.439564
3	139	TRUE	20	-0.0866697	-0.0859572	-0.0852546	-0.0845617	-0.083878	-0.0832031	-0.0825367	-0.0818785	-0.0812281	-0.080585	-0.0799489	-0.0793194	-0.0786961	-0.0780787	-0.0774667	-0.0768599	-0.0762577	-0.0756599	-0.075066	-0.0744758	-0.0738888	-0.0733048	-0.0727233	-0.0721441	-0.0715669	-0.0709914	-0.0704172	-0.0698441	-0.0692719	-0.0687002	-0.068129	-0.0675578	-0.0669866	-0.0664151	-0.0658432	-0.0652707	-0.0646974	-0.0641232	-0.063548	-0.0629716	-0.062394	-0.061815	-0.0612345	-0.0606525	-0.0600689	-0.0594836
4	139	TRUE	40	0.475271	0.474308	0.473328	0.47233	0.471315	0.470283	0.469233	0.468166	0.467082	0.465979	0.46486	0.463723	0.462568	0.461396	0.460206	0.458999	0.457775	0.456533	0.455274	0.453998	0.452705	0.451396	0.450069	0.448726	0.447366	0.44599	0.444598	0.44319	0.441766	0.440327	0.438872	0.437402	0.435917	0.434418	0.432903	0.431374	0.429832	0.428275	0.426705	0.425121	0.423524	0.421914	0.420291	0.418656	0.417008	0.415349
5	139	TRUE	80	0.207604	0.207498	0.207397	0.207301	0.20721	0.207124	0.207041	0.206963	0.206888	0.206817	0.20675	0.206685	0.206623	0.206563	0.206506	0.206451	0.206398	0.206346	0.206295	0.206245	0.206196	0.206148	0.206099	0.206051	0.206002	0.205953	0.205903	0.205851	0.205798	0.205744	0.205688	0.205629	0.205569	0.205505	0.205439	0.205369	0.205296	0.205219	0.205138	0.205054	0.204964	0.20487	0.204772	0.204668	0.204558	0.204444
0	140	FALSE	20	-0.686469	-0.683597	-0.680762	-0.677964	-0.675204	-0.67248	-0.669792	-0.667141	-0.664527	-0.661949	-0.659406	-0.656899	-0.654428	-0.651991	-0.649589	-0.647222	-0.644888	-0.642588	-0.64032	-0.638086	-0.635883	-0.633712	-0.631572	-0.629462	-0.627382	-0.625332	-0.62331	-0.621316	-0.61935	-0.61741	-0.615496	-0.613607	-0.611742	-0.609902	-0.608084	-0.606289	-0.604514	-0.602761	-0.601027	-0.599311	-0.597614	-0.595934	-0.59427	-0.592621	-0.590986	-0.589365
1	140	FALSE	40	-0.230143	-0.235199	-0.240205	-0.24516	-0.250063	-0.254913	-0.25971	-0.264453	-0.269141	-0.273775	-0.278352	-0.282873	-0.287338	-0.291745	-0.296095	-0.300386	-0.30462	-0.308794	-0.31291	-0.316966	-0.320963	-0.324901	-0.328778	-0.332595	-0.336353	-0.34005	-0.343686	-0.347262	-0.350778	-0.354233	-0.357628	-0.360962	-0.364236	-0.367449	-0.370602	-0.373694	-0.376726	-0.379697	-0.382609	-0.38546	-0.388252	-0.390983	-0.393655	-0.396267	-0.398819	-0.401313
2	140	FALSE	80	-1.70564	-1.70324	-1.7008	-1.69832	-1.69579	-1.69322	-1.6906	-1.68793	-1.68521	-1.68245	-1.67963	-1.67677	-1.67385	-1.67089	-1.66787	-1.6648	-1.66168	-1.6585	-1.65527	-1.65199	-1.64865	-1.64526	-1.64181	-1.63831	-1.63475	-1.63113	-1.62746	-1.62373	-1.61994	-1.61609	-1.61219	-1.60823	-1.6042	-1.60012	-1.59598	-1.59179	-1.58753	-1.58321	-1.57884	-1.5744	-1.56991	-1.56536	-1.56074	-1.55607	-1.55134	-1.54655
3	140	TRUE	20	-0.0710858	-0.0707386	-0.0703869	-0.07003	-0.069667	-0.0692971	-0.0689195	-0.0685335	-0.0681381	-0.0677329	-0.0673169	-0.0668896	-0.0664502	-0.0659982	-0.065533	-0.0650538	-0.0645603	-0.0640518	-0.0635278	-0.062988	-0.0624318	-0.0618588	-0.0612686	-0.060661	-0.0600355	-0.0593919	-0.0587298	-0.0580492	-0.0573497	-0.0566312	-0.0558936	-0.0551367	-0.0543605	-0.0535649	-0.0527499	-0.0519154	-0.0510616	-0.0501884	-0.049296	-0.0483845	-0.047454	-0.0465047	-0.0455368	-0.0445504	-0.0435459	-0.0425235
4	140	TRUE	40	0.129143	0.13085	0.132538	0.134209	0.135862	0.137496	0.139113	0.140712	0.142292	0.143855	0.145399	0.146925	0.148434	0.149924	0.151396	0.15285	0.154286	0.155705	0.157106	0.158489	0.159854	0.161202	0.162533	0.163846	0.165142	0.166421	0.167683	0.168928	0.170156	0.171368	0.172563	0.173742	0.174904	0.176051	0.177181	0.178296	0.179395	0.180478	0.181546	0.182598	0.183636	0.184658	0.185666	0.186659	0.187637	0.188601
5	140	TRUE	80	-0.337303	-0.334167	-0.331027	-0.327884	-0.324736	-0.321586	-0.318434	-0.31528	-0.312126	-0.30897	-0.305815	-0.302659	-0.299505	-0.296352	-0.2932	-0.290051	-0.286904	-0.28376	-0.280619	-0.277481	-0.274347	-0.271217	-0.268091	-0.26497	-0.261853	-0.258741	-0.255634	-0.252533	-0.249437	-0.246346	-0.243261	-0.240181	-0.237108	-0.23404	-0.230978	-0.227922	-0.224872	-0.221828	-0.21879	-0.215758	-0.212732	-0.209712	-0.206698	-0.203689	-0.200687	-0.19769
0	142	FALSE	20	-0.0651848	-0.0912864	-0.11715	-0.142775	-0.168161	-0.193306	-0.218211	-0.242875	-0.267297	-0.291475	-0.31541	-0.3391	-0.362545	-0.385744	-0.408696	-0.4314	-0.453855	-0.47606	-0.498015	-0.519718	-0.541168	-0.562365	-0.583307	-0.603994	-0.624424	-0.644596	-0.66451	-0.684164	-0.703557	-0.722688	-0.741556	-0.76016	-0.778498	-0.79657	-0.814373	-0.831908	-0.849171	-0.866163	-0.882882	-0.899326	-0.915494	-0.931386	-0.946998	-0.962331	-0.977383	-0.992153
1	142	FALSE	40	5.18822	5.16222	5.13616	5.11002	5.08383	5.05758	5.03127	5.00492	4.97851	4.95207	4.92559	4.89907	4.87251	4.84593	4.81933	4.7927	4.76606	4.7394	4.71274	4.68607	4.65939	4.63272	4.60605	4.57938	4.55273	4.5261	4.49948	4.47288	4.44631	4.41977	4.39326	4.36678	4.34035	4.31395	4.2876	4.26129	4.23504	4.20884	4.18269	4.1566	4.13058	4.10462	4.07873	4.05291	4.02716	4.00149
2	142	FALSE	80	-0.327711	-0.308124	-0.289	-0.270341	-0.252146	-0.234417	-0.217155	-0.200358	-0.184028	-0.168165	-0.152767	-0.137834	-0.123366	-0.109362	-0.095821	-0.0827413	-0.0701218	-0.0579613	-0.046258	-0.0350103	-0.0242165	-0.0138747	-0.00398313	0.00546029	0.0144575	0.0230106	0.0311217	0.0387928	0.0460262	0.052824	0.0591883	0.0651214	0.0706255	0.0757028	0.0803555	0.084586	0.0883965	0.0917893	0.0947668	0.0973313	0.0994852	0.101231	0.102571	0.103508	0.104044	0.104182
3	142	TRUE	20	0.0705101	0.0709747	0.0714636	0.0719758	0.0725104	0.0730665	0.0736432	0.0742394	0.0748544	0.0754871	0.0761366	0.0768021	0.0774826	0.0781772	0.078885	0.0796051	0.0803366	0.0810787	0.0818305	0.0825911	0.0833596	0.0841352	0.084917	0.0857043	0.0864961	0.0872918	0.0880904	0.0888911	0.0896932	0.090496	0.0912985	0.0921001	0.0929	0.0936975	0.0944919	0.0952824	0.0960683	0.0968491	0.0976238	0.098392	0.099153	0.0999061	0.100651	0.101386	0.102112	0.102828
4	142	TRUE	40	0.587479	0.58164	0.575797	0.569951	0.564103	0.558254	0.552405	0.546557	0.540711	0.534867	0.529026	0.52319	0.517359	0.511533	0.505714	0.499903	0.4941	0.488305	0.482521	0.476746	0.470983	0.465231	0.459492	0.453766	0.448054	0.442356	0.436673	0.431006	0.425355	0.419721	0.414104	0.408506	0.402926	0.397366	0.391825	0.386305	0.380807	0.375329	0.369874	0.364442	0.359033	0.353648	0.348287	0.342952	0.337641	0.332357
5	142	TRUE	80	0.644574	0.641701	0.638852	0.636028	0.633227	0.63045	0.627695	0.624963	0.622252	0.619562	0.616892	0.614242	0.61161	0.608996	0.606399	0.603818	0.601252	0.598701	0.596162	0.593635	0.59112	0.588615	0.586118	0.583629	0.581147	0.57867	0.576198	0.573729	0.571261	0.568794	0.566327	0.563858	0.561387	0.558911	0.55643	0.553942	0.551447	0.548943	0.546429	0.543904	0.541366	0.538815	0.53625	0.533669	0.531072	0.528457
0	143	FALSE	20	0.328047	0.333759	0.339428	0.345052	0.350628	0.356152	0.361622	0.367035	0.372387	0.377678	0.382903	0.388061	0.39315	0.398167	0.403111	0.407981	0.412773	0.417488	0.422123	0.426678	0.431151	0.435542	0.439849	0.444073	0.448212	0.452266	0.456234	0.460118	0.463916	0.467628	0.471255	0.474796	0.478253	0.481625	0.484913	0.488117	0.491238	0.494276	0.497232	0.500107	0.502901	0.505616	0.508251	0.510808	0.513287	0.515689
1	143	FALSE	40	0.970826	0.958226	0.945693	0.933229	0.920833	0.908506	0.896249	0.884061	0.871942	0.859893	0.847913	0.836003	0.824161	0.812389	0.800685	0.789048	0.77748	0.765978	0.754543	0.743173	0.731868	0.720627	0.70945	0.698335	0.687281	0.676288	0.665355	0.65448	0.643662	0.6329	0.622194	0.611541	0.600942	0.590395	0.579898	0.569451	0.559052	0.548702	0.538397	0.528139	0.517924	0.507754	0.497626	0.487541	0.477496	0.467492
2	143	FALSE	80	0.166697	0.169337	0.171959	0.174566	0.177155	0.179728	0.182284	0.184824	0.187348	0.189855	0.192345	0.194819	0.197275	0.199715	0.202137	0.204542	0.206928	0.209297	0.211647	0.213978	0.21629	0.218582	0.220854	0.223106	0.225337	0.227546	0.229733	0.231899	0.234041	0.23616	0.238255	0.240326	0.242372	0.244394	0.246389	0.248358	0.250301	0.252216	0.254104	0.255964	0.257796	0.259599	0.261372	0.263116	0.264831	0.266514
3	143	TRUE	20	0.307304	0.303827	0.300365	0.296918	0.293488	0.290075	0.286681	0.283307	0.279954	0.276623	0.273316	0.270033	0.266775	0.263544	0.260339	0.257163	0.254015	0.250897	0.24781	0.244753	0.241729	0.238737	0.235778	0.232854	0.229963	0.227108	0.224288	0.221505	0.218757	0.216047	0.213374	0.210739	0.208142	0.205584	0.203064	0.200583	0.198142	0.19574	0.193378	0.191056	0.188774	0.186533	0.184332	0.182171	0.180052	0.177974
4	143	TRUE	40	-0.191787	-0.190569	-0.189359	-0.188157	-0.186965	-0.185783	-0.184611	-0.18345	-0.1823	-0.181162	-0.180036	-0.178923	-0.177823	-0.176736	-0.175663	-0.174605	-0.17356	-0.17253	-0.171515	-0.170516	-0.169531	-0.168562	-0.167608	-0.16667	-0.165748	-0.164841	-0.16395	-0.163075	-0.162215	-0.16137	-0.160541	-0.159727	-0.158929	-0.158145	-0.157375	-0.15662	-0.155879	-0.155152	-0.154439	-0.153739	-0.153052	-0.152378	-0.151716	-0.151066	-0.150428	-0.149801
5	143	TRUE	80	-0.311426	-0.30925	-0.307102	-0.304983	-0.302892	-0.30083	-0.298796	-0.296792	-0.294816	-0.292869	-0.290951	-0.289062	-0.287202	-0.28537	-0.283567	-0.281793	-0.280047	-0.278329	-0.276639	-0.274978	-0.273344	-0.271738	-0.270159	-0.268608	-0.267083	-0.265586	-0.264115	-0.262671	-0.261253	-0.259862	-0.258496	-0.257155	-0.25584	-0.25455	-0.253286	-0.252046	-0.25083	-0.249639	-0.248472	-0.247329	-0.24621	-0.245114	-0.244041	-0.242992	-0.241965	-0.24096
0	144	FALSE	20	0.26173	0.269142	0.27646	0.283685	0.290815	0.29785	0.304788	0.31163	0.318373	0.325017	0.33156	0.338003	0.344344	0.350581	0.356715	0.362743	0.368665	0.37448	0.380186	0.385783	0.39127	0.396645	0.401907	0.407056	0.41209	0.417009	0.421812	0.426497	0.431064	0.435512	0.43984	0.444048	0.448134	0.452099	0.455941	0.459661	0.463256	0.466728	0.470076	0.473299	0.476397	0.479369	0.482217	0.484939	0.487536	0.490007
1	144	FALSE	40	-0.398982	-0.401751	-0.404541	-0.40735	-0.410174	-0.413011	-0.415857	-0.41871	-0.421566	-0.424423	-0.427278	-0.430128	-0.432969	-0.4358	-0.438618	-0.44142	-0.444203	-0.446964	-0.449702	-0.452414	-0.455097	-0.457748	-0.460367	-0.46295	-0.465495	-0.468001	-0.470464	-0.472884	-0.475259	-0.477586	-0.479863	-0.48209	-0.484265	-0.486385	-0.48845	-0.490459	-0.492409	-0.494299	-0.49613	-0.497898	-0.499604	-0.501246	-0.502823	-0.504335	-0.505781	-0.507159
2	144	FALSE	80	0.696528	0.691585	0.686588	0.681539	0.67644	0.671292	0.666099	0.660861	0.655581	0.650261	0.644905	0.639513	0.63409	0.628636	0.623156	0.617652	0.612127	0.606583	0.601023	0.59545	0.589868	0.584279	0.578686	0.573092	0.5675	0.561913	0.556334	0.550767	0.545214	0.539678	0.534162	0.528669	0.523202	0.517764	0.512358	0.506987	0.501653	0.496359	0.491108	0.485903	0.480746	0.475639	0.470586	0.465588	0.460648	0.455768
3	144	TRUE	20	-0.475214	-0.474622	-0.474015	-0.473392	-0.472751	-0.472093	-0.471417	-0.470721	-0.470005	-0.469268	-0.46851	-0.467729	-0.466925	-0.466097	-0.465245	-0.464367	-0.463463	-0.462533	-0.461576	-0.460591	-0.459577	-0.458535	-0.457463	-0.456362	-0.455229	-0.454066	-0.452872	-0.451646	-0.450388	-0.449098	-0.447775	-0.446419	-0.44503	-0.443608	-0.442153	-0.440663	-0.439141	-0.437584	-0.435994	-0.434371	-0.432714	-0.431023	-0.4293	-0.427543	-0.425754	-0.423932
4	144	TRUE	40	-0.165435	-0.16829	-0.171117	-0.173915	-0.176685	-0.179425	-0.182136	-0.184818	-0.187471	-0.190093	-0.192686	-0.195248	-0.19778	-0.200281	-0.202751	-0.20519	-0.207597	-0.209972	-0.212314	-0.214624	-0.2169	-0.219142	-0.22135	-0.223522	-0.22566	-0.227761	-0.229825	-0.231851	-0.23384	-0.23579	-0.2377	-0.239569	-0.241398	-0.243184	-0.244928	-0.246628	-0.248283	-0.249893	-0.251457	-0.252974	-0.254442	-0.255861	-0.257229	-0.258547	-0.259812	-0.261025
5	144	TRUE	80	-0.395424	-0.396054	-0.39671	-0.39739	-0.398095	-0.398823	-0.399575	-0.40035	-0.401147	-0.401966	-0.402805	-0.403666	-0.404546	-0.405446	-0.406365	-0.407302	-0.408257	-0.409229	-0.410217	-0.41122	-0.412239	-0.413272	-0.414318	-0.415378	-0.416449	-0.417532	-0.418625	-0.419729	-0.420841	-0.421962	-0.423091	-0.424226	-0.425368	-0.426515	-0.427666	-0.428821	-0.429978	-0.431138	-0.432299	-0.433461	-0.434622	-0.435783	-0.436941	-0.438097	-0.439249	-0.440397
0	146	FALSE	20	-0.40555	-0.403072	-0.400643	-0.398264	-0.395934	-0.393653	-0.391422	-0.389242	-0.387111	-0.385032	-0.383003	-0.381024	-0.379097	-0.37722	-0.375395	-0.37362	-0.371896	-0.370223	-0.368601	-0.367029	-0.365508	-0.364038	-0.362617	-0.361247	-0.359927	-0.358657	-0.357436	-0.356264	-0.355142	-0.354068	-0.353043	-0.352066	-0.351137	-0.350256	-0.349421	-0.348634	-0.347894	-0.347199	-0.346551	-0.345948	-0.34539	-0.344877	-0.344409	-0.343984	-0.343603	-0.343265
1	146	FALSE	40	1.09697	1.09388	1.09074	1.08755	1.08431	1.08102	1.07768	1.0743	1.07086	1.06737	1.06383	1.06025	1.05661	1.05292	1.04918	1.0454	1.04156	1.03767	1.03373	1.02975	1.02571	1.02162	1.01748	1.01329	1.00905	1.00477	1.00043	0.996038	0.9916	0.987112	0.982574	0.977986	0.973349	0.968663	0.963927	0.959143	0.954309	0.949427	0.944496	0.939516	0.934489	0.929413	0.92429	0.919119	0.913901	0.908637
2	146	FALSE	80	2.37242	2.34955	2.32667	2.30376	2.28084	2.25791	2.23497	2.21202	2.18907	2.16612	2.14317	2.12023	2.09729	2.07436	2.05144	2.02854	2.00566	1.98279	1.95995	1.93714	1.91435	1.8916	1.86888	1.84619	1.82355	1.80095	1.77839	1.75588	1.73341	1.711	1.68865	1.66635	1.64411	1.62193	1.59982	1.57777	1.5558	1.53389	1.51206	1.4903	1.46862	1.44702	1.4255	1.40406	1.38271	1.36145
3	146	TRUE	20	0.399425	0.401801	0.40417	0.406531	0.408883	0.411225	0.413557	0.415877	0.418186	0.420483	0.422766	0.425036	0.427291	0.429531	0.431755	0.433963	0.436153	0.438326	0.44048	0.442615	0.44473	0.446824	0.448897	0.450949	0.452977	0.454983	0.456965	0.458923	0.460856	0.462763	0.464643	0.466497	0.468324	0.470122	0.471892	0.473633	0.475344	0.477024	0.478674	0.480292	0.481879	0.483433	0.484954	0.486442	0.487896	0.489316
[truncated: 32 more rows]
[truncated: 3,454 more columns]

## Sheet: panel B conservative
	subject	correct	frequency	0	1	2	3	4	5	6	7	8	9	10	11	12	13	14	15	16	17	18	19	20	21	22	23	24	25	26	27	28	29	30	31	32	33	34	35	36	37	38	39	40	41	42	43	44	45
[truncated: 282 more rows]
[truncated: 3,454 more columns]

## Sheet: panel B nuisance
	subject	correct	frequency	0	1	2	3	4	5	6	7	8	9	10	11	12	13	14	15	16	17	18	19	20	21	22	23	24	25	26	27	28	29	30	31	32	33	34	35	36	37	38	39	40	41	42	43	44	45
[truncated: 282 more rows]
[truncated: 3,454 more columns]
