# Supplementary material for: Pupil dilation offers a time-window on prediction error
Source: eLife. 2026 Jan 8;14:RP105287. doi: 10.7554/eLife.105287 (PMC12782557; doi:10.7554/eLife.105287)
Supplement: Figure 1—figure supplement 1—source data 1. [file elife-105287-fig1-figsupp1-data1.xlsx]

## Sheet: panel A
	subject	0	1	2	3	4	5	6	7	8	9	10	11	12	13	14	15	16	17	18	19	20	21	22	23	24	25	26	27	28	29	30	31	32	33	34	35	36	37	38	39	40	41	42	43	44	45	46	47
0	sub-1	-0.0198325	-0.0199951	-0.0203271	-0.0208233	-0.0214779	-0.0222841	-0.0232346	-0.0243214	-0.0255357	-0.0268682	-0.028309	-0.0298477	-0.0314734	-0.0331746	-0.0349396	-0.0367564	-0.0386127	-0.0404959	-0.0423936	-0.0442931	-0.046182	-0.0480479	-0.0498788	-0.0516628	-0.0533885	-0.0550449	-0.0566213	-0.0581078	-0.0594947	-0.0607731	-0.0619349	-0.0629724	-0.0638789	-0.0646481	-0.0651487	-0.0656288	-0.0659583	-0.0661344	-0.0660286	-0.0658924	-0.0655989	-0.0651481	-0.064541	-0.0637792	-0.0628648	-0.0618006	-0.0605899	-0.0592364
0	sub-4	0.184032	0.184112	0.184226	0.184372	0.184546	0.184744	0.184963	0.185196	0.185439	0.185686	0.185932	0.18617	0.186393	0.186597	0.186774	0.186917	0.187021	0.18708	0.187087	0.187038	0.186926	0.186748	0.186499	0.186175	0.185773	0.185291	0.184726	0.184076	0.183342	0.182523	0.181619	0.180633	0.179565	0.178419	0.177198	0.175906	0.174546	0.173124	0.171645	0.170113	0.168536	0.166918	0.165265	0.163584	0.16188	0.160159	0.158427	0.156688
0	sub-5	-0.243215	-0.243141	-0.243084	-0.243008	-0.24291	-0.242754	-0.2426	-0.242412	-0.242188	-0.241923	-0.241615	-0.241261	-0.240858	-0.240341	-0.239832	-0.239265	-0.238639	-0.237951	-0.237168	-0.236351	-0.235467	-0.234514	-0.233491	-0.232397	-0.231231	-0.229963	-0.228653	-0.22727	-0.225814	-0.224286	-0.222684	-0.221011	-0.219267	-0.217451	-0.215564	-0.213609	-0.211584	-0.209462	-0.207304	-0.205082	-0.202798	-0.200452	-0.198049	-0.19559	-0.193078	-0.190517	-0.187879	-0.185231
0	sub-7	0.0687853	0.0676364	0.0664771	0.0653066	0.0641238	0.0629277	0.0617169	0.0604901	0.0592457	0.0579822	0.0566982	0.055392	0.0540622	0.0527074	0.0513266	0.0499186	0.0484827	0.0470183	0.045525	0.0440029	0.042452	0.0408728	0.0392659	0.0376323	0.035973	0.0342893	0.0325827	0.0308549	0.0291075	0.0273424	0.0255616	0.023767	0.0219606	0.0201444	0.0183203	0.0164903	0.0146563	0.0128201	0.0109833	0.00914751	0.00731415	0.00548448	0.00365956	0.00184024	2.71859e-05	-0.00177918	0.0019537	0.000155684
0	sub-9	0.109899	0.108188	0.106561	0.105017	0.103551	0.102161	0.100843	0.0995924	0.098406	0.0972789	0.0962066	0.0951842	0.0942069	0.0932698	0.0923679	0.0914963	0.0906503	0.0898249	0.0890156	0.0882179	0.0874275	0.0866401	0.0858517	0.0850586	0.084257	0.0834437	0.0826155	0.0817694	0.0809028	0.0800132	0.0790984	0.0781564	0.0771854	0.0761838	0.0751503	0.0740835	0.0729826	0.0718466	0.0706749	0.0694672	0.0682231	0.0669427	0.0656262	0.0642742	0.0628873	0.0614665	0.0600133	0.058529
0	sub-10	-0.200528	-0.197488	-0.194469	-0.191472	-0.188496	-0.18554	-0.182602	-0.179683	-0.17678	-0.173892	-0.171017	-0.168155	-0.165302	-0.162457	-0.15962	-0.156786	-0.153956	-0.151127	-0.148297	-0.145464	-0.142628	-0.139785	-0.136936	-0.134078	-0.13121	-0.128332	-0.125442	-0.122541	-0.119626	-0.116699	-0.113759	-0.110807	-0.107843	-0.104868	-0.101882	-0.0988875	-0.095885	-0.0928759	-0.0898617	-0.0868439	-0.0838238	-0.080803	-0.0777828	-0.0747645	-0.0717491	-0.0687377	-0.0657308	-0.0627292
0	sub-11	0.0777003	0.0790858	0.0804921	0.0819218	0.0833771	0.0848602	0.0863726	0.0879159	0.089491	0.0910986	0.092739	0.0944121	0.0961174	0.0978541	0.0996208	0.101416	0.103237	0.105082	0.106948	0.10883	0.110726	0.11263	0.114538	0.116445	0.118344	0.12023	0.12433	0.126165	0.127966	0.129727	0.13144	0.133098	0.134692	0.136217	0.137663	0.139024	0.140293	0.141464	0.142528	0.143482	0.144318	0.145033	0.145621	0.146078	0.146402	0.14659	0.14664	0.14655
0	sub-12	-0.20912	-0.207375	-0.205601	-0.203796	-0.201961	-0.200093	-0.196247	-0.194314	-0.192346	-0.190342	-0.188303	-0.186227	-0.184113	-0.181963	-0.179775	-0.175604	-0.173343	-0.171044	-0.168708	-0.166336	-0.163927	-0.161483	-0.159005	-0.156493	-0.152004	-0.149431	-0.146828	-0.144198	-0.141542	-0.138862	-0.136159	-0.133438	-0.128753	-0.126002	-0.123238	-0.120465	-0.117687	-0.114905	-0.112124	-0.109347	-0.106577	-0.103818	-0.101072	-0.0983445	-0.0956374	-0.0929541	-0.0902977	-0.0876711
0	sub-13	0.292463	0.289995	0.287519	0.285038	0.282554	0.28007	0.277589	0.275113	0.272645	0.270185	0.267737	0.265301	0.262879	0.260472	0.258081	0.255706	0.253348	0.251008	0.248684	0.246378	0.244087	0.241812	0.239551	0.237303	0.235066	0.232841	0.230624	0.228415	0.226211	0.224013	0.221817	0.219624	0.217433	0.215241	0.21305	0.210858	0.209098	0.206904	0.205142	0.202944	0.200745	0.198979	0.196778	0.194576	0.192374	0.190171	0.187968	0.185765
0	sub-14	0.101473	0.0995274	0.0974072	0.0951161	0.0926585	0.0900401	0.0872672	0.0843468	0.0812866	0.0780951	0.0747811	0.0713541	0.067824	0.0642012	0.0604962	0.0567199	0.0528836	0.0489986	0.0450763	0.0411286	0.0371671	0.0332036	0.0292501	0.0253181	0.0214196	0.017566	0.0137688	0.0100392	0.00638798	0.00282575	-0.000637417	-0.00399192	-0.00722873	-0.0103394	-0.0133162	-0.0161522	-0.018841	-0.0213773	-0.0237565	-0.0259751	-0.0280302	-0.0299202	-0.0316444	-0.0332029	-0.0345968	-0.0358285	-0.0369008	-0.0378179
0	sub-15	-0.201429	-0.19963	-0.197859	-0.196116	-0.1944	-0.192712	-0.191054	-0.189428	-0.187838	-0.186287	-0.18478	-0.183322	-0.181919	-0.180578	-0.179305	-0.178107	-0.176989	-0.175956	-0.175014	-0.174164	-0.173411	-0.172756	-0.172198	-0.171739	-0.171377	-0.171111	-0.170941	-0.170864	-0.17088	-0.170988	-0.171187	-0.171475	-0.171853	-0.17232	-0.172878	-0.173527	-0.174269	-0.175108	-0.176046	-0.177088	-0.178237	-0.179498	-0.180876	-0.182375	-0.184002	-0.185762	-0.187661	-0.189706
0	sub-16	-0.534111	-0.530536	-0.52689	-0.523174	-0.519392	-0.515545	-0.511634	-0.507662	-0.503632	-0.499546	-0.495406	-0.491215	-0.486975	-0.48269	-0.478361	-0.473993	-0.469587	-0.465147	-0.460676	-0.456177	-0.451653	-0.447107	-0.442542	-0.437961	-0.433368	-0.428766	-0.424157	-0.419545	-0.414933	-0.410325	-0.405722	-0.401129	-0.396548	-0.391981	-0.387431	-0.3829	-0.378391	-0.373906	-0.369445	-0.36501	-0.360602	-0.356222	-0.351869	-0.347545	-0.343247	-0.338976	-0.33473	-0.330508
0	sub-18	-0.136307	-0.133891	-0.131545	-0.129272	-0.127056	-0.124932	-0.122886	-0.120918	-0.119013	-0.117205	-0.115478	-0.113832	-0.112268	-0.110786	-0.109385	-0.108065	-0.106824	-0.105662	-0.104577	-0.103567	-0.102614	-0.101747	-0.100948	-0.100213	-0.0995397	-0.098924	-0.0983461	-0.0978351	-0.0973702	-0.0969471	-0.0965449	-0.0961918	-0.0958666	-0.0955643	-0.0952802	-0.0949932	-0.0947151	-0.0944582	-0.0941686	-0.0939082	-0.09364	-0.0933598	-0.0930639	-0.0927484	-0.0924095	-0.0920436	-0.0916307	-0.0912003
0	sub-19	-0.14195	-0.141603	-0.141247	-0.140706	-0.140332	-0.139947	-0.139549	-0.139137	-0.138711	-0.138269	-0.137809	-0.137332	-0.136835	-0.136317	-0.1356	-0.135037	-0.134272	-0.133658	-0.133015	-0.132342	-0.131637	-0.130899	-0.130124	-0.129312	-0.12846	-0.127566	-0.126627	-0.125466	-0.124433	-0.12335	-0.122214	-0.121022	-0.119599	-0.118293	-0.116752	-0.115327	-0.11384	-0.112291	-0.110502	-0.108828	-0.107091	-0.105292	-0.103433	-0.101514	-0.0995375	-0.0975059	-0.0954214	-0.093287
0	sub-20	-0.102413	-0.10355	-0.104626	-0.105639	-0.10659	-0.107478	-0.108303	-0.109067	-0.109718	-0.11036	-0.110942	-0.111465	-0.11193	-0.112337	-0.112688	-0.112984	-0.113227	-0.113416	-0.113555	-0.113643	-0.113684	-0.113677	-0.113625	-0.113477	-0.113339	-0.113161	-0.112944	-0.112691	-0.112402	-0.112029	-0.111677	-0.111296	-0.110835	-0.110402	-0.109893	-0.109415	-0.108916	-0.1084	-0.107866	-0.107318	-0.106755	-0.106179	-0.105591	-0.104992	-0.104383	-0.103765	-0.103138	-0.102503
0	sub-21	-0.393341	-0.387476	-0.381706	-0.376031	-0.370452	-0.364968	-0.35958	-0.354288	-0.349089	-0.343985	-0.338973	-0.334053	-0.329224	-0.324485	-0.319834	-0.315271	-0.310795	-0.306405	-0.302101	-0.297882	-0.29375	-0.289702	-0.28574	-0.281865	-0.278075	-0.274373	-0.270758	-0.267231	-0.263794	-0.260446	-0.257188	-0.254022	-0.250949	-0.247969	-0.245082	-0.24229	-0.239592	-0.236989	-0.23448	-0.232066	-0.229744	-0.227515	-0.225377	-0.22333	-0.221371	-0.219498	-0.21771	-0.216003
0	sub-23	0.179491	0.177244	0.17497	0.172666	0.170329	0.167954	0.165537	0.163077	0.160569	0.158011	0.155401	0.152736	0.150015	0.147236	0.144397	0.141498	0.138538	0.135516	0.132487	0.129342	0.126137	0.122872	0.119601	0.11622	0.112783	0.109292	0.105751	0.102162	0.0985293	0.0948555	0.0911453	0.0874572	0.0836876	0.079896	0.0760879	0.0722691	0.0684457	0.0646238	0.06081	0.0570111	0.0532337	0.0494847	0.0457712	0.0420998	0.0384774	0.0349105	0.0314056	0.0280228
0	sub-24	0.00341568	0.00665767	0.00992333	0.0132096	0.0165142	0.0198357	0.0231736	0.0265281	0.0299005	0.0332926	0.036707	0.0401734	0.043643	0.0471466	0.0506889	0.0542753	0.057911	0.0616018	0.0653531	0.0691704	0.0730591	0.077024	0.0810699	0.085201	0.0894211	0.0937335	0.0981408	0.102645	0.107247	0.111947	0.116743	0.121635	0.126619	0.131692	0.136848	0.142082	0.147413	0.152779	0.158225	0.163688	0.169184	0.1747	0.180225	0.185771	0.191272	0.196741	0.202163	0.207524
0	sub-25	-0.229446	-0.228306	-0.227095	-0.22581	-0.22445	-0.223015	-0.221504	-0.219918	-0.218258	-0.215803	-0.214001	-0.212131	-0.210196	-0.208199	-0.206143	-0.204032	-0.20187	-0.19966	-0.197407	-0.195114	-0.192785	-0.190424	-0.188034	-0.185619	-0.183181	-0.180724	-0.17825	-0.175763	-0.173263	-0.170754	-0.168238	-0.165715	-0.163188	-0.160658	-0.158125	-0.15559	-0.153054	-0.150517	-0.147979	-0.14544	-0.142899	-0.140357	-0.137812	-0.135266	-0.132718	-0.130167	-0.126893	-0.124342
0	sub-26	0.186065	0.183318	0.181196	0.178489	0.175801	0.173128	0.17047	0.167823	0.165789	0.163155	0.160523	0.157892	0.155257	0.152615	0.149963	0.147297	0.144615	0.141913	0.139793	0.137041	0.134262	0.131453	0.128612	0.125739	0.122832	0.119892	0.116917	0.11391	0.110871	0.107803	0.104707	0.101587	0.0984457	0.0952878	0.0921176	0.0895437	0.0863616	0.0831828	0.0800133	0.076859	0.0737265	0.0706221	0.0675524	0.0645243	0.0615443	0.058619	0.055755	0.0529585
0	sub-27	-0.0422411	-0.0423059	-0.0423389	-0.0423402	-0.04231	-0.0422489	-0.0421572	-0.0420355	-0.0418846	-0.041705	-0.0414975	-0.0412626	-0.041001	-0.0407132	-0.0403998	-0.0400612	-0.0396978	-0.0393102	-0.0388987	-0.0384637	-0.0380056	-0.0375247	-0.0370214	-0.0364961	-0.0359487	-0.0353796	-0.0347886	-0.0341757	-0.0335405	-0.0328827	-0.0322018	-0.0314972	-0.0307685	-0.030015	-0.0292362	-0.0284316	-0.0276009	-0.026744	-0.0258608	-0.0249515	-0.0240165	-0.0230566	-0.0220728	-0.0210661	-0.0200382	-0.018991	-0.0179265	-0.0168473
0	sub-31	-0.448958	-0.445183	-0.44139	-0.437574	-0.433729	-0.429854	-0.425943	-0.421993	-0.418	-0.413962	-0.409875	-0.405736	-0.401543	-0.397294	-0.392987	-0.388619	-0.38419	-0.379698	-0.375143	-0.370525	-0.365844	-0.3611	-0.356295	-0.35143	-0.346506	-0.341525	-0.336489	-0.331401	-0.326263	-0.321079	-0.315851	-0.310582	-0.305277	-0.299939	-0.294573	-0.289181	-0.28377	-0.278342	-0.272903	-0.267457	-0.262008	-0.256561	-0.251122	-0.245694	-0.240283	-0.234893	-0.22953	-0.224198
0	sub-32	-0.624369	-0.623549	-0.622728	-0.621904	-0.621078	-0.620246	-0.619406	-0.618556	-0.617693	-0.616812	-0.615909	-0.614981	-0.613435	-0.612439	-0.611399	-0.610308	-0.609159	-0.607358	-0.605485	-0.604115	-0.602652	-0.601085	-0.599404	-0.597597	-0.595654	-0.592977	-0.590728	-0.588307	-0.585703	-0.582903	-0.579311	-0.576089	-0.57264	-0.568368	-0.564438	-0.560253	-0.555807	-0.550507	-0.545522	-0.54026	-0.534718	-0.528309	-0.522208	-0.515827	-0.509172	-0.502246	-0.495057	-0.487613
0	sub-33	0.0723611	0.0730488	0.0740341	0.075298	0.0768198	0.0785769	0.0805454	0.0826996	0.0850123	0.0874555	0.0899996	0.0926143	0.0952685	0.0979304	0.100568	0.103148	0.105639	0.108007	0.110223	0.112253	0.114067	0.115636	0.11693	0.117921	0.118582	0.118887	0.118812	0.118334	0.117432	0.116086	0.114278	0.111993	0.109218	0.10594	0.102152	0.0978465	0.093019	0.0876676	0.0817928	0.0753969	0.0686728	0.0612505	0.0533278	0.0449154	0.0360262	0.0266748	0.0168782	0.00665482
[truncated: 1,702 more columns]

## Sheet: panel B
	subject	correct	0	1	2	3	4	5	6	7	8	9	10	11	12	13	14	15	16	17	18	19	20	21	22	23	24	25	26	27	28	29	30	31	32	33	34	35	36	37	38	39	40	41	42	43	44	45	46
0	sub-1	0	-0.056661	-0.0560083	-0.0555225	-0.0552066	-0.0550628	-0.0550921	-0.0552949	-0.0556704	-0.0562166	-0.0569304	-0.0578076	-0.0588426	-0.0600284	-0.061357	-0.062819	-0.0644039	-0.0660999	-0.0678945	-0.0697739	-0.0717239	-0.0737294	-0.0757746	-0.0778435	-0.0799196	-0.0819864	-0.084027	-0.086025	-0.0879637	-0.089827	-0.091599	-0.0932645	-0.0948089	-0.0962184	-0.09748	-0.0981669	-0.0990992	-0.0998514	-0.100415	-0.100784	-0.100951	-0.100914	-0.100668	-0.100214	-0.0995502	-0.0986792	-0.0976036	-0.0963277
1	sub-1	1	-0.00373701	-0.00425595	-0.00494535	-0.00579652	-0.00680003	-0.00794578	-0.00922307	-0.0106207	-0.012127	-0.0137299	-0.015417	-0.0171759	-0.0189938	-0.0208578	-0.0227553	-0.0246735	-0.0265998	-0.0285218	-0.0304274	-0.0323048	-0.0341428	-0.0359304	-0.0376572	-0.0393136	-0.0408902	-0.0423786	-0.0437708	-0.0450596	-0.0462383	-0.0473011	-0.0482427	-0.0490587	-0.0497453	-0.0502994	-0.0507185	-0.051001	-0.0511458	-0.0511523	-0.0508392	-0.0505703	-0.0501649	-0.0496244	-0.0489507	-0.048146	-0.0472126	-0.0461534	-0.0449711
0	sub-4	0	0.519409	0.517165	0.514836	0.512415	0.509892	0.50726	0.504511	0.501637	0.498629	0.49548	0.492182	0.488728	0.48511	0.481322	0.477358	0.473212	0.46888	0.464357	0.45964	0.454726	0.449614	0.444303	0.438792	0.433084	0.427179	0.421081	0.414793	0.408321	0.40167	0.394849	0.387866	0.38073	0.373451	0.366042	0.358515	0.350883	0.343161	0.335364	0.327507	0.319608	0.311683	0.30375	0.295827	0.28793	0.280079	0.27229	0.264581
1	sub-4	1	0.026355	0.0275271	0.02879	0.0301431	0.031585	0.0331138	0.034727	0.0364211	0.0381924	0.0400364	0.0419481	0.0439219	0.045952	0.0480321	0.0501556	0.0523158	0.0545057	0.0567184	0.0589469	0.0611843	0.0634238	0.0656589	0.0678833	0.0700911	0.0722766	0.0744344	0.0765597	0.078648	0.0806952	0.0826978	0.0846528	0.0865576	0.0884101	0.0902089	0.0919526	0.0936405	0.0952721	0.0968473	0.0983661	0.0998286	0.101235	0.102586	0.103882	0.105123	0.106309	0.107441	0.108518
0	sub-5	0	0.0626507	0.0603243	0.0579089	0.0554231	0.0528854	0.0504175	0.0478299	0.0452442	0.0426777	0.0401468	0.0376672	0.0352539	0.0329211	0.0306817	0.0285476	0.0265297	0.0246374	0.0228789	0.0212612	0.0197895	0.0184678	0.0172987	0.0162833	0.0154213	0.0147111	0.01415	0.0137337	0.0134571	0.0133138	0.0132967	0.0133976	0.0136079	0.0139183	0.0143189	0.0147997	0.0153504	0.0159604	0.0166194	0.0173168	0.0180422	0.0187855	0.0195367	0.0202863	0.021025	0.0217442	0.0224355	0.0231947
1	sub-5	1	-0.373042	-0.37195	-0.370844	-0.369681	-0.368463	-0.367194	-0.365876	-0.364511	-0.363102	-0.36165	-0.360159	-0.358631	-0.357066	-0.355379	-0.353748	-0.352084	-0.350389	-0.348663	-0.346861	-0.345073	-0.343252	-0.341398	-0.33951	-0.337586	-0.335624	-0.333579	-0.331536	-0.329449	-0.327314	-0.32513	-0.322892	-0.320598	-0.318244	-0.315828	-0.313345	-0.310793	-0.308168	-0.305425	-0.302647	-0.29979	-0.296851	-0.293829	-0.290723	-0.287534	-0.284261	-0.280907	-0.277472
0	sub-7	0	0.288098	0.283677	0.279223	0.274741	0.270234	0.265705	0.261157	0.256595	0.252019	0.247434	0.242841	0.238244	0.233643	0.22904	0.224439	0.219839	0.215245	0.210656	0.206075	0.201505	0.196948	0.192407	0.187884	0.183382	0.178906	0.174458	0.170043	0.165665	0.161328	0.157036	0.152795	0.14861	0.144485	0.140424	0.136434	0.13252	0.128685	0.124935	0.121276	0.11771	0.114244	0.110879	0.107622	0.104473	0.101437	0.098515	0.0957083
1	sub-7	1	-0.073123	-0.0721544	-0.0711821	-0.0702098	-0.0692414	-0.068281	-0.0673328	-0.0664011	-0.0654902	-0.0646042	-0.0637475	-0.0629238	-0.062137	-0.0613904	-0.0606872	-0.0600302	-0.059422	-0.0588648	-0.0583604	-0.0579104	-0.0575161	-0.0571785	-0.0568984	-0.0566764	-0.0565128	-0.056408	-0.0563621	-0.056375	-0.0564467	-0.0565771	-0.0567662	-0.0570137	-0.0573196	-0.0576839	-0.0581065	-0.0585874	-0.0591269	-0.0597251	-0.0603823	-0.0610989	-0.0618754	-0.0627123	-0.0636101	-0.0645695	-0.065591	-0.0666754	-0.0587111
0	sub-9	0	0.134567	0.134942	0.135433	0.136027	0.136711	0.13747	0.138289	0.139152	0.140043	0.140945	0.141843	0.142718	0.143555	0.144337	0.145047	0.14567	0.14619	0.146594	0.146866	0.146995	0.146969	0.146776	0.146407	0.145854	0.145108	0.144165	0.143018	0.141665	0.140104	0.138332	0.136352	0.134163	0.13177	0.129175	0.126385	0.123405	0.120243	0.116907	0.113406	0.10975	0.105949	0.102016	0.0979604	0.0937964	0.0895362	0.085193	0.0807803
1	sub-9	1	0.0973749	0.0946054	0.0919039	0.0892732	0.086716	0.0842347	0.0818315	0.0795084	0.0772673	0.0751098	0.0730375	0.0710515	0.0691532	0.0673434	0.0656231	0.0639928	0.0624529	0.0610038	0.0596452	0.0583771	0.0571988	0.0561096	0.0551082	0.0541934	0.0533634	0.0526162	0.0519495	0.0513608	0.050847	0.0504051	0.0500315	0.0497223	0.0494734	0.0492805	0.0491387	0.0490432	0.0489887	0.0489697	0.0489807	0.049016	0.0490698	0.0491365	0.0492104	0.049286	0.0493578	0.0494208	0.04947
0	sub-10	0	-0.515592	-0.510447	-0.505131	-0.499646	-0.493998	-0.488189	-0.482227	-0.476118	-0.469867	-0.463485	-0.456979	-0.45036	-0.443636	-0.43682	-0.429923	-0.422955	-0.41593	-0.408858	-0.401753	-0.394625	-0.387486	-0.380348	-0.37322	-0.366113	-0.359036	-0.351998	-0.345007	-0.338069	-0.331192	-0.324379	-0.317637	-0.310969	-0.304377	-0.297864	-0.291433	-0.285083	-0.278815	-0.272629	-0.266525	-0.2605	-0.254554	-0.248685	-0.242891	-0.237169	-0.231516	-0.225931	-0.220409
1	sub-10	1	-0.103909	-0.101513	-0.0991994	-0.0969651	-0.0948084	-0.0927269	-0.0907173	-0.0887762	-0.0868997	-0.0850833	-0.0833224	-0.0816117	-0.079946	-0.0783196	-0.0767267	-0.0751614	-0.0736175	-0.0720892	-0.0705703	-0.069055	-0.0675376	-0.0660128	-0.0644753	-0.0629204	-0.0613437	-0.0597411	-0.0581093	-0.056445	-0.0547461	-0.0530104	-0.0512367	-0.0494241	-0.0475725	-0.045682	-0.0437533	-0.0417876	-0.0397864	-0.0377516	-0.0356851	-0.0335893	-0.0314664	-0.0293191	-0.0271497	-0.0249605	-0.0227538	-0.0205318	-0.0182963
0	sub-11	0	0.0642134	0.068299	0.0723275	0.0763005	0.0802197	0.0840868	0.0879034	0.0916711	0.095391	0.0990639	0.10269	0.10627	0.109803	0.113288	0.116723	0.120107	0.123438	0.126711	0.129924	0.133072	0.136152	0.139157	0.142083	0.144923	0.147671	0.150321	0.152866	0.155299	0.157612	0.159798	0.161851	0.163765	0.165532	0.167148	0.168608	0.169907	0.171043	0.172012	0.172813	0.173445	0.173909	0.174206	0.174336	0.174305	0.174114	0.173768	0.173272
1	sub-11	1	0.0824712	0.0829016	0.0833803	0.0839103	0.0844941	0.0851337	0.0858311	0.0865875	0.087404	0.088281	0.0892189	0.0902174	0.0912763	0.0923945	0.0935709	0.0948039	0.0960914	0.0974311	0.0988199	0.100255	0.101732	0.103246	0.104795	0.106371	0.10797	0.109585	0.114235	0.115859	0.117479	0.11909	0.120682	0.122249	0.123783	0.125275	0.126717	0.1281	0.129416	0.130657	0.131816	0.132882	0.133851	0.134713	0.135463	0.136093	0.1366	0.136976	0.137219
0	sub-12	0	-0.0184587	-0.0172335	-0.01607	-0.0149698	-0.0139346	-0.0129661	-0.0120659	-0.0112355	-0.0104761	-0.00978877	-0.00917441	-0.00863351	-0.0081663	-0.00777267	-0.00745217	-0.00720396	-0.00702686	-0.00691932	-0.00687943	-0.00690501	-0.00699359	-0.00714253	-0.00734905	-0.00761028	-0.00792334	-0.00828536	-0.00869353	-0.00914519	-0.00963779	-0.010169	-0.0107368	-0.0113395	-0.0119754	-0.0126436	-0.0133433	-0.014074	-0.014836	-0.0156295	-0.0164554	-0.0173148	-0.0182091	-0.0191403	-0.0201104	-0.0211215	-0.0221761	-0.0232767	-0.0244259
1	sub-12	1	-0.316557	-0.314518	-0.3124	-0.310199	-0.307912	-0.305538	-0.300032	-0.297477	-0.294828	-0.292083	-0.28924	-0.286299	-0.283258	-0.280117	-0.276877	-0.270496	-0.26706	-0.263527	-0.259897	-0.256173	-0.252358	-0.248453	-0.244462	-0.240387	-0.233192	-0.228965	-0.224666	-0.220299	-0.215869	-0.211379	-0.206834	-0.202239	-0.194557	-0.189878	-0.185163	-0.180416	-0.175642	-0.170846	-0.166033	-0.161206	-0.156372	-0.151533	-0.146694	-0.141859	-0.137032	-0.132217	-0.127416
0	sub-13	0	0.298842	0.294952	0.29094	0.286806	0.28255	0.278174	0.273683	0.269078	0.264365	0.259547	0.25463	0.249618	0.244518	0.239335	0.234075	0.228745	0.223349	0.217894	0.212387	0.206832	0.201236	0.195603	0.189941	0.184253	0.178546	0.172824	0.167093	0.161358	0.155624	0.149895	0.144177	0.138476	0.132797	0.127146	0.121529	0.115951	0.112041	0.106561	0.102762	0.097408	0.092129	0.0885533	0.0834452	0.078435	0.0735305	0.0687392	0.0640682
1	sub-13	1	0.290131	0.288183	0.286269	0.284392	0.282556	0.280763	0.279017	0.277319	0.275671	0.274074	0.272528	0.271033	0.26959	0.268198	0.266855	0.265561	0.264314	0.263112	0.261952	0.260832	0.25975	0.258701	0.257684	0.256693	0.255726	0.254778	0.253845	0.252925	0.252012	0.251104	0.250196	0.249285	0.248368	0.247442	0.246502	0.245548	0.244575	0.243581	0.242563	0.241519	0.240446	0.239342	0.238203	0.237027	0.235813	0.234556	0.233255
0	sub-14	0	0.083348	0.0845741	0.0856912	0.086694	0.0875776	0.0883376	0.0889703	0.0894724	0.0898414	0.0900755	0.0901734	0.0901346	0.0899587	0.0896464	0.0891983	0.0886159	0.0879008	0.0870552	0.0860817	0.0849834	0.0837638	0.0824267	0.0809766	0.0794181	0.0777562	0.0759966	0.0741449	0.0722073	0.0701901	0.0681001	0.065944	0.0637288	0.0614617	0.0591501	0.0568013	0.0544227	0.0520218	0.0496061	0.0471829	0.0447594	0.0423424	0.0399388	0.0375545	0.0351954	0.0328666	0.0305724	0.0283166
1	sub-14	1	0.107928	0.104853	0.10158	0.0981157	0.0944681	0.0906465	0.0866607	0.0825213	0.0782397	0.0738281	0.0692988	0.0646651	0.0599404	0.0551385	0.0502735	0.0453597	0.0404117	0.0354441	0.0304717	0.0255091	0.020571	0.0156721	0.0108269	0.00604967	0.00135448	-0.00324488	-0.00773499	-0.0121029	-0.0163361	-0.0204226	-0.0243513	-0.0281116	-0.0316938	-0.0350891	-0.0382896	-0.0412884	-0.0440798	-0.046659	-0.0490226	-0.0511681	-0.0530944	-0.0548015	-0.0562906	-0.0575639	-0.0586249	-0.0594781	-0.0601289
0	sub-15	0	0.123777	0.112873	0.102721	0.0933311	0.0847084	0.0768565	0.0697757	0.0634636	0.0579156	0.0531242	0.0490799	0.0457707	0.0431823	0.0412978	0.0400983	0.039562	0.0396648	0.0403799	0.0416778	0.0435266	0.045892	0.0487369	0.0520219	0.0557052	0.0597429	0.0640894	0.0686978	0.0735199	0.0785068	0.0836094	0.0887779	0.0939623	0.0991131	0.10418	0.109116	0.11387	0.118398	0.122655	0.126598	0.130189	0.133392	0.136178	0.138519	0.140397	0.141794	0.142699	0.143107
1	sub-15	1	-0.299847	-0.294203	-0.288824	-0.283711	-0.278867	-0.274292	-0.269989	-0.265961	-0.26221	-0.25874	-0.255553	-0.252652	-0.250042	-0.247725	-0.245704	-0.24398	-0.242555	-0.241426	-0.240591	-0.240045	-0.23978	-0.239786	-0.240054	-0.24057	-0.241321	-0.24229	-0.243463	-0.244823	-0.246353	-0.248038	-0.24986	-0.251805	-0.253856	-0.255998	-0.258218	-0.260502	-0.262839	-0.26522	-0.267636	-0.270079	-0.272546	-0.275032	-0.277535	-0.280056	-0.282598	-0.285165	-0.287762
0	sub-16	0	-0.382497	-0.384027	-0.385454	-0.386764	-0.387947	-0.388992	-0.389889	-0.390629	-0.391204	-0.391609	-0.391836	-0.391882	-0.391742	-0.391414	-0.390895	-0.390186	-0.389287	-0.388198	-0.386922	-0.385462	-0.383822	-0.382006	-0.380021	-0.377872	-0.375566	-0.37311	-0.370512	-0.367781	-0.364925	-0.361952	-0.358872	-0.355694	-0.352426	-0.349078	-0.345659	-0.342177	-0.338641	-0.33506	-0.331439	-0.327788	-0.324113	-0.320421	-0.316716	-0.313004	-0.309289	-0.305575	-0.301865
1	sub-16	1	-0.596477	-0.590802	-0.585069	-0.579286	-0.573462	-0.567602	-0.561714	-0.555804	-0.549879	-0.543946	-0.538009	-0.532075	-0.526149	-0.520236	-0.51434	-0.508466	-0.502619	-0.4968	-0.491015	-0.485266	-0.479555	-0.473886	-0.46826	-0.462679	-0.457145	-0.451659	-0.446223	-0.440838	-0.435504	-0.430223	-0.424994	-0.419819	-0.414697	-0.409629	-0.404614	-0.399652	-0.394743	-0.389885	-0.385078	-0.380321	-0.375612	-0.370949	-0.36633	-0.361753	-0.357216	-0.352715	-0.348249
0	sub-18	0	-0.438116	-0.431887	-0.425618	-0.419316	-0.412987	-0.40664	-0.400281	-0.393918	-0.38756	-0.381215	-0.37489	-0.368595	-0.362336	-0.356121	-0.349957	-0.343851	-0.33781	-0.331839	-0.325943	-0.320126	-0.314393	-0.308745	-0.303185	-0.297715	-0.292334	-0.287044	-0.281842	-0.276727	-0.271698	-0.26675	-0.261808	-0.257013	-0.252289	-0.24763	-0.243032	-0.23849	-0.234	-0.229557	-0.225156	-0.220794	-0.216468	-0.212173	-0.207907	-0.203667	-0.199451	-0.195256	-0.191007
1	sub-18	1	-0.0481155	-0.0468137	-0.0456145	-0.0445185	-0.0435046	-0.0426155	-0.0418293	-0.0411455	-0.0405417	-0.0400595	-0.0396758	-0.0393889	-0.0391969	-0.0390975	-0.0390882	-0.0391662	-0.0393285	-0.0395719	-0.0398927	-0.0402874	-0.0407304	-0.0412607	-0.0418525	-0.0425015	-0.0432035	-0.043954	-0.0447272	-0.0455614	-0.0464304	-0.0473295	-0.0482538	-0.0491986	-0.0501588	-0.0511295	-0.052106	-0.0530622	-0.054015	-0.0549814	-0.055893	-0.0568311	-0.0577488	-0.0586417	-0.0595058	-0.060337	-0.0611312	-0.0618842	-0.0625921
0	sub-19	0	-0.0170976	-0.0171368	-0.0170101	-0.0167208	-0.016273	-0.0156711	-0.0149201	-0.0140257	-0.0129941	-0.0118319	-0.0105464	-0.00914523	-0.0076366	-0.00602908	-0.00433164	-0.00255356	-0.000704491	0.00120567	0.00316675	0.00516833	0.00719974	0.00925015	0.0113086	0.0133639	0.015405	0.0174208	0.0194003	0.0213329	0.023208	0.0250154	0.0267453	0.0283884	0.0299357	0.0313789	0.0327103	0.0339226	0.0350095	0.0359653	0.037407	0.0380844	0.038618	0.0390055	0.0392448	0.0393353	0.0392766	0.0390696	0.0387157
1	sub-19	1	-0.191352	-0.190852	-0.190406	-0.189765	-0.18942	-0.189121	-0.188862	-0.188642	-0.188455	-0.188298	-0.188165	-0.188053	-0.187956	-0.187869	-0.187541	-0.187458	-0.187123	-0.187021	-0.1869	-0.186753	-0.186573	-0.186353	-0.186087	-0.185766	-0.185385	-0.184934	-0.184408	-0.183552	-0.182853	-0.182055	-0.181154	-0.180142	-0.178767	-0.177516	-0.175892	-0.174382	-0.172737	-0.170953	-0.169027	-0.166958	-0.164745	-0.162388	-0.159888	-0.157245	-0.154464	-0.151547	-0.148497
0	sub-20	0	-0.152825	-0.151475	-0.15004	-0.148523	-0.14693	-0.145265	-0.143532	-0.141736	-0.139883	-0.137978	-0.136025	-0.134031	-0.132001	-0.129941	-0.127857	-0.125756	-0.123645	-0.121531	-0.119422	-0.117327	-0.115253	-0.113211	-0.11121	-0.10926	-0.107372	-0.105554	-0.103818	-0.102175	-0.100633	-0.0992036	-0.0978946	-0.0967148	-0.0954812	-0.0945823	-0.0936419	-0.0930463	-0.0926076	-0.0923279	-0.0922077	-0.0922466	-0.0924423	-0.0927913	-0.0932888	-0.0939286	-0.0947034	-0.0956049	-0.0966239
1	sub-20	1	-0.0835089	-0.0855787	-0.0875956	-0.0895573	-0.0914617	-0.0933073	-0.0950926	-0.0968162	-0.0984056	-0.100003	-0.101536	-0.103002	-0.104403	-0.105736	-0.107	-0.108195	-0.10932	-0.110373	-0.111355	-0.112262	-0.113095	-0.113851	-0.11453	-0.115058	-0.115577	-0.116014	-0.116367	-0.116634	-0.116816	-0.116839	-0.116845	-0.116763	-0.116593	-0.116334	-0.115987	-0.115553	-0.115032	-0.114427	-0.113738	-0.112969	-0.112122	-0.111199	-0.110204	-0.109141	-0.108013	-0.106825	-0.105581
0	sub-21	0	-0.44371	-0.434931	-0.42644	-0.418231	-0.410301	-0.402642	-0.39525	-0.388116	-0.381234	-0.374596	-0.368193	-0.362018	-0.35606	-0.350312	-0.344762	-0.3394	-0.334217	-0.329201	-0.324341	-0.319626	-0.315045	-0.310587	-0.30624	-0.301994	-0.297838	-0.293764	-0.289761	-0.285822	-0.28194	-0.278108	-0.274323	-0.270578	-0.266873	-0.263205	-0.259574	-0.25598	-0.252424	-0.248907	-0.245434	-0.242006	-0.238628	-0.235306	-0.232043	-0.228845	-0.225718	-0.222667	-0.219697
1	sub-21	1	-0.374103	-0.369351	-0.36462	-0.359913	-0.355232	-0.350579	-0.345957	-0.341367	-0.336812	-0.332293	-0.327813	-0.323372	-0.318974	-0.31462	-0.310313	-0.306055	-0.301849	-0.297698	-0.293606	-0.289578	-0.285616	-0.281725	-0.277911	-0.274177	-0.270527	-0.266967	-0.2635	-0.260131	-0.256863	-0.253699	-0.250644	-0.247699	-0.244867	-0.242149	-0.239547	-0.237061	-0.234691	-0.232437	-0.230297	-0.228269	-0.226351	-0.224539	-0.222832	-0.221223	-0.21971	-0.218288	-0.216951
0	sub-23	0	0.289803	0.285582	0.281337	0.277069	0.27278	0.268472	0.264148	0.259809	0.255456	0.251092	0.246717	0.242333	0.237941	0.233543	0.229138	0.224728	0.220313	0.215892	0.211604	0.207171	0.202732	0.198284	0.193827	0.189359	0.184879	0.180385	0.175875	0.171347	0.166801	0.162235	0.157648	0.153177	0.148546	0.143892	0.139217	0.134521	0.129805	0.125072	0.120323	0.115562	0.110792	0.106018	0.101243	0.0964732	0.0917133	0.086969	0.0822464
1	sub-23	1	0.108443	0.107466	0.106463	0.105424	0.104343	0.103213	0.102025	0.100775	0.0994554	0.0980613	0.0965877	0.09503	0.0933845	0.0916479	0.0898177	0.0878917	0.0858688	0.0837483	0.0815302	0.0792152	0.0768048	0.0743009	0.0717953	0.0691131	0.0663478	0.063504	0.060587	0.0576027	0.0545575	0.0514585	0.048313	0.0451289	0.0419144	0.038678	0.0354285	0.0321749	0.0289261	0.0256914	0.0224798	0.0193004	0.0161621	0.0130736	0.0100434	0.00707959	0.0041898	0.00138125	-0.00133937
0	sub-24	0	-0.293795	-0.282579	-0.271187	-0.259646	-0.247986	-0.236233	-0.224413	-0.212552	-0.200674	-0.1888	-0.176952	-0.165093	-0.153355	-0.141698	-0.130138	-0.118688	-0.10736	-0.0961673	-0.0851184	-0.0742222	-0.0634862	-0.0529169	-0.0425196	-0.0322992	-0.0222595	-0.0124039	-0.00273542	0.00674365	0.0160313	0.0251258	0.0340257	0.04273	0.0512374	0.0595468	0.067657	0.0755665	0.0833295	0.0908317	0.0981269	0.105213	0.112086	0.118743	0.125182	0.131455	0.137447	0.14321	0.148743
1	sub-24	1	0.266659	0.262839	0.258907	0.254882	0.250786	0.246639	0.242465	0.238285	0.234123	0.230003	0.225948	0.221981	0.218127	0.214409	0.21085	0.207471	0.204294	0.20134	0.198628	0.196175	0.193999	0.192114	0.190535	0.189273	0.188338	0.187741	0.187488	0.187586	0.188038	0.188845	0.190007	0.191523	0.193386	0.195592	0.198132	0.200996	0.204172	0.207647	0.211455	0.215481	0.219757	0.224262	0.228977	0.233879	0.238946	0.244154	0.249478
0	sub-25	0	-0.146704	-0.145803	-0.144851	-0.143845	-0.142786	-0.141673	-0.140508	-0.139292	-0.138025	-0.13502	-0.133665	-0.132266	-0.130826	-0.129351	-0.127841	-0.126302	-0.124737	-0.123148	-0.121541	-0.119918	-0.118282	-0.116638	-0.114987	-0.113334	-0.111681	-0.110031	-0.108385	-0.106747	-0.105118	-0.103499	-0.101892	-0.100296	-0.0987117	-0.0971381	-0.0955737	-0.0940162	-0.0924629	-0.0909104	-0.0893546	-0.0877909	-0.0862144	-0.0846201	-0.0830026	-0.0813565	-0.0796769	-0.0779587	-0.0745081
1	sub-25	1	-0.291141	-0.289822	-0.288417	-0.286924	-0.28534	-0.283665	-0.281896	-0.280035	-0.278081	-0.276036	-0.273901	-0.27168	-0.269375	-0.266989	-0.264526	-0.261988	-0.259381	-0.256709	-0.253974	-0.251182	-0.248336	-0.245441	-0.242499	-0.239515	-0.236492	-0.233434	-0.230343	-0.227221	-0.224073	-0.2209	-0.217706	-0.214492	-0.211262	-0.208019	-0.204764	-0.2015	-0.198232	-0.194961	-0.19169	-0.188423	-0.185164	-0.181914	-0.178679	-0.175462	-0.172266	-0.169095	-0.165953
0	sub-26	0	0.0669397	0.0659086	0.0648984	0.0639078	0.0629352	0.0619788	0.0610367	0.0601067	0.0591867	0.0582742	0.0573667	0.0564612	0.055555	0.0546449	0.0537276	0.0528	0.0518587	0.0509003	0.0519587	0.0509498	0.0499144	0.0488498	0.0477533	0.0466227	0.045456	0.0442515	0.0430082	0.0417253	0.0404024	0.0390399	0.0376386	0.0361997	0.0347249	0.0332167	0.0316777	0.0301111	0.0285205	0.0269098	0.0252833	0.0236457	0.0220018	0.0203569	0.0187162	0.0170851	0.0154691	0.0138737	0.0123042
1	sub-26	1	0.236268	0.232797	0.230208	0.226777	0.223365	0.21997	0.216588	0.213218	0.210714	0.207354	0.203997	0.200638	0.197274	0.193902	0.190519	0.187121	0.183705	0.180269	0.176809	0.173322	0.169808	0.166264	0.162689	0.159081	0.155441	0.151769	0.148065	0.144331	0.140569	0.136781	0.132971	0.129143	0.125299	0.121446	0.117589	0.11459	0.110738	0.106898	0.103078	0.0992847	0.0955247	0.0918052	0.0881335	0.0845165	0.0809617	0.077476	0.0740665
0	sub-27	0	-0.145094	-0.143584	-0.14201	-0.140372	-0.138669	-0.136902	-0.135073	-0.133181	-0.13123	-0.129221	-0.127155	-0.125036	-0.122865	-0.120645	-0.118377	-0.116063	-0.113706	-0.111307	-0.108868	-0.10639	-0.103874	-0.101321	-0.0987317	-0.0961064	-0.093445	-0.0907468	-0.0880112	-0.0852368	-0.0824221	-0.0795653	-0.0766643	-0.073717	-0.0707209	-0.0676739	-0.0645735	-0.0614178	-0.0582047	-0.0549325	-0.0515996	-0.0482048	-0.0447471	-0.0412258	-0.0376409	-0.0339916	-0.0302789	-0.0265035	-0.022667
1	sub-27	1	-0.00555912	-0.00618562	-0.00679175	-0.00737784	-0.00794425	-0.00849134	-0.00901947	-0.00952896	-0.0100201	-0.0104931	-0.0109481	-0.0113853	-0.0118046	-0.0122062	-0.0125898	-0.0129555	-0.0133033	-0.013633	-0.0139446	-0.0142383	-0.0145141	-0.0147722	-0.0150129	-0.0152364	-0.0154431	-0.0156332	-0.0158071	-0.015965	-0.0161072	-0.0162336	-0.0163445	-0.0164399	-0.0165197	-0.0165842	-0.0166334	-0.0166673	-0.0166863	-0.0166908	-0.0166812	-0.0166583	-0.0166231	-0.0165767	-0.0165205	-0.0164563	-0.016386	-0.0163117	-0.0162359
0	sub-31	0	-0.659924	-0.653716	-0.647657	-0.641738	-0.635952	-0.63029	-0.624744	-0.619305	-0.613965	-0.608713	-0.603543	-0.598444	-0.593407	-0.588425	-0.583487	-0.578585	-0.573709	-0.568849	-0.563997	-0.559142	-0.554273	-0.549382	-0.544456	-0.539485	-0.534459	-0.529366	-0.524195	-0.518936	-0.513577	-0.508108	-0.502519	-0.496802	-0.490946	-0.484944	-0.478788	-0.472473	-0.465992	-0.45934	-0.452513	-0.445508	-0.438323	-0.430957	-0.423408	-0.415678	-0.407767	-0.399678	-0.391413
1	sub-31	1	-0.369846	-0.366984	-0.36404	-0.361012	-0.357896	-0.35469	-0.351392	-0.348001	-0.344514	-0.34093	-0.337249	-0.333471	-0.329594	-0.32562	-0.321549	-0.317382	-0.31312	-0.308766	-0.304323	-0.299794	-0.295183	-0.290495	-0.285735	-0.280909	-0.276023	-0.271084	-0.266099	-0.261076	-0.256021	-0.250943	-0.24585	-0.24075	-0.235651	-0.230563	-0.225492	-0.220447	-0.215437	-0.210468	-0.205549	-0.200687	-0.19589	-0.191163	-0.186514	-0.18195	-0.177476	-0.173099	-0.168824
0	sub-32	0	-0.852799	-0.850437	-0.847831	-0.844981	-0.841888	-0.838554	-0.834981	-0.831172	-0.82713	-0.822857	-0.818356	-0.813631	-0.808683	-0.803515	-0.79813	-0.79253	-0.786718	-0.780695	-0.774465	-0.768027	-0.761385	-0.754539	-0.747491	-0.740242	-0.732792	-0.72514	-0.717287	-0.709231	-0.700971	-0.692505	-0.683832	-0.67495	-0.665856	-0.654571	-0.645058	-0.63533	-0.625387	-0.615229	-0.604858	-0.594276	-0.583488	-0.570518	-0.559339	-0.547973	-0.536431	-0.524723	-0.512862
1	sub-32	1	-0.528362	-0.52819	-0.528119	-0.528148	-0.528273	-0.528493	-0.528802	-0.529196	-0.529668	-0.530213	-0.530823	-0.53149	-0.531374	-0.532131	-0.532918	-0.533722	-0.534533	-0.534507	-0.534464	-0.535225	-0.535938	-0.53659	-0.537164	-0.537645	-0.538017	-0.537431	-0.537537	-0.537484	-0.537257	-0.536838	-0.535381	-0.534539	-0.533462	-0.532138	-0.530554	-0.528699	-0.526563	-0.523305	-0.520583	-0.517557	-0.51422	-0.510569	-0.506602	-0.502317	-0.497715	-0.492799	-0.487574
0	sub-33	0	0.107665	0.107493	0.107674	0.10819	0.109025	0.110158	0.111563	0.113214	0.115081	0.117133	0.119333	0.121646	0.124032	0.126453	0.128866	0.13123	0.133503	0.135641	0.137603	0.139345	0.140825	0.141999	0.142825	0.14326	0.143262	0.14279	0.141803	0.14026	0.138125	0.135362	0.131936	0.127817	0.122977	0.117393	0.111044	0.103914	0.0959931	0.0872741	0.077756	0.0674428	0.0570695	0.0451959	0.0325699	0.0192157	0.00516248	-0.0095561	-0.0249017
1	sub-33	1	0.0600172	0.0610053	0.0622721	0.0637972	0.0655591	0.0675348	0.0697002	0.0720302	0.0744987	0.0770788	0.0797431	0.0824635	0.0852112	0.0879575	0.0906731	0.0933289	0.0958958	0.0983453	0.100649	0.10278	0.104712	0.106418	0.107876	0.109061	0.109952	0.11053	0.110774	0.110668	0.110196	0.109346	0.108104	0.10646	0.104407	0.101936	0.0990432	0.0957249	0.0919791	0.0878052	0.0832042	0.078178	0.0727299	0.0668641	0.0605858	0.0539013	0.0468177	0.039343	0.0314865
[truncated: 1,703 more columns]

## Sheet: panel C
	subject	frequency	0	1	2	3	4	5	6	7	8	9	10	11	12	13	14	15	16	17	18	19	20	21	22	23	24	25	26	27	28	29	30	31	32	33	34	35	36	37	38	39	40	41	42	43	44	45	46
0	sub-1	20	-0.0524633	-0.0543884	-0.056564	-0.0589724	-0.0615949	-0.0644116	-0.0674018	-0.0705437	-0.0738152	-0.0771931	-0.080654	-0.0841739	-0.0877287	-0.091294	-0.0948455	-0.0983591	-0.101811	-0.105178	-0.108437	-0.111566	-0.114544	-0.117351	-0.119969	-0.122378	-0.124563	-0.126508	-0.128198	-0.129621	-0.130766	-0.131621	-0.132179	-0.132432	-0.132374	-0.132003	-0.131315	-0.130309	-0.128988	-0.127353	-0.125408	-0.123161	-0.120619	-0.117791	-0.114689	-0.111324	-0.10771	-0.103863	-0.0997988
1	sub-1	80	-0.0116221	-0.0113412	-0.0112094	-0.0112245	-0.0113839	-0.0116843	-0.0121216	-0.0126912	-0.0133879	-0.0142058	-0.0151383	-0.0161785	-0.0173188	-0.018551	-0.0198665	-0.0212564	-0.0227112	-0.0242212	-0.0257763	-0.0273665	-0.0289812	-0.0306103	-0.0322433	-0.0338699	-0.0354801	-0.0370639	-0.0386116	-0.040114	-0.0415619	-0.0429469	-0.0442607	-0.0454956	-0.0466445	-0.0477008	-0.0485005	-0.0493544	-0.0500993	-0.0507311	-0.0510879	-0.0514828	-0.0517551	-0.0519024	-0.0519232	-0.0518164	-0.0515811	-0.0512171	-0.0507244
0	sub-4	20	0.525044	0.521156	0.517199	0.513165	0.509046	0.504834	0.500522	0.496103	0.491569	0.486916	0.482136	0.477226	0.47218	0.466995	0.461669	0.456199	0.450586	0.444828	0.438928	0.432888	0.426711	0.420402	0.413965	0.407408	0.400738	0.393963	0.387092	0.380136	0.373105	0.366011	0.358867	0.351686	0.344481	0.337267	0.330057	0.322867	0.315711	0.308606	0.301566	0.294607	0.287745	0.280996	0.274373	0.267892	0.261568	0.255412	0.249439
1	sub-4	80	0.0971501	0.0982407	0.0993922	0.100603	0.101871	0.103193	0.104565	0.105984	0.107444	0.10894	0.110465	0.112015	0.113582	0.115158	0.116737	0.11831	0.119871	0.121412	0.122924	0.124401	0.125835	0.127218	0.128546	0.12981	0.131005	0.132126	0.133167	0.134125	0.134995	0.135774	0.136461	0.137052	0.137549	0.137949	0.138253	0.138464	0.138581	0.138606	0.138544	0.138395	0.138164	0.137854	0.137467	0.137009	0.136482	0.135891	0.135239
0	sub-5	20	-0.171356	-0.171386	-0.171389	-0.171346	-0.171243	-0.170908	-0.170641	-0.17027	-0.169786	-0.169175	-0.16843	-0.167542	-0.166503	-0.165309	-0.163955	-0.162438	-0.160758	-0.158914	-0.15691	-0.154748	-0.152432	-0.14997	-0.147369	-0.144638	-0.141785	-0.138823	-0.135763	-0.132616	-0.129397	-0.126117	-0.12279	-0.11943	-0.116049	-0.112661	-0.109277	-0.105909	-0.102569	-0.0992676	-0.0960135	-0.0928163	-0.0896845	-0.0866258	-0.0836473	-0.0807555	-0.0779562	-0.0752544	-0.0724982
1	sub-5	80	-0.26084	-0.260742	-0.26067	-0.260586	-0.260488	-0.260377	-0.26025	-0.260107	-0.259946	-0.259767	-0.259566	-0.259343	-0.259096	-0.258745	-0.258443	-0.258109	-0.257742	-0.257337	-0.256854	-0.256367	-0.255834	-0.255251	-0.254615	-0.253923	-0.253171	-0.252318	-0.251437	-0.250487	-0.249464	-0.248365	-0.247187	-0.245928	-0.244584	-0.243154	-0.241635	-0.240026	-0.238324	-0.236491	-0.234602	-0.232619	-0.230542	-0.228372	-0.226109	-0.223756	-0.221315	-0.218789	-0.21618
0	sub-7	20	0.508066	0.507129	0.506094	0.504955	0.503705	0.502339	0.500847	0.499222	0.497456	0.495541	0.493468	0.491229	0.488816	0.48622	0.483434	0.480451	0.477263	0.473865	0.470251	0.466417	0.462359	0.458074	0.45356	0.448817	0.443846	0.438647	0.433225	0.427583	0.421727	0.415664	0.409402	0.402952	0.396322	0.389526	0.382576	0.375485	0.368269	0.360943	0.353523	0.346025	0.338467	0.330864	0.323236	0.315598	0.307967	0.300361	0.292794
1	sub-7	80	-0.0438508	-0.0450539	-0.0462451	-0.0474237	-0.0485894	-0.0497417	-0.0508805	-0.0520053	-0.053116	-0.0542123	-0.0552942	-0.0563612	-0.0574132	-0.0584497	-0.0594702	-0.0604743	-0.061461	-0.0624296	-0.0633792	-0.0643085	-0.0652165	-0.0661019	-0.0669634	-0.0677998	-0.0686098	-0.0693922	-0.070146	-0.0708702	-0.0715642	-0.0722272	-0.0728591	-0.0734598	-0.0740295	-0.0745688	-0.0750785	-0.0755596	-0.0760136	-0.0764422	-0.0768474	-0.0772314	-0.0775967	-0.0779463	-0.078283	-0.0786104	-0.0789317	-0.0792509	-0.0726208
0	sub-9	20	-0.0268096	-0.0305789	-0.0343813	-0.038212	-0.042066	-0.0459389	-0.0498259	-0.0537229	-0.0576255	-0.0615297	-0.0654315	-0.0693272	-0.0732131	-0.0770857	-0.0809416	-0.0847776	-0.0885906	-0.0923777	-0.0961359	-0.0998624	-0.103554	-0.107209	-0.110824	-0.114395	-0.117921	-0.121398	-0.124823	-0.128192	-0.131503	-0.134752	-0.137934	-0.141048	-0.144088	-0.147051	-0.149933	-0.15273	-0.155437	-0.15805	-0.160565	-0.162975	-0.165276	-0.167462	-0.169527	-0.171465	-0.173268	-0.174931	-0.176447
1	sub-9	80	0.143858	0.142659	0.141573	0.140596	0.139723	0.13895	0.13827	0.137677	0.137165	0.136728	0.136359	0.13605	0.135795	0.135587	0.135419	0.135284	0.135175	0.135085	0.135009	0.134939	0.134869	0.134794	0.134707	0.134604	0.13448	0.134328	0.134145	0.133926	0.133666	0.133362	0.133011	0.132608	0.132151	0.131637	0.131063	0.130426	0.129724	0.128955	0.128117	0.127208	0.126226	0.125171	0.12404	0.122833	0.12155	0.12019	0.118752
0	sub-10	20	-0.369579	-0.365846	-0.361945	-0.357875	-0.353637	-0.34923	-0.344658	-0.339922	-0.335027	-0.329977	-0.32478	-0.319444	-0.313976	-0.308387	-0.302689	-0.296893	-0.291013	-0.285064	-0.279059	-0.273013	-0.266943	-0.260863	-0.25479	-0.248737	-0.242722	-0.236757	-0.230857	-0.225034	-0.219301	-0.213669	-0.208148	-0.202747	-0.197474	-0.192336	-0.187337	-0.182482	-0.177775	-0.173218	-0.16881	-0.164553	-0.160444	-0.156482	-0.152664	-0.148985	-0.145442	-0.142028	-0.138737
1	sub-10	80	-0.157182	-0.154319	-0.151526	-0.148804	-0.146152	-0.143568	-0.14105	-0.138596	-0.136204	-0.13387	-0.131591	-0.129363	-0.12718	-0.12504	-0.122935	-0.120862	-0.118813	-0.116784	-0.114768	-0.112759	-0.110752	-0.10874	-0.106717	-0.104678	-0.102618	-0.100531	-0.0984131	-0.0962602	-0.0940684	-0.0918348	-0.0895568	-0.0872325	-0.0848605	-0.08244	-0.0799707	-0.077453	-0.0748875	-0.0722755	-0.0696186	-0.0669185	-0.0641776	-0.0613981	-0.0585826	-0.0557335	-0.0528536	-0.0499454	-0.0470112
0	sub-11	20	-0.00671444	-0.00264824	0.00157524	0.00594538	0.010451	0.0150804	0.0198215	0.0246617	0.029588	0.0345874	0.0396462	0.044751	0.049888	0.0550437	0.0602046	0.0653573	0.0704888	0.0755862	0.0806368	0.0856286	0.0905495	0.0953879	0.100133	0.104773	0.109297	0.113696	0.117959	0.122078	0.126042	0.129843	0.133473	0.136925	0.140192	0.143268	0.146147	0.148826	0.1513	0.153567	0.155624	0.157471	0.159106	0.16053	0.161745	0.162752	0.163553	0.164153	0.164553
1	sub-11	80	0.0989368	0.0996478	0.100345	0.101035	0.101723	0.102415	0.103115	0.103829	0.104561	0.105315	0.106096	0.106905	0.107747	0.108624	0.109537	0.110487	0.111476	0.112502	0.113567	0.114667	0.115802	0.116968	0.118162	0.119381	0.12062	0.121874	0.125932	0.127193	0.12845	0.129698	0.130929	0.132135	0.133309	0.134443	0.135529	0.136559	0.137524	0.138419	0.139234	0.139962	0.140598	0.141134	0.141564	0.141884	0.142088	0.142172	0.142133
0	sub-12	20	-0.234303	-0.229797	-0.225382	-0.221049	-0.216795	-0.212614	-0.2085	-0.204452	-0.200463	-0.196533	-0.192659	-0.188839	-0.185073	-0.18136	-0.177702	-0.1741	-0.170554	-0.167068	-0.163644	-0.160284	-0.156994	-0.153775	-0.150633	-0.147573	-0.144598	-0.141715	-0.138928	-0.136242	-0.133664	-0.131197	-0.128848	-0.12662	-0.12452	-0.12255	-0.120716	-0.119022	-0.11747	-0.116063	-0.114805	-0.113697	-0.112741	-0.111938	-0.111288	-0.110791	-0.110447	-0.110254	-0.11021
1	sub-12	80	-0.202704	-0.201662	-0.200561	-0.199401	-0.198181	-0.196903	-0.193125	-0.191731	-0.190278	-0.188765	-0.187193	-0.185561	-0.183869	-0.182116	-0.180303	-0.175987	-0.174053	-0.172057	-0.169998	-0.167877	-0.165694	-0.163447	-0.161138	-0.158766	-0.153891	-0.151397	-0.148841	-0.146225	-0.143549	-0.140814	-0.138022	-0.135174	-0.129832	-0.126881	-0.12388	-0.120833	-0.117742	-0.11461	-0.111441	-0.108239	-0.105006	-0.101749	-0.0984696	-0.0951733	-0.0918642	-0.0885465	-0.0852246
0	sub-13	20	0.436372	0.431889	0.427177	0.422237	0.417072	0.411686	0.406087	0.40028	0.394276	0.388085	0.381717	0.375184	0.368501	0.36168	0.354736	0.347683	0.340535	0.333307	0.326013	0.318667	0.311282	0.30387	0.296443	0.289013	0.281589	0.274181	0.266797	0.259446	0.252133	0.244864	0.237646	0.230482	0.223377	0.216335	0.209359	0.202451	0.195615	0.188853	0.184314	0.177703	0.171172	0.164722	0.158355	0.152071	0.145874	0.139764	0.133741
1	sub-13	80	0.25603	0.254073	0.252163	0.250304	0.248499	0.24675	0.245058	0.243426	0.241852	0.240337	0.238881	0.237482	0.236139	0.234849	0.233611	0.232421	0.231276	0.230173	0.229108	0.228077	0.227076	0.226101	0.225147	0.224211	0.223289	0.222375	0.221466	0.220559	0.219649	0.218734	0.21781	0.216876	0.215928	0.214964	0.213984	0.212986	0.212512	0.211473	0.210414	0.209334	0.208232	0.207652	0.206505	0.205337	0.204146	0.202932	0.201696
0	sub-14	20	-0.203419	-0.200403	-0.197548	-0.194855	-0.192326	-0.18996	-0.187756	-0.185712	-0.183825	-0.182091	-0.180508	-0.179068	-0.177768	-0.176602	-0.175563	-0.174644	-0.17384	-0.173143	-0.172544	-0.172037	-0.171614	-0.171265	-0.170982	-0.170757	-0.17058	-0.170442	-0.170334	-0.170245	-0.170168	-0.170091	-0.170006	-0.169904	-0.169776	-0.169614	-0.169409	-0.169152	-0.168838	-0.168458	-0.168007	-0.167478	-0.166866	-0.166166	-0.165373	-0.164485	-0.163498	-0.162412	-0.161224
1	sub-14	80	0.176257	0.173095	0.169755	0.166241	0.16256	0.158719	0.154726	0.150588	0.146314	0.141914	0.137399	0.132778	0.128064	0.123266	0.118397	0.11347	0.108495	0.103486	0.098455	0.0934146	0.0883775	0.0833563	0.0783637	0.0734121	0.0685139	0.0636812	0.058926	0.0542599	0.0496941	0.0452393	0.0409059	0.0367036	0.0326415	0.0287279	0.0249706	0.0213762	0.0179507	0.0146992	0.0116257	0.00873323	0.0060238	0.00349842	0.00115698	-0.0010016	-0.00297948	-0.00477975	-0.00640649
0	sub-15	20	-0.231023	-0.245726	-0.259369	-0.271954	-0.283487	-0.293978	-0.30344	-0.311891	-0.319349	-0.325839	-0.331387	-0.336021	-0.339773	-0.342678	-0.34477	-0.346091	-0.34668	-0.346582	-0.345843	-0.344511	-0.342634	-0.340267	-0.337461	-0.334274	-0.330763	-0.326987	-0.323007	-0.318884	-0.314681	-0.31046	-0.306285	-0.30222	-0.29833	-0.294677	-0.291326	-0.288339	-0.285777	-0.283699	-0.28216	-0.281212	-0.2809	-0.281266	-0.282344	-0.284159	-0.286731	-0.290073	-0.294187
1	sub-15	80	-0.193937	-0.18796	-0.182287	-0.176916	-0.171846	-0.167075	-0.162602	-0.158425	-0.154544	-0.150957	-0.147664	-0.144664	-0.141956	-0.139541	-0.137416	-0.135579	-0.134029	-0.13276	-0.131766	-0.131039	-0.13057	-0.130348	-0.130359	-0.13059	-0.131026	-0.131649	-0.132443	-0.133391	-0.134475	-0.135679	-0.136985	-0.138375	-0.139833	-0.141344	-0.142891	-0.14446	-0.146039	-0.147616	-0.149182	-0.150727	-0.152246	-0.153734	-0.155188	-0.156607	-0.157995	-0.159354	-0.160692
0	sub-16	20	-0.790089	-0.786749	-0.783308	-0.779756	-0.776079	-0.772268	-0.768311	-0.764196	-0.759914	-0.755455	-0.75081	-0.745971	-0.74093	-0.735683	-0.730223	-0.724548	-0.718653	-0.712539	-0.706204	-0.699651	-0.692882	-0.6859	-0.678713	-0.671325	-0.663746	-0.655984	-0.648051	-0.639956	-0.631713	-0.623335	-0.614836	-0.606229	-0.597531	-0.588755	-0.579918	-0.571034	-0.562119	-0.553187	-0.544254	-0.535332	-0.526435	-0.517576	-0.508766	-0.500017	-0.491338	-0.48274	-0.474229
1	sub-16	80	-0.469714	-0.46608	-0.462382	-0.458626	-0.454817	-0.45096	-0.447061	-0.443126	-0.439159	-0.435167	-0.431154	-0.427125	-0.423087	-0.419044	-0.415	-0.41096	-0.406929	-0.40291	-0.398908	-0.394926	-0.390966	-0.387033	-0.383128	-0.379253	-0.375411	-0.371604	-0.367831	-0.364096	-0.360398	-0.356737	-0.353115	-0.349532	-0.345986	-0.342478	-0.339007	-0.335571	-0.332171	-0.328804	-0.325468	-0.322162	-0.318883	-0.31563	-0.312399	-0.309187	-0.305991	-0.302809	-0.299636
0	sub-18	20	-0.555314	-0.547717	-0.539968	-0.532084	-0.52408	-0.515976	-0.507791	-0.499545	-0.491259	-0.482957	-0.474659	-0.46639	-0.458172	-0.450028	-0.441979	-0.434047	-0.426253	-0.418617	-0.411156	-0.403889	-0.39683	-0.389993	-0.383389	-0.377029	-0.370921	-0.365071	-0.359482	-0.354157	-0.349096	-0.344297	-0.339673	-0.335383	-0.331338	-0.327528	-0.323942	-0.32057	-0.317397	-0.314411	-0.311598	-0.308942	-0.306428	-0.30404	-0.301764	-0.299582	-0.297479	-0.29544	-0.293367
1	sub-18	80	-0.0308958	-0.0297834	-0.0287971	-0.0279354	-0.0271757	-0.0265568	-0.0260548	-0.0256663	-0.0253664	-0.0251922	-0.0251179	-0.0251386	-0.0252486	-0.0254424	-0.0257138	-0.0260568	-0.026465	-0.0269318	-0.0274507	-0.0280149	-0.0285972	-0.0292325	-0.0298934	-0.0305738	-0.0312676	-0.0319689	-0.0326515	-0.0333515	-0.0340429	-0.0347208	-0.0353806	-0.0360178	-0.0366284	-0.0372086	-0.0377551	-0.0382443	-0.0386944	-0.0391241	-0.0394694	-0.0398117	-0.0401084	-0.0403584	-0.0405608	-0.0407147	-0.0408196	-0.0408746	-0.0408793
0	sub-19	20	0.089768	0.0904175	0.0911903	0.0920837	0.0930936	0.0942157	0.0954443	0.0967734	0.0981959	0.099704	0.101289	0.102943	0.104656	0.106417	0.108217	0.110045	0.111891	0.113743	0.115592	0.117425	0.119234	0.121005	0.12273	0.124398	0.125997	0.127519	0.128954	0.130292	0.131526	0.132645	0.133644	0.134515	0.135253	0.135852	0.136307	0.136616	0.136775	0.136784	0.136643	0.136351	0.135912	0.135327	0.134601	0.133739	0.132746	0.13163	0.130398
1	sub-19	80	-0.200253	-0.199982	-0.199732	-0.199279	-0.199065	-0.198865	-0.198676	-0.198495	-0.19832	-0.198146	-0.19797	-0.197788	-0.197597	-0.197392	-0.196948	-0.196703	-0.19621	-0.195907	-0.195568	-0.195187	-0.19476	-0.194281	-0.193746	-0.193149	-0.192485	-0.191748	-0.190935	-0.189818	-0.188836	-0.187761	-0.186591	-0.185319	-0.183722	-0.182239	-0.180425	-0.178719	-0.176898	-0.174961	-0.172687	-0.170518	-0.168233	-0.165835	-0.163325	-0.160706	-0.157983	-0.155159	-0.15224
0	sub-20	20	-0.190439	-0.189491	-0.188491	-0.187442	-0.186347	-0.18521	-0.184036	-0.182828	-0.18159	-0.180328	-0.179046	-0.17775	-0.176445	-0.175137	-0.173833	-0.17254	-0.171264	-0.170013	-0.168795	-0.167618	-0.16649	-0.16542	-0.164417	-0.163488	-0.162644	-0.161892	-0.161241	-0.160698	-0.160271	-0.159966	-0.15979	-0.159747	-0.159842	-0.160078	-0.160456	-0.160977	-0.16164	-0.162443	-0.163383	-0.164454	-0.165651	-0.166965	-0.168389	-0.169911	-0.171521	-0.173208	-0.174959
1	sub-20	80	-0.0801282	-0.0817933	-0.0833942	-0.0849295	-0.0863978	-0.0877984	-0.0891306	-0.0903937	-0.0915222	-0.0926463	-0.0937003	-0.0946838	-0.0955965	-0.0964381	-0.0972084	-0.097907	-0.0985336	-0.099088	-0.0995698	-0.0999789	-0.100315	-0.100577	-0.100766	-0.100816	-0.100857	-0.100824	-0.100718	-0.100537	-0.100284	-0.099893	-0.0994962	-0.0990292	-0.0984283	-0.0978255	-0.0970922	-0.096361	-0.0955687	-0.094718	-0.0938116	-0.0928526	-0.0918441	-0.0907896	-0.0896926	-0.0885567	-0.0873859	-0.0861841	-0.0849552
0	sub-21	20	-0.050363	-0.0496993	-0.0489391	-0.0480805	-0.0471223	-0.0460648	-0.0449095	-0.043659	-0.0423172	-0.0408888	-0.0393797	-0.0377964	-0.0361464	-0.0344372	-0.0326773	-0.030875	-0.029039	-0.0271779	-0.0253002	-0.0234144	-0.0215286	-0.0196505	-0.0177877	-0.0159474	-0.0141366	-0.012362	-0.0106303	-0.00894808	-0.00732177	-0.00575791	-0.00426309	-0.00284401	-0.00150747	-0.000260341	0.000890473	0.00193808	0.00287567	0.00369659	0.0043944	0.00496296	0.00539651	0.00568971	0.00583775	0.00583642	0.00568211	0.00537196	0.00490377
1	sub-21	80	-0.479625	-0.472452	-0.465421	-0.458534	-0.451792	-0.445195	-0.438743	-0.432433	-0.426265	-0.420235	-0.414343	-0.408583	-0.402954	-0.397453	-0.392074	-0.386817	-0.381677	-0.376651	-0.371736	-0.366931	-0.362233	-0.35764	-0.35315	-0.348762	-0.344475	-0.340288	-0.336199	-0.332208	-0.328315	-0.324518	-0.320817	-0.317212	-0.313702	-0.310285	-0.306962	-0.303731	-0.30059	-0.297539	-0.294575	-0.291695	-0.288899	-0.286183	-0.283545	-0.280982	-0.278491	-0.276069	-0.273713
0	sub-23	20	0.254301	0.252589	0.250779	0.248869	0.24686	0.244753	0.242548	0.240247	0.237848	0.235354	0.232766	0.230083	0.227307	0.22444	0.22148	0.218431	0.21529	0.21206	0.20874	0.205329	0.201826	0.198233	0.194546	0.190765	0.18689	0.182918	0.178849	0.174683	0.170419	0.166057	0.161597	0.157041	0.152389	0.147644	0.142807	0.137882	0.132873	0.127784	0.12262	0.117386	0.112088	0.106735	0.101332	0.095887	0.0904093	0.0849072	0.0793898
1	sub-23	80	0.162446	0.160076	0.157697	0.155304	0.152891	0.150455	0.14799	0.145494	0.142961	0.140389	0.137774	0.135113	0.132404	0.129645	0.126834	0.123969	0.12105	0.118076	0.115113	0.112029	0.108891	0.105701	0.102526	0.0992347	0.0958975	0.0925168	0.0890959	0.0856387	0.0821493	0.0786324	0.0750929	0.0716026	0.068034	0.0644598	0.0608861	0.0573193	0.0537659	0.0502328	0.0467268	0.0432548	0.0398237	0.0364405	0.0331118	0.0298445	0.0266448	0.0235188	0.0204724
0	sub-24	20	-0.680233	-0.679646	-0.678561	-0.676979	-0.674903	-0.672336	-0.669282	-0.665743	-0.661725	-0.65723	-0.652264	-0.646829	-0.640932	-0.634575	-0.627764	-0.620501	-0.612792	-0.604638	-0.596042	-0.587006	-0.577531	-0.567618	-0.557267	-0.546479	-0.535254	-0.523592	-0.511496	-0.498965	-0.486001	-0.472608	-0.458787	-0.444542	-0.429877	-0.414796	-0.399306	-0.383414	-0.367128	-0.350458	-0.333286	-0.315885	-0.298139	-0.280065	-0.261679	-0.242873	-0.223927	-0.204733	-0.185318
1	sub-24	80	0.176491	0.180405	0.184223	0.187941	0.191557	0.195069	0.198479	0.201787	0.204996	0.208108	0.21113	0.214098	0.216953	0.219734	0.222449	0.225105	0.227709	0.23027	0.232795	0.235291	0.237765	0.240224	0.242674	0.24512	0.247567	0.250019	0.252479	0.254951	0.257436	0.259935	0.262447	0.264971	0.267504	0.270043	0.272583	0.275119	0.277676	0.280181	0.282658	0.285099	0.287494	0.289831	0.2921	0.294289	0.296386	0.29838	0.30026
0	sub-25	20	-0.636912	-0.630726	-0.624511	-0.618283	-0.612055	-0.605841	-0.599655	-0.593511	-0.587421	-0.581399	-0.575455	-0.5696	-0.563845	-0.558197	-0.552666	-0.547258	-0.541978	-0.536831	-0.53182	-0.526949	-0.522217	-0.517625	-0.513172	-0.508856	-0.504673	-0.50062	-0.496692	-0.492883	-0.489187	-0.485597	-0.482106	-0.478703	-0.47538	-0.472127	-0.468931	-0.465782	-0.462667	-0.459572	-0.456483	-0.453388	-0.450272	-0.447121	-0.443923	-0.440664	-0.437334	-0.433922	-0.430418
1	sub-25	80	-0.126939	-0.127069	-0.127116	-0.127074	-0.12694	-0.126707	-0.126372	-0.125933	-0.125386	-0.123829	-0.12307	-0.122202	-0.121228	-0.120149	-0.118967	-0.117686	-0.116308	-0.114837	-0.113278	-0.111634	-0.10991	-0.10811	-0.106239	-0.104301	-0.102303	-0.100247	-0.0981392	-0.0959838	-0.0937854	-0.0915484	-0.0892771	-0.086976	-0.0846491	-0.0823006	-0.0799343	-0.0775543	-0.0751641	-0.0727674	-0.0703677	-0.0679682	-0.0655723	-0.063183	-0.0608035	-0.0584365	-0.0560849	-0.0537513	-0.0505351
0	sub-26	20	0.265348	0.2614	0.2575	0.253648	0.249844	0.246087	0.242377	0.238711	0.235086	0.231497	0.22794	0.224409	0.220898	0.217398	0.213904	0.210405	0.206894	0.203361	0.202801	0.199187	0.195522	0.191799	0.188007	0.18414	0.180189	0.176146	0.172007	0.167765	0.163417	0.158959	0.15439	0.149709	0.144918	0.140017	0.13501	0.129901	0.124696	0.119401	0.114024	0.108572	0.103055	0.0974827	0.0918651	0.0862129	0.0805373	0.0748493	0.0691605
1	sub-26	80	0.16612	0.163674	0.162	0.159582	0.157173	0.154774	0.15238	0.149989	0.148356	0.145962	0.143563	0.141158	0.138743	0.136317	0.133877	0.131421	0.128947	0.126455	0.123942	0.121407	0.11885	0.116271	0.11367	0.111047	0.108403	0.10574	0.103058	0.100362	0.0976525	0.0949334	0.0922081	0.0894805	0.0867547	0.0840353	0.0813271	0.0793909	0.0767177	0.0740713	0.0714572	0.0688809	0.0663482	0.0638647	0.0614361	0.059068	0.0567662	0.054536	0.0523826
0	sub-27	20	-0.279375	-0.276831	-0.274036	-0.270995	-0.267712	-0.264195	-0.260453	-0.256494	-0.25233	-0.247972	-0.243433	-0.238727	-0.233868	-0.228868	-0.223744	-0.218508	-0.213175	-0.20776	-0.202274	-0.196733	-0.191146	-0.185527	-0.179885	-0.174229	-0.168569	-0.16291	-0.157259	-0.151619	-0.145994	-0.140386	-0.134796	-0.129222	-0.123664	-0.118118	-0.112583	-0.107055	-0.101528	-0.096	-0.0904646	-0.084917	-0.0793521	-0.0737646	-0.0681493	-0.062501	-0.056815	-0.0510869	-0.0453128
1	sub-27	80	0.0174248	0.0167036	0.0159591	0.0151922	0.014404	0.0135957	0.0127688	0.0119249	0.0110661	0.0101944	0.00931225	0.00842213	0.00752677	0.00662904	0.00573189	0.0048383	0.0039513	0.00307382	0.00220876	0.00135884	0.000526641	-0.000285425	-0.00107516	-0.00184055	-0.0025798	-0.00329128	-0.00397357	-0.00462538	-0.00524562	-0.00583335	-0.00638782	-0.00690846	-0.00739491	-0.00784703	-0.00826504	-0.00864905	-0.00899983	-0.00931828	-0.00960562	-0.00986337	-0.0100934	-0.0102978	-0.0104794	-0.0106406	-0.0107847	-0.0109152	-0.0110358
0	sub-31	20	-0.569369	-0.564768	-0.560342	-0.556063	-0.551905	-0.547841	-0.543844	-0.539885	-0.535937	-0.531974	-0.527968	-0.523896	-0.519732	-0.515453	-0.511037	-0.506464	-0.501715	-0.49677	-0.491616	-0.486235	-0.480616	-0.474747	-0.468617	-0.462217	-0.455542	-0.448584	-0.441341	-0.433809	-0.425988	-0.417879	-0.409484	-0.400807	-0.391854	-0.382632	-0.37315	-0.363418	-0.353447	-0.343249	-0.332838	-0.322229	-0.311436	-0.300477	-0.289368	-0.278127	-0.266772	-0.255322	-0.243793
1	sub-31	80	-0.419424	-0.415851	-0.412213	-0.40851	-0.404743	-0.400914	-0.397024	-0.393076	-0.389072	-0.385016	-0.380909	-0.376754	-0.372554	-0.368312	-0.364031	-0.359713	-0.355363	-0.350982	-0.346574	-0.342143	-0.337692	-0.333225	-0.328744	-0.324255	-0.319761	-0.315265	-0.310771	-0.306282	-0.301803	-0.297335	-0.292884	-0.288452	-0.284041	-0.279656	-0.275299	-0.270972	-0.266679	-0.262422	-0.258202	-0.254022	-0.249884	-0.245789	-0.24174	-0.237738	-0.233785	-0.229882	-0.226031
0	sub-32	20	-0.611849	-0.605263	-0.59847	-0.591484	-0.584322	-0.577005	-0.569551	-0.561983	-0.554323	-0.546593	-0.538817	-0.531019	-0.523222	-0.515449	-0.507724	-0.500069	-0.492508	-0.48506	-0.477748	-0.47059	-0.463604	-0.456809	-0.450217	-0.443844	-0.437699	-0.431791	-0.426126	-0.420709	-0.415542	-0.410624	-0.405952	-0.401521	-0.397327	-0.390417	-0.386678	-0.383148	-0.379812	-0.376659	-0.373675	-0.370845	-0.368155	-0.362645	-0.360197	-0.357841	-0.355562	-0.353344	-0.351171
1	sub-32	80	-0.627479	-0.628091	-0.628753	-0.629461	-0.630208	-0.630987	-0.63179	-0.632609	-0.633434	-0.634255	-0.63506	-0.635837	-0.635844	-0.636532	-0.637152	-0.637692	-0.638136	-0.637738	-0.637216	-0.637284	-0.637192	-0.636924	-0.636463	-0.635791	-0.634892	-0.633018	-0.631617	-0.62994	-0.627972	-0.625698	-0.622375	-0.619453	-0.616189	-0.612573	-0.608594	-0.604247	-0.599525	-0.593692	-0.58821	-0.582344	-0.576093	-0.569461	-0.562452	-0.555072	-0.54733	-0.539235	-0.530799
0	sub-33	20	0.183915	0.194489	0.205181	0.215966	0.226816	0.237699	0.248583	0.259432	0.270207	0.280869	0.291375	0.301683	0.311748	0.321526	0.330969	0.340034	0.348675	0.356848	0.364508	0.371615	0.378125	0.383998	0.389193	0.393672	0.397397	0.40033	0.402436	0.403681	0.404035	0.403468	0.401954	0.39947	0.395997	0.391519	0.386025	0.379509	0.37197	0.363411	0.353841	0.343277	0.331738	0.319252	0.305851	0.291573	0.276461	0.260564	0.243936
1	sub-33	80	0.0450125	0.0432765	0.041882	0.0408116	0.0400465	0.0395663	0.0393491	0.0393717	0.0396098	0.0400381	0.0406301	0.0413587	0.042196	0.0431135	0.0440821	0.0450725	0.0460554	0.0470015	0.0478817	0.0486674	0.0493307	0.0498442	0.0501816	0.0503174	0.0502274	0.0498885	0.0492788	0.0483782	0.0471678	0.0456305	0.0437508	0.0415148	0.0389104	0.0359275	0.0325575	0.0287937	0.024631	0.0200661	0.0150969	0.00972305	0.00417931	-0.00200147	-0.00858112	-0.0155554	-0.0229191	-0.0306657	-0.0387877
[truncated: 1,703 more columns]
