# Supplementary material for: Pupil dilation offers a time-window on prediction error
Source: eLife. 2026 Jan 8;14:RP105287. doi: 10.7554/eLife.105287 (PMC12782557; doi:10.7554/eLife.105287)
Supplement: Figure 1—source data 1. [file elife-105287-fig1-data1.xlsx]

## Sheet: panel B
subject	frequency	correct
sub-1	20	0.230769
sub-1	80	0.812903
sub-10	20	0.05
sub-10	80	0.948718
sub-11	20	0.075
sub-11	80	0.90566
sub-12	20	0.25
sub-12	80	0.738854
sub-13	20	0.05
sub-13	80	0.905063
sub-14	20	0.025641
sub-14	80	0.91195
sub-15	20	0.15
sub-15	80	0.924051
sub-16	20	0.2
sub-16	80	0.836478
sub-18	20	0.05
sub-18	80	0.955975
sub-19	20	0.282051
sub-19	80	0.825806
sub-20	20	0.1
sub-20	80	0.886076
sub-21	20	0.075
sub-21	80	0.886792
sub-23	20	0.361111
sub-23	80	0.664557
sub-24	20	0.325
sub-24	80	0.582278
sub-25	20	0.425
sub-25	80	0.610063
sub-26	20	0.15
sub-26	80	0.842767
sub-27	20	0.025641
sub-27	80	0.916129
sub-31	20	0.153846
sub-31	80	0.867925
sub-32	20	0.025641
sub-32	80	0.872611
sub-33	20	0.0789474
sub-33	80	0.903226
sub-4	20	0.15
sub-4	80	0.815287
sub-5	20	0.102564
sub-5	80	0.849057
sub-7	20	0.15
sub-7	80	0.724359
sub-9	20	0.358974
sub-9	80	0.738854

## Sheet: panel C
subject	correct	frequency	reaction_time
sub-1	0	20	0.776147
sub-1	0	80	0.786553
sub-1	1	20	0.383347
sub-1	1	80	0.897574
sub-10	0	20	0.382995
sub-10	0	80	0.822747
sub-10	1	20	0.395609
sub-10	1	80	0.557859
sub-11	0	20	0.62733
sub-11	0	80	0.834185
sub-11	1	20	0.359049
sub-11	1	80	0.693171
sub-12	0	20	0.602195
sub-12	0	80	0.909742
sub-12	1	20	1.07407
sub-12	1	80	0.641324
sub-13	0	20	0.555267
sub-13	0	80	0.874895
sub-13	1	20	1.86216
sub-13	1	80	0.582178
sub-14	0	20	1.24759
sub-14	0	80	1.3099
sub-14	1	20	1.08636
sub-14	1	80	1.03252
sub-15	0	20	0.549844
sub-15	0	80	0.788192
sub-15	1	20	1.0343
sub-15	1	80	0.609312
sub-16	0	20	0.593997
sub-16	0	80	0.712944
sub-16	1	20	0.637054
sub-16	1	80	0.575809
sub-18	0	20	0.622643
sub-18	0	80	0.692404
sub-18	1	20	0.586872
sub-18	1	80	0.63264
sub-19	0	20	0.801591
sub-19	0	80	0.941005
sub-19	1	20	0.911318
sub-19	1	80	0.785342
sub-20	0	20	1.00167
sub-20	0	80	1.11249
sub-20	1	20	1.18288
sub-20	1	80	0.93159
sub-21	0	20	0.602628
sub-21	0	80	0.876288
sub-21	1	20	0.993095
sub-21	1	80	0.576934
sub-23	0	20	1.0038
sub-23	0	80	1.48438
sub-23	1	20	1.50414
sub-23	1	80	1.08651
sub-24	0	20	0.820572
sub-24	0	80	0.794907
sub-24	1	20	0.871771
sub-24	1	80	0.709033
sub-25	0	20	1.0771
sub-25	0	80	1.06107
sub-25	1	20	1.24694
sub-25	1	80	1.02732
sub-26	0	20	0.917577
sub-26	0	80	1.13201
sub-26	1	20	1.29571
sub-26	1	80	0.876771
sub-27	0	20	0.832621
sub-27	0	80	1.45026
sub-27	1	20	0.653098
sub-27	1	80	0.698507
sub-31	0	20	1.58587
sub-31	0	80	1.62873
sub-31	1	20	1.97121
sub-31	1	80	1.37629
sub-32	0	20	0.583439
sub-32	0	80	0.909052
sub-32	1	20	1.28667
sub-32	1	80	0.553033
sub-33	0	20	0.610214
sub-33	0	80	0.812836
sub-33	1	20	0.91013
sub-33	1	80	0.727904
sub-4	0	20	0.596042
sub-4	0	80	0.653986
sub-4	1	20	1.05674
sub-4	1	80	0.617267
sub-5	0	20	0.707799
sub-5	0	80	0.840613
sub-5	1	20	0.899749
sub-5	1	80	0.673127
sub-7	0	20	0.596099
sub-7	0	80	0.856688
sub-7	1	20	1.0257
sub-7	1	80	0.698303
sub-9	0	20	0.731313
sub-9	0	80	1.51592
sub-9	1	20	1.01461
sub-9	1	80	0.91623

## Sheet: panel D
	subject	correct	frequency	0	1	2	3	4	5	6	7	8	9	10	11	12	13	14	15	16	17	18	19	20	21	22	23	24	25	26	27	28	29	30	31	32	33	34	35	36	37	38	39	40	41	42	43	44	45
0	sub-1	0	20	-0.101027	-0.101776	-0.102733	-0.103897	-0.105266	-0.106835	-0.108601	-0.110556	-0.112692	-0.115	-0.11747	-0.120087	-0.122839	-0.125711	-0.128686	-0.131747	-0.134876	-0.138053	-0.141259	-0.144473	-0.147675	-0.150843	-0.153956	-0.156993	-0.159931	-0.162749	-0.165426	-0.167942	-0.170274	-0.172404	-0.174313	-0.175982	-0.177394	-0.178533	-0.179385	-0.179937	-0.180176	-0.180095	-0.179683	-0.178937	-0.17785	-0.176422	-0.174653	-0.172543	-0.170098	-0.167322
1	sub-1	0	80	-0.0107656	-0.00866243	-0.00668395	-0.00483715	-0.00312865	-0.00156463	-0.000150803	0.00110771	0.00220649	0.00314199	0.00391161	0.00451387	0.00494843	0.00521624	0.00531951	0.00526177	0.00504779	0.00468359	0.00417634	0.00353422	0.00276637	0.00188274	0.000893947	-0.000188893	-0.00135429	-0.00259051	-0.00388571	-0.00522806	-0.00660577	-0.00800728	-0.00942129	-0.0108369	-0.0122438	-0.0136322	-0.0141483	-0.0154743	-0.0167567	-0.0179885	-0.0191637	-0.0202772	-0.0213245	-0.0223023	-0.0232081	-0.0240403	-0.024798	-0.0254814
2	sub-1	1	20	0.109414	0.10357	0.0973329	0.0907765	0.0839746	0.077001	0.0699289	0.0628301	0.055775	0.0488313	0.0420645	0.0355367	0.0293067	0.0234298	0.0179569	0.012935	0.00840609	0.00440769	0.000972177	-0.00187325	-0.0041067	-0.00571168	-0.00667707	-0.00699711	-0.00667129	-0.00570412	-0.00410499	-0.00188784	0.000928988	0.00432311	0.00826832	0.0127349	0.0176899	0.0230976	0.0289195	0.035115	0.0416414	0.0484544	0.0555083	0.0627564	0.0701514	0.0776456	0.0851912	0.0927407	0.100247	0.107665
3	sub-1	1	80	-0.0118193	-0.0119578	-0.0122509	-0.0126946	-0.0132839	-0.0140134	-0.0148768	-0.0158672	-0.0169771	-0.0181985	-0.0195228	-0.0209411	-0.0224438	-0.0240212	-0.0256633	-0.0273598	-0.0291002	-0.0308739	-0.0326702	-0.0344785	-0.0362882	-0.0380889	-0.0398701	-0.0416219	-0.0433345	-0.0449982	-0.0466041	-0.0481433	-0.0496074	-0.0509885	-0.0522792	-0.0534726	-0.0545621	-0.055542	-0.0564069	-0.0571522	-0.0577734	-0.0582671	-0.0584355	-0.0586651	-0.0587589	-0.0587151	-0.0585323	-0.0582093	-0.0577455	-0.0571404
0	sub-4	0	20	0.514116	0.510416	0.506508	0.502385	0.498035	0.49345	0.488621	0.483539	0.478198	0.472589	0.466709	0.460553	0.454116	0.447397	0.440396	0.433112	0.425548	0.417707	0.409594	0.401216	0.39258	0.383697	0.374579	0.365236	0.355685	0.345939	0.336018	0.325938	0.315719	0.305383	0.294951	0.284446	0.273891	0.26331	0.252728	0.24217	0.231662	0.221229	0.210898	0.200694	0.190644	0.180772	0.171106	0.161668	0.152484	0.143577
1	sub-4	0	80	0.525614	0.525078	0.5246	0.524174	0.523793	0.523451	0.523141	0.522855	0.522584	0.522318	0.522047	0.521761	0.521448	0.521096	0.520693	0.520226	0.519683	0.51905	0.518314	0.517462	0.516481	0.515357	0.514078	0.51263	0.511	0.509177	0.50715	0.504908	0.502441	0.49974	0.4968	0.493614	0.490177	0.486486	0.48254	0.478339	0.473883	0.469176	0.464221	0.459025	0.453592	0.447931	0.442051	0.435961	0.429672	0.423195
2	sub-4	1	20	0.586965	0.582021	0.577781	0.574252	0.571438	0.56934	0.56796	0.567295	0.567343	0.568099	0.569557	0.571707	0.574542	0.578049	0.582216	0.587027	0.592467	0.598517	0.605158	0.612367	0.62012	0.628393	0.637157	0.646383	0.656041	0.666095	0.676513	0.687257	0.698289	0.709569	0.721058	0.732713	0.744493	0.756354	0.768253	0.780146	0.791989	0.803739	0.815352	0.826783	0.837989	0.848927	0.859554	0.869827	0.879705	0.889145
3	sub-4	1	80	7.6376e-05	0.00153524	0.00305606	0.00463795	0.00627938	0.0079782	0.00973167	0.0115364	0.0133885	0.0152835	0.0172164	0.019182	0.0211743	0.0231875	0.0252153	0.0272512	0.0292888	0.0313216	0.0333433	0.0353476	0.0373286	0.0392807	0.0411986	0.0430774	0.0449127	0.0467003	0.0484369	0.0501194	0.0517455	0.0533132	0.0548213	0.056269	0.0576563	0.0589833	0.060251	0.0614605	0.0626135	0.0637117	0.0647574	0.0657526	0.0666999	0.0676016	0.06846	0.0692776	0.0700565	0.0707988
0	sub-5	0	20	-0.0649091	-0.0657618	-0.0666241	-0.0674775	-0.0683046	-0.0689141	-0.0696402	-0.0702928	-0.0708581	-0.0713237	-0.0716784	-0.0719121	-0.0720163	-0.0719839	-0.0718093	-0.0714885	-0.0710188	-0.0703994	-0.0696308	-0.0687151	-0.0676557	-0.0664578	-0.0651273	-0.0636719	-0.0620998	-0.0604205	-0.0586442	-0.0567818	-0.0548445	-0.0528441	-0.0507922	-0.0487007	-0.0465811	-0.0444445	-0.0423018	-0.0401632	-0.0380382	-0.0359358	-0.0338642	-0.0318311	-0.0298434	-0.0279074	-0.0260288	-0.0242127	-0.0224635	-0.0207852
1	sub-5	0	80	0.248675	0.2442	0.23952	0.234653	0.229621	0.224443	0.21914	0.213736	0.208251	0.202708	0.197129	0.191538	0.185955	0.180402	0.174901	0.169473	0.164136	0.15891	0.153812	0.148859	0.144065	0.139444	0.135007	0.130765	0.126727	0.122899	0.119285	0.115889	0.112711	0.109752	0.107008	0.104475	0.102147	0.100016	0.0980728	0.0963076	0.0947084	0.0932624	0.0919557	0.0907741	0.0897026	0.0887261	0.0878292	0.0869968	0.0862138	0.0854656
2	sub-5	1	20	-1.10277	-1.0956	-1.08808	-1.0802	-1.07196	-1.06335	-1.05439	-1.04507	-1.0354	-1.02538	-1.01501	-1.0043	-0.993265	-0.981904	-0.970227	-0.958247	-0.945974	-0.933421	-0.920602	-0.907532	-0.894227	-0.880706	-0.866986	-0.853089	-0.839036	-0.824848	-0.810551	-0.796169	-0.781728	-0.767253	-0.752771	-0.738309	-0.723894	-0.709551	-0.695308	-0.681188	-0.667218	-0.653421	-0.639819	-0.626437	-0.613294	-0.600412	-0.587809	-0.575505	-0.563517	-0.55186
3	sub-5	1	80	-0.351421	-0.350509	-0.349592	-0.348628	-0.347619	-0.346567	-0.345475	-0.344346	-0.343182	-0.341984	-0.340756	-0.3395	-0.338216	-0.336816	-0.335482	-0.334124	-0.332742	-0.331337	-0.329862	-0.328407	-0.326927	-0.325419	-0.323881	-0.322312	-0.320709	-0.319023	-0.317343	-0.31562	-0.31385	-0.31203	-0.310155	-0.308221	-0.306225	-0.304162	-0.302028	-0.299818	-0.29753	-0.295114	-0.292657	-0.290112	-0.287475	-0.284745	-0.281921	-0.279001	-0.275987	-0.272878
0	sub-7	0	20	0.612094	0.609983	0.607674	0.605162	0.602441	0.599505	0.59635	0.592969	0.589357	0.585511	0.581426	0.577098	0.572524	0.567702	0.562631	0.557309	0.551738	0.545918	0.539851	0.533542	0.526994	0.520213	0.513206	0.50598	0.498545	0.490911	0.48309	0.475094	0.466936	0.458631	0.450195	0.441644	0.432995	0.424266	0.415476	0.406643	0.397786	0.388925	0.380079	0.371268	0.362511	0.353826	0.345233	0.336748	0.328389	0.320172
1	sub-7	0	80	0.0319154	0.0256673	0.0195178	0.0134779	0.00755819	0.00176938	-0.00387844	-0.00937562	-0.0147131	-0.0198825	-0.0248762	-0.0296873	-0.0343098	-0.0387385	-0.0429689	-0.046997	-0.05082	-0.0544352	-0.0578408	-0.0610354	-0.0640183	-0.0667892	-0.069348	-0.0716955	-0.0738327	-0.0757612	-0.0774828	-0.0790002	-0.0803161	-0.081434	-0.0823576	-0.0830914	-0.0836401	-0.0840087	-0.084203	-0.0842288	-0.0840923	-0.0838003	-0.0833595	-0.0827772	-0.0820607	-0.0812179	-0.0802567	-0.0791857	-0.0780134	-0.076749
2	sub-7	1	20	-0.0814256	-0.0757111	-0.0695292	-0.0628873	-0.0557971	-0.0482739	-0.0403369	-0.0320089	-0.023316	-0.0142876	-0.00495607	0.00464318	0.0144721	0.02449	0.0346541	0.0449195	0.0552396	0.0655664	0.0758511	0.0860438	0.0960944	0.105953	0.11557	0.124895	0.133882	0.142483	0.150655	0.158355	0.165544	0.172185	0.178245	0.183695	0.188509	0.192663	0.196141	0.198927	0.201009	0.202381	0.203039	0.202983	0.202217	0.200748	0.198586	0.195744	0.192241	0.188094
3	sub-7	1	80	-0.0726822	-0.0719656	-0.0712699	-0.0705986	-0.0699553	-0.0693433	-0.0687662	-0.0682272	-0.0677295	-0.0672759	-0.0668692	-0.0665114	-0.0662047	-0.0659504	-0.0657495	-0.0656028	-0.0655103	-0.0654718	-0.0654867	-0.065554	-0.0656724	-0.0658404	-0.066056	-0.0663173	-0.0666223	-0.0669686	-0.0673541	-0.0677766	-0.0682338	-0.0687238	-0.0692446	-0.0697947	-0.0703724	-0.0709766	-0.0716063	-0.0722607	-0.0729394	-0.0736422	-0.0743693	-0.075121	-0.075898	-0.0767013	-0.077532	-0.0783914	-0.0792812	-0.080203
0	sub-9	0	20	0.0326858	0.0279614	0.0232363	0.018517	0.0138099	0.00912089	0.00445569	-0.000180488	-0.00478279	-0.00934685	-0.0138688	-0.0183453	-0.0227735	-0.0271514	-0.0314774	-0.0357503	-0.0399697	-0.0441353	-0.0482476	-0.0523069	-0.0563141	-0.06027	-0.0641755	-0.0680316	-0.0718391	-0.0755986	-0.0793108	-0.082976	-0.0865944	-0.0901659	-0.0936901	-0.0971666	-0.100594	-0.103972	-0.107299	-0.110571	-0.113788	-0.116945	-0.120039	-0.123066	-0.126021	-0.128899	-0.131693	-0.134398	-0.137007	-0.139513
1	sub-9	0	80	0.19669	0.200173	0.203845	0.207679	0.21165	0.215731	0.219894	0.22411	0.228351	0.232587	0.236789	0.240928	0.244975	0.248903	0.252684	0.256292	0.259703	0.262892	0.265838	0.268521	0.270922	0.273023	0.274811	0.276271	0.277393	0.278167	0.278585	0.278642	0.278334	0.27766	0.276621	0.275218	0.273455	0.271338	0.268875	0.266074	0.262945	0.2595	0.255751	0.251711	0.247395	0.242817	0.237993	0.23294	0.227672	0.222209
2	sub-9	1	20	-0.133051	-0.135115	-0.13727	-0.139514	-0.141844	-0.14426	-0.146757	-0.149334	-0.151987	-0.154713	-0.157508	-0.160366	-0.163284	-0.166254	-0.16927	-0.172326	-0.175414	-0.178525	-0.181651	-0.184783	-0.187912	-0.191029	-0.194124	-0.197188	-0.200211	-0.203183	-0.206094	-0.208936	-0.211697	-0.214369	-0.216942	-0.219407	-0.221754	-0.223976	-0.226065	-0.228012	-0.22981	-0.231452	-0.232931	-0.234241	-0.235374	-0.236325	-0.237087	-0.237654	-0.23802	-0.238178
3	sub-9	1	80	0.125185	0.12233	0.119563	0.116885	0.114301	0.111812	0.10942	0.107127	0.104936	0.102847	0.100862	0.0989813	0.0972059	0.0955362	0.0939723	0.0925141	0.091161	0.0899124	0.0887672	0.087724	0.0867812	0.0859366	0.085188	0.0845325	0.0839672	0.0834885	0.0830928	0.0827759	0.0825334	0.0823606	0.0822524	0.0822033	0.0822078	0.0822598	0.082353	0.0824809	0.0826368	0.0828137	0.0830046	0.0832022	0.0833993	0.0835888	0.0837636	0.0839166	0.0840413	0.084131
0	sub-10	0	20	-0.304819	-0.301129	-0.29724	-0.293155	-0.288875	-0.284402	-0.279742	-0.274898	-0.269877	-0.264687	-0.259336	-0.253834	-0.248191	-0.24242	-0.236534	-0.230546	-0.22447	-0.218322	-0.212118	-0.205872	-0.199601	-0.19332	-0.187045	-0.180791	-0.174572	-0.168403	-0.162297	-0.156265	-0.150319	-0.14447	-0.138727	-0.133097	-0.127589	-0.122209	-0.11696	-0.111848	-0.106876	-0.102045	-0.0973577	-0.0928143	-0.0884146	-0.0841582	-0.0800436	-0.0760692	-0.0722328	-0.0685318
1	sub-10	0	80	-1.51676	-1.50471	-1.49261	-1.48048	-1.46833	-1.45618	-1.44403	-1.43191	-1.41982	-1.40778	-1.39578	-1.38386	-1.372	-1.36022	-1.34852	-1.3369	-1.32536	-1.3139	-1.30252	-1.2912	-1.27994	-1.26873	-1.25755	-1.24639	-1.23524	-1.22408	-1.21288	-1.20164	-1.19034	-1.17895	-1.16746	-1.15586	-1.14412	-1.13223	-1.12018	-1.10795	-1.09553	-1.0829	-1.07007	-1.05701	-1.04372	-1.03019	-1.01642	-1.00239	-0.988113	-0.973575
2	sub-10	1	20	-1.60002	-1.59548	-1.59133	-1.58756	-1.58412	-1.58096	-1.57806	-1.57538	-1.57287	-1.57049	-1.56822	-1.56603	-1.56388	-1.56175	-1.55963	-1.55749	-1.55534	-1.55315	-1.55094	-1.5487	-1.54644	-1.54418	-1.54193	-1.53972	-1.53756	-1.53548	-1.5335	-1.53165	-1.52996	-1.52846	-1.52716	-1.5261	-1.52529	-1.52475	-1.5245	-1.52453	-1.52487	-1.52549	-1.5264	-1.52758	-1.529	-1.53064	-1.53245	-1.53439	-1.53641	-1.53845
3	sub-10	1	80	-0.0836912	-0.0813248	-0.0790354	-0.0768219	-0.0746826	-0.0726155	-0.070618	-0.068687	-0.0668191	-0.0650102	-0.0632561	-0.061552	-0.0598928	-0.0582732	-0.0566875	-0.0551298	-0.0535943	-0.0520748	-0.0505653	-0.0490598	-0.0475525	-0.0460376	-0.0445097	-0.0429637	-0.0413949	-0.0397988	-0.0381716	-0.0365098	-0.0348107	-0.0330719	-0.0312917	-0.0294691	-0.0276033	-0.0256946	-0.0237433	-0.0217505	-0.0197178	-0.0176469	-0.0155402	-0.0134002	-0.0112295	-0.00903102	-0.0068078	-0.00456281	-0.00229905	-1.94301e-05
0	sub-11	0	20	0.0363394	0.0405084	0.044774	0.0491295	0.0535678	0.0580814	0.0626623	0.0673017	0.0719905	0.0767194	0.0814781	0.0862565	0.0910439	0.0958295	0.100603	0.105352	0.110068	0.114738	0.119353	0.123901	0.128373	0.132759	0.137049	0.141233	0.145303	0.149248	0.153061	0.156733	0.160257	0.163625	0.16683	0.169866	0.172728	0.17541	0.177909	0.180221	0.182344	0.184275	0.186013	0.187559	0.188912	0.190075	0.191048	0.191835	0.192439	0.192863
1	sub-11	0	80	0.132969	0.136849	0.140293	0.143322	0.145961	0.148233	0.150165	0.151782	0.153112	0.15418	0.155014	0.155637	0.156075	0.156352	0.156488	0.156503	0.156417	0.156244	0.156	0.155694	0.155338	0.154938	0.154499	0.154024	0.153515	0.152969	0.152386	0.15176	0.151086	0.150359	0.149571	0.148715	0.147783	0.146768	0.145665	0.144466	0.143166	0.141763	0.140252	0.138631	0.136901	0.135062	0.133114	0.131063	0.128911	0.126666
2	sub-11	1	20	-0.537712	-0.534914	-0.531209	-0.526658	-0.521323	-0.515266	-0.508548	-0.501232	-0.493376	-0.48504	-0.47628	-0.46715	-0.4577	-0.447981	-0.438038	-0.427914	-0.41765	-0.407286	-0.396858	-0.3864	-0.375946	-0.365526	-0.35517	-0.344909	-0.334768	-0.324776	-0.314959	-0.305342	-0.295949	-0.286805	-0.277932	-0.269353	-0.261089	-0.25316	-0.245586	-0.238383	-0.23157	-0.225162	-0.219173	-0.213617	-0.208506	-0.203851	-0.199661	-0.195943	-0.192703	-0.189944
3	sub-11	1	80	0.0953917	0.0957727	0.0961842	0.0966305	0.0971152	0.0976421	0.098214	0.0988338	0.0995035	0.100225	0.101	0.101829	0.102713	0.103652	0.104646	0.105694	0.106794	0.107946	0.109147	0.110393	0.111683	0.113013	0.114377	0.115772	0.117193	0.118634	0.123177	0.124634	0.126092	0.127546	0.128987	0.130408	0.131801	0.133159	0.134473	0.135735	0.136937	0.13807	0.139128	0.140101	0.140983	0.141766	0.142444	0.143011	0.14346	0.143787
0	sub-12	0	20	-0.215938	-0.212185	-0.208518	-0.204922	-0.201383	-0.197889	-0.194426	-0.190982	-0.187548	-0.184113	-0.180668	-0.177208	-0.173725	-0.170216	-0.166676	-0.163103	-0.159497	-0.155856	-0.152182	-0.148476	-0.144741	-0.140982	-0.137202	-0.133408	-0.129605	-0.1258	-0.122002	-0.118216	-0.114453	-0.110719	-0.107024	-0.103377	-0.099785	-0.0962577	-0.0928031	-0.0894293	-0.086144	-0.0829547	-0.0798684	-0.0768918	-0.0740311	-0.0712919	-0.0686796	-0.0661988	-0.0638537	-0.0616479
1	sub-12	0	80	0.126039	0.125414	0.124745	0.12402	0.123223	0.122343	0.121368	0.120287	0.119089	0.117765	0.116309	0.114714	0.112974	0.111088	0.109053	0.106869	0.104536	0.102059	0.0994392	0.0966834	0.0937974	0.0907888	0.0876656	0.0844368	0.0811121	0.0777013	0.0742148	0.0706629	0.067056	0.0634042	0.0597174	0.0560049	0.0522755	0.0485375	0.0447981	0.0410639	0.0373406	0.0336329	0.0299444	0.0262782	0.0226362	0.0190194	0.0154281	0.0118619	0.00831969	0.00479976
2	sub-12	1	20	-0.289397	-0.282635	-0.275973	-0.269431	-0.26303	-0.256788	-0.250725	-0.244859	-0.23921	-0.233794	-0.228629	-0.223731	-0.219114	-0.214793	-0.21078	-0.207088	-0.203726	-0.200704	-0.19803	-0.19571	-0.19375	-0.192155	-0.190927	-0.190067	-0.189578	-0.189458	-0.189707	-0.190321	-0.191297	-0.192631	-0.194317	-0.19635	-0.198723	-0.201428	-0.204456	-0.207798	-0.211446	-0.215389	-0.219615	-0.224113	-0.228871	-0.233876	-0.239114	-0.244569	-0.250228	-0.256072
3	sub-12	1	80	-0.318898	-0.317266	-0.31554	-0.313713	-0.311781	-0.30974	-0.304282	-0.302013	-0.299623	-0.297108	-0.294465	-0.291693	-0.288788	-0.285749	-0.282575	-0.275962	-0.27252	-0.268942	-0.26523	-0.261386	-0.25741	-0.253306	-0.249077	-0.244725	-0.236952	-0.232371	-0.22768	-0.222884	-0.217987	-0.212995	-0.207913	-0.202747	-0.194198	-0.188882	-0.1835	-0.178055	-0.172556	-0.167006	-0.161414	-0.155783	-0.150122	-0.144434	-0.138727	-0.133005	-0.127274	-0.12154
0	sub-13	0	20	0.423816	0.419387	0.414775	0.40998	0.405001	0.39984	0.394499	0.388982	0.383294	0.37744	0.371429	0.365268	0.358965	0.35253	0.345973	0.339304	0.332533	0.325671	0.318727	0.311713	0.304637	0.29751	0.290341	0.283138	0.27591	0.268664	0.261409	0.25415	0.246895	0.23965	0.23242	0.225212	0.218032	0.210885	0.203777	0.196714	0.189702	0.182746	0.178113	0.171285	0.164532	0.15786	0.151275	0.144784	0.138392	0.132106
1	sub-13	0	80	-0.0177604	-0.0202808	-0.0227747	-0.0252366	-0.0276616	-0.0300456	-0.0323851	-0.0346776	-0.0369216	-0.0391165	-0.0412626	-0.0433613	-0.045415	-0.0474266	-0.0494002	-0.0513402	-0.0532515	-0.0551394	-0.0570092	-0.0588659	-0.0607146	-0.0625597	-0.064405	-0.0662536	-0.068108	-0.0699694	-0.0718386	-0.073715	-0.0755974	-0.0774837	-0.0793708	-0.0812548	-0.0831308	-0.084993	-0.0868349	-0.0886491	-0.0847007	-0.0864408	-0.0881263	-0.0897469	-0.0912918	-0.0870236	-0.0883906	-0.0896483	-0.0907854	-0.0917909
2	sub-13	1	20	0.674925	0.669428	0.662804	0.655109	0.646406	0.636762	0.626251	0.614952	0.602948	0.590326	0.577179	0.563599	0.549682	0.535525	0.521225	0.506875	0.49257	0.4784	0.464449	0.450801	0.437529	0.424704	0.412389	0.400637	0.389495	0.379001	0.369183	0.360062	0.351647	0.343939	0.33693	0.330603	0.32493	0.319878	0.315403	0.311454	0.307973	0.304895	0.302147	0.299654	0.297333	0.295099	0.292863	0.290537	0.28803	0.285251
3	sub-13	1	80	0.284749	0.282851	0.281003	0.279207	0.277467	0.275784	0.274161	0.272597	0.271094	0.269651	0.268267	0.266941	0.265673	0.264459	0.263297	0.262186	0.261121	0.2601	0.25912	0.258175	0.257263	0.25638	0.25552	0.25468	0.253855	0.25304	0.252232	0.251427	0.250619	0.249806	0.248983	0.248148	0.247297	0.246429	0.245539	0.244626	0.243688	0.242723	0.24173	0.240706	0.23965	0.238562	0.237438	0.236279	0.235082	0.233847
0	sub-14	0	20	-0.211923	-0.208802	-0.205846	-0.203057	-0.200437	-0.197983	-0.195696	-0.193573	-0.191611	-0.189807	-0.188156	-0.186654	-0.185294	-0.184072	-0.18298	-0.182013	-0.181162	-0.180421	-0.179782	-0.179236	-0.178776	-0.178393	-0.178078	-0.177822	-0.177615	-0.177448	-0.177312	-0.177196	-0.177091	-0.176987	-0.176875	-0.176745	-0.176589	-0.176397	-0.176161	-0.175873	-0.175525	-0.17511	-0.174622	-0.174054	-0.1734	-0.172657	-0.171818	-0.170881	-0.169844	-0.168704
1	sub-14	0	80	0.884797	0.88088	0.877007	0.873162	0.86933	0.865494	0.861635	0.857737	0.853783	0.849756	0.845639	0.841417	0.837074	0.832596	0.827969	0.823179	0.818214	0.813062	0.807711	0.802151	0.796373	0.790367	0.784125	0.77764	0.770907	0.763918	0.75667	0.749159	0.741381	0.733337	0.725024	0.716444	0.707599	0.698492	0.689127	0.67951	0.669649	0.659551	0.649225	0.638681	0.62793	0.616983	0.605852	0.594547	0.583081	0.571464
2	sub-14	1	20	0.119701	0.118744	0.117787	0.11683	0.115874	0.114917	0.11396	0.113003	0.112047	0.11109	0.110133	0.109176	0.10822	0.107263	0.106306	0.10535	0.104393	0.103436	0.10248	0.101523	0.100567	0.0996103	0.0986539	0.0976976	0.0967412	0.095785	0.0948288	0.0938726	0.0929165	0.0919605	0.0910046	0.0900487	0.0890929	0.0881372	0.0871816	0.0862261	0.0852707	0.0843153	0.0833601	0.082405	0.08145	0.0804951	0.0795403	0.0785857	0.0776311	0.0766767
3	sub-14	1	80	0.107847	0.104757	0.101468	0.0979866	0.0943205	0.0904791	0.0864724	0.0823111	0.0780066	0.0735711	0.0690172	0.0643582	0.0596075	0.054779	0.0498871	0.044946	0.0399705	0.0349752	0.0299751	0.0249848	0.0200193	0.0150932	0.0102212	0.00541761	0.000696639	-0.00392785	-0.00844233	-0.0128338	-0.0170895	-0.0211977	-0.0251469	-0.0289265	-0.0325268	-0.0359389	-0.0391549	-0.0421678	-0.0449719	-0.0475623	-0.0499356	-0.0520893	-0.0540223	-0.0557346	-0.0572273	-0.0585028	-0.0595646	-0.0604171
0	sub-15	0	20	0.0307907	0.0180837	0.00641734	-0.00422235	-0.0138541	-0.0225009	-0.0301899	-0.0369514	-0.0428187	-0.0478278	-0.052017	-0.0554267	-0.0580994	-0.0600792	-0.061412	-0.062145	-0.0623268	-0.0620074	-0.0612377	-0.0600696	-0.058556	-0.0567506	-0.0547083	-0.052485	-0.0501372	-0.0477223	-0.0452978	-0.0429211	-0.0406498	-0.0385412	-0.0366524	-0.0350402	-0.0337607	-0.0328696	-0.0324216	-0.0324697	-0.033065	-0.0342555	-0.036086	-0.0385963	-0.0418207	-0.0457872	-0.0505165	-0.0560214	-0.062307	-0.0693701
1	sub-15	0	80	0.387239	0.381443	0.375583	0.369733	0.363969	0.358369	0.353012	0.347973	0.343329	0.339155	0.335521	0.332497	0.330147	0.328533	0.327711	0.327732	0.328641	0.330477	0.333272	0.337049	0.341828	0.347618	0.354424	0.362244	0.37107	0.380889	0.391685	0.403436	0.416117	0.429703	0.444164	0.459469	0.475589	0.492489	0.510138	0.528501	0.547545	0.567234	0.587535	0.608412	0.629828	0.651744	0.674121	0.696916	0.72008	0.743563
2	sub-15	1	20	-1.71464	-1.74064	-1.76549	-1.7891	-1.81141	-1.83235	-1.85186	-1.86988	-1.88636	-1.90124	-1.91448	-1.92606	-1.93593	-1.94407	-1.95047	-1.95512	-1.95802	-1.95917	-1.95861	-1.95634	-1.95241	-1.94686	-1.93973	-1.93108	-1.92097	-1.90949	-1.89669	-1.88268	-1.86752	-1.85133	-1.8342	-1.81624	-1.79755	-1.77825	-1.75845	-1.73826	-1.71781	-1.69721	-1.67658	-1.65603	-1.63568	-1.61565	-1.59603	-1.57694	-1.55847	-1.54072
3	sub-15	1	80	-0.241705	-0.23476	-0.228139	-0.221846	-0.215885	-0.210262	-0.204981	-0.200047	-0.195465	-0.19124	-0.187378	-0.183882	-0.180759	-0.178012	-0.175645	-0.17366	-0.172057	-0.170834	-0.169988	-0.169512	-0.169397	-0.169633	-0.170205	-0.171097	-0.172294	-0.173775	-0.175522	-0.177514	-0.179729	-0.182149	-0.18475	-0.187513	-0.190416	-0.19344	-0.196564	-0.199772	-0.203046	-0.206371	-0.209734	-0.213122	-0.216526	-0.219938	-0.22335	-0.22676	-0.230165	-0.233566
0	sub-16	0	20	-0.664292	-0.662518	-0.660695	-0.658811	-0.656854	-0.654815	-0.652682	-0.650446	-0.648097	-0.645629	-0.643032	-0.640302	-0.63743	-0.634414	-0.631248	-0.627929	-0.624456	-0.620828	-0.617043	-0.613104	-0.609011	-0.604767	-0.600376	-0.595841	-0.591169	-0.586363	-0.58143	-0.576376	-0.571209	-0.565934	-0.56056	-0.555093	-0.549541	-0.543911	-0.53821	-0.532444	-0.526621	-0.520747	-0.514828	-0.508869	-0.502876	-0.496853	-0.490807	-0.48474	-0.478657	-0.472561
1	sub-16	0	80	-0.0356717	-0.0412692	-0.0466957	-0.0519382	-0.0569849	-0.0618256	-0.0664513	-0.0708543	-0.0750286	-0.078969	-0.0826719	-0.0861349	-0.0893566	-0.0923371	-0.0950774	-0.0975797	-0.0998472	-0.101884	-0.103695	-0.105287	-0.106666	-0.107839	-0.108815	-0.109601	-0.110208	-0.110645	-0.110922	-0.111049	-0.111037	-0.110897	-0.110641	-0.110279	-0.109823	-0.109284	-0.108674	-0.108003	-0.107282	-0.106521	-0.105731	-0.10492	-0.104098	-0.103272	-0.10245	-0.101636	-0.100836	-0.100053
2	sub-16	1	20	-1.29328	-1.28367	-1.27376	-1.26353	-1.25298	-1.24208	-1.23083	-1.2192	-1.20718	-1.19476	-1.18192	-1.16865	-1.15493	-1.14076	-1.12613	-1.11102	-1.09544	-1.07938	-1.06285	-1.04584	-1.02837	-1.01043	-0.99206	-0.97326	-0.954056	-0.934471	-0.914534	-0.894276	-0.873732	-0.852939	-0.831938	-0.810773	-0.789489	-0.768132	-0.74675	-0.725393	-0.70411	-0.682949	-0.661958	-0.641183	-0.620671	-0.600464	-0.580603	-0.561124	-0.542064	-0.523453
3	sub-16	1	80	-0.554565	-0.549125	-0.543644	-0.538129	-0.532588	-0.527031	-0.521466	-0.515901	-0.510342	-0.504799	-0.499278	-0.493785	-0.488328	-0.482911	-0.477541	-0.472223	-0.46696	-0.461758	-0.456619	-0.451547	-0.446544	-0.441612	-0.436753	-0.431967	-0.427255	-0.422618	-0.418054	-0.413564	-0.409145	-0.404796	-0.400516	-0.396303	-0.392153	-0.388064	-0.384034	-0.380058	-0.376134	-0.372257	-0.368424	-0.36463	-0.360871	-0.357143	-0.353441	-0.349761	-0.346097	-0.342445
0	sub-18	0	20	-0.585789	-0.578136	-0.570358	-0.562469	-0.554484	-0.54642	-0.538296	-0.530129	-0.521939	-0.513747	-0.505572	-0.497434	-0.489354	-0.48135	-0.473443	-0.465651	-0.45799	-0.450478	-0.44313	-0.435958	-0.428974	-0.42219	-0.415613	-0.409249	-0.403105	-0.397183	-0.391483	-0.386007	-0.38075	-0.375709	-0.370793	-0.366166	-0.361734	-0.357487	-0.353415	-0.349504	-0.345744	-0.342121	-0.338623	-0.335236	-0.331947	-0.328742	-0.325608	-0.322531	-0.319499	-0.316499
1	sub-18	0	80	0.363538	0.362038	0.360113	0.357799	0.355136	0.352169	0.348944	0.345513	0.341929	0.338247	0.334525	0.33082	0.327192	0.323699	0.320398	0.317346	0.314597	0.312203	0.310214	0.308673	0.307622	0.307099	0.307135	0.307758	0.308992	0.310853	0.313354	0.316503	0.320301	0.324745	0.329827	0.335533	0.341845	0.348739	0.356187	0.364156	0.372611	0.38151	0.390809	0.400462	0.410419	0.420629	0.431038	0.441594	0.452241	0.462924
2	sub-18	1	20	0.0237075	0.0302611	0.0374489	0.0452386	0.0535917	0.0624636	0.0718044	0.0815585	0.0916658	0.102062	0.112677	0.123441	0.134277	0.145107	0.155852	0.16643	0.176759	0.186754	0.196333	0.205413	0.213913	0.221754	0.228859	0.235156	0.240577	0.245058	0.248542	0.250978	0.252324	0.252541	0.251603	0.24949	0.246191	0.241702	0.236029	0.229185	0.221191	0.212079	0.201884	0.190652	0.178433	0.165285	0.151269	0.13645	0.120896	0.104678
3	sub-18	1	80	-0.0490606	-0.0478278	-0.0467074	-0.0456995	-0.0447821	-0.0439981	-0.0433245	-0.0427601	-0.0422813	-0.0419295	-0.0416804	-0.0415314	-0.0414795	-0.0415212	-0.0416532	-0.0418714	-0.0421718	-0.0425499	-0.043001	-0.0435203	-0.044081	-0.0447214	-0.0454145	-0.0461549	-0.0469375	-0.0477568	-0.048586	-0.0494632	-0.0503613	-0.0512751	-0.0521993	-0.0531287	-0.0540581	-0.0549825	-0.0558972	-0.0567759	-0.0576362	-0.0584954	-0.0592848	-0.0600875	-0.0608564	-0.0615881	-0.0622792	-0.0629263	-0.0635263	-0.0640758
0	sub-19	0	20	0.0398091	0.0407377	0.0419506	0.0434443	0.045214	0.0472532	0.0495537	0.052106	0.054899	0.0579201	0.0611556	0.0645902	0.068208	0.0719917	0.0759233	0.0799843	0.0841552	0.0884162	0.0927471	0.0971274	0.101536	0.105952	0.110355	0.114723	0.119036	0.123273	0.127414	0.13144	0.135332	0.139072	0.142645	0.146034	0.149224	0.152204	0.154961	0.157486	0.159769	0.161804	0.163586	0.165111	0.166377	0.167383	0.168132	0.168626	0.168869	0.168867
1	sub-19	0	80	-0.0761119	-0.0771548	-0.0781544	-0.0791143	-0.0800373	-0.0809258	-0.0817818	-0.0826068	-0.0834017	-0.0841674	-0.084904	-0.0856116	-0.0862902	-0.0869395	-0.087559	-0.0881483	-0.0887071	-0.0892349	-0.0897314	-0.0901966	-0.0906306	-0.0910336	-0.0914063	-0.0917494	-0.092064	-0.0923515	-0.0926135	-0.0928517	-0.0930684	-0.0932658	-0.0934467	-0.093614	-0.0937711	-0.0939213	-0.0940686	-0.094217	-0.0943707	-0.0945343	-0.0934452	-0.0936466	-0.0938722	-0.0941271	-0.094416	-0.0947439	-0.0951153	-0.0955346
2	sub-19	1	20	0.216936	0.216875	0.216528	0.215893	0.214969	0.213757	0.212257	0.210472	0.208406	0.206063	0.203448	0.200569	0.197431	0.194045	0.190419	0.186563	0.18249	0.178212	0.173742	0.169093	0.164282	0.159322	0.154231	0.149024	0.143718	0.13833	0.132876	0.127373	0.121837	0.116286	0.110733	0.105196	0.0996894	0.094227	0.0888232	0.0834917	0.0782457	0.0730979	0.0680605	0.0631456	0.0583647	0.0537289	0.049249	0.0449355	0.0407982	0.0368466
3	sub-19	1	80	-0.226439	-0.225891	-0.225377	-0.224627	-0.224173	-0.223743	-0.223333	-0.222941	-0.22256	-0.222188	-0.22182	-0.22145	-0.221075	-0.22069	-0.220022	-0.219601	-0.218886	-0.218408	-0.217892	-0.217333	-0.216724	-0.21606	-0.215333	-0.214537	-0.213667	-0.212715	-0.211675	-0.210272	-0.209037	-0.207694	-0.206238	-0.204663	-0.202697	-0.200869	-0.198641	-0.196543	-0.194306	-0.191926	-0.189402	-0.186733	-0.183919	-0.180961	-0.17786	-0.17462	-0.171244	-0.167737
0	sub-20	0	20	-0.105771	-0.104924	-0.104027	-0.103086	-0.102105	-0.101089	-0.100044	-0.0989764	-0.0978913	-0.0967954	-0.0956956	-0.0945991	-0.0935135	-0.0924467	-0.0914073	-0.0904041	-0.0894465	-0.0885439	-0.0877065	-0.0869444	-0.086268	-0.085688	-0.0852151	-0.0848598	-0.0846324	-0.084543	-0.0846011	-0.0848158	-0.085195	-0.0857464	-0.086476	-0.0873893	-0.0884901	-0.089781	-0.0912632	-0.0929362	-0.0947981	-0.0968452	-0.0990722	-0.101472	-0.104037	-0.106756	-0.109618	-0.11261	-0.115719	-0.118928
1	sub-20	0	80	-0.246932	-0.244577	-0.242065	-0.239398	-0.236581	-0.233616	-0.230507	-0.227256	-0.223868	-0.220343	-0.216685	-0.212895	-0.208976	-0.204929	-0.200756	-0.19646	-0.192041	-0.187505	-0.182853	-0.178091	-0.173224	-0.168258	-0.163201	-0.158062	-0.15285	-0.147576	-0.142253	-0.136893	-0.13151	-0.126118	-0.120732	-0.115366	-0.109463	-0.104185	-0.0983992	-0.0932665	-0.0882267	-0.0832932	-0.0784788	-0.0737951	-0.069253	-0.0648619	-0.0606301	-0.056565	-0.0526725	-0.0489579
2	sub-20	1	20	-0.95245	-0.950595	-0.948662	-0.946641	-0.944523	-0.942299	-0.939957	-0.937488	-0.934879	-0.932121	-0.929201	-0.926108	-0.92283	-0.919354	-0.915669	-0.911763	-0.907622	-0.903237	-0.898594	-0.893682	-0.88849	-0.88301	-0.877231	-0.871146	-0.864748	-0.858033	-0.850996	-0.843636	-0.835951	-0.827944	-0.819616	-0.81097	-0.802013	-0.792751	-0.783192	-0.773344	-0.763219	-0.752827	-0.74218	-0.731293	-0.720177	-0.708849	-0.697323	-0.685616	-0.673745	-0.661728
3	sub-20	1	80	-0.058682	-0.060864	-0.0629937	-0.0650692	-0.0670886	-0.0690504	-0.0709536	-0.072797	-0.0745064	-0.0762282	-0.077888	-0.0794852	-0.0810191	-0.0824893	-0.0838951	-0.0852359	-0.0865112	-0.0877201	-0.088862	-0.0899359	-0.0909407	-0.0918755	-0.0927388	-0.0934558	-0.0941724	-0.0948134	-0.0953773	-0.0958629	-0.0962691	-0.0965213	-0.096766	-0.0969288	-0.0970095	-0.0970079	-0.0969242	-0.0967589	-0.0965127	-0.0961869	-0.095783	-0.0953028	-0.0947487	-0.0941231	-0.0934291	-0.09267	-0.0918491	-0.0909703
0	sub-21	0	20	-0.177968	-0.176115	-0.174131	-0.172014	-0.169762	-0.167375	-0.164853	-0.162198	-0.159415	-0.156508	-0.153483	-0.150346	-0.147106	-0.14377	-0.140348	-0.136849	-0.133282	-0.129657	-0.125984	-0.122273	-0.118534	-0.114776	-0.111009	-0.107242	-0.103484	-0.099746	-0.0960358	-0.0923634	-0.0887382	-0.0851701	-0.0816689	-0.0782449	-0.0749084	-0.0716699	-0.06854	-0.0655295	-0.0626487	-0.0599082	-0.0573181	-0.0548884	-0.0526285	-0.0505474	-0.0486533	-0.0469541	-0.0454566	-0.0441667
1	sub-21	0	80	-0.989958	-0.966943	-0.945073	-0.924343	-0.90474	-0.886248	-0.868844	-0.852503	-0.837195	-0.822887	-0.809542	-0.79712	-0.785578	-0.774869	-0.764945	-0.755756	-0.747251	-0.739375	-0.732075	-0.725297	-0.718986	-0.713087	-0.707549	-0.702318	-0.697343	-0.692578	-0.687974	-0.683487	-0.679077	-0.674704	-0.670333	-0.66593	-0.661468	-0.656917	-0.652256	-0.647462	-0.642517	-0.637406	-0.632116	-0.626637	-0.620962	-0.615087	-0.60901	-0.602732	-0.596255	-0.589583
2	sub-21	1	20	1.52343	1.50943	1.4951	1.48044	1.46544	1.45009	1.43439	1.41832	1.40189	1.38508	1.36789	1.35032	1.33236	1.314	1.29526	1.27613	1.25662	1.23673	1.21646	1.19584	1.17487	1.15356	1.13194	1.11002	1.08782	1.06537	1.0427	1.01984	0.996815	0.973659	0.950409	0.9271	0.90377	0.880457	0.8572	0.834038	0.811009	0.788155	0.765516	0.74313	0.721038	0.69928	0.677895	0.65692	0.636393	0.616349
3	sub-21	1	80	-0.414476	-0.409325	-0.404189	-0.399069	-0.393969	-0.388891	-0.383836	-0.378807	-0.373806	-0.368833	-0.363892	-0.358983	-0.354109	-0.349272	-0.344474	-0.339718	-0.335007	-0.330345	-0.325735	-0.321182	-0.31669	-0.312263	-0.307908	-0.303627	-0.299428	-0.295314	-0.291292	-0.287364	-0.283537	-0.279813	-0.276198	-0.272695	-0.269306	-0.266034	-0.262882	-0.25985	-0.25694	-0.254152	-0.251484	-0.248937	-0.246508	-0.244195	-0.241996	-0.239907	-0.237925	-0.236046
0	sub-23	0	20	0.284345	0.282978	0.281525	0.279981	0.278342	0.276602	0.274756	0.272798	0.270724	0.268528	0.266206	0.263754	0.261165	0.258437	0.255565	0.252544	0.249372	0.246045	0.242557	0.238907	0.23509	0.231104	0.226944	0.222609	0.218096	0.213402	0.208528	0.203472	0.198235	0.192818	0.187224	0.181455	0.175518	0.169416	0.163157	0.156748	0.150199	0.14352	0.136723	0.12982	0.122823	0.115749	0.108611	0.101427	0.0942107	0.0869809
1	sub-23	0	80	0.292171	0.286712	0.281255	0.275805	0.270366	0.264945	0.259545	0.254172	0.24883	0.243525	0.238259	0.233037	0.227863	0.22274	0.21767	0.212657	0.207702	0.202807	0.198172	0.193399	0.188689	0.184041	0.179455	0.17493	0.170464	0.166056	0.161704	0.157406	0.15316	0.148963	0.144813	0.140906	0.136841	0.132816	0.128828	0.124875	0.120955	0.117065	0.113206	0.109375	0.105571	0.101795	0.0980456	0.0943237	0.0906295	0.0869639
2	sub-23	1	20	0.201146	0.198826	0.196381	0.193823	0.191161	0.188405	0.185566	0.182656	0.179684	0.176662	0.173601	0.170512	0.167405	0.164291	0.161178	0.158075	0.154992	0.151934	0.148908	0.14592	0.142975	0.140076	0.137225	0.134426	0.131679	0.128984	0.126341	0.12375	0.121207	0.118711	0.116259	0.113847	0.11147	0.109124	0.106804	0.104505	0.10222	0.0999428	0.0976675	0.0953874	0.0930958	0.0907861	0.0884517	0.0860862	0.0836836	0.0812383
3	sub-23	1	80	0.0969653	0.096155	0.0953298	0.0944795	0.0935943	0.0926649	0.0916821	0.0906373	0.0895224	0.0883298	0.0870526	0.0856846	0.08422	0.0826541	0.0809826	0.0792024	0.0773108	0.0753063	0.0731882	0.0709565	0.0686123	0.0661574	0.0636944	0.0610268	0.0582592	0.0553969	0.052446	0.0494131	0.0463057	0.043132	0.0399007	0.036621	0.0333028	0.0299561	0.0265915	0.0232197	0.0198517	0.0164983	0.0131708	0.00988007	0.00663695	0.00345207	0.000335737	-0.00270218	-0.0056523	-0.00850582
0	sub-24	0	20	-1.03847	-1.02493	-1.0106	-0.995519	-0.979727	-0.963268	-0.946185	-0.928523	-0.910328	-0.891648	-0.872529	-0.853016	-0.833157	-0.812997	-0.79258	-0.77195	-0.751148	-0.730215	-0.709187	-0.688101	-0.666989	-0.645881	-0.624806	-0.603789	-0.582854	-0.562022	-0.541313	-0.520744	-0.500331	-0.480088	-0.460027	-0.440157	-0.420487	-0.401023	-0.381769	-0.36273	-0.343907	-0.325302	-0.306914	-0.288743	-0.270787	-0.253043	-0.235509	-0.217987	-0.20086	-0.183928
1	sub-24	0	80	0.0108451	0.0211099	0.0313005	0.0413923	0.0513625	0.0611903	0.0708566	0.0803447	0.0896399	0.0987294	0.107603	0.11633	0.124745	0.132924	0.140861	0.148556	0.156007	0.163216	0.170183	0.17691	0.183401	0.189659	0.195688	0.201492	0.207075	0.21244	0.217592	0.222534	0.22727	0.231804	0.236138	0.240275	0.244216	0.247962	0.251513	0.25487	0.258108	0.261068	0.263825	0.266376	0.268716	0.270838	0.272738	0.274409	0.275845	0.27704
2	sub-24	1	20	0.0637974	0.0374825	0.0110598	-0.0153957	-0.0418068	-0.0680941	-0.0941765	-0.119971	-0.145395	-0.170362	-0.194791	-0.218596	-0.241695	-0.264007	-0.285453	-0.305955	-0.325436	-0.343824	-0.361048	-0.37704	-0.391734	-0.405071	-0.416994	-0.42745	-0.436392	-0.443777	-0.449567	-0.453731	-0.456239	-0.457072	-0.456212	-0.453649	-0.449378	-0.443402	-0.435729	-0.426373	-0.415356	-0.402706	-0.388058	-0.372257	-0.354947	-0.336186	-0.316033	-0.294558	-0.271835	-0.247944
3	sub-24	1	80	0.295324	0.294683	0.293928	0.293074	0.292131	0.291113	0.290034	0.288908	0.287751	0.286576	0.2854	0.284237	0.283102	0.282012	0.280979	0.28002	0.279147	0.278374	0.277712	0.277173	0.276766	0.276499	0.276381	0.276418	0.276615	0.276977	0.277507	0.278207	0.279077	0.280116	0.281321	0.282688	0.284212	0.285885	0.287699	0.289646	0.291714	0.293892	0.296169	0.298531	0.300965	0.303456	0.305989	0.30855	0.311122	0.31369
0	sub-25	0	20	-0.638339	-0.631644	-0.624972	-0.618339	-0.611763	-0.605261	-0.59885	-0.592545	-0.586363	-0.580316	-0.574418	-0.568681	-0.563113	-0.557724	-0.552519	-0.547503	-0.542678	-0.538046	-0.533604	-0.529348	-0.525273	-0.521371	-0.517633	-0.514046	-0.510598	-0.507273	-0.504055	-0.500925	-0.497865	-0.494854	-0.491869	-0.488889	-0.485888	-0.482842	-0.479725	-0.476511	-0.473175	-0.469688	-0.466027	-0.462165	-0.458078	-0.453743	-0.44914	-0.44425	-0.439056	-0.433545
1	sub-25	0	80	0.0356773	0.0344282	0.0332591	0.0321773	0.0311897	0.0303026	0.0295214	0.0288507	0.0282941	0.03017	0.0298408	0.0296303	0.0295378	0.029562	0.0297004	0.0299499	0.0303065	0.0307654	0.0313213	0.0319678	0.0326983	0.0335053	0.034381	0.0353168	0.0363039	0.0373332	0.0383952	0.0394802	0.0405785	0.0416807	0.0427773	0.0438593	0.0449181	0.0459455	0.0469341	0.0478772	0.0487688	0.049604	0.0503787	0.0510897	0.0517348	0.0523126	0.0528227	0.0532652	0.0536413	0.0539525
2	sub-25	1	20	-0.634982	-0.629483	-0.623888	-0.618206	-0.612449	-0.606625	-0.600744	-0.594817	-0.588854	-0.582864	-0.576857	-0.570844	-0.564835	-0.558838	-0.552865	-0.546926	-0.541029	-0.535186	-0.529407	-0.523702	-0.518082	-0.512556	-0.507137	-0.501833	-0.496657	-0.491619	-0.486731	-0.482003	-0.477447	-0.473074	-0.468896	-0.464922	-0.461164	-0.45763	-0.454328	-0.451266	-0.44845	-0.445884	-0.443572	-0.441514	-0.439711	-0.438162	-0.436864	-0.435813	-0.435004	-0.434431
3	sub-25	1	80	-0.23088	-0.230293	-0.229623	-0.228864	-0.228012	-0.227063	-0.226016	-0.224866	-0.223615	-0.222262	-0.220806	-0.219249	-0.217594	-0.21584	-0.213992	-0.212051	-0.21002	-0.207903	-0.205702	-0.203421	-0.201061	-0.198626	-0.196119	-0.193542	-0.190896	-0.188185	-0.185409	-0.182569	-0.179667	-0.176705	-0.173683	-0.170603	-0.167465	-0.164272	-0.161026	-0.157727	-0.154379	-0.150984	-0.147546	-0.144067	-0.140552	-0.137005	-0.133431	-0.129833	-0.126219	-0.122593
0	sub-26	0	20	0.336587	0.333271	0.329968	0.326675	0.323392	0.320116	0.316843	0.313571	0.310293	0.307004	0.303699	0.300371	0.297012	0.293616	0.290175	0.28668	0.283124	0.279498	0.279331	0.275533	0.271642	0.267653	0.263559	0.259354	0.255034	0.250595	0.246034	0.241349	0.236538	0.231603	0.226546	0.221368	0.216074	0.210669	0.205159	0.199552	0.193857	0.188082	0.182238	0.176336	0.170387	0.164404	0.158397	0.152381	0.146368	0.140369
1	sub-26	0	80	-0.299781	-0.297705	-0.295596	-0.293455	-0.291286	-0.289087	-0.28686	-0.284604	-0.282318	-0.279999	-0.277646	-0.275256	-0.272827	-0.270356	-0.26784	-0.265276	-0.262662	-0.259993	-0.257268	-0.254483	-0.251635	-0.248722	-0.245742	-0.242692	-0.239571	-0.236376	-0.233107	-0.229763	-0.226342	-0.222846	-0.219275	-0.215629	-0.211909	-0.208118	-0.204257	-0.200329	-0.196337	-0.192285	-0.188176	-0.184014	-0.179802	-0.175547	-0.17125	-0.166918	-0.162553	-0.15816
2	sub-26	1	20	-0.138344	-0.145869	-0.15315	-0.160174	-0.16693	-0.173407	-0.179598	-0.185493	-0.191088	-0.196378	-0.201363	-0.206042	-0.21042	-0.214503	-0.218298	-0.221818	-0.225075	-0.228086	-0.230867	-0.23344	-0.235824	-0.238042	-0.240117	-0.242075	-0.243938	-0.245732	-0.247482	-0.24921	-0.25094	-0.252694	-0.254493	-0.256355	-0.258301	-0.260345	-0.262504	-0.26479	-0.267216	-0.269792	-0.272526	-0.275425	-0.278494	-0.281735	-0.285151	-0.28874	-0.292501	-0.296429
3	sub-26	1	80	0.253041	0.249752	0.247373	0.244103	0.240841	0.237584	0.234328	0.23107	0.228705	0.225432	0.222147	0.218847	0.215529	0.212189	0.208824	0.205432	0.202009	0.198553	0.195063	0.191536	0.187971	0.184367	0.180725	0.177043	0.173324	0.169567	0.165776	0.161952	0.158099	0.154221	0.150321	0.146404	0.142476	0.138542	0.134608	0.131577	0.127661	0.123765	0.119896	0.116063	0.112272	0.108531	0.104848	0.10123	0.0976839	0.094218
0	sub-27	0	20	-0.280337	-0.278363	-0.276191	-0.273821	-0.271258	-0.268505	-0.265569	-0.262455	-0.259171	-0.255725	-0.252127	-0.248387	-0.244514	-0.240518	-0.23641	-0.232199	-0.227896	-0.223511	-0.219052	-0.214529	-0.209949	-0.20532	-0.200649	-0.195941	-0.191199	-0.186429	-0.181631	-0.176807	-0.171957	-0.16708	-0.162174	-0.157236	-0.152262	-0.147247	-0.142188	-0.137078	-0.131913	-0.126686	-0.121392	-0.116026	-0.110582	-0.105053	-0.0994367	-0.0937266	-0.087919	-0.0820105
1	sub-27	0	80	0.250229	0.250384	0.250209	0.249711	0.248899	0.247783	0.246377	0.244694	0.24275	0.240562	0.238148	0.235528	0.232723	0.229754	0.226642	0.22341	0.22008	0.216672	0.213209	0.209709	0.206193	0.202678	0.199181	0.195716	0.192298	0.188939	0.185647	0.182431	0.179296	0.176248	0.173287	0.170415	0.167629	0.164925	0.162299	0.159743	0.157249	0.154809	0.15241	0.150042	0.147692	0.145347	0.142993	0.140618	0.138208	0.135748
2	sub-27	1	20	-0.242828	-0.218606	-0.192162	-0.163581	-0.13296	-0.100408	-0.0660416	-0.0299857	0.00762535	0.0466497	0.0869388	0.128337	0.170685	0.213817	0.257564	0.301756	0.34622	0.390784	0.435275	0.479523	0.523361	0.566625	0.609153	0.650791	0.691387	0.730799	0.76889	0.805531	0.8406	0.873987	0.905587	0.935307	0.963061	0.988776	1.01239	1.03383	1.05307	1.07007	1.08479	1.09723	1.10737	1.11521	1.12077	1.12407	1.12514	1.12401
3	sub-27	1	80	-0.00388822	-0.0046897	-0.00548633	-0.00627782	-0.00706385	-0.00784404	-0.0086179	-0.0093849	-0.0101444	-0.0108955	-0.0116375	-0.0123693	-0.0130898	-0.0137979	-0.0144923	-0.0151718	-0.0158351	-0.016481	-0.0171081	-0.0177155	-0.018302	-0.0188666	-0.0194084	-0.0199267	-0.0204208	-0.0208898	-0.0213332	-0.0217502	-0.0221403	-0.0225028	-0.022837	-0.0231423	-0.0234182	-0.0236642	-0.02388	-0.0240652	-0.0242198	-0.024344	-0.024438	-0.0245026	-0.0245385	-0.024547	-0.0245297	-0.0244882	-0.0244249	-0.0243421
0	sub-31	0	20	-0.611204	-0.603166	-0.595334	-0.587683	-0.580189	-0.572826	-0.565568	-0.558391	-0.551271	-0.544184	-0.537108	-0.530022	-0.522907	-0.515743	-0.508514	-0.501204	-0.493798	-0.486285	-0.478652	-0.470889	-0.462988	-0.454942	-0.446743	-0.438388	-0.429873	-0.421195	-0.412353	-0.403348	-0.394181	-0.384855	-0.375375	-0.365746	-0.355975	-0.34607	-0.336041	-0.325899	-0.315654	-0.30532	-0.294908	-0.284434	-0.273911	-0.263354	-0.252777	-0.242195	-0.231623	-0.221074
1	sub-31	0	80	-0.736484	-0.733152	-0.729879	-0.726682	-0.72358	-0.720592	-0.717736	-0.715028	-0.712484	-0.710117	-0.707939	-0.705962	-0.704194	-0.702639	-0.701302	-0.700183	-0.699282	-0.698593	-0.698111	-0.697824	-0.697721	-0.697787	-0.698004	-0.698353	-0.698809	-0.69935	-0.699948	-0.700574	-0.701199	-0.701791	-0.702318	-0.702746	-0.703043	-0.703174	-0.703105	-0.702804	-0.702237	-0.701372	-0.700178	-0.698625	-0.696685	-0.694332	-0.691542	-0.688293	-0.684565	-0.680343
2	sub-31	1	20	-0.339273	-0.353581	-0.367884	-0.382151	-0.396345	-0.410428	-0.42436	-0.438099	-0.4516	-0.464816	-0.477699	-0.4902	-0.502269	-0.513858	-0.524917	-0.535398	-0.545255	-0.554442	-0.562917	-0.57064	-0.577571	-0.583676	-0.588922	-0.59328	-0.596722	-0.599227	-0.600773	-0.601344	-0.600926	-0.599507	-0.597081	-0.593643	-0.58919	-0.583724	-0.57725	-0.569774	-0.561307	-0.551861	-0.541452	-0.530099	-0.517824	-0.504654	-0.490619	-0.475752	-0.460093	-0.443686
3	sub-31	1	80	-0.371175	-0.367566	-0.363873	-0.360093	-0.356224	-0.352267	-0.34822	-0.344083	-0.339858	-0.335544	-0.331143	-0.326657	-0.322087	-0.317436	-0.312707	-0.307903	-0.303027	-0.298085	-0.29308	-0.288018	-0.282905	-0.277748	-0.272553	-0.267327	-0.26208	-0.256817	-0.251548	-0.246281	-0.241025	-0.235788	-0.230579	-0.225407	-0.22028	-0.215208	-0.210198	-0.205259	-0.200399	-0.195625	-0.190945	-0.186365	-0.181892	-0.177533	-0.173292	-0.169176	-0.165188	-0.161334
0	sub-32	0	20	-0.798781	-0.791042	-0.783088	-0.774936	-0.766604	-0.758111	-0.749477	-0.740724	-0.731875	-0.722953	-0.713983	-0.704987	-0.695991	-0.687018	-0.678091	-0.669235	-0.660471	-0.651823	-0.643309	-0.634952	-0.626769	-0.618777	-0.610993	-0.603428	-0.596094	-0.589001	-0.582153	-0.575557	-0.569213	-0.56312	-0.557277	-0.551678	-0.546316	-0.538164	-0.533263	-0.528571	-0.524076	-0.519763	-0.51562	-0.511631	-0.507782	-0.501034	-0.497425	-0.493906	-0.490463	-0.487078
1	sub-32	0	80	-0.955432	-0.963288	-0.970842	-0.978065	-0.984927	-0.991396	-0.99744	-1.00303	-1.00812	-1.01267	-1.01667	-1.02005	-1.0228	-1.02486	-1.0262	-1.02679	-1.02659	-1.02555	-1.02366	-1.02087	-1.01716	-1.01249	-1.00684	-1.00019	-0.992517	-0.983805	-0.97404	-0.963211	-0.951311	-0.938337	-0.924288	-0.909167	-0.892982	-0.875744	-0.857468	-0.838172	-0.817878	-0.796614	-0.77441	-0.751302	-0.72733	-0.702538	-0.676977	-0.650701	-0.62377	-0.596248
2	sub-32	1	20	6.49159	6.45432	6.41703	6.37973	6.34239	6.30502	6.26761	6.23016	6.19266	6.15509	6.11747	6.07978	6.04201	6.00417	5.96624	5.92823	5.89012	5.85191	5.8136	5.77518	5.73665	5.698	5.65924	5.62035	5.58134	5.54219	5.50291	5.4635	5.42394	5.38424	5.3444	5.30441	5.26428	5.22399	5.18355	5.14295	5.1022	5.0613	5.02024	4.97903	4.93766	4.89613	4.85446	4.81263	4.77066	4.72854
3	sub-32	1	80	-0.579603	-0.579157	-0.578813	-0.57857	-0.578424	-0.578373	-0.578411	-0.578534	-0.578736	-0.579011	-0.579351	-0.579748	-0.579355	-0.579841	-0.580357	-0.58089	-0.581428	-0.581123	-0.580801	-0.581286	-0.581723	-0.582097	-0.582393	-0.582594	-0.582684	-0.581808	-0.581628	-0.581287	-0.580769	-0.580058	-0.5783	-0.577159	-0.575781	-0.574153	-0.572263	-0.570098	-0.567649	-0.564068	-0.561027	-0.557678	-0.554015	-0.550034	-0.545734	-0.541112	-0.53617	-0.530911
0	sub-33	0	20	0.212755	0.224253	0.235901	0.24767	0.259528	0.271437	0.283361	0.295259	0.307086	0.318799	0.330348	0.341685	0.35276	0.363522	0.373917	0.383896	0.393405	0.402396	0.410816	0.418618	0.425752	0.432172	0.43783	0.442681	0.44668	0.449784	0.451951	0.453144	0.453324	0.452458	0.450515	0.447469	0.443296	0.437979	0.431505	0.423866	0.41506	0.405092	0.393972	0.381717	0.368352	0.353907	0.338419	0.321932	0.304496	0.286166
1	sub-33	0	80	-0.137547	-0.164945	-0.191524	-0.217263	-0.242146	-0.266162	-0.289301	-0.311557	-0.332931	-0.353422	-0.373035	-0.39178	-0.409666	-0.426707	-0.44292	-0.458323	-0.472937	-0.486786	-0.499895	-0.512292	-0.524007	-0.535072	-0.545521	-0.555388	-0.564711	-0.573528	-0.581878	-0.589801	-0.597338	-0.60453	-0.611416	-0.618038	-0.624434	-0.630642	-0.636699	-0.64264	-0.648497	-0.654301	-0.660081	-0.665864	-0.669256	-0.67513	-0.681078	-0.687122	-0.693281	-0.699574
2	sub-33	1	20	-0.152555	-0.152759	-0.153221	-0.153916	-0.154821	-0.15591	-0.157162	-0.158551	-0.160055	-0.161649	-0.163308	-0.165009	-0.166724	-0.168427	-0.170091	-0.171685	-0.173182	-0.174547	-0.17575	-0.176756	-0.17753	-0.178035	-0.178234	-0.178091	-0.17757	-0.176633	-0.175248	-0.17338	-0.171	-0.168079	-0.164592	-0.160515	-0.15583	-0.150521	-0.144575	-0.137987	-0.130751	-0.122868	-0.114346	-0.105192	-0.0954212	-0.0850526	-0.0741091	-0.062618	-0.0506112	-0.0381245
3	sub-33	1	80	0.0645724	0.065586	0.0668898	0.0684625	0.0702815	0.0723229	0.0745616	0.0769712	0.0795249	0.0821944	0.0849514	0.0877664	0.0906098	0.0934515	0.0962609	0.0990077	0.101662	0.104193	0.106572	0.10877	0.11076	0.112514	0.114007	0.115214	0.116114	0.116683	0.116903	0.116755	0.116222	0.115291	0.113947	0.112181	0.109983	0.107346	0.104264	0.100733	0.0967519	0.0923197	0.0874374	0.0821074	0.0763331	0.0701194	0.0634721	0.0563981	0.0489054	0.041003
[truncated: 1,704 more columns]

## Sheet: panel E
subject	correct	frequency	pupil_target_locked_t1
sub-1	0	20	-0.360635
sub-1	0	80	0.837868
sub-1	1	20	-0.821548
sub-1	1	80	-0.454599
sub-10	0	20	-0.703457
sub-10	0	80	-1.5017
sub-10	1	20	7.12834
sub-10	1	80	-2.16834
sub-11	0	20	-2.46675
sub-11	0	80	-3.62402
sub-11	1	20	-6.36869
sub-11	1	80	-2.27961
sub-12	0	20	1.52766
sub-12	0	80	1.72265
sub-12	1	20	1.57694
sub-12	1	80	0.0354631
sub-13	0	20	-1.01928
sub-13	0	80	-5.0344
sub-13	1	20	-3.10344
sub-13	1	80	-3.26397
sub-14	0	20	1.44596
sub-14	0	80	-1.98025
sub-14	1	20	-5.2182
sub-14	1	80	-2.31592
sub-15	0	20	0.681033
sub-15	0	80	-1.58044
sub-15	1	20	5.61523
sub-15	1	80	-0.0905509
sub-16	0	20	0.694588
sub-16	0	80	-1.20045
sub-16	1	20	-0.70032
sub-16	1	80	-1.08081
sub-18	0	20	1.36401
sub-18	0	80	-1.03625
sub-18	1	20	2.12974
sub-18	1	80	-1.56347
sub-19	0	20	-0.297781
sub-19	0	80	0.687066
sub-19	1	20	1.2209
sub-19	1	80	-0.246888
sub-20	0	20	0.800583
sub-20	0	80	0.355391
sub-20	1	20	2.03586
sub-20	1	80	0.132792
sub-21	0	20	3.42776
sub-21	0	80	-0.380162
sub-21	1	20	3.57499
sub-21	1	80	0.504004
sub-23	0	20	-0.639535
sub-23	0	80	0.2217
sub-23	1	20	2.20757
sub-23	1	80	0.220017
sub-24	0	20	-2.85405
sub-24	0	80	-1.0639
sub-24	1	20	0.141613
sub-24	1	80	-1.66234
sub-25	0	20	-1.89763
sub-25	0	80	-2.63379
sub-25	1	20	-3.46537
sub-25	1	80	-2.72803
sub-26	0	20	-2.31705
sub-26	0	80	-1.57137
sub-26	1	20	-1.54842
sub-26	1	80	-1.603
sub-27	0	20	1.76281
sub-27	0	80	0.563299
sub-27	1	20	1.65057
sub-27	1	80	0.601181
sub-31	0	20	3.08149
sub-31	0	80	4.21592
sub-31	1	20	5.26329
sub-31	1	80	0.35075
sub-32	0	20	5.19612
sub-32	0	80	-0.253453
sub-32	1	20	1.58708
sub-32	1	80	1.51797
sub-33	0	20	3.18528
sub-33	0	80	1.65142
sub-33	1	20	0.516052
sub-33	1	80	0.105885
sub-4	0	20	1.51085
sub-4	0	80	1.66948
sub-4	1	20	-2.54392
sub-4	1	80	-0.283874
sub-5	0	20	2.06912
sub-5	0	80	1.72398
sub-5	1	20	0.890201
sub-5	1	80	1.1426
sub-7	0	20	2.1307
sub-7	0	80	0.452667
sub-7	1	20	-2.65452
sub-7	1	80	-0.78638
sub-9	0	20	2.37731
sub-9	0	80	0.639329
sub-9	1	20	-0.261354
sub-9	1	80	-0.3183

## Sheet: panel F
subject	correct	frequency	pupil_target_locked_t2
sub-1	0	20	0.749552
sub-1	0	80	-0.807136
sub-1	1	20	-0.66402
sub-1	1	80	-0.331266
sub-10	0	20	-0.482538
sub-10	0	80	0.817133
sub-10	1	20	2.91314
sub-10	1	80	-1.20078
sub-11	0	20	-1.93885
sub-11	0	80	-1.3305
sub-11	1	20	-7.50379
sub-11	1	80	-1.18192
sub-12	0	20	1.89722
sub-12	0	80	0.730623
sub-12	1	20	1.24552
sub-12	1	80	0.273167
sub-13	0	20	-0.768657
sub-13	0	80	-3.78508
sub-13	1	20	-8.93284
sub-13	1	80	-4.53504
sub-14	0	20	5.83653
sub-14	0	80	0.225462
sub-14	1	20	-2.98657
sub-14	1	80	-0.225371
sub-15	0	20	2.72386
sub-15	0	80	-0.506494
sub-15	1	20	0.766904
sub-15	1	80	-1.33876
sub-16	0	20	-3.54352
sub-16	0	80	-9.05541
sub-16	1	20	-7.24417
sub-16	1	80	-4.90187
sub-18	0	20	-0.306172
sub-18	0	80	-0.540569
sub-18	1	20	-5.85377
sub-18	1	80	-1.88853
sub-19	0	20	-2.31018
sub-19	0	80	-0.63227
sub-19	1	20	-1.33415
sub-19	1	80	-1.01965
sub-20	0	20	0.0556125
sub-20	0	80	-2.05806
sub-20	1	20	0.226451
sub-20	1	80	0.103357
sub-21	0	20	0.723007
sub-21	0	80	-4.18489
sub-21	1	20	-2.42452
sub-21	1	80	-2.60976
sub-23	0	20	-0.112079
sub-23	0	80	0.624896
sub-23	1	20	1.55747
sub-23	1	80	0.531224
sub-24	0	20	-4.34064
sub-24	0	80	-1.5301
sub-24	1	20	-0.672583
sub-24	1	80	-2.49864
sub-25	0	20	0.078069
sub-25	0	80	-0.945588
sub-25	1	20	-0.808156
sub-25	1	80	-0.525892
sub-26	0	20	-2.43659
sub-26	0	80	-2.20071
sub-26	1	20	-2.5617
sub-26	1	80	-0.441405
sub-27	0	20	-0.124206
sub-27	0	80	-3.79953
sub-27	1	20	-3.6905
sub-27	1	80	-3.41041
sub-31	0	20	3.87148
sub-31	0	80	-4.57563
sub-31	1	20	6.97231
sub-31	1	80	1.50996
sub-32	0	20	3.07467
sub-32	0	80	-4.66102
sub-32	1	20	-1.87398
sub-32	1	80	0.962419
sub-33	0	20	-0.264898
sub-33	0	80	-1.97035
sub-33	1	20	-4.54582
sub-33	1	80	-3.66228
sub-4	0	20	-1.05429
sub-4	0	80	-2.58841
sub-4	1	20	2.6478
sub-4	1	80	-0.142528
sub-5	0	20	1.46067
sub-5	0	80	0.789945
sub-5	1	20	0.565097
sub-5	1	80	1.16624
sub-7	0	20	3.01336
sub-7	0	80	-1.23646
sub-7	1	20	-2.07208
sub-7	1	80	-0.88844
sub-9	0	20	3.34932
sub-9	0	80	0.204232
sub-9	1	20	-2.05495
sub-9	1	80	-0.680277
