# Supplementary material for: Pupil dilation offers a time-window on prediction error
Source: eLife. 2026 Jan 8;14:RP105287. doi: 10.7554/eLife.105287 (PMC12782557; doi:10.7554/eLife.105287)
Supplement: Figure 2—figure supplement 1—source data 1. [file elife-105287-fig2-figsupp1-data1.xlsx]

## Sheet: panel A
	subject	frequency	0	1	2	3	4	5	6	7	8	9	10	11	12	13	14	15	16	17	18	19	20	21	22	23	24	25	26	27	28	29	30	31	32	33	34	35	36	37	38	39	40	41	42	43	44	45	46
0	102	20	-0.276675	-0.276583	-0.276479	-0.276364	-0.276239	-0.276103	-0.275957	-0.270204	-0.270043	-0.269873	-0.269695	-0.263911	-0.258123	-0.25793	-0.257729	-0.257522	-0.257308	-0.257089	-0.256863	-0.256633	-0.256397	-0.256157	-0.255912	-0.255663	-0.255409	-0.255152	-0.254891	-0.254626	-0.254359	-0.254088	-0.248263	-0.24799	-0.247714	-0.241871	-0.241594	-0.241314	-0.241033	-0.235185	-0.234903	-0.23462	-0.234335	-0.213655	-0.213387	-0.213117	-0.212846	-0.212574	-0.212301
1	102	40	0.0753204	0.0740926	0.0728568	0.0716129	0.0703613	0.069102	0.0732577	0.0719803	0.0706958	0.0694044	0.0681061	0.0668011	0.0654897	0.064172	0.0628482	0.0669729	0.065634	0.0642895	0.0629394	0.0615841	0.0602235	0.0588578	0.0574871	0.0561117	0.0547315	0.0533467	0.0519574	0.0505637	0.0491657	0.0477634	0.046357	0.0449464	0.0435318	0.0475676	0.0461418	0.0501344	0.0486974	0.0472565	0.0458117	0.044363	0.0429104	0.0414538	0.0399933	0.0385288	0.0370602	0.0355876	0.0341109
2	102	80	0.26327	0.258519	0.253786	0.249073	0.244379	0.239706	0.235054	0.230423	0.225813	0.221225	0.21666	0.212118	0.207599	0.203105	0.198634	0.194188	0.189768	0.190714	0.186343	0.181998	0.177681	0.173391	0.16913	0.164898	0.160695	0.156523	0.157734	0.15362	0.149537	0.145486	0.141468	0.137483	0.133531	0.134955	0.131069	0.132556	0.128738	0.124956	0.121211	0.117504	0.113833	0.110201	0.106608	0.103053	0.099538	0.0960625	0.0926271
0	103	20	0.358386	0.356499	0.354599	0.352686	0.350761	0.348824	0.346873	0.344911	0.342935	0.340947	0.337121	0.3363	0.332445	0.330405	0.328352	0.326285	0.324206	0.322114	0.320008	0.317889	0.315757	0.313611	0.311452	0.309279	0.307093	0.304893	0.302679	0.300451	0.298209	0.295954	0.293685	0.291401	0.289104	0.286792	0.284466	0.282127	0.279773	0.277405	0.275023	0.270792	0.268382	0.265959	0.263521	0.26107	0.258605	0.256126	0.253633
1	103	40	-0.173607	-0.173876	-0.172383	-0.170915	-0.169471	-0.168051	-0.168435	-0.167063	-0.165715	-0.164391	-0.164877	-0.165378	-0.164122	-0.16289	-0.16168	-0.160493	-0.159329	-0.158186	-0.157066	-0.155968	-0.154891	-0.153835	-0.152801	-0.151788	-0.150795	-0.149823	-0.148871	-0.147939	-0.147027	-0.146135	-0.145877	-0.145024	-0.144191	-0.143376	-0.142579	-0.141801	-0.141041	-0.140298	-0.139573	-0.138866	-0.138175	-0.137502	-0.136845	-0.136204	-0.13558	-0.134972	-0.13438
2	103	80	-0.20841	-0.207972	-0.209318	-0.20889	-0.208466	-0.208047	-0.207632	-0.207223	-0.206818	-0.206418	-0.207802	-0.20741	-0.207023	-0.206641	-0.206263	-0.205889	-0.207301	-0.206935	-0.206573	-0.206216	-0.207649	-0.207298	-0.206951	-0.206608	-0.206269	-0.205933	-0.2056	-0.205271	-0.203783	-0.203463	-0.203145	-0.202831	-0.202519	-0.20221	-0.201904	-0.2016	-0.201299	-0.202781	-0.202483	-0.20575	-0.205454	-0.206947	-0.206654	-0.206362	-0.206072	-0.207564	-0.207275
0	104	20	-0.427567	-0.426593	-0.42561	-0.424616	-0.423612	-0.422599	-0.421575	-0.42054	-0.419494	-0.418438	-0.415031	-0.412788	-0.410534	-0.409434	-0.408322	-0.407197	-0.406061	-0.404913	-0.403752	-0.402578	-0.401392	-0.400194	-0.398982	-0.396583	-0.395346	-0.394096	-0.392833	-0.391557	-0.390268	-0.388965	-0.387649	-0.385145	-0.383804	-0.381273	-0.379906	-0.378525	-0.37713	-0.375723	-0.373133	-0.371699	-0.370253	-0.368794	-0.367322	-0.365837	-0.364339	-0.362828	-0.361305
1	104	40	0.371894	0.368858	0.365808	0.362744	0.359666	0.356576	0.353472	0.350356	0.347228	0.345273	0.34212	0.338956	0.335781	0.332595	0.329399	0.326192	0.322975	0.319749	0.316513	0.313269	0.310015	0.306753	0.304663	0.301384	0.298098	0.294805	0.291504	0.288196	0.284882	0.284204	0.280873	0.277536	0.274193	0.270845	0.267493	0.264135	0.260773	0.257406	0.254036	0.250661	0.247284	0.243903	0.240519	0.237132	0.233743	0.230352	0.226959
2	104	80	-0.327679	-0.328576	-0.329469	-0.329157	-0.330043	-0.330923	-0.331799	-0.332668	-0.333532	-0.334388	-0.335238	-0.336079	-0.336913	-0.337738	-0.338554	-0.339359	-0.340155	-0.34094	-0.341713	-0.342474	-0.343223	-0.343959	-0.344681	-0.345389	-0.346082	-0.34676	-0.347422	-0.348067	-0.348695	-0.349306	-0.349898	-0.349277	-0.349832	-0.350366	-0.35088	-0.351373	-0.351844	-0.352293	-0.35272	-0.353123	-0.353503	-0.353859	-0.35419	-0.354496	-0.354777	-0.353838	-0.352861
0	105	20	-0.829254	-0.827268	-0.825276	-0.823279	-0.821277	-0.81927	-0.817258	-0.81524	-0.813216	-0.811187	-0.809153	-0.807112	-0.805066	-0.803013	-0.800954	-0.798889	-0.796818	-0.79474	-0.792655	-0.790564	-0.788465	-0.78636	-0.784247	-0.782127	-0.78	-0.777866	-0.775724	-0.773574	-0.771417	-0.769253	-0.76708	-0.7649	-0.762712	-0.760516	-0.758312	-0.756101	-0.753882	-0.751655	-0.74942	-0.747178	-0.744928	-0.742671	-0.740406	-0.738134	-0.735855	-0.733569	-0.731275
1	105	40	-0.34888	-0.347407	-0.345936	-0.344465	-0.342995	-0.341526	-0.340058	-0.338592	-0.337127	-0.335664	-0.334203	-0.332744	-0.331287	-0.329832	-0.32838	-0.326931	-0.325484	-0.324041	-0.3226	-0.321163	-0.319729	-0.318299	-0.316872	-0.315449	-0.31403	-0.312616	-0.311205	-0.309799	-0.308397	-0.307	-0.305608	-0.304221	-0.302838	-0.301461	-0.300089	-0.298722	-0.29736	-0.296004	-0.294654	-0.29331	-0.291971	-0.290638	-0.289311	-0.28799	-0.286675	-0.285366	-0.284063
2	105	80	0.106415	0.106662	0.106913	0.107168	0.107426	0.107687	0.107952	0.108219	0.108488	0.10876	0.109033	0.109307	0.109582	0.109858	0.110134	0.11041	0.110686	0.110961	0.111235	0.111507	0.111777	0.112045	0.112311	0.112573	0.112833	0.113088	0.11334	0.113587	0.113829	0.114066	0.114297	0.114523	0.114742	0.114954	0.115159	0.115357	0.115548	0.11573	0.115903	0.116068	0.116224	0.11637	0.116506	0.116633	0.116748	0.116854	0.116948
0	106	20	0.438606	0.436636	0.434652	0.432654	0.43067	0.428644	0.426605	0.424553	0.422487	0.420409	0.418347	0.416244	0.414129	0.412002	0.409864	0.407715	0.405555	0.403413	0.401261	0.399071	0.396871	0.394663	0.392446	0.390221	0.387988	0.385748	0.383502	0.381249	0.379019	0.376755	0.374515	0.37227	0.369994	0.367715	0.365433	0.36315	0.360866	0.358581	0.356296	0.354011	0.351728	0.349448	0.34717	0.344895	0.342625	0.340359	0.338099
1	106	40	0.202064	0.202792	0.203588	0.204393	0.205237	0.206118	0.207037	0.207994	0.208987	0.210017	0.211082	0.212184	0.21332	0.214492	0.215697	0.216963	0.218234	0.219538	0.220872	0.222237	0.223632	0.225056	0.226508	0.227987	0.229493	0.231024	0.232579	0.234185	0.235786	0.237408	0.23905	0.240712	0.242391	0.244087	0.245799	0.247581	0.249349	0.2511	0.252863	0.254636	0.256445	0.258234	0.26003	0.261831	0.263636	0.265444	0.267254
2	106	80	0.169653	0.172611	0.17561	0.178648	0.181724	0.184835	0.18798	0.191186	0.194395	0.197632	0.200926	0.204217	0.207532	0.210871	0.21423	0.21761	0.221008	0.224423	0.227853	0.231297	0.234754	0.238222	0.241701	0.245187	0.248681	0.252182	0.255686	0.259223	0.262734	0.266245	0.269756	0.273266	0.276773	0.280276	0.283775	0.287295	0.290779	0.294255	0.297722	0.301177	0.30462	0.30805	0.311466	0.314865	0.318248	0.321614	0.32496
0	107	20	0.490001	0.484779	0.479548	0.474307	0.469057	0.4638	0.458536	0.453266	0.459466	0.454177	0.448884	0.443588	0.43829	0.43299	0.42769	0.422388	0.417088	0.411787	0.406488	0.401191	0.395896	0.390603	0.385314	0.380027	0.374744	0.369465	0.36419	0.358919	0.353653	0.348392	0.343136	0.337885	0.332639	0.327398	0.322163	0.316933	0.311709	0.306491	0.301278	0.296071	0.29087	0.285674	0.280484	0.2753	0.270122	0.26495	0.259784
1	107	40	-0.227814	-0.228525	-0.217894	-0.218592	-0.219277	-0.21995	-0.220609	-0.221256	-0.221888	-0.222506	-0.223109	-0.223698	-0.224271	-0.213489	-0.214041	-0.214577	-0.215096	-0.204259	-0.204755	-0.205235	-0.205697	-0.206142	-0.206569	-0.20698	-0.207373	-0.207749	-0.208107	-0.208448	-0.208772	-0.209079	-0.209369	-0.209641	-0.209897	-0.210137	-0.21036	-0.210567	-0.210758	-0.210934	-0.211094	-0.211239	-0.211369	-0.211485	-0.211588	-0.211676	-0.211751	-0.211813	-0.211863
2	107	80	-0.507424	-0.502956	-0.498472	-0.493972	-0.489457	-0.484929	-0.480386	-0.47583	-0.471263	-0.466683	-0.462093	-0.457492	-0.452882	-0.448263	-0.443636	-0.439003	-0.434362	-0.429717	-0.425066	-0.420412	-0.415755	-0.411095	-0.406434	-0.401772	-0.397111	-0.392451	-0.387792	-0.383136	-0.378483	-0.362495	-0.357862	-0.353234	-0.348612	-0.343998	-0.339392	-0.334793	-0.330205	-0.325625	-0.321057	-0.316499	-0.311953	-0.307418	-0.302897	-0.298388	-0.293893	-0.289412	-0.284945
0	108	20	0.264069	0.262639	0.261208	0.259776	0.258342	0.256908	0.255473	0.254038	0.252603	0.251168	0.249733	0.248298	0.246863	0.245428	0.244986	0.244542	0.243104	0.241666	0.240228	0.23879	0.237352	0.235913	0.234475	0.233035	0.231595	0.230154	0.228711	0.227266	0.22582	0.224371	0.222919	0.221464	0.220006	0.218544	0.217077	0.215606	0.214129	0.212648	0.21116	0.209665	0.208164	0.206655	0.205138	0.203613	0.202079	0.200536	0.199975
1	108	40	0.118551	0.118727	0.118906	0.119089	0.119275	0.119465	0.119658	0.119854	0.120054	0.120257	0.120463	0.120672	0.120885	0.1211	0.121318	0.121538	0.121762	0.121987	0.122215	0.122444	0.122675	0.122908	0.123141	0.123375	0.12361	0.123845	0.125072	0.125303	0.125534	0.125764	0.125991	0.126217	0.126439	0.126659	0.126875	0.127087	0.127294	0.127496	0.127692	0.127883	0.128066	0.128242	0.128411	0.128571	0.128723	0.128865	0.128997
2	108	80	0.254891	0.253019	0.251141	0.249259	0.247372	0.246474	0.244577	0.242676	0.240772	0.238865	0.236957	0.235046	0.233135	0.231222	0.229309	0.227396	0.225483	0.223571	0.221659	0.21975	0.217842	0.215937	0.214034	0.212135	0.210239	0.208347	0.20646	0.204577	0.2027	0.200829	0.198963	0.197104	0.195252	0.193407	0.191569	0.18974	0.187919	0.186107	0.184304	0.182511	0.180727	0.178953	0.177191	0.175439	0.173698	0.171969	0.170252
0	109	20	-0.557742	-0.553306	-0.548873	-0.544445	-0.540021	-0.522839	-0.518433	-0.514035	-0.509645	-0.505265	-0.500894	-0.496535	-0.492188	-0.487853	-0.483533	-0.479227	-0.474937	-0.470663	-0.466407	-0.46217	-0.457951	-0.440989	-0.436817	-0.432668	-0.428541	-0.424438	-0.42036	-0.416307	-0.412281	-0.408282	-0.404311	-0.400369	-0.396457	-0.392575	-0.388724	-0.384906	-0.38112	-0.377368	-0.37365	-0.369966	-0.366318	-0.362707	-0.359132	-0.355594	-0.352094	-0.348632	-0.345209
1	109	40	0.0535259	0.0513733	0.0492152	0.0470514	0.0448819	0.0427064	0.040525	0.0383374	0.0361432	0.0339431	0.0317365	0.0295227	0.027303	0.0250767	0.0228437	0.0206039	0.0183572	0.0161034	0.0138431	0.0115759	0.0220286	0.0197425	0.0174492	0.0151495	0.0128431	0.0105301	0.00821052	0.00588455	0.00355194	0.00121353	-0.00113087	-0.00348144	-0.00583727	-0.00819887	-0.0105653	-0.0129367	-0.0153138	-0.0176943	-0.0200789	-0.0224676	-0.0248595	-0.0272545	-0.0168826	-0.0192881	-0.00893155	0.00142408	-0.000996913
2	109	80	-0.295967	-0.294987	-0.294013	-0.293042	-0.292076	-0.291115	-0.290158	-0.289205	-0.288255	-0.28731	-0.286367	-0.285428	-0.284493	-0.28356	-0.282629	-0.281701	-0.280775	-0.279852	-0.27893	-0.278009	-0.277089	-0.276171	-0.275253	-0.274335	-0.260648	-0.259736	-0.258823	-0.245211	-0.244302	-0.243392	-0.24248	-0.241566	-0.240651	-0.239733	-0.226048	-0.22513	-0.224209	-0.223284	-0.222356	-0.221423	-0.220487	-0.219545	-0.218598	-0.217645	-0.216688	-0.215724	-0.202027
0	110	20	1.14234	1.14169	1.14101	1.1403	1.13954	1.13875	1.13793	1.13706	1.13616	1.13522	1.13424	1.13323	1.13217	1.13107	1.12993	1.12874	1.12752	1.12625	1.12494	1.12359	1.12219	1.12074	1.11925	1.11772	1.11614	1.11451	1.11284	1.11111	1.10934	1.10753	1.10566	1.10374	1.10178	1.09976	1.09769	1.09558	1.09341	1.09119	1.08892	1.08659	1.08422	1.08179	1.07931	1.07677	1.07418	1.07154	1.06884
1	110	40	0.729799	0.728331	0.750324	0.748789	0.747232	0.745651	0.744048	0.742424	0.740777	0.739109	0.737419	0.735708	0.733977	0.732225	0.730452	0.72866	0.726848	0.725017	0.723166	0.721296	0.719408	0.717502	0.715577	0.713635	0.711675	0.709698	0.707704	0.705694	0.703667	0.701624	0.699566	0.697492	0.695404	0.6933	0.691182	0.68905	0.686904	0.684745	0.682573	0.680387	0.67819	0.67598	0.673758	0.671524	0.669279	0.667023	0.664756
2	110	80	0.994772	0.993909	0.993029	0.992134	0.991221	0.990291	0.989344	0.98838	0.987398	0.986399	0.985381	0.984344	0.983289	0.982215	0.981122	0.980009	0.978876	0.977723	0.97655	0.975356	0.974141	0.972904	0.971646	0.970366	0.969064	0.96774	0.966392	0.965021	0.963627	0.962209	0.960767	0.9593	0.957808	0.956291	0.954748	0.95318	0.951585	0.949964	0.948316	0.94664	0.944937	0.943206	0.941447	0.939659	0.937842	0.935996	0.93412
0	111	20	0.968828	0.964862	0.960876	0.956868	0.952841	0.948793	0.944728	0.940644	0.936543	0.932425	0.928291	0.924142	0.919978	0.915801	0.91161	0.907406	0.903191	0.898965	0.894727	0.89048	0.886224	0.881959	0.877686	0.873405	0.869118	0.864824	0.860524	0.856219	0.85191	0.847597	0.84328	0.838959	0.834637	0.830312	0.825986	0.821659	0.817331	0.813003	0.808675	0.804348	0.800022	0.795698	0.791376	0.787057	0.782739	0.778425	0.774114
1	111	40	1.13421	1.12974	1.12526	1.12075	1.11622	1.11168	1.10711	1.10253	1.09793	1.09331	1.08868	1.08403	1.07936	1.07468	1.06998	1.06527	1.06055	1.05581	1.05106	1.0463	1.04153	1.03674	1.03195	1.02715	1.02233	1.01752	1.01269	1.00786	1.00302	0.99818	0.993335	0.988487	0.983636	0.978785	0.973932	0.969079	0.964227	0.959376	0.954528	0.949683	0.944842	0.940005	0.935174	0.930348	0.925529	0.920717	0.915912
2	111	80	1.2075	1.20339	1.19931	1.19525	1.19122	1.1872	1.1832	1.17923	1.17528	1.17134	1.16743	1.16353	1.15966	1.1558	1.15196	1.14814	1.14433	1.14055	1.13678	1.13303	1.12929	1.12557	1.12186	1.11817	1.1145	1.11084	1.10719	1.10356	1.09994	1.09633	1.09274	1.08916	1.08559	1.08203	1.07848	1.07495	1.07143	1.06791	1.06441	1.06091	1.05743	1.05396	1.05049	1.04703	1.04358	1.04014	1.03671
0	112	20	-0.487196	-0.474398	-0.473988	-0.47359	-0.473204	-0.46046	-0.460105	-0.447378	-0.434669	-0.434363	-0.434071	-0.433791	-0.433523	-0.433267	-0.433023	-0.432791	-0.432571	-0.432362	-0.432165	-0.431979	-0.431803	-0.431638	-0.431483	-0.431337	-0.431201	-0.431073	-0.430954	-0.430844	-0.43074	-0.430644	-0.430555	-0.430472	-0.430394	-0.430321	-0.430253	-0.430189	-0.430128	-0.43007	-0.430014	-0.42996	-0.429907	-0.429854	-0.429801	-0.429748	-0.429693	-0.429636	-0.429577
1	112	40	-0.301249	-0.3	-0.298761	-0.297531	-0.296311	-0.2951	-0.2939	-0.29271	-0.29153	-0.290361	-0.289203	-0.288056	-0.28692	-0.285796	-0.272178	-0.271083	-0.270001	-0.26893	-0.267872	-0.266826	-0.25325	-0.252235	-0.251233	-0.250243	-0.249266	-0.248302	-0.24735	-0.246412	-0.232944	-0.232037	-0.231143	-0.217735	-0.216872	-0.216022	-0.215184	-0.214359	-0.213546	-0.212745	-0.211957	-0.21118	-0.210415	-0.209662	-0.20892	-0.20819	-0.20747	-0.206762	-0.206064
2	112	80	-0.577086	-0.576982	-0.576839	-0.564308	-0.564093	-0.563841	-0.56355	-0.563223	-0.562858	-0.562456	-0.549652	-0.549184	-0.548681	-0.548143	-0.547571	-0.546964	-0.546325	-0.545652	-0.544946	-0.544209	-0.54344	-0.530274	-0.52945	-0.528596	-0.527713	-0.526801	-0.525862	-0.524894	-0.5239	-0.522879	-0.521833	-0.520761	-0.519664	-0.518544	-0.5174	-0.516232	-0.515043	-0.513832	-0.512599	-0.511346	-0.510073	-0.50878	-0.507468	-0.506138	-0.50479	-0.503425	-0.502043
0	113	20	-0.00799561	-0.00985865	-0.0116933	-0.0134996	-0.0152774	-0.0170268	-0.0187476	-0.02044	-0.0221038	-0.0237391	-0.025346	-0.0269244	-0.0284745	-0.0299962	-0.0314897	-0.032955	-0.0343922	-0.0358015	-0.0371829	-0.0385366	-0.0398627	-0.0411613	-0.0424326	-0.0436768	-0.0448941	-0.0460846	-0.0472486	-0.0483862	-0.0494977	-0.0505833	-0.0516433	-0.0526779	-0.0536874	-0.0546568	-0.0556169	-0.0565528	-0.0574648	-0.0583531	-0.0592182	-0.0600602	-0.0608797	-0.0616769	-0.0624522	-0.0632059	-0.0639385	-0.0646503	-0.0653417
1	113	40	-0.122012	-0.119956	-0.117934	-0.115946	-0.113992	-0.112073	-0.110189	-0.108341	-0.106527	-0.10475	-0.103009	-0.101304	-0.099635	-0.0980032	-0.0964083	-0.0948354	-0.0933148	-0.0918317	-0.090386	-0.0889779	-0.0876076	-0.086275	-0.0849802	-0.0837233	-0.0825042	-0.081323	-0.0801797	-0.0790742	-0.0780064	-0.0769612	-0.0759688	-0.0750138	-0.0740962	-0.0732158	-0.0723724	-0.0715658	-0.0707959	-0.0700624	-0.0693651	-0.0687037	-0.0680779	-0.0674876	-0.0669323	-0.0664117	-0.0659256	-0.0654735	-0.0650551
2	113	80	0.300893	0.299469	0.298027	0.296566	0.295087	0.29359	0.292075	0.290542	0.288991	0.287422	0.300857	0.299243	0.297612	0.295963	0.294297	0.292614	0.290914	0.289196	0.287462	0.285727	0.28396	0.282177	0.280378	0.278578	0.276748	0.274903	0.273043	0.271169	0.26928	0.267377	0.265461	0.263531	0.261588	0.259633	0.257666	0.255686	0.253695	0.251694	0.249681	0.247658	0.245625	0.258798	0.256737	0.254667	0.252589	0.250504	0.24841
0	114	20	0.103577	0.101625	0.0996774	0.0977332	0.0957928	0.093856	0.091923	0.0899937	0.0880682	0.0861465	0.0842285	0.0823142	0.0804035	0.0784965	0.076593	0.074693	0.0727964	0.0709031	0.069013	0.0671261	0.065242	0.0633608	0.0614823	0.0596063	0.0577327	0.0558612	0.0539916	0.0521239	0.0502576	0.0483927	0.0465288	0.0446701	0.0428076	0.0409454	0.0390831	0.0372207	0.0353576	0.0334938	0.0316288	0.0297623	0.0278987	0.0260285	0.0241559	0.0222808	0.0204027	0.0185215	0.0166367
1	114	40	0.248997	0.247678	0.246345	0.244999	0.243639	0.242266	0.24088	0.239486	0.238076	0.236658	0.235224	0.23378	0.232324	0.230859	0.229384	0.227899	0.226406	0.224904	0.223393	0.221876	0.220351	0.21882	0.217282	0.215739	0.21419	0.212642	0.211085	0.209524	0.20796	0.206393	0.204825	0.203255	0.224186	0.222595	0.221005	0.219415	0.217827	0.21624	0.214656	0.213074	0.211496	0.209921	0.208351	0.206786	0.205226	0.203672	0.202125
2	114	80	0.171887	0.168978	0.166053	0.163119	0.160166	0.157199	0.15422	0.151229	0.148227	0.145213	0.142189	0.139156	0.136114	0.133064	0.130005	0.12694	0.123868	0.12079	0.117707	0.114619	0.111527	0.108436	0.105337	0.102236	0.0991327	0.096028	0.0929224	0.0898164	0.0867106	0.0836053	0.0805011	0.0773985	0.0742979	0.0711999	0.0681048	0.0650131	0.0619254	0.0588419	0.0557633	0.0526898	0.049622	0.0465603	0.0435051	0.0404568	0.0374159	0.0343828	0.0313579
0	115	20	0.129662	0.128897	0.128114	0.127312	0.126492	0.125655	0.124802	0.123933	0.123048	0.122149	0.121236	0.120308	0.119368	0.118415	0.117449	0.116473	0.115485	0.114486	0.113478	0.112459	0.111432	0.110396	0.109352	0.108299	0.10724	0.106173	0.1051	0.104021	0.102935	0.101845	0.100749	0.099648	0.0985429	0.0974336	0.0963205	0.0952038	0.0940838	0.0929608	0.091835	0.0907066	0.0895759	0.0884431	0.0873084	0.0861719	0.0850339	0.0838946	0.0827539
1	115	40	0.0146602	0.0171512	0.0196478	0.0221496	0.0246561	0.0271668	0.0296811	0.0321987	0.0347189	0.0372413	0.0397651	0.0422899	0.044815	0.0473399	0.0498638	0.0523862	0.0549065	0.0574239	0.0599378	0.0624474	0.0649522	0.0674514	0.0699442	0.07243	0.074908	0.0773774	0.0798376	0.0822877	0.0854833	0.0879106	0.0910864	0.0934877	0.0966316	0.0990039	0.101361	0.103701	0.106024	0.108329	0.110616	0.112883	0.115129	0.117354	0.119558	0.121738	0.123894	0.126784	0.12889
2	115	80	0.27573	0.27128	0.266812	0.262325	0.257822	0.253303	0.248769	0.24422	0.239658	0.235084	0.230499	0.225902	0.221296	0.216681	0.212058	0.207428	0.202792	0.19815	0.194271	0.18962	0.184966	0.18031	0.175652	0.170993	0.166334	0.161676	0.15702	0.152365	0.147713	0.143065	0.13842	0.13378	0.129912	0.125282	0.12066	0.116044	0.111436	0.106836	0.102245	0.0976625	0.0930901	0.0885279	0.0839763	0.079436	0.0749072	0.0703905	0.0658863
0	116	20	-0.153126	-0.151308	-0.147189	-0.14541	-0.143651	-0.139592	-0.137873	-0.136176	-0.134498	-0.130526	-0.128891	-0.127278	-0.125686	-0.121789	-0.120242	-0.118716	-0.117213	-0.115732	-0.111961	-0.108214	-0.106803	-0.105415	-0.10405	-0.102707	-0.101389	-0.100093	-0.0988209	-0.0975722	-0.096347	-0.0951454	-0.0939675	-0.0928132	-0.0916826	-0.0882551	-0.0871728	-0.0861141	-0.0850791	-0.0817557	-0.0807688	-0.0798054	-0.0788653	-0.0779486	-0.0770551	-0.0761846	-0.0753371	-0.0735693	-0.0727687
1	116	40	0.154045	0.155345	0.154329	0.15331	0.152289	0.151265	0.150239	0.14921	0.148178	0.147144	0.146107	0.145067	0.144024	0.142979	0.14193	0.140879	0.139825	0.138769	0.137709	0.136647	0.135582	0.134514	0.133443	0.13237	0.13361	0.132531	0.131449	0.130365	0.129278	0.128189	0.127098	0.126005	0.124909	0.123812	0.125039	0.123937	0.122833	0.121728	0.120621	0.119513	0.118404	0.117293	0.116181	0.115069	0.113956	0.112841	0.111727
2	116	80	0.117639	0.115382	0.113122	0.11086	0.108595	0.106329	0.104061	0.101793	0.0995237	0.0972546	0.0949857	0.0927176	0.0904506	0.088185	0.0859214	0.0859721	0.0837126	0.0814561	0.079203	0.0769538	0.0770208	0.0747793	0.0725428	0.0703115	0.0680857	0.0658659	0.0636523	0.0614452	0.059245	0.057052	0.0548664	0.0526885	0.0505186	0.0493019	0.0471473	0.0473134	0.0451755	0.0430468	0.0409276	0.038818	0.0367183	0.0346285	0.032549	0.0304798	0.0284211	0.0263731	0.0243358
0	117	20	0.129453	0.128196	0.126936	0.125673	0.124405	0.123135	0.121862	0.120586	0.119308	0.118027	0.116744	0.115459	0.114173	0.112885	0.111595	0.110305	0.109013	0.107722	0.10643	0.105138	0.103847	0.102557	0.101267	0.0999797	0.0986937	0.0974098	0.0961284	0.0948498	0.0935745	0.0923028	0.0910351	0.0897714	0.088513	0.0872598	0.0860123	0.0847705	0.0835357	0.082308	0.0810873	0.079875	0.0786711	0.0774762	0.0762907	0.075115	0.0746121	0.0734563	0.0723116
1	117	40	0.509557	0.508585	0.507621	0.506665	0.505717	0.504776	0.503844	0.502919	0.502002	0.501092	0.500189	0.499293	0.498404	0.497522	0.496646	0.495777	0.494913	0.494054	0.493202	0.492354	0.491511	0.490672	0.489837	0.489006	0.488178	0.487353	0.48653	0.485709	0.48489	0.484072	0.483254	0.482437	0.481619	0.4808	0.47998	0.479157	0.478332	0.477504	0.476673	0.475837	0.474996	0.474149	0.473297	0.472438	0.471572	0.470698	0.469816
2	117	80	-0.378567	-0.377349	-0.376129	-0.374908	-0.373687	-0.372464	-0.371241	-0.370018	-0.368795	-0.367573	-0.366352	-0.365131	-0.363912	-0.362695	-0.361479	-0.360266	-0.359055	-0.357846	-0.35664	-0.355437	-0.354237	-0.35304	-0.351847	-0.350657	-0.349471	-0.348289	-0.34711	-0.345936	-0.344766	-0.3436	-0.342439	-0.341282	-0.339475	-0.338328	-0.337186	-0.336049	-0.334916	-0.333788	-0.332664	-0.331546	-0.330432	-0.329322	-0.328217	-0.327117	-0.326022	-0.324931	-0.323844
0	118	20	0.0432218	0.0429622	0.0426767	0.0423657	0.0420272	0.0416618	0.0412691	0.0408488	0.0404006	0.0399242	0.0394193	0.0388857	0.038323	0.0377311	0.0371096	0.0364584	0.0357772	0.0350659	0.0343241	0.0335519	0.0327489	0.0319151	0.0310503	0.0301544	0.0292273	0.0282689	0.0272801	0.026259	0.0252066	0.0241228	0.0230076	0.0218612	0.0206835	0.0194746	0.0182348	0.0169641	0.0156626	0.0143307	0.0129684	0.0115761	0.010154	0.00870245	0.0072217	0.00571212	0.00417407	0.00260796	0.0010142
1	118	40	-0.899178	-0.900957	-0.902726	-0.874948	-0.876708	-0.878455	-0.880189	-0.881909	-0.883614	-0.885305	-0.88698	-0.888639	-0.89028	-0.891904	-0.893509	-0.895095	-0.896662	-0.898208	-0.899733	-0.901236	-0.902717	-0.904175	-0.905609	-0.90702	-0.908405	-0.909766	-0.9111	-0.912408	-0.913688	-0.914941	-0.916166	-0.917363	-0.91853	-0.919668	-0.920776	-0.921853	-0.922899	-0.923913	-0.924896	-0.925846	-0.926764	-0.927648	-0.928499	-0.899853	-0.90065	-0.901411	-0.902138
2	118	80	-0.646512	-0.646802	-0.64705	-0.647258	-0.647424	-0.647549	-0.647633	-0.647676	-0.647678	-0.647641	-0.647562	-0.647444	-0.647286	-0.647088	-0.646851	-0.646575	-0.64626	-0.645907	-0.645515	-0.645086	-0.64462	-0.644117	-0.643577	-0.643002	-0.642391	-0.641745	-0.641065	-0.640351	-0.639603	-0.638823	-0.608475	-0.607644	-0.606783	-0.605891	-0.604969	-0.604018	-0.603039	-0.602031	-0.600996	-0.599935	-0.598847	-0.597734	-0.596597	-0.595435	-0.59425	-0.593042	-0.591812
0	119	20	-0.0485419	-0.0507021	-0.0528644	-0.055028	-0.058751	-0.0609139	-0.0630758	-0.0652359	-0.0673931	-0.0695468	-0.0716959	-0.0738395	-0.0759767	-0.0781065	-0.0802279	-0.08234	-0.0844416	-0.0865319	-0.0886096	-0.0906739	-0.0942795	-0.0963125	-0.0983287	-0.100327	-0.103862	-0.10582	-0.107758	-0.109673	-0.111565	-0.113433	-0.115275	-0.11865	-0.120437	-0.122196	-0.123925	-0.127179	-0.128845	-0.130479	-0.132079	-0.133645	-0.136731	-0.138225	-0.139681	-0.1411	-0.142481	-0.143822	-0.146682
1	119	40	0.264813	0.266589	0.268389	0.270212	0.272057	0.273923	0.275809	0.277714	0.279638	0.281579	0.283536	0.285508	0.287494	0.289492	0.291502	0.293521	0.29555	0.297585	0.299627	0.301673	0.303722	0.305773	0.307825	0.309875	0.311922	0.31239	0.314428	0.316458	0.318479	0.326649	0.328641	0.336777	0.338732	0.340669	0.342588	0.344486	0.346362	0.348214	0.35004	0.35184	0.35361	0.35535	0.357059	0.358733	0.366515	0.368111	0.369668
2	119	80	-0.478594	-0.469415	-0.466475	-0.463517	-0.460541	-0.457548	-0.456133	-0.453106	-0.451662	-0.448603	-0.447127	-0.444037	-0.440932	-0.431592	-0.428467	-0.425328	-0.422177	-0.419013	-0.415837	-0.412649	-0.409449	-0.406239	-0.403017	-0.399784	-0.390292	-0.380797	-0.377549	-0.374292	-0.371026	-0.367751	-0.364468	-0.361177	-0.357879	-0.348323	-0.346616	-0.343302	-0.339982	-0.336656	-0.333323	-0.329985	-0.326642	-0.323294	-0.319941	-0.316584	-0.313222	-0.311455	-0.308085
0	120	20	0.557312	0.55481	0.552301	0.549786	0.547267	0.544741	0.54221	0.539677	0.537137	0.534591	0.532042	0.529489	0.526932	0.524372	0.521809	0.519244	0.516675	0.514107	0.511534	0.508961	0.506389	0.503812	0.501235	0.498658	0.49608	0.493503	0.490925	0.488348	0.485772	0.483196	0.480622	0.478051	0.475479	0.472909	0.470342	0.467776	0.465213	0.462652	0.460093	0.457537	0.454983	0.452432	0.449885	0.44734	0.444798	0.442259	0.439724
1	120	40	0.26489	0.262149	0.259429	0.256729	0.254052	0.251393	0.248754	0.246136	0.243538	0.24096	0.238402	0.235863	0.233345	0.230846	0.228367	0.225907	0.223466	0.221046	0.218644	0.216262	0.2139	0.211556	0.209232	0.206926	0.204639	0.202372	0.200123	0.197894	0.195683	0.193491	0.191318	0.189164	0.187029	0.184912	0.182815	0.180736	0.178675	0.176634	0.174611	0.172607	0.170624	0.168657	0.166709	0.164779	0.162868	0.160975	0.1591
2	120	80	-0.271676	-0.269973	-0.268304	-0.266667	-0.265065	-0.263496	-0.261959	-0.260454	-0.258981	-0.257539	-0.256128	-0.254748	-0.253398	-0.252077	-0.250786	-0.233987	-0.23277	-0.231582	-0.230419	-0.229285	-0.228177	-0.227094	-0.226037	-0.225004	-0.223995	-0.22301	-0.222047	-0.221107	-0.220188	-0.219291	-0.218411	-0.217553	-0.216714	-0.215893	-0.215088	-0.214301	-0.213529	-0.212772	-0.212029	-0.2113	-0.210583	-0.209879	-0.209185	-0.208501	-0.207827	-0.207161	-0.206502
0	122	20	0.380688	0.378904	0.376924	0.375181	0.373459	0.371756	0.370072	0.368406	0.366759	0.365129	0.363517	0.361922	0.360343	0.358562	0.357015	0.355263	0.353746	0.352242	0.350752	0.349275	0.347811	0.346358	0.344917	0.343488	0.341849	0.34044	0.339041	0.33765	0.336268	0.334894	0.333527	0.332167	0.330595	0.329247	0.327905	0.326568	0.325235	0.323905	0.322579	0.321256	0.319934	0.318614	0.317296	0.315978	0.314659	0.313341	0.312021
1	122	40	0.727732	0.725817	0.723902	0.721549	0.719633	0.717499	0.715583	0.713668	0.711754	0.709839	0.707926	0.706014	0.704102	0.702192	0.700283	0.698376	0.696471	0.694568	0.692667	0.690768	0.688871	0.686978	0.685087	0.683199	0.681314	0.679433	0.677336	0.675243	0.673373	0.671506	0.669643	0.667784	0.665929	0.66386	0.662014	0.660171	0.658334	0.6565	0.65467	0.652845	0.650806	0.64899	0.647177	0.645369	0.643564	0.641764	0.639967
2	122	80	0.0521979	0.0510371	0.0496802	0.0485692	0.0474832	0.0464221	0.0453861	0.0441537	0.0431679	0.0422072	0.0412715	0.0403608	0.0394751	0.0386142	0.037778	0.0369665	0.0361795	0.0354169	0.0346785	0.0339642	0.0332737	0.0326069	0.0319634	0.0313431	0.0307457	0.030171	0.0296185	0.0290881	0.0285793	0.0280919	0.0276254	0.0271795	0.0267538	0.0263478	0.0259612	0.0255935	0.0252442	0.0249128	0.0245989	0.0243019	0.0240213	0.0237566	0.0235073	0.0232727	0.0230524	0.0228457	0.022652
0	123	20	-0.229596	-0.229322	-0.227063	-0.226814	-0.226544	-0.226319	-0.226106	-0.225903	-0.225711	-0.22553	-0.225359	-0.225197	-0.225046	-0.224903	-0.22477	-0.224646	-0.224529	-0.224421	-0.224321	-0.224228	-0.224142	-0.224029	-0.223956	-0.22389	-0.223828	-0.223773	-0.223722	-0.223675	-0.223633	-0.223595	-0.223559	-0.223527	-0.223498	-0.223471	-0.223445	-0.223421	-0.223398	-0.223375	-0.223353	-0.22333	-0.223307	-0.223282	-0.223256	-0.223228	-0.223164	-0.223131	-0.223095
1	123	40	-0.453294	-0.450811	-0.448353	-0.44592	-0.443511	-0.441126	-0.438764	-0.436425	-0.434109	-0.431815	-0.429542	-0.427291	-0.425028	-0.422784	-0.420595	-0.418425	-0.416275	-0.414143	-0.41203	-0.409935	-0.407857	-0.405796	-0.403753	-0.401726	-0.399681	-0.397651	-0.395671	-0.393706	-0.391755	-0.389818	-0.387895	-0.385986	-0.384089	-0.382205	-0.380334	-0.378474	-0.376627	-0.37479	-0.372965	-0.37115	-0.369346	-0.367518	-0.365734	-0.363959	-0.362194	-0.360404	-0.358656
2	123	80	-0.201933	-0.202646	-0.203373	-0.204114	-0.204868	-0.205635	-0.206415	-0.207208	-0.208014	-0.208832	-0.209663	-0.210505	-0.211359	-0.212224	-0.211103	-0.211958	-0.212857	-0.213734	-0.214654	-0.215551	-0.216491	-0.215421	-0.21638	-0.217349	-0.218327	-0.219313	-0.220307	-0.221309	-0.222285	-0.223268	-0.224292	-0.225323	-0.226361	-0.227405	-0.228454	-0.22951	-0.230537	-0.231602	-0.232673	-0.233748	-0.234827	-0.235911	-0.236964	-0.238054	-0.239147	-0.240243	-0.241341
0	124	20	0.59183	0.594597	0.597315	0.599983	0.602599	0.605164	0.607675	0.610132	0.612534	0.61488	0.617168	0.619397	0.621567	0.623676	0.625724	0.629512	0.63143	0.633283	0.635069	0.636788	0.638439	0.64002	0.64153	0.642968	0.644334	0.645625	0.646842	0.647982	0.649046	0.650031	0.650937	0.651763	0.652508	0.653171	0.653751	0.654247	0.654658	0.654983	0.655223	0.655374	0.655438	0.655413	0.655299	0.655095	0.654799	0.654412	0.653934
1	124	40	-0.450399	-0.448509	-0.446626	-0.444748	-0.442878	-0.441015	-0.43916	-0.437312	-0.435471	-0.433639	-0.431816	-0.43	-0.428193	-0.426395	-0.424606	-0.422825	-0.421053	-0.41929	-0.417535	-0.415789	-0.414052	-0.412324	-0.410604	-0.408893	-0.407189	-0.405494	-0.403807	-0.402127	-0.400455	-0.39879	-0.397132	-0.39548	-0.393835	-0.392196	-0.390562	-0.388934	-0.38731	-0.385691	-0.384076	-0.382465	-0.380856	-0.379251	-0.377648	-0.376046	-0.374446	-0.372846	-0.371247
2	124	80	-0.368831	-0.367883	-0.366925	-0.365957	-0.36498	-0.363993	-0.362996	-0.361988	-0.360971	-0.358002	-0.35504	-0.353996	-0.352941	-0.351875	-0.350799	-0.349711	-0.348613	-0.347503	-0.346383	-0.345253	-0.344111	-0.342959	-0.341797	-0.340624	-0.339441	-0.338248	-0.337046	-0.335834	-0.334613	-0.333382	-0.332143	-0.330896	-0.329641	-0.328378	-0.327107	-0.32583	-0.324546	-0.323255	-0.321959	-0.320658	-0.319352	-0.318041	-0.316727	-0.315409	-0.314088	-0.310838	-0.309516
0	125	20	0.0851566	0.0856262	0.0860595	0.0864558	0.0868144	0.0871347	0.0874161	0.0876579	0.0878595	0.0880204	0.0881398	0.0882173	0.0882522	0.088244	0.0881922	0.0880963	0.0879557	0.0877699	0.0875386	0.0872612	0.0869374	0.0865668	0.086149	0.0856836	0.0851704	0.084609	0.0839993	0.083341	0.0826338	0.0818777	0.0810725	0.080218	0.0793143	0.0783613	0.0891491	0.0880927	0.0869872	0.0858326	0.0846289	0.0833765	0.0820755	0.0807262	0.0793288	0.0778836	0.0763911	0.0748515	0.0732654
1	125	40	0.080538	0.0818794	0.0832174	0.0845514	0.085881	0.0872056	0.0885246	0.0898374	0.0911436	0.0924426	0.0937337	0.106878	0.108147	0.109406	0.110656	0.111894	0.113121	0.114336	0.115538	0.116727	0.117903	0.119064	0.12021	0.12134	0.122454	0.123551	0.124631	0.125693	0.126736	0.12776	0.141029	0.142007	0.142964	0.1439	0.144814	0.145705	0.146573	0.147418	0.148239	0.149035	0.149806	0.150552	0.151273	0.151967	0.152634	0.153275	0.153888
2	125	80	-0.333501	-0.327333	-0.321216	-0.315152	-0.309142	-0.303187	-0.297287	-0.291444	-0.285658	-0.279932	-0.274265	-0.268659	-0.251102	-0.245625	-0.240211	-0.23486	-0.229575	-0.224355	-0.219202	-0.214116	-0.209097	-0.204147	-0.199266	-0.194455	-0.189714	-0.185044	-0.180444	-0.175917	-0.171462	-0.167079	-0.162769	-0.158532	-0.154369	-0.150279	-0.146263	-0.142321	-0.138454	-0.13466	-0.130941	-0.127296	-0.123726	-0.107826	-0.104409	-0.101067	-0.0977979	-0.0946027	-0.0914808
0	126	20	0.857484	0.852513	0.847533	0.842544	0.837546	0.832541	0.827528	0.822508	0.81748	0.812447	0.807407	0.802361	0.79731	0.792254	0.787193	0.782128	0.777059	0.771986	0.76691	0.761831	0.756749	0.751665	0.746579	0.741492	0.736403	0.731313	0.726222	0.72113	0.716038	0.710946	0.705854	0.700762	0.69567	0.690579	0.685489	0.680399	0.675311	0.670224	0.665137	0.660052	0.654969	0.649886	0.644805	0.639725	0.634647	0.62957	0.624495
1	126	40	0.301892	0.300853	0.299813	0.29877	0.297725	0.296677	0.295627	0.294574	0.293518	0.292458	0.291395	0.290328	0.289257	0.288182	0.287103	0.286019	0.284931	0.283838	0.282739	0.281635	0.280526	0.299508	0.298369	0.297225	0.296075	0.294918	0.293754	0.292584	0.291406	0.290221	0.289028	0.287828	0.28662	0.285404	0.28418	0.282947	0.281706	0.280456	0.279197	0.277929	0.276651	0.275364	0.274068	0.272761	0.271445	0.270118	0.268781
2	126	80	0.445562	0.443227	0.4409	0.43858	0.436267	0.433961	0.431661	0.429368	0.427082	0.424802	0.422528	0.42026	0.417998	0.415742	0.413491	0.411245	0.409004	0.406768	0.404536	0.402309	0.400085	0.397865	0.395649	0.393436	0.391225	0.389017	0.406992	0.404771	0.402551	0.400333	0.398115	0.395898	0.393681	0.391464	0.389246	0.387027	0.384806	0.382584	0.380359	0.378132	0.375901	0.373667	0.371429	0.369186	0.366939	0.364687	0.362429
0	127	20	0.233505	0.233679	0.233852	0.234024	0.234195	0.234365	0.234535	0.234704	0.234873	0.235042	0.235212	0.235382	0.235553	0.235724	0.235897	0.236071	0.236246	0.236423	0.236602	0.236935	0.237117	0.237301	0.237488	0.237677	0.237868	0.238062	0.238259	0.238459	0.238661	0.238866	0.239074	0.239285	0.239499	0.239716	0.239935	0.240158	0.240383	0.24061	0.240841	0.241073	0.241308	0.241546	0.241785	0.242026	0.242269	0.242513	0.242759
1	127	40	0.33611	0.336223	0.336309	0.336369	0.336402	0.336406	0.336383	0.336332	0.336252	0.336144	0.336159	0.335992	0.335796	0.335571	0.335316	0.335031	0.334716	0.334371	0.333996	0.333591	0.333155	0.332689	0.332193	0.331666	0.331109	0.330522	0.329904	0.329257	0.328579	0.327871	0.327134	0.326366	0.325568	0.324742	0.323886	0.323001	0.322087	0.321143	0.320172	0.319172	0.318144	0.317088	0.316005	0.314894	0.313756	0.312592	0.311401
2	127	80	0.521795	0.521554	0.5213	0.521036	0.520759	0.52047	0.52017	0.519856	0.51953	0.519191	0.518839	0.518473	0.518094	0.517701	0.517293	0.516871	0.516435	0.515984	0.515517	0.515036	0.514538	0.514025	0.513495	0.512949	0.512386	0.511807	0.51121	0.510595	0.509962	0.509311	0.508642	0.507954	0.507247	0.506521	0.505775	0.505009	0.504223	0.503417	0.502589	0.501741	0.500871	0.49998	0.499066	0.49813	0.497172	0.496191	0.495186
0	128	20	0.583004	0.582098	0.589926	0.588962	0.587971	0.586954	0.58591	0.584839	0.58374	0.582614	0.581465	0.580283	0.579073	0.577834	0.576567	0.575271	0.573947	0.572594	0.571212	0.569806	0.57712	0.575646	0.574142	0.572609	0.571047	0.569456	0.567835	0.566186	0.573203	0.57149	0.569749	0.567978	0.566178	0.56435	0.562494	0.560609	0.558696	0.556755	0.554786	0.552795	0.550771	0.548726	0.546648	0.544544	0.542413	0.549016	0.546828
1	128	40	0.368897	0.367297	0.365653	0.363969	0.362234	0.360454	0.35863	0.356761	0.354848	0.352891	0.35089	0.348845	0.346757	0.344626	0.342452	0.340236	0.337976	0.335675	0.333331	0.330951	0.337279	0.334805	0.33229	0.329734	0.327137	0.3245	0.321823	0.319106	0.316348	0.322306	0.319465	0.316585	0.313666	0.310715	0.307719	0.313474	0.310398	0.307284	0.304133	0.300944	0.29772	0.294459	0.291161	0.287829	0.28446	0.281057	0.277618
2	128	80	-0.087327	-0.0911528	-0.0862451	-0.0901057	-0.0939746	-0.0978513	-0.0930387	-0.0881457	-0.0920532	-0.0959665	-0.0998851	-0.103808	-0.107736	-0.111667	-0.115601	-0.119537	-0.123469	-0.127409	-0.131349	-0.135289	-0.130461	-0.125708	-0.12965	-0.124806	-0.128753	-0.132696	-0.136636	-0.14057	-0.13573	-0.130904	-0.13483	-0.12998	-0.133895	-0.137801	-0.133002	-0.136893	-0.140774	-0.144643	-0.148499	-0.152343	-0.156172	-0.159988	-0.163788	-0.167572	-0.17134	-0.175091	-0.178823
0	129	20	0.145966	0.145358	0.144748	0.144138	0.143526	0.142913	0.142299	0.141682	0.141064	0.140443	0.139819	0.139193	0.138564	0.137932	0.137296	0.136657	0.136013	0.135366	0.134714	0.134058	0.133397	0.132731	0.132059	0.131383	0.1307	0.130012	0.129318	0.128617	0.127911	0.127197	0.126477	0.12575	0.125016	0.124275	0.123526	0.12277	0.122007	0.121236	0.120457	0.11967	0.118876	0.118075	0.117265	0.116447	0.115622	0.114789	0.113948
1	129	40	-0.0835535	-0.0846966	-0.0858221	-0.0869297	-0.0880192	-0.0890905	-0.0901434	-0.0911778	-0.0921935	-0.0931903	-0.0941681	-0.0951269	-0.0960664	-0.0969866	-0.0978873	-0.0987685	-0.0996301	-0.100472	-0.101294	-0.102097	-0.102879	-0.103642	-0.104384	-0.105107	-0.105809	-0.106492	-0.107154	-0.107797	-0.108419	-0.109022	-0.109604	-0.110167	-0.110709	-0.111232	-0.111735	-0.112217	-0.112681	-0.113124	-0.113548	-0.113952	-0.114337	-0.114703	-0.115049	-0.115376	-0.115684	-0.115972	-0.116242
2	129	80	0.104601	0.106213	0.107775	0.109289	0.110753	0.112167	0.113531	0.114846	0.11611	0.117324	0.118489	0.119602	0.120666	0.121679	0.122643	0.123556	0.124419	0.125232	0.125996	0.12671	0.127375	0.12799	0.128557	0.129075	0.129545	0.129966	0.130341	0.130668	0.130948	0.131182	0.13137	0.131512	0.13161	0.131663	0.131673	0.131639	0.131563	0.131445	0.131286	0.131086	0.130846	0.130567	0.130249	0.129894	0.129501	0.129073	0.128609
0	130	20	0.0273307	0.0262277	0.0251259	0.0240254	0.0229266	0.0218296	0.0207345	0.0196416	0.0185511	0.0174631	0.0163779	0.0152955	0.0142162	0.0131401	0.0120675	0.0109983	0.0099329	0.00887133	0.00781377	0.00676034	0.0057112	0.00466648	0.0036263	0.00259078	0.00156006	0.000534228	-0.000486589	-0.00150229	-0.00251278	-0.00351796	-0.00451774	-0.00551204	-0.00650078	-0.00748389	-0.0084613	-0.00943296	-0.0103988	-0.0113588	-0.0123128	-0.013261	-0.0142031	-0.0151393	-0.0160694	-0.0169935	-0.0179116	-0.0188236	-0.0197295
1	130	40	0.0471944	0.0482648	0.04932	0.0503599	0.0513845	0.0523936	0.0533873	0.0543653	0.0553277	0.0562743	0.0572051	0.05812	0.059019	0.0599018	0.0607685	0.0616189	0.062453	0.0837477	0.0845265	0.0852888	0.0860343	0.0867632	0.0874751	0.0881702	0.0888482	0.0895091	0.0901528	0.0907792	0.0913883	0.0919799	0.0925541	0.0931106	0.0936495	0.0941707	0.094674	0.0951596	0.0956272	0.0960768	0.0965084	0.0969219	0.0973173	0.0976945	0.0980535	0.0983942	0.0987167	0.0990208	0.0993066
2	130	80	-0.448445	-0.445787	-0.443145	-0.440519	-0.437908	-0.435312	-0.43273	-0.430163	-0.427609	-0.425069	-0.422543	-0.420029	-0.417528	-0.415039	-0.412563	-0.410098	-0.407644	-0.405201	-0.40277	-0.400348	-0.397937	-0.395536	-0.393144	-0.390762	-0.388389	-0.386024	-0.383668	-0.381321	-0.378981	-0.37665	-0.374326	-0.372009	-0.3697	-0.367397	-0.365102	-0.362813	-0.36053	-0.358254	-0.355984	-0.35372	-0.351462	-0.34921	-0.346964	-0.344723	-0.342487	-0.340258	-0.338033
0	131	20	0.304742	0.304465	0.304188	0.303912	0.303637	0.303362	0.303088	0.302815	0.303238	0.302966	0.303391	0.303121	0.302851	0.302582	0.303014	0.302747	0.302481	0.302216	0.301953	0.30169	0.301428	0.301167	0.300907	0.310784	0.310516	0.310948	0.310681	0.320553	0.320277	0.320701	0.320424	0.320148	0.319872	0.319596	0.319319	0.319738	0.319459	0.31918	0.318899	0.318618	0.318334	0.318049	0.317762	0.317473	0.317182	0.316887	0.31659
1	131	40	0.0700208	0.0692749	0.0685257	0.0677734	0.0670182	0.0662602	0.0654996	0.0647363	0.0639707	0.0632027	0.0624325	0.0616602	0.0608858	0.0601096	0.0593316	0.0585518	0.0577704	0.0569874	0.0562029	0.0554171	0.0546299	0.0538414	0.0530517	0.0522609	0.0514691	0.0506763	0.0498826	0.0497877	0.048992	0.0481955	0.0473985	0.0466008	0.0458027	0.0450042	0.0442054	0.0434063	0.0426071	0.0418078	0.0410085	0.0402093	0.04011	0.0400106	0.0399112	0.0391121	0.0383137	0.0375159	0.036719
2	131	80	-0.0162852	-0.0182208	-0.0201586	-0.0220982	-0.0240395	-0.0259819	-0.0279254	-0.0298694	-0.0318138	-0.0337582	-0.0357022	-0.0376455	-0.0388942	-0.0408356	-0.042079	-0.044017	-0.0459527	-0.0478856	-0.0498154	-0.0517417	-0.0536642	-0.0555825	-0.0574963	-0.0594052	-0.0613089	-0.0632069	-0.065099	-0.0669847	-0.0688637	-0.0707357	-0.0726002	-0.074457	-0.0763057	-0.0774461	-0.0792779	-0.0811006	-0.0829137	-0.0847171	-0.0865102	-0.0882929	-0.0900648	-0.0918255	-0.0928786	-0.0939169	-0.0956433	-0.0973574	-0.099059
0	132	20	-0.201699	-0.201304	-0.200923	-0.200557	-0.200205	-0.199867	-0.183274	-0.182974	-0.182688	-0.182415	-0.182155	-0.181908	-0.181674	-0.181452	-0.165017	-0.16483	-0.164653	-0.164488	-0.164334	-0.16419	-0.164057	-0.163934	-0.163821	-0.163717	-0.163623	-0.163538	-0.163462	-0.163394	-0.163334	-0.163282	-0.163239	-0.163201	-0.163171	-0.163147	-0.163129	-0.163117	-0.163111	-0.16311	-0.146889	-0.146908	-0.146931	-0.146958	-0.146988	-0.147022	-0.147058	-0.147097	-0.147139
1	132	40	-0.485205	-0.483172	-0.481119	-0.462866	-0.460788	-0.458694	-0.456581	-0.454452	-0.452306	-0.43392	-0.431753	-0.429571	-0.427374	-0.425162	-0.422937	-0.420698	-0.418445	-0.416181	-0.413905	-0.411616	-0.409315	-0.407003	-0.40468	-0.386148	-0.383815	-0.381472	-0.379121	-0.360578	-0.358219	-0.355853	-0.353479	-0.351098	-0.348711	-0.346318	-0.343919	-0.341515	-0.339107	-0.336694	-0.334277	-0.331856	-0.329433	-0.327008	-0.324581	-0.322151	-0.31972	-0.317289	-0.314858
2	132	80	0.796226	0.794351	0.792446	0.790509	0.788541	0.786542	0.784513	0.782452	0.780362	0.778241	0.792086	0.789895	0.787674	0.785423	0.783141	0.780832	0.778493	0.776125	0.773727	0.771301	0.768846	0.766362	0.763849	0.761308	0.758738	0.756139	0.753512	0.750857	0.748173	0.745461	0.742721	0.739952	0.737156	0.734331	0.731478	0.728597	0.725688	0.722751	0.719786	0.716793	0.713773	0.710724	0.707648	0.704544	0.701412	0.714319	0.711121
0	133	20	-0.0337269	-0.0382273	-0.0426896	-0.0471128	-0.0514962	-0.055839	-0.0601403	-0.0643994	-0.0686154	-0.0727875	-0.076915	-0.080997	-0.0850328	-0.0890216	-0.0929577	-0.0968502	-0.100693	-0.104486	-0.108228	-0.111919	-0.115557	-0.119143	-0.122674	-0.126151	-0.129573	-0.132939	-0.136249	-0.139502	-0.142697	-0.145834	-0.148912	-0.15193	-0.154889	-0.157787	-0.160624	-0.1634	-0.166114	-0.168766	-0.171355	-0.173881	-0.176343	-0.178737	-0.181071	-0.183341	-0.185547	-0.187688	-0.189763
1	133	40	-0.990732	-0.987972	-0.985197	-0.982408	-0.979598	-0.976779	-0.973943	-0.971092	-0.968221	-0.965338	-0.962439	-0.959523	-0.956591	-0.953642	-0.950676	-0.947693	-0.944692	-0.941675	-0.93864	-0.935588	-0.932513	-0.929426	-0.92632	-0.923198	-0.920057	-0.916899	-0.913722	-0.910528	-0.907316	-0.904086	-0.900839	-0.897573	-0.894289	-0.890988	-0.887669	-0.884332	-0.880977	-0.877604	-0.874209	-0.870801	-0.867376	-0.863933	-0.860472	-0.856994	-0.853493	-0.849981	-0.84645
2	133	80	0.225748	0.226201	0.226664	0.227138	0.227621	0.228114	0.228617	0.229131	0.229654	0.230193	0.230736	0.231289	0.231853	0.232426	0.233009	0.233602	0.234205	0.234818	0.23544	0.236071	0.236713	0.237363	0.238023	0.238693	0.239376	0.240064	0.240761	0.241468	0.242183	0.242907	0.24364	0.244382	0.245133	0.245893	0.246666	0.247443	0.24823	0.249024	0.249828	0.25064	0.251462	0.252291	0.25313	0.253977	0.254834	0.255699	0.256572
0	134	20	-0.871567	-0.867333	-0.863095	-0.858854	-0.854608	-0.850359	-0.846106	-0.841849	-0.837589	-0.833326	-0.829059	-0.82479	-0.820517	-0.814287	-0.810012	-0.805734	-0.801454	-0.797172	-0.792889	-0.788606	-0.784321	-0.780036	-0.775751	-0.771466	-0.767182	-0.762899	-0.758618	-0.752385	-0.74811	-0.743838	-0.73957	-0.735306	-0.731047	-0.726792	-0.722544	-0.718301	-0.714065	-0.709837	-0.705616	-0.701404	-0.6972	-0.693007	-0.688823	-0.68465	-0.680489	-0.676339	-0.672202
1	134	40	-0.853041	-0.85076	-0.848461	-0.846143	-0.843808	-0.841454	-0.839081	-0.83669	-0.83428	-0.831852	-0.829404	-0.826937	-0.824451	-0.821946	-0.819421	-0.816878	-0.814315	-0.811732	-0.80913	-0.806509	-0.803869	-0.801209	-0.79853	-0.795832	-0.793115	-0.790378	-0.787623	-0.784848	-0.782055	-0.779243	-0.774433	-0.771585	-0.76872	-0.765836	-0.762934	-0.758034	-0.755098	-0.752145	-0.749173	-0.746184	-0.743178	-0.740155	-0.737115	-0.734058	-0.730984	-0.725914	-0.72281
2	134	80	-0.594032	-0.59248	-0.590928	-0.589377	-0.587827	-0.586276	-0.584726	-0.583175	-0.581623	-0.58007	-0.578516	-0.57696	-0.575402	-0.573841	-0.572278	-0.570712	-0.569143	-0.56757	-0.565994	-0.564412	-0.560872	-0.559283	-0.557689	-0.556089	-0.554483	-0.55287	-0.55125	-0.547675	-0.546042	-0.544402	-0.542752	-0.541095	-0.539427	-0.537751	-0.536064	-0.534367	-0.532659	-0.530939	-0.529209	-0.527466	-0.525711	-0.523943	-0.522162	-0.520368	-0.51856	-0.516737	-0.5149
0	135	20	0.094423	0.0944714	0.0944931	0.0944881	0.0944563	0.0943977	0.0943125	0.0942005	0.0940618	0.0938964	0.0937044	0.0934858	0.0932407	0.0929691	0.0926711	0.0923468	0.0969989	0.0966171	0.0962092	0.0957754	0.0953159	0.0948316	0.0943208	0.0937847	0.0932234	0.092637	0.0920258	0.0913899	0.0907294	0.0900447	0.0893359	0.0886031	0.0878467	0.0870669	0.0862638	0.0854378	0.084589	0.0837177	0.0828242	0.0819088	0.0809717	0.0800131	0.0790334	0.0780328	0.0770117	0.0759703	0.0749088
1	135	40	0.0809764	0.0791446	0.0772872	0.0754042	0.0734953	0.0715606	0.0696	0.0676136	0.0656012	0.063563	0.0614988	0.0594089	0.0572931	0.0551516	0.0529844	0.0507917	0.0485736	0.0463302	0.0440616	0.041768	0.0394496	0.0371066	0.0347392	0.0323477	0.0299322	0.0274932	0.0250307	0.0225452	0.020037	0.0175063	0.0149536	0.0123791	0.00978329	0.00716652	0.00452918	0.0018717	-0.000805486	-0.00350195	-0.00621722	-0.00895083	-0.0117023	-0.0144711	-0.0172568	-0.0200588	-0.0228765	-0.0257095	-0.0285572
2	135	80	0.125722	0.124107	0.122515	0.120944	0.119396	0.11787	0.116366	0.114884	0.113425	0.111987	0.110572	0.109179	0.107808	0.10646	0.105133	0.103828	0.102547	0.101286	0.100048	0.098831	0.0976362	0.0964631	0.0953117	0.094182	0.0930738	0.091987	0.0909217	0.0898775	0.0888546	0.0878526	0.0868716	0.0859113	0.0849716	0.0840525	0.0831537	0.082275	0.0814164	0.0805777	0.0797586	0.078959	0.0781788	0.0774177	0.0766756	0.0759523	0.0752476	0.0745613	0.0738933
0	136	20	-0.193841	-0.196478	-0.199097	-0.201696	-0.204277	-0.206839	-0.209382	-0.211908	-0.214416	-0.216906	-0.219378	-0.221833	-0.224271	-0.226693	-0.229097	-0.231484	-0.233855	-0.236209	-0.238547	-0.239764	-0.24207	-0.244359	-0.246632	-0.248889	-0.251129	-0.253352	-0.255559	-0.25775	-0.259924	-0.262081	-0.264221	-0.266345	-0.268451	-0.27054	-0.272612	-0.274666	-0.276703	-0.278722	-0.280722	-0.282705	-0.284669	-0.286614	-0.28854	-0.290447	-0.291229	-0.293098	-0.294947
1	136	40	-0.169441	-0.170125	-0.170775	-0.171392	-0.171976	-0.172528	-0.173047	-0.173535	-0.173992	-0.174417	-0.174811	-0.175175	-0.175508	-0.175812	-0.176086	-0.17633	-0.175478	-0.175665	-0.175823	-0.175953	-0.176055	-0.176129	-0.176175	-0.176193	-0.176184	-0.176149	-0.176086	-0.175997	-0.175881	-0.175738	-0.17557	-0.175376	-0.175156	-0.17491	-0.174639	-0.174343	-0.174021	-0.173674	-0.173303	-0.172907	-0.172487	-0.172042	-0.171573	-0.17108	-0.170563	-0.170022	-0.169458
2	136	80	0.187501	0.187191	0.186858	0.186502	0.186124	0.185724	0.185302	0.184858	0.184394	0.183908	0.183401	0.182874	0.182327	0.18176	0.181173	0.180567	0.179942	0.179297	0.178635	0.177954	0.177256	0.176539	0.175806	0.175055	0.174288	0.173504	0.172705	0.171889	0.171058	0.170211	0.16935	0.168474	0.167583	0.166678	0.165759	0.164826	0.16388	0.162921	0.161948	0.160963	0.159965	0.158954	0.157932	0.157951	0.156903	0.155844	0.154773
0	137	20	-0.806889	-0.807477	-0.807991	-0.808433	-0.808803	-0.809088	-0.809314	-0.809469	-0.809555	-0.809557	-0.809503	-0.809381	-0.80919	-0.808932	-0.808607	-0.808216	-0.807761	-0.807239	-0.806655	-0.806006	-0.805281	-0.804507	-0.803671	-0.802774	-0.801818	-0.800803	-0.799729	-0.798598	-0.797397	-0.796152	-0.794853	-0.793499	-0.792079	-0.790618	-0.789106	-0.787542	-0.785928	-0.784226	-0.782513	-0.780753	-0.778932	-0.777078	-0.775178	-0.773233	-0.771245	-0.769213	-0.767138
1	137	40	-0.405413	-0.401961	-0.398488	-0.394993	-0.391479	-0.387942	-0.384383	-0.380803	-0.377189	-0.373567	-0.369923	-0.366258	-0.362572	-0.358865	-0.355139	-0.35139	-0.34762	-0.343829	-0.340018	-0.336187	-0.332323	-0.328452	-0.32456	-0.320649	-0.316718	-0.312768	-0.308799	-0.304811	-0.300804	-0.296778	-0.292734	-0.288672	-0.28458	-0.280482	-0.276368	-0.272235	-0.268074	-0.263908	-0.259725	-0.255527	-0.2513	-0.247069	-0.242823	-0.238562	-0.234285	-0.229994	-0.225675
2	137	80	-0.0755919	-0.0800455	-0.0844693	-0.0888625	-0.0932243	-0.0975407	-0.101837	-0.106099	-0.110327	-0.114519	-0.118674	-0.122792	-0.12686	-0.130889	-0.134891	-0.138854	-0.142775	-0.146656	-0.150494	-0.15429	-0.158042	-0.161751	-0.165416	-0.169023	-0.172597	-0.176126	-0.179609	-0.183046	-0.186436	-0.189778	-0.193073	-0.196321	-0.199521	-0.202672	-0.205776	-0.208831	-0.211824	-0.214782	-0.217692	-0.220553	-0.223365	-0.226129	-0.228844	-0.231511	-0.234117	-0.236675	-0.239198
0	138	20	-1.07473	-1.07116	-1.06759	-1.06404	-1.0605	-1.05696	-1.05344	-1.04993	-1.04643	-1.04294	-1.03946	-1.03471	-1.03125	-1.0278	-1.02435	-1.02092	-1.01749	-1.01408	-1.01067	-1.00727	-1.00388	-1.00049	-0.997111	-0.991156	-0.987792	-0.984435	-0.981083	-0.977737	-0.973109	-0.969774	-0.966445	-0.963119	-0.959799	-0.956482	-0.953168	-0.949858	-0.946551	-0.943247	-0.939946	-0.936646	-0.933349	-0.909061	-0.905784	-0.881438	-0.878181	-0.874924	-0.871667
1	138	40	-0.308735	-0.305827	-0.302912	-0.299989	-0.297058	-0.294119	-0.291172	-0.288218	-0.285255	-0.282285	-0.278003	-0.275017	-0.272024	-0.269022	-0.266012	-0.262995	-0.257361	-0.25433	-0.25129	-0.248243	-0.245188	-0.242125	-0.239054	-0.235976	-0.231586	-0.228493	-0.225394	-0.222287	-0.219173	-0.214743	-0.211616	-0.208482	-0.204034	-0.200889	-0.197737	-0.194579	-0.191415	-0.188245	-0.18507	-0.181889	-0.178704	-0.175513	-0.172318	-0.169119	-0.165915	-0.162708	-0.159497
2	138	80	-0.109559	-0.108589	-0.107622	-0.106657	-0.105695	-0.104735	-0.103777	-0.102821	-0.101868	-0.100917	-0.0999681	-0.0990213	-0.0980767	-0.095833	-0.0948939	-0.093957	-0.0930224	-0.0920903	-0.0911606	-0.0902335	-0.089309	-0.0883874	-0.0874688	-0.0865533	-0.085641	-0.0847322	-0.083827	-0.0829256	-0.0820284	-0.0811354	-0.0802469	-0.0793632	-0.0784846	-0.0776113	-0.0767436	-0.0758818	-0.0750262	-0.074177	-0.0733347	-0.0724995	-0.0703629	-0.069544	-0.0687331	-0.0679307	-0.067137	-0.0663525	-0.0655773
0	139	20	-0.438222	-0.435577	-0.432943	-0.430319	-0.427705	-0.425101	-0.422506	-0.419919	-0.417341	-0.414772	-0.41221	-0.409655	-0.407108	-0.404567	-0.402032	-0.399504	-0.39698	-0.394462	-0.391949	-0.389439	-0.386934	-0.384433	-0.381935	-0.37944	-0.376947	-0.374457	-0.371969	-0.369483	-0.366999	-0.364515	-0.362033	-0.359552	-0.357071	-0.354591	-0.352111	-0.349631	-0.347151	-0.344671	-0.34219	-0.338997	-0.336516	-0.334034	-0.331552	-0.329069	-0.326585	-0.324101	-0.321615
1	139	40	0.153083	0.152799	0.152504	0.152199	0.151883	0.151557	0.15122	0.150873	0.150516	0.150148	0.14977	0.150087	0.149689	0.149281	0.148863	0.148435	0.147998	0.147552	0.147096	0.146631	0.146157	0.146827	0.146333	0.145831	0.145321	0.144802	0.144276	0.143742	0.143201	0.142653	0.142097	0.141535	0.14167	0.141095	0.140514	0.139927	0.139334	0.138736	0.138133	0.137525	0.136913	0.136297	0.135676	0.135052	0.134424	0.133794	0.13316
2	139	80	0.0974038	0.0972755	0.0971474	0.0970195	0.0968917	0.0967639	0.0966359	0.0965078	0.0975323	0.0974012	0.0972696	0.0971376	0.097005	0.0968717	0.0967376	0.0966028	0.0964671	0.0963304	0.0961927	0.0960539	0.095914	0.0964783	0.0963356	0.0961915	0.0960461	0.0958992	0.0957508	0.0956009	0.0954494	0.0952963	0.0951414	0.0949848	0.0948264	0.0946662	0.0945042	0.0943401	0.0941742	0.0940062	0.0938362	0.0936642	0.0941951	0.0940185	0.0938397	0.0936587	0.0934756	0.0932903	0.0931028
0	140	20	-0.208918	-0.207948	-0.206984	-0.206025	-0.20507	-0.204118	-0.20317	-0.202223	-0.201279	-0.200336	-0.199393	-0.198449	-0.197506	-0.196561	-0.195614	-0.194665	-0.193713	-0.192758	-0.191799	-0.190836	-0.189867	-0.188894	-0.187915	-0.18693	-0.185939	-0.184941	-0.183936	-0.182923	-0.181903	-0.180874	-0.179838	-0.178793	-0.177738	-0.176675	-0.175602	-0.17452	-0.173429	-0.172327	-0.171216	-0.170095	-0.168963	-0.167822	-0.16667	-0.165507	-0.164335	-0.163152	-0.161958
1	140	40	0.0797809	0.0795206	0.0792605	0.0790003	0.0787403	0.0784805	0.0782211	0.0779623	0.0777041	0.0774466	0.0771901	0.0769346	0.0766803	0.0764273	0.0761757	0.0759257	0.0756773	0.0754307	0.0751861	0.0749434	0.0747029	0.0744646	0.0742288	0.0739954	0.0737645	0.0735364	0.0733111	0.0730887	0.0728693	0.072653	0.0724399	0.0722301	0.0720236	0.0718207	0.0716213	0.0714256	0.0712336	0.0710456	0.0708613	0.0706811	0.070505	0.070333	0.0701652	0.0700016	0.0698425	0.0696879	0.0695376
2	140	80	-0.574375	-0.571259	-0.568132	-0.564994	-0.561846	-0.558688	-0.55552	-0.552343	-0.549158	-0.545963	-0.542761	-0.539551	-0.536333	-0.533108	-0.529876	-0.526636	-0.523391	-0.520139	-0.51688	-0.513616	-0.510346	-0.50707	-0.503789	-0.500502	-0.49721	-0.493912	-0.49061	-0.487303	-0.48399	-0.480673	-0.477351	-0.474024	-0.470693	-0.467357	-0.464016	-0.460671	-0.457321	-0.453967	-0.450608	-0.447244	-0.443876	-0.440503	-0.437125	-0.433743	-0.430356	-0.426965	-0.423569
0	142	20	0.0781147	0.0785433	0.0789978	0.0794774	0.0799811	0.0805079	0.081057	0.0816274	0.0822183	0.0828286	0.0834576	0.0841042	0.0847676	0.085447	0.0861413	0.0868498	0.0875716	0.0883059	0.0890517	0.0898082	0.0905747	0.0913502	0.092134	0.0929253	0.0937232	0.0945271	0.095336	0.0961493	0.0969662	0.097786	0.0986079	0.0994312	0.100255	0.101079	0.101902	0.102724	0.103545	0.104362	0.105176	0.105987	0.106793	0.10764	0.108435	0.109224	0.110007	0.110782	0.111596
1	142	40	1.11129	1.10424	1.09718	1.09011	1.08302	1.07592	1.0688	1.06168	1.05455	1.04741	1.04027	1.03312	1.02596	1.0188	1.01164	1.00448	0.997313	0.990148	0.982985	0.975824	0.968666	0.961511	0.954362	0.947217	0.940079	0.932948	0.925825	0.918711	0.911607	0.904513	0.89743	0.89036	0.883302	0.876257	0.869227	0.862212	0.855212	0.84823	0.841264	0.834317	0.827388	0.820478	0.813589	0.80672	0.799873	0.793048	0.786246
2	142	80	0.602735	0.600588	0.59846	0.59635	0.594258	0.592184	0.590127	0.588087	0.586063	0.584054	0.58206	0.58008	0.578113	0.576157	0.574213	0.57228	0.570357	0.568442	0.566534	0.564633	0.562738	0.560847	0.558959	0.557074	0.555189	0.553305	0.551419	0.549532	0.547641	0.545745	0.543843	0.541935	0.540018	0.538092	0.536155	0.534206	0.532245	0.530269	0.528278	0.526271	0.524246	0.522203	0.52014	0.518056	0.515951	0.513822	0.511671
0	143	20	0.325607	0.32284	0.320082	0.317333	0.314596	0.31187	0.309156	0.306456	0.30377	0.301098	0.298442	0.295801	0.293178	0.290572	0.287984	0.285414	0.282864	0.280334	0.277824	0.275336	0.272868	0.270423	0.268001	0.265602	0.263226	0.260874	0.258547	0.256245	0.253968	0.251717	0.249492	0.247293	0.245121	0.242977	0.24086	0.23877	0.236709	0.234676	0.232671	0.230695	0.228749	0.226831	0.224943	0.224988	0.223158	0.221359	0.21959
1	143	40	-0.142557	-0.1421	-0.141648	-0.141202	-0.140761	-0.140327	-0.1399	-0.137578	-0.137167	-0.136764	-0.136369	-0.135984	-0.135608	-0.135242	-0.134887	-0.134541	-0.134207	-0.131987	-0.131676	-0.131377	-0.131089	-0.130814	-0.128646	-0.128396	-0.128158	-0.127932	-0.127718	-0.127517	-0.127328	-0.127152	-0.126988	-0.126836	-0.126696	-0.126567	-0.126451	-0.126346	-0.126252	-0.12617	-0.126098	-0.126037	-0.125987	-0.125947	-0.125916	-0.125895	-0.125884	-0.125881	-0.125887
2	143	80	-0.210697	-0.208675	-0.20668	-0.204712	-0.202772	-0.200859	-0.198975	-0.197118	-0.195289	-0.193488	-0.191715	-0.189969	-0.188252	-0.184665	-0.183004	-0.181371	-0.179765	-0.178187	-0.176637	-0.175114	-0.173618	-0.17215	-0.170708	-0.169294	-0.167907	-0.166547	-0.165214	-0.163907	-0.162627	-0.161374	-0.160147	-0.158946	-0.157771	-0.156623	-0.1555	-0.154403	-0.153332	-0.152287	-0.151267	-0.150272	-0.149303	-0.148359	-0.147439	-0.146545	-0.143779	-0.142934	-0.142115
0	144	20	-0.18891	-0.18766	-0.18642	-0.185189	-0.183966	-0.182752	-0.181545	-0.180346	-0.179154	-0.177969	-0.176791	-0.175619	-0.174454	-0.173294	-0.17214	-0.170991	-0.169848	-0.16871	-0.167576	-0.166447	-0.165323	-0.164204	-0.163088	-0.161977	-0.16087	-0.159767	-0.158667	-0.157572	-0.15648	-0.155392	-0.154307	-0.153227	-0.140734	-0.139668	-0.138604	-0.137545	-0.136489	-0.135437	-0.134388	-0.133344	-0.132303	-0.131267	-0.130235	-0.129207	-0.128183	-0.127164	-0.12615
1	144	40	-0.185295	-0.188772	-0.192235	-0.195683	-0.199114	-0.202528	-0.205922	-0.209296	-0.212648	-0.215977	-0.219282	-0.222561	-0.225814	-0.229038	-0.232233	-0.235397	-0.238529	-0.241628	-0.244693	-0.247723	-0.250715	-0.253669	-0.256584	-0.259459	-0.262292	-0.265082	-0.267828	-0.270529	-0.273183	-0.27579	-0.278349	-0.280858	-0.283316	-0.285722	-0.288075	-0.290374	-0.292618	-0.294807	-0.296938	-0.299011	-0.301025	-0.30298	-0.304873	-0.306705	-0.308475	-0.310181	-0.311822
2	144	80	0.0146548	0.012433	0.0101812	0.00790002	0.0055903	0.00325279	0.000888261	-0.00150245	-0.00391851	-0.00635903	-0.00882313	-0.0113099	-0.00230675	-0.0048428	-0.00739863	-0.00997321	-0.0125655	-0.0151745	-0.0177992	-0.0204384	-0.0230911	-0.0257561	-0.0284324	-0.0311188	-0.0338141	-0.0365173	-0.02771	-0.0304323	-0.033159	-0.0358888	-0.0386208	-0.0413536	-0.0440861	-0.0468172	-0.0495457	-0.0522705	-0.0549903	-0.0577041	-0.0604108	-0.0631092	-0.0657982	-0.0684767	-0.0711437	-0.073798	-0.0764386	-0.0790646	-0.0816748
0	146	20	0.057981	0.0600976	0.0810818	0.0831514	0.0852055	0.0872437	0.0892655	0.0912701	0.0932572	0.0952261	0.0971764	0.0991074	0.101019	0.10291	0.10478	0.10663	0.108457	0.110262	0.112045	0.113804	0.11554	0.117252	0.118939	0.120601	0.122238	0.123849	0.125434	0.126992	0.128523	0.130027	0.131503	0.13295	0.134518	0.135907	0.137268	0.138598	0.140047	0.141317	0.142706	0.143914	0.145091	0.146237	0.14735	0.148431	0.14948	0.150496	0.151479
1	146	40	0.333102	0.331273	0.329426	0.327562	0.325829	0.323931	0.322017	0.320086	0.318139	0.316176	0.314198	0.312205	0.310196	0.308172	0.306134	0.304082	0.302015	0.299935	0.297841	0.295734	0.293613	0.29148	0.289334	0.287176	0.285006	0.282823	0.28063	0.278425	0.276209	0.273982	0.271744	0.269643	0.267385	0.265118	0.26284	0.260554	0.258259	0.255956	0.253644	0.251324	0.248996	0.246661	0.244467	0.242117	0.239908	0.237546	0.235178
2	146	80	0.802546	0.79737	0.792328	0.787123	0.782053	0.77682	0.771573	0.766312	0.761038	0.755751	0.75045	0.745137	0.73981	0.734472	0.729121	0.723757	0.718382	0.712996	0.707598	0.702189	0.69677	0.709917	0.723207	0.717722	0.712226	0.706721	0.701207	0.695684	0.690153	0.684613	0.679065	0.67351	0.667947	0.662377	0.6568	0.651216	0.645626	0.64003	0.634428	0.62882	0.623207	0.617589	0.611967	0.60634	0.600709	0.595073	0.589435
0	147	20	0.196862	0.19719	0.197494	0.197772	0.198024	0.198252	0.198454	0.19863	0.198781	0.198906	0.199005	0.199078	0.199125	0.199145	0.19914	0.199108	0.199049	0.198964	0.198852	0.198714	0.198549	0.198357	0.198139	0.197893	0.197622	0.197323	0.196997	0.196645	0.196266	0.19586	0.195428	0.194969	0.194484	0.193972	0.193434	0.19287	0.19228	0.191665	0.191023	0.190357	0.189665	0.188948	0.188206	0.18744	0.186649	0.185835	0.184997
1	147	40	0.231158	0.228148	0.225169	0.222219	0.2193	0.216411	0.213554	0.210728	0.207934	0.205172	0.202442	0.199744	0.197079	0.194446	0.191846	0.189278	0.186744	0.184242	0.181772	0.179336	0.176932	0.174562	0.172223	0.169918	0.167645	0.165404	0.163196	0.16102	0.158876	0.156764	0.154684	0.152635	0.150618	0.148632	0.146678	0.144754	0.142861	0.140999	0.139168	0.137366	0.135594	0.133851	0.132138	0.130454	0.128799	0.127173	0.125575
2	147	80	0.367438	0.364525	0.361651	0.358813	0.356013	0.35325	0.350524	0.347833	0.345179	0.342559	0.339975	0.337425	0.334909	0.332427	0.329977	0.327561	0.325176	0.322823	0.320501	0.318209	0.315948	0.313716	0.311512	0.309337	0.307189	0.305069	0.302975	0.300907	0.298864	0.296845	0.294851	0.292881	0.290933	0.289008	0.287104	0.285221	0.283359	0.281517	0.279695	0.277891	0.276105	0.274337	0.272586	0.270852	0.269134	0.267431	0.265744
0	148	20	0.0224986	0.0225192	0.0225425	0.0225688	0.0225978	0.0226294	0.0226635	0.0227001	0.022739	0.0227802	0.0228234	0.0228686	0.0229156	0.0229644	0.0230147	0.0230665	0.0231194	0.0231736	0.0232288	0.0232848	0.0233415	0.0233986	0.0234561	0.0235136	0.0235711	0.0236283	0.0236851	0.0237409	0.0237961	0.0238503	0.0239031	0.0239544	0.024004	0.0240516	0.0240971	0.0241403	0.0241808	0.0242185	0.0242532	0.0242847	0.0243126	0.0243369	0.0243573	0.0243736	0.0243856	0.024393	0.0243957
1	148	40	0.0866057	0.0852068	0.0838309	0.0824787	0.0811501	0.0798449	0.0785633	0.0773059	0.0760724	0.0748627	0.0736772	0.0725158	0.0713784	0.0702648	0.0691755	0.0681102	0.0670688	0.0660513	0.0650576	0.0640875	0.0631411	0.062218	0.0613183	0.0604416	0.0595878	0.0587567	0.0579481	0.0571617	0.0563972	0.0556545	0.0549331	0.0542328	0.0535533	0.0528939	0.0757156	0.0750803	0.0744643	0.0738674	0.073289	0.0727288	0.0721862	0.0716609	0.0711524	0.0706603	0.070184	0.0697231	0.0692772
2	148	80	0.215603	0.212943	0.210271	0.207587	0.204892	0.202186	0.199469	0.19674	0.194	0.191248	0.188486	0.185714	0.18293	0.180136	0.177332	0.174517	0.171692	0.168858	0.166014	0.186659	0.183781	0.180894	0.178	0.175097	0.172186	0.169268	0.166343	0.163411	0.160473	0.157528	0.154579	0.151624	0.148665	0.145701	0.142733	0.139762	0.136788	0.133812	0.130833	0.127853	0.124871	0.121888	0.118906	0.115923	0.112941	0.109959	0.106979
0	149	20	-0.115664	-0.116049	-0.116441	-0.11684	-0.117244	-0.117655	-0.118072	-0.118495	-0.118923	-0.119358	-0.119799	-0.120245	-0.120697	-0.121155	-0.121618	-0.122086	-0.12256	-0.123039	-0.123522	-0.12401	-0.124503	-0.125	-0.125501	-0.126006	-0.126515	-0.127028	-0.127543	-0.128062	-0.128584	-0.129108	-0.129634	-0.130163	-0.130693	-0.131225	-0.131758	-0.132292	-0.132826	-0.133361	-0.133896	-0.13443	-0.134964	-0.135497	-0.136028	-0.136558	-0.137086	-0.137611	-0.138134
1	149	40	0.768079	0.767127	0.766171	0.765212	0.764248	0.76328	0.762305	0.761325	0.760338	0.759343	0.758341	0.757331	0.793364	0.792295	0.791216	0.790127	0.789026	0.787914	0.786789	0.785652	0.784501	0.783336	0.782157	0.780963	0.779754	0.778529	0.777288	0.77603	0.774754	0.773461	0.772149	0.770819	0.76947	0.768101	0.766713	0.765304	0.763874	0.762423	0.760951	0.759457	0.75794	0.756401	0.754839	0.753254	0.751645	0.750012	0.748355
2	149	80	-0.312179	-0.314353	-0.316501	-0.318622	-0.320717	-0.322787	-0.324833	-0.326854	-0.328851	-0.330825	-0.332776	-0.334706	-0.336613	-0.338499	-0.340364	-0.34221	-0.344035	-0.345841	-0.347628	-0.349397	-0.314095	-0.315868	-0.317624	-0.319363	-0.321086	-0.322792	-0.324482	-0.326157	-0.327817	-0.329461	-0.33109	-0.332705	-0.334305	-0.33589	-0.337461	-0.339017	-0.340559	-0.342086	-0.343599	-0.345097	-0.34658	-0.348048	-0.349501	-0.350938	-0.35236	-0.353765	-0.355154
0	150	20	0.0987605	0.097715	0.096682	0.0956614	0.0946531	0.093657	0.0926731	0.0917011	0.0907411	0.0897929	0.0888565	0.0879317	0.0870186	0.086117	0.0852268	0.0843481	0.0837234	0.0828668	0.0820214	0.0811871	0.0803639	0.0795517	0.0787505	0.0779602	0.0771808	0.0766549	0.0758967	0.0751493	0.0744126	0.0736865	0.0729712	0.0722664	0.0715723	0.0708887	0.0702157	0.0695532	0.0689013	0.0682598	0.0676288	0.0670083	0.0666415	0.0660415	0.0654519	0.0648728	0.0643041	0.0637459	0.063198
1	150	40	0.201065	0.200217	0.199367	0.198513	0.197657	0.196799	0.195937	0.195073	0.194206	0.193337	0.192465	0.19159	0.190713	0.189833	0.18895	0.188065	0.187178	0.186288	0.185395	0.185239	0.18434	0.184177	0.183272	0.182363	0.181452	0.180538	0.179622	0.178702	0.177779	0.176853	0.175924	0.174992	0.174056	0.173117	0.172175	0.171229	0.170279	0.169325	0.168368	0.167407	0.166441	0.165472	0.164498	0.16352	0.162537	0.16155	0.160557
2	150	80	0.155765	0.156257	0.156739	0.157212	0.157675	0.158129	0.15881	0.159244	0.159669	0.160084	0.160489	0.160885	0.161271	0.161647	0.162014	0.162371	0.162719	0.163058	0.163388	0.163709	0.16402	0.164323	0.164618	0.164904	0.165181	0.16545	0.165712	0.165966	0.166212	0.16645	0.166682	0.166906	0.167124	0.167809	0.168013	0.168211	0.168404	0.168591	0.168772	0.168948	0.16912	0.169287	0.16945	0.169608	0.169763	0.170151	0.170535
0	151	20	-0.235343	-0.236936	-0.238515	-0.240081	-0.241632	-0.243168	-0.244691	-0.246199	-0.247692	-0.249171	-0.248032	-0.249485	-0.245731	-0.247163	-0.24858	-0.249983	-0.251369	-0.252739	-0.254093	-0.255431	-0.256754	-0.25806	-0.25935	-0.260624	-0.261882	-0.263123	-0.264348	-0.265556	-0.266748	-0.267923	-0.269082	-0.270224	-0.271348	-0.272456	-0.273546	-0.274619	-0.275676	-0.276715	-0.277736	-0.278741	-0.279728	-0.280697	-0.28165	-0.282585	-0.283502	-0.284402	-0.285283
1	151	40	-0.613234	-0.610438	-0.607626	-0.604797	-0.601955	-0.599094	-0.596218	-0.593327	-0.590422	-0.587503	-0.584571	-0.581625	-0.578666	-0.575695	-0.572712	-0.569718	-0.564023	-0.561012	-0.557991	-0.55496	-0.551919	-0.54887	-0.545812	-0.542747	-0.539675	-0.536595	-0.533508	-0.530415	-0.527316	-0.524212	-0.521103	-0.517989	-0.514871	-0.51175	-0.508625	-0.505498	-0.502368	-0.499237	-0.496103	-0.492968	-0.489831	-0.486695	-0.483558	-0.480421	-0.477285	-0.474149	-0.471015
2	151	80	-0.142262	-0.142829	-0.143377	-0.143905	-0.144414	-0.144902	-0.145369	-0.145817	-0.146243	-0.146648	-0.147031	-0.147393	-0.147733	-0.148051	-0.148346	-0.148619	-0.14887	-0.149097	-0.149302	-0.149483	-0.149642	-0.149776	-0.149888	-0.149975	-0.15004	-0.15008	-0.150096	-0.150089	-0.150059	-0.150004	-0.149925	-0.147218	-0.147096	-0.146949	-0.146781	-0.146587	-0.146369	-0.146128	-0.145863	-0.145575	-0.145263	-0.144927	-0.144569	-0.144187	-0.143782	-0.143354	-0.142904
[truncated: 3,453 more columns]

## Sheet: panel B
	subject	correct	0	1	2	3	4	5	6	7	8	9	10	11	12	13	14	15	16	17	18	19	20	21	22	23	24	25	26	27	28	29	30	31	32	33	34	35	36	37	38	39	40	41	42	43	44	45	46
0	102	FALSE	0.225254	0.222834	0.220431	0.218043	0.215672	0.213316	0.210976	0.208651	0.206342	0.204048	0.20177	0.207385	0.205133	0.202895	0.200672	0.198465	0.196272	0.201907	0.199739	0.197586	0.195448	0.193324	0.191215	0.189121	0.187041	0.184976	0.182925	0.180889	0.178867	0.176859	0.174865	0.172886	0.170921	0.176849	0.174908	0.180814	0.178896	0.176992	0.175102	0.173226	0.171365	0.169516	0.167682	0.165861	0.164054	0.16226	0.16048
1	102	TRUE	-0.0364116	-0.0382747	-0.0401328	-0.0419859	-0.0438339	-0.0456767	-0.0451512	-0.0446077	-0.046437	-0.0482604	-0.0500781	-0.0518897	-0.0513184	-0.053119	-0.0549131	-0.0543238	-0.056106	-0.0578812	-0.0596492	-0.0614099	-0.063163	-0.0649085	-0.0666461	-0.0683756	-0.0700968	-0.0718095	-0.0711506	-0.0728472	-0.0745347	-0.0762128	-0.0755246	-0.0771851	-0.0788356	-0.0757562	-0.0773892	-0.0766559	-0.0782691	-0.0775086	-0.0791013	-0.0806828	-0.0822529	-0.0751528	-0.076708	-0.0782512	-0.0797824	-0.0813013	-0.0828078
0	103	FALSE	-0.185223	-0.188696	-0.189045	-0.189379	-0.189698	-0.190002	-0.193383	-0.193654	-0.193908	-0.194147	-0.194369	-0.197668	-0.197856	-0.198026	-0.19818	-0.198317	-0.198437	-0.198539	-0.198625	-0.198692	-0.198743	-0.198776	-0.198792	-0.19879	-0.19877	-0.198733	-0.198678	-0.198606	-0.198516	-0.198408	-0.198283	-0.19814	-0.197979	-0.197801	-0.197605	-0.197392	-0.197161	-0.200011	-0.199744	-0.199459	-0.199157	-0.198838	-0.198501	-0.198147	-0.197776	-0.197387	-0.196982
1	103	TRUE	0.0307968	0.0309323	0.0303055	0.0303992	0.0304718	0.0305234	0.030554	0.0305637	0.0305523	0.0305201	0.0282401	0.0286515	0.0278147	0.0276996	0.0275639	0.0274075	0.0264885	0.0262914	0.0260739	0.0258361	0.0248336	0.0245557	0.0242577	0.0239397	0.0236018	0.0232441	0.0228667	0.0224698	0.0225377	0.022101	0.0213888	0.0209131	0.0204185	0.019905	0.0193727	0.0188219	0.0182527	0.0176652	0.0170596	0.0142064	0.013566	0.0121636	0.0114885	0.0107962	0.0100868	0.00861843	0.00787588
0	104	FALSE	-0.132889	-0.133237	-0.133573	-0.132836	-0.133149	-0.13345	-0.133738	-0.134014	-0.134277	-0.133467	-0.132645	-0.131815	-0.130972	-0.131174	-0.131362	-0.131538	-0.1317	-0.13185	-0.131986	-0.13211	-0.13222	-0.132318	-0.131346	-0.130353	-0.130413	-0.13046	-0.130494	-0.130516	-0.130525	-0.130523	-0.130507	-0.128359	-0.128321	-0.127205	-0.127143	-0.12707	-0.126986	-0.12689	-0.126784	-0.126666	-0.126538	-0.126399	-0.12625	-0.126091	-0.125922	-0.125743	-0.125555
1	104	TRUE	-0.125445	-0.126797	-0.128157	-0.129523	-0.130896	-0.132275	-0.13366	-0.13505	-0.136445	-0.137845	-0.138619	-0.140026	-0.141436	-0.142849	-0.144264	-0.145681	-0.147098	-0.148516	-0.149934	-0.151352	-0.152769	-0.154184	-0.155597	-0.157007	-0.158415	-0.159819	-0.161219	-0.162614	-0.164004	-0.163985	-0.165366	-0.16674	-0.168106	-0.169465	-0.170816	-0.172157	-0.17349	-0.174813	-0.175496	-0.176798	-0.178089	-0.179368	-0.180635	-0.181889	-0.183131	-0.183733	-0.184315
0	105	FALSE	-0.902261	-0.898787	-0.895309	-0.891828	-0.888345	-0.884859	-0.881371	-0.877882	-0.87439	-0.870898	-0.867405	-0.863911	-0.860418	-0.856925	-0.853432	-0.84994	-0.84645	-0.842962	-0.839476	-0.835993	-0.832512	-0.829035	-0.825562	-0.822093	-0.818629	-0.81517	-0.811717	-0.808269	-0.804828	-0.801394	-0.797967	-0.794548	-0.791136	-0.787733	-0.78434	-0.780955	-0.77758	-0.774216	-0.770862	-0.767519	-0.764188	-0.760868	-0.757561	-0.754266	-0.750984	-0.747715	-0.74446
1	105	TRUE	-0.256871	-0.256046	-0.255219	-0.25439	-0.253558	-0.252723	-0.251886	-0.251047	-0.250205	-0.249362	-0.248516	-0.247669	-0.246819	-0.245968	-0.245116	-0.244261	-0.243406	-0.242548	-0.24169	-0.24083	-0.239969	-0.239107	-0.238243	-0.237379	-0.236514	-0.235649	-0.234782	-0.233915	-0.233048	-0.23218	-0.231312	-0.230444	-0.229575	-0.228707	-0.227839	-0.226971	-0.226103	-0.225236	-0.22437	-0.223504	-0.222639	-0.221775	-0.220912	-0.22005	-0.219189	-0.21833	-0.217472
0	106	FALSE	0.352551	0.352353	0.352178	0.352026	0.351898	0.351793	0.351711	0.351653	0.351617	0.351605	0.351615	0.351648	0.351703	0.35178	0.351879	0.352023	0.352165	0.352327	0.352534	0.352737	0.352959	0.353201	0.353462	0.35374	0.354037	0.354351	0.354681	0.355051	0.355413	0.35579	0.356182	0.356611	0.35703	0.357461	0.357904	0.358382	0.358871	0.359347	0.359832	0.360326	0.360852	0.361362	0.36188	0.362404	0.362934	0.363469	0.36401
1	106	TRUE	0.216093	0.21717	0.218283	0.219401	0.220553	0.221707	0.222877	0.22408	0.225282	0.226498	0.227759	0.229	0.230254	0.231518	0.232792	0.234075	0.235367	0.236681	0.237987	0.2393	0.240617	0.241939	0.243266	0.244595	0.245928	0.247262	0.248598	0.24995	0.251302	0.252638	0.253989	0.255323	0.256654	0.257983	0.259308	0.26066	0.261977	0.263289	0.264596	0.265896	0.26719	0.268477	0.269756	0.271027	0.27229	0.273543	0.274787
0	107	FALSE	0.111677	0.11096	0.110238	0.109513	0.108783	0.10805	0.107314	0.106576	0.124104	0.123348	0.12259	0.121833	0.121076	0.120321	0.119566	0.118814	0.118065	0.117318	0.116575	0.115837	0.115102	0.114373	0.113649	0.112932	0.11222	0.111516	0.110819	0.110129	0.109447	0.108773	0.108108	0.107452	0.106804	0.106166	0.105538	0.104919	0.10431	0.103712	0.103123	0.102545	0.101977	0.10142	0.100873	0.100336	0.0998105	0.0992952	0.0987903
1	107	TRUE	-0.135486	-0.135889	-0.131497	-0.131886	-0.132267	-0.132639	-0.133001	-0.133355	-0.133698	-0.134033	-0.134358	-0.134673	-0.13498	-0.130486	-0.130778	-0.131061	-0.131335	-0.126809	-0.12707	-0.127322	-0.127566	-0.127802	-0.12803	-0.128251	-0.128465	-0.128673	-0.128873	-0.129068	-0.129257	-0.124651	-0.124834	-0.125012	-0.125187	-0.125357	-0.125524	-0.125688	-0.12585	-0.126009	-0.126167	-0.126323	-0.126478	-0.126633	-0.126787	-0.126942	-0.127096	-0.127252	-0.127409
0	108	FALSE	0.638335	0.635575	0.632811	0.630042	0.627269	0.624494	0.621716	0.618937	0.616157	0.613377	0.610598	0.607821	0.605045	0.602273	0.599505	0.596742	0.593983	0.591231	0.588485	0.585746	0.583015	0.580292	0.577579	0.574876	0.572183	0.569502	0.568556	0.565893	0.563243	0.560605	0.557981	0.555371	0.552775	0.550193	0.547625	0.545074	0.542537	0.540017	0.537512	0.535024	0.532551	0.530096	0.527657	0.525234	0.522828	0.520439	0.519792
1	108	TRUE	0.111533	0.110898	0.110264	0.109629	0.108994	0.108768	0.108132	0.107497	0.106861	0.106226	0.105591	0.104956	0.104322	0.103688	0.103463	0.103237	0.102601	0.101965	0.101329	0.100693	0.100056	0.0994184	0.09878	0.0981408	0.0975005	0.0968589	0.0962157	0.0955705	0.0949235	0.0942742	0.0936224	0.0929677	0.09231	0.0916489	0.0909842	0.0903156	0.0896427	0.0889653	0.0882831	0.0875957	0.0869028	0.0862044	0.0854999	0.084789	0.0840717	0.0833475	0.0826159
0	109	FALSE	-0.195805	-0.196469	-0.197129	-0.197786	-0.198439	-0.199089	-0.199735	-0.200376	-0.201015	-0.201649	-0.202278	-0.202904	-0.203525	-0.204142	-0.204753	-0.205361	-0.205963	-0.206561	-0.207154	-0.207741	-0.197396	-0.197978	-0.198555	-0.199127	-0.188728	-0.189294	-0.189854	-0.190409	-0.190959	-0.191503	-0.192042	-0.192575	-0.193103	-0.193625	-0.183181	-0.183697	-0.184207	-0.184711	-0.18521	-0.185702	-0.18619	-0.186671	-0.176181	-0.176655	-0.177124	-0.177587	-0.178043
1	109	TRUE	-0.311727	-0.309528	-0.307338	-0.305159	-0.302991	-0.293879	-0.291735	-0.289604	-0.287486	-0.285381	-0.283289	-0.281211	-0.279148	-0.2771	-0.275068	-0.273051	-0.271051	-0.269069	-0.267103	-0.265154	-0.263225	-0.254359	-0.252469	-0.250598	-0.248747	-0.246916	-0.245105	-0.236396	-0.234629	-0.232883	-0.231158	-0.229455	-0.227774	-0.226114	-0.224476	-0.22286	-0.221268	-0.219696	-0.218148	-0.216621	-0.215117	-0.213636	-0.212177	-0.21074	-0.202372	-0.194025	-0.185727
0	110	FALSE	0.738108	0.740702	0.743256	0.745769	0.74824	0.75067	0.753057	0.755401	0.757701	0.759957	0.762168	0.764333	0.766452	0.768525	0.77055	0.772527	0.774455	0.776333	0.778162	0.779939	0.781664	0.783336	0.784955	0.78652	0.78803	0.789483	0.790881	0.79222	0.793501	0.794723	0.795885	0.796986	0.798025	0.799001	0.799914	0.800763	0.801547	0.802265	0.802916	0.8035	0.804015	0.804462	0.804839	0.805146	0.805381	0.805545	0.805637
1	110	TRUE	0.986753	0.985267	0.992593	0.991054	0.989492	0.987908	0.9863	0.984669	0.983014	0.981336	0.979634	0.977909	0.976159	0.974386	0.972589	0.970767	0.968921	0.96705	0.965155	0.963236	0.961291	0.959322	0.957328	0.955309	0.953265	0.951196	0.949102	0.946983	0.944838	0.942668	0.940472	0.938251	0.936005	0.933733	0.931435	0.929112	0.926763	0.924388	0.921987	0.919561	0.917109	0.914631	0.912128	0.909598	0.907042	0.904461	0.901853
0	111	FALSE	1.09041	1.08657	1.08276	1.07899	1.07524	1.07154	1.06786	1.06422	1.06062	1.05706	1.05353	1.05005	1.0466	1.04319	1.03982	1.03649	1.03321	1.02997	1.02677	1.02361	1.0205	1.01743	1.01441	1.01143	1.0085	1.00561	1.00277	0.999978	0.997229	0.994527	0.991871	0.989261	0.986698	0.98418	0.981708	0.979282	0.976902	0.974566	0.972275	0.970028	0.967824	0.965664	0.963546	0.961469	0.959433	0.957438	0.955481
1	111	TRUE	1.1056	1.10137	1.09712	1.09286	1.08859	1.08431	1.08002	1.07571	1.0714	1.06707	1.06273	1.05838	1.05402	1.04965	1.04527	1.04088	1.03647	1.03206	1.02764	1.02321	1.01878	1.01433	1.00988	1.00541	1.00094	0.996468	0.991984	0.987495	0.982999	0.978498	0.973992	0.969481	0.964965	0.960445	0.955921	0.951394	0.946864	0.942331	0.937796	0.93326	0.928722	0.924183	0.919643	0.915104	0.910564	0.906026	0.901488
0	112	FALSE	-0.638489	-0.63805	-0.637608	-0.637162	-0.636714	-0.636262	-0.635807	-0.635348	-0.625625	-0.625163	-0.61545	-0.614983	-0.614511	-0.614033	-0.604317	-0.603832	-0.603341	-0.602843	-0.602337	-0.601825	-0.592044	-0.591519	-0.590986	-0.590443	-0.589891	-0.589328	-0.588755	-0.58817	-0.587574	-0.586966	-0.586345	-0.585712	-0.585064	-0.584403	-0.583728	-0.583038	-0.582332	-0.581611	-0.580873	-0.580118	-0.579347	-0.578558	-0.577751	-0.576926	-0.576081	-0.575218	-0.574335
1	112	TRUE	-0.307749	-0.299539	-0.29882	-0.290609	-0.289878	-0.281644	-0.280903	-0.27265	-0.271902	-0.271149	-0.270392	-0.26963	-0.268866	-0.2681	-0.267331	-0.266561	-0.26579	-0.265018	-0.264247	-0.263477	-0.262708	-0.254446	-0.253685	-0.252927	-0.252173	-0.251422	-0.250676	-0.249934	-0.241692	-0.240965	-0.240245	-0.232034	-0.231331	-0.230634	-0.229946	-0.229265	-0.228593	-0.227929	-0.227274	-0.226629	-0.225993	-0.225366	-0.224749	-0.224142	-0.223546	-0.22296	-0.222384
0	113	FALSE	-0.176283	-0.177397	-0.178498	-0.179587	-0.180663	-0.181728	-0.18278	-0.183821	-0.184851	-0.18587	-0.186879	-0.187877	-0.188865	-0.189844	-0.190814	-0.191776	-0.192729	-0.193674	-0.194612	-0.195542	-0.196467	-0.197385	-0.198297	-0.199205	-0.200107	-0.201006	-0.201901	-0.202793	-0.203683	-0.20457	-0.205456	-0.206341	-0.207226	-0.208111	-0.208996	-0.209883	-0.210772	-0.211664	-0.212558	-0.213456	-0.214359	-0.215266	-0.216178	-0.217097	-0.218022	-0.218954	-0.219894
1	113	TRUE	0.0751157	0.0747656	0.0744059	0.0740365	0.0736574	0.0732685	0.0728697	0.0724609	0.0720422	0.0716134	0.0765877	0.0761354	0.075673	0.0752003	0.0747175	0.0742299	0.0737266	0.0732131	0.0726894	0.072161	0.071617	0.0710628	0.0704986	0.0699298	0.0693456	0.0687515	0.0681475	0.0675339	0.0669106	0.0662832	0.0656409	0.0649892	0.0643284	0.0636639	0.0629849	0.0622972	0.0616008	0.0608958	0.0601825	0.0594609	0.0587313	0.0634768	0.0627283	0.0619722	0.0612087	0.0604381	0.0596604
0	114	FALSE	0.282492	0.274363	0.2662	0.258002	0.24977	0.241506	0.233209	0.22488	0.21652	0.20813	0.19971	0.19126	0.182783	0.174277	0.165744	0.157185	0.1486	0.13999	0.131356	0.122698	0.114017	0.105314	0.0965895	0.0878439	0.0790783	0.0702933	0.0614897	0.0526682	0.0438297	0.0349748	0.0261043	0.0172192	0.00832019	-0.000591834	-0.009516	-0.0184514	-0.0273971	-0.0363523	-0.0453158	-0.0542867	-0.063264	-0.0722466	-0.0812335	-0.0902236	-0.0992156	-0.108209	-0.117201
1	114	TRUE	0.166612	0.165015	0.163411	0.161803	0.160187	0.158565	0.156939	0.155308	0.153672	0.152032	0.150387	0.148738	0.147085	0.14543	0.143771	0.14211	0.140446	0.13878	0.137112	0.135443	0.133773	0.132103	0.130431	0.128758	0.127086	0.125415	0.123742	0.122071	0.1204	0.11873	0.117061	0.115395	0.121802	0.120131	0.118463	0.116796	0.115133	0.113471	0.111813	0.110157	0.108506	0.106856	0.10521	0.103568	0.101929	0.100294	0.0986635
0	115	FALSE	-0.0891723	-0.0901708	-0.0911929	-0.0922381	-0.093306	-0.0943958	-0.0955072	-0.0966394	-0.0977921	-0.0989645	-0.100156	-0.101366	-0.102595	-0.103841	-0.105104	-0.106383	-0.107678	-0.108989	-0.109617	-0.110957	-0.112311	-0.113678	-0.115058	-0.11645	-0.117854	-0.119268	-0.120694	-0.12213	-0.122881	-0.124337	-0.125801	-0.127275	-0.128061	-0.129551	-0.131048	-0.132552	-0.134063	-0.135581	-0.137104	-0.138634	-0.140168	-0.141708	-0.143252	-0.144801	-0.146354	-0.147911	-0.149471
1	115	TRUE	0.271237	0.270404	0.269568	0.268729	0.267887	0.267043	0.266197	0.265349	0.264498	0.263647	0.262793	0.261938	0.261082	0.260225	0.259366	0.258506	0.257645	0.256783	0.25592	0.255055	0.25419	0.253324	0.252456	0.251587	0.250717	0.249845	0.248973	0.248098	0.247222	0.246344	0.245867	0.244985	0.244501	0.243614	0.242725	0.241832	0.240937	0.240039	0.239137	0.238231	0.237322	0.236408	0.23549	0.234568	0.23364	0.233109	0.23217
0	116	FALSE	-0.672723	-0.66261	-0.659601	-0.656579	-0.653545	-0.650498	-0.647439	-0.644368	-0.641284	-0.638188	-0.635079	-0.631958	-0.628825	-0.625681	-0.622524	-0.619356	-0.616177	-0.612986	-0.609785	-0.606573	-0.603351	-0.600118	-0.596876	-0.593625	-0.590365	-0.587096	-0.58382	-0.580535	-0.577243	-0.573945	-0.57064	-0.56733	-0.564014	-0.560694	-0.55737	-0.554041	-0.55071	-0.547377	-0.544041	-0.540704	-0.537367	-0.534029	-0.530691	-0.527355	-0.52402	-0.520688	-0.517358
1	116	TRUE	0.126054	0.125146	0.125096	0.124167	0.123228	0.123146	0.122185	0.121214	0.120232	0.120106	0.119103	0.118091	0.117068	0.116905	0.115862	0.115673	0.11461	0.113538	0.11332	0.113092	0.112855	0.111745	0.110625	0.109496	0.109225	0.108079	0.106924	0.105761	0.104591	0.103412	0.102226	0.101033	0.0998317	0.0998446	0.0994987	0.0991402	0.0979105	0.0975389	0.0962966	0.0950485	0.0937947	0.0925354	0.091271	0.0900016	0.0887275	0.0878014	0.0865179
0	117	FALSE	-0.0180341	-0.0173075	-0.0166034	-0.0159223	-0.0152648	-0.01463	-0.0140188	-0.0134313	-0.0128677	-0.0123281	-0.0118125	-0.0113212	-0.0108542	-0.0104116	-0.00999329	-0.00959941	-0.00922992	-0.00888482	-0.00856404	-0.00826752	-0.00799519	-0.00774693	-0.00752263	-0.00732213	-0.00714527	-0.00699187	-0.00686171	-0.00675456	-0.00667018	-0.0066083	-0.0065686	-0.00655132	-0.00569611	-0.00572289	-0.0057705	-0.00583852	-0.00592657	-0.0060342	-0.0061615	-0.00630697	-0.00647065	-0.00665205	-0.00685068	-0.00706602	-0.00729755	-0.00754474	-0.00780703
1	117	TRUE	0.118107	0.117414	0.116732	0.11606	0.115398	0.114747	0.114107	0.113477	0.112857	0.112247	0.111648	0.111058	0.110479	0.10991	0.10935	0.108801	0.108261	0.10773	0.10721	0.106698	0.106196	0.105703	0.105219	0.104744	0.104278	0.10382	0.103371	0.10293	0.102497	0.102072	0.101655	0.101245	0.100843	0.100448	0.10006	0.0996783	0.0993039	0.0989359	0.0985742	0.0982185	0.0978685	0.0975243	0.0971854	0.0968518	0.0968205	0.0964959	0.0961758
0	118	FALSE	-1.49469	-1.49061	-1.48651	-1.4435	-1.43939	-1.43526	-1.43111	-1.42695	-1.42278	-1.41859	-1.41438	-1.41017	-1.40594	-1.4017	-1.39745	-1.39319	-1.38892	-1.38464	-1.38035	-1.37605	-1.37174	-1.36742	-1.3631	-1.35877	-1.35443	-1.35008	-1.34573	-1.34137	-1.33701	-1.33264	-1.32827	-1.32389	-1.31951	-1.31512	-1.31073	-1.30633	-1.30193	-1.29753	-1.29312	-1.28871	-1.2843	-1.27988	-1.27546	-1.27104	-1.26661	-1.26217	-1.25774
1	118	TRUE	-0.163918	-0.166341	-0.168759	-0.17117	-0.173576	-0.175975	-0.178367	-0.180752	-0.18313	-0.1855	-0.187863	-0.190217	-0.192563	-0.194901	-0.197229	-0.199549	-0.20186	-0.204161	-0.206452	-0.208734	-0.211006	-0.213268	-0.215519	-0.21776	-0.21999	-0.22221	-0.224418	-0.226616	-0.228803	-0.230978	-0.21996	-0.222119	-0.224267	-0.226404	-0.228529	-0.230642	-0.232744	-0.234834	-0.236913	-0.238979	-0.241034	-0.243078	-0.245109	-0.233979	-0.235994	-0.237996	-0.239987
0	119	FALSE	-1.29075	-1.25908	-1.24778	-1.23651	-1.22528	-1.21408	-1.20292	-1.19179	-1.18589	-1.17484	-1.16382	-1.15284	-1.14191	-1.13101	-1.12015	-1.10934	-1.09856	-1.08783	-1.07714	-1.06649	-1.05589	-1.04532	-1.0348	-1.02433	-1.01389	-1.0035	-0.993145	-0.982836	-0.972569	-0.962343	-0.952158	-0.942014	-0.93191	-0.921847	-0.911823	-0.901838	-0.891892	-0.881984	-0.872114	-0.86228	-0.852482	-0.84272	-0.832993	-0.8233	-0.81364	-0.809208	-0.799609
1	119	TRUE	0.050162	0.0498025	0.0494614	0.0491385	0.0482483	0.0479622	0.0471099	0.0468601	0.0466281	0.0464137	0.0456315	0.0454525	0.0452907	0.0474244	0.0472941	0.0471805	0.0470834	0.0470027	0.0469381	0.0468895	0.046272	0.0462548	0.0462527	0.0462655	0.0479974	0.0497413	0.0497925	0.0498574	0.0499356	0.0523112	0.0524125	0.054225	0.0543482	0.0567716	0.0563294	0.0558997	0.0560648	0.0562397	0.0564242	0.0566177	0.0562357	0.0564462	0.0566645	0.0568899	0.0594003	0.059636	0.0592921
0	120	FALSE	0.662543	0.657514	0.652463	0.647398	0.642313	0.637205	0.632079	0.626936	0.621778	0.616604	0.611417	0.606217	0.601004	0.595781	0.590548	0.585305	0.580055	0.574797	0.569533	0.564265	0.558992	0.553716	0.548438	0.543165	0.537886	0.532608	0.527332	0.52206	0.516791	0.511527	0.506274	0.501023	0.49578	0.490545	0.48532	0.480106	0.474903	0.469712	0.464534	0.459371	0.454221	0.449088	0.44397	0.43887	0.433787	0.428723	0.423677
1	120	TRUE	0.130283	0.12953	0.128773	0.128011	0.127244	0.126473	0.125697	0.124918	0.124134	0.123345	0.122552	0.121755	0.120955	0.120151	0.119343	0.124286	0.123465	0.122641	0.121815	0.120985	0.120154	0.119318	0.118481	0.117641	0.1168	0.115956	0.115112	0.114266	0.113418	0.11257	0.111721	0.110872	0.110022	0.109172	0.108323	0.107474	0.106626	0.105778	0.104931	0.104086	0.103244	0.102402	0.101562	0.100725	0.0998899	0.0990579	0.0982291
0	122	FALSE	0.261007	0.255616	0.250271	0.244974	0.239724	0.234523	0.22937	0.224266	0.219212	0.214209	0.209255	0.204353	0.199503	0.194705	0.189959	0.185266	0.180626	0.17604	0.171508	0.167031	0.162608	0.158241	0.153928	0.149672	0.145471	0.141326	0.136765	0.132261	0.128286	0.124368	0.120507	0.116702	0.112954	0.108791	0.105157	0.101579	0.0980584	0.094594	0.0911858	0.0878337	0.0845373	0.0812965	0.0781109	0.0749802	0.071904	0.068882	0.0659136
1	122	TRUE	0.411584	0.410653	0.409558	0.408472	0.407568	0.406586	0.405699	0.404734	0.403863	0.403001	0.402146	0.401298	0.400458	0.399538	0.398712	0.397805	0.396992	0.396184	0.395383	0.394586	0.393795	0.393009	0.392228	0.391451	0.390592	0.389823	0.389058	0.388296	0.387537	0.38678	0.386026	0.385274	0.384436	0.383687	0.382939	0.382191	0.381443	0.380696	0.379948	0.379198	0.378362	0.37761	0.376855	0.376099	0.37534	0.374577	0.373811
0	123	FALSE	-0.78665	-0.784069	-0.781511	-0.778974	-0.776459	-0.773964	-0.771489	-0.769032	-0.766593	-0.764171	-0.761765	-0.759375	-0.756999	-0.754637	-0.752288	-0.749951	-0.747625	-0.74531	-0.743004	-0.740708	-0.738419	-0.736139	-0.733865	-0.731597	-0.729335	-0.727078	-0.724825	-0.722576	-0.72033	-0.718086	-0.715845	-0.713605	-0.711366	-0.709128	-0.70689	-0.704652	-0.702413	-0.700174	-0.697933	-0.695691	-0.693446	-0.6912	-0.688951	-0.6867	-0.684446	-0.682188	-0.679927
1	123	TRUE	-0.240307	-0.239837	-0.238643	-0.238206	-0.237772	-0.237367	-0.236977	-0.236603	-0.236243	-0.235898	-0.235568	-0.235252	-0.234938	-0.234637	-0.233623	-0.233349	-0.233101	-0.232854	-0.232631	-0.232408	-0.232209	-0.231261	-0.231085	-0.23092	-0.230754	-0.230597	-0.230464	-0.23034	-0.230213	-0.230094	-0.229998	-0.229909	-0.229829	-0.229756	-0.229691	-0.229633	-0.229569	-0.229524	-0.229486	-0.229452	-0.229425	-0.229389	-0.229359	-0.229345	-0.229323	-0.229304	-0.229302
0	124	FALSE	-0.539375	-0.538654	-0.53797	-0.537322	-0.53671	-0.536135	-0.535597	-0.535095	-0.53463	-0.534202	-0.529958	-0.529608	-0.529294	-0.529017	-0.528775	-0.524716	-0.524552	-0.524422	-0.524328	-0.524268	-0.524243	-0.524251	-0.524293	-0.524369	-0.524477	-0.524617	-0.524789	-0.524992	-0.525226	-0.525489	-0.525782	-0.526104	-0.526453	-0.52683	-0.527234	-0.527663	-0.528118	-0.528596	-0.529099	-0.529624	-0.530171	-0.530739	-0.531328	-0.531936	-0.532562	-0.533205	-0.533865
1	124	TRUE	0.0196739	0.0217838	0.0238818	0.0259672	0.0280398	0.030099	0.0321444	0.0341756	0.036192	0.0389296	0.0409142	0.0428828	0.0448347	0.0467694	0.0486866	0.0505857	0.0524661	0.0543274	0.056169	0.0579904	0.0597912	0.0615707	0.0633284	0.0650639	0.0667765	0.0684658	0.0701312	0.0717721	0.0733882	0.0749788	0.0765433	0.0780814	0.0795924	0.0810759	0.0825314	0.0839583	0.0853561	0.0867245	0.0880628	0.0893707	0.0906476	0.0918931	0.0931068	0.0942882	0.0954369	0.0972835	0.0983645
0	125	FALSE	0.46357	0.463606	0.463643	0.463679	0.463715	0.463749	0.463782	0.463813	0.463841	0.463866	0.463888	0.463905	0.463918	0.463927	0.463929	0.463926	0.463917	0.4639	0.463876	0.463844	0.463804	0.463755	0.463697	0.463629	0.46355	0.463461	0.463361	0.463249	0.463126	0.462989	0.46284	0.462678	0.462502	0.462311	0.462106	0.461886	0.46165	0.461399	0.461131	0.460847	0.460545	0.460226	0.459888	0.459533	0.459158	0.458764	0.458351
1	125	TRUE	-0.109968	-0.107045	-0.104156	-0.101301	-0.0984816	-0.0956979	-0.0929509	-0.0902413	-0.0875699	-0.0849375	-0.0823448	-0.0753993	-0.0684966	-0.0660307	-0.0636074	-0.0612271	-0.0588907	-0.0565986	-0.0543517	-0.0521503	-0.0499952	-0.0478868	-0.0458258	-0.0438126	-0.0418477	-0.0399316	-0.0380648	-0.0362476	-0.0344805	-0.0327638	-0.0265555	-0.0249428	-0.0233815	-0.0218718	-0.0160473	-0.0146433	-0.0132915	-0.0119921	-0.0107451	-0.00955068	-0.00840881	-0.00278304	-0.00174838	-0.000766197	0.000163624	0.00104122	0.00186675
0	126	FALSE	0.279361	0.279218	0.279071	0.278921	0.278767	0.278609	0.278448	0.278283	0.278113	0.27794	0.277763	0.277581	0.277395	0.277205	0.27701	0.276811	0.276608	0.276399	0.276187	0.275969	0.275747	0.27552	0.275287	0.27505	0.274808	0.274561	0.274309	0.274051	0.273787	0.273519	0.273244	0.272964	0.272678	0.272385	0.272087	0.271782	0.271471	0.271152	0.270827	0.270495	0.270155	0.269807	0.269452	0.269089	0.268717	0.268336	0.267946
1	126	TRUE	0.636833	0.632994	0.629154	0.625314	0.621474	0.617634	0.613793	0.609953	0.606112	0.602272	0.598431	0.594591	0.590751	0.586911	0.583071	0.579231	0.575391	0.571552	0.567712	0.563872	0.560033	0.56565	0.561803	0.557955	0.554106	0.550258	0.555905	0.552048	0.54819	0.544331	0.540471	0.536611	0.532749	0.528886	0.525022	0.521156	0.517289	0.51342	0.509549	0.505676	0.5018	0.497922	0.494042	0.490159	0.486273	0.482384	0.478491
0	127	FALSE	0.439673	0.436301	0.432876	0.429398	0.425866	0.422283	0.418647	0.414959	0.411221	0.407431	0.403591	0.399702	0.395764	0.391777	0.387742	0.38366	0.379532	0.375358	0.371139	0.366876	0.362568	0.358219	0.353828	0.349397	0.344925	0.340415	0.335867	0.331281	0.32666	0.322003	0.317312	0.312589	0.307833	0.303047	0.298231	0.293386	0.288513	0.283614	0.27869	0.273742	0.26877	0.263777	0.258762	0.253729	0.248677	0.243607	0.238522
1	127	TRUE	0.348674	0.349331	0.349982	0.350628	0.351268	0.351901	0.352529	0.35315	0.353764	0.354371	0.355032	0.355625	0.356211	0.356788	0.357358	0.35792	0.358473	0.359018	0.359554	0.360142	0.36066	0.361168	0.361667	0.362156	0.362635	0.363103	0.363561	0.364008	0.364443	0.364868	0.365281	0.365682	0.366071	0.366448	0.366812	0.367163	0.367501	0.367825	0.368136	0.368433	0.368715	0.368983	0.369236	0.369474	0.369696	0.369902	0.370093
0	128	FALSE	-1.62311	-1.61757	-1.61202	-1.60645	-1.60088	-1.59529	-1.58968	-1.58407	-1.57844	-1.5728	-1.56715	-1.56149	-1.55581	-1.55012	-1.54442	-1.53871	-1.53299	-1.52725	-1.5215	-1.51574	-1.50997	-1.50419	-1.4984	-1.49259	-1.48678	-1.48095	-1.47511	-1.46926	-1.4634	-1.45753	-1.45164	-1.44575	-1.43985	-1.43393	-1.42801	-1.42208	-1.41613	-1.41018	-1.40421	-1.39822	-1.39223	-1.38624	-1.38024	-1.37422	-1.3682	-1.36217	-1.35613
1	128	TRUE	0.481075	0.478193	0.481702	0.478752	0.47577	0.472756	0.472904	0.473054	0.469947	0.46681	0.463646	0.460451	0.457226	0.453973	0.450692	0.447382	0.444046	0.44068	0.437287	0.433871	0.440066	0.439778	0.436272	0.435963	0.432402	0.428815	0.425203	0.421566	0.424314	0.427051	0.423334	0.422813	0.419049	0.415264	0.414647	0.414041	0.410186	0.40631	0.402414	0.398498	0.394562	0.39061	0.386637	0.382647	0.378638	0.377827	0.373783
0	129	FALSE	0.172522	0.175287	0.178	0.180662	0.183271	0.185825	0.188325	0.190769	0.193156	0.195484	0.197754	0.199964	0.202112	0.204199	0.206222	0.208182	0.210076	0.211904	0.213666	0.215359	0.216984	0.218539	0.220024	0.221438	0.222779	0.224047	0.225241	0.226361	0.227405	0.228374	0.229266	0.230082	0.230819	0.231479	0.232061	0.232564	0.232987	0.233332	0.233597	0.233782	0.233887	0.233913	0.233859	0.233725	0.233512	0.233219	0.232847
1	129	TRUE	0.0383392	0.0378756	0.0374072	0.0369341	0.0364564	0.0359741	0.0354873	0.0349961	0.0345005	0.0340007	0.0334967	0.0329887	0.0324767	0.0319608	0.0314413	0.0309181	0.0303915	0.0298615	0.0293284	0.0287922	0.028253	0.0277111	0.0271665	0.0266196	0.0260704	0.025519	0.0249658	0.0244108	0.0238544	0.0232966	0.0227376	0.0221776	0.0216169	0.0210557	0.0204941	0.0199325	0.019371	0.0188098	0.0182492	0.0176893	0.0171306	0.0165731	0.0160171	0.0154629	0.0149106	0.0143605	0.013813
0	130	FALSE	0.140269	0.140513	0.140736	0.140937	0.141117	0.141276	0.141413	0.141529	0.141623	0.141697	0.141749	0.14178	0.141791	0.14178	0.141749	0.141697	0.141624	0.141531	0.141418	0.141283	0.141129	0.140954	0.14076	0.140545	0.14031	0.140056	0.139781	0.139487	0.139174	0.138841	0.138488	0.138117	0.137726	0.137316	0.136888	0.136441	0.135975	0.135491	0.134988	0.134467	0.133928	0.133372	0.132797	0.132205	0.131595	0.130968	0.130323
1	130	TRUE	-0.168469	-0.167513	-0.166565	-0.165624	-0.164691	-0.163765	-0.162845	-0.161933	-0.161027	-0.160128	-0.159235	-0.158348	-0.157468	-0.156593	-0.155724	-0.154861	-0.154003	-0.144981	-0.144143	-0.14331	-0.142482	-0.141659	-0.140841	-0.140027	-0.139218	-0.138414	-0.137614	-0.136818	-0.136027	-0.13524	-0.134457	-0.133678	-0.132903	-0.132132	-0.131365	-0.130602	-0.129842	-0.129086	-0.128334	-0.127586	-0.126842	-0.126101	-0.125364	-0.124631	-0.123901	-0.123175	-0.122453
0	131	FALSE	0.497378	0.498778	0.500172	0.501558	0.502936	0.504306	0.505666	0.507016	0.508356	0.509684	0.510999	0.512302	0.513591	0.514865	0.516124	0.517368	0.518594	0.519803	0.520994	0.522166	0.523319	0.524451	0.525563	0.526653	0.52772	0.528765	0.529786	0.530782	0.531754	0.532701	0.533621	0.534515	0.535382	0.536221	0.537033	0.537815	0.538568	0.539292	0.539986	0.540649	0.541281	0.541883	0.542452	0.54299	0.543496	0.543969	0.544409
1	131	TRUE	0.0794401	0.078201	0.0769608	0.0757197	0.074478	0.0732359	0.0719938	0.0707518	0.0697669	0.0685259	0.0675425	0.0663035	0.0653217	0.0640857	0.0633663	0.0621341	0.0609044	0.0596773	0.0584532	0.0572321	0.0560144	0.0548003	0.05359	0.0561208	0.054915	0.0539716	0.0527747	0.0555783	0.0543873	0.0534595	0.0522789	0.0511038	0.0499343	0.0490286	0.0478708	0.0469757	0.0458302	0.0446909	0.0435583	0.0424322	0.0415709	0.0407164	0.0401253	0.0392843	0.0381924	0.0371078	0.0360306
0	132	FALSE	0.126738	0.126888	0.126998	0.127065	0.12709	0.127071	0.127007	0.126897	0.126741	0.126537	0.126284	0.125982	0.125629	0.125223	0.124764	0.124251	0.123683	0.123058	0.122374	0.121632	0.120829	0.119964	0.119036	0.21648	0.215362	0.214176	0.212923	0.2116	0.210206	0.208739	0.207199	0.205584	0.203893	0.202124	0.200276	0.198348	0.196339	0.194247	0.192071	0.18981	0.187462	0.185027	0.182503	0.179889	0.177185	0.174389	0.1715
1	132	TRUE	0.0346001	0.0347777	0.0349482	0.0407931	0.0409451	0.0410894	0.0469394	0.0470661	0.0471856	0.0529946	0.058784	0.0588754	0.05896	0.0590377	0.0648044	0.0648648	0.0649188	0.0649659	0.0650065	0.065041	0.0650691	0.0650909	0.0651063	0.0651156	0.0651186	0.0651156	0.0651065	0.0707733	0.0707487	0.0707183	0.0706816	0.0706396	0.0705918	0.0705383	0.0704792	0.0704145	0.0703442	0.0702684	0.0758839	0.0757937	0.0756978	0.0755966	0.0754904	0.075379	0.0752624	0.0808531	0.0807222
0	133	FALSE	-2.02809	-2.02048	-2.01284	-2.00517	-1.99747	-1.98974	-1.98198	-1.97419	-1.96636	-1.9585	-1.95061	-1.94268	-1.93472	-1.92672	-1.91868	-1.91061	-1.90249	-1.89434	-1.88615	-1.87792	-1.86964	-1.86133	-1.85297	-1.84457	-1.83612	-1.82763	-1.8191	-1.81052	-1.80189	-1.79322	-1.7845	-1.77573	-1.76692	-1.75805	-1.74914	-1.74018	-1.73117	-1.7221	-1.71299	-1.70382	-1.69461	-1.68534	-1.67602	-1.66665	-1.65722	-1.64775	-1.63822
1	133	TRUE	-0.0845109	-0.0857549	-0.0869788	-0.0881823	-0.0893632	-0.0905248	-0.091665	-0.0927835	-0.0938783	-0.0949509	-0.0960028	-0.0970318	-0.0980379	-0.0990206	-0.099978	-0.100913	-0.101825	-0.102712	-0.103575	-0.104413	-0.105224	-0.106012	-0.106775	-0.107512	-0.108222	-0.108908	-0.109568	-0.110202	-0.110809	-0.11139	-0.111945	-0.112472	-0.112973	-0.113447	-0.113892	-0.114312	-0.114705	-0.11507	-0.115405	-0.115715	-0.115998	-0.11625	-0.116477	-0.116676	-0.116845	-0.116988	-0.117103
0	134	FALSE	-0.696539	-0.694281	-0.69202	-0.689755	-0.687485	-0.685211	-0.682932	-0.680648	-0.678358	-0.676063	-0.673763	-0.671457	-0.669144	-0.665391	-0.663068	-0.660738	-0.658401	-0.656057	-0.653707	-0.651349	-0.647549	-0.645178	-0.642799	-0.640412	-0.638017	-0.635614	-0.633203	-0.62935	-0.626924	-0.62449	-0.620612	-0.618162	-0.615703	-0.613236	-0.61076	-0.608275	-0.605781	-0.603279	-0.600767	-0.598247	-0.595717	-0.593179	-0.590632	-0.588076	-0.585511	-0.582936	-0.580353
1	134	TRUE	-0.836273	-0.833218	-0.830155	-0.827081	-0.823998	-0.820906	-0.817803	-0.814691	-0.81157	-0.808439	-0.805298	-0.802148	-0.798988	-0.795818	-0.792639	-0.789451	-0.786253	-0.783046	-0.77983	-0.776605	-0.773371	-0.770128	-0.766877	-0.763617	-0.760349	-0.757073	-0.753788	-0.749297	-0.745998	-0.742692	-0.739379	-0.736059	-0.732732	-0.729398	-0.726058	-0.721509	-0.718158	-0.714801	-0.711439	-0.708071	-0.704698	-0.701321	-0.697939	-0.694552	-0.691161	-0.686563	-0.683166
0	135	FALSE	0.326976	0.322579	0.318189	0.313808	0.309434	0.305069	0.300711	0.296362	0.292021	0.287688	0.283363	0.279046	0.274738	0.270438	0.266146	0.261863	0.257589	0.253323	0.249066	0.244819	0.24058	0.23635	0.23213	0.227919	0.223718	0.219527	0.215345	0.211174	0.207012	0.202862	0.198721	0.194592	0.190473	0.186366	0.18227	0.178186	0.174113	0.170052	0.166004	0.161968	0.157945	0.153934	0.149937	0.145953	0.141983	0.138027	0.134085
1	135	TRUE	0.059072	0.0585343	0.0579833	0.0574189	0.056841	0.0562498	0.0556451	0.0550269	0.0543953	0.0537502	0.0530917	0.0524197	0.0517344	0.0510356	0.0503235	0.0495981	0.0508314	0.0500775	0.0493105	0.0485304	0.0477373	0.0469317	0.046113	0.0452815	0.0444374	0.0435808	0.0427118	0.0418305	0.0409371	0.0400316	0.0391142	0.0381851	0.0372444	0.0362923	0.0353288	0.0343542	0.0333686	0.0323721	0.0313651	0.0303475	0.0293197	0.0282818	0.027234	0.0261766	0.0251096	0.0240334	0.0229481
0	136	FALSE	-0.283681	-0.285114	-0.286539	-0.287956	-0.289367	-0.290771	-0.292168	-0.293559	-0.294944	-0.296323	-0.297697	-0.299065	-0.300427	-0.301785	-0.303137	-0.304484	-0.304834	-0.306171	-0.307504	-0.308831	-0.310153	-0.31147	-0.312782	-0.314088	-0.315388	-0.316683	-0.317971	-0.319254	-0.32053	-0.321799	-0.323062	-0.324317	-0.325564	-0.326804	-0.328035	-0.329257	-0.33047	-0.331674	-0.332868	-0.334051	-0.335223	-0.336383	-0.337532	-0.338668	-0.339791	-0.3409	-0.341995
1	136	TRUE	0.0715325	0.0704718	0.0694221	0.0683833	0.0673556	0.0663387	0.0653328	0.0643378	0.0633537	0.0623805	0.0614182	0.0604667	0.0595261	0.0585963	0.0576772	0.0567688	0.0558714	0.0549847	0.0541088	0.0538067	0.0529518	0.0521076	0.0512741	0.0504514	0.0496393	0.0488378	0.0480469	0.0472665	0.0464966	0.045737	0.0449879	0.0442489	0.0435203	0.0428018	0.0420933	0.0413948	0.0407061	0.0400272	0.0393579	0.0386981	0.0380476	0.0374063	0.036774	0.0367089	0.0366581	0.0360512	0.0354526
0	137	FALSE	0.576276	0.572878	0.569486	0.566101	0.562722	0.55935	0.555984	0.552624	0.549271	0.545924	0.542583	0.539247	0.535917	0.532591	0.529271	0.525956	0.522644	0.519336	0.516032	0.512731	0.509432	0.506135	0.50284	0.499545	0.496251	0.492957	0.489662	0.486366	0.483067	0.479766	0.476461	0.473152	0.469839	0.466519	0.463193	0.45986	0.456555	0.453205	0.449846	0.446476	0.443095	0.439703	0.436297	0.432878	0.429445	0.425996	0.422531
1	137	TRUE	-0.567645	-0.56772	-0.567749	-0.567733	-0.567671	-0.567551	-0.567396	-0.567193	-0.566939	-0.566637	-0.566294	-0.565904	-0.565461	-0.564972	-0.56444	-0.563861	-0.563235	-0.562561	-0.561841	-0.561072	-0.560247	-0.559384	-0.558475	-0.557513	-0.556509	-0.555459	-0.554361	-0.553218	-0.552023	-0.550787	-0.549504	-0.548176	-0.546792	-0.545373	-0.543909	-0.542399	-0.54084	-0.539227	-0.537584	-0.535897	-0.534157	-0.532383	-0.530567	-0.528707	-0.5268	-0.524851	-0.522861
0	138	FALSE	-0.21785	-0.213364	-0.208902	-0.204463	-0.200047	-0.195654	-0.191283	-0.186934	-0.182607	-0.1783	-0.174015	-0.16975	-0.165504	-0.156995	-0.152791	-0.148606	-0.140136	-0.13599	-0.13186	-0.127747	-0.123649	-0.119567	-0.1155	-0.111446	-0.107407	-0.10338	-0.0993661	-0.0953643	-0.091374	-0.0873948	-0.0834261	-0.0794674	-0.0755182	-0.0715781	-0.0676466	-0.0637232	-0.0598075	-0.0558991	-0.0519974	-0.0481022	-0.044213	-0.0403294	-0.0364512	0.0376551	0.0414646	0.0452698	0.0490711
1	138	TRUE	-0.531755	-0.529489	-0.527224	-0.524958	-0.522692	-0.520425	-0.518158	-0.515889	-0.513621	-0.511351	-0.5086	-0.505848	-0.503577	-0.501305	-0.499032	-0.496758	-0.494003	-0.491727	-0.489451	-0.487174	-0.484896	-0.482617	-0.480337	-0.477091	-0.47433	-0.472049	-0.469768	-0.467486	-0.464722	-0.461957	-0.459675	-0.457393	-0.454628	-0.452347	-0.450065	-0.447784	-0.445503	-0.443222	-0.440942	-0.438663	-0.435902	-0.425778	-0.423509	-0.421241	-0.418975	-0.416711	-0.414448
0	139	FALSE	-1.06198	-1.0582	-1.05442	-1.05064	-1.04686	-1.04307	-1.03929	-1.0355	-1.0317	-1.0279	-1.0241	-1.02028	-1.01646	-1.01263	-1.00878	-1.00493	-1.00106	-0.997175	-0.993278	-0.989364	-0.985433	-0.981484	-0.977515	-0.973526	-0.969516	-0.965483	-0.961426	-0.957344	-0.953237	-0.949103	-0.94494	-0.940749	-0.936529	-0.932277	-0.927993	-0.923676	-0.919325	-0.91494	-0.910518	-0.90606	-0.901564	-0.897029	-0.892454	-0.887839	-0.883183	-0.878484	-0.873743
1	139	TRUE	0.0205206	0.0210087	0.0214894	0.0219627	0.0224285	0.022887	0.0233381	0.023782	0.0246359	0.0250644	0.0254857	0.0261552	0.0265623	0.0269624	0.0273556	0.0277419	0.0281214	0.0284942	0.0288604	0.02922	0.0295731	0.0305925	0.0309319	0.031265	0.0315919	0.0319126	0.0322274	0.0325361	0.032839	0.033136	0.0334272	0.0337126	0.0342472	0.0345213	0.0347898	0.0350528	0.0353103	0.0355624	0.0358092	0.0363054	0.0367966	0.0370272	0.0372527	0.0374729	0.037688	0.0378981	0.0381031
0	140	FALSE	-0.825141	-0.825388	-0.825618	-0.825831	-0.826025	-0.826201	-0.826358	-0.826495	-0.826612	-0.826708	-0.826783	-0.826837	-0.826869	-0.826879	-0.826866	-0.826829	-0.826769	-0.826685	-0.826577	-0.826444	-0.826285	-0.826101	-0.825891	-0.825655	-0.825392	-0.825101	-0.824783	-0.824438	-0.824064	-0.823661	-0.82323	-0.82277	-0.822279	-0.821759	-0.821209	-0.820628	-0.820016	-0.819373	-0.818699	-0.817992	-0.817254	-0.816483	-0.81568	-0.814844	-0.813974	-0.813071	-0.812135
1	140	TRUE	-0.0799135	-0.0782275	-0.0765436	-0.0748619	-0.0731823	-0.0715049	-0.0698297	-0.0681564	-0.0664852	-0.0648161	-0.0631488	-0.0614833	-0.0598196	-0.0581578	-0.0564975	-0.0548388	-0.0531817	-0.0515262	-0.049872	-0.0482192	-0.0465676	-0.0449173	-0.0432682	-0.0416201	-0.0399732	-0.0383271	-0.0366821	-0.0350379	-0.0333946	-0.0317521	-0.0301103	-0.0284693	-0.0268289	-0.0251892	-0.0235501	-0.0219116	-0.0202737	-0.0186363	-0.0169995	-0.0153633	-0.0137276	-0.0120925	-0.0104579	-0.00882395	-0.00719058	-0.00555786	-0.00392575
0	142	FALSE	3.11592	3.09546	3.07498	3.05449	3.03398	3.01347	2.99294	2.97242	2.95188	2.93135	2.91082	2.8903	2.86978	2.84927	2.82877	2.80829	2.78782	2.76738	2.74695	2.72655	2.70617	2.68583	2.66551	2.64523	2.62499	2.60479	2.58462	2.56451	2.54444	2.52442	2.50445	2.48453	2.46467	2.44487	2.42513	2.40546	2.38585	2.36631	2.34684	2.32744	2.30812	2.28888	2.26971	2.25063	2.23163	2.21272	2.19427
1	142	TRUE	0.487879	0.485719	0.483571	0.481434	0.479307	0.477191	0.475085	0.472989	0.470903	0.468827	0.466759	0.4647	0.46265	0.460608	0.458573	0.456546	0.454526	0.452513	0.450505	0.448503	0.446507	0.444515	0.442527	0.440543	0.438563	0.436585	0.43461	0.432636	0.430664	0.428693	0.426722	0.424751	0.422779	0.420806	0.418832	0.416856	0.414877	0.412895	0.410909	0.40892	0.406926	0.404943	0.402939	0.400929	0.398914	0.396891	0.394862
0	143	FALSE	0.393864	0.395148	0.396417	0.39767	0.398905	0.400122	0.40132	0.402497	0.403653	0.404786	0.405896	0.406982	0.408043	0.409078	0.410087	0.411067	0.412019	0.419839	0.420729	0.421589	0.422417	0.423213	0.423977	0.424707	0.425404	0.426066	0.426694	0.427287	0.427844	0.428366	0.42885	0.429299	0.42971	0.430084	0.430421	0.43072	0.430982	0.431205	0.43139	0.431537	0.431646	0.431717	0.431749	0.431743	0.431698	0.431615	0.431493
1	143	TRUE	-0.0498934	-0.0501287	-0.050371	-0.05062	-0.0508757	-0.0511377	-0.0514059	-0.0509822	-0.0512625	-0.0515485	-0.0518399	-0.0521365	-0.0524381	-0.0520486	-0.05236	-0.0526758	-0.0529958	-0.0533197	-0.0536474	-0.0539787	-0.0543132	-0.0546508	-0.0542925	-0.0546359	-0.0549816	-0.0553295	-0.0556792	-0.0560306	-0.0563834	-0.0567374	-0.0570923	-0.0574479	-0.0578039	-0.0581601	-0.0585163	-0.0588723	-0.0592277	-0.0595824	-0.0599362	-0.0602888	-0.0606399	-0.0609894	-0.061337	-0.060984	-0.0606315	-0.0609727	-0.0613111
0	144	FALSE	0.0271523	0.0263058	0.0254132	0.0244758	0.0234955	0.0224738	0.0214122	0.0203125	0.0191762	0.0180049	0.0168003	0.0155639	0.027671	0.0263679	0.0250377	0.0236821	0.0223025	0.0209005	0.0194776	0.0180353	0.016575	0.0150982	0.0136064	0.0121009	0.0105832	0.00905458	0.00751639	0.00596994	0.00441654	0.00285745	0.00129391	-0.000272877	0.0115876	0.0100099	0.00843248	0.00685637	0.00528269	0.00371249	0.00214678	0.000586606	-0.000967095	-0.00251338	-0.00405134	-0.0055801	-0.00709882	-0.00860667	-0.0101029
1	144	TRUE	-0.179093	-0.180825	-0.182551	-0.184269	-0.18598	-0.187682	-0.189376	-0.19106	-0.192735	-0.1944	-0.196054	-0.197697	-0.199329	-0.200948	-0.202555	-0.204148	-0.205728	-0.207293	-0.208843	-0.210378	-0.211897	-0.213399	-0.214884	-0.216352	-0.217801	-0.219231	-0.215321	-0.216714	-0.218087	-0.219439	-0.220769	-0.222077	-0.223361	-0.224622	-0.225859	-0.227071	-0.228258	-0.229418	-0.230553	-0.23166	-0.23274	-0.233792	-0.234816	-0.23581	-0.236775	-0.23771	-0.238615
0	146	FALSE	0.762517	0.757958	0.753355	0.748708	0.744244	0.73951	0.734732	0.729911	0.725048	0.720143	0.715197	0.71021	0.705182	0.700115	0.695008	0.689862	0.684677	0.679455	0.674196	0.668899	0.663567	0.686779	0.681349	0.675884	0.670385	0.664853	0.659289	0.653692	0.648064	0.642405	0.636715	0.630996	0.625248	0.619472	0.613667	0.607836	0.601977	0.596093	0.590184	0.584249	0.578291	0.572309	0.566304	0.560277	0.554453	0.548383	0.542293
1	146	TRUE	0.298297	0.297462	0.30466	0.303802	0.303	0.302127	0.301247	0.300357	0.29946	0.298554	0.297639	0.296716	0.295783	0.294842	0.293891	0.292931	0.291961	0.290981	0.289992	0.288993	0.287983	0.286963	0.293954	0.292906	0.291847	0.290777	0.289696	0.288605	0.287502	0.286389	0.285263	0.28419	0.283105	0.281945	0.280774	0.279591	0.278458	0.277252	0.276096	0.274865	0.273622	0.272367	0.271163	0.269884	0.268592	0.267288	0.265971
0	147	FALSE	-0.551367	-0.550945	-0.550477	-0.549964	-0.549404	-0.5488	-0.548152	-0.547459	-0.546723	-0.545944	-0.545123	-0.54426	-0.543356	-0.542413	-0.54143	-0.540408	-0.539349	-0.538253	-0.537121	-0.535953	-0.534752	-0.533517	-0.532249	-0.53095	-0.529621	-0.528262	-0.526875	-0.52546	-0.524019	-0.522553	-0.521063	-0.519549	-0.518013	-0.516457	-0.514881	-0.513286	-0.511673	-0.510045	-0.508401	-0.506744	-0.505073	-0.503392	-0.501699	-0.499998	-0.498289	-0.496573	-0.494851
1	147	TRUE	0.414472	0.412176	0.409888	0.407608	0.405338	0.403076	0.400823	0.398579	0.396344	0.394118	0.391901	0.389692	0.387492	0.385301	0.383118	0.380944	0.378779	0.376622	0.374474	0.372334	0.370202	0.368078	0.365962	0.363855	0.361755	0.359663	0.357579	0.355502	0.353433	0.351371	0.349317	0.34727	0.345231	0.343198	0.341173	0.339155	0.337143	0.335139	0.333142	0.331152	0.329169	0.327193	0.325223	0.32326	0.321305	0.319356	0.317414
0	148	FALSE	0.151998	0.15166	0.151328	0.151001	0.15068	0.150363	0.15005	0.149741	0.149436	0.149133	0.148834	0.148536	0.14824	0.147944	0.14765	0.147355	0.147059	0.146762	0.146464	0.146162	0.145858	0.145549	0.145237	0.144919	0.144595	0.144265	0.143928	0.143582	0.143229	0.142866	0.142492	0.142109	0.141713	0.141306	0.140886	0.140452	0.140004	0.139542	0.139063	0.138569	0.138058	0.137529	0.136983	0.136418	0.135833	0.135229	0.134604
1	148	TRUE	0.0998712	0.0982976	0.0967287	0.0951648	0.0936058	0.0920518	0.0905029	0.0889594	0.0874213	0.0858886	0.0843616	0.0828403	0.0813249	0.0798155	0.0783121	0.076815	0.0753242	0.0738399	0.0723623	0.08046	0.0789895	0.0775261	0.0760697	0.0746206	0.0731789	0.0717445	0.0703179	0.0688989	0.0674878	0.0660847	0.0646897	0.0633028	0.0619241	0.0605538	0.0687456	0.0673858	0.0660345	0.0646921	0.0633584	0.0620336	0.0607176	0.0594105	0.0581124	0.0568233	0.0555432	0.0542721	0.0530101
0	149	FALSE	1.38706	1.38218	1.37732	1.37249	1.36768	1.36289	1.35813	1.35339	1.34867	1.34398	1.33931	1.33467	1.33004	1.32544	1.32087	1.31631	1.31178	1.30727	1.30278	1.29831	1.29387	1.28945	1.28504	1.28066	1.2763	1.27196	1.26764	1.26334	1.25906	1.2548	1.25056	1.24633	1.24213	1.23794	1.23377	1.22962	1.22548	1.22136	1.21726	1.21317	1.2091	1.20504	1.201	1.19697	1.19295	1.18895	1.18496
1	149	TRUE	-0.12218	-0.122664	-0.123146	-0.123625	-0.124103	-0.12458	-0.125056	-0.125531	-0.126007	-0.126483	-0.126959	-0.127437	-0.113354	-0.11385	-0.114349	-0.114851	-0.115355	-0.115862	-0.116373	-0.116887	-0.102843	-0.103381	-0.103923	-0.104471	-0.105023	-0.10558	-0.106142	-0.10671	-0.107283	-0.107862	-0.108446	-0.109037	-0.109633	-0.110235	-0.110842	-0.111456	-0.112075	-0.1127	-0.113331	-0.113967	-0.114609	-0.115256	-0.115908	-0.116565	-0.117227	-0.117893	-0.118564
0	150	FALSE	-0.206763	-0.201207	-0.19565	-0.190093	-0.184537	-0.178983	-0.17343	-0.167881	-0.162334	-0.156791	-0.151253	-0.14572	-0.140192	-0.13467	-0.129155	-0.123646	-0.118144	-0.112651	-0.107165	-0.101688	-0.0962196	-0.0907605	-0.085311	-0.0798713	-0.0744417	-0.0690226	-0.0636142	-0.0582168	-0.0528306	-0.0474558	-0.0420927	-0.0367415	-0.0314023	-0.0260754	-0.0207609	-0.015459	-0.0101699	-0.00489373	0.000369357	0.0056192	0.0115582	0.01678	0.021988	0.0271821	0.0323623	0.0375283	0.04268
1	150	TRUE	0.198258	0.197025	0.195792	0.19456	0.193327	0.192095	0.190952	0.18972	0.188487	0.187255	0.186023	0.184792	0.183561	0.18233	0.1811	0.17987	0.17873	0.177502	0.176274	0.175327	0.1741	0.173154	0.171929	0.170705	0.169482	0.16835	0.167129	0.165909	0.164691	0.163475	0.162259	0.161046	0.159834	0.158803	0.157594	0.156387	0.155182	0.153979	0.152779	0.15158	0.150383	0.149189	0.147997	0.146808	0.145621	0.144526	0.143434
0	151	FALSE	-0.871552	-0.86996	-0.868332	-0.86667	-0.864972	-0.863238	-0.861468	-0.859661	-0.857819	-0.85594	-0.84668	-0.84474	-0.842763	-0.840749	-0.838697	-0.836608	-0.827181	-0.825029	-0.822839	-0.82061	-0.818344	-0.81604	-0.813697	-0.811315	-0.808895	-0.806437	-0.803939	-0.801404	-0.798829	-0.796216	-0.793564	-0.790873	-0.788144	-0.785376	-0.78257	-0.779724	-0.77684	-0.773918	-0.770957	-0.767958	-0.764921	-0.761845	-0.758731	-0.755579	-0.752389	-0.749161	-0.745896
1	151	TRUE	-0.252588	-0.252602	-0.252601	-0.252586	-0.252558	-0.252515	-0.252458	-0.252386	-0.252301	-0.252202	-0.252089	-0.251962	-0.24983	-0.249679	-0.249514	-0.249336	-0.249143	-0.248938	-0.248718	-0.248486	-0.24824	-0.247981	-0.247709	-0.247424	-0.247126	-0.246816	-0.246492	-0.246156	-0.245809	-0.245448	-0.245076	-0.243692	-0.243297	-0.242891	-0.242473	-0.242043	-0.241602	-0.24115	-0.240686	-0.240212	-0.239727	-0.239231	-0.238724	-0.238208	-0.237681	-0.237144	-0.236596
[truncated: 3,453 more columns]

## Sheet: panel C
	subject	0	1	2	3	4	5	6	7	8	9	10	11	12	13	14	15	16	17	18	19	20	21	22	23	24	25	26	27	28	29	30	31	32	33	34	35	36	37	38	39	40	41	42	43	44	45	46	47
0	102	0.0242319	0.0222398	0.0202553	0.0182784	0.016309	0.0143474	0.0142087	0.0140875	0.012147	0.0102146	0.00829014	0.00819982	0.00811664	0.00621475	0.0043213	0.00426238	0.00238508	0.00232725	0.000466592	-0.00138501	-0.00322744	-0.00506054	-0.00688418	-0.00869824	-0.0105026	-0.012297	-0.0122661	-0.0140415	-0.0158065	-0.017561	-0.0174943	-0.0192286	-0.020952	-0.0172124	-0.0189168	-0.0169849	-0.0186687	-0.0185256	-0.0201872	-0.0218369	-0.0234746	-0.0184484	-0.0200683	-0.0216758	-0.0232709	-0.0248536	-0.0264236	-0.0279809
0	103	-0.010955	-0.0115169	-0.01209	-0.012079	-0.0120821	-0.0120991	-0.012728	-0.0127725	-0.0128309	-0.0129029	-0.0147852	-0.015091	-0.0158023	-0.0159281	-0.0160673	-0.0162199	-0.0169845	-0.0171633	-0.0173552	-0.0175602	-0.0183787	-0.0186093	-0.0188527	-0.0191088	-0.0193776	-0.019659	-0.0199528	-0.0202591	-0.0201869	-0.0205184	-0.0210687	-0.0214248	-0.0217928	-0.0221727	-0.0225642	-0.0229673	-0.0233819	-0.0244066	-0.0248435	-0.0270903	-0.0275485	-0.0286182	-0.0290977	-0.0295878	-0.0300883	-0.0311978	-0.0317184	-0.032249
0	104	-0.128217	-0.129195	-0.130173	-0.130757	-0.131735	-0.132712	-0.133689	-0.134664	-0.135638	-0.136215	-0.136395	-0.136969	-0.137541	-0.138503	-0.139461	-0.140415	-0.141366	-0.142311	-0.143252	-0.144188	-0.145119	-0.146043	-0.146569	-0.147084	-0.14799	-0.148889	-0.14978	-0.150664	-0.15154	-0.151527	-0.152388	-0.152451	-0.153294	-0.153732	-0.154557	-0.155372	-0.156177	-0.156971	-0.157361	-0.158134	-0.158897	-0.159648	-0.160388	-0.161116	-0.161832	-0.162144	-0.162439	-0.163119
0	105	-0.357204	-0.355968	-0.354729	-0.353487	-0.352243	-0.350996	-0.349747	-0.348496	-0.347242	-0.345987	-0.34473	-0.343471	-0.342211	-0.340949	-0.339686	-0.338422	-0.337156	-0.33589	-0.334623	-0.333355	-0.332087	-0.330818	-0.329549	-0.32828	-0.327011	-0.325742	-0.324474	-0.323206	-0.321938	-0.320671	-0.319405	-0.318141	-0.316877	-0.315615	-0.314354	-0.313094	-0.311837	-0.310582	-0.309329	-0.308078	-0.306829	-0.305583	-0.30434	-0.3031	-0.301863	-0.300629	-0.299399	-0.298172
0	106	0.270108	0.27068	0.271283	0.271898	0.272543	0.273199	0.273874	0.274577	0.27529	0.276019	0.276785	0.277548	0.278327	0.279122	0.27993	0.280763	0.281599	0.282458	0.283329	0.284202	0.285086	0.28598	0.286885	0.287799	0.288721	0.289651	0.290589	0.291552	0.292513	0.293469	0.29444	0.295416	0.296386	0.297359	0.298336	0.299342	0.300331	0.301312	0.302293	0.303275	0.304265	0.305244	0.306222	0.307197	0.30817	0.309139	0.310104	0.311065
0	107	-0.0841684	-0.0846364	-0.0813059	-0.0817654	-0.0822186	-0.0826653	-0.0831053	-0.0835384	-0.0801716	-0.0805936	-0.0810084	-0.0814157	-0.0818155	-0.0784118	-0.0787996	-0.0791799	-0.0795525	-0.0761216	-0.0764823	-0.0768355	-0.0771812	-0.0775197	-0.0778509	-0.0781751	-0.0784924	-0.0788029	-0.0791069	-0.0794045	-0.0796959	-0.0761856	-0.0764687	-0.0767464	-0.0770189	-0.0772865	-0.0775495	-0.077808	-0.0780625	-0.0783131	-0.0785602	-0.078804	-0.0790449	-0.0792831	-0.0795189	-0.0797526	-0.0799844	-0.0802147	-0.0804437	-0.0806716
0	108	0.212503	0.211462	0.210419	0.209374	0.20833	0.207616	0.206569	0.205523	0.204476	0.20343	0.202384	0.201339	0.200294	0.19925	0.198538	0.197825	0.196783	0.195741	0.194701	0.193661	0.192623	0.191586	0.19055	0.189515	0.188481	0.187449	0.186748	0.185716	0.184685	0.183654	0.182624	0.181595	0.180566	0.179537	0.178507	0.177478	0.176448	0.175417	0.174385	0.173353	0.172319	0.171284	0.170247	0.169208	0.168167	0.167123	0.166408	0.165358
0	109	-0.266728	-0.26564	-0.264557	-0.263479	-0.262405	-0.257083	-0.256022	-0.254967	-0.253919	-0.252877	-0.251842	-0.250814	-0.249792	-0.248779	-0.247773	-0.246775	-0.245785	-0.244804	-0.243831	-0.242868	-0.237671	-0.232472	-0.23154	-0.230618	-0.225448	-0.224548	-0.223657	-0.218544	-0.217677	-0.21682	-0.215974	-0.215139	-0.214315	-0.213502	-0.208446	-0.207658	-0.206881	-0.206116	-0.205362	-0.204619	-0.203888	-0.203169	-0.198204	-0.197509	-0.192571	-0.187644	-0.182744	-0.1821
0	110	0.956582	0.955592	0.962339	0.961292	0.960219	0.959122	0.957998	0.95685	0.955675	0.954474	0.953247	0.951994	0.950714	0.949407	0.948073	0.946713	0.945325	0.943909	0.942466	0.940995	0.939496	0.937968	0.936413	0.934829	0.933216	0.931574	0.929904	0.928204	0.926475	0.924716	0.922928	0.92111	0.919262	0.917384	0.915476	0.913538	0.911569	0.90957	0.907539	0.905479	0.903387	0.901264	0.899109	0.896924	0.894707	0.892458	0.890178	0.887867
0	111	1.10351	1.09933	1.09515	1.09096	1.08676	1.08256	1.07835	1.07413	1.06992	1.06569	1.06147	1.05723	1.053	1.04876	1.04452	1.04027	1.03603	1.03177	1.02752	1.02327	1.01901	1.01476	1.0105	1.00624	1.00198	0.997725	0.993468	0.989211	0.984956	0.980702	0.97645	0.972201	0.967953	0.963709	0.959467	0.955229	0.950994	0.946764	0.942537	0.938315	0.934098	0.929886	0.92568	0.921479	0.917284	0.913095	0.908912	0.904736
0	112	-0.455821	-0.45109	-0.450495	-0.44576	-0.445156	-0.440406	-0.439793	-0.43503	-0.430263	-0.42964	-0.424874	-0.424244	-0.423611	-0.422974	-0.418199	-0.417557	-0.416911	-0.416262	-0.41561	-0.414955	-0.410151	-0.405353	-0.404694	-0.404033	-0.403369	-0.402702	-0.402033	-0.401362	-0.396543	-0.395869	-0.395194	-0.390375	-0.389697	-0.389016	-0.388334	-0.387649	-0.386961	-0.386272	-0.38558	-0.384886	-0.384189	-0.383489	-0.382788	-0.382083	-0.381376	-0.380665	-0.379952	-0.379236
0	113	0.0572338	0.0568293	0.0564169	0.0559964	0.0555677	0.0551307	0.0546854	0.0542317	0.0537694	0.0532987	0.0578474	0.0573563	0.0568564	0.0563478	0.0558303	0.055309	0.0547737	0.0542295	0.0536764	0.0531194	0.0525483	0.0519682	0.0513792	0.0507863	0.0501795	0.0495637	0.0489391	0.0483056	0.0476634	0.0470175	0.0463578	0.0456896	0.0450128	0.0443326	0.043639	0.0429371	0.042227	0.0415088	0.0407825	0.0400484	0.0393065	0.04365	0.0428898	0.0421221	0.0413472	0.040565	0.0397759	0.0389798
0	114	0.17482	0.17276	0.170692	0.168617	0.166532	0.16444	0.162341	0.160236	0.158123	0.156006	0.153881	0.15175	0.149614	0.147473	0.145327	0.143177	0.141023	0.138866	0.136705	0.13454	0.132373	0.130205	0.128034	0.12586	0.123685	0.12151	0.119333	0.117155	0.114976	0.112797	0.110618	0.108441	0.113764	0.11158	0.109398	0.107216	0.105037	0.102859	0.100683	0.0985088	0.0963388	0.09417	0.092004	0.0898411	0.0876815	0.0855254	0.0833731	0.0812247
0	115	0.139491	0.138597	0.137693	0.136779	0.135854	0.13492	0.133977	0.133025	0.132065	0.131096	0.130118	0.129134	0.128141	0.127142	0.126135	0.125122	0.124102	0.123076	0.122299	0.121261	0.120217	0.119167	0.118113	0.117053	0.115987	0.114917	0.113842	0.112763	0.111932	0.110843	0.110005	0.108907	0.108313	0.107205	0.106094	0.104978	0.103857	0.102732	0.101603	0.10047	0.0993318	0.0981894	0.0970424	0.0958909	0.0947348	0.0938287	0.0926629	0.0917469
0	116	0.0395194	0.0398062	0.0400873	0.0395865	0.0390776	0.0393342	0.0388089	0.0382757	0.0377345	0.0379575	0.0374003	0.0368354	0.0362628	0.0364582	0.0358701	0.0360451	0.0354417	0.034831	0.0349836	0.0351287	0.0352664	0.0346261	0.0339788	0.0333247	0.0334358	0.0327679	0.0320935	0.0314127	0.0307254	0.0300319	0.0293323	0.0286266	0.027915	0.0282862	0.0283379	0.0283788	0.0276433	0.0276731	0.0269267	0.0261753	0.0254189	0.0246577	0.0238918	0.0231213	0.0223465	0.0218817	0.021098	0.0203103
0	117	0.0830668	0.0827392	0.0824136	0.0820899	0.0817678	0.0814477	0.0811293	0.0808125	0.0804972	0.0801834	0.0798709	0.0795597	0.0792498	0.078941	0.0786333	0.0783264	0.0780205	0.0777156	0.0774113	0.0771079	0.0768052	0.076503	0.0762012	0.0759001	0.0755992	0.0752987	0.0749986	0.0746987	0.0743989	0.0740992	0.0737996	0.0734998	0.0734213	0.0731211	0.0728206	0.07252	0.0722193	0.0719183	0.0716169	0.0713153	0.0710133	0.0707109	0.0704082	0.070105	0.0700222	0.0697175	0.0694123	0.0691067
0	118	-0.500823	-0.501599	-0.502367	-0.49328	-0.494035	-0.494781	-0.495518	-0.496246	-0.496964	-0.497674	-0.498374	-0.499066	-0.499748	-0.50042	-0.501084	-0.501737	-0.502381	-0.503016	-0.503641	-0.504257	-0.504863	-0.505459	-0.506046	-0.506622	-0.50719	-0.507747	-0.508295	-0.508833	-0.509362	-0.50988	-0.500544	-0.501049	-0.501543	-0.502028	-0.502503	-0.502969	-0.503425	-0.503871	-0.504308	-0.504735	-0.505152	-0.50556	-0.505958	-0.496525	-0.496909	-0.497282	-0.497645	-0.497999
0	119	-0.0856263	-0.0827426	-0.0819049	-0.081054	-0.0807164	-0.0798395	-0.0794749	-0.0785726	-0.0781842	-0.0772573	-0.0768447	-0.0758939	-0.0749317	-0.0719105	-0.0709283	-0.0699351	-0.0689313	-0.0679171	-0.0668926	-0.0658581	-0.065339	-0.0642849	-0.0632214	-0.0621488	-0.0595355	-0.0569157	-0.0558215	-0.0547192	-0.0536092	-0.0504385	-0.0493162	-0.04666	-0.0455261	-0.042329	-0.0417114	-0.0410865	-0.0399309	-0.0387703	-0.0376049	-0.0364352	-0.0357864	-0.0346086	-0.0334274	-0.0322432	-0.0290088	-0.0283482	-0.0276852	-0.0264941
0	120	0.183509	0.182329	0.181142	0.179949	0.178751	0.177546	0.176335	0.17512	0.173898	0.172671	0.171439	0.170202	0.16896	0.167714	0.166463	0.170388	0.169124	0.167857	0.166587	0.165313	0.164037	0.162758	0.161477	0.160193	0.158908	0.157621	0.156334	0.155045	0.153756	0.152466	0.151176	0.149887	0.148598	0.14731	0.146023	0.144737	0.143453	0.142171	0.140892	0.139615	0.138341	0.13707	0.135803	0.134539	0.13328	0.132024	0.130774	0.129529
0	122	0.388273	0.386651	0.384899	0.383161	0.381584	0.379949	0.378401	0.376795	0.375277	0.373774	0.372284	0.370809	0.369348	0.367828	0.366395	0.364902	0.363496	0.362103	0.360724	0.359358	0.358005	0.356664	0.355337	0.354021	0.352644	0.351353	0.35	0.348659	0.347402	0.346156	0.344921	0.343696	0.342408	0.34113	0.339935	0.338749	0.337572	0.336404	0.335244	0.334092	0.332874	0.331737	0.330606	0.329482	0.328364	0.327252	0.326144	0.324969
0	123	-0.294941	-0.29426	-0.29293	-0.292283	-0.291641	-0.291027	-0.290428	-0.289846	-0.289278	-0.288726	-0.288188	-0.287665	-0.287144	-0.286637	-0.285489	-0.28501	-0.284554	-0.284099	-0.283668	-0.283238	-0.28283	-0.281749	-0.281363	-0.280988	-0.280612	-0.280246	-0.2799	-0.279563	-0.279224	-0.278894	-0.278582	-0.278279	-0.277983	-0.277693	-0.277411	-0.277135	-0.276854	-0.276589	-0.27633	-0.276076	-0.275827	-0.27557	-0.275318	-0.27508	-0.274835	-0.274593	-0.274364	-0.274138
0	124	-0.0694847	-0.0675964	-0.0657239	-0.0638677	-0.0620281	-0.0602056	-0.0584006	-0.0566133	-0.0548442	-0.0524749	-0.0501301	-0.0484197	-0.046729	-0.0450585	-0.0434086	-0.0411651	-0.0395583	-0.0379732	-0.0364102	-0.0348697	-0.0333521	-0.0318578	-0.0303871	-0.0289405	-0.0275182	-0.0261207	-0.0247483	-0.0234014	-0.0220804	-0.0207855	-0.0195172	-0.0182757	-0.0170614	-0.0158746	-0.0147156	-0.0135848	-0.0124823	-0.0114086	-0.0103639	-0.00934834	-0.00836232	-0.00740605	-0.00647977	-0.0055837	-0.00471806	-0.00326859	-0.00246526	-0.00169296
0	125	-0.0547742	-0.0521292	-0.0495144	-0.0469308	-0.0443791	-0.0418599	-0.0393741	-0.0369223	-0.0345053	-0.0321238	-0.0297785	-0.0234997	-0.01726	-0.0150307	-0.0128402	-0.0106893	-0.00857866	-0.0065088	-0.00448036	-0.00249393	-0.000550069	0.00135067	0.00320775	0.00502066	0.00678891	0.00851204	0.0101896	0.0118211	0.0134063	0.0149446	0.0205411	0.021983	0.0233771	0.0247232	0.0299675	0.0312152	0.0324142	0.0335644	0.0346656	0.0357177	0.0367206	0.0417743	0.0426769	0.0435303	0.0443346	0.0450899	0.0457962	0.0464537
0	126	0.53363	0.530858	0.528084	0.525309	0.522533	0.519756	0.516978	0.514199	0.511418	0.508636	0.505853	0.503069	0.500284	0.497498	0.49471	0.491922	0.489132	0.48634	0.483548	0.480754	0.477958	0.481889	0.479085	0.476279	0.473472	0.470663	0.474607	0.471789	0.468969	0.466147	0.463322	0.460495	0.457666	0.454834	0.451999	0.449161	0.44632	0.443476	0.440629	0.437778	0.434923	0.432065	0.429202	0.426335	0.423464	0.420588	0.417706	0.41482
0	127	0.363142	0.363159	0.363162	0.363152	0.363129	0.363091	0.363041	0.362977	0.362899	0.362808	0.362753	0.362633	0.362499	0.362351	0.362189	0.362013	0.361822	0.361616	0.361396	0.361213	0.360963	0.360699	0.360421	0.360127	0.359819	0.359496	0.359157	0.358804	0.358436	0.358053	0.357654	0.35724	0.356812	0.356367	0.355908	0.355433	0.354942	0.354436	0.353915	0.353377	0.352824	0.352255	0.351671	0.351071	0.350454	0.349822	0.349174	0.348509
0	128	0.288191	0.286081	0.289778	0.287608	0.28541	0.283186	0.283834	0.284485	0.282178	0.279846	0.27749	0.275107	0.272698	0.270265	0.267806	0.265323	0.262818	0.260287	0.257731	0.255156	0.261313	0.261581	0.258927	0.259179	0.256477	0.253753	0.251007	0.24824	0.251274	0.254298	0.251461	0.251528	0.24865	0.245754	0.245737	0.24573	0.242773	0.239799	0.236806	0.233799	0.230773	0.227732	0.224674	0.2216	0.218511	0.218327	0.215208	0.217891
0	129	0.0556712	0.0556245	0.0555672	0.055499	0.0554199	0.0553299	0.0552289	0.0551167	0.0549935	0.054859	0.0547133	0.0545563	0.0543879	0.0542082	0.0540172	0.0538147	0.0536007	0.0533754	0.0531387	0.0528904	0.0526308	0.0523597	0.0520773	0.0517836	0.0514785	0.0511622	0.0508347	0.050496	0.0501464	0.0497857	0.0494142	0.0490319	0.0486389	0.0482354	0.0478215	0.0473973	0.0469631	0.0465189	0.0460649	0.0456013	0.0451283	0.0446462	0.044155	0.0436551	0.0431466	0.0426297	0.0421048	0.0415721
0	130	-0.119859	-0.119016	-0.118182	-0.117357	-0.116542	-0.115737	-0.114941	-0.114154	-0.113376	-0.112607	-0.111846	-0.111094	-0.11035	-0.109615	-0.108888	-0.108169	-0.107458	-0.0998704	-0.0991821	-0.0985014	-0.0978282	-0.0971622	-0.0965035	-0.0958519	-0.0952074	-0.0945698	-0.093939	-0.0933149	-0.0926976	-0.0920868	-0.0914826	-0.0908847	-0.0902933	-0.0897082	-0.0891293	-0.0885566	-0.08799	-0.0874296	-0.0868752	-0.0863268	-0.0857844	-0.0852479	-0.0847173	-0.0841926	-0.0836738	-0.0831609	-0.0826538	-0.0821526
0	131	0.119493	0.118506	0.117519	0.116529	0.115539	0.114547	0.113554	0.11256	0.111798	0.110804	0.11004	0.109045	0.108281	0.107285	0.106756	0.105761	0.104766	0.103773	0.10278	0.101788	0.100798	0.0998085	0.0988207	0.101213	0.100225	0.0994726	0.0984882	0.101119	0.100135	0.0993868	0.0984076	0.0974307	0.0964564	0.0957179	0.0947488	0.0940145	0.0930509	0.0920902	0.0911326	0.090178	0.0894599	0.0887448	0.088265	0.0875561	0.0866173	0.085682	0.0847501	0.0840539
0	132	0.0396328	0.039809	0.0399761	0.0455054	0.0456505	0.0457859	0.0513128	0.0514266	0.0515311	0.0570117	0.062471	0.0625409	0.0626015	0.0626529	0.0680796	0.0681086	0.0681286	0.068139	0.06814	0.0681321	0.0681148	0.0680881	0.0680521	0.0733834	0.0733252	0.0732576	0.0731805	0.0784655	0.0783661	0.0782573	0.0781385	0.0780105	0.0778729	0.0777258	0.0775689	0.0774025	0.0772263	0.0770404	0.0822302	0.0820215	0.0818026	0.0815739	0.0813357	0.0810876	0.0808296	0.0859622	0.0856806	0.0853894
0	133	-0.26417	-0.264595	-0.265	-0.265383	-0.265743	-0.266083	-0.2664	-0.266695	-0.266965	-0.267212	-0.267437	-0.267638	-0.267815	-0.267968	-0.268094	-0.268196	-0.268273	-0.268325	-0.268351	-0.26835	-0.268322	-0.268268	-0.268188	-0.26808	-0.267944	-0.267782	-0.267592	-0.267374	-0.267128	-0.266853	-0.266551	-0.266219	-0.265859	-0.26547	-0.26505	-0.264602	-0.264125	-0.263619	-0.263081	-0.262515	-0.26192	-0.261292	-0.260637	-0.259951	-0.259233	-0.258487	-0.257711	-0.256904
0	134	-0.772545	-0.769854	-0.767156	-0.764451	-0.761739	-0.75902	-0.756293	-0.753558	-0.750816	-0.748067	-0.745309	-0.742544	-0.73977	-0.736335	-0.733546	-0.730749	-0.727944	-0.725131	-0.722309	-0.71948	-0.715988	-0.713143	-0.710289	-0.707427	-0.704557	-0.70168	-0.698794	-0.694593	-0.691692	-0.688784	-0.685213	-0.68229	-0.679359	-0.67642	-0.673474	-0.669867	-0.666907	-0.663939	-0.660965	-0.657984	-0.654996	-0.652001	-0.649	-0.645992	-0.642977	-0.639303	-0.636277	-0.633244
0	135	0.100374	0.0992412	0.0980984	0.0969455	0.0957825	0.0946094	0.0934261	0.0922327	0.0910292	0.0898155	0.0885918	0.0873579	0.086114	0.0848601	0.0835962	0.0823223	0.0827064	0.0814112	0.0801062	0.0787915	0.0774672	0.0761337	0.0747906	0.0734381	0.0720765	0.0707057	0.0693261	0.0679375	0.0665403	0.0651345	0.0637203	0.0622978	0.0608672	0.0594286	0.0579822	0.0565282	0.0550666	0.0535978	0.0521219	0.050639	0.0491494	0.0476532	0.0461507	0.0446421	0.0431276	0.0416073	0.0400816	0.0385507
0	136	-0.0564047	-0.0575993	-0.0587841	-0.0599593	-0.0611249	-0.0622812	-0.0634281	-0.0645658	-0.0656942	-0.0668137	-0.0679241	-0.0690256	-0.0701182	-0.071202	-0.072277	-0.0733433	-0.0740436	-0.0750926	-0.0761329	-0.0768043	-0.0778275	-0.078842	-0.0798476	-0.0808444	-0.0818324	-0.0828115	-0.0837817	-0.0847429	-0.0856952	-0.0866384	-0.0875724	-0.0884972	-0.0894127	-0.0903188	-0.0912156	-0.0921028	-0.0929804	-0.0938483	-0.0947064	-0.0955547	-0.096393	-0.0972213	-0.0980396	-0.0984904	-0.0989273	-0.0997151	-0.100493	-0.101259
0	137	-0.428988	-0.429466	-0.429903	-0.430298	-0.430653	-0.430957	-0.431228	-0.431457	-0.43164	-0.431782	-0.431885	-0.431946	-0.431961	-0.431934	-0.431869	-0.431762	-0.431614	-0.431422	-0.43119	-0.430915	-0.430589	-0.43023	-0.42983	-0.429385	-0.428902	-0.428378	-0.427813	-0.427208	-0.426557	-0.425871	-0.425145	-0.424379	-0.423564	-0.42272	-0.421836	-0.420913	-0.419944	-0.418932	-0.417896	-0.416822	-0.415702	-0.414555	-0.413371	-0.412151	-0.410892	-0.409597	-0.408268	-0.406908
0	138	-0.5001	-0.497611	-0.495124	-0.492639	-0.490156	-0.487675	-0.485195	-0.482718	-0.480241	-0.477766	-0.47486	-0.471956	-0.469486	-0.466585	-0.464117	-0.46165	-0.458319	-0.455855	-0.453392	-0.450929	-0.448468	-0.446007	-0.443547	-0.440219	-0.437329	-0.434872	-0.432416	-0.429961	-0.427074	-0.424186	-0.421734	-0.419283	-0.416399	-0.41395	-0.411502	-0.409055	-0.406609	-0.404164	-0.401721	-0.399279	-0.396404	-0.386909	-0.384478	-0.374966	-0.372544	-0.370125	-0.367707	-0.365291
0	139	-0.0610067	-0.0602705	-0.0595413	-0.058819	-0.0581034	-0.0573946	-0.0566923	-0.0559964	-0.0549211	-0.0542386	-0.0535623	-0.052656	-0.0519916	-0.051333	-0.0506799	-0.0500323	-0.04939	-0.0487529	-0.0481207	-0.0474934	-0.0468709	-0.0456308	-0.0450181	-0.0444097	-0.0438054	-0.043205	-0.0426084	-0.0420155	-0.0414262	-0.0408402	-0.0402574	-0.0396778	-0.0388656	-0.038292	-0.037721	-0.0371527	-0.0365869	-0.0360235	-0.0354623	-0.0346677	-0.0338749	-0.0333201	-0.0327671	-0.0322159	-0.0316663	-0.0311182	-0.0305715	-0.0297901
0	140	-0.235819	-0.234537	-0.233254	-0.231968	-0.230681	-0.229391	-0.228099	-0.226805	-0.225507	-0.224208	-0.222905	-0.221599	-0.22029	-0.218978	-0.217662	-0.216343	-0.21502	-0.213693	-0.212363	-0.211028	-0.209689	-0.208345	-0.206997	-0.205644	-0.204287	-0.202924	-0.201557	-0.200184	-0.198807	-0.197423	-0.196035	-0.194641	-0.193241	-0.191836	-0.190424	-0.189007	-0.187584	-0.186154	-0.184719	-0.183277	-0.181829	-0.180375	-0.178914	-0.177447	-0.175974	-0.174494	-0.173007	-0.171514
0	142	0.59738	0.594459	0.591547	0.588644	0.585752	0.582869	0.579996	0.577132	0.574277	0.571432	0.568595	0.565767	0.562947	0.560135	0.557332	0.554536	0.551747	0.548965	0.54619	0.543422	0.540659	0.537903	0.535152	0.532405	0.529664	0.526927	0.524194	0.521464	0.518738	0.516015	0.513294	0.510575	0.507858	0.505142	0.502428	0.499714	0.497	0.494287	0.491573	0.488858	0.486142	0.48344	0.480721	0.478	0.475277	0.472551	0.469838	0.467105
0	143	-0.00921568	-0.0093117	-0.00941544	-0.00952681	-0.00964576	-0.00977219	-0.00990603	-0.00941327	-0.00956197	-0.00971782	-0.00988073	-0.0100506	-0.0102273	-0.00977863	-0.00996905	-0.010166	-0.0103694	-0.00994681	-0.0101629	-0.010385	-0.0106129	-0.0108466	-0.0104512	-0.0106961	-0.0109463	-0.0112015	-0.0114617	-0.0117265	-0.0119959	-0.0122696	-0.0125475	-0.0128294	-0.0131151	-0.0134044	-0.0136971	-0.013993	-0.0142919	-0.0145936	-0.0148979	-0.0152047	-0.0155137	-0.0158246	-0.0161374	-0.0158174	-0.0155013	-0.0158189	-0.0161374	-0.0164566
0	144	-0.120413	-0.121893	-0.123381	-0.124877	-0.12638	-0.127889	-0.129403	-0.130921	-0.132442	-0.133967	-0.135493	-0.137021	-0.134743	-0.136272	-0.1378	-0.139326	-0.140849	-0.142367	-0.143882	-0.14539	-0.146892	-0.148387	-0.149874	-0.151353	-0.152821	-0.154279	-0.151919	-0.153356	-0.154781	-0.156192	-0.157588	-0.158969	-0.156514	-0.157865	-0.159199	-0.160514	-0.161811	-0.163088	-0.164345	-0.165582	-0.166797	-0.167989	-0.169159	-0.170305	-0.171428	-0.172526	-0.173599	-0.174646
0	146	0.399298	0.397653	0.402284	0.400602	0.399003	0.39729	0.395561	0.393817	0.392057	0.390281	0.388489	0.386681	0.384858	0.383018	0.381163	0.379292	0.377406	0.375503	0.373584	0.37165	0.3697	0.373952	0.378241	0.376231	0.374206	0.372166	0.37011	0.368038	0.365951	0.363848	0.36173	0.359646	0.357546	0.355382	0.353202	0.351008	0.348847	0.346623	0.344433	0.342179	0.33991	0.337626	0.335378	0.333065	0.330788	0.328447	0.326091	0.323722
0	147	0.265882	0.264003	0.262139	0.260289	0.258454	0.256634	0.254827	0.253035	0.251257	0.249493	0.247743	0.246007	0.244285	0.242576	0.24088	0.239198	0.237529	0.235872	0.234228	0.232597	0.230978	0.229371	0.227776	0.226192	0.22462	0.223059	0.221509	0.219969	0.21844	0.216921	0.215412	0.213913	0.212424	0.210943	0.209472	0.20801	0.206556	0.205111	0.203674	0.202245	0.200824	0.19941	0.198004	0.196605	0.195213	0.193828	0.19245	0.191079
0	148	0.108966	0.107608	0.106255	0.104906	0.103563	0.102225	0.100892	0.0995638	0.0982408	0.0969228	0.0956099	0.0943021	0.0929994	0.0917018	0.0904093	0.089122	0.0878397	0.0865626	0.0852906	0.0919229	0.0906559	0.089394	0.0881371	0.0868854	0.0856387	0.0843971	0.0831605	0.0819288	0.0807022	0.0794805	0.0782638	0.0770519	0.0758448	0.0746425	0.0813317	0.0801335	0.0789399	0.077751	0.0765665	0.0753866	0.074211	0.0730398	0.0718728	0.0707099	0.0695512	0.0683965	0.0672456	0.0660987
0	149	0.11245	0.111282	0.11012	0.108964	0.107813	0.106666	0.105524	0.104385	0.10325	0.102119	0.10099	0.0998645	0.11104	0.109905	0.108772	0.107641	0.10651	0.105381	0.104252	0.103123	0.114293	0.113151	0.112009	0.110865	0.109721	0.108576	0.107429	0.106281	0.105132	0.103981	0.102827	0.101672	0.100515	0.0993558	0.0981943	0.0970305	0.0958645	0.0946962	0.0935256	0.0923528	0.0911778	0.0900005	0.0888212	0.0876399	0.0864566	0.0852716	0.0840848	0.0828965
0	150	0.15231	0.151848	0.151385	0.150923	0.15046	0.149998	0.149615	0.149152	0.148688	0.148225	0.147761	0.147297	0.146832	0.146368	0.145903	0.145437	0.145051	0.144585	0.144119	0.143901	0.143434	0.143215	0.142747	0.142278	0.14181	0.141421	0.140952	0.140483	0.140014	0.139545	0.139077	0.138608	0.138139	0.137829	0.137361	0.136892	0.136424	0.135956	0.135488	0.135021	0.134634	0.134168	0.133702	0.133237	0.132772	0.132387	0.132004	0.131541
0	151	-0.326652	-0.326473	-0.326278	-0.326066	-0.325838	-0.325593	-0.325331	-0.325052	-0.324756	-0.324444	-0.323236	-0.322892	-0.320779	-0.320405	-0.320014	-0.319608	-0.31831	-0.317872	-0.317417	-0.316945	-0.316458	-0.315954	-0.315434	-0.314898	-0.314347	-0.313779	-0.313195	-0.312596	-0.311982	-0.311352	-0.310707	-0.309167	-0.308493	-0.307803	-0.3071	-0.306381	-0.305647	-0.3049	-0.304137	-0.303361	-0.30257	-0.301766	-0.300947	-0.300115	-0.29927	-0.298411	-0.297538	-0.296653
[truncated: 3,452 more columns]
