# Supplementary material for: Pupil dilation offers a time-window on prediction error
Source: eLife. 2026 Jan 8;14:RP105287. doi: 10.7554/eLife.105287 (PMC12782557; doi:10.7554/eLife.105287)
Supplement: Figure 3—figure supplement 1—source data 1. [file elife-105287-fig3-figsupp1-data1.xlsx]

## Sheet: panels A & B
	subject	trial_num	letter	frequency	r	g	b	PBASE	ITI	match	button	correct	RT	block	blinks_ratio	blinks_exclude	pupil_feed_locked_t1	pupil_feed_locked_t2	pupil_baseline_feed_locked	missing	drop_trial	letter_color_pair	model_p	model_i	model_H	model_D
0	102	0	D	80	76	154	68	3.77	5.5	0	ralt	FALSE	0.916456	1	0.272	FALSE	18.1153	-2.66032	16.759	FALSE	FALSE	6	0.0277778	5.16993	5.1554	0.0145257
1	102	1	I	80	138	154	91	5.34	4.9	0	ralt	FALSE	1.47125	1	0	FALSE	23.4132	3.82218	-10.9379	FALSE	FALSE	16	0.027027	5.20945	5.14266	0.0272606
2	102	2	T	40	157	193	131	4.07	5.23	1	lalt	FALSE	1.02513	1	0	FALSE	9.87331	-2.75204	-6.3449	FALSE	FALSE	31	0.0263158	5.24793	5.13156	0.0266152
3	102	3	R	20	138	154	91	4.71	4.43	0	ralt	FALSE	0.895033	1	0	FALSE	17.6613	2.6224	-3.80468	FALSE	FALSE	28	0.025641	5.2854	5.12193	0.0259994
4	102	4	A	20	157	193	131	3.56	3.63	0	lalt	TRUE	1.31593	1	0	FALSE	14.9466	19.933	-11.5529	FALSE	FALSE	1	0.025	5.32193	5.11365	0.0254112
5	102	5	A	20	75	124	89	5.3	4.76	1	ralt	TRUE	1.43497	1	0	FALSE	5.19948	-9.57956	7.62582	FALSE	FALSE	5	0.0243902	5.35755	5.1066	0.0248488
6	102	6	R	20	76	154	68	4.34	4.98	1	lalt	FALSE	1.4138	1	0	FALSE	13.2904	-11.386	10.9366	FALSE	FALSE	24	0.0238095	5.39232	5.10068	0.0243105
7	102	7	T	40	157	193	131	5.22	5.22	1	lalt	FALSE	1.33471	1	0	FALSE	11.9456	3.48619	-7.69498	FALSE	FALSE	31	0.0465116	4.42626	5.07864	0.0182242
8	102	8	D	80	0	168	107	5.31	4.28	1	lalt	FALSE	1.47234	1	0.114	FALSE	1.05073	3.61785	-4.24899	FALSE	FALSE	8	0.0227273	5.45943	5.07508	0.0178536
9	102	9	I	80	3	121	112	4.17	5.06	1	ralt	TRUE	1.30517	1	0	FALSE	16.5637	5.74875	-2.97653	FALSE	FALSE	15	0.0222222	5.49185	5.07237	0.0228262
10	102	10	T	40	76	154	68	5	4.49	0	lalt	TRUE	1.03016	1	0	FALSE	9.48248	25.0307	-13.4169	FALSE	FALSE	30	0.0217391	5.52356	5.07044	0.0223706
11	102	11	I	80	3	121	112	4.56	4.85	1	ralt	TRUE	1.18509	1	0	FALSE	5.54069	-1.39455	-9.93307	FALSE	FALSE	15	0.0425532	4.55459	5.05351	0.0168263
12	102	12	I	80	3	121	112	4.76	3.79	1	lalt	FALSE	1.83489	1	0	FALSE	16.1228	-16.6448	5.62038	FALSE	FALSE	15	0.0625	4	5.02788	0.0215117
13	102	13	I	80	75	124	89	4.57	5.4	0	lalt	TRUE	0.824863	1	0	FALSE	-3.74482	-1.37636	2.46103	FALSE	FALSE	17	0.0204082	5.61471	5.02876	0.0143093
14	102	14	D	80	138	154	91	4.89	5.09	0	lalt	TRUE	0.732748	1	0	FALSE	10.5067	-6.09257	5.50517	FALSE	FALSE	10	0.02	5.64386	5.03017	0.0207159
15	102	15	A	20	76	154	68	5.39	4.73	0	ralt	FALSE	1.0346	1	0	FALSE	9.80587	8.77317	-2.72018	FALSE	FALSE	0	0.0196078	5.67243	5.03208	0.0203395
16	102	16	A	20	0	168	107	5.26	4.69	0	lalt	TRUE	1.13142	1	0	FALSE	2.9219	0.764043	-5.94754	FALSE	FALSE	2	0.0192308	5.70044	5.03443	0.0199766
17	102	17	A	20	138	154	91	3.64	3.67	0	lalt	TRUE	1.79815	1	0	FALSE	-2.0739	6.31425	2.18418	FALSE	FALSE	4	0.0188679	5.72792	5.0372	0.0196263
18	102	18	A	20	75	124	89	4.56	5.05	1	ralt	TRUE	1.31623	1	0	FALSE	-6.49788	-6.82673	-2.96186	FALSE	FALSE	5	0.037037	4.75489	5.02664	0.0148314
19	102	19	D	80	0	168	107	3.6	5.07	1	lalt	FALSE	1.09304	1	0.0488571	FALSE	6.84263	-9.36133	8.61456	FALSE	FALSE	8	0.0363636	4.78136	5.01691	0.0102071
20	102	20	I	80	3	121	112	5.36	4.82	1	ralt	TRUE	0.99707	1	0	FALSE	6.92042	5.05925	-6.66128	FALSE	FALSE	15	0.0714286	3.80735	4.99299	0.00749651
21	102	21	R	20	157	193	131	3.59	5.04	0	ralt	FALSE	1.0439	1	0	FALSE	3.39156	4.77116	5.13001	FALSE	FALSE	25	0.0175439	5.83289	4.99808	0.0116091
22	102	22	D	80	75	124	89	4.43	4.06	0	ralt	FALSE	1.04686	1	0.143429	FALSE	0.00922266	-5.28932	-13.3708	FALSE	FALSE	11	0.0172414	5.85798	5.00342	0.0180436
23	102	23	O	40	76	154	68	4.92	4.57	0	ralt	FALSE	1.07683	1	0	FALSE	21.7862	11.4896	-14.4409	FALSE	FALSE	18	0.0169492	5.88264	5.00899	0.0177571
24	102	24	O	40	76	154	68	5.19	3.61	0	lalt	TRUE	1.29268	1	0	FALSE	15.2546	1.3749	-12.8588	FALSE	FALSE	18	0.0333333	4.90689	5.00239	0.0298547
25	102	25	O	40	0	168	107	4.72	4.91	0	lalt	TRUE	2.15247	1	0.0437143	FALSE	2.35447	-21.2449	12.0024	FALSE	FALSE	20	0.0163934	5.93074	5.00856	0.013257
26	102	26	T	40	3	121	112	5.22	5.24	0	lalt	TRUE	1.08741	1	0	FALSE	6.54435	4.7435	-5.66671	FALSE	FALSE	33	0.016129	5.9542	5.01491	0.0169495
27	102	27	O	40	138	154	91	5.35	5	1	lalt	FALSE	0.779223	1	0	FALSE	24.76	-15.9746	44.1875	FALSE	FALSE	22	0.015873	5.97728	5.02142	0.0166963
28	102	28	O	40	76	154	68	3.73	4.37	0	lalt	TRUE	0.92403	1	0	FALSE	0.594265	3.73635	-3.10488	FALSE	FALSE	18	0.046875	4.41504	5.00892	0.0112221
29	102	29	I	80	3	121	112	4.78	4.76	1	ralt	TRUE	1.90598	1	0.337429	FALSE	14.8885	-0.226923	-25.0278	FALSE	FALSE	15	0.0769231	3.70044	4.98721	0.00467189
30	102	30	D	80	3	121	112	5.41	4.11	0	ralt	FALSE	0.858847	1	0.249429	FALSE	7.30779	0.0351173	-16.2191	FALSE	FALSE	9	0.0151515	6.04439	4.99483	0.00968469
31	102	31	A	20	75	124	89	3.75	5.35	1	lalt	FALSE	0.766782	1	0	FALSE	-10.0001	-24.0653	29.3482	FALSE	FALSE	5	0.0447761	4.48113	4.98423	0.010757
32	102	32	D	80	75	124	89	4.87	4.78	0	ralt	FALSE	1.45365	1	0.123143	FALSE	-3.94687	2.98698	-3.72289	FALSE	FALSE	11	0.0294118	5.08746	4.98136	0.00705803
33	102	33	T	40	157	193	131	4.22	5.13	1	ralt	TRUE	0.885553	1	0	FALSE	9.05292	14.296	-8.59951	FALSE	FALSE	31	0.0434783	4.52356	4.97186	0.00696607
34	102	34	T	40	157	193	131	5.36	5.13	1	ralt	TRUE	1.10145	1	0	FALSE	4.64156	-7.65002	21.3896	FALSE	FALSE	31	0.0571429	4.12928	4.95779	0.0106763
35	102	35	I	80	76	154	68	3.74	3.52	0	ralt	FALSE	1.49519	1	0.329143	FALSE	8.11323	3.54322	-21.738	FALSE	FALSE	12	0.0140845	6.14975	4.96674	0.00949191
36	102	36	O	40	3	121	112	4.57	5.11	0	ralt	FALSE	1.3852	1	0.384571	FALSE	-9.42829	-12.7278	-4.79736	FALSE	FALSE	21	0.0138889	6.16993	4.97573	0.0147171
37	102	37	I	80	76	154	68	4.07	3.56	0	lalt	TRUE	1.02411	1	0	FALSE	2.0768	12.7679	13.9593	FALSE	FALSE	12	0.0273973	5.18982	4.97453	0.0112134
38	102	38	T	40	76	154	68	4.59	3.77	0	missing	FALSE		1	0	FALSE	-7.25812	-32.3554	31.2314	TRUE	TRUE	30	0.027027	5.20945	4.97363	0.00780287
39	102	39	O	40	138	154	91	4.47	3.55	1	ralt	TRUE	1.55299	1	0	FALSE	-4.99175	-3.92653	2.12702	FALSE	FALSE	22	0.0266667	5.22882	4.97301	0.0077071
40	102	40	D	80	0	168	107	5.22	4.25	1	ralt	TRUE	1.9409	1	0	FALSE	0.260911	-16.2419	-4.10242	FALSE	FALSE	8	0.0394737	4.66297	4.96628	0.00638329
41	102	41	A	20	0	168	107	3.76	4.28	0	lalt	TRUE	0.885779	1	0	FALSE	2.28918	5.41904	-4.01926	FALSE	FALSE	2	0.025974	5.26679	4.96625	0.00630783
42	102	42	T	40	157	193	131	5.5	4.41	1	ralt	TRUE	0.540868	1	0	FALSE	3.78557	-14.5219	2.87216	FALSE	FALSE	31	0.0641026	3.96347	4.95196	0.00519686
43	102	43	R	20	76	154	68	5.28	3.91	1	ralt	TRUE	1.31269	1	0.482	TRUE	13.9217	16.239	-22.7152	FALSE	FALSE	24	0.0253165	5.30378	4.95257	0.0051378
44	102	44	I	80	138	154	91	4.92	5.49	0	lalt	TRUE	1.11058	1	0	FALSE	-9.40487	-13.8426	9.4776	FALSE	FALSE	16	0.025	5.32193	4.95338	0.0072613
45	102	45	O	40	138	154	91	5.41	5.03	1	lalt	FALSE	1.5482	1	0.126286	FALSE	-4.52088	-26.6119	11.2755	FALSE	FALSE	22	0.037037	4.75489	4.94842	0.00602289
46	102	46	D	80	76	154	68	3.74	3.86	0	ralt	FALSE	1.11115	1	0	FALSE	9.75529	-1.75474	-12.9522	FALSE	FALSE	6	0.0243902	5.35755	4.94969	0.0059556
47	102	47	R	20	76	154	68	5.34	4.11	1	ralt	TRUE	1.35315	1	0.135143	FALSE	-8.05204	2.41781	-13.1166	FALSE	FALSE	24	0.0361446	4.79008	4.94531	0.00588979
48	102	48	D	80	0	168	107	4.47	4.85	1	ralt	TRUE	1.45898	1	0	FALSE	14.9557	22.3506	-8.60543	FALSE	FALSE	8	0.047619	4.39232	4.93694	0.00411662
49	102	49	D	80	3	121	112	4.22	3.96	0	lalt	TRUE	1.20189	1	0.228571	FALSE	6.00348	-7.62157	-14.6749	FALSE	FALSE	9	0.0235294	5.40939	4.9389	0.00517509
50	102	50	T	40	75	124	89	5.4	4.64	0	lalt	TRUE	1.55386	1	0	FALSE	-7.53263	-3.22709	9.00957	FALSE	FALSE	35	0.0116279	6.42626	4.94969	0.00960707
51	102	51	A	20	157	193	131	5.04	5.37	0	lalt	TRUE	1.24769	1	0.266	FALSE	-9.20324	-18.5198	-1.07832	FALSE	FALSE	1	0.0229885	5.44294	4.95184	0.00950231
52	102	52	A	20	3	121	112	4.66	4.44	0	lalt	TRUE	1.89551	1	0.292857	FALSE	-2.58287	0.256933	-15.444	FALSE	FALSE	3	0.0113636	6.45943	4.96261	0.00939981
53	102	53	O	40	138	154	91	5.48	3.85	1	ralt	TRUE	2.34522	1	0.281714	FALSE	-5.30803	-4.36653	4.74827	FALSE	FALSE	22	0.0449438	4.47573	4.95543	0.00768564
54	102	54	O	40	138	154	91	4	4.6	1	ralt	TRUE	0.65613	1	0	FALSE	2.92856	1.26258	-6.20548	FALSE	FALSE	22	0.0555556	4.16993	4.9454	0.00650775
55	102	55	T	40	0	168	107	4.36	5.14	0	ralt	FALSE	0.836079	1	0.105429	FALSE	5.50281	16.5094	-5.90724	FALSE	FALSE	32	0.010989	6.50779	4.95641	0.00718469
56	102	56	T	40	76	154	68	4.59	4.94	0	ralt	FALSE	0.813986	1	0.304857	FALSE	5.79211	-5.18467	-14.4808	FALSE	FALSE	30	0.0326087	4.9386	4.95396	0.00799228
57	102	57	R	20	76	154	68	4.65	5.47	1	ralt	TRUE	1.9828	1	0	FALSE	7.49233	-0.609147	26.9756	FALSE	FALSE	24	0.0430108	4.53916	4.94786	0.00375811
58	102	58	A	20	75	124	89	4.8	3.54	1	ralt	TRUE	1.51361	1	0	FALSE	-11.4822	-11.991	-27.1834	FALSE	FALSE	5	0.0425532	4.55459	4.94204	0.00319037
59	102	59	D	80	0	168	107	3.65	4.39	1	ralt	TRUE	1.31358	1	0.114	FALSE	0.56481	11.8579	-20.4392	FALSE	FALSE	8	0.0526316	4.24793	4.93348	0.00283309
60	102	60	O	40	138	154	91	3.63	5.43	1	lalt	FALSE	1.77773	2	0	FALSE	-3.89081	-18.0721	34.6219	FALSE	FALSE	22	0.0625	4	4.92276	0.00226187
61	102	61	D	80	0	168	107	4.32	3.66	1	ralt	TRUE	0.622706	2	0	FALSE	0.486995	-3.66494	6.70906	FALSE	FALSE	8	0.0618557	4.01495	4.9124	0.002023
62	102	62	T	40	138	154	91	4.15	3.56	0	lalt	TRUE	1.30171	2	0	FALSE	18.7112	-1.85471	-16.3488	FALSE	FALSE	34	0.0102041	6.61471	4.92404	0.00648296
63	102	63	I	80	3	121	112	3.67	4.22	1	ralt	TRUE	1.71864	2	0	FALSE	-3.20547	-9.1628	-8.56853	FALSE	FALSE	15	0.0606061	4.04439	4.91418	0.00642112
64	102	64	O	40	3	121	112	4.08	4.56	0	lalt	TRUE	0.745742	2	0	FALSE	0.928639	-8.31662	-2.28852	FALSE	FALSE	21	0.02	5.64386	4.91838	0.0039336
65	102	65	R	20	76	154	68	3.52	3.82	1	ralt	TRUE	0.965718	2	0	FALSE	-2.61265	4.90384	6.32002	FALSE	FALSE	24	0.049505	4.33628	4.91142	0.00410824
66	102	66	D	80	138	154	91	4.25	5.03	0	ralt	FALSE	0.763813	2	0	FALSE	7.01452	1.98515	1.09572	FALSE	FALSE	10	0.0196078	5.67243	4.91584	0.00407109
67	102	67	O	40	0	168	107	4.52	4.92	0	lalt	TRUE	0.629758	2	0.112	FALSE	9.84311	13.4545	-10.8794	FALSE	FALSE	20	0.0194175	5.6865	4.92032	0.00573346
68	102	68	A	20	75	124	89	3.94	4.02	1	ralt	TRUE	1.47655	2	0	FALSE	5.59426	-8.66741	8.68021	FALSE	FALSE	5	0.0480769	4.37851	4.91393	0.00399876
69	102	69	D	80	75	124	89	5.39	4.45	0	lalt	TRUE	1.56959	2	0	FALSE	10.104	4.09103	-10.4389	FALSE	FALSE	11	0.0285714	5.12928	4.91398	0.0030698
70	102	70	I	80	3	121	112	5.34	4.42	1	ralt	TRUE	1.4434	2	0	FALSE	7.93373	-2.95102	5.34774	FALSE	FALSE	15	0.0660377	3.92057	4.90384	0.00269732
71	102	71	D	80	0	168	107	3.56	4.27	1	ralt	TRUE	1.4532	2	0	FALSE	4.4337	14.5206	-3.2696	FALSE	FALSE	8	0.0654206	3.93411	4.89401	0.00157296
72	102	72	I	80	75	124	89	3.9	4.31	0	lalt	TRUE	1.06427	2	0	FALSE	-9.55138	-10.9049	-1.49125	FALSE	FALSE	17	0.0185185	5.75489	4.8991	0.00352164
73	102	73	A	20	0	168	107	5.12	3.93	0	lalt	TRUE	0.692255	2	0	FALSE	5.0963	-5.52219	-10.3877	FALSE	FALSE	2	0.0275229	5.18322	4.89977	0.00457358
74	102	74	I	80	3	121	112	4.22	4.42	1	ralt	TRUE	0.401236	2	0.240286	FALSE	18.1586	11.4373	-8.46952	FALSE	FALSE	15	0.0727273	3.78136	4.88897	0.00250247
75	102	75	D	80	75	124	89	4.76	4.67	0	lalt	TRUE	0.477238	2	0	FALSE	13.965	17.0222	-12.0761	FALSE	FALSE	11	0.036036	4.79442	4.8867	0.00203127
76	102	76	A	20	157	193	131	4.68	3.99	0	ralt	FALSE	0.740194	2	0	FALSE	2.24107	12.2316	9.4646	FALSE	FALSE	1	0.0267857	5.22239	4.8878	0.0031731
77	102	77	T	40	138	154	91	3.92	5.17	0	ralt	FALSE	1.23413	2	0	FALSE	4.37201	-16.839	-2.68309	FALSE	FALSE	34	0.0176991	5.82018	4.8933	0.00442138
78	102	78	I	80	3	121	112	5.09	3.84	1	ralt	TRUE	0.3111	2	0	FALSE	9.24934	12.9155	-13.7814	FALSE	FALSE	15	0.0789474	3.66297	4.88198	0.00316646
79	102	79	A	20	138	154	91	5.03	4.31	0	lalt	TRUE	1.11996	2	0	FALSE	4.29413	-3.64296	-4.95242	FALSE	FALSE	4	0.0173913	5.84549	4.88765	0.00314107
80	102	80	R	20	0	168	107	5.2	4.7	0	ralt	FALSE	2.25584	2	0.136286	FALSE	-8.4465	-8.19486	-6.28647	FALSE	FALSE	26	0.00862069	6.85798	4.89978	0.00721839
81	102	81	I	80	3	121	112	4.03	4.57	1	ralt	TRUE	0.456738	2	0	FALSE	0.288136	13.2168	16.75	FALSE	FALSE	15	0.0854701	3.54844	4.88779	0.00510522
82	102	82	A	20	75	124	89	5.13	4.66	1	lalt	FALSE	1.58855	2	0	FALSE	12.0599	14.804	-9.03482	FALSE	FALSE	5	0.0508475	4.29768	4.88192	0.00133927
83	102	83	A	20	75	124	89	3.64	3.59	1	ralt	TRUE	0.93451	2	0.108857	FALSE	-7.88563	-6.41573	-14.649	FALSE	FALSE	5	0.0588235	4.08746	4.87453	0.00342162
84	102	84	O	40	3	121	112	3.94	4.54	0	lalt	TRUE	0.631631	2	0.114857	FALSE	5.43726	31.2907	-22.1965	FALSE	FALSE	21	0.025	5.32193	4.87648	0.00241164
85	102	85	I	80	157	193	131	3.93	3.71	0	lalt	TRUE	0.333685	2	0	FALSE	7.98085	3.09688	10.6345	FALSE	FALSE	13	0.00826446	6.91886	4.8887	0.00615449
86	102	86	R	20	76	154	68	5.28	4.6	1	ralt	TRUE	1.48068	2	0	FALSE	-3.53982	5.66449	-6.47962	FALSE	FALSE	24	0.0491803	4.34577	4.88341	0.00526537
87	102	87	A	20	157	193	131	3.84	4.91	0	lalt	TRUE	0.393574	2	0	FALSE	3.7242	-11.6345	-6.87225	FALSE	FALSE	1	0.0325203	4.94251	4.88259	0.00207641
88	102	88	D	80	0	168	107	3.88	3.54	1	ralt	TRUE	0.617573	2	0	FALSE	-2.7436	13.1808	-23.1784	FALSE	FALSE	8	0.0645161	3.9542	4.87451	0.00184194
89	102	89	I	80	0	168	107	4.35	5.04	0	lalt	TRUE	0.806672	2	0.14	FALSE	-7.56772	-1.48003	16.1859	FALSE	FALSE	14	0.008	6.96578	4.88673	0.0049269
90	102	90	T	40	157	193	131	5.18	4.3	1	lalt	FALSE	2.19748	2	0	FALSE	-0.663749	-1.78003	-3.82866	FALSE	FALSE	31	0.047619	4.39232	4.88199	0.00510548
91	102	91	D	80	0	168	107	4.38	3.69	1	ralt	TRUE	0.543402	2	0	FALSE	-0.564758	-11.0085	9.91624	FALSE	FALSE	8	0.0708661	3.81876	4.87312	0.00131725
92	102	92	I	80	3	121	112	5.34	4.19	1	ralt	TRUE	0.810421	2	0	FALSE	-6.03859	-12.4584	2.55447	FALSE	FALSE	15	0.0859375	3.54057	4.86234	0.000917908
93	102	93	O	40	138	154	91	5.01	3.74	1	lalt	FALSE	0.947263	2	0	FALSE	13.167	-10.7115	-5.2414	FALSE	FALSE	22	0.0542636	4.20387	4.85656	0.00107473
94	102	94	D	80	138	154	91	3.56	3.58	0	lalt	TRUE	0.769288	2	0.225143	FALSE	7.86456	7.58455	-28.7308	FALSE	FALSE	10	0.0230769	5.43741	4.85938	0.00224174
95	102	95	I	80	75	124	89	4.86	4.83	0	lalt	TRUE	0.643417	2	0	FALSE	5.11282	24.1296	-15.1191	FALSE	FALSE	17	0.0229008	5.44846	4.86223	0.00312748
96	102	96	R	20	75	124	89	3.94	4.28	0	ralt	FALSE	1.29218	2	0	FALSE	-4.96295	-31.3377	27.7039	FALSE	FALSE	29	0.00757576	7.04439	4.87449	0.00566049
97	102	97	R	20	138	154	91	5.27	5.09	0	lalt	TRUE	0.56627	2	0.08	FALSE	15.9473	34.3812	-18.5773	FALSE	FALSE	28	0.0150376	6.05528	4.88101	0.00632648
98	102	98	T	40	157	193	131	4.33	4.28	1	ralt	TRUE	2.14299	2	0	FALSE	-9.59635	-28.8001	3.29572	FALSE	FALSE	31	0.0522388	4.25873	4.87571	0.00288201
99	102	99	R	20	76	154	68	4.72	4.17	1	ralt	TRUE	1.02697	2	0	FALSE	-0.00109081	21.0196	-40.063	FALSE	FALSE	24	0.0518519	4.26946	4.87057	0.00129048
100	102	100	A	20	75	124	89	3.74	4.49	1	lalt	FALSE	1.31292	2	0	FALSE	8.78318	0.68215	20.1175	FALSE	FALSE	5	0.0588235	4.08746	4.86426	0.00119582
101	102	101	T	40	3	121	112	3.92	5.49	0	lalt	TRUE	0.740896	2	0	FALSE	-4.09918	-3.15755	11.6519	FALSE	FALSE	33	0.0145985	6.09803	4.87098	0.00273703
102	102	102	A	20	75	124	89	3.61	3.87	1	ralt	TRUE	1.58675	2	0	FALSE	14.979	20.4101	-18.3864	FALSE	FALSE	5	0.0652174	3.9386	4.86375	0.00265157
103	102	103	T	40	76	154	68	4.04	3.73	0	lalt	TRUE	1.69475	2	0.155429	FALSE	-6.27072	-18.272	-8.01772	FALSE	FALSE	30	0.028777	5.11894	4.86442	0.00159624
104	102	104	O	40	0	168	107	5.33	5	0	lalt	TRUE	1.37076	2	0	FALSE	3.07409	10.2107	5.07144	FALSE	FALSE	20	0.0214286	5.54432	4.86773	0.00257972
105	102	105	D	80	0	168	107	4.23	3.97	1	ralt	TRUE	0.760583	2	0	FALSE	3.07924	-7.60895	-5.60975	FALSE	FALSE	8	0.070922	3.81762	4.85988	0.00187878
106	102	106	A	20	75	124	89	3.95	4.06	1	ralt	TRUE	0.673625	2	0	FALSE	1.84153	13.2427	-8.63665	FALSE	FALSE	5	0.0704225	3.82782	4.85221	0.000834404
107	102	107	A	20	75	124	89	5.24	4.68	1	ralt	TRUE	2.12854	2	0.138	FALSE	2.67507	5.54992	-6.06871	FALSE	FALSE	5	0.0769231	3.70044	4.84381	0.00174165
108	102	108	R	20	76	154	68	5.32	4.65	1	ralt	TRUE	1.42934	2	0.244571	FALSE	5.20429	14.3224	-14.649	FALSE	FALSE	24	0.0555556	4.16993	4.8386	0.000898078
109	102	109	I	80	3	121	112	4.63	4.93	1	ralt	TRUE	0.559208	2	0	FALSE	9.02578	-18.8985	13.5555	FALSE	FALSE	15	0.0827586	3.59495	4.82971	0.000857489
110	102	110	T	40	75	124	89	4.88	3.72	0	ralt	FALSE	0.680138	2	0.0208571	FALSE	17.2211	-18.6898	-0.178236	FALSE	FALSE	35	0.0136986	6.18982	4.83687	0.00238703
111	102	111	I	80	138	154	91	5.3	4.57	0	lalt	TRUE	0.589137	2	0	FALSE	-4.96382	-11.2217	3.48679	FALSE	FALSE	16	0.0204082	5.61471	4.84069	0.00344577
112	102	112	A	20	3	121	112	4.78	5.08	0	lalt	TRUE	2.23585	2	0	FALSE	8.36633	16.7072	15.1925	FALSE	FALSE	3	0.0135135	6.20945	4.84782	0.00342354
113	102	113	O	40	138	154	91	4.76	3.91	1	lalt	FALSE	0.503744	2	0	FALSE	7.49939	11.2872	-26.7374	FALSE	FALSE	22	0.0536913	4.21917	4.84308	0.00252943
114	102	114	R	20	0	168	107	5.35	3.83	0	ralt	FALSE	2.23864	2	0.166571	FALSE	-8.8321	-16.8694	3.07767	FALSE	FALSE	26	0.0133333	6.22882	4.85022	0.00251353
115	102	115	O	40	138	154	91	4.01	4.6	1	ralt	TRUE	1.29248	2	0.28	FALSE	15.8145	-3.94583	16.0131	FALSE	FALSE	22	0.0596026	4.06848	4.8446	0.00243669
116	102	116	O	40	75	124	89	4.37	3.68	0	lalt	TRUE	1.36445	2	0	FALSE	-17.247	-30.6412	11.0059	FALSE	FALSE	23	0.00657895	7.24793	4.8567	0.00402363
117	102	117	D	80	138	154	91	5.29	4.31	0	lalt	TRUE	1.48641	2	0	FALSE	-6.5427	-8.88651	5.08168	FALSE	FALSE	10	0.0261438	5.25739	4.85825	0.0045802
118	102	118	R	20	76	154	68	5.38	4.19	1	ralt	TRUE	1.41727	2	0	FALSE	8.61534	-11.6907	7.02771	FALSE	FALSE	24	0.0584416	4.09686	4.85287	0.00145487
119	102	119	R	20	76	154	68	4.97	5.41	1	ralt	TRUE	1.09612	2	0.368857	FALSE	4.44237	13.0166	-47.6897	FALSE	FALSE	24	0.0645161	3.9542	4.84669	0.00179825
120	102	120	R	20	3	121	112	5.01	4.81	0	lalt	TRUE	0.743023	3	0.401429	TRUE	8.34561	31.7123	18.1886	FALSE	FALSE	27	0.00641026	7.2854	4.8587	0.00387651
121	102	121	D	80	0	168	107	4.1	5.45	1	lalt	FALSE	0.453846	3	0	FALSE	3.26795	2.92339	8.35134	FALSE	FALSE	8	0.0700637	3.83519	4.85185	0.00381369
122	102	122	T	40	157	193	131	4.41	4.12	1	lalt	FALSE	1.45176	3	0	FALSE	17.2963	3.6663	-8.16988	FALSE	FALSE	31	0.0506329	4.30378	4.84789	0.000830219
123	102	123	R	20	76	154	68	4.39	4.28	1	ralt	TRUE	0.951749	3	0	FALSE	-6.65854	-3.74088	-1.86538	FALSE	FALSE	24	0.0691824	3.85345	4.8413	0.000825751
124	102	124	D	80	0	168	107	4.2	4.37	1	ralt	TRUE	2.36457	3	0	FALSE	-5.71838	-1.15992	-9.01903	FALSE	FALSE	8	0.075	3.73697	4.83411	0.000646664
125	102	125	D	80	157	193	131	4.4	3.86	0	lalt	TRUE	1.18052	3	0	FALSE	5.03651	4.60431	-16.7949	FALSE	FALSE	7	0.00621118	7.33092	4.84611	0.00369046
126	102	126	O	40	157	193	131	5.32	4.67	0	lalt	TRUE	0.955537	3	0	FALSE	13.0217	33.0544	-5.50926	FALSE	FALSE	19	0.00617284	7.33985	4.85801	0.0067286
127	102	127	I	80	76	154	68	4.25	5.07	0	lalt	TRUE	0.811411	3	0	FALSE	8.81844	-1.13466	36.7181	FALSE	FALSE	12	0.0184049	5.76377	4.86224	0.00461599
128	102	128	I	80	0	168	107	4.38	4.63	0	lalt	TRUE	0.892311	3	0	FALSE	-3.03227	-8.66692	-9.18641	FALSE	FALSE	14	0.0121951	6.35755	4.86943	0.00310314
129	102	129	I	80	3	121	112	4.09	5.44	1	ralt	TRUE	1.43919	3	0	FALSE	7.72329	13.0459	-4.53918	FALSE	FALSE	15	0.0787879	3.66588	4.86188	0.00210113
130	102	130	O	40	138	154	91	3.62	3.71	1	lalt	FALSE	1.22605	3	0	FALSE	14.1834	8.25651	-9.30629	FALSE	FALSE	22	0.060241	4.05311	4.85665	0.000637991
131	102	131	D	80	3	121	112	3.73	3.84	0	lalt	TRUE	0.630194	3	0	FALSE	-4.29278	-6.96498	1.59999	FALSE	FALSE	9	0.0179641	5.79874	4.86099	0.00160706
132	102	132	T	40	157	193	131	4.37	3.64	1	lalt	FALSE	1.92208	3	0	FALSE	1.88667	-4.7962	-8.4566	FALSE	FALSE	31	0.0535714	4.22239	4.85678	0.00164249
133	102	133	I	80	3	121	112	5.09	3.94	1	ralt	TRUE	0.815188	3	0.236	FALSE	8.84541	4.60438	5.2917	FALSE	FALSE	15	0.0828402	3.59352	4.84907	0.000650405
134	102	134	T	40	157	193	131	4.97	3.55	1	ralt	TRUE	1.60807	3	0	FALSE	-4.27736	-5.35988	4.87409	FALSE	FALSE	31	0.0588235	4.08746	4.84424	0.000603377
135	102	135	O	40	138	154	91	5.39	3.58	1	lalt	FALSE	0.962021	3	0	FALSE	-5.81948	-10.7015	5.77162	FALSE	FALSE	22	0.0643275	3.95842	4.83874	0.00067798
136	102	136	O	40	76	154	68	5.23	3.88	0	lalt	TRUE	1.61891	3	0	FALSE	-1.65156	-1.21307	-10.8381	FALSE	FALSE	18	0.0232558	5.42626	4.8412	0.00123591
137	102	137	R	20	76	154	68	5.3	4.81	1	ralt	TRUE	2.20073	3	0.116857	FALSE	4.4402	6.13306	-3.58076	FALSE	FALSE	24	0.0693642	3.84967	4.83519	0.00119967
138	102	138	T	40	0	168	107	4.67	4.22	0	ralt	FALSE	1.62547	3	0	FALSE	4.65272	5.82315	1.64062	FALSE	FALSE	32	0.0114943	6.44294	4.84261	0.00202335
139	102	139	I	80	75	124	89	3.64	3.65	0	lalt	TRUE	0.879389	3	0	FALSE	3.92515	-9.83612	0.430914	FALSE	FALSE	17	0.0228571	5.45121	4.84515	0.00262851
140	102	140	A	20	76	154	68	4.91	4.84	0	lalt	TRUE	1.44051	3	0	FALSE	-3.69	-0.220569	-6.01285	FALSE	FALSE	0	0.0113636	6.45943	4.85253	0.00261419
141	102	141	I	80	138	154	91	3.77	5.45	0	lalt	TRUE	0.39045	3	0	FALSE	13.1928	3.85137	-4.65445	FALSE	FALSE	16	0.0225989	5.46761	4.85507	0.00260003
142	102	142	A	20	76	154	68	4.95	4.11	0	lalt	TRUE	0.672389	3	0.104857	FALSE	4.3046	19.4376	-6.12207	FALSE	FALSE	0	0.0168539	5.89077	4.85966	0.00205676
143	102	143	O	40	138	154	91	5.12	4.08	1	lalt	FALSE	0.8023	3	0	FALSE	-0.0361875	-13.1979	9.06015	FALSE	FALSE	22	0.0670391	3.89885	4.85402	0.00144341
144	102	144	R	20	75	124	89	3.87	3.55	0	missing	FALSE		3	0	FALSE	5.78074	16.2014	-1.856	TRUE	TRUE	29	0.0111111	6.49185	4.86136	0.00195935
145	102	145	I	80	0	168	107	5.27	4.9	0	lalt	TRUE	0.797179	3	0	FALSE	-0.871662	0.57409	-16.625	FALSE	FALSE	14	0.0165746	5.91488	4.86598	0.0028224
146	102	146	T	40	157	193	131	4.67	4.49	1	ralt	TRUE	2.46089	3	0.135143	FALSE	11.7972	17.9355	-7.96136	FALSE	FALSE	31	0.0604396	4.04836	4.86119	0.00144944
147	102	147	O	40	138	154	91	4.04	5.06	1	ralt	TRUE	0.865724	3	0	FALSE	15.7144	11.0249	-15.1685	FALSE	FALSE	22	0.0710383	3.81526	4.85523	0.000554333
148	102	148	T	40	138	154	91	5.44	4.72	0	ralt	FALSE	0.953739	3	0	FALSE	9.26134	17.4007	-7.1934	FALSE	FALSE	34	0.0163043	5.9386	4.85993	0.00138304
149	102	149	T	40	157	193	131	4.28	3.65	1	ralt	TRUE	0.716584	3	0	FALSE	22.3099	30.8399	-9.55871	FALSE	FALSE	31	0.0648649	3.94642	4.85473	0.00139967
150	102	150	A	20	75	124	89	4.03	4.88	1	ralt	TRUE	1.46455	3	0	FALSE	4.39419	-10.0735	14.7453	FALSE	FALSE	5	0.0645161	3.9542	4.84962	0.000542657
151	102	151	O	40	0	168	107	4.28	5.23	0	lalt	TRUE	1.61946	3	0	FALSE	1.76173	-1.80124	-14.2539	FALSE	FALSE	20	0.0213904	5.54689	4.85246	0.001117
152	102	152	A	20	3	121	112	3.96	4.81	0	lalt	TRUE	1.25331	3	0.0582857	FALSE	17.7412	11.1467	-21.0368	FALSE	FALSE	3	0.0159574	5.96963	4.85724	0.00195251
153	102	153	D	80	0	168	107	3.81	5.47	1	ralt	TRUE	1.52621	3	0.0171429	FALSE	9.53229	6.09105	-16.1137	FALSE	FALSE	8	0.0687831	3.8618	4.85174	0.00134884
154	102	154	I	80	157	193	131	4.84	4.8	0	lalt	TRUE	1.51306	3	0	FALSE	-4.08316	-6.81414	32.2321	FALSE	FALSE	13	0.0105263	6.56986	4.85912	0.00183821
155	102	155	D	80	76	154	68	4.7	4.83	0	missing	FALSE		3	0.129429	FALSE	-1.31387	-2.74629	-8.52179	TRUE	TRUE	6	0.0157068	5.99247	4.86391	0.00267976
156	102	156	A	20	75	124	89	5.44	4.64	1	ralt	TRUE	2.26458	3	0.154	FALSE	0.603248	31.5248	-24.2102	FALSE	FALSE	5	0.0677083	3.88452	4.85857	0.00132911
157	102	157	I	80	3	121	112	4.43	5.09	1	lalt	FALSE	0.421459	3	0.105714	FALSE	4.08595	11.423	-9.19982	FALSE	FALSE	15	0.0777202	3.68557	4.8523	0.000444315
158	102	158	O	40	138	154	91	4.44	3.93	1	missing	FALSE		3	0	FALSE	4.7935	0.00690286	-3.53056	TRUE	TRUE	22	0.0721649	3.79256	4.84663	0.00042306
159	102	159	A	20	0	168	107	5.49	4.37	0	lalt	TRUE	0.673164	3	0	FALSE	-5.76201	-13.7719	5.04205	FALSE	FALSE	2	0.0205128	5.60733	4.84968	0.00103298
160	102	160	T	40	157	193	131	4.56	4.65	1	ralt	TRUE	0.943077	3	0	FALSE	13.5995	3.20303	-31.0105	FALSE	FALSE	31	0.0663265	3.91427	4.84467	0.00104729
161	102	161	D	80	0	168	107	3.85	5.25	1	ralt	TRUE	0.674986	3	0.129143	FALSE	15.2809	23.9406	-2.27309	FALSE	FALSE	8	0.071066	3.8147	4.83923	0.000453466
162	102	162	O	40	138	154	91	3.96	5.2	1	ralt	TRUE	0.741968	3	0.120571	FALSE	3.88426	-3.58995	10.2225	FALSE	FALSE	22	0.0757576	3.72247	4.8334	0.000416071
163	102	163	T	40	157	193	131	4.08	4.6	1	ralt	TRUE	0.800016	3	0	FALSE	-4.39719	11.999	-2.43618	FALSE	FALSE	31	0.0703518	3.82927	4.82815	0.000414358
164	102	164	D	80	157	193	131	4	3.74	0	lalt	TRUE	1.28381	3	0	FALSE	-11.2987	0.399217	3.58421	FALSE	FALSE	7	0.01	6.64386	4.83565	0.00173175
165	102	165	R	20	76	154	68	5.29	4.4	1	ralt	TRUE	1.76481	3	0.177143	FALSE	-2.26042	-2.25393	-7.58326	FALSE	FALSE	24	0.0646766	3.95061	4.83102	0.00174223
166	102	166	D	80	157	193	131	5.42	3.9	0	lalt	TRUE	0.60969	3	0	FALSE	3.61458	12.8539	0.92925	FALSE	FALSE	7	0.0148515	6.07325	4.83608	0.00126732
167	102	167	A	20	75	124	89	4.08	4.51	1	missing	FALSE		3	0.0637143	FALSE	4.48682	23.8775	-13.5436	TRUE	TRUE	5	0.0689655	3.85798	4.83106	0.00124293
168	102	168	I	80	0	168	107	4.39	4.55	0	lalt	TRUE	0.882429	3	0	FALSE	6.32701	-0.194177	14.4732	FALSE	FALSE	14	0.0196078	5.67243	4.83437	0.00099082
169	102	169	A	20	75	124	89	4.25	4.07	1	ralt	TRUE	0.748412	3	0.134857	FALSE	4.74423	19.9031	-20.4058	FALSE	FALSE	5	0.0731707	3.77259	4.829	0.000970402
170	102	170	O	40	138	154	91	4.44	3.96	1	ralt	TRUE	1.64432	3	0.134286	FALSE	-2.67278	-11.7586	-11.4897	FALSE	FALSE	22	0.0776699	3.6865	4.82328	0.000372943
171	102	171	T	40	3	121	112	4.16	4.75	0	lalt	TRUE	0.857344	3	0.135429	FALSE	10.3049	26.4697	2.88765	FALSE	FALSE	33	0.0144928	6.10852	4.82843	0.0011907
172	102	172	D	80	76	154	68	5.06	4	0	lalt	TRUE	0.964216	3	0.120571	FALSE	9.66889	-13.5416	3.08923	FALSE	FALSE	6	0.0192308	5.70044	4.83182	0.00177276
173	102	173	T	40	157	193	131	5	5.01	1	ralt	TRUE	2.2221	3	0.165714	FALSE	1.20597	20.8591	-26.1667	FALSE	FALSE	31	0.0717703	3.80047	4.82671	0.000953205
174	102	174	A	20	75	124	89	4.54	4.23	1	ralt	TRUE	2.1158	3	0.329143	FALSE	-7.30377	-3.77038	34.6064	FALSE	FALSE	5	0.0761905	3.71425	4.82124	0.000367141
175	102	175	R	20	76	154	68	5.02	4.38	1	ralt	TRUE	1.09482	3	0	FALSE	-16.0114	-33.0207	17.7798	FALSE	FALSE	24	0.0663507	3.91374	4.81674	0.000381211
176	102	176	T	40	75	124	89	4.99	4.43	0	lalt	TRUE	1.99261	3	0.115714	FALSE	27.9398	-16.6015	-10.2847	FALSE	FALSE	35	0.0141509	6.14296	4.82196	0.00119325
177	102	177	O	40	138	154	91	3.64	5.13	1	ralt	TRUE	0.850513	3	0	FALSE	12.2277	14.0547	-24.0269	FALSE	FALSE	22	0.0798122	3.64725	4.81629	0.00114725
178	102	178	O	40	157	193	131	3.8	4.28	0	lalt	TRUE	0.880499	3	0	FALSE	-5.43173	-15.9775	16.0501	FALSE	FALSE	19	0.00934579	6.74147	4.82381	0.00158285
179	102	179	T	40	75	124	89	5.27	5.09	0	lalt	TRUE	2.39237	3	0	FALSE	11.1152	4.99362	-11.7065	FALSE	FALSE	35	0.0186047	5.74819	4.82733	0.002156
180	102	180	A	20	138	154	91	5.43	3.61	0	lalt	TRUE	0.74446	4	0	FALSE	-8.0573	-15.3649	17.7912	FALSE	FALSE	4	0.0138889	6.16993	4.83253	0.00170978
181	102	181	R	20	138	154	91	4.32	3.77	0	lalt	TRUE	0.887416	4	0	FALSE	1.19658	-3.40833	-2.14455	FALSE	FALSE	28	0.0138249	6.17659	4.83771	0.00193391
182	102	182	D	80	3	121	112	3.66	5.38	0	ralt	FALSE	1.49839	4	0.176571	FALSE	0.949618	6.92502	2.90963	FALSE	FALSE	9	0.0183486	5.76818	4.84122	0.00169472
183	102	183	D	80	0	168	107	3.73	4.92	1	ralt	TRUE	0.931318	4	0	FALSE	9.08541	10.2833	-11.1422	FALSE	FALSE	8	0.0684932	3.8679	4.83659	0.000912752
184	102	184	R	20	76	154	68	3.76	4.55	1	ralt	TRUE	1.02727	4	0	FALSE	3.38872	-16.4871	0.367787	FALSE	FALSE	24	0.0681818	3.87447	4.83204	0.000366405
185	102	185	I	80	76	154	68	4.74	4.94	0	lalt	TRUE	0.932222	4	0	FALSE	-2.02489	-4.2173	-5.18934	FALSE	FALSE	12	0.0180995	5.7879	4.83561	0.000905068
186	102	186	I	80	3	121	112	4.63	3.9	1	ralt	TRUE	0.618206	4	0	FALSE	3.88896	-2.45633	6.21176	FALSE	FALSE	15	0.0720721	3.79442	4.83076	0.000888349
187	102	187	T	40	157	193	131	3.75	4.84	1	ralt	TRUE	1.75911	4	0.116	FALSE	3.91552	3.50898	1.15821	FALSE	FALSE	31	0.0717489	3.8009	4.82598	0.000336554
188	102	188	R	20	0	168	107	4.2	5.33	0	ralt	FALSE	1.30805	4	0	FALSE	11.6644	9.06003	-3.83721	FALSE	FALSE	26	0.0133929	6.22239	4.83123	0.00110546
189	102	189	R	20	76	154	68	3.56	4.26	1	ralt	TRUE	0.50095	4	0	FALSE	0.0544186	5.58715	-12.2153	FALSE	FALSE	24	0.0711111	3.81378	4.82655	0.00110082
190	102	190	O	40	3	121	112	3.8	3.7	0	lalt	TRUE	0.897988	4	0	FALSE	-1.93514	-9.66187	-0.78009	FALSE	FALSE	21	0.0176991	5.82018	4.8302	0.000873712
191	102	191	R	20	3	121	112	4.31	4.22	0	lalt	TRUE	0.524095	4	0	FALSE	0.277251	-1.80279	2.62871	FALSE	FALSE	27	0.00881057	6.82655	4.8376	0.00204565
192	102	192	A	20	75	124	89	5.18	5.07	1	ralt	TRUE	1.38604	4	0	FALSE	8.29943	2.07012	-0.230709	FALSE	FALSE	5	0.0745614	3.74543	4.83267	0.00148971
193	102	193	I	80	3	121	112	5.15	5.13	1	ralt	TRUE	0.286935	4	0	FALSE	9.12676	9.45447	-7.94723	FALSE	FALSE	15	0.0742358	3.75174	4.8278	0.000307084
194	102	194	R	20	76	154	68	5.27	3.64	1	ralt	TRUE	1.97365	4	0	FALSE	-3.55101	-17.474	10.0983	FALSE	FALSE	24	0.073913	3.75803	4.823	0.000305992
195	102	195	R	20	0	168	107	3.59	4.27	0	lalt	TRUE	1.40956	4	0	FALSE	-9.24154	2.44492	-4.41591	FALSE	FALSE	26	0.017316	5.85175	4.82673	0.000845088
196	102	196	O	40	75	124	89	4.47	3.83	0	lalt	TRUE	0.909526	4	0	FALSE	-1.02864	-6.45905	1.33025	FALSE	FALSE	23	0.00862069	6.85798	4.83412	0.00200293
197	102	197	T	40	157	193	131	4.56	5.17	1	ralt	TRUE	0.750606	4	0	FALSE	3.30233	1.33412	1.62826	FALSE	FALSE	31	0.0729614	3.77672	4.82944	0.00145904
198	102	198	T	40	0	168	107	4.93	5.1	0	ralt	FALSE	0.803495	4	0.126286	FALSE	-1.7537	1.74472	-12.2376	FALSE	FALSE	32	0.0128205	6.2854	4.83472	0.00104992
199	102	199	A	20	75	124	89	3.95	3.8	1	lalt	FALSE	1.76322	4	0.0111429	FALSE	-3.58099	-8.61083	10.958	FALSE	FALSE	5	0.0765957	3.70659	4.82979	0.00103607
200	102	200	A	20	75	124	89	3.95	3.57	1	ralt	TRUE	0.528327	4	0	FALSE	-10.2585	-7.63214	-0.625823	FALSE	FALSE	5	0.0805085	3.63472	4.8246	0.000600963
201	102	201	R	20	157	193	131	5.08	4.08	0	lalt	TRUE	0.926404	4	0	FALSE	10.0147	1.4222	7.2318	FALSE	FALSE	25	0.00843882	6.88874	4.83197	0.0014173
202	102	202	O	40	138	154	91	5.34	5.16	1	ralt	TRUE	1.02132	4	0	FALSE	-2.14046	5.52763	-6.30157	FALSE	FALSE	22	0.0756303	3.72489	4.82719	0.0014201
203	102	203	O	40	157	193	131	5.25	5.1	0	lalt	TRUE	1.51108	4	0	FALSE	-2.38123	0.208497	-7.33575	FALSE	FALSE	19	0.0125523	6.3159	4.8325	0.00101966
204	102	204	I	80	157	193	131	3.53	5.4	0	lalt	TRUE	0.370929	4	0	FALSE	5.12147	2.97471	-1.2374	FALSE	FALSE	13	0.0125	6.32193	4.83779	0.00175465
205	102	205	T	40	157	193	131	5.5	4.52	1	lalt	FALSE	1.24087	4	0	FALSE	3.23679	-9.21498	12.7573	FALSE	FALSE	31	0.0746888	3.74296	4.83312	0.00101165
206	102	206	T	40	157	193	131	5.22	4.25	1	ralt	TRUE	2.14961	4	0	FALSE	-2.46953	-10.5745	-0.154229	FALSE	FALSE	31	0.0785124	3.67094	4.82819	0.000587375
207	102	207	A	20	76	154	68	4.39	4.88	0	ralt	FALSE	1.69441	4	0	FALSE	0.325849	2.95966	-11.5336	FALSE	FALSE	0	0.0164609	5.92481	4.83201	0.000788408
208	102	208	T	40	3	121	112	4.3	5.25	0	lalt	TRUE	1.05428	4	0.113429	FALSE	3.44691	8.73898	-4.72217	FALSE	FALSE	33	0.0163934	5.93074	4.83583	0.00131449
209	102	209	A	20	75	124	89	5.17	5.12	1	ralt	TRUE	0.601223	4	0	FALSE	-2.97757	-3.051	3.97904	FALSE	FALSE	5	0.0816327	3.61471	4.83073	0.000774931
210	102	210	D	80	0	168	107	3.68	3.64	1	ralt	TRUE	0.935077	4	0.219429	FALSE	8.73794	-14.5398	-0.830416	FALSE	FALSE	8	0.0650407	3.94251	4.82697	0.000274935
211	102	211	T	40	0	168	107	3.75	4.27	0	lalt	TRUE	2.01906	4	0	FALSE	4.12528	0.919162	3.58148	FALSE	FALSE	32	0.0161943	5.94837	4.83083	0.000804117
212	102	212	R	20	3	121	112	4.98	4.51	0	lalt	TRUE	0.649121	4	0	FALSE	1.15932	-5.77028	17.0394	FALSE	FALSE	27	0.0120968	6.36923	4.83615	0.00149699
213	102	213	D	80	0	168	107	5.28	5.19	1	ralt	TRUE	2.26889	4	0	FALSE	-7.23432	-6.08636	9.29737	FALSE	FALSE	8	0.0682731	3.87254	4.83214	0.000989901
214	102	214	R	20	76	154	68	3.78	4.31	1	missing	FALSE		4	0	FALSE	-0.834678	-2.48074	-8.13803	TRUE	TRUE	24	0.072	3.79586	4.82786	0.000276572
215	102	215	O	40	138	154	91	5.46	4.08	1	ralt	TRUE	2.06043	4	0	FALSE	4.03048	1.66123	-5.50041	FALSE	FALSE	22	0.0756972	3.72362	4.82335	0.000258565
216	102	216	A	20	138	154	91	4.02	4.84	0	missing	FALSE		4	0	FALSE	2.68954	4.65737	10.714	TRUE	TRUE	4	0.015873	5.97728	4.82726	0.000762043
217	102	217	O	40	157	193	131	4.17	4.75	0	lalt	TRUE	1.09114	4	0.158857	FALSE	1.30735	-1.27675	-13.6908	FALSE	FALSE	19	0.0158103	5.98299	4.83116	0.00126957
218	102	218	R	20	76	154	68	3.56	5.47	1	ralt	TRUE	2.40892	4	0	FALSE	14.8807	11.9215	-5.48563	FALSE	FALSE	24	0.0748031	3.74076	4.82675	0.000756421
219	102	219	O	40	75	124	89	3.89	4.77	0	lalt	TRUE	2.10478	4	0	FALSE	-1.28242	-0.386119	-23.9021	FALSE	FALSE	23	0.0117647	6.40939	4.83209	0.000950943
220	102	220	D	80	0	168	107	5.33	4.39	1	ralt	TRUE	0.772728	4	0	FALSE	14.9987	13.0567	14.2944	FALSE	FALSE	8	0.0703125	3.83007	4.82805	0.000955338
221	102	221	T	40	138	154	91	4.14	4.26	0	ralt	FALSE	1.4196	4	0	FALSE	7.90766	-19.874	5.31416	FALSE	FALSE	34	0.0155642	6.00562	4.83198	0.000756032
222	102	222	D	80	0	168	107	3.51	5.12	1	ralt	TRUE	0.652531	4	0.104	FALSE	21.2967	20.1701	-19.185	FALSE	FALSE	8	0.0736434	3.7633	4.82772	0.00074542
223	102	223	I	80	157	193	131	5.28	4.12	0	lalt	TRUE	1.5245	4	0	FALSE	8.67033	-6.40131	-2.33029	FALSE	FALSE	13	0.015444	6.01681	4.83166	0.00074272
224	102	224	I	80	3	121	112	5.18	3.82	1	ralt	TRUE	0.765405	4	0.146571	FALSE	8.51377	5.78155	5.47082	FALSE	FALSE	15	0.0692308	3.85244	4.82777	0.00074784
225	102	225	A	20	3	121	112	3.91	4.49	0	lalt	TRUE	0.588489	4	0	FALSE	-1.91786	-6.44839	16.7913	FALSE	FALSE	3	0.0153257	6.02791	4.83173	0.000745148
226	102	226	O	40	138	154	91	4.13	5.39	1	ralt	TRUE	1.13738	4	0	FALSE	-7.34692	6.72669	-5.42485	FALSE	FALSE	22	0.0763359	3.71149	4.82734	0.000727754
227	102	227	R	20	157	193	131	3.97	5.21	0	lalt	TRUE	0.797293	4	0	FALSE	17.9563	33.2954	-20.5971	FALSE	FALSE	25	0.0114068	6.45396	4.83269	0.00091648
228	102	228	R	20	76	154	68	4.58	3.95	1	ralt	TRUE	1.08117	4	0	FALSE	5.3585	1.38538	-20.9159	FALSE	FALSE	24	0.0757576	3.72247	4.82838	0.000913179
229	102	229	O	40	75	124	89	4.16	3.67	0	lalt	TRUE	1.20315	4	0	FALSE	2.66979	-15.3558	2.74864	FALSE	FALSE	23	0.0150943	6.04985	4.83235	0.000720016
230	102	230	I	80	3	121	112	5.22	3.86	1	ralt	TRUE	1.67611	4	0	FALSE	-13.5164	-15.7597	29.8224	FALSE	FALSE	15	0.0714286	3.80735	4.82838	0.000724348
231	102	231	R	20	3	121	112	4.18	4.14	0	lalt	TRUE	0.63705	4	0	FALSE	3.2673	-28.41	-5.05426	FALSE	FALSE	27	0.0149813	6.0607	4.83237	0.000721798
232	102	232	D	80	157	193	131	5.48	5.3	0	lalt	TRUE	0.525088	4	0.243714	FALSE	8.68143	7.54323	-14.849	FALSE	FALSE	7	0.0149254	6.06609	4.83634	0.00120116
233	102	233	I	80	3	121	112	3.79	4.05	1	ralt	TRUE	0.318929	4	0	FALSE	5.34391	10.5197	3.98933	FALSE	FALSE	15	0.0743494	3.74953	4.8322	0.00070995
234	102	234	R	20	75	124	89	5.28	5.43	0	ralt	FALSE	0.823988	4	0	FALSE	33.2201	33.1227	-12.878	FALSE	FALSE	29	0.0111111	6.49185	4.83753	0.00089386
235	102	235	T	40	157	193	131	5.19	5.42	1	ralt	TRUE	1.49276	4	0.131143	FALSE	15.0383	12.3547	2.67294	FALSE	FALSE	31	0.0738007	3.76022	4.83345	0.000890719
236	102	236	R	20	138	154	91	4.18	4.45	0	lalt	TRUE	0.780519	4	0	FALSE	-0.609338	-7.78101	5.91137	FALSE	FALSE	28	0.0147059	6.08746	4.83744	0.000702583
237	102	237	D	80	0	168	107	5.12	4.13	1	ralt	TRUE	1.98438	4	0	FALSE	0.299498	-11.6503	4.06242	FALSE	FALSE	8	0.0732601	3.77083	4.83343	0.000700161
238	102	238	R	20	157	193	131	3.83	4.29	0	lalt	TRUE	0.416363	4	0	FALSE	6.22041	-4.48979	10.006	FALSE	FALSE	25	0.0145985	6.09803	4.83743	0.000697756
239	102	239	R	20	75	124	89	5.47	5.43	0	ralt	FALSE	0.893385	4	0	FALSE	-6.2437	-9.31907	-10.4024	FALSE	FALSE	29	0.0145455	6.10329	4.84142	0.00117169
240	103	0	I	20	3	121	112	4.31	4.86	0	lalt	FALSE	0.644524	1	0.122857	FALSE	1.2551	-0.893675	1.88603	FALSE	FALSE	15	0.0277778	5.16993	5.1554	0.0145257
241	103	1	T	40	3	121	112	4.65	4.48	0	lalt	FALSE	0.722602	1	0.0242857	FALSE	7.68597	-4.67289	0.0619486	FALSE	FALSE	33	0.027027	5.20945	5.14266	0.0272606
242	103	2	D	80	138	154	91	4	4.74	0	ralt	TRUE	0.866667	1	0.238857	FALSE	0.166818	-20.7192	10.3783	FALSE	FALSE	10	0.0263158	5.24793	5.13156	0.0266152
243	103	3	R	20	138	154	91	5.22	4.54	0	ralt	TRUE	0.709797	1	0.116571	FALSE	3.55048	-8.12065	4.05978	FALSE	FALSE	28	0.025641	5.2854	5.12193	0.0259994
244	103	4	O	80	138	154	91	4.98	5.04	0	ralt	TRUE	0.688865	1	0.253714	FALSE	-0.608298	-6.38104	-5.38228	FALSE	FALSE	22	0.025	5.32193	5.11365	0.0254112
245	103	5	A	40	3	121	112	5.06	5.1	0	lalt	FALSE	0.683903	1	0.468286	TRUE	8.15631	8.33945	4.56774	FALSE	FALSE	3	0.0243902	5.35755	5.1066	0.0248488
246	103	6	D	80	75	124	89	4.79	4.13	0	ralt	TRUE	1.29185	1	0.333714	FALSE	7.76159	-21.8658	12.0362	FALSE	FALSE	11	0.0238095	5.39232	5.10068	0.0243105
247	103	7	O	80	3	121	112	4.48	4.63	0	ralt	TRUE	0.961956	1	0.224571	FALSE	16.7346	-0.268373	-2.53928	FALSE	FALSE	21	0.0232558	5.42626	5.0958	0.0237949
248	103	8	T	40	76	154	68	3.64	4.03	0	ralt	TRUE	0.489979	1	0.123429	FALSE	6.18051	1.53328	5.48247	FALSE	FALSE	30	0.0227273	5.45943	5.09185	0.0233005
249	103	9	R	20	0	168	107	4.65	4.81	0	missing	FALSE		1	0.117429	FALSE	17.1426	17.3716	-4.72091	TRUE	TRUE	26	0.0222222	5.49185	5.08878	0.0228262
250	103	10	A	40	3	121	112	3.75	5.18	0	lalt	FALSE	0.858196	1	0.261714	FALSE	7.94315	-5.50873	6.14656	FALSE	FALSE	3	0.0434783	4.52356	5.07044	0.0171555
251	103	11	D	80	157	193	131	4.68	3.67	0	ralt	TRUE	0.498323	1	0.275714	FALSE	0.327839	-2.08528	-7.62313	FALSE	FALSE	7	0.0212766	5.55459	5.06924	0.0168263
252	103	12	A	40	157	193	131	4.49	4.72	1	ralt	FALSE	0.434518	1	0.228	FALSE	5.13344	6.55088	3.87864	FALSE	FALSE	1	0.0208333	5.58496	5.06869	0.0215117
253	103	13	T	40	157	193	131	5.08	4.15	0	ralt	TRUE	0.454588	1	0.231714	FALSE	-0.747411	-10.4107	5.47046	FALSE	FALSE	31	0.0204082	5.61471	5.06876	0.0211063
254	103	14	T	40	0	168	107	5.28	5.06	0	ralt	TRUE	0.954711	1	0.244571	FALSE	8.20757	-1.88332	0.40049	FALSE	FALSE	32	0.02	5.64386	5.06939	0.0207159
255	103	15	D	80	3	121	112	4.39	3.8	1	ralt	FALSE	0.608667	1	0.246286	FALSE	11.7761	-0.565336	7.4673	FALSE	FALSE	9	0.0196078	5.67243	5.07054	0.0203395
256	103	16	D	80	76	154	68	3.87	3.81	0	ralt	TRUE	0.567883	1	0.336857	FALSE	-8.4491	-18.3784	2.39094	FALSE	FALSE	6	0.0192308	5.70044	5.07217	0.0199766
257	103	17	A	40	75	124	89	3.6	4.61	0	lalt	FALSE	1.04803	1	0.732857	TRUE	2.95487	-1.5254	11.7601	FALSE	FALSE	5	0.0188679	5.72792	5.07424	0.0196263
258	103	18	T	40	138	154	91	5.09	4.07	1	ralt	FALSE	0.536229	1	0.159143	FALSE	10.1944	-2.45771	2.44917	FALSE	FALSE	34	0.0185185	5.75489	5.07673	0.019288
259	103	19	I	20	75	124	89	4.19	3.89	1	ralt	FALSE	0.806237	1	0.361429	FALSE	8.84174	-1.02088	-10.6507	FALSE	FALSE	17	0.0181818	5.78136	5.07959	0.0189612
260	103	20	O	80	0	168	107	4.42	5.47	1	ralt	FALSE	0.501484	1	0.343429	FALSE	8.49674	-6.1132	2.21011	FALSE	FALSE	20	0.0178571	5.80735	5.0828	0.0186451
261	103	21	D	80	76	154	68	4.69	5.42	0	lalt	FALSE	0.47556	1	0.416857	TRUE	1.79971	-9.58353	-0.450806	FALSE	FALSE	6	0.0350877	4.83289	5.07333	0.0141134
262	103	22	I	20	75	124	89	3.79	3.88	1	lalt	TRUE	0.767532	1	0.372571	FALSE	4.80607	5.16046	3.85589	FALSE	FALSE	17	0.0344828	4.85798	5.0646	0.00973468
263	103	23	T	40	138	154	91	4.79	5.16	1	lalt	TRUE	0.692753	1	0.145429	FALSE	3.90058	-7.36545	6.65155	FALSE	FALSE	34	0.0338983	4.88264	5.05656	0.00958665
264	103	24	T	40	138	154	91	3.84	5.19	1	lalt	TRUE	0.58483	1	0.260571	FALSE	1.68756	-4.03217	5.74224	FALSE	FALSE	34	0.05	4.32193	5.04115	0.0174795
265	103	25	I	20	75	124	89	4.08	3.75	1	ralt	FALSE	0.571934	1	0.116857	FALSE	11.7387	-1.8677	-2.40276	FALSE	FALSE	17	0.0491803	4.34577	5.02662	0.00624751
266	103	26	A	40	157	193	131	5.33	4.44	1	ralt	FALSE	0.606154	1	0.352571	FALSE	1.73158	-3.119	2.01782	FALSE	FALSE	1	0.0322581	4.9542	5.0207	0.00766436
267	103	27	A	40	157	193	131	3.6	4.77	1	lalt	TRUE	0.438212	1	0.230571	FALSE	8.25121	16.897	-11.2295	FALSE	FALSE	1	0.047619	4.39232	5.00766	0.0166963
268	103	28	O	80	0	168	107	4.84	5.48	1	lalt	TRUE	0.973345	1	0.256857	FALSE	11.4954	-3.60244	6.27964	FALSE	FALSE	20	0.03125	5	5.00291	0.00745115
269	103	29	A	40	157	193	131	4.5	5.5	1	lalt	TRUE	0.468337	1	0.238286	FALSE	-4.1089	-13.4367	10.1836	FALSE	FALSE	1	0.0615385	4.02237	4.98569	0.00658358
270	103	30	I	20	75	124	89	4.75	4.01	1	lalt	TRUE	0.387422	1	0.119143	FALSE	-0.935192	-5.22741	2.34939	FALSE	FALSE	17	0.0606061	4.04439	4.96931	0.00432759
271	103	31	I	20	157	193	131	3.75	3.63	0	lalt	FALSE	0.308536	1	0.237714	FALSE	1.28082	-6.26219	10.6104	FALSE	FALSE	13	0.0149254	6.06609	4.9774	0.0100142
272	103	32	A	40	138	154	91	3.71	4.23	0	ralt	TRUE	0.615813	1	0.0614286	FALSE	6.8246	-0.9224	0.483853	FALSE	FALSE	4	0.0147059	6.08746	4.98557	0.0155357
273	103	33	I	20	3	121	112	3.86	4.81	0	ralt	TRUE	0.566933	1	0.114571	FALSE	4.80646	3.67086	2.3726	FALSE	FALSE	15	0.0289855	5.10852	4.98301	0.0118211
274	103	34	A	40	157	193	131	4.94	3.55	1	lalt	TRUE	0.601057	1	0.312571	FALSE	5.72627	-6.88342	-13.1871	FALSE	FALSE	1	0.0714286	3.80735	4.96469	0.00572232
275	103	35	O	80	0	168	107	4.92	3.68	1	lalt	TRUE	0.820271	1	0.382	FALSE	-0.60296	-2.36764	10.0182	FALSE	FALSE	20	0.0422535	4.56478	4.95626	0.00433519
276	103	36	D	80	138	154	91	4.11	5.43	0	ralt	TRUE	1.04937	1	0.302	FALSE	4.51864	-18.1285	16.4814	FALSE	FALSE	10	0.0277778	5.16993	4.95504	0.0067039
277	103	37	R	20	76	154	68	3.84	4.14	1	ralt	FALSE	0.801441	1	0.357143	FALSE	15.6906	6.284	-11.3438	FALSE	FALSE	24	0.0136986	6.18982	4.96433	0.0112134
278	103	38	A	40	0	168	107	4.43	4.31	0	ralt	TRUE	0.948661	1	0.111143	FALSE	3.88501	-11.0277	1.55801	FALSE	FALSE	2	0.0135135	6.20945	4.97363	0.0143392
279	103	39	D	80	3	121	112	4.6	3.76	1	lalt	TRUE	0.887718	1	0.117143	FALSE	5.92457	-16.3103	7.81845	FALSE	FALSE	9	0.0266667	5.22882	4.97301	0.0109323
280	103	40	T	40	138	154	91	4.84	4.96	1	ralt	FALSE	0.83687	1	0.372857	FALSE	2.97664	1.86273	8.35889	FALSE	FALSE	34	0.0526316	4.24793	4.96155	0.00572732
281	103	41	T	40	138	154	91	3.85	5.46	1	lalt	TRUE	0.25792	1	0.218857	FALSE	5.20474	-8.04922	-3.87475	FALSE	FALSE	34	0.0649351	3.94486	4.94689	0.00752241
282	103	42	O	80	0	168	107	3.88	3.53	1	lalt	TRUE	0.966068	1	0.602571	TRUE	1.05283	-8.93227	8.50513	FALSE	FALSE	20	0.0512821	4.2854	4.93652	0.00335829
283	103	43	O	80	0	168	107	3.96	4	1	lalt	TRUE	0.462249	1	0.616857	TRUE	5.44894	29.0936	-24.7637	FALSE	FALSE	20	0.0632911	3.98185	4.92301	0.00734631
284	103	44	D	80	3	121	112	5.24	5.35	1	ralt	FALSE	1.55638	1	0.347429	FALSE	1.5473	-11.7143	9.98199	FALSE	FALSE	9	0.0375	4.73697	4.91814	0.00391045
285	103	45	R	20	76	154	68	5.12	4.4	1	lalt	TRUE	0.720323	1	0.00885714	FALSE	9.44023	1.81879	-11.3419	FALSE	FALSE	24	0.0246914	5.33985	4.91958	0.00602289
286	103	46	I	20	75	124	89	4.44	5.42	1	ralt	FALSE	1.06145	1	0.123143	FALSE	10.0283	-2.05901	9.23102	FALSE	FALSE	17	0.0609756	4.03562	4.90741	0.00496833
287	103	47	I	20	157	193	131	4.06	5.4	0	lalt	FALSE	0.473479	1	0.114571	FALSE	11.5894	-0.362322	-1.09461	FALSE	FALSE	13	0.0240964	5.37504	4.90936	0.00491427
288	103	48	I	20	138	154	91	5.32	4.4	0	lalt	FALSE	0.347575	1	0.111143	FALSE	8.044	5.95432	1.86514	FALSE	FALSE	16	0.0119048	6.39232	4.92035	0.00982364
289	103	49	R	20	157	193	131	4.33	4.69	0	ralt	TRUE	1.00249	1	0.533429	TRUE	2.11578	-15.4346	8.58219	FALSE	FALSE	25	0.0117647	6.40939	4.93128	0.0125643
290	103	50	T	40	0	168	107	3.62	3.65	0	ralt	TRUE	1.04364	1	0.122857	FALSE	8.45294	-7.26374	-3.61379	FALSE	FALSE	32	0.0232558	5.42626	4.93348	0.00960707
291	103	51	I	20	75	124	89	5.19	4.85	1	lalt	TRUE	0.806858	1	0.118	FALSE	4.58413	-5.09494	-5.8702	FALSE	FALSE	17	0.0689655	3.85798	4.92006	0.00446535
292	103	52	O	80	157	193	131	5.44	4.41	0	ralt	TRUE	0.942923	1	0.29	FALSE	-0.87824	-11.783	11.1348	FALSE	FALSE	19	0.0113636	6.45943	4.93118	0.00717351
293	103	53	I	20	157	193	131	4.78	3.68	0	ralt	TRUE	1.69281	1	0.118857	FALSE	12.8946	6.71647	-4.00703	FALSE	FALSE	13	0.0337079	4.89077	4.92841	0.00824686
294	103	54	A	40	0	168	107	3.61	3.56	0	ralt	TRUE	0.829976	1	0.114	FALSE	10.9213	-4.99393	-2.71976	FALSE	FALSE	2	0.0222222	5.49185	4.93126	0.00546668
295	103	55	O	80	0	168	107	4.4	3.73	1	ralt	FALSE	1.02919	1	0.381714	FALSE	4.32117	-4.35772	3.76276	FALSE	FALSE	20	0.0659341	3.92283	4.91914	0.00428717
296	103	56	D	80	0	168	107	3.57	4.52	0	lalt	FALSE	0.741359	1	0.115714	FALSE	5.17044	-2.69205	6.29565	FALSE	FALSE	8	0.0108696	6.52356	4.93048	0.00688042
297	103	57	D	80	3	121	112	5.24	4.94	1	lalt	TRUE	0.50355	1	0.358571	FALSE	3.19158	1.81337	-7.99013	FALSE	FALSE	9	0.0430108	4.53916	4.92463	0.00737353
298	103	58	I	20	75	124	89	3.89	4.63	1	lalt	TRUE	1.07855	1	0.512857	TRUE	-10.7227	-16.3379	0.850646	FALSE	FALSE	17	0.0744681	3.74723	4.91128	0.00246953
299	103	59	D	80	3	121	112	5.39	3.63	1	ralt	FALSE	1.46063	1	0.428571	TRUE	2.14835	-7.41841	4.65594	FALSE	FALSE	9	0.0526316	4.24793	4.90304	0.00211976
300	103	60	T	40	75	124	89	3.58	5.37	0	ralt	TRUE	0.975238	2	0.837714	TRUE	1.43348	0.828328	3.1964	FALSE	FALSE	35	0.0104167	6.58496	4.91471	0.00683149
301	103	61	A	40	157	193	131	5.46	3.69	1	ralt	FALSE	1.00827	2	0.37	FALSE	3.29765	-0.236033	18.2696	FALSE	FALSE	1	0.0618557	4.01495	4.90444	0.00654599
302	103	62	A	40	0	168	107	5.06	4.42	0	ralt	TRUE	0.667385	2	0.122571	FALSE	2.45198	5.92224	-11.7099	FALSE	FALSE	2	0.0306122	5.02975	4.90358	0.00305013
303	103	63	O	80	0	168	107	5.07	4.38	1	lalt	TRUE	0.800445	2	0.126	FALSE	11.6076	-2.10279	-0.178139	FALSE	FALSE	20	0.0707071	3.822	4.89185	0.00286676
304	103	64	O	80	76	154	68	4.24	3.69	0	ralt	TRUE	1.30848	2	0.136571	FALSE	3.10505	-1.498	-1.51496	FALSE	FALSE	18	0.01	6.64386	4.90375	0.00620613
305	103	65	R	20	76	154	68	4.99	4.16	1	lalt	TRUE	0.574674	2	0.113143	FALSE	-7.6732	-6.06682	4.54439	FALSE	FALSE	24	0.029703	5.07325	4.90335	0.00731467
306	103	66	R	20	76	154	68	4.07	4.55	1	lalt	TRUE	1.13572	2	0.235714	FALSE	-0.128048	-9.88318	7.72095	FALSE	FALSE	24	0.0392157	4.67243	4.89956	0.00748598
307	103	67	D	80	0	168	107	4.03	4.5	0	lalt	FALSE	0.819835	2	0.258857	FALSE	5.78468	2.9092	5.57313	FALSE	FALSE	8	0.0194175	5.6865	4.90419	0.00433685
308	103	68	D	80	75	124	89	5.02	3.5	0	lalt	FALSE	0.817975	2	0.253714	FALSE	16.4511	9.36296	-7.69113	FALSE	FALSE	11	0.0192308	5.70044	4.90887	0.00568144
309	103	69	D	80	3	121	112	4.76	4.4	1	lalt	TRUE	0.538108	2	0.261714	FALSE	16.2068	15.9343	-5.07322	FALSE	FALSE	9	0.0571429	4.12928	4.9005	0.0037611
310	103	70	O	80	0	168	107	4.97	4.15	1	lalt	TRUE	0.749234	2	0.124571	FALSE	-3.61897	-21.5508	19.8963	FALSE	FALSE	20	0.0754717	3.72792	4.88879	0.00162033
311	103	71	R	20	3	121	112	5.46	3.54	0	ralt	TRUE	0.669317	2	0.186	FALSE	11.2793	-6.6662	-0.0549925	FALSE	FALSE	27	0.00934579	6.74147	4.90085	0.00571189
312	103	72	R	20	75	124	89	4.75	4.91	0	ralt	TRUE	0.593443	2	0.128286	FALSE	12.244	2.13581	-11.7651	FALSE	FALSE	29	0.00925926	6.75489	4.91281	0.00997991
313	103	73	D	80	3	121	112	3.66	3.97	1	ralt	FALSE	0.957476	2	0.437429	TRUE	-1.02319	-6.72276	17.7772	FALSE	FALSE	9	0.0642202	3.96083	4.90332	0.00572016
314	103	74	T	40	3	121	112	5.47	4.9	0	ralt	TRUE	0.820644	2	0.229143	FALSE	2.8641	-11.7016	6.42108	FALSE	FALSE	33	0.0181818	5.78136	4.90848	0.00346259
315	103	75	T	40	3	121	112	4.48	3.89	0	ralt	TRUE	0.983641	2	0.133429	FALSE	2.87723	2.43121	-6.84562	FALSE	FALSE	33	0.027027	5.20945	4.90928	0.00971908
316	103	76	R	20	75	124	89	4.64	3.56	0	ralt	TRUE	0.591717	2	0.126286	FALSE	4.08745	-4.95142	-6.64819	FALSE	FALSE	29	0.0178571	5.80735	4.91452	0.00445847
317	103	77	I	20	75	124	89	4.74	4.64	1	ralt	FALSE	0.591981	2	0.208571	FALSE	5.36234	-0.406566	3.53512	FALSE	FALSE	17	0.0707965	3.82018	4.90422	0.00327379
318	103	78	T	40	138	154	91	4.93	3.76	1	ralt	FALSE	0.97406	2	0.214	FALSE	10.2501	-3.71261	5.06543	FALSE	FALSE	34	0.0526316	4.24793	4.89757	0.00152432
319	103	79	I	20	75	124	89	4.35	3.99	1	lalt	TRUE	0.670154	2	0.255714	FALSE	1.7814	-1.95479	-9.22707	FALSE	FALSE	17	0.0782609	3.67557	4.88643	0.00143297
320	103	80	D	80	138	154	91	3.94	4.12	0	lalt	FALSE	0.852232	2	0.713143	TRUE	14.7429	17.9443	-10.0036	FALSE	FALSE	10	0.0258621	5.27302	4.88793	0.00230636
321	103	81	I	20	3	121	112	4.14	4.31	0	ralt	TRUE	0.818524	2	0.292286	FALSE	12.3472	14.1398	-0.844702	FALSE	FALSE	15	0.025641	5.2854	4.8895	0.00347608
322	103	82	O	80	75	124	89	4.2	4.14	0	ralt	TRUE	0.886616	2	0.133143	FALSE	8.80147	4.77883	0.244428	FALSE	FALSE	23	0.00847458	6.88264	4.90162	0.00630452
323	103	83	I	20	75	124	89	3.97	4.12	1	lalt	TRUE	0.612766	2	0.152857	FALSE	-8.26811	-0.355414	3.82335	FALSE	FALSE	17	0.0840336	3.57289	4.89002	0.00502361
324	103	84	R	20	76	154	68	5.46	4.71	1	lalt	TRUE	0.842949	2	0.254	FALSE	14.6452	0.474733	-16.0359	FALSE	FALSE	24	0.0416667	4.58496	4.88642	0.00149787
325	103	85	D	80	76	154	68	3.77	4.52	0	ralt	TRUE	0.587953	2	0.134	FALSE	6.1091	6.38598	-4.74506	FALSE	FALSE	6	0.0247934	5.3339	4.88836	0.00269716
326	103	86	A	40	3	121	112	3.95	3.78	0	ralt	TRUE	0.55613	2	0.367143	FALSE	12.7663	-5.05728	4.97305	FALSE	FALSE	3	0.0245902	5.34577	4.89036	0.00334304
327	103	87	D	80	3	121	112	4.02	4.86	1	lalt	TRUE	1.1393	2	0.242857	FALSE	11.3906	-16.4411	16.6872	FALSE	FALSE	9	0.0650407	3.94251	4.88206	0.0022626
328	103	88	D	80	3	121	112	4.63	4.35	1	lalt	TRUE	0.532424	2	0.0242857	FALSE	-4.29587	-8.34112	11.5901	FALSE	FALSE	9	0.0725806	3.78427	4.87271	0.00248447
329	103	89	R	20	76	154	68	3.75	4.79	1	lalt	TRUE	0.292529	2	0.129429	FALSE	-6.13745	-17.2553	-5.9515	FALSE	FALSE	24	0.048	4.38082	4.86794	0.00133526
330	103	90	A	40	157	193	131	4.54	4.11	1	lalt	TRUE	0.70169	2	0.194857	FALSE	1.68898	9.35317	-11.6585	FALSE	FALSE	1	0.0555556	4.16993	4.86172	0.00149257
331	103	91	O	80	3	121	112	3.68	4.31	0	ralt	TRUE	0.729829	2	0.365714	FALSE	-6.57951	-34.8795	41.9355	FALSE	FALSE	21	0.015748	5.98868	4.86813	0.0030303
332	103	92	I	20	76	154	68	5.01	4.69	0	ralt	TRUE	0.789015	2	0.121429	FALSE	3.77676	-7.34554	4.3605	FALSE	FALSE	12	0.0078125	7	4.88038	0.00656509
333	103	93	T	40	157	193	131	4.35	4.32	0	ralt	TRUE	0.667066	2	0.152571	FALSE	-3.12947	-4.91949	-5.58159	FALSE	FALSE	31	0.0155039	6.01123	4.88672	0.00651594
334	103	94	D	80	3	121	112	3.7	3.87	1	lalt	TRUE	1.07115	2	0.381714	FALSE	13.9635	9.91491	3.25037	FALSE	FALSE	9	0.0769231	3.70044	4.87717	0.00274644
335	103	95	R	20	76	154	68	4.59	3.65	1	lalt	TRUE	0.401366	2	0.172857	FALSE	8.19366	-5.73361	-4.5522	FALSE	FALSE	24	0.0534351	4.22607	4.87153	0.00110778
336	103	96	O	80	0	168	107	4.55	4.74	1	lalt	TRUE	0.729553	2	0.245143	FALSE	3.3765	2.60898	2.09678	FALSE	FALSE	20	0.0681818	3.87447	4.8635	0.00115704
337	103	97	A	40	157	193	131	3.63	4.66	1	lalt	TRUE	0.430643	2	0.120286	FALSE	-2.86799	2.77456	-0.986342	FALSE	FALSE	1	0.0601504	4.05528	4.85686	0.00106132
338	103	98	A	40	75	124	89	5.3	4.66	0	ralt	TRUE	0.476803	2	0.259714	FALSE	8.43684	-8.17213	9.02706	FALSE	FALSE	5	0.0149254	6.06609	4.86354	0.00279434
339	103	99	A	40	157	193	131	4.56	5.14	1	lalt	TRUE	0.384878	2	0.137714	FALSE	0.652343	18.3397	-12.2193	FALSE	FALSE	1	0.0666667	3.90689	4.85598	0.00270663
340	103	100	O	80	138	154	91	4.96	3.72	0	ralt	TRUE	1.0888	2	0.272286	FALSE	11.6846	-10.3563	-12.1949	FALSE	FALSE	22	0.0147059	6.08746	4.86273	0.00268803
341	103	101	R	20	75	124	89	4.33	4.37	0	ralt	TRUE	0.865007	2	0.138571	FALSE	-4.05014	-25.9785	8.80361	FALSE	FALSE	29	0.0218978	5.51307	4.8659	0.00368503
342	103	102	O	80	0	168	107	4.65	3.82	1	lalt	TRUE	1.42009	2	0.378	FALSE	5.76871	-10.5794	23.5154	FALSE	FALSE	20	0.0724638	3.7866	4.85767	0.00191611
343	103	103	R	20	76	154	68	5.34	5.38	1	lalt	TRUE	0.40825	2	0.224857	FALSE	2.7703	-1.13091	2.72394	FALSE	FALSE	24	0.057554	4.11894	4.85181	0.000969038
344	103	104	T	40	138	154	91	4.14	3.92	1	lalt	TRUE	1.08921	2	0.271143	FALSE	4.6492	-17.8612	12.478	FALSE	FALSE	34	0.05	4.32193	4.84739	0.00116621
345	103	105	I	20	75	124	89	4.16	5.08	1	lalt	TRUE	0.589361	2	0.382286	FALSE	5.74132	-5.32385	-6.68993	FALSE	FALSE	17	0.0780142	3.68012	4.83876	0.000997385
346	103	106	I	20	75	124	89	3.74	4.27	1	lalt	TRUE	0.399419	2	0.116571	FALSE	12.2634	18.3745	7.4234	FALSE	FALSE	17	0.084507	3.56478	4.82948	0.00158984
347	103	107	D	80	75	124	89	4.79	5.34	0	ralt	TRUE	0.68567	2	0.288	FALSE	-3.96794	-22.34	1.56857	FALSE	FALSE	11	0.020979	5.57491	4.83318	0.00177596
348	103	108	I	20	157	193	131	5.48	3.63	0	ralt	TRUE	0.635692	2	0.215714	FALSE	-3.47163	-1.21888	-15.7338	FALSE	FALSE	13	0.0277778	5.16993	4.83439	0.00251253
349	103	109	A	40	76	154	68	3.83	4.65	0	ralt	TRUE	0.628792	2	0.275714	FALSE	0.294198	-9.63808	-1.01664	FALSE	FALSE	0	0.00689655	7.17991	4.84667	0.00482401
350	103	110	T	40	138	154	91	4.45	3.91	1	ralt	FALSE	0.902964	2	0.795714	TRUE	-13.0316	-18.6997	30.4518	FALSE	FALSE	34	0.0547945	4.18982	4.84164	0.00424576
351	103	111	T	40	76	154	68	4.25	4.07	0	ralt	TRUE	1.04605	2	0.234	FALSE	-5.64585	-11.7366	11.3511	FALSE	FALSE	30	0.0136054	6.19967	4.84874	0.00256182
352	103	112	A	40	157	193	131	4.09	4.9	1	lalt	TRUE	0.8222	2	0.122286	FALSE	-5.29513	-17.151	1.41686	FALSE	FALSE	1	0.0675676	3.88753	4.84186	0.00243286
353	103	113	R	20	76	154	68	4.29	5.5	1	ralt	FALSE	0.748298	2	0.691429	TRUE	-1.21676	-0.61541	10.531	FALSE	FALSE	24	0.0604027	4.04924	4.83609	0.000851806
354	103	114	R	20	3	121	112	3.56	5.39	0	ralt	TRUE	0.513365	2	0.253429	FALSE	7.88362	8.324	1.70526	FALSE	FALSE	27	0.0133333	6.22882	4.84328	0.00245198
355	103	115	T	40	138	154	91	4.52	4.8	1	lalt	TRUE	1.07442	2	0.121143	FALSE	9.94214	7.39156	-13.0466	FALSE	FALSE	34	0.0596026	4.06848	4.8377	0.00243669
356	103	116	I	20	76	154	68	4.88	4.68	0	lalt	FALSE	0.972494	2	0.918286	TRUE	8.65111	13.5593	5.77821	FALSE	FALSE	12	0.0131579	6.24793	4.84491	0.00242159
357	103	117	T	40	157	193	131	4.77	3.54	0	ralt	TRUE	1.07352	2	0.220571	FALSE	-0.232481	-10.3868	-5.30403	FALSE	FALSE	31	0.0196078	5.67243	4.8489	0.00331654
358	103	118	O	80	0	168	107	4.83	5.37	1	ralt	FALSE	1.08164	2	0.784571	TRUE	-2.84479	4.71001	-3.83781	FALSE	FALSE	20	0.0714286	3.80735	4.8418	0.0016926
359	103	119	I	20	0	168	107	4.48	4.13	0	ralt	TRUE	0.932673	2	0.515143	TRUE	2.18423	7.06615	-20.3814	FALSE	FALSE	14	0.00645161	7.27612	4.85386	0.00386106
360	103	120	O	80	0	168	107	4.69	5.09	1	lalt	TRUE	0.61999	3	0.532	TRUE	-6.52902	-13.7569	21.0935	FALSE	FALSE	20	0.0769231	3.70044	4.84617	0.00380432
361	103	121	I	20	76	154	68	4.57	3.76	0	ralt	TRUE	0.630039	3	0.263714	FALSE	10.222	-7.51598	-3.43695	FALSE	FALSE	12	0.0191083	5.70966	4.85029	0.00163004
362	103	122	A	40	157	193	131	4.93	5.16	1	lalt	TRUE	0.519222	3	0.119429	FALSE	3.52393	-11.3167	0.0806383	FALSE	FALSE	1	0.0696203	3.84435	4.84359	0.00165302
363	103	123	D	80	0	168	107	3.88	5.15	0	ralt	TRUE	1.12519	3	0.942	TRUE	1.65455	5.08343	-7.14867	FALSE	FALSE	8	0.0188679	5.72792	4.84779	0.00164341
364	103	124	T	40	3	121	112	4.66	5.3	0	ralt	TRUE	0.829302	3	0	FALSE	17.1025	17.9407	-8.08514	FALSE	FALSE	33	0.025	5.32193	4.84972	0.00227533
365	103	125	O	80	0	168	107	3.83	4.79	1	lalt	TRUE	1.02523	3	0.263714	FALSE	5.23814	-7.68484	-5.66834	FALSE	FALSE	20	0.0807453	3.63048	4.84189	0.00125373
366	103	126	T	40	76	154	68	4.22	5.42	0	ralt	TRUE	0.929418	3	0	FALSE	3.102	8.74444	-13.5799	FALSE	FALSE	30	0.0185185	5.75489	4.84619	0.00155659
367	103	127	D	80	0	168	107	4.2	3.53	0	lalt	FALSE	1.29341	3	0.988857	TRUE	-0.553252	-1.64863	10.5318	FALSE	FALSE	8	0.0245399	5.34873	4.84826	0.00223575
368	103	128	T	40	138	154	91	4.46	4.78	1	ralt	FALSE	0.871613	3	0.373714	FALSE	11.5071	-9.07788	10.2393	FALSE	FALSE	34	0.0609756	4.03562	4.84294	0.00132824
369	103	129	I	20	138	154	91	4.88	4.9	0	lalt	FALSE	0.969669	3	0.238857	FALSE	-4.24925	-4.37663	2.75569	FALSE	FALSE	16	0.0121212	6.36632	4.85026	0.00219586
370	103	130	I	20	0	168	107	4.67	3.54	0	ralt	TRUE	1.06664	3	0.311429	FALSE	-0.991333	3.06941	1.43138	FALSE	FALSE	14	0.0120482	6.37504	4.85755	0.00363454
371	103	131	R	20	76	154	68	3.55	4.61	1	lalt	TRUE	0.46987	3	0.118857	FALSE	11.7137	-4.68631	7.72764	FALSE	FALSE	24	0.0598802	4.06178	4.85242	0.00217097
372	103	132	T	40	138	154	91	5.09	3.64	1	lalt	TRUE	1.01502	3	0.480857	TRUE	11.3193	7.7484	-9.86978	FALSE	FALSE	34	0.0654762	3.93289	4.84663	0.000688225
373	103	133	A	40	157	193	131	4.35	4.09	1	lalt	TRUE	0.536143	3	0.362	FALSE	2.87244	-5.94796	9.64764	FALSE	FALSE	1	0.0710059	3.81592	4.84025	0.000618101
374	103	134	R	20	75	124	89	3.92	5.39	0	ralt	TRUE	0.855287	3	0.408857	TRUE	-2.43474	3.90797	-7.86285	FALSE	FALSE	29	0.0235294	5.40939	4.84262	0.00121899
375	103	135	O	80	0	168	107	5.28	4.39	1	lalt	TRUE	0.849363	3	0.201714	FALSE	9.90666	14.5482	-11.1775	FALSE	FALSE	20	0.0818713	3.6105	4.83519	0.00116499
376	103	136	O	80	0	168	107	4	5.3	1	lalt	TRUE	0.880384	3	0.138857	FALSE	-7.38251	-2.64243	12.0889	FALSE	FALSE	20	0.0872093	3.51937	4.82734	0.00104117
377	103	137	I	20	75	124	89	5.16	4.56	1	lalt	TRUE	0.583462	3	0.260857	FALSE	3.34901	8.0589	-4.72661	FALSE	FALSE	17	0.0751445	3.73419	4.82077	0.000485416
378	103	138	A	40	138	154	91	4.28	5.1	0	ralt	TRUE	0.925504	3	0.096	FALSE	6.78142	0.704445	5.67363	FALSE	FALSE	4	0.0114943	6.44294	4.82828	0.00199826
379	103	139	D	80	3	121	112	4.9	4.2	1	lalt	TRUE	1.17958	3	0.472	TRUE	4.43092	-4.86191	7.117	FALSE	FALSE	9	0.0628571	3.99178	4.82319	0.00204175
380	103	140	I	20	75	124	89	4	4.81	1	lalt	TRUE	1.17857	3	0.347714	FALSE	-6.37108	1.82247	-6.84113	FALSE	FALSE	17	0.0795455	3.65208	4.81631	0.000551357
381	103	141	A	40	75	124	89	5.4	4.03	0	ralt	TRUE	0.657656	3	0.407429	TRUE	1.59803	-12.037	3.66826	FALSE	FALSE	5	0.0169492	5.88264	4.8211	0.00141271
382	103	142	R	20	138	154	91	3.92	4.12	0	ralt	TRUE	0.584793	3	0.249143	FALSE	1.33276	0.426266	6.53834	FALSE	FALSE	28	0.011236	6.47573	4.82862	0.00286819
383	103	143	O	80	157	193	131	4.97	4.56	0	ralt	TRUE	1.47491	3	0.435714	TRUE	8.44025	-1.30722	7.10342	FALSE	FALSE	19	0.0111732	6.48382	4.83611	0.00337908
384	103	144	A	40	157	193	131	5.25	4.96	1	lalt	TRUE	0.655965	3	0.486	TRUE	11.9692	15.3645	-19.5281	FALSE	FALSE	1	0.0722222	3.79141	4.83006	0.00193509
385	103	145	I	20	75	124	89	4.27	5.1	1	lalt	TRUE	0.784971	3	0.13	FALSE	-7.09049	-5.63295	0.712042	FALSE	FALSE	17	0.0828729	3.59296	4.82302	0.000468145
386	103	146	R	20	76	154	68	5.03	4.79	1	lalt	TRUE	0.617029	3	0.462	TRUE	5.8161	-14.2896	10.6835	FALSE	FALSE	24	0.0604396	4.04836	4.81846	0.000518295
387	103	147	T	40	157	193	131	3.99	3.74	0	ralt	TRUE	1.01907	3	0.293429	FALSE	6.97559	18.3947	1.13118	FALSE	FALSE	31	0.0218579	5.5157	4.82137	0.00116753
388	103	148	T	40	138	154	91	5.18	3.66	1	lalt	TRUE	1.11922	3	0.536286	TRUE	-10.2731	-15.7534	-0.958713	FALSE	FALSE	34	0.0652174	3.9386	4.8163	0.00113375
389	103	149	A	40	138	154	91	5.46	3.93	0	ralt	TRUE	0.786347	3	0	FALSE	21.4285	35.5656	-14.0601	FALSE	FALSE	4	0.0162162	5.94642	4.82123	0.00139967
390	103	150	I	20	75	124	89	5.01	3.54	1	lalt	TRUE	1.06638	3	0.153429	FALSE	2.83803	-8.58623	-12.5216	FALSE	FALSE	17	0.0860215	3.53916	4.81416	0.00131598
391	103	151	T	40	138	154	91	5.01	5.34	1	lalt	TRUE	0.879487	3	0.213143	FALSE	2.5268	12.1067	-3.1947	FALSE	FALSE	34	0.0695187	3.84645	4.80874	0.000440604
392	103	152	I	20	76	154	68	4.53	4.16	0	lalt	FALSE	1.59644	3	0.495429	TRUE	0.00637577	9.40056	-3.74884	FALSE	FALSE	12	0.0212766	5.55459	4.81183	0.0010883
393	103	153	A	40	138	154	91	5.45	5.26	0	lalt	FALSE	1.30351	3	0.132	FALSE	8.63568	3.78607	2.54904	FALSE	FALSE	4	0.021164	5.56224	4.81492	0.00167683
394	103	154	D	80	3	121	112	4.34	3.74	1	lalt	TRUE	1.02546	3	0.688571	TRUE	-1.93424	-10.255	7.70197	FALSE	FALSE	9	0.0631579	3.98489	4.81028	0.00110074
395	103	155	D	80	157	193	131	4.15	5.35	0	ralt	TRUE	0.563633	3	0.366286	FALSE	-4.58483	-19.2466	-17.0069	FALSE	FALSE	7	0.0104712	6.57743	4.81788	0.00185192
396	103	156	T	40	75	124	89	5.05	4.67	0	lalt	FALSE	1.17265	3	0.134857	FALSE	5.07713	-2.94995	13.586	FALSE	FALSE	35	0.0104167	6.58496	4.82544	0.00315715
397	103	157	R	20	3	121	112	3.84	4.71	0	missing	FALSE		3	0.396286	FALSE	-8.53158	-1.02338	23.6257	TRUE	TRUE	27	0.015544	6.00749	4.83043	0.00265294
398	103	158	I	20	75	124	89	5.17	4.8	1	lalt	TRUE	0.912691	3	0.484286	TRUE	0.609915	-1.72812	-1.91554	FALSE	FALSE	17	0.0876289	3.51245	4.82348	0.0012522
399	103	159	R	20	76	154	68	5.07	4.36	1	lalt	TRUE	0.543741	3	0.486286	TRUE	-6.44842	-4.43707	-17.9471	FALSE	FALSE	24	0.0615385	4.02237	4.81911	0.000435257
400	103	160	R	20	138	154	91	4.04	4.13	0	ralt	TRUE	0.474834	3	0.437714	TRUE	-1.02097	6.60071	7.44523	FALSE	FALSE	28	0.0153061	6.02975	4.82417	0.00132598
401	103	161	O	80	0	168	107	4.04	3.9	1	lalt	TRUE	0.528999	3	0.579714	TRUE	-3.96027	-1.11836	-8.82331	FALSE	FALSE	20	0.0812183	3.62205	4.81789	0.00124726
402	103	162	A	40	76	154	68	3.9	4.69	0	ralt	TRUE	0.412205	3	0.364	FALSE	2.07199	-11.1426	-8.92663	FALSE	FALSE	0	0.010101	6.62936	4.82545	0.00171743
403	103	163	R	20	76	154	68	3.74	3.69	1	lalt	TRUE	0.498362	3	0.230857	FALSE	7.48077	7.99391	22.9206	FALSE	FALSE	24	0.0653266	3.93618	4.82075	0.00175893
404	103	164	O	80	138	154	91	3.63	3.84	0	ralt	TRUE	0.597582	3	0.136571	FALSE	8.37961	-4.58769	-2.18202	FALSE	FALSE	22	0.015	6.05889	4.82584	0.00127921
405	103	165	T	40	138	154	91	4.25	3.52	1	lalt	TRUE	0.724793	3	0.136286	FALSE	7.79613	20.7169	-22.9209	FALSE	FALSE	34	0.0696517	3.8437	4.82075	0.00125453
406	103	166	I	20	0	168	107	3.69	4.02	0	ralt	TRUE	1.05496	3	0.514571	TRUE	11.8748	11.676	2.64727	FALSE	FALSE	14	0.0148515	6.07325	4.82587	0.00124871
407	103	167	I	20	75	124	89	4.19	4.75	1	lalt	TRUE	0.948146	3	0.136857	FALSE	3.18897	8.34955	-6.8362	FALSE	FALSE	17	0.08867	3.49541	4.81917	0.00118907
408	103	168	A	40	157	193	131	3.85	4.86	1	lalt	TRUE	0.802248	3	0.422	TRUE	-12.7924	-20.1891	2.93934	FALSE	FALSE	1	0.0686275	3.86507	4.81429	0.000368417
409	103	169	T	40	75	124	89	4.38	3.88	0	ralt	TRUE	1.04434	3	0.78	TRUE	7.10225	9.14536	13.8592	FALSE	FALSE	35	0.0146341	6.09452	4.81946	0.00123154
410	103	170	O	80	157	193	131	5.5	3.54	0	ralt	TRUE	0.663489	3	0.279143	FALSE	-5.57736	-10.1406	-5.10517	FALSE	FALSE	19	0.0145631	6.10154	4.82462	0.00203324
411	103	171	T	40	138	154	91	4.63	5.44	1	ralt	FALSE	0.873647	3	0.7	TRUE	6.90504	12.5724	2.51746	FALSE	FALSE	34	0.0724638	3.7866	4.81942	0.00120456
412	103	172	R	20	157	193	131	3.94	4.96	0	ralt	TRUE	0.477646	3	0.130286	FALSE	3.4375	-2.68997	5.3403	FALSE	FALSE	25	0.00961538	6.70044	4.82695	0.00165241
413	103	173	R	20	3	121	112	5.09	3.56	0	ralt	TRUE	0.669739	3	0.0442857	FALSE	11.078	13.3505	-13.2898	FALSE	FALSE	27	0.0191388	5.70736	4.83036	0.00221576
414	103	174	T	40	138	154	91	3.67	5.27	1	lalt	TRUE	0.863887	3	0.255429	FALSE	1.3672	-3.06478	8.29358	FALSE	FALSE	34	0.0761905	3.71425	4.82488	0.00093534
415	103	175	R	20	76	154	68	4	3.71	1	lalt	TRUE	0.541974	3	0.275714	FALSE	9.04728	-6.72281	1.77998	FALSE	FALSE	24	0.0663507	3.91374	4.82036	0.000381211
416	103	176	O	80	3	121	112	4.87	4.83	0	ralt	TRUE	1.78411	3	0.549429	TRUE	-0.128714	-0.412651	13.7215	FALSE	FALSE	21	0.0141509	6.14296	4.82556	0.00119325
417	103	177	O	80	75	124	89	3.91	5.15	0	ralt	TRUE	0.546224	3	0.241714	FALSE	7.629	18.4576	2.32058	FALSE	FALSE	23	0.00938967	6.73471	4.83304	0.00241159
418	103	178	T	40	138	154	91	4.67	3.92	1	lalt	TRUE	0.928237	3	0.136857	FALSE	10.0208	5.8743	-13.6949	FALSE	FALSE	34	0.0794393	3.654	4.82738	0.00158285
419	103	179	R	20	76	154	68	3.82	3.62	1	lalt	TRUE	0.494387	3	0.285143	FALSE	-3.54773	-18.5424	-24.9047	FALSE	FALSE	24	0.0697674	3.8413	4.82261	0.000348324
420	103	180	R	20	0	168	107	5.47	4.19	0	ralt	TRUE	0.421273	4	0.114571	FALSE	12.2767	9.85639	0.207638	FALSE	FALSE	26	0.00925926	6.75489	4.83009	0.00159387
421	103	181	D	80	75	124	89	3.54	4.98	0	lalt	FALSE	1.39028	4	0.639143	TRUE	-0.870678	17.3718	-4.98871	FALSE	FALSE	11	0.0184332	5.76155	4.83361	0.00213679
422	103	182	D	80	3	121	112	3.59	4.36	1	lalt	TRUE	2.22431	4	0.188571	FALSE	7.35418	0.336444	5.75057	FALSE	FALSE	9	0.059633	4.06774	4.82989	0.000948891
423	103	183	D	80	3	121	112	4.5	5.39	1	lalt	TRUE	0.991445	4	0.63	TRUE	5.03926	-0.284197	-0.838033	FALSE	FALSE	9	0.0639269	3.96743	4.82575	0.000900807
424	103	184	O	80	3	121	112	5.08	3.84	0	ralt	TRUE	0.866485	4	0.128857	FALSE	3.03997	-0.286584	-11.3892	FALSE	FALSE	21	0.0181818	5.78136	4.82933	0.000923756
425	103	185	A	40	76	154	68	5.33	5.08	0	ralt	TRUE	0.381604	4	0	FALSE	7.47966	16.6001	-8.82152	FALSE	FALSE	0	0.0135747	6.20294	4.83456	0.00167263
426	103	186	O	80	75	124	89	4.84	5.07	0	ralt	TRUE	0.807594	4	0.404286	TRUE	5.60969	1.2437	8.17532	FALSE	FALSE	23	0.0135135	6.20945	4.83976	0.0018919
427	103	187	O	80	157	193	131	3.79	3.63	0	ralt	TRUE	0.657636	4	0.130286	FALSE	4.89059	3.13254	-10.7232	FALSE	FALSE	19	0.0179372	5.8009	4.84332	0.00165822
428	103	188	T	40	138	154	91	3.56	4.24	1	lalt	TRUE	0.644828	4	0.374286	FALSE	3.3437	6.53351	14.5452	FALSE	FALSE	34	0.0803571	3.63743	4.8378	0.000859545
429	103	189	R	20	76	154	68	3.8	4.49	1	lalt	TRUE	0.581049	4	0	FALSE	0.246829	-8.55543	14.1707	FALSE	FALSE	24	0.0711111	3.81378	4.83309	0.000312756
430	103	190	I	20	0	168	107	4.71	4.72	0	ralt	TRUE	0.582255	4	0.212286	FALSE	3.77577	-4.22867	-10.3615	FALSE	FALSE	14	0.0176991	5.82018	4.83672	0.000873712
431	103	191	R	20	157	193	131	4.4	4.02	0	ralt	TRUE	0.784284	4	0.0437143	FALSE	6.56904	6.64708	-0.396746	FALSE	FALSE	25	0.0132159	6.24159	4.84194	0.00163013
432	103	192	I	20	138	154	91	5.11	4.27	0	lalt	FALSE	1.29844	4	0.188286	FALSE	-1.1491	10.4767	-4.27635	FALSE	FALSE	16	0.0131579	6.24793	4.84714	0.00184383
433	103	193	T	40	138	154	91	4.96	3.86	1	ralt	FALSE	2.44231	4	0.356	FALSE	6.17548	26.344	3.24214	FALSE	FALSE	34	0.0829694	3.59128	4.84153	0.00105284
434	103	194	T	40	0	168	107	3.56	4.99	0	ralt	TRUE	1.85336	4	0.553714	TRUE	-2.44855	1.26991	7.17948	FALSE	FALSE	32	0.0130435	6.26053	4.84675	0.00104852
435	103	195	O	80	0	168	107	3.78	3.51	1	lalt	TRUE	0.895389	4	0	FALSE	11.2398	0.474457	-5.00736	FALSE	FALSE	20	0.0735931	3.76429	4.84192	0.0010628
436	103	196	D	80	138	154	91	3.73	4.72	0	ralt	TRUE	1.63961	4	0.105714	FALSE	5.37354	5.69149	-10.0492	FALSE	FALSE	10	0.0172414	5.85798	4.84557	0.000841692
437	103	197	A	40	0	168	107	4.92	3.58	0	ralt	TRUE	1.23872	4	0	FALSE	0.532222	-1.4688	-1.6039	FALSE	FALSE	2	0.0171674	5.86419	4.84923	0.00137389
438	103	198	A	40	3	121	112	3.86	4.03	0	ralt	TRUE	0.651871	4	0.121714	FALSE	0.384814	-6.7172	-1.73823	FALSE	FALSE	3	0.017094	5.87036	4.85288	0.00136827
439	103	199	R	20	0	168	107	5.46	3.96	0	ralt	TRUE	1.76899	4	0.0408571	FALSE	4.00507	-5.23224	4.31241	FALSE	FALSE	26	0.012766	6.29155	4.85806	0.00157671
440	103	200	A	40	75	124	89	5.49	4.99	0	ralt	TRUE	0.771038	4	0.134	FALSE	7.74639	10.887	-1.83922	FALSE	FALSE	5	0.0169492	5.88264	4.86169	0.00157028
441	103	201	I	20	3	121	112	4.04	4.91	0	ralt	TRUE	0.547009	4	0.131143	FALSE	5.84835	6.70646	-3.294	FALSE	FALSE	15	0.0168776	5.88874	4.86532	0.00135168
442	103	202	T	40	76	154	68	4.43	3.59	0	ralt	TRUE	1.08104	4	0.255143	FALSE	-0.926912	-0.446936	9.10353	FALSE	FALSE	30	0.0168067	5.89482	4.86894	0.00134624
443	103	203	R	20	157	193	131	5.49	3.52	0	ralt	TRUE	0.543302	4	0.172	FALSE	-10.5927	-10.8824	0.461978	FALSE	FALSE	25	0.0167364	5.90087	4.87256	0.00134084
444	103	204	R	20	76	154	68	4.55	5.47	1	lalt	TRUE	0.636398	4	0.250571	FALSE	1.77161	-8.94209	3.32056	FALSE	FALSE	24	0.0708333	3.81943	4.86803	0.000815477
445	103	205	O	80	75	124	89	5.46	4.07	0	ralt	TRUE	0.548438	4	0.295143	FALSE	6.41294	5.91602	-22.6082	FALSE	FALSE	23	0.0165975	5.91289	4.87167	0.000812314
446	103	206	I	20	75	124	89	4.59	5.46	1	lalt	TRUE	0.819433	4	0.354286	FALSE	-0.100927	1.63035	17.6886	FALSE	FALSE	17	0.0785124	3.67094	4.86659	0.00079145
447	103	207	D	80	3	121	112	5.22	4.02	1	lalt	TRUE	0.999473	4	0.118857	FALSE	2.19501	-10.5884	6.18648	FALSE	FALSE	9	0.0617284	4.01792	4.86293	0.000297056
448	103	208	D	80	3	121	112	4.39	4.83	1	lalt	TRUE	0.45656	4	0.493714	TRUE	-8.5412	-15.4455	11.0012	FALSE	FALSE	9	0.0655738	3.93074	4.85895	0.000704067
449	103	209	R	20	76	154	68	4.33	4.24	1	lalt	TRUE	0.535654	4	0	FALSE	10.2646	11.0087	0.302503	FALSE	FALSE	24	0.0734694	3.76671	4.85437	0.000291597
450	103	210	D	80	76	154	68	3.84	3.71	0	ralt	TRUE	1.32274	4	0.324571	FALSE	-1.52763	-27.6335	1.38172	FALSE	FALSE	6	0.0162602	5.94251	4.85811	0.000787664
451	103	211	A	40	76	154	68	4.91	3.51	0	ralt	TRUE	0.369991	4	0.253714	FALSE	4.88067	8.42342	4.32252	FALSE	FALSE	0	0.0161943	5.94837	4.86184	0.00129917
452	103	212	D	80	3	121	112	3.83	3.79	1	lalt	TRUE	0.449166	4	0.123143	FALSE	7.39697	7.01814	2.03164	FALSE	FALSE	9	0.0685484	3.86673	4.85769	0.000790839
453	103	213	D	80	3	121	112	4.07	4.09	1	lalt	TRUE	0.774371	4	0.184571	FALSE	5.55333	12.2071	-14.8593	FALSE	FALSE	9	0.0722892	3.79008	4.85327	0.000607341
454	103	214	A	40	157	193	131	3.5	3.55	1	lalt	TRUE	0.839527	4	0.299429	FALSE	0.93994	0.87388	-0.874502	FALSE	FALSE	1	0.06	4.05889	4.84993	0.000298212
455	103	215	A	40	157	193	131	4.22	4.74	1	lalt	TRUE	0.350712	4	0.0997143	FALSE	-2.99549	-12.1286	-4.98036	FALSE	FALSE	1	0.063745	3.97154	4.84628	0.000685822
456	103	216	D	80	3	121	112	5.13	4.08	1	lalt	TRUE	0.460894	4	0.511429	TRUE	-14.9115	-20.9464	6.58079	FALSE	FALSE	9	0.0753968	3.72935	4.84173	0.000276777
457	103	217	O	80	138	154	91	3.81	4.84	0	ralt	TRUE	0.795988	4	0.117429	FALSE	5.3871	9.42137	8.66122	FALSE	FALSE	22	0.0158103	5.98299	4.84558	0.000759221
458	103	218	R	20	76	154	68	4.33	4.82	1	lalt	TRUE	0.728111	4	0.118286	FALSE	-6.09156	-8.37227	15.8976	FALSE	FALSE	24	0.0748031	3.74076	4.84111	0.000756421
459	103	219	A	40	157	193	131	4.41	4.53	1	lalt	TRUE	0.667196	4	0.127714	FALSE	11.769	2.60586	-14.2213	FALSE	FALSE	1	0.0666667	3.90689	4.83731	0.000264103
460	103	220	O	80	76	154	68	4.76	3.52	0	ralt	TRUE	0.625218	4	0.546	TRUE	9.01906	12.0832	4.12979	FALSE	FALSE	18	0.0078125	7	4.84452	0.0013328
461	103	221	O	80	0	168	107	4.61	4.5	1	lalt	TRUE	0.523411	4	0.251429	FALSE	-2.03468	-13.695	-5.16616	FALSE	FALSE	20	0.0700389	3.8357	4.84047	0.00131901
462	103	222	D	80	157	193	131	4.37	5.29	0	ralt	TRUE	0.577581	4	0.136857	FALSE	11.1814	-2.93685	6.34202	FALSE	FALSE	7	0.0116279	6.42626	4.84577	0.000948299
463	103	223	O	80	0	168	107	5.31	3.65	1	lalt	TRUE	0.530634	4	0.358286	FALSE	-7.98186	-6.91785	9.41937	FALSE	FALSE	20	0.0733591	3.76888	4.84149	0.000936987
464	103	224	R	20	0	168	107	4.65	4.43	0	ralt	TRUE	1.07364	4	0.278857	FALSE	-4.25351	-20.3769	11.382	FALSE	FALSE	26	0.0153846	6.02237	4.84539	0.000740039
465	103	225	T	40	75	124	89	3.63	4.01	0	ralt	TRUE	0.514876	4	0.578571	TRUE	13.0941	17.5884	-18.5608	FALSE	FALSE	35	0.0153257	6.02791	4.84927	0.00123214
466	103	226	O	80	76	154	68	4.63	4.1	0	ralt	TRUE	0.760037	4	0	FALSE	5.3234	19.4465	-13.3755	FALSE	FALSE	18	0.0114504	6.44846	4.85454	0.00141967
467	103	227	I	20	138	154	91	5.11	5.43	0	lalt	FALSE	1.67508	4	0.112	FALSE	10.2153	17.7158	-15.2171	FALSE	FALSE	16	0.0152091	6.03892	4.8584	0.00141445
468	103	228	R	20	76	154	68	3.54	5.31	1	lalt	TRUE	1.72097	4	0.604286	TRUE	5.24075	-2.15489	6.57926	FALSE	FALSE	24	0.0757576	3.72247	4.85399	0.000722577
469	103	229	A	40	157	193	131	5.48	3.58	1	lalt	TRUE	0.592102	4	0.417429	TRUE	-4.74952	-25.445	-11.0281	FALSE	FALSE	1	0.0679245	3.87992	4.85019	0.000240344
470	103	230	R	20	138	154	91	3.85	3.83	0	ralt	TRUE	0.384278	4	0.314571	FALSE	6.85992	10.8708	6.64264	FALSE	FALSE	28	0.0150376	6.05528	4.85409	0.000731974
471	103	231	D	80	157	193	131	4.64	4.85	0	ralt	TRUE	0.641403	4	0.123714	FALSE	2.66025	1.64767	15.0857	FALSE	FALSE	7	0.0149813	6.0607	4.85798	0.00120549
472	103	232	O	80	76	154	68	3.94	5.43	0	ralt	TRUE	0.686481	4	0.126857	FALSE	12.2806	-6.70491	-1.6327	FALSE	FALSE	18	0.0149254	6.06609	4.86186	0.00120116
473	103	233	T	40	138	154	91	3.67	4.14	1	lalt	TRUE	1.18552	4	0.116	FALSE	9.96981	12.5047	4.81227	FALSE	FALSE	34	0.0743494	3.74953	4.85762	0.00070995
474	103	234	D	80	3	121	112	4.43	3.56	1	lalt	TRUE	1.12862	4	0.266571	FALSE	-9.3756	-15.9195	-5.89319	FALSE	FALSE	9	0.0740741	3.75489	4.85343	0.000222368
475	103	235	T	40	0	168	107	4.24	3.99	0	ralt	TRUE	1.18178	4	0.133714	FALSE	6.70682	-2.29026	-4.95169	FALSE	FALSE	32	0.0147601	6.08215	4.85734	0.000705022
476	103	236	A	40	157	193	131	3.93	5.03	1	lalt	TRUE	0.435996	4	0.386857	FALSE	2.27362	-8.50116	11.2947	FALSE	FALSE	1	0.0698529	3.83954	4.85349	0.000709307
477	103	237	O	80	0	168	107	4.57	4.44	1	ralt	FALSE	1.56302	4	0.782571	TRUE	0.179405	-2.01305	8.33797	FALSE	FALSE	20	0.0732601	3.77083	4.84942	0.000227063
478	103	238	I	20	75	124	89	5.14	5.12	1	lalt	TRUE	0.542138	4	0.118	FALSE	-3.09583	-3.54176	5.15088	FALSE	FALSE	17	0.0729927	3.7761	4.84539	0.000219703
479	103	239	A	40	157	193	131	4.8	4.94	1	lalt	TRUE	0.676163	4	0.36	FALSE	0.864008	-10.4429	2.12804	FALSE	FALSE	1	0.0727273	3.78136	4.84142	0.000219046
480	104	0	D	20	75	124	89	5.49	5.14	1	lalt	FALSE	0.449272	1	0.103143	FALSE	13.8132	-7.40546	0.763168	FALSE	FALSE	11	0.0277778	5.16993	5.1554	0.0145257
481	104	1	T	40	76	154	68	5.32	4.86	0	lalt	TRUE	0.736248	1	0	FALSE	16.8023	9.47072	-6.21455	FALSE	FALSE	30	0.027027	5.20945	5.14266	0.0272606
482	104	2	T	40	0	168	107	4.51	5.39	1	lalt	FALSE	1.10222	1	0	FALSE	19.4801	22.4747	-18.0725	FALSE	FALSE	32	0.0263158	5.24793	5.13156	0.0266152
483	104	3	A	20	75	124	89	5.31	3.88	0	ralt	FALSE	0.428236	1	0.155429	FALSE	20.1466	-29.666	18.4565	FALSE	FALSE	5	0.025641	5.2854	5.12193	0.0259994
484	104	4	T	40	75	124	89	3.6	4.7	0	ralt	FALSE	1.23428	1	0	FALSE	17.2112	33.0048	-20.2648	FALSE	FALSE	35	0.025	5.32193	5.11365	0.0254112
485	104	5	D	20	3	121	112	4.85	3.74	0	lalt	TRUE	1.70036	1	0	FALSE	26.7418	43.9073	-20.8016	FALSE	FALSE	9	0.0243902	5.35755	5.1066	0.0248488
486	104	6	D	20	76	154	68	5.42	4.1	0	ralt	FALSE	1.90339	1	0.106857	FALSE	6.71656	2.39338	2.45388	FALSE	FALSE	6	0.0238095	5.39232	5.10068	0.0243105
487	104	7	D	20	76	154	68	3.96	5.41	0	ralt	FALSE	1.33737	1	0	FALSE	9.39644	33.288	-13.9963	FALSE	FALSE	6	0.0465116	4.42626	5.07864	0.0409514
488	104	8	A	20	0	168	107	4.76	3.64	0	lalt	TRUE	1.81529	1	0	FALSE	6.49522	9.17991	-1.66005	FALSE	FALSE	2	0.0227273	5.45943	5.07508	0.0178536
489	104	9	R	80	3	121	112	3.52	4.88	1	lalt	FALSE	1.24143	1	0.102571	FALSE	9.26621	4.08656	-3.87996	FALSE	FALSE	27	0.0222222	5.49185	5.07237	0.0228262
490	104	10	T	40	157	193	131	4.35	4.75	0	ralt	FALSE	1.78748	1	0	FALSE	20.3957	13.764	-22.6366	FALSE	FALSE	31	0.0217391	5.52356	5.07044	0.0223706
491	104	11	R	80	3	121	112	4.65	4.49	1	ralt	TRUE	1.29752	1	0	FALSE	7.53057	-6.83727	15.454	FALSE	FALSE	27	0.0425532	4.55459	5.05351	0.0168263
492	104	12	D	20	75	124	89	4.05	4.54	1	lalt	FALSE	0.796576	1	0	FALSE	11.0615	10.5327	-9.17649	FALSE	FALSE	11	0.0416667	4.58496	5.03788	0.0115071
493	104	13	T	40	138	154	91	4.03	4.61	0	lalt	TRUE	1.44866	1	0	FALSE	24.4453	22.054	-11.5932	FALSE	FALSE	34	0.0204082	5.61471	5.03856	0.0162041
494	104	14	A	20	76	154	68	3.75	5.21	1	ralt	TRUE	1.6197	1	0	FALSE	8.20127	0.817133	1.48814	FALSE	FALSE	0	0.02	5.64386	5.03978	0.0207159
495	104	15	T	40	76	154	68	4.56	4.93	0	ralt	FALSE	1.16975	1	0	FALSE	4.90711	0.523434	5.53798	FALSE	FALSE	30	0.0392157	4.67243	5.02699	0.0156258
496	104	16	R	80	157	193	131	3.94	4.37	0	ralt	FALSE	1.70273	1	0.124	FALSE	7.41672	2.47825	-0.921147	FALSE	FALSE	25	0.0192308	5.70044	5.02944	0.0153518
497	104	17	D	20	75	124	89	4.42	3.87	1	lalt	FALSE	2.0567	1	0	FALSE	11.4602	6.41248	-16.6269	FALSE	FALSE	11	0.0566038	4.14296	5.00925	0.0133328
498	104	18	R	80	0	168	107	4.87	4.03	0	ralt	FALSE	1.82879	1	0.110286	FALSE	13.7642	24.2525	6.10611	FALSE	FALSE	26	0.0185185	5.75489	5.01291	0.0131089
499	104	19	D	20	138	154	91	5.5	3.52	0	lalt	TRUE	1.63084	1	0	FALSE	-12.0143	-5.32986	1.98292	FALSE	FALSE	10	0.0181818	5.78136	5.01691	0.0189612
500	104	20	T	40	75	124	89	4.89	4.38	0	ralt	FALSE	1.52688	1	0.0911429	FALSE	-3.98003	-6.67727	12.0623	FALSE	FALSE	35	0.0357143	4.80735	5.00799	0.0143449
501	104	21	R	80	76	154	68	4.24	4.88	0	ralt	FALSE	1.2259	1	0	FALSE	3.29309	-4.39908	-3.99987	FALSE	FALSE	24	0.0175439	5.83289	5.01282	0.0141134
502	104	22	O	40	138	154	91	3.59	4.66	0	lalt	TRUE	1.25887	1	0.100286	FALSE	3.59399	6.66072	-2.36292	FALSE	FALSE	22	0.0172414	5.85798	5.0179	0.0180436
503	104	23	I	80	138	154	91	4.57	4	1	ralt	TRUE	1.63996	1	0	FALSE	7.17277	-0.0707459	-0.386828	FALSE	FALSE	16	0.0169492	5.88264	5.02323	0.0177571
504	104	24	A	20	76	154	68	5.21	3.66	1	ralt	TRUE	1.76307	1	0.129143	FALSE	11.5522	3.03228	-6.49967	FALSE	FALSE	0	0.0333333	4.90689	5.0164	0.0134612
505	104	25	A	20	76	154	68	5.45	4.23	1	ralt	TRUE	1.6801	1	0	FALSE	9.75412	8.57633	-5.69717	FALSE	FALSE	0	0.0491803	4.34577	5.00227	0.0172104
506	104	26	T	40	157	193	131	5.08	4.23	0	lalt	TRUE	1.59207	1	0	FALSE	8.43697	2.16063	-0.16997	FALSE	FALSE	31	0.0322581	4.9542	4.99673	0.00766436
507	104	27	I	80	138	154	91	3.73	4.24	1	ralt	TRUE	1.40506	1	0.106286	FALSE	-4.59588	-0.735826	4.82018	FALSE	FALSE	16	0.031746	4.97728	4.99173	0.00903654
508	104	28	A	20	0	168	107	4.71	4.11	0	missing	FALSE		1	0.175714	FALSE	4.63383	-10.3441	2.26986	TRUE	TRUE	2	0.03125	5	4.98723	0.00890865
509	104	29	T	40	157	193	131	4.89	4.84	0	lalt	TRUE	2.33007	1	0.100571	FALSE	-0.604669	-5.41416	9.50421	FALSE	FALSE	31	0.0461538	4.43741	4.97577	0.00734887
510	104	30	O	40	75	124	89	5.14	4.2	0	ralt	FALSE	1.62902	1	0	FALSE	-2.90237	4.95312	-3.95135	FALSE	FALSE	23	0.0151515	6.04439	4.98356	0.0109077
511	104	31	I	80	3	121	112	5.49	3.85	0	ralt	FALSE	1.97198	1	0	FALSE	-11.85	-10.2596	10.9611	FALSE	FALSE	15	0.0149254	6.06609	4.99144	0.0157548
512	104	32	A	20	76	154	68	4.76	3.73	1	ralt	TRUE	1.30303	1	0	FALSE	4.00488	1.08426	-4.21804	FALSE	FALSE	0	0.0588235	4.08746	4.97608	0.00987836
513	104	33	O	40	157	193	131	3.75	3.76	1	ralt	TRUE	1.26206	1	0	FALSE	8.19237	3.83225	-6.36719	FALSE	FALSE	19	0.0144928	6.10852	4.98444	0.00974612
514	104	34	A	20	3	121	112	4.61	4.5	0	lalt	TRUE	1.28624	1	0.111429	FALSE	2.78294	-6.78831	11.4969	FALSE	FALSE	3	0.0142857	6.12928	4.99286	0.0151154
515	104	35	R	80	3	121	112	4.04	4.82	1	lalt	FALSE	1.86624	1	0.108	FALSE	-5.60498	-6.1289	2.50192	FALSE	FALSE	27	0.0422535	4.56478	4.98404	0.0101934
516	104	36	A	20	76	154	68	5.35	4.91	1	lalt	FALSE	2.4802	1	0	FALSE	2.6652	11.9445	2.029	FALSE	FALSE	0	0.0694444	3.848	4.96675	0.00428361
517	104	37	O	40	157	193	131	4.87	5.3	1	ralt	TRUE	1.99601	1	0.126571	FALSE	5.59888	-1.82003	3.94093	FALSE	FALSE	19	0.0273973	5.18982	4.96568	0.00551345
518	104	38	A	20	76	154	68	3.64	3.95	1	ralt	TRUE	1.27605	1	0	FALSE	0.376552	1.60435	-7.27487	FALSE	FALSE	0	0.0810811	3.62449	4.94641	0.00516099
519	104	39	D	20	0	168	107	4.59	4.87	0	lalt	TRUE	1.13918	1	0	FALSE	4.81416	16.1755	-20.1575	FALSE	FALSE	8	0.0133333	6.22882	4.95607	0.00832515
520	104	40	O	40	138	154	91	5.49	3.67	0	lalt	TRUE	2.18714	1	0.138286	FALSE	-6.31436	-7.41279	3.65172	FALSE	FALSE	22	0.0263158	5.24793	4.95593	0.0107969
521	104	41	I	80	138	154	91	4.91	5.22	1	missing	FALSE		1	0	FALSE	5.11739	9.80712	8.64645	TRUE	TRUE	16	0.038961	4.68182	4.94975	0.00630783
522	104	42	A	20	76	154	68	5.43	3.9	1	ralt	TRUE	1.08706	1	0	FALSE	14.6196	22.1809	-6.58992	FALSE	FALSE	0	0.0897436	3.47805	4.92999	0.00352871
523	104	43	T	40	0	168	107	3.75	4.58	1	lalt	FALSE	1.45305	1	0.114857	FALSE	15.6614	17.3041	-10.9087	FALSE	FALSE	32	0.0253165	5.30378	4.93088	0.00467473
524	104	44	I	80	76	154	68	4.68	3.51	0	lalt	TRUE	2.2311	1	0.104571	FALSE	8.34377	-1.18755	0.619127	FALSE	FALSE	12	0.0125	6.32193	4.94128	0.0102874
525	104	45	T	40	0	168	107	5.2	4.44	1	lalt	FALSE	1.14419	1	0	FALSE	7.07954	-10.2883	-8.42668	FALSE	FALSE	32	0.037037	4.75489	4.93646	0.00901207
526	104	46	I	80	138	154	91	5.25	4.93	1	ralt	TRUE	1.06721	1	0	FALSE	8.7101	-12.1496	-2.56787	FALSE	FALSE	16	0.0487805	4.35755	4.92758	0.00420564
527	104	47	A	20	157	193	131	4.05	5.17	0	lalt	TRUE	1.54009	1	0.130571	FALSE	-1.23693	8.87338	9.95754	FALSE	FALSE	1	0.0120482	6.37504	4.93828	0.00820649
528	104	48	R	80	3	121	112	3.74	3.79	1	ralt	TRUE	1.15318	1	0.153429	FALSE	2.6394	-2.69308	6.35716	FALSE	FALSE	27	0.047619	4.39232	4.93	0.00811485
529	104	49	A	20	75	124	89	3.62	5	0	lalt	TRUE	1.08435	1	0	FALSE	13.8935	19.1787	-11.9916	FALSE	FALSE	5	0.0235294	5.40939	4.93204	0.00517509
530	104	50	R	80	0	168	107	4.86	3.66	0	lalt	TRUE	1.86238	1	0	FALSE	5.20194	-6.75221	-1.66999	FALSE	FALSE	26	0.0232558	5.42626	4.93423	0.00678968
531	104	51	D	20	75	124	89	5.06	4.95	1	lalt	FALSE	1.52143	1	0.0354286	FALSE	19.3111	3.82292	-9.45255	FALSE	FALSE	11	0.045977	4.44294	4.92684	0.00506641
532	104	52	D	20	75	124	89	3.5	5.16	1	ralt	TRUE	0.847438	1	0.132857	FALSE	-6.24211	-9.36222	7.04974	FALSE	FALSE	11	0.0568182	4.1375	4.91654	0.00664574
533	104	53	I	80	76	154	68	5.24	5.05	0	lalt	TRUE	1.10653	1	0	FALSE	2.75088	9.10324	-0.955295	FALSE	FALSE	12	0.0224719	5.47573	4.91937	0.0046129
534	104	54	R	80	76	154	68	3.53	5.25	0	missing	FALSE		1	0.118286	FALSE	-0.329962	-1.52361	22.2798	TRUE	TRUE	24	0.0222222	5.49185	4.92232	0.00650775
535	104	55	O	40	3	121	112	3.99	3.89	0	lalt	TRUE	1.09537	1	0	FALSE	12.6772	-6.5328	10.7499	FALSE	FALSE	21	0.010989	6.50779	4.93358	0.00910513
536	104	56	A	20	3	121	112	3.87	3.89	0	lalt	TRUE	1.37953	1	0	FALSE	-1.56682	17.0699	-9.93967	FALSE	FALSE	3	0.0217391	5.52356	4.93666	0.00901096
537	104	57	O	40	76	154	68	5.22	3.86	0	lalt	TRUE	2.07364	1	0.169143	FALSE	-4.10425	-21.8586	1.51896	FALSE	FALSE	18	0.0107527	6.53916	4.94786	0.00891872
538	104	58	A	20	157	193	131	3.64	3.74	0	ralt	FALSE	1.36569	1	0.106571	FALSE	13.9636	17.3734	-28.6872	FALSE	FALSE	1	0.0212766	5.55459	4.95104	0.00882833
539	104	59	D	20	75	124	89	5.05	5.09	1	ralt	TRUE	1.75882	1	0	FALSE	-12.3811	-14.4033	-14.8643	FALSE	FALSE	11	0.0631579	3.98489	4.93986	0.00412254
540	104	60	O	40	157	193	131	4.76	4.08	1	ralt	TRUE	2.3029	2	0	FALSE	7.80947	-3.65358	9.25473	FALSE	FALSE	19	0.03125	5	4.93832	0.00310665
541	104	61	O	40	0	168	107	3.57	4.2	0	lalt	TRUE	1.04298	2	0.11	FALSE	11.4212	-3.20332	-6.08185	FALSE	FALSE	20	0.0103093	6.59991	4.94966	0.00760113
542	104	62	O	40	157	193	131	4.96	4.68	1	ralt	TRUE	1.11314	2	0.0977143	FALSE	6.90185	-2.05917	-8.69895	FALSE	FALSE	19	0.0408163	4.61471	4.94467	0.00701724
543	104	63	T	40	138	154	91	3.6	5.34	0	lalt	TRUE	1.24214	2	0	FALSE	3.12219	9.95526	-9.07509	FALSE	FALSE	34	0.020202	5.62936	4.94847	0.00449893
544	104	64	D	20	3	121	112	3.94	3.75	0	ralt	FALSE	0.968209	2	0	FALSE	15.5062	16.495	-12.9769	FALSE	FALSE	9	0.02	5.64386	4.95233	0.00589538
545	104	65	A	20	138	154	91	4.82	5.06	0	ralt	FALSE	0.888377	2	0	FALSE	10.8582	9.62086	-4.98375	FALSE	FALSE	4	0.00990099	6.65821	4.96366	0.00824347
546	104	66	I	80	0	168	107	4.56	4.72	0	lalt	TRUE	1.07645	2	0	FALSE	4.39963	-5.00476	5.14373	FALSE	FALSE	14	0.00980392	6.67243	4.97491	0.0105459
547	104	67	D	20	75	124	89	4.42	4.53	1	ralt	TRUE	1.50039	2	0	FALSE	11.1191	-4.56093	5.83282	FALSE	FALSE	11	0.0679612	3.87915	4.96349	0.00603525
548	104	68	R	80	138	154	91	4.06	5.37	0	ralt	FALSE	1.09345	2	0	FALSE	-4.6918	-1.60553	9.44101	FALSE	FALSE	28	0.00961538	6.70044	4.97479	0.00598035
549	104	69	I	80	3	121	112	5.37	5.02	0	lalt	TRUE	1.25346	2	0	FALSE	-3.73292	-5.32568	14.4833	FALSE	FALSE	15	0.0190476	5.71425	4.97889	0.00794273
550	104	70	T	40	0	168	107	4.05	4.75	1	lalt	FALSE	1.26641	2	0	FALSE	2.34167	8.38128	-16.766	FALSE	FALSE	32	0.0377358	4.72792	4.97505	0.00422272
551	104	71	O	40	157	193	131	3.94	3.74	1	ralt	TRUE	1.04341	2	0.114571	FALSE	-13.9066	-16.2091	-1.94625	FALSE	FALSE	19	0.046729	4.41954	4.96871	0.00255005
552	104	72	A	20	3	121	112	5.44	4.58	0	lalt	TRUE	1.06858	2	0	FALSE	10.6095	1.82298	8.19806	FALSE	FALSE	3	0.0277778	5.16993	4.96862	0.00299235
553	104	73	D	20	75	124	89	5.2	4.82	1	lalt	FALSE	1.73958	2	0	FALSE	1.79484	4.73074	0.432605	FALSE	FALSE	11	0.0733945	3.76818	4.95698	0.00252302
554	104	74	O	40	157	193	131	5.21	4.57	1	ralt	TRUE	0.983567	2	0	FALSE	9.64066	10.8972	-5.62876	FALSE	FALSE	19	0.0545455	4.1964	4.94916	0.00157091
555	104	75	O	40	76	154	68	5.23	5.12	0	lalt	TRUE	1.84343	2	0	FALSE	10.2979	15.1217	-2.45155	FALSE	FALSE	18	0.018018	5.79442	4.95398	0.00357296
556	104	76	D	20	75	124	89	3.73	5.14	1	lalt	FALSE	1.04145	2	0	FALSE	8.18398	14.0641	0.398734	FALSE	FALSE	11	0.0803571	3.63743	4.9417	0.00321848
557	104	77	I	80	138	154	91	4.65	4.09	1	ralt	TRUE	1.6525	2	0	FALSE	10.6138	4.15671	-3.28209	FALSE	FALSE	16	0.0442478	4.49825	4.93668	0.00164243
558	104	78	T	40	0	168	107	4.91	4.96	1	lalt	FALSE	0.971587	2	0	FALSE	-2.39398	-9.3764	8.7659	FALSE	FALSE	32	0.0438596	4.51096	4.93185	0.00213598
559	104	79	R	80	138	154	91	4.25	4.58	0	lalt	TRUE	1.86852	2	0	FALSE	7.22996	7.8214	-4.7654	FALSE	FALSE	28	0.0173913	5.84549	4.93709	0.00364259
560	104	80	D	20	0	168	107	4.71	4.35	0	ralt	FALSE	1.67856	2	0	FALSE	11.7709	-6.17076	0.971976	FALSE	FALSE	8	0.0172414	5.85798	4.94235	0.00512341
561	104	81	O	40	157	193	131	4.99	3.88	1	ralt	TRUE	1.29058	2	0	FALSE	-12.3828	3.97479	21.2385	FALSE	FALSE	19	0.0598291	4.06301	4.93411	0.00327056
562	104	82	R	80	3	121	112	5.36	4.08	1	ralt	TRUE	1.38263	2	0	FALSE	9.12124	2.8096	-0.136362	FALSE	FALSE	27	0.0423729	4.56071	4.92989	0.00176012
563	104	83	T	40	157	193	131	4.73	4.86	0	lalt	TRUE	1.40761	2	0	FALSE	-5.24708	-18.9217	-3.26108	FALSE	FALSE	31	0.0336134	4.89482	4.92825	0.00231784
564	104	84	D	20	75	124	89	3.94	4.92	1	lalt	FALSE	1.81753	2	0.107143	FALSE	-8.21802	-13.0516	13.2788	FALSE	FALSE	11	0.0833333	3.58496	4.91662	0.00175766
565	104	85	R	80	3	121	112	5.11	4.93	1	ralt	TRUE	1.38164	2	0.129143	FALSE	-8.2453	3.12547	7.64622	FALSE	FALSE	27	0.0495868	4.3339	4.91096	0.00131134
566	104	86	R	80	3	121	112	4.17	5.37	1	ralt	TRUE	0.934633	2	0.104286	FALSE	1.59726	25.8455	-25.3247	FALSE	FALSE	27	0.057377	4.12338	4.90381	0.00334304
567	104	87	A	20	76	154	68	5.19	4.69	1	lalt	FALSE	1.3596	2	0	FALSE	-4.3509	25.9712	-2.85025	FALSE	FALSE	0	0.0650407	3.94251	4.8954	0.00130301
568	104	88	O	40	75	124	89	5.35	4.96	0	lalt	TRUE	1.33563	2	0	FALSE	-8.22801	-9.70356	-0.346085	FALSE	FALSE	23	0.016129	5.9542	4.90142	0.00300392
569	104	89	R	80	157	193	131	4.9	3.87	0	ralt	FALSE	1.80348	2	0.106286	FALSE	2.37846	-12.0589	9.27514	FALSE	FALSE	25	0.016	5.96578	4.90744	0.00477174
570	104	90	R	80	75	124	89	5.22	3.82	0	lalt	TRUE	0.975573	2	0	FALSE	-16.2859	-29.4839	22.6969	FALSE	FALSE	29	0.00793651	6.97728	4.91939	0.00666564
571	104	91	O	40	3	121	112	4.8	5.07	0	ralt	FALSE	1.10162	2	0.139714	FALSE	12.4827	10.4432	-16.3638	FALSE	FALSE	21	0.015748	5.98868	4.92535	0.00661498
572	104	92	O	40	157	193	131	3.58	3.51	1	ralt	TRUE	1.28861	2	0	FALSE	12.794	-13.3255	11.291	FALSE	FALSE	19	0.0625	4	4.91755	0.00291644
573	104	93	I	80	0	168	107	4.18	4.91	0	lalt	TRUE	0.888811	2	0	FALSE	9.38124	4.62052	-22.1324	FALSE	FALSE	14	0.0155039	6.01123	4.9236	0.00289536
574	104	94	O	40	0	168	107	4.13	3.99	0	lalt	TRUE	1.28787	2	0.130571	FALSE	0.479974	-6.75991	-7.0484	FALSE	FALSE	20	0.0153846	6.02237	4.92965	0.00459643
575	104	95	T	40	0	168	107	4.48	4.8	1	ralt	TRUE	1.62995	2	0	FALSE	-6.81852	23.9922	1.89481	FALSE	FALSE	32	0.0458015	4.44846	4.92518	0.00306183
576	104	96	D	20	75	124	89	3.86	4.01	1	lalt	FALSE	1.59593	2	0.107429	FALSE	1.63341	-1.22894	-3.85576	FALSE	FALSE	11	0.0833333	3.58496	4.91467	0.00117152
577	104	97	I	80	138	154	91	4.11	4.7	1	missing	FALSE		2	0.116571	FALSE	2.7109	6.06541	1.78619	TRUE	TRUE	16	0.0451128	4.47032	4.91054	0.00116401
578	104	98	R	80	3	121	112	4.86	5.14	1	ralt	TRUE	0.740063	2	0	FALSE	3.95229	-12.1909	4.97257	FALSE	FALSE	27	0.0597015	4.06609	4.90368	0.00132663
579	104	99	I	80	138	154	91	3.77	3.51	1	lalt	FALSE	0.877088	2	0.121714	FALSE	-4.39809	-3.42544	-14.4119	FALSE	FALSE	16	0.0518519	4.26946	4.89834	0.00120345
580	104	100	A	20	157	193	131	5.24	4.21	0	lalt	TRUE	1.68621	2	0.100857	FALSE	-5.24856	-1.49809	24.6026	FALSE	FALSE	1	0.0220588	5.5025	4.9012	0.00215074
581	104	101	D	20	0	168	107	4.72	5.43	0	ralt	FALSE	1.95519	2	0.128	FALSE	3.99832	-20.9696	9.18838	FALSE	FALSE	8	0.0218978	5.51307	4.90409	0.00299853
582	104	102	D	20	75	124	89	4.29	5.42	1	lalt	FALSE	1.61311	2	0	FALSE	0.418716	-16.8775	6.41509	FALSE	FALSE	11	0.0869565	3.52356	4.89378	0.00183456
583	104	103	D	20	75	124	89	4.66	5.34	1	lalt	FALSE	1.52608	2	0.119714	FALSE	15.4369	-18.0684	6.19186	FALSE	FALSE	11	0.0935252	3.4185	4.88289	0.00148068
584	104	104	A	20	76	154	68	4.93	3.91	1	lalt	FALSE	1.83994	2	0	FALSE	5.42453	-5.46831	2.07945	FALSE	FALSE	0	0.0642857	3.95936	4.87583	0.000785776
585	104	105	T	40	3	121	112	3.65	4.81	0	lalt	TRUE	1.27505	2	0.16	FALSE	7.46352	-5.28759	-5.63988	FALSE	FALSE	33	0.0070922	7.13955	4.88788	0.00432485
586	104	106	I	80	76	154	68	5.07	5.18	0	lalt	TRUE	0.828201	2	0	FALSE	5.44268	22.745	6.23828	FALSE	FALSE	12	0.0211268	5.56478	4.89113	0.00527547
587	104	107	O	40	157	193	131	5.15	5.35	1	ralt	TRUE	1.19215	2	0.118571	FALSE	3.66664	4.83045	-16.5012	FALSE	FALSE	19	0.0629371	3.98995	4.88437	0.00190671
588	104	108	I	80	138	154	91	3.88	5.09	1	lalt	FALSE	0.9341	2	0.205714	FALSE	-1.21689	-13.1091	35.3752	FALSE	FALSE	16	0.0555556	4.16993	4.87888	0.000992288
589	104	109	R	80	138	154	91	5.24	3.64	0	ralt	FALSE	1.34114	2	0	FALSE	1.59058	4.07065	-18.8526	FALSE	FALSE	28	0.0206897	5.59495	4.88233	0.00194616
590	104	110	T	40	3	121	112	3.99	3.85	0	lalt	TRUE	1.58216	2	0.107143	FALSE	-1.79485	11.4412	8.51187	FALSE	FALSE	33	0.0136986	6.18982	4.88913	0.00346829
591	104	111	T	40	0	168	107	3.86	3.58	1	lalt	FALSE	1.23131	2	0	FALSE	-5.20282	-11.1097	-10.9124	FALSE	FALSE	32	0.047619	4.39232	4.88514	0.00264179
592	104	112	A	20	157	193	131	5.24	3.67	0	missing	FALSE		2	0.00485714	FALSE	4.07058	-1.7409	-0.0465274	TRUE	TRUE	1	0.027027	5.20945	4.88623	0.00165014
593	104	113	D	20	76	154	68	3.97	4.85	0	lalt	TRUE	1.74439	2	0.132571	FALSE	12.0656	13.7948	-14.8242	FALSE	FALSE	6	0.0201342	5.63421	4.8898	0.00243328
594	104	114	T	40	76	154	68	4.08	4.37	0	lalt	TRUE	1.42739	2	0.103429	FALSE	10.4019	27.2708	8.28758	FALSE	FALSE	30	0.02	5.64386	4.89339	0.00275252
595	104	115	O	40	157	193	131	5.2	5.02	1	ralt	TRUE	1.41152	2	0.211143	FALSE	-9.56343	-9.23197	-2.819	FALSE	FALSE	19	0.0662252	3.91648	4.88653	0.00176413
596	104	116	A	20	76	154	68	4.16	3.51	1	ralt	TRUE	0.876485	2	0.115714	FALSE	1.94212	2.5831	16.0657	FALSE	FALSE	0	0.0657895	3.926	4.87983	0.000788645
597	104	117	D	20	157	193	131	5.38	4.03	0	lalt	TRUE	1.08062	2	0.136	FALSE	11.9392	12.0691	-18.4632	FALSE	FALSE	7	0.00653595	7.25739	4.89168	0.00394967
598	104	118	O	40	138	154	91	3.59	4.71	0	missing	FALSE		2	0.13	FALSE	13.2667	19.2457	-40.2534	TRUE	TRUE	22	0.0194805	5.68182	4.8954	0.00487731
599	104	119	R	80	0	168	107	5.34	4.76	0	lalt	TRUE	0.773691	2	0.126286	FALSE	10.2653	3.13129	-12.6408	FALSE	FALSE	26	0.0193548	5.69116	4.89914	0.0026683
600	104	120	R	80	75	124	89	4.82	3.79	0	ralt	FALSE	1.04116	3	0.130857	FALSE	13.0248	-27.9327	17.6733	FALSE	FALSE	29	0.0128205	6.2854	4.90601	0.00325549
601	104	121	O	40	138	154	91	3.73	5.1	0	lalt	TRUE	0.678349	3	0.123143	FALSE	-0.087798	10.6569	-12.748	FALSE	FALSE	22	0.0254777	5.29462	4.90744	0.00291595
602	104	122	I	80	138	154	91	4.14	3.84	1	ralt	TRUE	0.700432	3	0	FALSE	-8.07211	0.416493	11.6257	FALSE	FALSE	16	0.056962	4.13386	4.90212	0.00142126
603	104	123	R	80	3	121	112	3.97	3.66	1	ralt	TRUE	0.763636	3	0	FALSE	-3.86912	3.53579	-1.66885	FALSE	FALSE	27	0.0566038	4.14296	4.89692	0.00085304
604	104	124	O	40	0	168	107	4.64	3.84	0	lalt	TRUE	0.962797	3	0.105714	FALSE	-6.46817	1.60351	11.9524	FALSE	FALSE	20	0.01875	5.73697	4.90082	0.00171875
605	104	125	D	20	138	154	91	5.02	5.02	0	lalt	TRUE	1.03992	3	0	FALSE	-6.50391	-6.10069	14.0842	FALSE	FALSE	10	0.0124224	6.33092	4.90774	0.00315857
606	104	126	I	80	157	193	131	3.82	5.49	0	lalt	TRUE	1.43087	3	0	FALSE	1.52135	-7.27662	2.60747	FALSE	FALSE	13	0.00617284	7.33985	4.91927	0.00522484
607	104	127	R	80	157	193	131	4.52	4.25	0	lalt	TRUE	1.52487	3	0	FALSE	9.37455	3.52515	-6.66937	FALSE	FALSE	25	0.0184049	5.76377	4.92312	0.00461599
608	104	128	A	20	0	168	107	4.03	4.11	0	ralt	FALSE	1.17493	3	0.133143	FALSE	6.10279	-11.8103	20.4294	FALSE	FALSE	2	0.0182927	5.77259	4.92698	0.00252897
609	104	129	A	20	76	154	68	4.79	5.48	1	ralt	TRUE	1.07104	3	0.112857	FALSE	-2.90561	-16.1912	5.21429	FALSE	FALSE	0	0.0666667	3.90689	4.92048	0.001588
610	104	130	O	40	3	121	112	4.55	4.46	0	missing	FALSE		3	0.11	FALSE	0.00652879	1.71357	1.39214	TRUE	TRUE	21	0.0180723	5.79008	4.92441	0.00157912
611	104	131	I	80	75	124	89	4.07	4.16	0	lalt	TRUE	1.23296	3	0.106286	FALSE	-24.8466	-15.1137	9.62815	FALSE	FALSE	17	0.00598802	7.3837	4.93576	0.00450862
612	104	132	I	80	138	154	91	4.21	4.19	1	lalt	FALSE	1.13308	3	0	FALSE	21.601	27.3498	-18.44	FALSE	FALSE	16	0.0595238	4.07039	4.93025	0.00360911
613	104	133	D	20	75	124	89	4.42	4.83	1	lalt	FALSE	1.13118	3	0.115429	FALSE	7.0374	1.75003	14.1026	FALSE	FALSE	11	0.0828402	3.59352	4.92211	0.000606333
614	104	134	I	80	75	124	89	4.07	4.4	0	lalt	TRUE	1.56219	3	0.111714	FALSE	-10.9316	-8.59762	15.1463	FALSE	FALSE	17	0.0117647	6.40939	4.92901	0.00202062
615	104	135	O	40	157	193	131	4.79	4.02	1	ralt	TRUE	1.23222	3	0.115429	FALSE	0.77549	-10.3125	20.8194	FALSE	FALSE	19	0.0643275	3.95842	4.92302	0.00208698
616	104	136	O	40	157	193	131	4.21	5.49	1	ralt	TRUE	0.796376	3	0	FALSE	2.90753	7.32431	-23.584	FALSE	FALSE	19	0.0697674	3.8413	4.91645	0.00133472
617	104	137	D	20	0	168	107	3.58	4.91	0	ralt	FALSE	1.8983	3	0.105714	FALSE	-13.6595	1.95486	19.6954	FALSE	FALSE	8	0.0231214	5.43463	4.9185	0.00119967
618	104	138	O	40	76	154	68	3.62	3.86	0	lalt	TRUE	1.2334	3	0.110571	FALSE	0.809523	9.88629	-13.6377	FALSE	FALSE	18	0.0172414	5.85798	4.92265	0.00210163
619	104	139	O	40	157	193	131	4.33	5.47	1	ralt	TRUE	1.03558	3	0	FALSE	17.75	-7.98405	28.6889	FALSE	FALSE	19	0.0742857	3.75077	4.9157	0.00144917
620	104	140	R	80	3	121	112	4.02	4.19	1	ralt	TRUE	0.903593	3	0.0128571	FALSE	7.59083	2.46845	-24.7506	FALSE	FALSE	27	0.0568182	4.1375	4.91094	0.000607548
621	104	141	R	80	3	121	112	3.98	3.96	1	ralt	TRUE	0.806846	3	0.117429	FALSE	3.379	7.89277	-6.33242	FALSE	FALSE	27	0.0621469	4.00817	4.90553	0.00143084
622	104	142	I	80	138	154	91	4.71	3.97	1	lalt	FALSE	0.699896	3	0	FALSE	-2.21533	8.31878	12.8814	FALSE	FALSE	16	0.0617978	4.0163	4.90023	0.000620729
623	104	143	R	80	3	121	112	4.44	5.1	1	ralt	TRUE	0.970976	3	0.116857	FALSE	-10.1964	-18.629	0.168225	FALSE	FALSE	27	0.0670391	3.89885	4.89436	0.000589081
624	104	144	T	40	0	168	107	3.78	5.47	1	lalt	FALSE	1.237	3	0	FALSE	21.6125	29.19	-16.4059	FALSE	FALSE	32	0.0444444	4.49185	4.89168	0.000713143
625	104	145	A	20	138	154	91	4.89	4.43	0	lalt	TRUE	1.02803	3	0.0991429	FALSE	2.18121	-28.1418	17.2358	FALSE	FALSE	4	0.0110497	6.49985	4.89882	0.00210358
626	104	146	R	80	3	121	112	3.98	4.04	1	ralt	TRUE	0.995087	3	0	FALSE	8.6357	-1.6886	-5.9739	FALSE	FALSE	27	0.0714286	3.80735	4.89259	0.0019149
627	104	147	O	40	157	193	131	5.12	4.71	1	lalt	FALSE	0.982247	3	0.105143	FALSE	-10.3428	-16.9924	27.8013	FALSE	FALSE	19	0.0765027	3.70834	4.8859	0.000481858
628	104	148	R	80	3	121	112	5.3	3.92	1	ralt	TRUE	0.56823	3	0	FALSE	-3.27619	-3.19813	-8.36687	FALSE	FALSE	27	0.076087	3.71621	4.87932	0.000459298
629	104	149	D	20	157	193	131	4.34	3.93	0	lalt	TRUE	1.1003	3	0.100857	FALSE	7.88305	-1.00753	3.05776	FALSE	FALSE	7	0.0108108	6.53138	4.88655	0.00186509
630	104	150	T	40	0	168	107	3.83	5.22	1	lalt	FALSE	1.53939	3	0	FALSE	-16.8714	-18.7451	13.9966	FALSE	FALSE	32	0.0483871	4.36923	4.88339	0.00199993
631	104	151	A	20	76	154	68	3.58	4.19	1	lalt	FALSE	0.994431	3	0	FALSE	8.77059	-12.1112	18.2253	FALSE	FALSE	0	0.0641711	3.96193	4.8782	0.000640357
632	104	152	O	40	75	124	89	4.5	4.85	0	lalt	TRUE	1.27057	3	0.129143	FALSE	-0.00352624	-7.41796	-16.0093	FALSE	FALSE	23	0.0159574	5.96963	4.88284	0.00137878
633	104	153	T	40	3	121	112	4.85	3.59	0	ralt	FALSE	1.12762	3	0.106	FALSE	-20.3355	-15.0613	31.8032	FALSE	FALSE	33	0.015873	5.97728	4.88748	0.00220851
634	104	154	T	40	3	121	112	5.4	5.27	0	lalt	TRUE	1.23068	3	0.157714	FALSE	-10.058	-5.34883	-10.5676	FALSE	FALSE	33	0.0210526	5.56986	4.8902	0.00410589
635	104	155	D	20	75	124	89	3.54	5.09	1	lalt	FALSE	1.44161	3	0.402571	TRUE	7.01788	33.5046	-4.49657	FALSE	FALSE	11	0.078534	3.67054	4.88362	0.00103577
636	104	156	D	20	75	124	89	4.02	5.21	1	lalt	FALSE	0.836713	3	0.0411429	FALSE	-18.5033	-16.0021	-5.90387	FALSE	FALSE	11	0.0833333	3.58496	4.87668	0.000877118
637	104	157	D	20	3	121	112	4.99	5.41	0	ralt	FALSE	0.727785	3	0.118	FALSE	5.16398	-4.9816	11.4036	FALSE	FALSE	9	0.015544	6.00749	4.88141	0.0012714
638	104	158	A	20	76	154	68	5.37	5.07	1	lalt	FALSE	0.857721	3	0.120286	FALSE	10.6988	11.3716	-15.1169	FALSE	FALSE	0	0.0670103	3.89947	4.87611	0.00131628
639	104	159	O	40	76	154	68	4.3	5.07	0	lalt	TRUE	0.863709	3	0.0345714	FALSE	25.7595	16.8651	-14.2529	FALSE	FALSE	18	0.0205128	5.60733	4.87901	0.00105225
640	104	160	R	80	75	124	89	3.87	3.54	0	lalt	TRUE	0.863731	3	0.385429	FALSE	12.075	27.7209	-18.7605	FALSE	FALSE	29	0.0153061	6.02975	4.88377	0.00187642
641	104	161	D	20	138	154	91	4.45	3.86	0	lalt	TRUE	0.81292	3	0	FALSE	20.1613	22.2452	-13.1553	FALSE	FALSE	10	0.0152284	6.03709	4.88851	0.00212242
642	104	162	T	40	0	168	107	3.84	5.28	1	lalt	FALSE	1.34305	3	0.224571	FALSE	10.0034	22.8916	-15.8527	FALSE	FALSE	32	0.0505051	4.30743	4.88526	0.00137036
643	104	163	R	80	3	121	112	5.12	4.41	1	ralt	TRUE	0.822104	3	0.138571	FALSE	-11.251	5.7589	1.46827	FALSE	FALSE	27	0.0753769	3.72973	4.87926	0.000511876
644	104	164	T	40	138	154	91	5.43	4.75	0	lalt	TRUE	0.787149	3	0.112857	FALSE	-10.009	-15.7119	20.8714	FALSE	FALSE	34	0.015	6.05889	4.88407	0.00124408
645	104	165	T	40	75	124	89	5.31	4.08	0	lalt	TRUE	0.498179	3	0.277714	FALSE	-0.264046	5.84813	-19.129	FALSE	FALSE	35	0.0149254	6.06609	4.88886	0.00208184
646	104	166	I	80	138	154	91	4.42	3.82	1	lalt	FALSE	0.261272	3	0.37	FALSE	-15.8808	-15.4011	0.334096	FALSE	FALSE	16	0.0594059	4.07325	4.88457	0.00128895
647	104	167	I	80	157	193	131	4.59	5.17	0	lalt	TRUE	1.25235	3	0.459429	TRUE	1.62507	-20.5344	28.3781	FALSE	FALSE	13	0.00985222	6.66534	4.89179	0.00174737
648	104	168	T	40	0	168	107	4.78	4.19	1	lalt	FALSE	0.825376	3	0	FALSE	-6.42383	-8.14014	-16.4696	FALSE	FALSE	32	0.0539216	4.21299	4.88819	0.00176439
649	104	169	I	80	76	154	68	3.53	4.37	0	lalt	TRUE	1.14442	3	0.122	FALSE	5.13932	-2.18051	6.72206	FALSE	FALSE	12	0.0195122	5.67948	4.89123	0.00105108
650	104	170	R	80	3	121	112	5.45	4.39	1	ralt	TRUE	1.25258	3	0	FALSE	2.65289	26.185	-9.24309	FALSE	FALSE	27	0.0776699	3.6865	4.88522	0.000952122
651	104	171	R	80	3	121	112	5.06	3.53	1	ralt	TRUE	0.589604	3	0	FALSE	-5.61437	13.4868	25.0074	FALSE	FALSE	27	0.0821256	3.60602	4.87888	0.000765857
652	104	172	I	80	3	121	112	3.76	4.01	0	lalt	TRUE	1.07768	3	0.289714	FALSE	-7.72055	2.52821	-8.23006	FALSE	FALSE	15	0.0144231	6.11548	4.88378	0.00117313
653	104	173	T	40	0	168	107	4.48	5.5	1	lalt	FALSE	0.793897	3	0.119429	FALSE	19.8265	14.7115	-9.32267	FALSE	FALSE	32	0.0574163	4.1224	4.87989	0.00124827
654	104	174	R	80	138	154	91	3.67	4.46	0	lalt	TRUE	0.640903	3	0.473429	TRUE	-2.7724	0.788035	-5.72736	FALSE	FALSE	28	0.0190476	5.71425	4.88307	0.00100328
655	104	175	I	80	3	121	112	4.84	5.11	0	lalt	TRUE	0.885035	3	0.154571	FALSE	17.911	20.4556	-11.5696	FALSE	FALSE	15	0.0189573	5.7211	4.88625	0.00151035
656	104	176	A	20	76	154	68	5.07	5.21	1	lalt	FALSE	0.898026	3	0.220286	FALSE	-3.58488	-10.3624	41.805	FALSE	FALSE	0	0.0660377	3.92057	4.8815	0.00095612
657	104	177	I	80	75	124	89	4.42	4.47	0	missing	FALSE		3	0.238571	FALSE	6.44211	16.0826	-2.09017	TRUE	TRUE	17	0.0140845	6.14975	4.88642	0.00118798
658	104	178	I	80	0	168	107	4.23	4.64	0	lalt	TRUE	0.836966	3	0.226	FALSE	19.3257	48.6448	-29.1223	FALSE	FALSE	14	0.0140187	6.1565	4.89133	0.00196003
659	104	179	T	40	138	154	91	4.86	4.27	0	lalt	TRUE	1.52699	3	0.130571	FALSE	-1.89073	-14.6866	-56.4363	FALSE	FALSE	34	0.0186047	5.74819	4.89454	0.0017174
660	104	180	A	20	76	154	68	5.28	5.13	1	ralt	TRUE	0.648257	4	0	FALSE	14.5855	13.4258	10.9939	FALSE	FALSE	0	0.0694444	3.848	4.88952	0.000924525
661	104	181	O	40	0	168	107	4.51	4.21	0	lalt	TRUE	0.720245	4	0	FALSE	-17.8544	-15.7448	49.1492	FALSE	FALSE	20	0.0184332	5.76155	4.89277	0.000920567
662	104	182	R	80	3	121	112	4.4	4.37	1	lalt	FALSE	0.724347	4	0.106286	FALSE	4.63277	9.24491	-42.5586	FALSE	FALSE	27	0.0825688	3.59826	4.88669	0.000881471
663	104	183	T	40	75	124	89	3.58	4.13	0	lalt	TRUE	0.799443	4	0	FALSE	1.54243	6.20675	-9.2355	FALSE	FALSE	35	0.0182648	5.77479	4.88999	0.000877739
664	104	184	A	20	75	124	89	4.48	3.63	0	lalt	TRUE	0.81462	4	0.113714	FALSE	-20.1049	-10.2487	14.2386	FALSE	FALSE	5	0.0136364	6.1964	4.89493	0.00167993
665	104	185	O	40	157	193	131	4.71	4.91	1	ralt	TRUE	1.60072	4	0.101714	FALSE	-7.8304	1.09072	0.0587745	FALSE	FALSE	19	0.0678733	3.88101	4.89016	0.00113259
666	104	186	T	40	0	168	107	4.98	3.55	1	ralt	TRUE	1.2387	4	0	FALSE	7.32097	-6.13248	20.2361	FALSE	FALSE	32	0.0585586	4.09398	4.88636	0.00039532
667	104	187	I	80	0	168	107	5.15	5.05	0	lalt	TRUE	0.866755	4	0.112857	FALSE	-0.788454	-15.0141	13.1749	FALSE	FALSE	14	0.0179372	5.8009	4.88972	0.00092904
668	104	188	T	40	0	168	107	3.6	4.13	1	lalt	FALSE	0.994784	4	0.102571	FALSE	-11.5904	7.13372	15.3836	FALSE	FALSE	32	0.0625	4	4.88555	0.000908378
669	104	189	I	80	138	154	91	4.51	4.96	1	ralt	TRUE	1.21294	4	0.0914286	FALSE	7.59813	-22.7461	-3.38058	FALSE	FALSE	16	0.0577778	4.11334	4.88191	0.000405375
670	104	190	O	40	157	193	131	5.02	4.8	1	ralt	TRUE	0.907971	4	0.104286	FALSE	8.74071	-2.93064	4.06844	FALSE	FALSE	19	0.0707965	3.82018	4.87705	0.000376674
671	104	191	A	20	76	154	68	4.45	4.1	1	ralt	TRUE	1.01297	4	0	FALSE	5.12275	32.0323	5.14858	FALSE	FALSE	0	0.0704846	3.82655	4.87227	0.000331653
672	104	192	O	40	157	193	131	4.79	4.66	1	ralt	TRUE	0.882101	4	0.102	FALSE	-39.0512	-32.1115	31.7509	FALSE	FALSE	19	0.0745614	3.74543	4.86718	0.000319316
673	104	193	O	40	75	124	89	5.06	4.33	0	lalt	TRUE	1.47808	4	0.0202857	FALSE	-11.0073	8.19082	8.56246	FALSE	FALSE	23	0.0174672	5.8392	4.87069	0.00085196
674	104	194	O	40	157	193	131	5.14	4.79	1	missing	FALSE		4	0.118571	FALSE	-6.78714	-19.887	3.91001	TRUE	TRUE	19	0.0782609	3.67557	4.86536	0.000838678
675	104	195	I	80	75	124	89	3.9	4.79	0	lalt	TRUE	0.925966	4	0.237143	FALSE	-25.879	-14.9064	7.7189	FALSE	FALSE	17	0.017316	5.85175	4.86891	0.000835298
676	104	196	A	20	76	154	68	4.91	4.75	1	lalt	FALSE	1.17905	4	0.110571	FALSE	21.3849	19.4339	-10.8827	FALSE	FALSE	0	0.0732759	3.77052	4.86403	0.000841692
677	104	197	A	20	138	154	91	4.04	4.41	0	lalt	TRUE	0.465107	4	0.104857	FALSE	2.37978	1.80268	-0.613784	FALSE	FALSE	4	0.0128755	6.27922	4.86916	0.00105418
678	104	198	I	80	138	154	91	4.71	3.55	1	lalt	FALSE	0.787229	4	0.204571	FALSE	-2.46417	-11.3166	6.95994	FALSE	FALSE	16	0.0598291	4.06301	4.86553	0.00108701
679	104	199	A	20	0	168	107	5.5	4.06	0	lalt	TRUE	1.09934	4	0.11	FALSE	10.2894	5.64261	5.55108	FALSE	FALSE	2	0.0170213	5.87652	4.86912	0.000868601
680	104	200	T	40	0	168	107	4.99	4.54	1	lalt	FALSE	1.16835	4	0.0977143	FALSE	0.357296	8.09707	-11.2526	FALSE	FALSE	32	0.0635593	3.97575	4.86516	0.000851297
681	104	201	I	80	157	193	131	4.02	4.69	0	ralt	FALSE	1.12225	4	0.119429	FALSE	-1.50984	-0.41501	-12.9278	FALSE	FALSE	13	0.0126582	6.30378	4.8703	0.00106016
682	104	202	D	20	3	121	112	4.9	5.47	0	lalt	TRUE	1.62341	4	0	FALSE	0.747107	10.2471	-10.3248	FALSE	FALSE	9	0.0168067	5.89482	4.87391	0.00155757
683	104	203	I	80	138	154	91	5.27	4.94	1	lalt	FALSE	2.10232	4	0.102	FALSE	-14.95	-16.1118	13.0286	FALSE	FALSE	16	0.0627615	3.99398	4.87006	0.000841297
684	104	204	T	40	0	168	107	4.12	5.33	1	lalt	FALSE	1.1792	4	0	FALSE	4.55386	26.1193	-6.99751	FALSE	FALSE	32	0.0666667	3.90689	4.86589	0.000328587
685	104	205	D	20	75	124	89	3.6	4.69	1	lalt	FALSE	1.01323	4	0.0868571	FALSE	-3.74711	-7.99104	12.9937	FALSE	FALSE	11	0.0705394	3.82543	4.86143	0.000304991
686	104	206	A	20	76	154	68	4.37	5.04	1	ralt	TRUE	0.883374	4	0.101143	FALSE	12.9838	-2.08342	-16.0393	FALSE	FALSE	0	0.0743802	3.74894	4.8567	0.000284103
687	104	207	R	80	76	154	68	5.49	4.43	0	lalt	TRUE	0.974407	4	0	FALSE	-11.0506	2.59185	9.46251	FALSE	FALSE	24	0.0123457	6.33985	4.8619	0.00100376
688	104	208	D	20	138	154	91	4.21	5.33	0	lalt	TRUE	1.10138	4	0.0988571	FALSE	11.3122	4.04615	6.59879	FALSE	FALSE	10	0.0163934	5.93074	4.86559	0.00152065
689	104	209	A	20	76	154	68	4.94	5.21	1	lalt	FALSE	0.941394	4	0.104286	FALSE	5.90623	-7.14835	12.1001	FALSE	FALSE	0	0.077551	3.68871	4.86067	0.000782394
690	104	210	D	20	75	124	89	5.4	4.43	1	lalt	FALSE	0.847407	4	0.109143	FALSE	-3.67494	-1.26121	-12.0669	FALSE	FALSE	11	0.0731707	3.77259	4.85612	0.000262851
691	104	211	R	80	157	193	131	4.1	3.87	0	lalt	TRUE	0.770425	4	0.100286	FALSE	4.00245	-2.73677	-3.43691	FALSE	FALSE	25	0.0161943	5.94837	4.85986	0.00078468
692	104	212	A	20	3	121	112	4.15	3.83	0	lalt	TRUE	1.37952	4	0	FALSE	-0.818486	-7.75015	-6.43219	FALSE	FALSE	3	0.016129	5.9542	4.8636	0.00129414
693	104	213	I	80	138	154	91	5.41	4.83	1	ralt	TRUE	1.87955	4	0.103143	FALSE	4.30433	-9.80581	7.44878	FALSE	FALSE	16	0.064257	3.96	4.85982	0.000798061
694	104	214	D	20	157	193	131	4.74	4.42	0	lalt	TRUE	1.16058	4	0.102571	FALSE	23.8757	21.6791	-13.9976	FALSE	FALSE	7	0.012	6.38082	4.86502	0.0009963
695	104	215	D	20	75	124	89	4.81	3.63	1	lalt	FALSE	0.762627	4	0	FALSE	13.82	-11.3521	2.6866	FALSE	FALSE	11	0.0756972	3.72362	4.86036	0.00096532
696	104	216	T	40	0	168	107	4.98	5.1	1	lalt	FALSE	0.800745	4	0.101714	FALSE	1.18977	3.73975	2.13993	FALSE	FALSE	32	0.0674603	3.88982	4.85637	0.000266701
697	104	217	A	20	75	124	89	4.17	3.57	0	lalt	TRUE	1.07971	4	0.0471429	FALSE	10.1374	4.58445	-5.94067	FALSE	FALSE	5	0.0158103	5.98299	4.86016	0.000776179
698	104	218	D	20	157	193	131	4.85	5.39	0	lalt	TRUE	1.07789	4	0.098	FALSE	-3.84851	18.6618	-19.7864	FALSE	FALSE	7	0.015748	5.98868	4.86394	0.00126477
699	104	219	A	20	76	154	68	4.86	3.61	1	lalt	FALSE	0.946849	4	0	FALSE	-2.51436	-15.0831	7.25481	FALSE	FALSE	0	0.0784314	3.67243	4.85916	0.000746469
700	104	220	T	40	0	168	107	3.85	5.36	1	lalt	FALSE	0.448986	4	0	FALSE	-19.9528	-4.81597	15.2114	FALSE	FALSE	32	0.0703125	3.83007	4.85501	0.000247267
701	104	221	I	80	138	154	91	5.14	4	1	ralt	TRUE	1.2861	4	0.0937143	FALSE	19.7333	-0.914429	1.40329	FALSE	FALSE	16	0.0661479	3.91816	4.85123	0.00027029
702	104	222	O	40	157	193	131	4.91	5.08	1	ralt	TRUE	0.915005	4	0	FALSE	-4.96306	-3.81345	10.8878	FALSE	FALSE	19	0.0736434	3.7633	4.84689	0.000261553
703	104	223	A	20	138	154	91	5.22	5.07	0	ralt	FALSE	1.71795	4	0.0982857	FALSE	-0.538281	-30.0236	15.2791	FALSE	FALSE	4	0.015444	6.01681	4.85076	0.00074272
704	104	224	R	80	76	154	68	5.23	3.86	0	lalt	TRUE	1.35897	4	0	FALSE	0.132424	-15.4964	9.262	FALSE	FALSE	24	0.0153846	6.02237	4.85462	0.0012367
705	104	225	R	80	75	124	89	5.43	4.34	0	lalt	TRUE	0.960039	4	0	FALSE	14.3478	41.3558	-36.9274	FALSE	FALSE	29	0.0153257	6.02791	4.85847	0.00123214
706	104	226	O	40	3	121	112	3.75	5.09	0	lalt	TRUE	1.208	4	0.100286	FALSE	18.036	34.0739	-25.2783	FALSE	FALSE	21	0.0152672	6.03342	4.86232	0.00122762
707	104	227	T	40	0	168	107	3.62	4.18	1	lalt	FALSE	0.948086	4	0	FALSE	-14.8568	9.39411	2.34268	FALSE	FALSE	32	0.0722433	3.79099	4.85813	0.00073211
708	104	228	R	80	3	121	112	4.8	3.99	1	ralt	TRUE	0.501276	4	0.104857	FALSE	22.1026	18.9462	-3.39445	FALSE	FALSE	27	0.0719697	3.79647	4.85399	0.000240339
709	104	229	T	40	76	154	68	3.94	4.51	0	ralt	FALSE	1.18733	4	0.0931429	FALSE	-16.9769	-6.0596	3.71788	FALSE	FALSE	30	0.0150943	6.04985	4.85787	0.000726917
710	104	230	I	80	138	154	91	5.29	4.52	1	ralt	TRUE	1.04045	4	0.101714	FALSE	10.7534	26.8934	-14.9064	FALSE	FALSE	16	0.0676692	3.88536	4.85409	0.000731974
711	104	231	T	40	0	168	107	4.58	3.84	1	lalt	FALSE	0.613486	4	0.0982857	FALSE	3.81184	-6.32727	-3.88006	FALSE	FALSE	32	0.0749064	3.73877	4.84981	0.000238856
712	104	232	R	80	0	168	107	5.07	3.62	0	lalt	TRUE	0.602615	4	0.201714	FALSE	11.2564	0.0977628	-27.4781	FALSE	FALSE	26	0.0149254	6.06609	4.85372	0.00071244
713	104	233	R	80	3	121	112	4.4	4.71	1	ralt	TRUE	1.01668	4	0.13	FALSE	5.44341	7.63524	-8.82396	FALSE	FALSE	27	0.0743494	3.74953	4.84951	0.00070995
714	104	234	D	20	75	124	89	4.33	5.44	1	lalt	FALSE	1.29473	4	0.216	FALSE	22.3844	26.8518	-18.8186	FALSE	FALSE	11	0.0740741	3.75489	4.84535	0.000222368
715	104	235	I	80	138	154	91	3.56	5.15	1	ralt	TRUE	0.717758	4	0	FALSE	8.49377	1.55511	0.668579	FALSE	FALSE	16	0.0701107	3.83422	4.8415	0.000228445
716	104	236	O	40	157	193	131	5.45	4.67	1	ralt	TRUE	0.759865	4	0.100286	FALSE	11.2517	-3.67785	8.5457	FALSE	FALSE	19	0.0735294	3.76553	4.83744	0.000227752
717	104	237	I	80	138	154	91	4.63	3.78	1	ralt	TRUE	0.834849	4	0.117429	FALSE	-6.58335	4.98504	-6.12677	FALSE	FALSE	16	0.0732601	3.77083	4.83343	0.000220363
718	104	238	D	20	76	154	68	3.65	4.33	0	ralt	FALSE	0.795949	4	0.120571	FALSE	3.9405	21.0056	-15.0841	FALSE	FALSE	6	0.0145985	6.09803	4.83743	0.000697756
719	104	239	I	80	157	193	131	5.06	4.33	0	ralt	FALSE	0.812077	4	0.111429	FALSE	25.6248	35.565	-8.75519	FALSE	FALSE	13	0.0145455	6.10329	4.84142	0.00117169
720	105	0	O	20	3	121	112	3.76	4.95	0	lalt	FALSE	0.570313	1	0	FALSE	0.82599	-4.40906	30.0055	FALSE	FALSE	21	0.0277778	5.16993	5.1554	0.0145257
721	105	1	O	20	75	124	89	4.73	4.82	0	ralt	TRUE	1.00936	1	0	FALSE	7.40161	-35.2635	35.3047	FALSE	FALSE	23	0.027027	5.20945	5.14266	0.0272606
722	105	2	R	80	3	121	112	5.39	4.5	0	lalt	FALSE	2.43019	1	0	FALSE	20.1367	29.5898	-48.629	FALSE	FALSE	27	0.0263158	5.24793	5.13156	0.0266152
723	105	3	I	40	0	168	107	5.49	3.83	1	ralt	FALSE	2.11118	1	0	FALSE	-1.18688	-8.60437	9.36372	FALSE	FALSE	14	0.025641	5.2854	5.12193	0.0259994
724	105	4	T	80	75	124	89	5.43	4.14	0	ralt	TRUE	1.27198	1	0	FALSE	19.7353	35.2415	-26.3922	FALSE	FALSE	35	0.025	5.32193	5.11365	0.0254112
725	105	5	A	20	157	193	131	3.7	4.16	0	ralt	TRUE	1.42891	1	0	FALSE	11.6487	-0.788016	2.70416	FALSE	FALSE	1	0.0243902	5.35755	5.1066	0.0248488
726	105	6	R	80	138	154	91	5.22	4.89	1	ralt	FALSE	1.32298	1	0	FALSE	3.48006	-15.2312	19.2593	FALSE	FALSE	28	0.0238095	5.39232	5.10068	0.0243105
727	105	7	D	40	75	124	89	4.74	4.12	0	lalt	FALSE	1.86379	1	0.104571	FALSE	18.35	-2.45819	-2.55028	FALSE	FALSE	11	0.0232558	5.42626	5.0958	0.0237949
728	105	8	O	20	138	154	91	4.68	5.16	0	lalt	FALSE	1.08184	1	0.122857	FALSE	7.91311	15.6704	-14.0744	FALSE	FALSE	22	0.0227273	5.45943	5.09185	0.0233005
729	105	9	T	80	3	121	112	5.43	4.74	1	ralt	FALSE	1.23073	1	0.118571	FALSE	9.74873	-32.28	18.4428	FALSE	FALSE	33	0.0222222	5.49185	5.08878	0.0228262
730	105	10	I	40	76	154	68	4.61	4.53	0	lalt	FALSE	1.21362	1	0.124857	FALSE	-13.374	-20.6509	16.0172	FALSE	FALSE	12	0.0217391	5.52356	5.0865	0.0223706
731	105	11	O	20	76	154	68	4.31	4.8	1	ralt	FALSE	1.06557	1	0.119714	FALSE	10.5069	-0.77118	1.63141	FALSE	FALSE	18	0.0212766	5.55459	5.08496	0.0219328
732	105	12	T	80	76	154	68	3.59	5.27	0	ralt	TRUE	2.42847	1	0.140286	FALSE	-6.99926	-15.6911	7.44325	FALSE	FALSE	30	0.0208333	5.58496	5.0841	0.0215117
733	105	13	A	20	75	124	89	4.1	4.74	1	ralt	FALSE	1.13949	1	0	FALSE	-1.36843	10.094	-12.3006	FALSE	FALSE	5	0.0204082	5.61471	5.08386	0.0211063
734	105	14	I	40	157	193	131	4.33	5.01	0	lalt	FALSE	0.754502	1	0.116286	FALSE	15.4176	-1.04351	10.9336	FALSE	FALSE	13	0.02	5.64386	5.08419	0.0207159
735	105	15	A	20	75	124	89	4.21	4.88	1	ralt	FALSE	1.33647	1	0.108286	FALSE	4.10927	15.5248	-4.36765	FALSE	FALSE	5	0.0392157	4.67243	5.07054	0.0156258
736	105	16	R	80	3	121	112	5.31	5.45	0	ralt	TRUE	0.827586	1	0.238857	FALSE	11.9573	-1.03118	-7.52582	FALSE	FALSE	27	0.0384615	4.70044	5.05792	0.0107271
737	105	17	O	20	0	168	107	3.78	5.21	0	lalt	FALSE	1.10533	1	0.254	FALSE	11.6424	10.6203	-11.5722	FALSE	FALSE	20	0.0188679	5.72792	5.06026	0.0150872
738	105	18	O	20	138	154	91	4.4	3.92	0	lalt	FALSE	1.14332	1	0.122	FALSE	-5.7813	-5.58998	11.0067	FALSE	FALSE	22	0.037037	4.75489	5.04927	0.0148314
739	105	19	A	20	138	154	91	3.95	5.11	0	lalt	FALSE	1.25137	1	0.008	FALSE	-8.1437	0.576688	21.7809	FALSE	FALSE	4	0.0181818	5.78136	5.05263	0.0145841
740	105	20	A	20	75	124	89	4.2	3.57	1	lalt	TRUE	0.944303	1	0.121143	FALSE	0.749693	-29.1127	6.90881	FALSE	FALSE	5	0.0535714	4.22239	5.03447	0.0126829
741	105	21	D	40	157	193	131	5.23	4.98	1	ralt	FALSE	1.40644	1	0.114571	FALSE	-9.17957	-10.1367	11.237	FALSE	FALSE	7	0.0175439	5.83289	5.03885	0.01248
742	105	22	I	40	0	168	107	4.85	4.33	1	ralt	FALSE	1.39231	1	0.106	FALSE	24.2603	13.575	-5.12713	FALSE	FALSE	14	0.0344828	4.85798	5.0307	0.0138891
743	105	23	O	20	76	154	68	4.3	3.96	1	ralt	FALSE	0.739308	1	0	FALSE	-2.22441	15.589	-9.27473	FALSE	FALSE	18	0.0338983	4.88264	5.02323	0.00958665
744	105	24	A	20	3	121	112	4.93	4.2	0	lalt	FALSE	1.26236	1	0	FALSE	-10.3282	4.05268	2.99865	FALSE	FALSE	3	0.0166667	5.90689	5.02878	0.0134612
745	105	25	A	20	75	124	89	4.37	5.22	1	lalt	TRUE	0.785416	1	0	FALSE	-10.0675	8.22627	-0.819674	FALSE	FALSE	5	0.0655738	3.93074	5.00856	0.0109143
746	105	26	D	40	76	154	68	4.57	5.16	0	ralt	TRUE	0.852336	1	0	FALSE	-3.35952	32.1255	4.20143	FALSE	FALSE	6	0.016129	5.9542	5.01491	0.0107533
747	105	27	O	20	138	154	91	4.86	5.49	0	ralt	TRUE	0.716227	1	0	FALSE	1.212	38.1803	-26.0231	FALSE	FALSE	22	0.047619	4.39232	5.00196	0.0113862
748	105	28	T	80	157	193	131	3.53	5.02	0	ralt	TRUE	0.959184	1	0	FALSE	-7.50876	10.0702	-2.38932	FALSE	FALSE	31	0.015625	6	5.00892	0.0112221
749	105	29	I	40	3	121	112	5.1	4.03	0	lalt	FALSE	0.789246	1	0	FALSE	-13.3588	-12.8926	17.5576	FALSE	FALSE	15	0.0153846	6.02237	5.016	0.0162119
750	105	30	O	20	76	154	68	4.11	4.27	1	lalt	TRUE	1.02322	1	0	FALSE	4.95755	13.9432	-21.5259	FALSE	FALSE	18	0.0454545	4.45943	5.00461	0.0109077
751	105	31	I	40	76	154	68	4.67	5.32	0	lalt	FALSE	0.930307	1	0	FALSE	25.9903	25.8816	-16.6915	FALSE	FALSE	12	0.0298507	5.06609	5.00108	0.00715242
752	105	32	I	40	0	168	107	4.46	3.82	1	lalt	TRUE	0.695249	1	0	FALSE	7.7605	-4.33531	12.7253	FALSE	FALSE	14	0.0441176	4.5025	4.99085	0.00705803
753	105	33	T	80	3	121	112	4.13	3.84	1	lalt	TRUE	0.527361	1	0	FALSE	-10.056	-24.1711	11.1778	FALSE	FALSE	33	0.0289855	5.10852	4.98822	0.00696607
754	105	34	A	20	0	168	107	5.03	4.36	0	ralt	TRUE	0.498479	1	0.104	FALSE	4.7746	0.878294	-3.10469	FALSE	FALSE	2	0.0142857	6.12928	4.99659	0.0116631
755	105	35	I	40	0	168	107	3.98	3.66	1	lalt	TRUE	0.929465	1	0	FALSE	4.60861	-17.9793	-7.4934	FALSE	FALSE	14	0.056338	4.14975	4.98265	0.00949191
756	105	36	I	40	157	193	131	3.88	4.56	0	lalt	FALSE	1.00258	1	0.114857	FALSE	14.0766	14.1799	-2.05802	FALSE	FALSE	13	0.0277778	5.16993	4.98107	0.00601198
757	105	37	D	40	157	193	131	4.83	5.29	1	lalt	TRUE	0.934548	1	0.0908571	FALSE	0.0863667	20.9524	-9.485	FALSE	FALSE	7	0.0273973	5.18982	4.97981	0.00790103
758	105	38	R	80	138	154	91	4.58	3.5	1	ralt	FALSE	0.938543	1	0.110857	FALSE	12.5902	29.947	-30.8124	FALSE	FALSE	28	0.027027	5.20945	4.97884	0.00780287
759	105	39	T	80	3	121	112	5.45	4.25	1	lalt	TRUE	0.753627	1	0	FALSE	-14.9795	-17.8732	29.763	FALSE	FALSE	33	0.04	4.64386	4.97169	0.00646056
760	105	40	R	80	157	193	131	5.32	3.76	0	ralt	TRUE	1.27756	1	0.107714	FALSE	-8.68568	-2.3969	2.46913	FALSE	FALSE	25	0.0131579	6.24793	4.98115	0.00956657
761	105	41	D	40	157	193	131	5.34	5.46	1	lalt	TRUE	1.48551	1	0	FALSE	-7.08213	-8.02106	-8.79738	FALSE	FALSE	7	0.038961	4.68182	4.97465	0.00945029
762	105	42	T	80	3	121	112	5.02	4.46	1	lalt	TRUE	0.736386	1	0.501714	TRUE	-10.4837	13.1591	-10.3285	FALSE	FALSE	33	0.0512821	4.2854	4.96393	0.00439555
763	105	43	A	20	76	154	68	4.35	5.26	0	lalt	FALSE	0.861376	1	0.118571	FALSE	4.36552	-6.49906	27.3689	FALSE	FALSE	0	0.0126582	6.30378	4.97382	0.00859463
764	105	44	T	80	3	121	112	3.94	3.71	1	lalt	TRUE	0.393366	1	0.115143	FALSE	14.0464	41.9826	-16.2793	FALSE	FALSE	33	0.0625	4	4.96024	0.00810613
765	105	45	O	20	76	154	68	4.17	5.29	1	lalt	TRUE	0.841498	1	0	FALSE	18.4149	4.04975	4.95429	FALSE	FALSE	18	0.0493827	4.33985	4.95074	0.00325227
766	105	46	O	20	76	154	68	4.45	4.52	1	lalt	TRUE	0.500417	1	0	FALSE	8.37954	6.47658	-5.54462	FALSE	FALSE	18	0.0609756	4.03562	4.93819	0.00709702
767	105	47	A	20	76	154	68	3.58	5.41	0	ralt	TRUE	1.0445	1	0	FALSE	0.864055	19.6217	-15.1219	FALSE	FALSE	0	0.0240964	5.37504	4.93978	0.00491427
768	105	48	T	80	75	124	89	5.37	4.9	0	lalt	FALSE	1.50547	1	0.106571	FALSE	-5.26832	-6.42711	17.6955	FALSE	FALSE	35	0.0238095	5.39232	4.94153	0.00693997
769	105	49	A	20	75	124	89	4.57	4.24	1	lalt	TRUE	0.968369	1	0.105429	FALSE	14.1244	9.61637	-5.64831	FALSE	FALSE	5	0.0588235	4.08746	4.93012	0.00480957
770	105	50	R	80	76	154	68	4.38	5.08	0	ralt	TRUE	0.605416	1	0.0917143	FALSE	10.3634	29.4062	-14.8751	FALSE	FALSE	24	0.0116279	6.42626	4.94101	0.00757625
771	105	51	O	20	0	168	107	4.77	4.33	0	ralt	TRUE	1.08537	1	0.106	FALSE	7.08342	15.8867	2.19986	FALSE	FALSE	20	0.0229885	5.44294	4.94326	0.00950231
772	105	52	D	40	76	154	68	4.58	4.85	0	lalt	FALSE	1.58326	1	0.123429	FALSE	-3.12277	-10.855	10.1992	FALSE	FALSE	6	0.0227273	5.45943	4.94564	0.00664574
773	105	53	I	40	0	168	107	3.86	4.23	1	lalt	TRUE	0.965284	1	0	FALSE	12.5611	-4.58999	-0.652693	FALSE	FALSE	14	0.0561798	4.15381	4.93543	0.0046129
774	105	54	R	80	138	154	91	3.86	3.89	1	lalt	TRUE	0.997363	1	0.243429	FALSE	13.1225	12.8616	1.29477	FALSE	FALSE	28	0.0333333	4.90689	4.93281	0.00352513
775	105	55	D	40	157	193	131	5	3.5	1	lalt	TRUE	1.83341	1	0	FALSE	1.96104	3.61613	-21.5021	FALSE	FALSE	7	0.043956	4.50779	4.92646	0.00383234
776	105	56	D	40	138	154	91	5.16	3.79	0	ralt	TRUE	1.37942	1	0.119714	FALSE	-2.01415	11.7971	14.4472	FALSE	FALSE	10	0.0108696	6.52356	4.93773	0.00744917
777	105	57	I	40	76	154	68	4.32	3.9	0	ralt	TRUE	1.29641	1	0	FALSE	21.6217	10.1945	-16.4702	FALSE	FALSE	12	0.0322581	4.9542	4.93567	0.00791087
778	105	58	A	20	75	124	89	4.98	4.46	1	lalt	TRUE	0.442513	1	0	FALSE	-2.75748	-15.9222	-28.9805	FALSE	FALSE	5	0.0638298	3.96963	4.92438	0.00316528
779	105	59	I	40	0	168	107	4.18	4.74	1	lalt	TRUE	1.03848	1	0	FALSE	6.69913	1.73384	-20.3325	FALSE	FALSE	14	0.0631579	3.98489	4.91349	0.00205858
780	105	60	R	80	138	154	91	5.17	3.59	1	ralt	FALSE	1.11541	2	0.115143	FALSE	-2.45145	-13.5425	35.4111	FALSE	FALSE	28	0.0416667	4.58496	4.90846	0.00258594
781	105	61	T	80	3	121	112	4.21	5.24	1	lalt	TRUE	0.564459	2	0.122	FALSE	-21.0596	-46.1939	19.7203	FALSE	FALSE	33	0.0618557	4.01495	4.89825	0.00256273
782	105	62	R	80	138	154	91	4.67	4.61	1	lalt	TRUE	1.27441	2	0	FALSE	9.56605	-21.1487	2.64302	FALSE	FALSE	28	0.0510204	4.29278	4.89084	0.00222242
783	105	63	I	40	0	168	107	3.6	4.15	1	lalt	TRUE	0.614423	2	0.143143	FALSE	24.7604	28.3407	-34.3056	FALSE	FALSE	14	0.0707071	3.822	4.87924	0.00204732
784	105	64	R	80	138	154	91	4.87	4.74	1	lalt	TRUE	0.43859	2	0	FALSE	8.65743	4.27083	5.4718	FALSE	FALSE	28	0.06	4.05889	4.87006	0.00181749
785	105	65	R	80	157	193	131	4.71	3.93	0	ralt	TRUE	2.29142	2	0	FALSE	3.1922	16.9217	-2.91309	FALSE	FALSE	25	0.019802	5.65821	4.8748	0.00389785
786	105	66	R	80	138	154	91	4.68	4.9	1	lalt	TRUE	0.811477	2	0	FALSE	-5.91851	6.30924	-5.9086	FALSE	FALSE	28	0.0686275	3.86507	4.86411	0.00371142
787	105	67	O	20	75	124	89	3.85	4.31	0	ralt	TRUE	1.21539	2	0.116286	FALSE	12.479	8.72635	5.90541	FALSE	FALSE	23	0.0194175	5.6865	4.86908	0.00367839
788	105	68	D	40	157	193	131	3.96	3.81	1	lalt	TRUE	0.527437	2	0	FALSE	4.93533	25.9222	-5.89715	FALSE	FALSE	7	0.0480769	4.37851	4.86318	0.00399876
789	105	69	A	20	0	168	107	4.3	5.21	0	ralt	TRUE	1.78256	2	0	FALSE	-20.9188	-20.8417	5.89074	FALSE	FALSE	2	0.0190476	5.71425	4.86833	0.00396355
790	105	70	A	20	138	154	91	4.64	5.26	0	ralt	TRUE	0.937496	2	0.114857	FALSE	1.97861	17.7813	-25.2943	FALSE	FALSE	4	0.0188679	5.72792	4.87351	0.00558017
791	105	71	D	40	157	193	131	3.92	3.73	1	lalt	TRUE	0.61437	2	0	FALSE	-9.73799	-8.33123	-7.8903	FALSE	FALSE	7	0.0560748	4.1565	4.86588	0.00369623
792	105	72	O	20	76	154	68	4.84	4.42	1	lalt	TRUE	0.830616	2	0	FALSE	-9.8768	-12.1514	23.4287	FALSE	FALSE	18	0.0555556	4.16993	4.85851	0.00184683
793	105	73	D	40	0	168	107	5.09	4.5	0	ralt	TRUE	0.329651	2	0	FALSE	-4.65171	-10.5817	12.2076	FALSE	FALSE	8	0.00917431	6.76818	4.87086	0.00586185
794	105	74	O	20	76	154	68	3.61	3.96	1	lalt	TRUE	0.447574	2	0	FALSE	3.82374	13.6722	-10.7368	FALSE	FALSE	18	0.0636364	3.974	4.86195	0.00567081
795	105	75	D	40	75	124	89	4.85	4.4	0	ralt	TRUE	0.43575	2	0	FALSE	13.2224	-1.03927	-4.15921	FALSE	FALSE	11	0.018018	5.79442	4.86755	0.00343379
796	105	76	I	40	0	168	107	3.75	5.11	1	lalt	TRUE	0.635826	2	0	FALSE	-0.597597	4.02759	-17.129	FALSE	FALSE	14	0.0714286	3.80735	4.85746	0.00330073
797	105	77	R	80	3	121	112	3.6	5.47	0	lalt	FALSE	1.84977	2	0.124286	FALSE	5.01356	6.22753	18.9778	FALSE	FALSE	27	0.0265487	5.23522	4.85892	0.00244276
798	105	78	A	20	3	121	112	5.29	5.42	0	ralt	TRUE	0.615902	2	0	FALSE	-3.8227	-2.42266	-8.40784	FALSE	FALSE	3	0.0175439	5.83289	4.86473	0.00438489
799	105	79	A	20	0	168	107	5.26	5.36	0	ralt	TRUE	0.841788	2	0	FALSE	-10.0712	8.32689	-7.11158	FALSE	FALSE	2	0.026087	5.26053	4.86632	0.004349
800	105	80	A	20	75	124	89	4.67	4.09	1	lalt	TRUE	1.05254	2	0	FALSE	-5.48822	-19.8448	4.99541	FALSE	FALSE	5	0.0603448	4.05063	4.85856	0.00248696
801	105	81	T	80	157	193	131	4.7	4.12	0	ralt	TRUE	0.44271	2	0	FALSE	-12.8618	-29.838	-0.898585	FALSE	FALSE	31	0.017094	5.87036	4.86454	0.00327056
802	105	82	I	40	0	168	107	4.84	4.51	1	lalt	TRUE	0.582652	2	0.285429	FALSE	21.1427	26.3938	-19.8904	FALSE	FALSE	14	0.0762712	3.71272	4.85426	0.00306728
803	105	83	A	20	138	154	91	4.97	3.54	0	ralt	TRUE	0.875725	2	0.106571	FALSE	13.1242	-6.96375	33.1685	FALSE	FALSE	4	0.0252101	5.30986	4.8563	0.00225396
804	105	84	D	40	3	121	112	5.4	5.32	0	ralt	TRUE	0.357814	2	0.120286	FALSE	-10.1983	-31.7011	16.9397	FALSE	FALSE	9	0.00833333	6.90689	4.86869	0.0062037
805	105	85	T	80	3	121	112	3.67	4.84	1	lalt	TRUE	0.301649	2	0	FALSE	-26.3694	-9.00087	9.44644	FALSE	FALSE	33	0.0578512	4.11151	4.86172	0.00517916
806	105	86	T	80	3	121	112	4.96	5.09	1	lalt	TRUE	0.655729	2	0	FALSE	-9.46182	-14.4855	3.3932	FALSE	FALSE	33	0.0655738	3.93074	4.8535	0.00287825
807	105	87	D	40	75	124	89	4.25	3.89	0	ralt	TRUE	0.606766	2	0	FALSE	2.60144	3.63068	-37.5393	FALSE	FALSE	11	0.0243902	5.35755	4.85586	0.0022626
808	105	88	I	40	3	121	112	5.09	4.51	0	ralt	TRUE	0.711828	2	0.101714	FALSE	-3.88308	-29.8563	3.26251	FALSE	FALSE	15	0.016129	5.9542	4.86219	0.00405052
809	105	89	I	40	75	124	89	4.27	4.28	0	ralt	TRUE	1.02582	2	0	FALSE	-11.9586	-7.96226	-17.8697	FALSE	FALSE	17	0.008	6.96578	4.87451	0.00671708
810	105	90	T	80	0	168	107	4.72	4.74	0	missing	FALSE		2	0.086	FALSE	3.89156	-5.66948	22.4485	TRUE	TRUE	32	0.00793651	6.97728	4.88672	0.00859566
811	105	91	O	20	76	154	68	4.18	5.03	1	ralt	FALSE	1.61964	2	0.126571	FALSE	-7.01488	-24.9729	14.2722	FALSE	FALSE	18	0.0629921	3.98868	4.87908	0.00485278
812	105	92	R	80	138	154	91	5.01	3.9	1	lalt	TRUE	0.992529	2	0	FALSE	-27.0779	-22.8015	20.5244	FALSE	FALSE	28	0.0625	4	4.87163	0.0011679
813	105	93	I	40	76	154	68	3.9	4.07	0	lalt	FALSE	0.891543	2	0	FALSE	14.8937	19.0937	-3.06182	FALSE	FALSE	12	0.0310078	5.01123	4.87147	0.00177808
814	105	94	I	40	138	154	91	4.81	3.7	0	ralt	TRUE	0.435791	2	0	FALSE	16.7489	10.9551	11.9833	FALSE	FALSE	16	0.00769231	7.02237	4.88367	0.00535876
815	105	95	O	20	76	154	68	4.25	3.61	1	lalt	TRUE	0.923736	2	0	FALSE	3.67715	21.1154	-44.605	FALSE	FALSE	18	0.0687023	3.8635	4.8754	0.00464059
816	105	96	T	80	3	121	112	5.41	3.68	1	lalt	TRUE	0.200853	2	0.127143	FALSE	-5.22247	0.316016	-28.2662	FALSE	FALSE	33	0.0681818	3.87447	4.86733	0.000998174
817	105	97	D	40	138	154	91	5.12	4.08	0	ralt	TRUE	0.92399	2	0	FALSE	0.287758	-10.1083	-6.37808	FALSE	FALSE	10	0.0150376	6.05528	4.87391	0.00274462
818	105	98	R	80	138	154	91	4.73	4.37	1	lalt	TRUE	1.31686	2	0	FALSE	-12.2649	-40.5914	23.7172	FALSE	FALSE	28	0.0671642	3.89616	4.86613	0.00272549
819	105	99	I	40	75	124	89	5.22	4.86	0	lalt	FALSE	0.662884	2	0	FALSE	9.66171	8.57781	18.7084	FALSE	FALSE	17	0.0148148	6.07682	4.87278	0.00270663
820	105	100	A	20	75	124	89	4.35	4.75	1	lalt	TRUE	0.555829	2	0	FALSE	13.6948	21.993	-21.9633	FALSE	FALSE	5	0.0588235	4.08746	4.86645	0.00275587
821	105	101	T	80	3	121	112	4.86	4.55	1	lalt	TRUE	0.27587	2	0	FALSE	3.56998	22.0153	17.136	FALSE	FALSE	33	0.0729927	3.7761	4.85808	0.000980876
822	105	102	R	80	0	168	107	4.9	5.19	0	ralt	TRUE	0.843972	2	0	FALSE	7.88489	34.6411	-23.0044	FALSE	FALSE	26	0.00724638	7.10852	4.8703	0.00436107
823	105	103	D	40	0	168	107	4.54	3.98	0	ralt	TRUE	0.743905	2	0	FALSE	-12.6206	5.20149	-5.3701	FALSE	FALSE	8	0.0143885	6.11894	4.87703	0.00606206
824	105	104	A	20	75	124	89	5.12	3.52	1	lalt	TRUE	0.383874	2	0	FALSE	-8.85048	-22.7973	19.0031	FALSE	FALSE	5	0.0642857	3.95936	4.87001	0.00261609
825	105	105	D	40	3	121	112	4.04	4.95	0	ralt	TRUE	0.310004	2	0	FALSE	-10.6715	26.5617	-14.8233	FALSE	FALSE	9	0.0141844	6.13955	4.87679	0.0025987
826	105	106	D	40	76	154	68	4.88	4.42	0	ralt	TRUE	0.93603	2	0	FALSE	-9.47358	-8.14971	23.7237	FALSE	FALSE	6	0.0211268	5.56478	4.88011	0.0035614
827	105	107	D	40	157	193	131	5.1	3.57	1	lalt	TRUE	0.600985	2	0	FALSE	9.14971	7.46536	-1.90143	FALSE	FALSE	7	0.048951	4.35252	4.8758	0.00205344
828	105	108	T	80	138	154	91	4.92	4.65	0	ralt	TRUE	0.465124	2	0	FALSE	-2.36014	-8.21957	-13.4318	FALSE	FALSE	34	0.00694444	7.16993	4.88781	0.00438404
829	105	109	I	40	138	154	91	5.27	4.04	0	ralt	TRUE	0.469109	2	0.0988571	FALSE	-14.6978	12.8335	14.4474	FALSE	FALSE	16	0.0137931	6.17991	4.89456	0.00581885
830	105	110	D	40	157	193	131	3.95	3.93	1	lalt	TRUE	0.59303	2	0	FALSE	-32.0689	-43.8261	23.2507	FALSE	FALSE	7	0.0547945	4.18982	4.88921	0.00257833
831	105	111	I	40	0	168	107	3.98	4.5	1	lalt	TRUE	0.545211	2	0	FALSE	20.046	18.0291	-25.1936	FALSE	FALSE	14	0.0680272	3.87774	4.88193	0.000924327
832	105	112	R	80	75	124	89	4.04	4.64	0	ralt	TRUE	0.590391	2	0	FALSE	3.26948	-21.5233	-4.23335	FALSE	FALSE	29	0.00675676	7.20945	4.89385	0.00407791
833	105	113	O	20	76	154	68	3.96	4.68	1	missing	FALSE		2	0	FALSE	8.83475	12.3451	29.3933	TRUE	TRUE	18	0.0671141	3.89724	4.88677	0.0040516
834	105	114	A	20	76	154	68	3.62	3.72	0	lalt	FALSE	1.02622	2	0.116286	FALSE	14.7761	-8.50554	6.62603	FALSE	FALSE	0	0.02	5.64386	4.89038	0.00177496
835	105	115	O	20	157	193	131	5.02	4.2	0	ralt	TRUE	1.06146	2	0.103429	FALSE	16.6423	-28.5931	17.3099	FALSE	FALSE	19	0.00662252	7.2384	4.90219	0.00497111
836	105	116	A	20	75	124	89	5.02	3.69	1	lalt	TRUE	0.612371	2	0.137143	FALSE	-0.86141	-18.1122	9.17534	FALSE	FALSE	5	0.0657895	3.926	4.89538	0.00397467
837	105	117	D	40	3	121	112	4.94	3.51	0	ralt	TRUE	0.827511	2	0	FALSE	10.9031	7.60344	-22.2875	FALSE	FALSE	9	0.0196078	5.67243	4.89905	0.00174285
838	105	118	R	80	138	154	91	4.46	4.17	1	ralt	FALSE	0.742586	2	0	FALSE	6.32296	1.49756	-10.2717	FALSE	FALSE	28	0.0649351	3.94486	4.89247	0.0017324
839	105	119	O	20	0	168	107	4.28	3.94	0	ralt	TRUE	0.721608	2	0	FALSE	4.73912	27.8764	-37.5854	FALSE	FALSE	20	0.0193548	5.69116	4.89623	0.00172207
840	105	120	A	20	75	124	89	5.22	4.6	1	lalt	TRUE	0.494295	3	0	FALSE	23.448	31.048	-12.7015	FALSE	FALSE	5	0.0705128	3.82597	4.88903	0.00167258
841	105	121	T	80	3	121	112	5.38	3.7	1	lalt	TRUE	0.241203	3	0	FALSE	16.1629	-6.31633	5.06736	FALSE	FALSE	33	0.0700637	3.83519	4.88199	0.000689453
842	105	122	I	40	75	124	89	5.1	4.12	0	ralt	TRUE	1.11033	3	0	FALSE	3.12064	-6.68397	-8.59438	FALSE	FALSE	17	0.0189873	5.71882	4.88591	0.00165302
843	105	123	I	40	157	193	131	4.62	4.11	0	ralt	TRUE	0.85136	3	0	FALSE	22.0815	2.07523	-0.228098	FALSE	FALSE	13	0.0188679	5.72792	4.88984	0.00260453
844	105	124	R	80	138	154	91	5.16	5.22	1	ralt	FALSE	0.647382	3	0	FALSE	6.57485	-7.66977	-19.5777	FALSE	FALSE	28	0.06875	3.8625	4.8831	0.00163391
845	105	125	R	80	138	154	91	4.42	4.46	1	lalt	TRUE	0.780197	3	0	FALSE	-13.2685	-38.3122	-2.47068	FALSE	FALSE	28	0.0745342	3.74595	4.87574	0.00141825
846	105	126	I	40	0	168	107	4.02	4.31	1	lalt	TRUE	0.247274	3	0	FALSE	-22.1076	-16.1367	2.72177	FALSE	FALSE	14	0.0679012	3.88042	4.86927	0.000640101
847	105	127	O	20	76	154	68	4.56	4.87	1	lalt	TRUE	0.459384	3	0	FALSE	0.0701351	-16.4273	21.4552	FALSE	FALSE	18	0.0674847	3.8893	4.86294	0.000668371
848	105	128	I	40	0	168	107	5.41	3.71	1	lalt	TRUE	0.517355	3	0	FALSE	11.719	25.1511	8.34852	FALSE	FALSE	14	0.0731707	3.77259	4.856	0.000633664
849	105	129	R	80	138	154	91	5.2	5.4	1	lalt	TRUE	0.702407	3	0	FALSE	7.75768	-0.380869	8.94179	FALSE	FALSE	28	0.0787879	3.66588	4.84853	0.000572915
850	105	130	A	20	75	124	89	5.19	4.44	1	lalt	TRUE	1.24924	3	0	FALSE	5.17447	-26.9454	-0.677678	FALSE	FALSE	5	0.0722892	3.79008	4.84187	0.000570117
851	105	131	R	80	76	154	68	5.38	4.78	0	ralt	TRUE	0.672338	3	0	FALSE	3.37868	3.18932	-1.19474	FALSE	FALSE	24	0.011976	6.3837	4.84921	0.0021035
852	105	132	T	80	3	121	112	4.62	4.14	1	lalt	TRUE	0.505168	3	0	FALSE	-8.65507	-7.00489	8.60495	FALSE	FALSE	33	0.0714286	3.80735	4.84273	0.00209167
853	105	133	R	80	138	154	91	4.13	5.14	1	lalt	TRUE	0.477222	3	0	FALSE	10.7486	20.1815	0.761733	FALSE	FALSE	28	0.0828402	3.59352	4.83511	0.000539657
854	105	134	D	40	157	193	131	4.76	3.54	1	lalt	TRUE	0.709224	3	0.130857	FALSE	-10.5383	4.02451	-12.4969	FALSE	FALSE	7	0.0529412	4.23947	4.8312	0.000647191
855	105	135	T	80	3	121	112	4.63	5.17	1	lalt	TRUE	0.147356	3	0	FALSE	12.8408	0.416787	13.3173	FALSE	FALSE	33	0.0760234	3.71741	4.82443	0.000665971
856	105	136	A	20	76	154	68	3.53	5.24	0	ralt	TRUE	0.284479	3	0	FALSE	-19.8394	-18.5966	-1.38223	FALSE	FALSE	0	0.0232558	5.42626	4.82697	0.00118066
857	105	137	T	80	0	168	107	4.9	4.43	0	ralt	TRUE	0.364526	3	0	FALSE	9.99858	-5.49121	-11.1901	FALSE	FALSE	32	0.0115607	6.43463	4.83444	0.00265763
858	105	138	O	20	76	154	68	3.82	4.7	1	lalt	TRUE	0.662364	3	0	FALSE	-8.37787	12.822	17.1135	FALSE	FALSE	18	0.0689655	3.85798	4.82855	0.00202335
859	105	139	O	20	3	121	112	4.13	5.21	0	ralt	TRUE	0.838595	3	0	FALSE	12.9971	-5.46988	3.81993	FALSE	FALSE	21	0.0114286	6.45121	4.83602	0.0020124
860	105	140	I	40	3	121	112	3.92	4.53	0	ralt	TRUE	0.682596	3	0	FALSE	20.9712	5.24908	1.48424	FALSE	FALSE	15	0.0170455	5.87447	4.84068	0.00289956
861	105	141	R	80	138	154	91	4.61	3.52	1	lalt	TRUE	0.723553	3	0	FALSE	5.33061	33.2561	-8.73039	FALSE	FALSE	28	0.0847458	3.56071	4.83325	0.00139426
862	105	142	O	20	76	154	68	5.18	5.05	1	lalt	TRUE	0.672669	3	0	FALSE	7.08999	-2.88871	-8.08859	FALSE	FALSE	18	0.0730337	3.77529	4.82706	0.000474484
863	105	143	T	80	3	121	112	3.82	4.26	1	lalt	TRUE	0.258618	3	0	FALSE	-9.56418	10.872	-5.30706	FALSE	FALSE	33	0.0782123	3.67646	4.82041	0.000490601
864	105	144	R	80	138	154	91	3.87	4.47	1	lalt	TRUE	0.291753	3	0	FALSE	11.2096	2.37967	-8.869	FALSE	FALSE	28	0.0888889	3.49185	4.81285	0.000433445
865	105	145	O	20	157	193	131	3.54	5.13	0	ralt	TRUE	0.649948	3	0	FALSE	1.83095	25.9541	-4.9843	FALSE	FALSE	19	0.0110497	6.49985	4.82042	0.0018703
866	105	146	I	40	0	168	107	3.57	4.68	1	lalt	TRUE	0.54989	3	0	FALSE	-6.79324	7.34509	21.1994	FALSE	FALSE	14	0.0714286	3.80735	4.81461	0.0019149
867	105	147	A	20	75	124	89	4.2	5.26	1	lalt	TRUE	0.445013	3	0	FALSE	16.7472	9.2674	9.99913	FALSE	FALSE	5	0.0710383	3.81526	4.80891	0.000502389
868	105	148	T	80	75	124	89	4.51	3.63	0	lalt	FALSE	0.23597	3	0	FALSE	-22.6985	-27.138	11.5428	FALSE	FALSE	35	0.0163043	5.9386	4.81386	0.00138304
869	105	149	O	20	157	193	131	3.55	5.22	0	ralt	TRUE	0.540238	3	0	FALSE	3.27751	23.8243	-25.3027	FALSE	FALSE	19	0.0162162	5.94642	4.8188	0.00225422
870	105	150	T	80	76	154	68	3.59	4.82	0	ralt	TRUE	0.982262	3	0	FALSE	-12.4081	-2.3969	-11.0736	FALSE	FALSE	30	0.0107527	6.53916	4.82635	0.00274923
871	105	151	A	20	3	121	112	4.97	3.91	0	ralt	TRUE	0.629377	3	0	FALSE	22.1022	17.5096	3.87108	FALSE	FALSE	3	0.0160428	5.96193	4.83126	0.00273505
872	105	152	D	40	0	168	107	4.05	4.61	0	ralt	TRUE	1.23935	3	0	FALSE	-10.7536	3.68282	-27.2324	FALSE	FALSE	8	0.0159574	5.96963	4.83615	0.00221976
873	105	153	A	20	157	193	131	4.7	5.27	0	ralt	TRUE	0.325439	3	0	FALSE	36.3049	60.7238	-17.255	FALSE	FALSE	1	0.010582	6.56224	4.84361	0.00270712
874	105	154	D	40	76	154	68	3.64	4.77	0	ralt	TRUE	0.616383	3	0	FALSE	13.0127	8.66934	28.8269	FALSE	FALSE	6	0.0210526	5.56986	4.84656	0.00242893
875	105	155	D	40	157	193	131	4.85	4.18	1	lalt	TRUE	0.262392	3	0	FALSE	-16.7791	-9.15174	32.212	FALSE	FALSE	7	0.052356	4.2555	4.84314	0.00115446
876	105	156	R	80	138	154	91	4.44	4.26	1	lalt	TRUE	0.6814	3	0	FALSE	24.9468	37.4911	-36.6665	FALSE	FALSE	28	0.0885417	3.4975	4.83597	0.000499551
877	105	157	A	20	75	124	89	4.77	5.18	1	lalt	TRUE	0.317504	3	0	FALSE	-0.638093	-9.49576	-10.4031	FALSE	FALSE	5	0.0725389	3.7851	4.83031	0.000396844
878	105	158	O	20	76	154	68	5.46	4.23	1	lalt	TRUE	0.625416	3	0.224	FALSE	3.81973	-20.428	-3.80314	FALSE	FALSE	18	0.0721649	3.79256	4.82475	0.000439904
879	105	159	A	20	0	168	107	4.55	4.92	0	ralt	TRUE	0.494551	3	0.117143	FALSE	7.87344	-2.48511	7.42515	FALSE	FALSE	2	0.0205128	5.60733	4.82791	0.00103298
880	105	160	A	20	157	193	131	3.93	3.59	0	ralt	TRUE	0.9785	3	0.132286	FALSE	25.2112	38.7018	-14.6115	FALSE	FALSE	1	0.0153061	6.02975	4.83292	0.00187642
881	105	161	I	40	75	124	89	5.2	4.27	0	ralt	TRUE	0.516679	3	0.122	FALSE	-17.4899	-14.4452	6.93051	FALSE	FALSE	17	0.0203046	5.62205	4.83609	0.00186732
882	105	162	R	80	0	168	107	4.72	5.27	0	ralt	TRUE	0.307676	3	0.132857	FALSE	-7.73102	-28.8626	16.1062	FALSE	FALSE	26	0.010101	6.62936	4.84355	0.00233437
883	105	163	I	40	0	168	107	4.32	5.43	1	lalt	TRUE	0.526703	3	0	FALSE	13.8177	29.7723	13.7336	FALSE	FALSE	14	0.0703518	3.82927	4.83824	0.00174004
884	105	164	T	80	0	168	107	3.78	4.61	0	ralt	TRUE	0.406634	3	0.123714	FALSE	-15.4534	0.108821	-14.5542	FALSE	FALSE	32	0.015	6.05889	4.84325	0.00126042
885	105	165	I	40	0	168	107	4.87	3.79	1	lalt	TRUE	0.484627	3	0	FALSE	-13.2933	-36.8492	30.9387	FALSE	FALSE	14	0.0746269	3.74416	4.83759	0.00123827
886	105	166	R	80	75	124	89	4.03	5.01	0	ralt	TRUE	0.286823	3	0.114857	FALSE	3.21601	18.2661	-9.67724	FALSE	FALSE	29	0.00990099	6.65821	4.84504	0.00169921
887	105	167	D	40	157	193	131	4.83	5.25	1	lalt	TRUE	0.406764	3	0.122857	FALSE	1.63933	-11.7971	11.3926	FALSE	FALSE	7	0.0541872	4.2059	4.84161	0.0017727
888	105	168	O	20	157	193	131	4.32	5.15	0	ralt	TRUE	0.437825	3	0	FALSE	13.8694	34.3189	-6.35065	FALSE	FALSE	19	0.0196078	5.67243	4.84487	0.00105587
889	105	169	O	20	0	168	107	4.14	4.8	0	ralt	TRUE	0.740823	3	0	FALSE	0.384891	-21.8346	14.4176	FALSE	FALSE	20	0.0195122	5.67948	4.84813	0.00155239
890	105	170	D	40	157	193	131	4.93	5.36	1	lalt	TRUE	0.714723	3	0	FALSE	22.9716	40.155	-14.6024	FALSE	FALSE	7	0.0582524	4.10154	4.84426	0.00102138
891	105	171	T	80	76	154	68	4.92	3.73	0	ralt	TRUE	0.293736	3	0.117143	FALSE	10.989	17.6809	-8.71153	FALSE	FALSE	30	0.0144928	6.10852	4.84931	0.00125963
892	105	172	O	20	76	154	68	4.41	4.71	1	lalt	TRUE	0.469761	3	0.148	FALSE	24.0378	18.7152	0.193867	FALSE	FALSE	18	0.0721154	3.79355	4.84405	0.00119912
893	105	173	O	20	76	154	68	4.55	3.53	1	lalt	TRUE	0.308792	3	0.133429	FALSE	-7.7029	0.477926	5.70707	FALSE	FALSE	18	0.076555	3.70736	4.83844	0.000811954
894	105	174	O	20	138	154	91	3.81	4.12	0	ralt	TRUE	0.748992	3	0.133714	FALSE	13.3151	10.613	-11.2818	FALSE	FALSE	22	0.0190476	5.71425	4.84181	0.00093534
895	105	175	I	40	0	168	107	5.24	4.66	1	lalt	TRUE	0.324032	3	0	FALSE	17.7674	-13.2629	8.18892	FALSE	FALSE	14	0.0758294	3.7211	4.83634	0.000931237
896	105	176	O	20	76	154	68	4.04	4.5	1	lalt	TRUE	0.322025	3	0	FALSE	23.5722	10.4625	0.197989	FALSE	FALSE	18	0.0801887	3.64046	4.83054	0.000338804
897	105	177	R	80	138	154	91	4.58	4.56	1	lalt	TRUE	0.813071	3	0	FALSE	24.0382	14.6521	-8.099	FALSE	FALSE	28	0.084507	3.56478	4.82446	0.000314994
898	105	178	I	40	0	168	107	4.8	4.92	1	lalt	TRUE	0.506088	3	0	FALSE	-13.98	15.3745	-25.4298	FALSE	FALSE	14	0.0794393	3.654	4.81884	0.000313825
899	105	179	D	40	157	193	131	4.44	3.94	1	lalt	TRUE	0.23917	3	0.135143	FALSE	-13.6695	22.5326	-40.4584	FALSE	FALSE	7	0.0604651	4.04775	4.81503	0.00038102
900	105	180	O	20	76	154	68	4.46	4.95	1	lalt	TRUE	0.655056	4	0	FALSE	5.04815	21.3991	18.7035	FALSE	FALSE	18	0.0833333	3.58496	4.8092	0.000369085
901	105	181	T	80	75	124	89	5.23	4.68	0	ralt	TRUE	0.543134	4	0	FALSE	4.07435	-11.3935	7.55151	FALSE	FALSE	35	0.0184332	5.76155	4.81282	0.000885233
902	105	182	I	40	157	193	131	4.55	5.05	0	ralt	TRUE	0.339153	4	0	FALSE	14.0247	34.6161	-8.7676	FALSE	FALSE	13	0.0183486	5.76818	4.81643	0.00146409
903	105	183	A	20	75	124	89	4.73	4.9	1	lalt	TRUE	0.292046	4	0.138286	FALSE	7.81285	9.68813	-8.70249	FALSE	FALSE	5	0.0684932	3.8679	4.81192	0.000912752
904	105	184	D	40	157	193	131	3.88	3.6	1	lalt	TRUE	0.262057	4	0	FALSE	-4.52844	12.4152	-8.30345	FALSE	FALSE	7	0.0636364	3.974	4.80792	0.000381268
905	105	185	D	40	157	193	131	5.19	4.22	1	lalt	TRUE	0.279254	4	0	FALSE	9.24149	8.94329	-1.26789	FALSE	FALSE	7	0.0678733	3.88101	4.80354	0.000828177
906	105	186	A	20	75	124	89	4.34	3.76	1	lalt	TRUE	0.302265	4	0	FALSE	8.59493	-7.21113	-1.41213	FALSE	FALSE	5	0.0720721	3.79442	4.79883	0.000350726
907	105	187	D	40	157	193	131	3.62	5.11	1	lalt	TRUE	0.517289	4	0	FALSE	17.2961	38.8188	-18.2027	FALSE	FALSE	7	0.0717489	3.8009	4.7942	0.000336554
908	105	188	O	20	3	121	112	3.86	4.21	0	ralt	TRUE	0.412551	4	0	FALSE	-3.15531	14.8737	-0.390632	FALSE	FALSE	21	0.0133929	6.22239	4.79959	0.00110546
909	105	189	T	80	3	121	112	3.83	4.85	1	lalt	TRUE	0.192527	4	0	FALSE	-3.13869	28.801	-9.10887	FALSE	FALSE	33	0.0666667	3.90689	4.79545	0.00111357
910	105	190	T	80	76	154	68	4.07	5.27	0	ralt	TRUE	0.360894	4	0	FALSE	6.09701	4.49492	11.2066	FALSE	FALSE	30	0.0176991	5.82018	4.79924	0.000886409
911	105	191	R	80	75	124	89	3.8	4.2	0	ralt	TRUE	0.935761	4	0.113143	FALSE	5.13837	-19.3752	0.879601	FALSE	FALSE	29	0.0132159	6.24159	4.80463	0.00163013
912	105	192	T	80	3	121	112	3.52	4	1	lalt	TRUE	1.06873	4	0	FALSE	9.02937	29.5828	-14.7307	FALSE	FALSE	33	0.0701754	3.83289	4.8002	0.00108714
913	105	193	O	20	75	124	89	4.93	4.94	0	ralt	TRUE	0.783986	4	0.123714	FALSE	-10.8978	-4.24245	-11.588	FALSE	FALSE	23	0.0131004	6.25424	4.80559	0.00108265
914	105	194	T	80	0	168	107	3.51	3.52	0	ralt	TRUE	0.35996	4	0.0914286	FALSE	9.64987	6.13331	0.601246	FALSE	FALSE	32	0.0173913	5.84549	4.80939	0.00160968
915	105	195	A	20	75	124	89	3.58	4.13	1	lalt	TRUE	0.28409	4	0	FALSE	-0.445792	-26.7617	25.4217	FALSE	FALSE	5	0.0735931	3.76429	4.80472	0.000845088
916	105	196	D	40	138	154	91	4.32	4.22	0	ralt	TRUE	0.61834	4	0	FALSE	-1.19715	22.2322	-6.88986	FALSE	FALSE	10	0.012931	6.27302	4.8101	0.00105847
917	105	197	R	80	157	193	131	4.66	4.28	0	ralt	TRUE	1.06638	4	0	FALSE	2.79662	20.49	-2.59486	FALSE	FALSE	25	0.0128755	6.27922	4.81546	0.00180559
918	105	198	O	20	76	154	68	4.44	4.47	1	lalt	TRUE	0.624272	4	0	FALSE	22.65	24.7328	-2.69225	FALSE	FALSE	18	0.0811966	3.62244	4.81024	0.00103159
919	105	199	A	20	3	121	112	5.27	3.84	0	ralt	TRUE	0.305468	4	0	FALSE	12.4336	15.2991	-3.18036	FALSE	FALSE	3	0.0170213	5.87652	4.81406	0.000813416
920	105	200	R	80	0	168	107	5.33	3.7	0	ralt	TRUE	0.880484	4	0	FALSE	18.3782	-0.407961	4.72535	FALSE	FALSE	26	0.0127119	6.29768	4.81942	0.00157028
921	105	201	D	40	75	124	89	5.03	5.46	0	ralt	TRUE	1.05447	4	0.0994286	FALSE	17.7118	30.9672	-17.7885	FALSE	FALSE	11	0.0168776	5.88874	4.82322	0.0015639
922	105	202	I	40	0	168	107	4.45	3.92	1	lalt	TRUE	1.01424	4	0	FALSE	-6.95612	15.1937	-12.2475	FALSE	FALSE	14	0.0756303	3.72489	4.81847	0.000812375
923	105	203	R	80	3	121	112	4.32	4.29	0	ralt	TRUE	0.674434	4	0	FALSE	19.0916	31.6537	-18.4742	FALSE	FALSE	27	0.0167364	5.90087	4.8223	0.000809202
924	105	204	T	80	157	193	131	3.86	4.74	0	ralt	TRUE	0.541477	4	0	FALSE	-32.7115	1.12903	24.4443	FALSE	FALSE	31	0.0125	6.32193	4.82763	0.00154507
925	105	205	O	20	75	124	89	4.48	5.26	0	ralt	TRUE	0.538563	4	0	FALSE	17.2527	20.8833	-3.31193	FALSE	FALSE	23	0.0165975	5.91289	4.83144	0.00153889
926	105	206	R	80	76	154	68	4.62	5.49	0	ralt	TRUE	0.729419	4	0	FALSE	0.884247	29.1189	5.12694	FALSE	FALSE	24	0.0123967	6.3339	4.83674	0.00153276
927	105	207	R	80	138	154	91	4.05	4.69	1	lalt	TRUE	0.549298	4	0	FALSE	17.2876	15.2793	-24.8936	FALSE	FALSE	28	0.0781893	3.67688	4.83185	0.000995415
928	105	208	R	80	138	154	91	4.45	3.64	1	lalt	TRUE	0.313428	4	0	FALSE	-8.93214	8.82592	17.6489	FALSE	FALSE	28	0.0819672	3.60881	4.82672	0.000550843
929	105	209	R	80	0	168	107	3.99	3.62	0	ralt	TRUE	0.504679	4	0	FALSE	-2.70169	17.879	-13.1866	FALSE	FALSE	26	0.0163265	5.93664	4.83057	0.000774931
930	105	210	T	80	157	193	131	5.23	4.25	0	ralt	TRUE	0.322701	4	0.131429	FALSE	13.621	14.8009	-21.4313	FALSE	FALSE	31	0.0162602	5.94251	4.83441	0.00130423
931	105	211	R	80	75	124	89	3.57	4.55	0	ralt	TRUE	0.500831	4	0	FALSE	7.2946	27.4376	-4.53013	FALSE	FALSE	29	0.0161943	5.94837	4.83824	0.00129917
932	105	212	T	80	138	154	91	4.8	4.2	0	ralt	TRUE	0.279974	4	0	FALSE	-15.1139	-35.0942	23.2556	FALSE	FALSE	34	0.00806452	6.9542	4.84549	0.00187746
933	105	213	T	80	3	121	112	4.71	5.38	1	lalt	TRUE	0.330923	4	0	FALSE	-12.4947	4.34198	6.23675	FALSE	FALSE	33	0.0682731	3.87254	4.84144	0.00136885
934	105	214	D	40	0	168	107	4.39	3.6	0	ralt	TRUE	0.391958	4	0	FALSE	-11.1243	13.0282	-4.2428	FALSE	FALSE	8	0.016	5.96578	4.84527	0.000784909
935	105	215	I	40	0	168	107	4.83	3.65	1	lalt	TRUE	0.408025	4	0.247143	FALSE	5.14745	-7.13471	-24.7553	FALSE	FALSE	14	0.0756972	3.72362	4.84068	0.000764885
936	105	216	I	40	138	154	91	5.2	3.94	0	ralt	TRUE	0.527212	4	0.126286	FALSE	8.10235	-12.7457	0.222997	FALSE	FALSE	16	0.0119048	6.39232	4.84597	0.000961685
937	105	217	A	20	157	193	131	4.75	4.65	0	ralt	TRUE	0.491242	4	0	FALSE	6.97672	10.7314	-3.30635	FALSE	FALSE	1	0.0158103	5.98299	4.8498	0.00146843
938	105	218	A	20	138	154	91	4.39	3.77	0	ralt	TRUE	0.395259	4	0.120286	FALSE	4.08952	11.2813	8.39947	FALSE	FALSE	4	0.015748	5.98868	4.85362	0.00126477
939	105	219	T	80	138	154	91	4.57	5.23	0	ralt	TRUE	0.379377	4	0	FALSE	5.00589	6.28047	17.0776	FALSE	FALSE	34	0.0117647	6.40939	4.85886	0.00145731
940	105	220	D	40	3	121	112	4.12	4.82	0	ralt	TRUE	0.350373	4	0	FALSE	17.7426	21.9556	-1.25101	FALSE	FALSE	9	0.015625	6	4.86266	0.00145181
941	105	221	T	80	138	154	91	5.1	5.25	0	ralt	TRUE	0.345422	4	0	FALSE	-10.3202	-5.55028	3.01822	FALSE	FALSE	34	0.0155642	6.00562	4.86645	0.00125058
942	105	222	D	40	157	193	131	4.7	5.42	1	lalt	TRUE	0.795229	4	0	FALSE	-6.52081	6.18043	-11.8142	FALSE	FALSE	7	0.0658915	3.92376	4.86267	0.000762051
943	105	223	D	40	157	193	131	5	4.45	1	lalt	TRUE	0.373186	4	0	FALSE	13.9632	30.522	0.0316419	FALSE	FALSE	7	0.0694981	3.84688	4.85862	0.000585707
944	105	224	D	40	157	193	131	4.13	4.25	1	lalt	TRUE	0.58819	4	0.113429	FALSE	10.5573	-5.01939	-19.2262	FALSE	FALSE	7	0.0730769	3.77444	4.85433	0.000550038
945	105	225	A	20	75	124	89	3.84	5.43	1	lalt	TRUE	0.655269	4	0	FALSE	-0.418783	-0.40671	27.2526	FALSE	FALSE	5	0.0689655	3.85798	4.85039	0.000250382
946	105	226	O	20	76	154	68	4.14	5.39	1	lalt	TRUE	0.544279	4	0	FALSE	13.2894	20.2553	-10.3007	FALSE	FALSE	18	0.0763359	3.71149	4.84593	0.00024261
947	105	227	T	80	3	121	112	4.52	4.9	1	lalt	TRUE	0.432286	4	0.124286	FALSE	-7.35318	3.62465	-2.90323	FALSE	FALSE	33	0.0684411	3.86899	4.84209	0.00024185
948	105	228	I	40	138	154	91	3.62	4.72	0	lalt	FALSE	0.661265	4	0	FALSE	15.8341	5.17015	-18.2913	FALSE	FALSE	16	0.0151515	6.04439	4.84601	0.000737188
949	105	229	D	40	157	193	131	5.14	4.91	1	lalt	TRUE	0.519378	4	0	FALSE	1.45065	7.85141	-4.60787	FALSE	FALSE	7	0.0754717	3.72792	4.84169	0.000720016
950	105	230	T	80	3	121	112	4.73	4.02	1	lalt	TRUE	0.219344	4	0.148571	FALSE	-7.06202	-13.9565	-15.9774	FALSE	FALSE	33	0.0714286	3.80735	4.83768	0.000231972
951	105	231	D	40	138	154	91	3.66	5.18	0	ralt	TRUE	0.794492	4	0	FALSE	5.4465	11.0148	-10.6632	FALSE	FALSE	10	0.0149813	6.0607	4.84163	0.000721798
952	105	232	A	20	75	124	89	4.68	4.6	1	lalt	TRUE	0.948403	4	0	FALSE	7.76623	1.15957	15.707	FALSE	FALSE	5	0.0708955	3.81816	4.8377	0.000719265
953	105	233	A	20	75	124	89	5.25	4.56	1	lalt	TRUE	0.216467	4	0	FALSE	12.6921	27.4899	-9.42482	FALSE	FALSE	5	0.0743494	3.74953	4.83355	0.00050392
954	105	234	O	20	3	121	112	4.93	5.34	0	ralt	TRUE	0.554522	4	0	FALSE	-13.6794	-11.2038	-3.13067	FALSE	FALSE	21	0.0148148	6.07682	4.83753	0.000707478
955	105	235	R	80	76	154	68	5.31	5.08	0	ralt	TRUE	0.512376	4	0	FALSE	13.2611	11.094	6.10235	FALSE	FALSE	24	0.0147601	6.08215	4.8415	0.00118835
956	105	236	R	80	157	193	131	5.18	3.82	0	ralt	TRUE	0.454377	4	0	FALSE	-12.2086	6.76961	19.2591	FALSE	FALSE	25	0.0147059	6.08746	4.84546	0.00118414
957	105	237	I	40	3	121	112	5.04	4.64	0	ralt	TRUE	0.966331	4	0.124286	FALSE	-8.59522	-8.10028	-0.25238	FALSE	FALSE	15	0.014652	6.09276	4.84942	0.00117996
958	105	238	I	40	0	168	107	5.13	5.38	1	lalt	TRUE	0.54725	4	0	FALSE	37.042	55.7859	-35.5167	FALSE	FALSE	14	0.0729927	3.7761	4.84539	0.000697756
959	105	239	T	80	3	121	112	4.48	4.54	1	ralt	FALSE	1.49522	4	0	FALSE	16.5341	38.2106	-24.7237	FALSE	FALSE	33	0.0727273	3.78136	4.84142	0.000219046
960	106	0	I	20	76	154	68	3.96	3.56	1	lalt	FALSE	0.835285	1	0.127714	FALSE	-5.45076	-14.8639	14.7658	FALSE	FALSE	12	0.0277778	5.16993	5.1554	0.0145257
961	106	1	A	80	138	154	91	4.74	5.13	1	ralt	TRUE	0.644484	1	0.262286	FALSE	3.51408	-8.28246	16.1843	FALSE	FALSE	4	0.027027	5.20945	5.14266	0.0272606
962	106	2	D	40	157	193	131	4.43	5.35	0	ralt	FALSE	1.13747	1	0.121143	FALSE	5.94009	3.45906	-6.16279	FALSE	FALSE	7	0.0263158	5.24793	5.13156	0.0266152
963	106	3	D	40	3	121	112	4.19	5.01	1	ralt	TRUE	1.42341	1	0.330286	FALSE	-6.30781	-1.68293	0.908746	FALSE	FALSE	9	0.025641	5.2854	5.12193	0.0259994
964	106	4	T	40	157	193	131	4.62	4.97	1	lalt	FALSE	0.39747	1	0.129143	FALSE	3.57494	-3.50085	0.0565615	FALSE	FALSE	31	0.025	5.32193	5.11365	0.0254112
965	106	5	O	80	0	168	107	4.91	4.34	1	ralt	TRUE	0.983604	1	0	FALSE	4.4969	-11.3262	7.87908	FALSE	FALSE	20	0.0243902	5.35755	5.1066	0.0248488
966	106	6	R	20	75	124	89	3.65	4.5	1	ralt	TRUE	0.723733	1	0	FALSE	9.21014	4.54835	-7.90856	FALSE	FALSE	29	0.0238095	5.39232	5.10068	0.0243105
967	106	7	I	20	138	154	91	3.95	5.06	0	ralt	FALSE	0.459886	1	0.120286	FALSE	6.6704	-13.0319	13.7049	FALSE	FALSE	16	0.0232558	5.42626	5.0958	0.0237949
968	106	8	A	80	138	154	91	4.21	4.49	1	lalt	FALSE	0.691983	1	0	FALSE	5.85406	0.134111	-8.16368	FALSE	FALSE	4	0.0454545	4.45943	5.07508	0.0178536
969	106	9	I	20	76	154	68	4.94	4.84	1	ralt	TRUE	1.19507	1	0.126	FALSE	20.5308	5.78324	-9.10534	FALSE	FALSE	12	0.0444444	4.49185	5.05596	0.0121691
970	106	10	I	20	0	168	107	4.87	5.1	0	ralt	FALSE	0.95012	1	0	FALSE	9.40263	-9.81121	4.61785	FALSE	FALSE	14	0.0217391	5.52356	5.05438	0.0171555
971	106	11	I	20	76	154	68	4.43	4.16	1	lalt	FALSE	1.97198	1	0.112857	FALSE	5.3921	-15.6103	19.2918	FALSE	FALSE	12	0.0638298	3.96963	5.02757	0.0148526
972	106	12	T	40	75	124	89	5.36	5.09	0	ralt	FALSE	0.916153	1	0	FALSE	3.14667	-3.27187	2.53385	FALSE	FALSE	35	0.0208333	5.58496	5.02788	0.0145759
973	106	13	R	20	75	124	89	5.01	4.8	1	ralt	TRUE	1.02413	1	0	FALSE	20.7732	8.31197	-7.78638	FALSE	FALSE	29	0.0408163	4.61471	5.01366	0.0162041
974	106	14	O	80	3	121	112	3.92	4.23	0	ralt	FALSE	1.83312	1	0	FALSE	10.8183	-14.9074	-4.2226	FALSE	FALSE	21	0.02	5.64386	5.01537	0.0159097
975	106	15	R	20	75	124	89	5.49	5.26	1	ralt	TRUE	1.39723	1	0	FALSE	-2.26677	-7.77884	3.46447	FALSE	FALSE	29	0.0588235	4.08746	4.99361	0.013804
976	106	16	T	40	157	193	131	5.15	4.28	1	ralt	TRUE	0.964141	1	0.109143	FALSE	4.12833	-18.4178	15.1522	FALSE	FALSE	31	0.0384615	4.70044	4.98245	0.00893956
977	106	17	I	20	0	168	107	5.25	3.81	0	lalt	TRUE	1.4592	1	0	FALSE	5.89339	-2.54574	3.11568	FALSE	FALSE	14	0.0377358	4.72792	4.97221	0.010548
978	106	18	R	20	75	124	89	4.71	3.99	1	ralt	TRUE	0.641317	1	0	FALSE	6.54507	0.24025	0.770307	FALSE	FALSE	29	0.0740741	3.75489	4.94728	0.00773398
979	106	19	D	40	0	168	107	3.57	4.1	0	ralt	FALSE	0.645442	1	0.141143	FALSE	10.0509	16.129	-15.3161	FALSE	FALSE	8	0.0181818	5.78136	4.95246	0.0119904
980	106	20	R	20	3	121	112	3.65	5.08	0	ralt	FALSE	0.331684	1	0	FALSE	6.82979	-11.2476	4.11925	FALSE	FALSE	27	0.0178571	5.80735	4.9579	0.0186451
981	106	21	A	80	138	154	91	4.18	4.19	1	ralt	TRUE	0.543717	1	0	FALSE	10.5427	-4.78079	3.42391	FALSE	FALSE	4	0.0526316	4.24793	4.94213	0.01248
982	106	22	R	20	3	121	112	4.46	5.4	0	ralt	FALSE	0.316984	1	0	FALSE	12.6535	2.45113	-14.1615	FALSE	FALSE	27	0.0344828	4.85798	4.93562	0.00812896
983	106	23	O	80	157	193	131	4.68	4.1	0	lalt	TRUE	0.309045	1	0	FALSE	14.6516	-1.29701	6.67563	FALSE	FALSE	19	0.0169492	5.88264	4.94232	0.0136719
984	106	24	I	20	3	121	112	4.11	4	0	ralt	FALSE	0.376196	1	0.144857	FALSE	8.85997	-20.0354	10.1994	FALSE	FALSE	15	0.0166667	5.90689	4.94919	0.0174795
985	106	25	A	80	75	124	89	5.28	4.62	0	ralt	FALSE	0.814375	1	0.123143	FALSE	12.1017	11.6192	-8.58609	FALSE	FALSE	5	0.0163934	5.93074	4.95622	0.0172104
986	106	26	A	80	138	154	91	4.6	4.98	1	ralt	TRUE	0.560399	1	0	FALSE	6.39267	10.6175	-13.0204	FALSE	FALSE	4	0.0645161	3.9542	4.93785	0.0107533
987	106	27	D	40	138	154	91	4.21	5.25	0	ralt	FALSE	1.10437	1	0	FALSE	14.6577	-0.230511	1.51111	FALSE	FALSE	10	0.015873	5.97728	4.94556	0.0105969
988	106	28	A	80	76	154	68	4.9	3.93	0	ralt	FALSE	0.404516	1	0	FALSE	13.1006	6.37382	-7.99254	FALSE	FALSE	0	0.015625	6	4.95338	0.0164506
989	106	29	R	20	3	121	112	3.62	3.76	0	lalt	TRUE	0.634653	1	0	FALSE	8.89357	5.08376	-3.49459	FALSE	FALSE	27	0.0461538	4.43741	4.94244	0.0110627
990	106	30	R	20	76	154	68	4.22	5.38	0	lalt	TRUE	1.40782	1	0	FALSE	16.7579	-0.912386	5.2686	FALSE	FALSE	24	0.0151515	6.04439	4.95073	0.0109077
991	106	31	D	40	3	121	112	3.72	3.93	1	ralt	TRUE	0.265934	1	0	FALSE	22.0525	10.0264	5.71653	FALSE	FALSE	9	0.0298507	5.06609	4.94799	0.0121502
992	106	32	O	80	0	168	107	3.68	3.85	1	lalt	FALSE	0.813128	1	0	FALSE	9.87819	-3.69815	-2.1686	FALSE	FALSE	20	0.0294118	5.08746	4.94564	0.00843104
993	106	33	R	20	75	124	89	4.03	4.52	1	ralt	TRUE	0.550339	1	0.132	FALSE	1.3557	-5.31385	-0.320921	FALSE	FALSE	29	0.0724638	3.7866	4.9273	0.00579545
994	106	34	O	80	0	168	107	4.8	3.93	1	ralt	TRUE	0.729486	1	0	FALSE	13.8735	1.24151	-6.23107	FALSE	FALSE	20	0.0428571	4.54432	4.91899	0.00438799
995	106	35	O	80	0	168	107	4.11	3.67	1	ralt	TRUE	0.306645	1	0	FALSE	13.9563	14.7224	-13.4376	FALSE	FALSE	20	0.056338	4.14975	4.90612	0.0105362
996	106	36	A	80	0	168	107	4.17	4.15	0	lalt	TRUE	0.893785	1	0	FALSE	11.1701	-1.45594	-5.34259	FALSE	FALSE	2	0.0138889	6.16993	4.91594	0.00936969
997	106	37	A	80	138	154	91	4	4.76	1	ralt	TRUE	0.676007	1	0	FALSE	2.92749	-8.06268	12.44	FALSE	FALSE	4	0.0684932	3.8679	4.90008	0.00882578
998	106	38	O	80	76	154	68	5.42	4.4	0	ralt	FALSE	1.96902	1	0.147714	FALSE	12.337	2.09622	-5.2147	FALSE	FALSE	18	0.0135135	6.20945	4.91023	0.00871529
999	106	39	O	80	0	168	107	4.8	4.55	1	lalt	FALSE	1.35101	1	0.143429	FALSE	8.10321	5.76724	-5.76151	FALSE	FALSE	20	0.0666667	3.90689	4.89538	0.00860752
1000	106	40	D	40	3	121	112	4.76	5.35	1	ralt	TRUE	0.28812	1	0.141429	FALSE	4.18735	11.9848	-7.75516	FALSE	FALSE	9	0.0394737	4.66297	4.88966	0.00408873
1001	106	41	D	40	3	121	112	3.66	4.25	1	ralt	TRUE	0.247177	1	0	FALSE	-0.652649	6.96876	-8.41924	FALSE	FALSE	9	0.0519481	4.26679	4.87965	0.00976668
1002	106	42	O	80	0	168	107	4.52	4.82	1	ralt	TRUE	0.980345	1	0	FALSE	1.80193	-11.3806	0.692873	FALSE	FALSE	20	0.0769231	3.70044	4.8634	0.00308665
1003	106	43	D	40	76	154	68	4.15	5.21	0	ralt	FALSE	0.729413	1	0.150857	FALSE	12.2171	3.90925	-0.931659	FALSE	FALSE	6	0.0126582	6.30378	4.87455	0.00793346
1004	106	44	O	80	76	154	68	5.03	4.18	0	lalt	TRUE	1.47644	1	0	FALSE	5.44806	-15.1784	20.1143	FALSE	FALSE	18	0.025	5.32193	4.87633	0.0102874
1005	106	45	D	40	157	193	131	4.03	3.59	0	lalt	TRUE	0.491542	1	0	FALSE	15.5135	2.83011	1.74912	FALSE	FALSE	7	0.0246914	5.33985	4.87828	0.00717822
1006	106	46	I	20	75	124	89	5	4.5	0	ralt	FALSE	0.781749	1	0	FALSE	7.18055	-4.83698	-6.71423	FALSE	FALSE	17	0.0121951	6.35755	4.88949	0.0100502
1007	106	47	O	80	138	154	91	5.42	5.37	0	lalt	TRUE	0.389852	1	0	FALSE	1.99095	-13.6571	5.46803	FALSE	FALSE	22	0.0120482	6.37504	4.90065	0.0128536
1008	106	48	I	20	157	193	131	5.07	4.83	0	ralt	FALSE	0.340796	1	0.147714	FALSE	15.8384	-1.83972	-12.4762	FALSE	FALSE	13	0.0119048	6.39232	4.91174	0.0127073
1009	106	49	D	40	0	168	107	4.96	3.58	0	ralt	FALSE	0.289919	1	0.133714	FALSE	3.57036	3.50233	0.590581	FALSE	FALSE	8	0.0235294	5.40939	4.914	0.00971415
1010	106	50	T	40	157	193	131	4.58	3.96	1	lalt	FALSE	0.668045	1	0.137714	FALSE	15.3333	17.1995	-7.4411	FALSE	FALSE	31	0.0348837	4.8413	4.91076	0.00570074
1011	106	51	O	80	0	168	107	3.72	5.34	1	ralt	TRUE	0.362122	1	0	FALSE	3.83863	-4.47302	-0.123642	FALSE	FALSE	20	0.0804598	3.63559	4.89524	0.00321167
1012	106	52	D	40	3	121	112	4.24	4.42	1	ralt	TRUE	0.411352	1	0	FALSE	16.3855	26.7549	-15.4652	FALSE	FALSE	9	0.0568182	4.1375	4.8853	0.00225913
1013	106	53	A	80	138	154	91	4.76	4.54	1	ralt	TRUE	0.560491	1	0	FALSE	-0.279423	-8.56018	1.32365	FALSE	FALSE	4	0.0674157	3.89077	4.87307	0.00241134
1014	106	54	O	80	138	154	91	4.75	3.58	0	lalt	TRUE	0.651531	1	0	FALSE	21.4878	16.1469	-16.1018	FALSE	FALSE	22	0.0222222	5.49185	4.87653	0.00433038
1015	106	55	I	20	138	154	91	4.03	3.84	0	ralt	FALSE	0.39874	1	0.131714	FALSE	1.49981	-3.4804	-1.23114	FALSE	FALSE	16	0.021978	5.50779	4.88008	0.00644087
1016	106	56	T	40	157	193	131	4.16	3.96	1	lalt	FALSE	0.491943	1	0	FALSE	-0.652022	-2.41565	5.50026	FALSE	FALSE	31	0.0434783	4.52356	4.87454	0.00481355
1017	106	57	T	40	157	193	131	4.73	5.14	1	ralt	TRUE	0.613114	1	0	FALSE	3.667	-11.6265	-1.88963	FALSE	FALSE	31	0.0537634	4.21723	4.86618	0.00631114
1018	106	58	T	40	157	193	131	5.22	3.54	1	ralt	TRUE	0.240151	1	0	FALSE	17.0178	29.2969	-32.7041	FALSE	FALSE	31	0.0638298	3.96963	4.85563	0.0050715
1019	106	59	I	20	157	193	131	4.36	3.98	0	ralt	FALSE	1.03129	1	0	FALSE	-2.99454	-15.8896	-6.69054	FALSE	FALSE	13	0.0210526	5.56986	4.85989	0.00412254
1020	106	60	A	80	0	168	107	4.42	3.69	0	ralt	FALSE	0.365396	2	0.332	FALSE	-5.66047	-21.882	37.9597	FALSE	FALSE	2	0.0208333	5.58496	4.86423	0.00612601
1021	106	61	A	80	3	121	112	4.74	3.66	0	ralt	FALSE	0.453592	2	0.138	FALSE	12.6799	7.17136	-16.6831	FALSE	FALSE	3	0.0103093	6.59991	4.87633	0.00856784
1022	106	62	I	20	75	124	89	3.86	5.31	0	lalt	TRUE	0.743721	2	0	FALSE	29.1471	11.7206	-14.4103	FALSE	FALSE	17	0.0204082	5.61471	4.88071	0.00848438
1023	106	63	A	80	138	154	91	4.64	4.84	1	ralt	TRUE	0.392953	2	0	FALSE	3.72944	14.0102	-11.3432	FALSE	FALSE	4	0.0707071	3.822	4.86921	0.00381414
1024	106	64	I	20	76	154	68	4.08	4.56	1	ralt	TRUE	0.355949	2	0.144286	FALSE	2.8742	-13.5807	-4.32038	FALSE	FALSE	12	0.04	4.64386	4.86539	0.00234119
1025	106	65	I	20	76	154	68	4.53	4.69	1	ralt	TRUE	0.271124	2	0	FALSE	5.06597	6.14558	-5.97384	FALSE	FALSE	12	0.049505	4.33628	4.85895	0.00584041
1026	106	66	I	20	3	121	112	4.73	3.97	0	lalt	TRUE	0.544218	2	0	FALSE	0.479326	-1.39862	3.57048	FALSE	FALSE	15	0.0196078	5.67243	4.86388	0.00407109
1027	106	67	T	40	0	168	107	4.07	4.71	0	ralt	FALSE	0.58534	2	0	FALSE	2.6264	-2.72354	5.25583	FALSE	FALSE	32	0.00970874	6.6865	4.87612	0.00809031
1028	106	68	T	40	76	154	68	4.47	3.99	0	ralt	FALSE	0.545488	2	0.289429	FALSE	1.14694	-11.4302	17.1193	FALSE	FALSE	30	0.00961538	6.70044	4.88825	0.0103502
1029	106	69	R	20	75	124	89	4.03	5.2	1	lalt	FALSE	0.5116	2	0.145143	FALSE	7.38833	3.55323	0.83474	FALSE	FALSE	29	0.0571429	4.12928	4.88008	0.00607348
1030	106	70	D	40	75	124	89	4.28	4.25	0	ralt	FALSE	1.16868	2	0.145429	FALSE	12.2594	6.25164	-8.21334	FALSE	FALSE	11	0.00943396	6.72792	4.8922	0.00601916
1031	106	71	T	40	3	121	112	4.04	4.98	0	ralt	FALSE	0.439855	2	0.144	FALSE	17.2855	17.0311	-21.7702	FALSE	FALSE	33	0.00934579	6.74147	4.90423	0.01007
1032	106	72	O	80	0	168	107	3.7	4.49	1	lalt	FALSE	0.871952	2	0	FALSE	12.118	-2.67228	6.90761	FALSE	FALSE	20	0.0740741	3.75489	4.89295	0.00566179
1033	106	73	A	80	138	154	91	4.6	3.51	1	ralt	TRUE	0.393238	2	0	FALSE	13.3312	-5.42511	-7.29069	FALSE	FALSE	4	0.0733945	3.76818	4.882	0.0013337
1034	106	74	R	20	75	124	89	3.92	5.1	1	ralt	TRUE	0.535334	2	0	FALSE	13.6334	7.02276	-4.71116	FALSE	FALSE	29	0.0636364	3.974	4.87299	0.00143049
1035	106	75	O	80	0	168	107	3.67	4.1	1	lalt	FALSE	0.863417	2	0.142	FALSE	7.64857	-8.94979	9.35841	FALSE	FALSE	20	0.0810811	3.62449	4.86121	0.00133686
1036	106	76	T	40	157	193	131	4.02	5.25	1	ralt	TRUE	1.02954	2	0.132571	FALSE	-2.63014	-11.2136	12.0491	FALSE	FALSE	31	0.0625	4	4.85277	0.00132709
1037	106	77	R	20	75	124	89	4.66	4.8	1	ralt	TRUE	0.387701	2	0	FALSE	-5.59525	-4.71146	3.75631	FALSE	FALSE	29	0.0707965	3.82018	4.84301	0.00139899
1038	106	78	T	40	157	193	131	5.22	4.74	1	lalt	FALSE	0.535769	2	0.127429	FALSE	9.0055	-5.54174	-5.45211	FALSE	FALSE	31	0.0701754	3.83289	4.83353	0.00128587
1039	106	79	R	20	75	124	89	5.18	4.37	1	lalt	FALSE	0.774828	2	0	FALSE	10.3925	-9.11679	5.65168	FALSE	FALSE	29	0.0782609	3.67557	4.82293	0.00119657
1040	106	80	T	40	138	154	91	4.99	3.76	0	lalt	TRUE	0.540901	2	0.122	FALSE	9.44177	-2.50772	-3.1713	FALSE	FALSE	34	0.00862069	6.85798	4.83562	0.00521107
1041	106	81	T	40	0	168	107	4.48	4.76	0	ralt	FALSE	0.792021	2	0.134857	FALSE	10.1402	-9.23527	11.0295	FALSE	FALSE	32	0.017094	5.87036	4.84179	0.00715903
1042	106	82	R	20	75	124	89	5.2	5.35	1	ralt	TRUE	0.654112	2	0.133714	FALSE	9.78617	-5.82987	-2.01223	FALSE	FALSE	29	0.0847458	3.56071	4.83049	0.00300432
1043	106	83	T	40	157	193	131	4.79	5.21	1	ralt	TRUE	0.695071	2	0.134	FALSE	12.1558	10.8886	-15.3168	FALSE	FALSE	31	0.0756303	3.72489	4.82068	0.00102387
1044	106	84	A	80	0	168	107	3.73	3.83	0	ralt	FALSE	0.34515	2	0.361429	FALSE	4.36038	-0.480436	5.27158	FALSE	FALSE	2	0.025	5.32193	4.82308	0.00223701
1045	106	85	D	40	157	193	131	3.92	5.33	0	lalt	TRUE	0.584377	2	0	FALSE	14.3539	6.85031	-7.64239	FALSE	FALSE	7	0.0247934	5.3339	4.82553	0.00336883
1046	106	86	A	80	138	154	91	5.01	5.5	1	lalt	FALSE	0.272497	2	0.155143	FALSE	4.83327	-9.62192	4.28604	FALSE	FALSE	4	0.0737705	3.76081	4.81629	0.00220386
1047	106	87	O	80	138	154	91	5.15	4.89	0	ralt	FALSE	1.26743	2	0.145429	FALSE	15.3963	10.8308	-14.013	FALSE	FALSE	22	0.0243902	5.35755	4.81895	0.00218765
1048	106	88	A	80	138	154	91	5.12	4.04	1	ralt	TRUE	0.46149	2	0	FALSE	-0.956237	-7.24467	-6.9711	FALSE	FALSE	4	0.0806452	3.63227	4.80895	0.00211173
1049	106	89	A	80	157	193	131	4.14	5.13	0	ralt	FALSE	0.715562	2	0.140571	FALSE	19.0744	-5.17838	4.1282	FALSE	FALSE	1	0.008	6.96578	4.82169	0.00479368
1050	106	90	A	80	3	121	112	5.37	4.4	0	lalt	TRUE	0.907631	2	0.128286	FALSE	27.063	10.2652	1.38259	FALSE	FALSE	3	0.015873	5.97728	4.82837	0.00666564
1051	106	91	I	20	76	154	68	4.44	4.71	1	ralt	TRUE	0.578703	2	0	FALSE	15.7796	-1.56911	-6.78171	FALSE	FALSE	12	0.0472441	4.40372	4.82421	0.00315207
1052	106	92	T	40	76	154	68	4.54	3.6	0	ralt	FALSE	0.300824	2	0	FALSE	15.0561	5.54306	-8.19965	FALSE	FALSE	30	0.015625	6	4.83095	0.00312902
1053	106	93	D	40	3	121	112	4.39	4.03	1	ralt	TRUE	0.255067	2	0	FALSE	5.57306	-5.51373	-1.09779	FALSE	FALSE	9	0.0465116	4.42626	4.827	0.0031063
1054	106	94	R	20	157	193	131	5.34	5.14	0	ralt	FALSE	0.626198	2	0.152286	FALSE	-0.494247	-16.1031	12.2153	FALSE	FALSE	25	0.00769231	7.02237	4.83955	0.00495499
1055	106	95	O	80	138	154	91	4.67	5.33	0	lalt	TRUE	0.980162	2	0	FALSE	14.0075	-2.53188	7.47332	FALSE	FALSE	22	0.0305344	5.03342	4.83979	0.00531945
1056	106	96	I	20	76	154	68	5.09	3.81	1	lalt	FALSE	0.820175	2	0	FALSE	13.7541	4.44582	-9.15475	FALSE	FALSE	12	0.0530303	4.23704	4.83456	0.0018308
1057	106	97	D	40	3	121	112	4.1	4.29	1	ralt	TRUE	0.249322	2	0	FALSE	8.9246	-9.19344	-2.2752	FALSE	FALSE	9	0.0526316	4.24793	4.82949	0.00130733
1058	106	98	O	80	3	121	112	5.01	4.38	0	ralt	FALSE	0.302518	2	0	FALSE	3.98028	-3.57251	7.49095	FALSE	FALSE	21	0.0149254	6.06609	4.83638	0.00288201
1059	106	99	R	20	157	193	131	5.45	5.46	0	ralt	FALSE	0.329547	2	0.148571	FALSE	16.7224	9.00951	-10.1921	FALSE	FALSE	25	0.0148148	6.07682	4.84324	0.00443352
1060	106	100	O	80	157	193	131	5.09	4.24	0	lalt	TRUE	0.709658	2	0.148857	FALSE	1.24005	-16.4693	9.69036	FALSE	FALSE	19	0.0147059	6.08746	4.85008	0.00440231
1061	106	101	R	20	75	124	89	4.86	4.52	1	ralt	TRUE	0.801633	2	0	FALSE	11.9284	2.529	-6.75942	FALSE	FALSE	29	0.080292	3.6386	4.84088	0.00257069
1062	106	102	T	40	0	168	107	3.82	4.68	0	ralt	FALSE	0.505724	2	0.15	FALSE	14.3138	3.57624	-4.54017	FALSE	FALSE	32	0.0217391	5.52356	4.84426	0.00187173
1063	106	103	O	80	0	168	107	5.31	3.82	1	lalt	FALSE	0.771786	2	0.148857	FALSE	3.54242	-10.9527	9.70185	FALSE	FALSE	20	0.0719424	3.79701	4.83632	0.0019035
1064	106	104	R	20	157	193	131	4.06	4.02	0	lalt	TRUE	1.17092	2	0	FALSE	18.2951	7.58768	-9.56628	FALSE	FALSE	25	0.0214286	5.54432	4.83984	0.00189106
1065	106	105	I	20	138	154	91	4.88	5.27	0	lalt	TRUE	0.804104	2	0	FALSE	-0.312442	-3.4522	1.23123	FALSE	FALSE	16	0.0212766	5.55459	4.84337	0.00291829
1066	106	106	I	20	138	154	91	4.32	5.03	0	ralt	FALSE	1.44007	2	0.302	FALSE	15.658	5.33172	10.8328	FALSE	FALSE	16	0.028169	5.14975	4.84439	0.00544804
1067	106	107	A	80	0	168	107	5.02	5.24	0	ralt	FALSE	1.00309	2	0.155714	FALSE	15.1977	7.08958	-5.43863	FALSE	FALSE	2	0.027972	5.15987	4.84545	0.00217824
1068	106	108	A	80	75	124	89	3.9	3.82	0	ralt	FALSE	0.506065	2	0.152286	FALSE	3.81501	5.62728	-10.483	FALSE	FALSE	5	0.0138889	6.16993	4.85247	0.00316589
1069	106	109	D	40	3	121	112	4.8	4.67	1	ralt	TRUE	0.488348	2	0.187143	FALSE	11.5144	-8.66771	3.83216	FALSE	FALSE	9	0.0551724	4.17991	4.8473	0.00259505
1070	106	110	A	80	157	193	131	3.71	4.28	0	ralt	FALSE	0.64939	2	0.197714	FALSE	6.61768	-20.5523	14.0035	FALSE	FALSE	1	0.0136986	6.18982	4.85434	0.00257833
1071	106	111	I	20	76	154	68	4.8	4.04	1	lalt	FALSE	0.562639	2	0.178857	FALSE	1.55356	1.73905	1.30721	FALSE	FALSE	12	0.0544218	4.19967	4.84937	0.00256182
1072	106	112	T	40	138	154	91	4.2	4.61	0	ralt	FALSE	0.7098	2	0.152	FALSE	9.66658	-2.67968	-3.01202	FALSE	FALSE	34	0.0135135	6.20945	4.85643	0.00254552
1073	106	113	D	40	3	121	112	5.15	4.59	1	ralt	TRUE	0.336901	2	0.199143	FALSE	20.2813	-10.4397	-0.813554	FALSE	FALSE	9	0.0604027	4.04924	4.85057	0.00246746
1074	106	114	T	40	157	193	131	4.31	3.5	1	lalt	FALSE	1.03498	2	0.330571	FALSE	8.45901	-8.88537	11.968	FALSE	FALSE	31	0.0666667	3.90689	4.84389	0.000847024
1075	106	115	D	40	76	154	68	3.69	5.49	0	lalt	TRUE	1.11109	2	0	FALSE	14.8632	-8.55051	2.95336	FALSE	FALSE	6	0.013245	6.2384	4.85104	0.0023874
1076	106	116	D	40	138	154	91	4.44	4.17	0	lalt	TRUE	1.35811	2	0.131143	FALSE	-4.37149	-16.7745	7.43177	FALSE	FALSE	10	0.0131579	6.24793	4.85816	0.0039566
1077	106	117	O	80	0	168	107	3.83	5.13	1	ralt	TRUE	0.457276	2	0	FALSE	8.29674	-3.05511	-7.95479	FALSE	FALSE	20	0.0718954	3.79796	4.85089	0.00231797
1078	106	118	D	40	3	121	112	5.33	5.03	1	ralt	TRUE	0.29842	2	0	FALSE	12.1234	5.89889	-5.52127	FALSE	FALSE	9	0.0649351	3.94486	4.84463	0.000740272
1079	106	119	T	40	75	124	89	5.45	4.08	0	ralt	FALSE	0.534471	2	0.149143	FALSE	26.4243	10.4032	-12.3317	FALSE	FALSE	35	0.0129032	6.27612	4.85183	0.00232936
1080	106	120	R	20	0	168	107	3.83	4.85	0	ralt	FALSE	0.346434	3	0.164	FALSE	3.56314	-4.62808	8.49633	FALSE	FALSE	26	0.00641026	7.2854	4.86381	0.00542014
1081	106	121	O	80	0	168	107	4.55	5.42	1	ralt	TRUE	0.487512	3	0.153143	FALSE	10.4417	9.28082	-15.9848	FALSE	FALSE	20	0.0764331	3.70966	4.85617	0.00378099
1082	106	122	R	20	76	154	68	4.78	4.38	0	lalt	TRUE	0.700607	3	0	FALSE	18.0525	5.40311	-1.23745	FALSE	FALSE	24	0.0126582	6.30378	4.86334	0.00221636
1083	106	123	D	40	3	121	112	4.04	4.89	1	ralt	TRUE	0.384732	3	0	FALSE	8.09327	-8.71858	-0.693971	FALSE	FALSE	9	0.0691824	3.85345	4.85666	0.00223552
1084	106	124	A	80	75	124	89	3.63	3.84	0	ralt	FALSE	0.314864	3	0.154571	FALSE	12.2086	1.21262	-4.27603	FALSE	FALSE	5	0.01875	5.73697	4.8608	0.00163391
1085	106	125	A	80	138	154	91	4.2	4.77	1	ralt	TRUE	0.671155	3	0.139429	FALSE	9.63787	-7.65848	3.03327	FALSE	FALSE	4	0.068323	3.87149	4.85433	0.00162452
1086	106	126	I	20	76	154	68	3.63	3.68	1	lalt	FALSE	0.744247	3	0	FALSE	16.9543	-9.98372	3.68709	FALSE	FALSE	12	0.0555556	4.16993	4.84968	0.000755604
1087	106	127	I	20	76	154	68	4.69	5	1	ralt	TRUE	0.424465	3	0	FALSE	6.40691	-2.19231	-1.96526	FALSE	FALSE	12	0.0613497	4.0268	4.84427	0.00171613
1088	106	128	R	20	75	124	89	3.94	5.49	1	lalt	FALSE	0.886462	3	0.151714	FALSE	13.6288	15.564	-12.9484	FALSE	FALSE	29	0.0731707	3.77259	4.83744	0.000671047
1089	106	129	O	80	157	193	131	4.72	4.14	0	lalt	TRUE	0.659522	3	0	FALSE	13.3728	5.83887	-9.02327	FALSE	FALSE	19	0.0181818	5.78136	4.84185	0.00155687
1090	106	130	R	20	75	124	89	3.56	4.92	1	ralt	TRUE	0.652703	3	0.158	FALSE	-4.15785	-14.1915	16.3936	FALSE	FALSE	29	0.0783133	3.6746	4.83456	0.00152189
1091	106	131	I	20	3	121	112	5.16	5.48	0	lalt	TRUE	0.646868	3	0	FALSE	13.701	-22.404	15.4596	FALSE	FALSE	15	0.0179641	5.79874	4.83903	0.00151345
1092	106	132	I	20	0	168	107	3.55	5.46	0	lalt	TRUE	1.1288	3	0	FALSE	14.2555	1.52116	5.04805	FALSE	FALSE	14	0.0178571	5.80735	4.8435	0.0024716
1093	106	133	D	40	0	168	107	5.32	4.74	0	ralt	FALSE	0.825902	3	0.174571	FALSE	7.53199	-16.7578	13.2407	FALSE	FALSE	8	0.0177515	5.81592	4.84796	0.00245766
1094	106	134	I	20	76	154	68	4.56	4.08	1	lalt	FALSE	0.828905	3	0.150571	FALSE	8.24788	-12.3678	0.758777	FALSE	FALSE	12	0.0647059	3.94996	4.84236	0.00154459
1095	106	135	O	80	0	168	107	4.46	3.84	1	lalt	FALSE	1.16894	3	0.140857	FALSE	10.6891	-5.96203	4.78164	FALSE	FALSE	20	0.0760234	3.71741	4.83553	0.00058655
1096	106	136	I	20	3	121	112	3.65	5.16	0	lalt	TRUE	0.821155	3	0.136571	FALSE	-1.09097	-6.89115	12.0846	FALSE	FALSE	15	0.0232558	5.42626	4.83801	0.00118066
1097	106	137	D	40	138	154	91	3.67	5.11	0	lalt	TRUE	1.60226	3	0	FALSE	4.45994	-4.20688	-1.4029	FALSE	FALSE	10	0.017341	5.84967	4.84259	0.00211316
1098	106	138	D	40	157	193	131	3.95	4.84	0	lalt	TRUE	0.6733	3	0.135429	FALSE	-5.32221	-21.456	2.49939	FALSE	FALSE	7	0.0229885	5.44294	4.8451	0.00210163
1099	106	139	A	80	138	154	91	4.01	5.04	1	ralt	TRUE	0.938434	3	0	FALSE	4.53562	-8.9961	0.829627	FALSE	FALSE	4	0.0685714	3.86625	4.83922	0.00118713
1100	106	140	I	20	157	193	131	4.45	4.23	0	lalt	TRUE	0.960497	3	0	FALSE	9.87369	6.17044	1.96442	FALSE	FALSE	13	0.0170455	5.87447	4.84387	0.00146632
1101	106	141	I	20	76	154	68	4.44	5.09	1	ralt	TRUE	0.557662	3	0.127143	FALSE	12.9102	6.60137	4.79112	FALSE	FALSE	12	0.0677966	3.88264	4.83816	0.0014586
1102	106	142	D	40	75	124	89	3.57	4.28	0	lalt	TRUE	0.829701	3	0	FALSE	-2.92373	-15.2999	13.9738	FALSE	FALSE	11	0.011236	6.47573	4.84559	0.00198023
1103	106	143	A	80	157	193	131	4.29	3.56	0	ralt	FALSE	0.627906	3	0.138857	FALSE	10.8446	-13.6902	5.69484	FALSE	FALSE	1	0.0167598	5.89885	4.85025	0.00285277
1104	106	144	T	40	138	154	91	4.66	5.1	0	ralt	FALSE	1.67604	3	0.144286	FALSE	21.3781	6.59152	-12.1704	FALSE	FALSE	34	0.0166667	5.90689	4.85491	0.00231409
1105	106	145	R	20	76	154	68	4.9	5.15	0	lalt	TRUE	0.952026	3	0.15	FALSE	17.05	-4.71479	-10.7097	FALSE	FALSE	24	0.0165746	5.91488	4.85956	0.00230186
1106	106	146	T	40	157	193	131	4.38	4.71	1	lalt	FALSE	0.721052	3	0.320857	FALSE	13.4375	-3.53103	7.93649	FALSE	FALSE	31	0.0604396	4.04836	4.8548	0.00144944
1107	106	147	I	20	76	154	68	4.34	4.45	1	ralt	TRUE	1.29907	3	0	FALSE	8.25338	2.72589	2.36903	FALSE	FALSE	12	0.0710383	3.81526	4.84888	0.000554333
1108	106	148	O	80	75	124	89	4.05	4.38	0	lalt	TRUE	0.906233	3	0	FALSE	7.481	-8.11974	-1.48549	FALSE	FALSE	23	0.00543478	7.52356	4.86035	0.00322007
1109	106	149	T	40	157	193	131	5.01	3.72	1	lalt	FALSE	0.775313	3	0.143143	FALSE	11.6326	-4.7552	-3.52709	FALSE	FALSE	31	0.0648649	3.94642	4.85514	0.00322682
1110	106	150	I	20	76	154	68	3.97	3.86	1	lalt	FALSE	1.05847	3	0.156286	FALSE	11.3041	8.66359	-6.34109	FALSE	FALSE	12	0.0752688	3.7318	4.84889	0.000498974
1111	106	151	R	20	75	124	89	4.26	4.44	1	ralt	TRUE	1.26061	3	0.146857	FALSE	17.1471	0.271398	-4.27908	FALSE	FALSE	29	0.0748663	3.73954	4.84274	0.000453312
1112	106	152	T	40	3	121	112	5.44	4.87	0	lalt	TRUE	0.908718	3	0.0825714	FALSE	0.314196	-15.6745	3.88031	FALSE	FALSE	33	0.0106383	6.55459	4.85016	0.00183681
1113	106	153	R	20	138	154	91	4.75	3.82	0	ralt	FALSE	0.879714	3	0.148857	FALSE	14.8253	7.76913	-5.32589	FALSE	FALSE	28	0.00529101	7.56224	4.86152	0.00449581
1114	106	154	D	40	75	124	89	4.81	5.36	0	lalt	TRUE	1.07483	3	0	FALSE	7.54622	-16.1287	5.98647	FALSE	FALSE	11	0.0157895	5.98489	4.86629	0.00397669
1115	106	155	R	20	75	124	89	4.24	4.32	1	lalt	FALSE	1.47982	3	0.152571	FALSE	14.478	12.9386	-9.04713	FALSE	FALSE	29	0.078534	3.67054	4.85983	0.00129884
1116	106	156	T	40	76	154	68	5.26	4.2	0	ralt	FALSE	0.672973	3	0.156	FALSE	7.39202	5.61471	-4.68811	FALSE	FALSE	30	0.015625	6	4.86463	0.00129252
1117	106	157	O	80	0	168	107	3.63	3.84	1	ralt	TRUE	0.643063	3	0	FALSE	11.2642	-5.14959	0.533406	FALSE	FALSE	20	0.0725389	3.7851	4.85883	0.00130319
1118	106	158	O	80	75	124	89	3.84	5.2	0	lalt	TRUE	0.509245	3	0	FALSE	17.1486	7.44497	-3.04834	FALSE	FALSE	23	0.0103093	6.59991	4.86618	0.00178274
1119	106	159	R	20	0	168	107	3.85	4.97	0	ralt	FALSE	1.17028	3	0.140857	FALSE	10.1869	-7.32789	1.11075	FALSE	FALSE	26	0.0102564	6.60733	4.87349	0.00311001
1120	106	160	I	20	75	124	89	5.34	5.39	0	lalt	TRUE	0.673424	3	0.138	FALSE	4.67293	11.9108	-10.6812	FALSE	FALSE	17	0.0153061	6.02975	4.87827	0.00261371
1121	106	161	D	40	76	154	68	3.55	4.29	0	lalt	TRUE	0.563405	3	0	FALSE	-0.507385	-8.81628	3.34973	FALSE	FALSE	6	0.0152284	6.03709	4.88304	0.00212242
1122	106	162	R	20	0	168	107	4.62	4.09	0	ralt	FALSE	0.353619	3	0.159429	FALSE	9.16547	-9.25087	7.27699	FALSE	FALSE	26	0.0151515	6.04439	4.8878	0.00211212
1123	106	163	T	40	157	193	131	3.86	3.65	1	lalt	FALSE	0.849732	3	0	FALSE	8.33991	7.57555	-7.59048	FALSE	FALSE	31	0.0653266	3.93618	4.88279	0.00128524
1124	106	164	D	40	3	121	112	5.37	4.18	1	ralt	TRUE	0.524908	3	0	FALSE	5.10521	-11.6306	3.44485	FALSE	FALSE	9	0.06	4.05889	4.87842	0.000488435
1125	106	165	A	80	138	154	91	5.21	3.82	1	lalt	FALSE	0.841034	3	0.174857	FALSE	6.33283	-8.42545	2.9697	FALSE	FALSE	4	0.0646766	3.95061	4.87358	0.000486374
1126	106	166	O	80	0	168	107	3.87	5.04	1	ralt	TRUE	0.37616	3	0.142286	FALSE	11.3026	4.36583	-1.92984	FALSE	FALSE	20	0.0742574	3.75132	4.86784	0.000427909
1127	106	167	O	80	0	168	107	3.51	4.68	1	ralt	TRUE	0.275286	3	0.120857	FALSE	4.99629	-9.29212	0.993963	FALSE	FALSE	20	0.0788177	3.66534	4.86174	0.000833828
1128	106	168	R	20	76	154	68	4.25	3.69	0	ralt	FALSE	0.912426	3	0.149429	FALSE	15.872	4.46688	-5.55364	FALSE	FALSE	24	0.0196078	5.67243	4.8649	0.000960739
1129	106	169	T	40	76	154	68	3.59	3.75	0	ralt	FALSE	0.605638	3	0.296286	FALSE	23.6842	7.16769	-0.0163172	FALSE	FALSE	30	0.0195122	5.67948	4.86806	0.00155239
1130	106	170	R	20	75	124	89	4.65	4.22	1	ralt	TRUE	0.738861	3	0.176857	FALSE	15.3654	5.57528	-14.4725	FALSE	FALSE	29	0.0776699	3.6865	4.86216	0.000952122
1131	106	171	R	20	3	121	112	4.11	4.06	0	lalt	TRUE	0.425917	3	0	FALSE	10.7819	-1.95946	-3.79996	FALSE	FALSE	27	0.0193237	5.69349	4.86537	0.00094787
1132	106	172	R	20	138	154	91	5.02	5.41	0	lalt	TRUE	0.628155	3	0	FALSE	-0.016675	3.2022	-2.21243	FALSE	FALSE	28	0.00961538	6.70044	4.87267	0.00222605
1133	106	173	T	40	75	124	89	3.58	5.3	0	lalt	TRUE	0.796208	3	0	FALSE	2.6701	-4.1942	0.235408	FALSE	FALSE	35	0.0143541	6.1224	4.8776	0.00245628
1134	106	174	A	80	75	124	89	3.93	5.36	0	ralt	FALSE	0.320299	3	0.151429	FALSE	9.61396	-11.2761	13.8927	FALSE	FALSE	5	0.0190476	5.71425	4.88079	0.00175658
1135	106	175	R	20	0	168	107	3.77	5.07	0	ralt	FALSE	0.774365	3	0.251429	FALSE	10.7564	1.06434	-3.41492	FALSE	FALSE	26	0.0189573	5.7211	4.88398	0.00151035
1136	106	176	R	20	138	154	91	5.2	5.42	0	lalt	TRUE	0.57141	3	0.147143	FALSE	6.58027	-7.607	4.32737	FALSE	FALSE	28	0.0141509	6.14296	4.88889	0.0017407
1137	106	177	D	40	3	121	112	4.54	4.55	1	ralt	TRUE	0.251524	3	0.129429	FALSE	3.20975	-9.46449	0.101988	FALSE	FALSE	9	0.0610329	4.03427	4.88466	0.00120563
1138	106	178	R	20	75	124	89	3.86	5.23	1	lalt	FALSE	0.819604	3	0.440286	TRUE	3.85006	-16.3796	9.22741	FALSE	FALSE	29	0.0794393	3.654	4.87876	0.0003825
1139	106	179	D	40	3	121	112	5.03	4.11	1	ralt	TRUE	0.609694	3	0.130571	FALSE	15.6601	5.11001	-9.51374	FALSE	FALSE	9	0.0651163	3.94084	4.8742	0.00036353
1140	106	180	D	40	3	121	112	5.27	3.58	1	ralt	TRUE	0.548757	4	0.130286	FALSE	3.50918	-5.7856	0.0171121	FALSE	FALSE	9	0.0694444	3.848	4.86927	0.000845863
1141	106	181	D	40	138	154	91	5.3	4.12	0	lalt	TRUE	0.455892	4	0	FALSE	4.78706	10.8499	10.96	FALSE	FALSE	10	0.0184332	5.76155	4.87261	0.000920567
1142	106	182	D	40	0	168	107	3.75	3.59	0	ralt	FALSE	0.783933	4	0.161714	FALSE	22.0175	-25.9699	-0.49108	FALSE	FALSE	8	0.0183486	5.76818	4.87595	0.00146409
1143	106	183	D	40	3	121	112	5.38	3.81	1	ralt	TRUE	0.293221	4	0.148	FALSE	10.7085	11.6129	-23.4822	FALSE	FALSE	9	0.0730594	3.77479	4.87076	0.000899651
1144	106	184	A	80	157	193	131	5.18	5.33	0	ralt	FALSE	0.584318	4	0.16	FALSE	11.8493	16.2446	-7.50066	FALSE	FALSE	1	0.0181818	5.78136	4.87414	0.000895852
1145	106	185	R	20	75	124	89	4.86	3.64	1	lalt	FALSE	0.603298	4	0.484	TRUE	10.8292	-17.9547	21.4506	FALSE	FALSE	29	0.081448	3.61798	4.86832	0.000870371
1146	106	186	D	40	75	124	89	4.65	5.46	0	lalt	TRUE	0.5544	4	0.151429	FALSE	5.9383	2.47673	-3.37834	FALSE	FALSE	11	0.018018	5.79442	4.87174	0.000866732
1147	106	187	I	20	76	154	68	5.35	3.97	1	lalt	FALSE	1.15945	4	0.142571	FALSE	17.2323	7.07842	-2.30298	FALSE	FALSE	12	0.0672646	3.89401	4.86718	0.000897511
1148	106	188	T	40	0	168	107	5.2	3.99	0	ralt	FALSE	1.34646	4	0.139429	FALSE	-1.08141	-10.0646	5.34671	FALSE	FALSE	32	0.0178571	5.80735	4.87063	0.00089378
1149	106	189	O	80	76	154	68	5.11	4.37	0	lalt	TRUE	0.578564	4	0.135143	FALSE	13.3517	-5.59889	2.47066	FALSE	FALSE	18	0.0133333	6.22882	4.87569	0.00164406
1150	106	190	I	20	75	124	89	4.87	3.64	0	lalt	TRUE	0.551657	4	0	FALSE	2.28391	-15.2897	-6.00183	FALSE	FALSE	17	0.0176991	5.82018	4.87913	0.00163707
1151	106	191	D	40	3	121	112	4.41	4.78	1	ralt	TRUE	0.274779	4	0.140286	FALSE	7.86838	7.35142	-2.49572	FALSE	FALSE	9	0.0748899	3.73909	4.87396	0.000858945
1152	106	192	T	40	138	154	91	5.09	5.33	0	lalt	TRUE	1.0829	4	0.141714	FALSE	6.97789	0.442919	0.636216	FALSE	FALSE	34	0.0175439	5.83289	4.87743	0.000855439
1153	106	193	T	40	157	193	131	3.67	4.52	1	ralt	TRUE	1.10886	4	0	FALSE	7.65264	-3.9761	9.18251	FALSE	FALSE	31	0.0611354	4.03185	4.87355	0.000889857
1154	106	194	A	80	138	154	91	3.9	4.71	1	ralt	TRUE	0.434	4	0	FALSE	-11.4742	-15.8663	1.2217	FALSE	FALSE	4	0.0608696	4.03814	4.86973	0.000381458
1155	106	195	O	80	0	168	107	4.18	4.48	1	ralt	TRUE	0.387201	4	0.117429	FALSE	13.379	-2.65366	8.22537	FALSE	FALSE	20	0.0735931	3.76429	4.8648	0.000342478
1156	106	196	T	40	157	193	131	5.26	3.62	1	ralt	TRUE	0.688305	4	0.120571	FALSE	1.64431	-10.8102	-0.156836	FALSE	FALSE	31	0.0646552	3.95109	4.86069	0.000327143
1157	106	197	O	80	0	168	107	3.5	5.4	1	ralt	TRUE	0.331464	4	0.132857	FALSE	-0.947318	-13.8386	6.03427	FALSE	FALSE	20	0.0772532	3.69426	4.85555	0.000316268
1158	106	198	O	80	3	121	112	4.4	3.74	0	lalt	TRUE	0.884553	4	0.126857	FALSE	-15.8272	-11.0208	16.9349	FALSE	FALSE	21	0.0128205	6.2854	4.86072	0.00104025
1159	106	199	A	80	3	121	112	4.09	3.78	0	lalt	TRUE	0.531727	4	0	FALSE	4.11642	9.36632	-6.68036	FALSE	FALSE	3	0.012766	6.29155	4.86588	0.00179074
1160	106	200	A	80	138	154	91	4.49	3.77	1	ralt	TRUE	0.674937	4	0	FALSE	9.9692	9.41363	-7.64153	FALSE	FALSE	4	0.0635593	3.97575	4.86193	0.00106442
1161	106	201	R	20	138	154	91	4.8	4.85	0	lalt	TRUE	1.05608	4	0	FALSE	-1.14852	-22.2621	5.07307	FALSE	FALSE	28	0.0168776	5.88874	4.86556	0.000847937
1162	106	202	T	40	75	124	89	4.78	4.69	0	ralt	FALSE	1.0231	4	0.382857	FALSE	0.670469	-6.17013	9.20232	FALSE	FALSE	35	0.0168067	5.89482	4.86918	0.00134624
1163	106	203	T	40	157	193	131	4.86	3.59	1	lalt	FALSE	1.12112	4	0.156	FALSE	20.1399	10.2415	-7.25499	FALSE	FALSE	31	0.0669456	3.90087	4.86498	0.000829288
1164	106	204	T	40	3	121	112	3.92	3.81	0	lalt	TRUE	0.617367	4	0	FALSE	-4.33828	-14.5902	8.1916	FALSE	FALSE	33	0.0125	6.32193	4.87013	0.00103564
1165	106	205	D	40	76	154	68	4.16	5.46	0	lalt	TRUE	0.607503	4	0	FALSE	6.16694	0.359841	-5.9751	FALSE	FALSE	6	0.0165975	5.91289	4.87376	0.00153889
1166	106	206	I	20	76	154	68	4.1	3.87	1	lalt	FALSE	0.653566	4	0.178857	FALSE	7.40969	1.05573	7.20519	FALSE	FALSE	12	0.0661157	3.91886	4.86966	0.000819667
1167	106	207	A	80	76	154	68	5.18	3.75	0	lalt	TRUE	0.41476	4	0.153714	FALSE	15.6561	17.6149	-19.0023	FALSE	FALSE	0	0.00823045	6.92481	4.87682	0.00141178
1168	106	208	A	80	138	154	91	5.36	4.1	1	ralt	TRUE	0.667889	4	0.144571	FALSE	8.01566	1.48746	-12.4083	FALSE	FALSE	4	0.0655738	3.93074	4.87279	0.00140622
1169	106	209	T	40	157	193	131	4.75	5.37	1	lalt	FALSE	0.960913	4	0.283714	FALSE	15.7323	1.83886	3.33675	FALSE	FALSE	31	0.0693878	3.84918	4.86847	0.000300829
1170	106	210	O	80	75	124	89	5.44	3.85	0	lalt	TRUE	0.839896	4	0.189143	FALSE	4.70886	14.4529	-1.1146	FALSE	FALSE	23	0.0121951	6.35755	4.87363	0.00100135
1171	106	211	O	80	76	154	68	5.19	4.97	0	lalt	TRUE	0.928999	4	0.101143	FALSE	3.35278	-9.44826	18.5055	FALSE	FALSE	18	0.0161943	5.94837	4.8773	0.00150283
1172	106	212	A	80	138	154	91	5.26	3.94	1	ralt	TRUE	0.320005	4	0.142286	FALSE	-11.768	-8.90906	-21.289	FALSE	FALSE	4	0.0685484	3.86673	4.87309	0.000790839
1173	106	213	A	80	138	154	91	3.61	4.39	1	ralt	TRUE	0.394071	4	0	FALSE	5.05839	-7.28136	-5.34597	FALSE	FALSE	4	0.0722892	3.79008	4.86861	0.000607341
1174	106	214	I	20	76	154	68	5.38	4.66	1	ralt	TRUE	0.797333	4	0.144286	FALSE	1.29366	-14.853	12.5032	FALSE	FALSE	12	0.068	3.87832	4.86451	0.000276572
1175	106	215	R	20	157	193	131	4.5	4.73	0	lalt	TRUE	1.0693	4	0.124571	FALSE	10.0174	2.43157	10.0016	FALSE	FALSE	25	0.0159363	5.97154	4.86825	0.000781978
1176	106	216	A	80	3	121	112	4.74	4.76	0	lalt	TRUE	0.480415	4	0	FALSE	2.91379	-4.74541	-6.25634	FALSE	FALSE	3	0.015873	5.97728	4.87199	0.00127441
1177	106	217	R	20	75	124	89	4.43	4.31	1	ralt	TRUE	0.831483	4	0	FALSE	-3.63806	10.1356	-10.6733	FALSE	FALSE	29	0.0750988	3.73507	4.86738	0.000759221
1178	106	218	I	20	76	154	68	5.2	4.04	1	ralt	TRUE	0.459612	4	0	FALSE	-6.51607	-9.7027	-0.624824	FALSE	FALSE	12	0.0708661	3.81876	4.86312	0.000256057
1179	106	219	O	80	75	124	89	3.99	4.27	0	lalt	TRUE	0.562715	4	0	FALSE	-3.7223	-4.37007	-1.45017	FALSE	FALSE	23	0.0156863	5.99435	4.8669	0.000761594
1180	106	220	D	40	3	121	112	4.04	5.2	1	ralt	TRUE	0.616886	4	0	FALSE	11.4664	37.9743	-9.67578	FALSE	FALSE	9	0.0703125	3.83007	4.86272	0.000758803
1181	106	221	T	40	157	193	131	4.63	4.9	1	lalt	FALSE	0.851948	4	0.674571	TRUE	8.44811	16.5534	4.86338	FALSE	FALSE	31	0.0700389	3.8357	4.8586	0.000261487
1182	106	222	A	80	138	154	91	5.34	5.23	1	ralt	TRUE	0.568026	4	0	FALSE	3.73693	-16.5798	2.21589	FALSE	FALSE	4	0.0736434	3.7633	4.85424	0.000252784
1183	106	223	I	20	76	154	68	3.94	4.51	1	ralt	TRUE	0.300049	4	0	FALSE	7.72492	5.45275	-12.5827	FALSE	FALSE	12	0.0733591	3.76888	4.84993	0.000244147
1184	106	224	R	20	75	124	89	4.34	5.06	1	ralt	TRUE	0.524194	4	0	FALSE	12.1948	6.66789	-3.0384	FALSE	FALSE	29	0.0769231	3.70044	4.8454	0.000236343
1185	106	225	A	80	138	154	91	4.93	4.98	1	ralt	TRUE	0.325267	4	0	FALSE	3.30015	-6.7551	0.979757	FALSE	FALSE	4	0.0766284	3.70598	4.84093	0.000228597
1186	106	226	A	80	76	154	68	5.09	5.21	0	lalt	TRUE	0.501318	4	0	FALSE	9.11328	3.2696	-4.51833	FALSE	FALSE	0	0.0114504	6.44846	4.84622	0.000919805
1187	106	227	I	20	76	154	68	4.2	4.45	1	ralt	TRUE	0.292331	4	0	FALSE	-3.48343	-21.8796	26.8154	FALSE	FALSE	12	0.0760456	3.71699	4.84182	0.00091648
1188	106	228	O	80	0	168	107	5.18	3.94	1	ralt	TRUE	0.26053	4	0.150857	FALSE	6.04966	5.85185	-16.7609	FALSE	FALSE	20	0.0719697	3.79647	4.83775	0.000233412
1189	106	229	I	20	157	193	131	4.58	5.28	0	lalt	TRUE	0.523652	4	0.127429	FALSE	5.7867	-24.2729	19.5033	FALSE	FALSE	13	0.0150943	6.04985	4.84169	0.000726917
1190	106	230	T	40	157	193	131	4.85	4.06	1	ralt	TRUE	1.01167	4	0	FALSE	3.41107	-7.15415	22.4085	FALSE	FALSE	31	0.0714286	3.80735	4.83768	0.000724348
1191	106	231	O	80	0	168	107	4.94	3.77	1	ralt	TRUE	0.420789	4	0.14	FALSE	5.99582	8.1626	-24.7606	FALSE	FALSE	20	0.0749064	3.73877	4.83346	0.000231258
1192	106	232	I	20	0	168	107	4.13	5.27	0	ralt	FALSE	0.245919	4	0.141714	FALSE	15.996	6.06298	-4.87403	FALSE	FALSE	14	0.0149254	6.06609	4.83743	0.00071244
1193	106	233	T	40	157	193	131	5.36	4.69	1	lalt	FALSE	0.950988	4	0.167714	FALSE	9.83005	-11.7069	15.7231	FALSE	FALSE	31	0.0743494	3.74953	4.83328	0.00070995
1194	106	234	T	40	3	121	112	4.79	5.13	0	lalt	TRUE	0.713024	4	0.148571	FALSE	0.644901	-16.167	-8.72141	FALSE	FALSE	33	0.0148148	6.07682	4.83726	0.000707478
1195	106	235	O	80	157	193	131	3.83	4.07	0	lalt	TRUE	0.673986	4	0	FALSE	-5.0032	-12.946	0.740213	FALSE	FALSE	19	0.0147601	6.08215	4.84124	0.00118835
1196	106	236	D	40	3	121	112	4.34	3.85	1	ralt	TRUE	0.262272	4	0	FALSE	3.41008	-3.11369	-10.325	FALSE	FALSE	9	0.0698529	3.83954	4.83744	0.000709307
1197	106	237	O	80	3	121	112	4.64	4.18	0	ralt	FALSE	0.274478	4	0.499143	TRUE	17.6013	3.2183	12.3414	FALSE	FALSE	21	0.014652	6.09276	4.84142	0.000706861
1198	106	238	A	80	76	154	68	5.29	4.9	0	lalt	TRUE	0.43361	4	0.142857	FALSE	8.46098	-17.7448	-4.28246	FALSE	FALSE	0	0.0145985	6.09803	4.84539	0.00117581
1199	106	239	D	40	3	121	112	4.92	5.45	1	ralt	TRUE	0.479646	4	0	FALSE	1.77642	-12.6201	5.55355	FALSE	FALSE	9	0.0727273	3.78136	4.84142	0.000695367
1200	107	0	D	80	138	154	91	4.64	5.44	1	ralt	FALSE	0.795299	1	0.124286	FALSE	6.7877	-22.2613	16.3181	FALSE	FALSE	10	0.0277778	5.16993	5.1554	0.0145257
1201	107	1	A	40	75	124	89	4.36	4.97	0	ralt	TRUE	1.26732	1	0.326	FALSE	4.32175	-6.83213	-0.851788	FALSE	FALSE	5	0.027027	5.20945	5.14266	0.0272606
1202	107	2	D	80	76	154	68	4.08	5.07	0	ralt	TRUE	0.520279	1	0.108571	FALSE	-0.254964	-6.3924	0.504101	FALSE	FALSE	6	0.0263158	5.24793	5.13156	0.0266152
1203	107	3	D	80	3	121	112	4.61	5.07	0	ralt	TRUE	0.384468	1	0.110857	FALSE	2.28012	-1.0423	-1.18038	FALSE	FALSE	9	0.025641	5.2854	5.12193	0.0259994
1204	107	4	O	20	75	124	89	5.16	4.56	1	ralt	FALSE	0.580524	1	0.213714	FALSE	4.37391	29.8082	-1.67518	FALSE	FALSE	23	0.025	5.32193	5.11365	0.0254112
1205	107	5	A	40	138	154	91	5.15	5.41	0	ralt	TRUE	0.158591	1	0.121429	FALSE	6.47176	-0.845785	3.15922	FALSE	FALSE	4	0.0243902	5.35755	5.1066	0.0248488
1206	107	6	T	40	3	121	112	4.26	4.22	0	ralt	TRUE	0.932535	1	0.107429	FALSE	8.2575	0.681336	-5.48637	FALSE	FALSE	33	0.0238095	5.39232	5.10068	0.0243105
1207	107	7	R	80	0	168	107	4.16	5.32	1	ralt	FALSE	0.390699	1	0.109714	FALSE	2.48061	-12.5257	-4.13818	FALSE	FALSE	26	0.0232558	5.42626	5.0958	0.0237949
1208	107	8	D	80	138	154	91	4.05	3.58	1	ralt	FALSE	0.310824	1	0.127143	FALSE	7.35217	2.34328	-3.77035	FALSE	FALSE	10	0.0454545	4.45943	5.07508	0.0178536
1209	107	9	T	40	3	121	112	4.95	3.57	0	ralt	TRUE	0.50801	1	0.118	FALSE	0.873477	8.04363	0.199084	FALSE	FALSE	33	0.0444444	4.49185	5.05596	0.0121691
1210	107	10	O	20	75	124	89	4.02	4.22	1	ralt	FALSE	0.63816	1	0.0574286	FALSE	-2.34858	-3.87262	0.20052	FALSE	FALSE	23	0.0434783	4.52356	5.03832	0.0119403
1211	107	11	O	20	157	193	131	4.52	4.79	0	ralt	TRUE	0.425329	1	0.234857	FALSE	3.25203	-1.7228	2.00225	FALSE	FALSE	19	0.0212766	5.55459	5.03778	0.0168263
1212	107	12	D	80	75	124	89	5.22	3.89	0	lalt	FALSE	0.535364	1	0.116286	FALSE	1.6369	-23.5042	15.976	FALSE	FALSE	11	0.0208333	5.58496	5.03788	0.0215117
1213	107	13	D	80	3	121	112	4.93	5.41	0	ralt	TRUE	0.151535	1	0.342571	FALSE	1.06032	8.89002	-5.39577	FALSE	FALSE	9	0.0408163	4.61471	5.02347	0.0162041
1214	107	14	R	80	0	168	107	5.11	4.34	1	lalt	TRUE	0.314517	1	0.116571	FALSE	6.98994	-4.05109	2.93309	FALSE	FALSE	26	0.04	4.64386	5.01018	0.0111036
1215	107	15	T	40	157	193	131	5.21	4.41	1	ralt	FALSE	0.394632	1	0.124286	FALSE	11.2368	-1.95041	-0.545711	FALSE	FALSE	31	0.0196078	5.67243	5.01247	0.0156258
1216	107	16	I	20	76	154	68	3.7	5.13	1	ralt	FALSE	0.796632	1	0.0525714	FALSE	6.48343	-9.95206	1.32104	FALSE	FALSE	12	0.0192308	5.70044	5.0152	0.0199766
1217	107	17	D	80	75	124	89	4.94	5.43	0	ralt	TRUE	1.06575	1	0.108286	FALSE	-0.441593	2.9447	9.80454	FALSE	FALSE	11	0.0377358	4.72792	5.00434	0.0150872
1218	107	18	I	20	138	154	91	5.09	4.01	0	ralt	TRUE	0.218768	1	0	FALSE	-3.3427	-4.72209	-3.0046	FALSE	FALSE	16	0.0185185	5.75489	5.0081	0.0148314
1219	107	19	T	40	76	154	68	5.01	4.24	0	ralt	TRUE	0.187806	1	0	FALSE	7.61664	2.7836	-3.82004	FALSE	FALSE	30	0.0181818	5.78136	5.01219	0.0189612
1220	107	20	I	20	75	124	89	3.63	5.33	0	ralt	TRUE	0.380962	1	0	FALSE	5.35556	3.22401	-5.63611	FALSE	FALSE	17	0.0178571	5.80735	5.01659	0.0186451
1221	107	21	A	40	0	168	107	4.44	5.45	0	ralt	TRUE	0.238148	1	0.132	FALSE	0.633077	14.6463	9.3488	FALSE	FALSE	2	0.0175439	5.83289	5.02127	0.0183394
1222	107	22	O	20	76	154	68	3.92	5.12	0	ralt	TRUE	0.972122	1	0.111429	FALSE	5.10249	-0.533022	0.391278	FALSE	FALSE	18	0.0172414	5.85798	5.02621	0.0180436
1223	107	23	I	20	76	154	68	5.49	3.78	1	ralt	FALSE	0.289244	1	0.328	FALSE	-2.88341	-10.4035	1.49855	FALSE	FALSE	12	0.0338983	4.88264	5.01882	0.0136719
1224	107	24	A	40	76	154	68	5.49	4.94	0	lalt	FALSE	0.890312	1	0	FALSE	9.54637	2.78137	0.0828453	FALSE	FALSE	0	0.0166667	5.90689	5.02444	0.0134612
1225	107	25	O	20	157	193	131	5.45	4.23	0	lalt	FALSE	0.847258	1	0.112857	FALSE	-1.48093	-2.81257	-3.03941	FALSE	FALSE	19	0.0327869	4.93074	5.01808	0.013257
1226	107	26	T	40	0	168	107	4.3	4.5	0	ralt	TRUE	0.940303	1	0.196857	FALSE	6.36431	-13.0857	14.6401	FALSE	FALSE	32	0.016129	5.9542	5.02428	0.0130588
1227	107	27	O	20	157	193	131	4.89	4.12	0	ralt	TRUE	0.829401	1	0	FALSE	-2.01078	-2.2877	7.6524	FALSE	FALSE	19	0.047619	4.39232	5.01118	0.0113862
1228	107	28	I	20	76	154	68	4.36	3.88	1	ralt	FALSE	0.166524	1	0.172286	FALSE	-0.384101	1.05165	-3.89298	FALSE	FALSE	12	0.046875	4.41504	4.99884	0.00599365
1229	107	29	I	20	157	193	131	5.3	3.64	0	missing	FALSE		1	0	FALSE	-0.0125912	-8.0052	-1.08729	TRUE	TRUE	13	0.0153846	6.02237	5.00607	0.0110627
1230	107	30	D	80	138	154	91	3.74	3.52	1	ralt	FALSE	0.990613	1	0.112	FALSE	3.02639	-17.8299	17.1963	FALSE	FALSE	10	0.0454545	4.45943	4.99483	0.0109077
1231	107	31	A	40	138	154	91	5.32	4.46	0	ralt	TRUE	0.719824	1	0	FALSE	-0.0313398	-1.07316	2.52301	FALSE	FALSE	4	0.0298507	5.06609	4.99144	0.00715242
1232	107	32	A	40	3	121	112	4.97	4.43	1	lalt	TRUE	1.44582	1	0	FALSE	2.69555	-4.90895	-1.43409	FALSE	FALSE	3	0.0147059	6.08746	4.9994	0.0119834
1233	107	33	A	40	3	121	112	4.37	5.25	1	lalt	TRUE	0.353906	1	0.114	FALSE	14.5904	-45.1466	35.7238	FALSE	FALSE	3	0.0289855	5.10852	4.99665	0.0261068
1234	107	34	T	40	75	124	89	4.78	4.72	0	lalt	FALSE	0.53397	1	0.211143	FALSE	2.12563	-6.2318	-5.58589	FALSE	FALSE	35	0.0142857	6.12928	5.0049	0.0116631
1235	107	35	O	20	75	124	89	5.47	3.51	1	lalt	TRUE	0.858982	1	0.122	FALSE	34.3109	1.93067	-5.62645	FALSE	FALSE	23	0.0422535	4.56478	4.99591	0.0101934
1236	107	36	O	20	75	124	89	3.57	5.32	1	lalt	TRUE	0.195065	1	0	FALSE	2.8937	-1.90962	11.8211	FALSE	FALSE	23	0.0555556	4.16993	4.98244	0.0103997
1237	107	37	O	20	75	124	89	4.39	4.6	1	lalt	TRUE	0.110281	1	0	FALSE	9.29997	8.17971	-4.85518	FALSE	FALSE	23	0.0684932	3.8679	4.96568	0.00790103
1238	107	38	D	80	157	193	131	5.35	4.2	0	ralt	TRUE	0.250416	1	0	FALSE	-3.75786	-2.45012	9.27038	FALSE	FALSE	7	0.0135135	6.20945	4.97496	0.00871529
1239	107	39	R	80	75	124	89	5.06	3.93	0	ralt	TRUE	0.0915073	1	0	FALSE	4.65836	3.39934	-5.73143	FALSE	FALSE	29	0.0133333	6.22882	4.98426	0.0141574
1240	107	40	R	80	0	168	107	4.74	4.7	1	ralt	FALSE	0.203637	1	0.129143	FALSE	-0.265082	4.11344	-12.3967	FALSE	FALSE	26	0.0394737	4.66297	4.97738	0.00956657
1241	107	41	R	80	0	168	107	4.54	4.5	1	ralt	FALSE	0.660701	1	0.379429	FALSE	-16.6055	-38.4659	39.5476	FALSE	FALSE	26	0.0519481	4.26679	4.96625	0.00976668
1242	107	42	R	80	0	168	107	5.35	5.23	1	lalt	TRUE	0.362796	1	0	FALSE	0.360361	-15.8969	16.2969	FALSE	FALSE	26	0.0641026	3.96347	4.95196	0.00743332
1243	107	43	T	40	157	193	131	3.62	3.51	1	ralt	FALSE	0.623791	1	0.114286	FALSE	5.74493	4.99006	-8.78917	FALSE	FALSE	31	0.0253165	5.30378	4.95257	0.0051378
1244	107	44	O	20	75	124	89	3.81	5.12	1	ralt	FALSE	0.0340782	1	0.545714	TRUE	17.5021	5.18432	0.4204	FALSE	FALSE	23	0.075	3.73697	4.93626	0.00481512
1245	107	45	A	40	157	193	131	3.52	5.02	0	ralt	TRUE	0.282201	1	0.124	FALSE	-2.38154	37.0453	-2.68761	FALSE	FALSE	1	0.0123457	6.33985	4.94669	0.00775105
1246	107	46	I	20	3	121	112	4.34	4.91	0	ralt	TRUE	0.0553956	1	0.122286	FALSE	3.98117	-3.88111	-3.016	FALSE	FALSE	15	0.0121951	6.35755	4.95708	0.0130033
1247	107	47	D	80	138	154	91	4.49	5.07	1	ralt	FALSE	0.0105148	1	0.205429	FALSE	-1.61568	-0.0324902	-1.17418	FALSE	FALSE	10	0.0481928	4.37504	4.94827	0.00820649
1248	107	48	T	40	157	193	131	5.35	4.17	1	ralt	FALSE	0.678568	1	0.120571	FALSE	11.2201	2.48593	-4.00118	FALSE	FALSE	31	0.0357143	4.80735	4.94415	0.00411662
1249	107	49	T	40	138	154	91	4.26	4.02	0	ralt	TRUE	0.615602	1	0.215143	FALSE	3.21257	0.55255	1.27175	FALSE	FALSE	34	0.0117647	6.40939	4.95481	0.00861255
1250	107	50	A	40	3	121	112	4.01	3.99	1	lalt	TRUE	0.575844	1	0.0282857	FALSE	-4.58691	-7.31303	1.97319	FALSE	FALSE	3	0.0348837	4.8413	4.9511	0.00851813
1251	107	51	I	20	76	154	68	4.89	5.45	1	ralt	FALSE	0.669971	1	0.127714	FALSE	6.56899	-6.37074	-0.520338	FALSE	FALSE	12	0.045977	4.44294	4.94352	0.00398985
1252	107	52	O	20	75	124	89	3.74	5	1	lalt	TRUE	0.547946	1	0.374857	FALSE	5.55575	6.88846	6.16328	FALSE	FALSE	23	0.0795455	3.65208	4.928	0.00261232
1253	107	53	R	80	76	154	68	4.93	4.89	0	ralt	TRUE	0.568072	1	0.128571	FALSE	-1.60218	-2.33243	-4.8635	FALSE	FALSE	24	0.011236	6.47573	4.93909	0.00692475
1254	107	54	A	40	138	154	91	3.86	4.26	0	missing	FALSE		1	0.122	FALSE	34.1237	30.9178	-3.60973	TRUE	TRUE	4	0.0333333	4.90689	4.93644	0.00816022
1255	107	55	R	80	0	168	107	5.32	5.02	1	ralt	FALSE	0.24714	1	0.124857	FALSE	3.09566	-0.594134	-2.1785	FALSE	FALSE	26	0.0659341	3.92283	4.92426	0.00325741
1256	107	56	D	80	138	154	91	4.02	3.91	1	ralt	FALSE	0.207181	1	0.111143	FALSE	3.1675	3.86535	-10.2228	FALSE	FALSE	10	0.0543478	4.20163	4.91512	0.00234501
1257	107	57	A	40	3	121	112	5.08	3.93	1	ralt	FALSE	0.256404	1	0.110857	FALSE	7.25296	-3.25084	1.26444	FALSE	FALSE	3	0.0430108	4.53916	4.90943	0.00288637
1258	107	58	I	20	76	154	68	3.65	4.72	1	lalt	TRUE	0.832482	1	0.395429	FALSE	-2.82839	0.858296	-5.54325	FALSE	FALSE	12	0.0531915	4.23266	4.90096	0.00285949
1259	107	59	A	40	3	121	112	5.39	5.01	1	lalt	TRUE	0.295647	1	0.129143	FALSE	2.50211	-1.59064	-13.0652	FALSE	FALSE	3	0.0526316	4.24793	4.89282	0.00250565
1260	107	60	O	20	75	124	89	4.99	3.84	1	ralt	FALSE	0.443744	2	0.118571	FALSE	4.50791	-19.2526	20.4434	FALSE	FALSE	23	0.0833333	3.58496	4.87852	0.00197917
1261	107	61	I	20	76	154	68	4.88	4.5	1	ralt	FALSE	0.335837	2	0.120286	FALSE	0.593176	0.440895	-1.93659	FALSE	FALSE	12	0.0618557	4.01495	4.86862	0.00174319
1262	107	62	T	40	157	193	131	4.77	4.39	1	ralt	FALSE	0.460989	2	0.242571	FALSE	9.24073	10.9362	-12.5918	FALSE	FALSE	31	0.0408163	4.61471	4.86445	0.00253993
1263	107	63	R	80	3	121	112	5.21	5.42	0	missing	FALSE		2	0.124857	FALSE	-0.726177	-1.05228	2.14089	TRUE	TRUE	27	0.010101	6.62936	4.87659	0.00695006
1264	107	64	R	80	157	193	131	5.2	4.69	0	ralt	TRUE	0.894854	2	0.122571	FALSE	3.25665	1.31782	0.16304	FALSE	FALSE	25	0.01	6.64386	4.88865	0.0107491
1265	107	65	T	40	157	193	131	5.44	3.64	1	ralt	FALSE	0.172917	2	0.192571	FALSE	-1.34625	-6.68319	3.7506	FALSE	FALSE	31	0.049505	4.33628	4.88197	0.0065113
1266	107	66	T	40	3	121	112	4.18	3.68	0	ralt	TRUE	0.0970732	2	0.243714	FALSE	0.369773	0.547597	-0.98859	FALSE	FALSE	33	0.0294118	5.08746	4.88192	0.00315131
1267	107	67	D	80	157	193	131	4.52	5.08	0	ralt	TRUE	0.110293	2	0.106571	FALSE	-1.30751	3.55931	-2.09075	FALSE	FALSE	7	0.0194175	5.6865	4.88673	0.00482252
1268	107	68	O	20	75	124	89	5.02	5.08	1	missing	FALSE		2	0.0968571	FALSE	6.14323	-9.23246	14.6983	TRUE	TRUE	23	0.0865385	3.53051	4.87314	0.00344471
1269	107	69	A	40	3	121	112	4.66	4.51	1	ralt	FALSE	0.349216	2	0	FALSE	-8.66744	-15.6587	5.54874	FALSE	FALSE	3	0.0571429	4.12928	4.86511	0.00154547
1270	107	70	D	80	157	193	131	4.98	4.28	0	lalt	FALSE	0.66129	2	0.118571	FALSE	-4.25594	-1.46714	0.14824	FALSE	FALSE	7	0.0283019	5.14296	4.86574	0.00284299
1271	107	71	D	80	138	154	91	4.32	3.82	1	lalt	TRUE	0.483392	2	0	FALSE	0.122904	-17.1642	10.231	FALSE	FALSE	10	0.0560748	4.1565	4.85818	0.00281904
1272	107	72	O	20	76	154	68	4.85	5.44	0	ralt	TRUE	0.744568	2	0.116	FALSE	-1.4068	0.0785163	-1.12429	FALSE	FALSE	18	0.0185185	5.75489	4.8636	0.00366463
1273	107	73	O	20	0	168	107	4.6	3.61	0	ralt	TRUE	0.0785831	2	0	FALSE	-1.4653	-4.51032	9.65879	FALSE	FALSE	20	0.00917431	6.76818	4.87591	0.00766313
1274	107	74	O	20	138	154	91	4.82	5.03	0	ralt	TRUE	0.093806	2	0.115429	FALSE	2.44144	5.63575	-4.38769	FALSE	FALSE	22	0.00909091	6.78136	4.88811	0.00980449
1275	107	75	T	40	157	193	131	4.9	4.13	1	ralt	FALSE	0.146878	2	0.126286	FALSE	9.02971	-1.82575	-3.34427	FALSE	FALSE	31	0.0540541	4.20945	4.88109	0.00576146
1276	107	76	A	40	3	121	112	3.7	4.45	1	lalt	TRUE	0.618943	2	0	FALSE	-4.25086	-13.0836	4.86851	FALSE	FALSE	3	0.0625	4	4.87248	0.00165202
1277	107	77	O	20	75	124	89	3.87	4.11	1	ralt	FALSE	0.127181	2	0.122857	FALSE	2.51448	-2.12072	-0.284473	FALSE	FALSE	23	0.0884956	3.49825	4.85987	0.00125174
1278	107	78	D	80	138	154	91	4.59	4.75	1	lalt	TRUE	0.249376	2	0.127714	FALSE	7.276	2.25479	-5.75088	FALSE	FALSE	10	0.0614035	4.02554	4.85181	0.00124282
1279	107	79	T	40	0	168	107	3.58	4.46	0	ralt	TRUE	0.60446	2	0	FALSE	10.0217	-3.25819	-2.40487	FALSE	FALSE	32	0.0173913	5.84549	4.85774	0.00332323
1280	107	80	O	20	0	168	107	4.9	4.85	0	ralt	TRUE	0.44863	2	0.112	FALSE	6.86522	-4.21575	5.6217	FALSE	FALSE	20	0.0172414	5.85798	4.86368	0.00512341
1281	107	81	D	80	0	168	107	5.3	4.42	0	ralt	TRUE	0.318702	2	0.124571	FALSE	-1.14365	-7.14168	3.49544	FALSE	FALSE	8	0.00854701	6.87036	4.87601	0.00715903
1282	107	82	R	80	0	168	107	5.39	5.02	1	ralt	FALSE	0.351773	2	0.115143	FALSE	7.53562	-12.2775	7.28307	FALSE	FALSE	26	0.059322	4.07529	4.86851	0.00530461
1283	107	83	O	20	3	121	112	3.57	3.98	0	ralt	TRUE	0.73074	2	0.126	FALSE	7.02256	1.66666	-0.858326	FALSE	FALSE	21	0.00840336	6.89482	4.8808	0.00526213
1284	107	84	A	40	3	121	112	3.69	3.78	1	lalt	TRUE	0.265983	2	0.118571	FALSE	1.1545	4.38857	-7.61151	FALSE	FALSE	3	0.0666667	3.90689	4.87208	0.0051225
1285	107	85	D	80	157	193	131	5.12	3.94	0	ralt	TRUE	0.2372	2	0.116286	FALSE	0.915864	-10.6491	-5.28861	FALSE	FALSE	7	0.0330579	4.91886	4.87115	0.00188248
1286	107	86	T	40	157	193	131	4.21	4.99	1	ralt	FALSE	0.672453	2	0.220857	FALSE	-0.768055	-6.18915	0.961216	FALSE	FALSE	31	0.057377	4.12338	4.86431	0.001965
1287	107	87	T	40	75	124	89	5.09	4.61	0	ralt	TRUE	0.411404	2	0.230857	FALSE	19.2405	-25.7507	34.4835	FALSE	FALSE	35	0.0162602	5.94251	4.87054	0.00312206
1288	107	88	A	40	138	154	91	4.38	4.87	0	ralt	TRUE	0.29047	2	0.114	FALSE	9.06101	3.28333	5.41877	FALSE	FALSE	4	0.0322581	4.9542	4.86992	0.00364644
1289	107	89	D	80	75	124	89	4.26	5.25	0	lalt	FALSE	0.394581	2	0.122857	FALSE	1.01809	-16.6849	8.31939	FALSE	FALSE	11	0.024	5.38082	4.87229	0.0028671
1290	107	90	T	40	157	193	131	4.35	4.4	1	lalt	TRUE	0.761642	2	0.127429	FALSE	-1.18294	-4.64979	-1.52015	FALSE	FALSE	31	0.0634921	3.97728	4.86461	0.00221357
1291	107	91	I	20	76	154	68	5.32	5.04	1	ralt	FALSE	0.260758	2	0.114857	FALSE	11.9653	-11.5382	0.570186	FALSE	FALSE	12	0.0551181	4.18133	4.85855	0.00126809
1292	107	92	D	80	138	154	91	5.03	4.6	1	lalt	TRUE	0.501755	2	0.125429	FALSE	-4.78708	-5.86795	5.55184	FALSE	FALSE	10	0.0625	4	4.85126	0.00125965
1293	107	93	O	20	0	168	107	4.98	5.2	0	ralt	TRUE	0.831787	2	0.124	FALSE	2.14418	1.65993	6.69781	FALSE	FALSE	20	0.0232558	5.42626	4.85406	0.00216661
1294	107	94	R	80	0	168	107	3.62	3.87	1	ralt	FALSE	0.79779	2	0.132571	FALSE	16.5923	8.2779	-13.8205	FALSE	FALSE	26	0.0615385	4.02237	4.84709	0.00215139
1295	107	95	T	40	76	154	68	4.23	3.99	0	ralt	TRUE	0.484016	2	0.121714	FALSE	-1.80791	0.168432	0.311063	FALSE	FALSE	30	0.0152672	6.03342	4.85375	0.00285409
1296	107	96	R	80	0	168	107	5	4	1	ralt	FALSE	0.423271	2	0.0657143	FALSE	8.01009	-7.78564	-3.87095	FALSE	FALSE	26	0.0681818	3.87447	4.84585	0.00276401
1297	107	97	A	40	75	124	89	3.68	4.76	0	ralt	TRUE	0.384326	2	0.108857	FALSE	10.7275	7.36468	4.39688	FALSE	FALSE	5	0.0150376	6.05528	4.85258	0.00274462
1298	107	98	I	20	157	193	131	4.82	4.16	0	ralt	TRUE	0.725454	2	0	FALSE	4.30835	-11.4742	12.0229	FALSE	FALSE	13	0.0149254	6.06609	4.8593	0.00446517
1299	107	99	O	20	3	121	112	4.79	4.33	0	ralt	TRUE	0.476494	2	0.458571	TRUE	0.298636	-10.9509	-8.32863	FALSE	FALSE	21	0.0148148	6.07682	4.866	0.00443352
1300	107	100	T	40	157	193	131	5.33	3.87	1	ralt	FALSE	0.774624	2	0.250857	FALSE	0.313257	-0.622107	-0.179425	FALSE	FALSE	31	0.0661765	3.91754	4.85855	0.00268803
1301	107	101	R	80	3	121	112	5.2	3.53	0	ralt	TRUE	0.789686	2	0.475429	TRUE	10.457	2.89107	-2.81381	FALSE	FALSE	27	0.0145985	6.09803	4.86531	0.00266968
1302	107	102	D	80	138	154	91	4.79	3.96	1	lalt	TRUE	0.423817	2	0.854286	TRUE	-1.00552	2.14548	-4.12901	FALSE	FALSE	10	0.0652174	3.9386	4.85812	0.00265157
1303	107	103	R	80	157	193	131	3.54	4.28	0	lalt	FALSE	0.619948	2	0	FALSE	1.03664	-7.63899	8.88277	FALSE	FALSE	25	0.0143885	6.11894	4.86493	0.00263371
1304	107	104	I	20	157	193	131	3.64	4.57	0	ralt	TRUE	0.701145	2	0.228	FALSE	-11.7473	10.4293	-6.36872	FALSE	FALSE	13	0.0214286	5.54432	4.86825	0.00360984
1305	107	105	I	20	138	154	91	4.55	3.5	0	ralt	TRUE	0.624252	2	0.170286	FALSE	14.732	8.94161	-10.8863	FALSE	FALSE	16	0.0141844	6.13955	4.87504	0.00358546
1306	107	106	I	20	76	154	68	4.56	4.67	1	lalt	TRUE	0.847447	2	0.118286	FALSE	2.64066	-3.85472	5.86312	FALSE	FALSE	12	0.056338	4.14975	4.86939	0.00264654
1307	107	107	R	80	76	154	68	3.55	4.89	0	lalt	FALSE	0.634544	2	0.248286	FALSE	-6.70741	-24.9502	15.4031	FALSE	FALSE	24	0.013986	6.15987	4.87622	0.00262915
1308	107	108	I	20	0	168	107	5.09	5.09	0	ralt	TRUE	0.375697	2	0.280571	FALSE	-7.08982	-21.209	13.2902	FALSE	FALSE	14	0.00694444	7.16993	4.88823	0.00585802
1309	107	109	I	20	0	168	107	4.36	4.71	0	lalt	FALSE	0.471713	2	0.117714	FALSE	11.412	7.32829	-11.2277	FALSE	FALSE	14	0.0137931	6.17991	4.89497	0.0126682
1310	107	110	D	80	138	154	91	4.4	5.05	1	lalt	TRUE	0.876799	2	0.248571	FALSE	-9.94953	-13.0398	3.05395	FALSE	FALSE	10	0.0684932	3.8679	4.88755	0.00246413
1311	107	111	A	40	3	121	112	4.96	4.95	1	lalt	TRUE	0.246883	2	0.122286	FALSE	23.097	-6.19119	14.0916	FALSE	FALSE	3	0.0612245	4.02975	4.88126	0.000861529
1312	107	112	I	20	76	154	68	4.49	3.76	1	lalt	TRUE	0.313909	2	0.227429	FALSE	13.2171	-2.48344	6.1884	FALSE	FALSE	12	0.0608108	4.03953	4.87512	0.000906924
1313	107	113	D	80	138	154	91	3.89	5.14	1	lalt	TRUE	0.285085	2	0.116286	FALSE	6.64716	4.74807	-11.5573	FALSE	FALSE	10	0.0738255	3.75974	4.8673	0.000810685
1314	107	114	A	40	3	121	112	5.4	4.42	1	lalt	TRUE	0.300225	2	0.356286	FALSE	0.0351958	2.10077	-7.76189	FALSE	FALSE	3	0.0666667	3.90689	4.86051	0.000756558
1315	107	115	O	20	0	168	107	3.64	4.44	0	lalt	FALSE	0.573251	2	0.317714	FALSE	4.8736	5.7712	-6.88137	FALSE	FALSE	20	0.0264901	5.2384	4.86192	0.00143183
1316	107	116	A	40	3	121	112	4.98	4.03	1	lalt	TRUE	0.185457	2	0.0325714	FALSE	8.51664	6.63152	-8.25481	FALSE	FALSE	3	0.0723684	3.7885	4.85452	0.00138298
1317	107	117	I	20	76	154	68	4.05	4.1	1	lalt	TRUE	0.341571	2	0.178286	FALSE	-0.676678	-16.2247	21.958	FALSE	FALSE	12	0.0653595	3.93546	4.84813	0.00074428
1318	107	118	R	80	75	124	89	5.29	4.42	0	lalt	FALSE	0.624774	2	0.118857	FALSE	-7.59317	-17.8351	11.7182	FALSE	FALSE	29	0.012987	6.26679	4.8553	0.00234361
1319	107	119	T	40	157	193	131	4.85	4.04	1	lalt	TRUE	0.969799	2	0.17	FALSE	-1.85477	-3.81449	-6.15621	FALSE	FALSE	31	0.0645161	3.9542	4.84911	0.00232936
1320	107	120	A	40	3	121	112	5.18	5.09	1	lalt	TRUE	0.207045	3	0.236286	FALSE	4.63907	-4.46825	3.1962	FALSE	FALSE	3	0.0769231	3.70044	4.84145	0.000699469
1321	107	121	I	20	76	154	68	5.34	4.68	1	lalt	TRUE	0.650051	3	0.117143	FALSE	-3.46463	-10.8095	14.5592	FALSE	FALSE	12	0.0700637	3.83519	4.8347	0.000656752
1322	107	122	D	80	138	154	91	3.99	4.36	1	lalt	TRUE	0.294126	3	0.118571	FALSE	-7.21215	-3.12656	-8.05496	FALSE	FALSE	10	0.0759494	3.71882	4.82735	0.000653356
1323	107	123	O	20	138	154	91	5.16	4.18	0	ralt	TRUE	0.55926	3	0.116571	FALSE	9.15737	-1.52512	5.04266	FALSE	FALSE	22	0.0125786	6.31288	4.83471	0.00220322
1324	107	124	T	40	0	168	107	4.77	4.44	0	ralt	TRUE	0.333338	3	0.305143	FALSE	4.67487	-14.6645	5.56796	FALSE	FALSE	32	0.01875	5.73697	4.83899	0.00317749
1325	107	125	D	80	138	154	91	5.18	4.55	1	lalt	TRUE	0.306472	3	0	FALSE	4.5975	-1.61314	-1.3859	FALSE	FALSE	10	0.0807453	3.63048	4.83122	0.00156552
1326	107	126	A	40	0	168	107	4.91	3.69	0	ralt	TRUE	0.300482	3	0.609429	TRUE	13.1778	-2.43187	-11.4854	FALSE	FALSE	2	0.0123457	6.33985	4.83859	0.00213781
1327	107	127	I	20	75	124	89	4.43	5.28	0	lalt	FALSE	0.545673	3	0.247714	FALSE	5.14896	-4.2777	13.2238	FALSE	FALSE	17	0.0122699	6.34873	4.84592	0.00369907
1328	107	128	I	20	76	154	68	3.63	5.42	1	lalt	TRUE	0.437722	3	0.154	FALSE	7.86335	2.22351	-4.95175	FALSE	FALSE	12	0.0731707	3.77259	4.83909	0.00213983
1329	107	129	O	20	75	124	89	3.8	5.12	1	lalt	TRUE	0.784816	3	0.199714	FALSE	5.21899	-7.27015	5.4788	FALSE	FALSE	23	0.0666667	3.90689	4.83312	0.000630491
1330	107	130	D	80	76	154	68	4.52	5.05	0	ralt	TRUE	0.406923	3	0.108857	FALSE	-0.163062	-1.41684	0.76	FALSE	FALSE	6	0.0120482	6.37504	4.84051	0.00214641
1331	107	131	T	40	157	193	131	4.96	3.53	1	lalt	TRUE	0.934954	3	0.136	FALSE	-10.2206	-13.2957	10.29	FALSE	FALSE	31	0.0658683	3.92427	4.8347	0.00213426
1332	107	132	O	20	75	124	89	5.5	4.23	1	lalt	TRUE	0.732064	3	0.221143	FALSE	7.9316	-0.0503115	-0.826541	FALSE	FALSE	23	0.0714286	3.80735	4.8283	0.000621154
1333	107	133	I	20	76	154	68	4.12	4.16	1	lalt	TRUE	0.768115	3	0.420571	TRUE	-6.26608	-10.8481	7.33061	FALSE	FALSE	12	0.0769231	3.70044	4.82137	0.000561879
1334	107	134	A	40	3	121	112	5.06	4.86	1	lalt	TRUE	0.233293	3	0.233714	FALSE	10.0933	9.81499	-6.26108	FALSE	FALSE	3	0.0764706	3.70895	4.81457	0.000533504
1335	107	135	O	20	75	124	89	3.71	4.15	1	lalt	TRUE	0.537312	3	0.251714	FALSE	5.15797	-2.19538	3.39525	FALSE	FALSE	23	0.0760234	3.71741	4.80791	0.000530982
1336	107	136	R	80	138	154	91	4.26	4.05	0	lalt	FALSE	1.53646	3	0.131714	FALSE	7.4908	-6.37566	6.27904	FALSE	FALSE	28	0.00581395	7.42626	4.81984	0.00343708
1337	107	137	I	20	3	121	112	5.35	4.18	0	ralt	TRUE	0.512586	3	0.129429	FALSE	22.0515	-9.63193	3.82896	FALSE	FALSE	15	0.0115607	6.43463	4.82735	0.00490107
1338	107	138	A	40	0	168	107	4.94	4.92	0	ralt	TRUE	0.318686	3	0.332286	FALSE	8.65381	-2.84198	4.04321	FALSE	FALSE	2	0.0172414	5.85798	4.83202	0.00293162
1339	107	139	R	80	0	168	107	4.99	4.05	1	lalt	TRUE	0.529735	3	0.132571	FALSE	6.74363	4.46972	-3.96618	FALSE	FALSE	26	0.0571429	4.12928	4.82766	0.00153852
1340	107	140	T	40	157	193	131	4.71	4.63	1	lalt	TRUE	0.650831	3	0.255714	FALSE	6.8458	3.85559	-5.49123	FALSE	FALSE	31	0.0681818	3.87447	4.82196	0.000632356
1341	107	141	T	40	157	193	131	5.04	4.11	1	lalt	TRUE	0.280926	3	0.222571	FALSE	12.5066	9.3026	-7.69572	FALSE	FALSE	31	0.0734463	3.76717	4.81576	0.00118973
1342	107	142	T	40	157	193	131	5.09	4.52	1	lalt	TRUE	0.262048	3	0.363714	FALSE	11.3434	3.38991	-8.76383	FALSE	FALSE	31	0.0786517	3.66838	4.80909	0.00109013
1343	107	143	O	20	75	124	89	4.43	4.04	1	lalt	TRUE	1.01006	3	0.304571	FALSE	2.9788	-4.73645	-3.10831	FALSE	FALSE	23	0.0782123	3.67646	4.80254	0.000469614
1344	107	144	D	80	76	154	68	3.59	5.19	0	lalt	FALSE	0.457189	3	0.167429	FALSE	-1.70448	-9.23198	26.6214	FALSE	FALSE	6	0.0166667	5.90689	4.80746	0.0013908
1345	107	145	T	40	157	193	131	3.89	4.75	1	lalt	TRUE	0.274268	3	0.237143	FALSE	2.18203	2.09705	1.19926	FALSE	FALSE	31	0.0828729	3.59296	4.80055	0.0013656
1346	107	146	R	80	0	168	107	4.11	4.64	1	lalt	TRUE	0.445476	3	0.117143	FALSE	-6.16375	-6.99474	10.2311	FALSE	FALSE	26	0.0604396	4.04836	4.79611	0.000518295
1347	107	147	I	20	138	154	91	3.88	4.77	0	ralt	TRUE	1.03555	3	0.213714	FALSE	3.37688	-0.827964	0.493409	FALSE	FALSE	16	0.0163934	5.93074	4.80112	0.00144204
1348	107	148	A	40	3	121	112	4.63	5.02	1	lalt	TRUE	0.186738	3	0.146571	FALSE	-1.66844	-2.24076	-2.59246	FALSE	FALSE	3	0.076087	3.71621	4.79501	0.00136262
1349	107	149	I	20	0	168	107	5.16	4.27	0	lalt	FALSE	0.664688	3	0	FALSE	1.44595	-1.12385	-8.4141	FALSE	FALSE	14	0.0162162	5.94642	4.80005	0.00135575
1350	107	150	T	40	157	193	131	3.91	3.52	1	lalt	TRUE	0.431852	3	0.482857	TRUE	-3.93482	-4.6164	-2.18798	FALSE	FALSE	31	0.0860215	3.53916	4.79309	0.00131598
1351	107	151	R	80	138	154	91	4.71	4.03	0	ralt	TRUE	0.332097	3	0.119714	FALSE	13.1866	12.213	0.556361	FALSE	FALSE	28	0.0106952	6.54689	4.80078	0.00181334
1352	107	152	A	40	157	193	131	5.19	4.6	0	ralt	TRUE	0.280226	3	0.223714	FALSE	-3.15387	-3.00647	15.0591	FALSE	FALSE	1	0.0106383	6.55459	4.80843	0.00322227
1353	107	153	T	40	138	154	91	5.06	4.25	0	ralt	TRUE	0.380217	3	0.224571	FALSE	-20.8194	-30.3344	24.745	FALSE	FALSE	34	0.010582	6.56224	4.81603	0.00320574
1354	107	154	I	20	76	154	68	5.41	4.46	1	lalt	TRUE	1.01134	3	0.124	FALSE	-1.15268	-17.5183	12.5708	FALSE	FALSE	12	0.0736842	3.7625	4.81027	0.00181843
1355	107	155	A	40	0	168	107	5.23	4.09	0	ralt	TRUE	0.382357	3	0.782	TRUE	3.47479	6.50376	-15.2563	FALSE	FALSE	2	0.0209424	5.57743	4.81342	0.00105288
1356	107	156	D	80	0	168	107	4.08	4.62	0	ralt	TRUE	0.284464	3	0.233714	FALSE	0.196873	10.1533	-8.27966	FALSE	FALSE	8	0.0104167	6.58496	4.821	0.00240458
1357	107	157	A	40	3	121	112	5.39	5.1	1	lalt	TRUE	0.272648	3	0.262	FALSE	5.25266	8.76185	-5.12796	FALSE	FALSE	3	0.0777202	3.68557	4.81492	0.0017746
1358	107	158	A	40	157	193	131	5.45	3.68	0	ralt	TRUE	0.272587	3	0.724571	TRUE	-14.3563	-15.0295	7.00551	FALSE	FALSE	1	0.0154639	6.01495	4.81998	0.00128006
1359	107	159	O	20	75	124	89	5.05	4.5	1	lalt	TRUE	0.726733	3	0.229714	FALSE	-4.72515	-3.35874	2.24555	FALSE	FALSE	23	0.0769231	3.70044	4.81405	0.00127392
1360	107	160	I	20	157	193	131	5.46	4.39	0	ralt	TRUE	0.486772	3	0.103143	FALSE	-12.4629	-20.8175	21.8945	FALSE	FALSE	13	0.0204082	5.61471	4.81728	0.00101144
1361	107	161	I	20	76	154	68	5.04	4.37	1	lalt	TRUE	0.426844	3	0.122571	FALSE	5.78501	2.59627	-2.76718	FALSE	FALSE	12	0.0761421	3.71516	4.8115	0.00100671
1362	107	162	D	80	138	154	91	3.54	4.96	1	lalt	TRUE	0.411927	3	0.228	FALSE	-10.7564	-2.49572	-8.80422	FALSE	FALSE	10	0.0707071	3.822	4.80629	0.000416071
1363	107	163	T	40	76	154	68	4.8	5.15	0	ralt	TRUE	0.750055	3	0.615143	TRUE	12.533	7.52869	-13.3494	FALSE	FALSE	30	0.0150754	6.05166	4.81145	0.00126636
1364	107	164	A	40	76	154	68	4.87	4.3	0	ralt	TRUE	0.2921	3	0.224857	FALSE	2.53838	1.95602	-3.05654	FALSE	FALSE	0	0.01	6.64386	4.81903	0.00256317
1365	107	165	I	20	3	121	112	5.2	4.37	0	ralt	TRUE	0.548176	3	0.234857	FALSE	3.85009	-2.3269	-1.04496	FALSE	FALSE	15	0.0149254	6.06609	4.82415	0.00255083
1366	107	166	O	20	3	121	112	4.16	5.26	0	ralt	TRUE	0.402183	3	0.118857	FALSE	-2.42539	-5.07637	8.04892	FALSE	FALSE	21	0.0148515	6.07325	4.82925	0.00207193
1367	107	167	O	20	75	124	89	5.33	3.59	1	lalt	TRUE	0.396348	3	0.114	FALSE	-4.32449	-6.96914	-0.322165	FALSE	FALSE	23	0.0788177	3.66534	4.82334	0.0012127
1368	107	168	A	40	75	124	89	4.36	3.79	0	ralt	TRUE	0.314468	3	0.234857	FALSE	2.29603	1.31101	-2.53188	FALSE	FALSE	5	0.0147059	6.08746	4.82846	0.00120713
1369	107	169	A	40	157	193	131	4.97	4.36	0	ralt	TRUE	0.311662	3	0.118	FALSE	4.79147	4.59895	-12.6261	FALSE	FALSE	1	0.0195122	5.67948	4.8318	0.00179758
1370	107	170	O	20	75	124	89	5.06	3.98	1	lalt	TRUE	0.592739	3	0.58	TRUE	7.76492	14.4961	0.708647	FALSE	FALSE	23	0.0825243	3.59904	4.82566	0.000939806
1371	107	171	T	40	76	154	68	4.87	3.96	0	ralt	TRUE	0.421796	3	0.237429	FALSE	1.97019	5.79942	1.77643	FALSE	FALSE	30	0.0193237	5.69349	4.82905	0.000935614
1372	107	172	T	40	157	193	131	3.82	4.56	1	lalt	TRUE	0.42697	3	0.210571	FALSE	-2.65385	-6.84066	0.65892	FALSE	FALSE	31	0.0817308	3.61298	4.82305	0.000931459
1373	107	173	A	40	3	121	112	3.52	5.43	1	lalt	TRUE	0.229124	3	0.117429	FALSE	-7.32576	-3.54402	0.657667	FALSE	FALSE	3	0.076555	3.70736	4.81754	0.000342711
1374	107	174	R	80	138	154	91	4.19	5.13	0	ralt	TRUE	0.352236	3	0.646	TRUE	0.530401	10.8731	-22.1001	FALSE	FALSE	28	0.0142857	6.12928	4.82274	0.00117472
1375	107	175	T	40	138	154	91	4.83	3.96	0	ralt	TRUE	0.364366	3	0.171429	FALSE	-0.618993	-11.4144	11.2316	FALSE	FALSE	34	0.014218	6.13614	4.82793	0.00198686
1376	107	176	D	80	75	124	89	5.3	4.38	0	ralt	TRUE	0.34448	3	0.129429	FALSE	10.7455	0.807597	24.9201	FALSE	FALSE	11	0.0188679	5.72792	4.83139	0.0017407
1377	107	177	R	80	0	168	107	4.65	4.58	1	lalt	TRUE	0.929502	3	0.36	FALSE	3.58782	27.8181	-10.3013	FALSE	FALSE	26	0.056338	4.14975	4.82794	0.000990124
1378	107	178	I	20	76	154	68	5.03	3.74	1	lalt	TRUE	0.742571	3	0.217429	FALSE	15.8476	8.61385	-17.4459	FALSE	FALSE	12	0.0747664	3.74147	4.8227	0.000414781
1379	107	179	I	20	0	168	107	3.64	4.28	0	lalt	FALSE	0.863808	3	0.578857	TRUE	7.1507	13.28	-7.36438	FALSE	FALSE	14	0.0186047	5.74819	4.82623	0.000915173
1380	107	180	D	80	138	154	91	3.5	5.41	1	lalt	TRUE	0.435988	4	0.195714	FALSE	5.15672	-8.45891	-3.15985	FALSE	FALSE	10	0.0694444	3.848	4.82152	0.000924525
1381	107	181	O	20	138	154	91	4.01	4.49	0	ralt	TRUE	0.501118	4	0.596286	TRUE	20.1693	-25.2582	13.0228	FALSE	FALSE	22	0.0138249	6.17659	4.82675	0.00115226
1382	107	182	O	20	75	124	89	5.27	3.82	1	lalt	TRUE	0.483261	4	0.315429	FALSE	4.62353	16.9635	-2.29202	FALSE	FALSE	23	0.0825688	3.59826	4.82098	0.00111211
1383	107	183	R	80	0	168	107	3.52	4.52	1	lalt	TRUE	0.307373	4	0.321429	FALSE	5.95967	19.1277	38.0963	FALSE	FALSE	26	0.0593607	4.07435	4.81735	0.000364887
1384	107	184	O	20	157	193	131	4.1	4.2	0	ralt	TRUE	0.51753	4	0.247714	FALSE	1.76369	-9.87583	-5.35758	FALSE	FALSE	19	0.0181818	5.78136	4.82097	0.00094085
1385	107	185	O	20	76	154	68	4.86	4.91	0	ralt	TRUE	0.314725	4	0.234571	FALSE	6.60237	-2.28251	-4.73026	FALSE	FALSE	18	0.0135747	6.20294	4.82623	0.00167263
1386	107	186	I	20	76	154	68	5.21	4.13	1	lalt	TRUE	0.290784	4	0.115429	FALSE	4.93529	-42.124	22.1174	FALSE	FALSE	12	0.0765766	3.70695	4.82104	0.00110342
1387	107	187	D	80	138	154	91	4.32	3.59	1	lalt	TRUE	0.439886	4	0.13	FALSE	-4.47439	-4.43387	17.5415	FALSE	FALSE	10	0.0717489	3.8009	4.81631	0.000325173
1388	107	188	D	80	0	168	107	4.72	4.57	0	ralt	TRUE	0.269071	4	0.229714	FALSE	2.58353	5.90835	-2.19051	FALSE	FALSE	8	0.0133929	6.22239	4.8216	0.00110546
1389	107	189	R	80	76	154	68	3.8	4.36	0	ralt	TRUE	0.294184	4	0	FALSE	-0.0596562	3.55952	-0.662209	FALSE	FALSE	24	0.0133333	6.22882	4.82688	0.00186755
1390	107	190	T	40	157	193	131	4.38	3.67	1	lalt	TRUE	1.17931	4	0.477143	TRUE	-4.00497	-1.73166	10.2502	FALSE	FALSE	31	0.079646	3.65025	4.82154	0.00107498
1391	107	191	A	40	3	121	112	3.63	3.51	1	lalt	TRUE	0.200422	4	0.0788571	FALSE	6.28838	1.83265	-2.57974	FALSE	FALSE	3	0.0748899	3.73909	4.81662	0.000299328
1392	107	192	A	40	3	121	112	4.68	4.5	1	lalt	TRUE	0.242823	4	0.116857	FALSE	-1.49932	-12.3122	-0.872126	FALSE	FALSE	3	0.0789474	3.66297	4.81143	0.000658362
1393	107	193	R	80	76	154	68	5.21	5.44	0	ralt	TRUE	0.419881	4	0.810857	TRUE	7.14586	10.8446	-6.03727	FALSE	FALSE	24	0.0174672	5.8392	4.81518	0.000842086
1394	107	194	O	20	75	124	89	4.3	5.2	1	lalt	TRUE	0.305855	4	0.246	FALSE	-24.467	-14.4569	18.4143	FALSE	FALSE	23	0.0826087	3.59756	4.80976	0.000829864
1395	107	195	T	40	75	124	89	4.21	5.42	0	ralt	TRUE	0.288969	4	0.0908571	FALSE	1.83938	5.78761	-4.44185	FALSE	FALSE	35	0.012987	6.26679	4.81512	0.00104424
1396	107	196	R	80	0	168	107	5.07	5.26	1	lalt	TRUE	0.301998	4	0.0602857	FALSE	0.29913	11.8857	-6.28466	FALSE	FALSE	26	0.0603448	4.05063	4.81164	0.00109588
1397	107	197	O	20	138	154	91	4.06	4.17	0	ralt	TRUE	0.919004	4	0.119429	FALSE	6.48361	14.5122	-17.6752	FALSE	FALSE	22	0.0171674	5.86419	4.81543	0.000875573
1398	107	198	A	40	75	124	89	5.25	3.92	0	ralt	TRUE	0.317185	4	0.108286	FALSE	0.230737	-3.32576	0.522184	FALSE	FALSE	5	0.017094	5.87036	4.81923	0.00136827
1399	107	199	I	20	76	154	68	4.38	5.29	1	lalt	TRUE	0.792264	4	0.494286	TRUE	14.1049	13.6234	1.40437	FALSE	FALSE	12	0.0765957	3.70659	4.81436	0.000822044
1400	107	200	I	20	75	124	89	3.85	5.06	0	ralt	TRUE	0.375324	4	0.122571	FALSE	1.57999	0.616398	-4.18553	FALSE	FALSE	17	0.0127119	6.29768	4.81971	0.00103192
1401	107	201	O	20	76	154	68	4.25	4.03	0	ralt	TRUE	0.795397	4	0.198571	FALSE	-5.06943	-11.6029	0.352728	FALSE	FALSE	18	0.0168776	5.88874	4.82351	0.0015639
1402	107	202	D	80	76	154	68	5.4	4.38	0	ralt	TRUE	0.386572	4	0.228857	FALSE	3.14577	2.1421	2.79647	FALSE	FALSE	6	0.0168067	5.89482	4.82731	0.00134624
1403	107	203	T	40	0	168	107	4.68	3.85	0	ralt	TRUE	0.354641	4	0.364286	FALSE	5.38764	5.44436	-5.80176	FALSE	FALSE	32	0.0167364	5.90087	4.8311	0.00134084
1404	107	204	T	40	138	154	91	5.38	4.1	0	ralt	TRUE	0.89075	4	0.282857	FALSE	4.96457	-13.5819	0.648235	FALSE	FALSE	34	0.0166667	5.90689	4.83489	0.00133548
1405	107	205	D	80	0	168	107	4.86	4.57	0	ralt	TRUE	0.346755	4	0.273714	FALSE	8.12069	0.392702	-3.90395	FALSE	FALSE	8	0.0165975	5.91289	4.83866	0.00133017
1406	107	206	R	80	138	154	91	4.57	3.71	0	ralt	TRUE	0.301922	4	0.136857	FALSE	-0.414749	0.187439	-4.48817	FALSE	FALSE	28	0.0165289	5.91886	4.84243	0.0013249
1407	107	207	R	80	0	168	107	3.86	5.31	1	lalt	TRUE	0.442087	4	0.234857	FALSE	6.14155	14.3715	-3.7576	FALSE	FALSE	26	0.0617284	4.01792	4.83887	0.000828322
1408	107	208	A	40	76	154	68	3.9	5.29	0	ralt	TRUE	0.308194	4	0.228286	FALSE	-2.814	-5.72362	0.244491	FALSE	FALSE	0	0.0122951	6.34577	4.84415	0.0010313
1409	107	209	D	80	138	154	91	5.01	4.96	1	lalt	TRUE	0.426215	4	0.336286	FALSE	6.90486	5.64162	-6.94231	FALSE	FALSE	10	0.0693878	3.84918	4.83995	0.00100523
1410	107	210	I	20	138	154	91	4.19	4.15	0	ralt	TRUE	0.429322	4	0.110857	FALSE	0.170665	-6.92494	6.18477	FALSE	FALSE	16	0.0162602	5.94251	4.84375	0.000796859
1411	107	211	I	20	76	154	68	4.07	4.47	1	lalt	TRUE	0.452496	4	0.249714	FALSE	8.80948	-3.70666	-0.36999	FALSE	FALSE	12	0.0769231	3.70044	4.839	0.00077647
1412	107	212	R	80	0	168	107	5.18	4.49	1	lalt	TRUE	0.298637	4	0.361429	FALSE	2.72284	6.91927	-3.51073	FALSE	FALSE	26	0.0645161	3.9542	4.83528	0.00028048
1413	107	213	T	40	3	121	112	5.21	4.77	0	ralt	TRUE	0.290711	4	0.220857	FALSE	0.706107	-5.36733	0.608879	FALSE	FALSE	33	0.0160643	5.96	4.83912	0.000798061
1414	107	214	T	40	157	193	131	3.72	4.33	1	lalt	TRUE	0.550733	4	0.279714	FALSE	-2.50203	5.83726	-4.11191	FALSE	FALSE	31	0.076	3.71786	4.83452	0.000767749
1415	107	215	R	80	0	168	107	3.52	4.94	1	lalt	TRUE	0.305916	4	0.233429	FALSE	-5.55263	-20.3885	20.923	FALSE	FALSE	26	0.0677291	3.88408	4.83059	0.000267577
1416	107	216	R	80	157	193	131	3.91	5.41	0	ralt	TRUE	0.371077	4	0.236286	FALSE	2.20458	-15.8043	18.1268	FALSE	FALSE	25	0.0119048	6.39232	4.83592	0.00097871
1417	107	217	T	40	157	193	131	4.95	4.47	1	lalt	TRUE	0.254204	4	0.18	FALSE	-1.23185	-0.259069	-2.18857	FALSE	FALSE	31	0.0790514	3.66107	4.83116	0.00095085
1418	107	218	I	20	3	121	112	4.18	4.5	0	ralt	TRUE	0.941194	4	0.275714	FALSE	-0.163121	-7.41339	3.35964	FALSE	FALSE	15	0.015748	5.98868	4.83506	0.000749222
1419	107	219	A	40	76	154	68	4.99	4.5	0	ralt	TRUE	0.284305	4	0.226571	FALSE	2.37757	-6.54388	7.38022	FALSE	FALSE	0	0.0156863	5.99435	4.83894	0.00126
1420	107	220	R	80	75	124	89	5.24	4.58	0	ralt	TRUE	0.279524	4	0.244571	FALSE	-2.67558	-1.83308	-6.39501	FALSE	FALSE	29	0.0117188	6.41504	4.84424	0.00145181
1421	107	221	A	40	3	121	112	3.72	4.06	1	lalt	TRUE	0.266515	4	0.244	FALSE	6.88361	-2.79401	-2.13193	FALSE	FALSE	3	0.07393	3.7577	4.8399	0.000943914
1422	107	222	I	20	75	124	89	3.91	3.79	0	ralt	TRUE	1.0627	4	0.296857	FALSE	-1.60027	-6.53683	5.74908	FALSE	FALSE	17	0.0155039	6.01123	4.84379	0.00074542
1423	107	223	A	40	3	121	112	4.96	4.91	1	lalt	TRUE	0.299895	4	0.187143	FALSE	13.9757	14.1428	-13.0555	FALSE	FALSE	3	0.0772201	3.69488	4.83924	0.000735659
1424	107	224	D	80	3	121	112	3.88	4.08	0	ralt	TRUE	0.350951	4	0.250571	FALSE	-2.78515	-6.2189	0.629606	FALSE	FALSE	9	0.0115385	6.43741	4.84454	0.000926528
1425	107	225	R	80	0	168	107	4.72	5.05	1	lalt	TRUE	2.20602	4	0.245429	FALSE	-7.57692	-10.0063	11.8552	FALSE	FALSE	26	0.0689655	3.85798	4.84064	0.000937933
1426	107	226	T	40	75	124	89	4.04	4.94	0	ralt	TRUE	0.385082	4	0.121429	FALSE	3.2624	1.42551	-1.7342	FALSE	FALSE	35	0.0152672	6.03342	4.84455	0.000742476
1427	107	227	R	80	75	124	89	5.35	4.89	0	ralt	TRUE	0.260211	4	0.221143	FALSE	4.45884	6.43621	-4.98847	FALSE	FALSE	29	0.0152091	6.03892	4.84845	0.00122313
1428	107	228	R	80	0	168	107	4.03	3.75	1	lalt	TRUE	0.306227	4	0.148571	FALSE	3.84917	6.95475	-6.87129	FALSE	FALSE	26	0.0719697	3.79647	4.84435	0.000729504
1429	107	229	R	80	3	121	112	4.63	3.66	0	ralt	TRUE	0.28944	4	0.112286	FALSE	-1.8556	22.4635	-15.5125	FALSE	FALSE	27	0.0113208	6.46489	4.84963	0.000916803
1430	107	230	D	80	138	154	91	4.32	4.6	1	lalt	TRUE	0.589605	4	0.236571	FALSE	5.24893	34.2842	-5.61287	FALSE	FALSE	10	0.0676692	3.88536	4.84589	0.000921149
1431	107	231	R	80	0	168	107	5.46	3.94	1	lalt	TRUE	0.247739	4	0.296	FALSE	-4.92319	-16.3804	20.3105	FALSE	FALSE	26	0.0749064	3.73877	4.84163	0.000238856
1432	107	232	O	20	75	124	89	5.07	4.97	1	lalt	TRUE	0.275797	4	0.129143	FALSE	3.78095	-2.66086	-12.1757	FALSE	FALSE	23	0.0746269	3.74416	4.83743	0.000223724
1433	107	233	D	80	138	154	91	4.34	3.9	1	lalt	TRUE	0.693773	4	0.239429	FALSE	-4.13816	-9.76432	11.1148	FALSE	FALSE	10	0.070632	3.82353	4.83355	0.000229843
1434	107	234	R	80	157	193	131	4.98	3.62	0	ralt	TRUE	0.44301	4	0.239714	FALSE	4.71487	0.0260361	1.08047	FALSE	FALSE	25	0.0148148	6.07682	4.83753	0.000714251
1435	107	235	D	80	3	121	112	3.73	3.56	0	ralt	TRUE	0.427154	4	0.238	FALSE	0.924578	4.09332	-4.09922	FALSE	FALSE	9	0.0147601	6.08215	4.8415	0.00118835
1436	107	236	O	20	3	121	112	4.95	5.36	0	ralt	TRUE	0.317323	4	0.236	FALSE	-3.37596	-3.67658	-0.167721	FALSE	FALSE	21	0.0147059	6.08746	4.84546	0.00118414
1437	107	237	D	80	138	154	91	4.49	5.04	1	lalt	TRUE	0.427388	4	0.123143	FALSE	-5.20794	-4.9311	-7.38975	FALSE	FALSE	10	0.0732601	3.77083	4.84142	0.000700161
1438	107	238	R	80	3	121	112	5.42	5.15	0	ralt	TRUE	0.339477	4	0.239143	FALSE	0.755431	1.24359	4.15471	FALSE	FALSE	27	0.0145985	6.09803	4.84539	0.000697756
1439	107	239	I	20	76	154	68	3.6	4.12	1	lalt	TRUE	0.390488	4	0.230286	FALSE	5.6408	4.63462	0.678744	FALSE	FALSE	12	0.0727273	3.78136	4.84142	0.000695367
1440	108	0	O	40	138	154	91	5.25	5.36	0	ralt	FALSE	0.584968	1	0.109429	FALSE	-4.4329	-8.29077	3.10858	FALSE	FALSE	22	0.0277778	5.16993	5.1554	0.0145257
1441	108	1	R	80	138	154	91	5	4.37	1	lalt	FALSE	1.58286	1	0.104286	FALSE	4.80609	-6.67648	1.34956	FALSE	FALSE	28	0.027027	5.20945	5.14266	0.0272606
1442	108	2	D	40	3	121	112	4.69	4.38	1	ralt	TRUE	1.48288	1	0	FALSE	20.2033	4.82585	-16.0463	FALSE	FALSE	9	0.0263158	5.24793	5.13156	0.0266152
1443	108	3	R	80	138	154	91	3.72	3.77	1	ralt	TRUE	1.27493	1	0	FALSE	13.5496	4.92349	-5.79199	FALSE	FALSE	28	0.0512821	4.2854	5.10306	0.0198716
1444	108	4	A	20	76	154	68	5.22	4.98	1	lalt	FALSE	0.963031	1	0.0962857	FALSE	3.28813	-9.48697	-8.76915	FALSE	FALSE	0	0.025	5.32193	5.09524	0.0194328
1445	108	5	R	80	75	124	89	5.15	3.76	0	ralt	FALSE	1.598	1	0.0908571	FALSE	1.3711	-6.40993	3.68503	FALSE	FALSE	29	0.0243902	5.35755	5.08863	0.0248488
1446	108	6	D	40	3	121	112	3.51	4.65	1	ralt	TRUE	1.39705	1	0.197714	FALSE	1.71107	-2.12487	-3.88854	FALSE	FALSE	9	0.047619	4.39232	5.06557	0.0186102
1447	108	7	D	40	3	121	112	4.67	5.16	1	ralt	TRUE	0.920185	1	0	FALSE	-2.11884	-7.0042	-4.01905	FALSE	FALSE	9	0.0697674	3.8413	5.03318	0.0237949
1448	108	8	R	80	138	154	91	3.92	5.12	1	ralt	TRUE	0.868204	1	0.615714	TRUE	5.23645	23.8841	-13.1815	FALSE	FALSE	28	0.0681818	3.87447	5.00296	0.0081961
1449	108	9	A	20	76	154	68	5.16	3.88	1	lalt	FALSE	1.02719	1	0.109429	FALSE	-1.08664	-5.23074	11.0426	FALSE	FALSE	0	0.0444444	4.49185	4.98541	0.0101096
1450	108	10	R	80	76	154	68	4.15	5.16	0	lalt	TRUE	1.19031	1	0.102	FALSE	7.28154	-15.3367	0.172507	FALSE	FALSE	24	0.0217391	5.52356	4.98534	0.0171555
1451	108	11	A	20	138	154	91	3.62	4.25	0	ralt	FALSE	0.761376	1	0.115714	FALSE	-0.920655	-13.3186	5.04594	FALSE	FALSE	4	0.0212766	5.55459	4.9859	0.0219328
1452	108	12	I	20	157	193	131	4.31	3.76	0	ralt	FALSE	1.3715	1	0.100857	FALSE	18.1861	7.48512	-15.6023	FALSE	FALSE	13	0.0208333	5.58496	4.98706	0.0215117
1453	108	13	I	20	75	124	89	5.35	4.23	1	lalt	FALSE	1.27659	1	0.112286	FALSE	0.304321	-4.17199	-1.50952	FALSE	FALSE	17	0.0204082	5.61471	4.98876	0.0211063
1454	108	14	A	20	76	154	68	3.53	4.05	1	ralt	TRUE	1.07262	1	0.118286	FALSE	26.9487	16.5423	-13.3692	FALSE	FALSE	0	0.06	4.05889	4.96654	0.0140521
1455	108	15	A	20	3	121	112	4.85	5.26	0	ralt	FALSE	1.14578	1	0.149143	FALSE	-10.8765	-21.2571	11.6677	FALSE	FALSE	3	0.0196078	5.67243	4.96967	0.013804
1456	108	16	O	40	0	168	107	4.15	4.32	1	lalt	FALSE	0.861773	1	0	FALSE	5.72114	-19.0231	3.7277	FALSE	FALSE	20	0.0192308	5.70044	4.9732	0.0199766
1457	108	17	I	20	3	121	112	5.19	5.29	0	ralt	FALSE	0.977869	1	0.115714	FALSE	21.1717	12.483	-15.8399	FALSE	FALSE	15	0.0188679	5.72792	4.97711	0.0196263
1458	108	18	R	80	138	154	91	4.09	4.66	1	ralt	TRUE	0.870831	1	0.109429	FALSE	2.72041	-14.3539	12.0641	FALSE	FALSE	28	0.0740741	3.75489	4.95209	0.0121906
1459	108	19	T	80	157	193	131	4.45	5.06	1	lalt	FALSE	1.00792	1	0.224286	FALSE	14.3644	10.2576	-13.524	FALSE	FALSE	31	0.0181818	5.78136	4.95718	0.0119904
1460	108	20	T	80	157	193	131	5.01	4.77	1	ralt	TRUE	1.20598	1	0.110857	FALSE	-6.39571	-3.73569	4.41618	FALSE	FALSE	31	0.0357143	4.80735	4.9493	0.0318888
1461	108	21	R	80	3	121	112	3.53	4.41	0	lalt	TRUE	1.02387	1	0	FALSE	20.3149	6.64641	-6.89561	FALSE	FALSE	27	0.0175439	5.83289	4.95514	0.0141134
1462	108	22	O	40	138	154	91	4.82	4.54	0	ralt	FALSE	1.52804	1	0.116	FALSE	-13.5709	-1.32541	1.52316	FALSE	FALSE	22	0.0344828	4.85798	4.94842	0.0138891
1463	108	23	I	20	75	124	89	4.59	4.64	1	ralt	TRUE	1.10406	1	0.123714	FALSE	9.44284	15.0113	-13.598	FALSE	FALSE	17	0.0338983	4.88264	4.94232	0.00958665
1464	108	24	D	40	3	121	112	3.57	4.63	1	ralt	TRUE	0.384191	1	0.108571	FALSE	16.3128	10.4546	-7.69505	FALSE	FALSE	9	0.0666667	3.90689	4.9228	0.00706191
1465	108	25	R	80	138	154	91	5.27	3.93	1	lalt	FALSE	1.11127	1	0.214857	FALSE	-2.79063	-3.74084	5.97165	FALSE	FALSE	28	0.0819672	3.60881	4.89961	0.00411117
1466	108	26	A	20	3	121	112	5.41	4	0	lalt	TRUE	0.702345	1	0	FALSE	15.3238	4.70708	-11.2995	FALSE	FALSE	3	0.0322581	4.9542	4.89571	0.00636367
1467	108	27	R	80	157	193	131	4.17	5.43	0	ralt	FALSE	0.887388	1	0.178	FALSE	13.9584	3.5422	-15.3562	FALSE	FALSE	25	0.015873	5.97728	4.90408	0.0128664
1468	108	28	D	40	0	168	107	4.71	4.36	0	lalt	TRUE	0.762415	1	0.121429	FALSE	2.59567	1.89372	1.19848	FALSE	FALSE	8	0.015625	6	4.91254	0.0164506
1469	108	29	R	80	138	154	91	4.67	3.56	1	ralt	TRUE	0.757496	1	0.116857	FALSE	4.913	4.99123	-4.91833	FALSE	FALSE	28	0.0923077	3.43741	4.88863	0.00949599
1470	108	30	A	20	0	168	107	4.32	3.8	0	lalt	TRUE	0.912624	1	0.109429	FALSE	1.97927	6.54893	-2.34207	FALSE	FALSE	2	0.0151515	6.04439	4.89772	0.0093644
1471	108	31	O	40	138	154	91	4.23	5	0	ralt	FALSE	0.921771	1	0.113714	FALSE	4.66427	-5.30529	-3.81018	FALSE	FALSE	22	0.0447761	4.48113	4.88855	0.010757
1472	108	32	R	80	157	193	131	4.17	5.46	0	lalt	TRUE	0.874808	1	0.0851429	FALSE	10.8142	4.57395	-9.12861	FALSE	FALSE	25	0.0294118	5.08746	4.88707	0.00705803
1473	108	33	I	20	75	124	89	4.6	3.95	1	ralt	TRUE	0.768847	1	0.115143	FALSE	-2.36916	-0.234041	3.60149	FALSE	FALSE	17	0.0434783	4.52356	4.87891	0.00696607
1474	108	34	O	40	75	124	89	4.27	4.65	0	lalt	TRUE	0.713948	1	0.107429	FALSE	-3.32987	-16.7039	12.5438	FALSE	FALSE	23	0.0142857	6.12928	4.88882	0.0103287
1475	108	35	A	20	3	121	112	5.25	3.73	0	lalt	TRUE	0.532084	1	0	FALSE	-7.14047	3.87175	4.74068	FALSE	FALSE	3	0.0422535	4.56478	4.88144	0.0101934
1476	108	36	O	40	0	168	107	4.55	3.58	1	lalt	FALSE	0.586107	1	0.111143	FALSE	-1.15767	-8.32355	0.849263	FALSE	FALSE	20	0.0277778	5.16993	4.88125	0.0067039
1477	108	37	R	80	3	121	112	3.59	5.16	0	lalt	TRUE	0.643327	1	0.0357143	FALSE	5.25816	-14.0093	0.319936	FALSE	FALSE	27	0.0273973	5.18982	4.88134	0.00790103
1478	108	38	R	80	138	154	91	4.35	4.86	1	ralt	TRUE	0.614448	1	0	FALSE	9.75492	-8.37806	-8.03079	FALSE	FALSE	28	0.0945946	3.4021	4.86043	0.00495318
1479	108	39	I	20	157	193	131	5.02	3.75	0	ralt	FALSE	0.939483	1	0.141429	FALSE	10.8798	4.15282	-8.05139	FALSE	FALSE	13	0.0266667	5.22882	4.86129	0.00489491
1480	108	40	D	40	3	121	112	5.14	3.77	1	ralt	TRUE	0.309634	1	0.127143	FALSE	-5.19178	-5.00733	5.19403	FALSE	FALSE	9	0.0657895	3.926	4.84751	0.00531908
1481	108	41	A	20	138	154	91	4.89	3.76	0	lalt	TRUE	0.720643	1	0.117714	FALSE	22.9459	8.87111	-6.85252	FALSE	FALSE	4	0.025974	5.26679	4.849	0.00525727
1482	108	42	O	40	0	168	107	3.77	4.09	1	lalt	FALSE	1.03581	1	0.106286	FALSE	-0.454392	5.62927	-8.51828	FALSE	FALSE	20	0.0384615	4.70044	4.84449	0.00623412
1483	108	43	R	80	138	154	91	3.53	4.85	1	ralt	TRUE	0.374993	1	0.118	FALSE	-3.57252	-0.667481	0.864603	FALSE	FALSE	28	0.101266	3.30378	4.82426	0.00334256
1484	108	44	O	40	0	168	107	3.76	4.98	1	lalt	FALSE	0.356159	1	0.119143	FALSE	20.2189	14.2017	-13.4823	FALSE	FALSE	20	0.05	4.32193	4.81611	0.00268341
1485	108	45	I	20	76	154	68	3.58	4.76	0	lalt	TRUE	0.695269	1	0	FALSE	4.97595	-5.71987	-7.214	FALSE	FALSE	12	0.0123457	6.33985	4.828	0.0083961
1486	108	46	R	80	138	154	91	5.21	5.09	1	ralt	TRUE	1.20431	1	0.106	FALSE	3.40219	-6.23598	20.5119	FALSE	FALSE	28	0.109756	3.18763	4.80741	0.00722058
1487	108	47	A	20	76	154	68	5.46	4.63	1	lalt	FALSE	0.542396	1	0.114286	FALSE	-0.834465	-5.30974	0.142019	FALSE	FALSE	0	0.0481928	4.37504	4.80038	0.00249257
1488	108	48	D	40	76	154	68	4.3	4.14	0	lalt	TRUE	0.38337	1	0	FALSE	9.33833	-16.1014	2.83384	FALSE	FALSE	6	0.0119048	6.39232	4.81265	0.00811485
1489	108	49	T	80	157	193	131	4	4.47	1	ralt	TRUE	0.733548	1	0.115143	FALSE	11.8032	-0.601906	2.4429	FALSE	FALSE	31	0.0352941	4.82443	4.81036	0.00861255
1490	108	50	D	40	76	154	68	4.32	4.47	0	lalt	TRUE	0.484685	1	0.0582857	FALSE	10.9643	16.3036	-22.5646	FALSE	FALSE	6	0.0232558	5.42626	4.81395	0.00570074
1491	108	51	R	80	138	154	91	5.13	4.49	1	ralt	TRUE	0.675799	1	0.104571	FALSE	6.7595	10.8229	0.416917	FALSE	FALSE	28	0.114943	3.12102	4.79401	0.00396298
1492	108	52	A	20	76	154	68	4.26	3.64	1	ralt	TRUE	0.882835	1	0.111429	FALSE	5.15499	4.40054	-2.13149	FALSE	FALSE	0	0.0568182	4.1375	4.7852	0.00193754
1493	108	53	I	20	157	193	131	4.67	4.3	0	ralt	FALSE	0.670001	1	0.235714	FALSE	6.11891	-4.22237	-3.32497	FALSE	FALSE	13	0.0337079	4.89077	4.78405	0.00356026
1494	108	54	T	80	138	154	91	4.79	3.81	0	lalt	TRUE	0.846067	1	0.119429	FALSE	6.01337	6.29288	8.06884	FALSE	FALSE	34	0.0111111	6.49185	4.79678	0.00816022
1495	108	55	A	20	76	154	68	4.95	3.51	1	lalt	FALSE	0.590197	1	0.498571	TRUE	-9.04996	-3.1631	-7.57059	FALSE	FALSE	0	0.0659341	3.92283	4.78613	0.00695143
1496	108	56	A	20	0	168	107	4.09	3.71	0	lalt	TRUE	0.731333	1	0.116857	FALSE	-7.88558	-10.0365	14.3988	FALSE	FALSE	2	0.0217391	5.52356	4.79078	0.0042448
1497	108	57	I	20	75	124	89	4.21	4.34	1	lalt	FALSE	0.637516	1	0.243714	FALSE	7.97348	-2.83023	-11.4978	FALSE	FALSE	17	0.0430108	4.53916	4.78641	0.00476596
1498	108	58	D	40	3	121	112	3.93	4.48	1	ralt	TRUE	0.280664	1	0.114	FALSE	-8.9288	1.04153	-5.79145	FALSE	FALSE	9	0.0638298	3.96963	4.77669	0.0026336
1499	108	59	O	40	0	168	107	5.26	4.37	1	lalt	FALSE	0.592796	1	0.130286	FALSE	3.48473	0.824262	-18.5882	FALSE	FALSE	20	0.0526316	4.24793	4.76985	0.00228212
1500	108	60	D	40	3	121	112	4.55	4.15	1	ralt	TRUE	1.13711	2	0	FALSE	-10.1326	-0.540534	20.3655	FALSE	FALSE	9	0.0729167	3.77761	4.75869	0.00210119
1501	108	61	I	20	75	124	89	3.69	5.02	1	ralt	TRUE	0.699199	2	0.110571	FALSE	7.9504	18.5063	-5.03903	FALSE	FALSE	17	0.0515464	4.27798	4.75247	0.00208293
1502	108	62	R	80	0	168	107	3.8	4.17	0	lalt	TRUE	0.44136	2	0.101714	FALSE	6.78293	8.29804	-11.7584	FALSE	FALSE	26	0.0102041	6.61471	4.76573	0.00669972
1503	108	63	I	20	0	168	107	5.45	4.69	0	ralt	FALSE	0.695531	2	0.212857	FALSE	-1.74765	-1.08253	-4.18539	FALSE	FALSE	14	0.010101	6.62936	4.77886	0.0108537
1504	108	64	O	40	76	154	68	5	5.08	0	lalt	TRUE	0.881509	2	0	FALSE	-4.03059	-2.1534	4.49916	FALSE	FALSE	18	0.01	6.64386	4.79188	0.0107491
1505	108	65	D	40	138	154	91	3.97	4.23	0	lalt	TRUE	0.34956	2	0.107143	FALSE	-1.8732	-9.06359	-0.0642054	FALSE	FALSE	10	0.00990099	6.65821	4.80479	0.0106465
1506	108	66	I	20	76	154	68	4.07	5.05	0	ralt	FALSE	0.922662	2	0.198571	FALSE	6.76435	2.78514	-9.34097	FALSE	FALSE	12	0.0196078	5.67243	4.81025	0.00816617
1507	108	67	O	40	3	121	112	3.91	5.03	0	lalt	TRUE	0.620749	2	0.198857	FALSE	10.3716	19.1192	-7.54566	FALSE	FALSE	21	0.00970874	6.6865	4.823	0.00809031
1508	108	68	O	40	157	193	131	5.08	3.69	0	ralt	FALSE	0.692836	2	0.174571	FALSE	6.89643	3.87609	-5.10693	FALSE	FALSE	19	0.00961538	6.70044	4.83563	0.0103502
1509	108	69	I	20	75	124	89	4.61	4.54	1	ralt	TRUE	0.675932	2	0.0908571	FALSE	12.8664	26.6286	-3.17755	FALSE	FALSE	17	0.0571429	4.12928	4.82796	0.00607348
1510	108	70	O	40	3	121	112	3.77	5.22	0	lalt	TRUE	0.547042	2	0	FALSE	5.9333	-12.9936	1.87506	FALSE	FALSE	21	0.0188679	5.72792	4.83352	0.00372839
1511	108	71	O	40	157	193	131	5.24	3.82	0	ralt	FALSE	0.768108	2	0.111714	FALSE	6.42711	10.0378	-11.5119	FALSE	FALSE	19	0.0186916	5.74147	4.83909	0.00553087
1512	108	72	D	40	157	193	131	4.29	5.27	0	ralt	FALSE	1.27715	2	0.376286	FALSE	8.2424	11.5473	-15.4982	FALSE	FALSE	7	0.00925926	6.75489	4.85162	0.00773117
1513	108	73	T	80	157	193	131	3.96	4.52	1	ralt	TRUE	0.846185	2	0.198286	FALSE	13.268	-0.0747957	-2.91284	FALSE	FALSE	31	0.0366972	4.76818	4.8494	0.0063427
1514	108	74	T	80	3	121	112	5.44	4.83	0	lalt	TRUE	0.291321	2	0.0245714	FALSE	18.1021	12.1497	-2.57878	FALSE	FALSE	33	0.00909091	6.78136	4.86185	0.00628774
1515	108	75	R	80	138	154	91	5.41	4.39	1	ralt	TRUE	0.639325	2	0.0737143	FALSE	4.50433	-10.0729	-0.135279	FALSE	FALSE	28	0.0990991	3.33498	4.8477	0.00531167
1516	108	76	O	40	3	121	112	4.23	4.97	0	lalt	TRUE	0.408382	2	0.200857	FALSE	6.82804	-3.33915	2.94933	FALSE	FALSE	21	0.0267857	5.22239	4.84915	0.00225921
1517	108	77	T	80	157	193	131	4.87	4.22	1	lalt	FALSE	0.738451	2	0.109143	FALSE	-3.94438	-14.0458	15.6926	FALSE	FALSE	31	0.0442478	4.49825	4.84494	0.00287154
1518	108	78	T	80	157	193	131	3.55	4.7	1	ralt	TRUE	0.568562	2	0.109143	FALSE	0.138037	-15.4	-0.551444	FALSE	FALSE	31	0.0526316	4.24793	4.83881	0.00423663
1519	108	79	O	40	0	168	107	4.42	3.74	1	ralt	TRUE	1.12968	2	0.214857	FALSE	12.5937	-7.80165	-5.94575	FALSE	FALSE	20	0.0521739	4.26053	4.8329	0.00174948
1520	108	80	A	20	76	154	68	4.89	3.94	1	ralt	TRUE	0.912761	2	0.103143	FALSE	0.854753	12.757	-7.05828	FALSE	FALSE	0	0.0603448	4.05063	4.82542	0.00160317
1521	108	81	O	40	0	168	107	4.2	3.6	1	lalt	FALSE	0.489884	2	0.111429	FALSE	0.841458	-10.0853	1.68577	FALSE	FALSE	20	0.0598291	4.06301	4.81818	0.00145931
1522	108	82	D	40	3	121	112	5.06	4.72	1	ralt	TRUE	0.649091	2	0	FALSE	-15.8154	-6.37894	15.071	FALSE	FALSE	9	0.0677966	3.88264	4.80964	0.00134936
1523	108	83	A	20	76	154	68	4.12	4.41	1	ralt	TRUE	0.590099	2	0.110286	FALSE	-8.72701	3.11161	-1.32053	FALSE	FALSE	0	0.0672269	3.89482	4.80135	0.0012412
1524	108	84	A	20	76	154	68	3.78	4.82	1	ralt	TRUE	0.361316	2	0.117143	FALSE	-8.3919	-31.8578	9.22408	FALSE	FALSE	0	0.075	3.73697	4.79196	0.00256015
1525	108	85	T	80	157	193	131	3.62	4.66	1	lalt	FALSE	1.07735	2	0.204	FALSE	-2.98455	-15.4082	2.29498	FALSE	FALSE	31	0.0578512	4.11151	4.78562	0.00124499
1526	108	86	O	40	0	168	107	4.09	4.79	1	ralt	TRUE	0.773482	2	0.110571	FALSE	-0.204825	3.61897	-6.5439	FALSE	FALSE	20	0.0655738	3.93074	4.77802	0.00131203
1527	108	87	D	40	75	124	89	4.08	4.07	0	lalt	TRUE	0.602595	2	0.0122857	FALSE	11.6275	-12.7468	-0.328172	FALSE	FALSE	11	0.00813008	6.94251	4.79103	0.00500333
1528	108	88	I	20	75	124	89	3.5	5.05	1	ralt	TRUE	1.3147	2	0.122571	FALSE	-7.00557	-10.4404	6.51279	FALSE	FALSE	17	0.0564516	4.14684	4.78513	0.00505951
1529	108	89	O	40	75	124	89	4.54	5.49	0	lalt	TRUE	0.93882	2	0.171429	FALSE	-0.358378	-9.69275	-6.88666	FALSE	FALSE	23	0.016	5.96578	4.79207	0.0030755
1530	108	90	T	80	0	168	107	3.76	5.2	0	lalt	TRUE	0.790727	2	0.212857	FALSE	8.11963	-8.58158	18.3327	FALSE	FALSE	32	0.00793651	6.97728	4.80493	0.00666564
1531	108	91	I	20	0	168	107	4.87	5.09	0	ralt	FALSE	1.06288	2	0.221714	FALSE	5.42721	-3.51468	-4.03609	FALSE	FALSE	14	0.015748	5.98868	4.81179	0.00661498
1532	108	92	R	80	76	154	68	5.31	4.72	0	lalt	TRUE	0.931846	2	0.0977143	FALSE	-15.0883	-14.3976	1.52072	FALSE	FALSE	24	0.015625	6	4.81862	0.00466499
1533	108	93	O	40	76	154	68	5.37	5.2	0	lalt	TRUE	1.23183	2	0.206286	FALSE	-2.65608	2.84848	18.3071	FALSE	FALSE	18	0.0155039	6.01123	4.82544	0.00463046
1534	108	94	R	80	0	168	107	3.53	4.15	0	lalt	TRUE	0.933752	2	0.112571	FALSE	5.82455	5.0579	-13.0339	FALSE	FALSE	26	0.0153846	6.02237	4.83223	0.00459643
1535	108	95	D	40	157	193	131	3.8	4.08	0	lalt	TRUE	0.400025	2	0.114571	FALSE	0.802661	6.6987	-12.3295	FALSE	FALSE	7	0.0152672	6.03342	4.83901	0.0045629
1536	108	96	I	20	75	124	89	4.87	3.72	1	ralt	TRUE	1.34911	2	0.106	FALSE	7.44507	-1.2508	-8.78152	FALSE	FALSE	17	0.0606061	4.04439	4.83242	0.00283389
1537	108	97	D	40	3	121	112	5.42	3.92	1	ralt	TRUE	0.441244	2	0.109714	FALSE	11.7071	27.0386	8.67646	FALSE	FALSE	9	0.0676692	3.88536	4.82482	0.00106132
1538	108	98	A	20	157	193	131	4.09	3.67	0	lalt	TRUE	0.476263	2	0.0948571	FALSE	15.4969	-8.34161	-0.395514	FALSE	FALSE	1	0.00746269	7.06609	4.83733	0.00454114
1539	108	99	T	80	3	121	112	3.55	4.52	0	lalt	TRUE	0.96243	2	0.111714	FALSE	-0.810755	-9.03882	2.79815	FALSE	FALSE	33	0.0148148	6.07682	4.84419	0.00623582
1540	108	100	T	80	157	193	131	3.81	5.06	1	ralt	TRUE	0.539673	2	0.106857	FALSE	6.42767	-16.1164	-2.58189	FALSE	FALSE	31	0.0588235	4.08746	4.83807	0.00275587
1541	108	101	I	20	75	124	89	4.77	5.08	1	ralt	TRUE	0.6417	2	0.227143	FALSE	-3.10945	-8.80557	-4.76323	FALSE	FALSE	17	0.0656934	3.92811	4.83096	0.00103517
1542	108	102	T	80	157	193	131	3.92	5.41	1	ralt	TRUE	1.24875	2	0.870571	TRUE	1.63659	-8.33999	-0.109502	FALSE	FALSE	31	0.0652174	3.9386	4.82402	0.000961959
1543	108	103	R	80	3	121	112	3.87	5.23	0	ralt	FALSE	1.24075	2	0.212857	FALSE	14.7411	10.9871	2.78876	FALSE	FALSE	27	0.0215827	5.53398	4.82757	0.00195702
1544	108	104	A	20	76	154	68	3.92	5.41	1	ralt	TRUE	1.2378	2	0	FALSE	3.26726	14.2634	-12.6494	FALSE	FALSE	0	0.0714286	3.80735	4.81988	0.00189106
1545	108	105	O	40	0	168	107	4.98	4.74	1	lalt	FALSE	0.777793	2	0.219714	FALSE	-4.03532	-12.5643	-0.612818	FALSE	FALSE	20	0.0638298	3.96963	4.81338	0.000892022
1546	108	106	I	20	75	124	89	3.86	3.83	1	ralt	TRUE	0.595824	2	0.110857	FALSE	6.49206	7.22371	-11.2927	FALSE	FALSE	17	0.0704225	3.82782	4.80604	0.000886797
1547	108	107	R	80	75	124	89	3.56	5.07	0	lalt	TRUE	0.694084	2	0.100286	FALSE	3.65469	12.935	-8.84397	FALSE	FALSE	29	0.013986	6.15987	4.8133	0.00251258
1548	108	108	I	20	75	124	89	4.22	5.24	1	ralt	TRUE	0.408154	2	0.034	FALSE	10.8947	-10.3585	-5.84508	FALSE	FALSE	17	0.0763889	3.71049	4.80529	0.00245368
1549	108	109	O	40	76	154	68	4.78	5.33	0	ralt	FALSE	0.779258	2	0	FALSE	7.86998	2.68269	53.6702	FALSE	FALSE	18	0.0206897	5.59495	4.80925	0.00178894
1550	108	110	D	40	138	154	91	5.28	4.37	0	lalt	TRUE	0.669244	2	0.0948571	FALSE	6.94145	-11.2591	-12.8952	FALSE	FALSE	10	0.0136986	6.18982	4.81655	0.00346829
1551	108	111	A	20	157	193	131	4.56	4.07	0	lalt	TRUE	1.08717	2	0	FALSE	8.16118	21.1646	-25.367	FALSE	FALSE	1	0.0136054	6.19967	4.82382	0.00408589
1552	108	112	T	80	76	154	68	5.5	4.07	0	lalt	TRUE	0.736378	2	0.119429	FALSE	-2.14961	-14.4904	6.36025	FALSE	FALSE	30	0.00675676	7.20945	4.83612	0.00570441
1553	108	113	T	80	138	154	91	5.13	3.72	0	lalt	TRUE	0.963403	2	0.238571	FALSE	1.3682	-1.61302	4.12938	FALSE	FALSE	34	0.0134228	6.21917	4.84329	0.00566726
1554	108	114	T	80	157	193	131	4.73	4.57	1	lalt	FALSE	0.897478	2	0.103714	FALSE	-1.31082	-1.36043	-2.27336	FALSE	FALSE	31	0.0666667	3.90689	4.83666	0.00240237
1555	108	115	O	40	75	124	89	4.99	5.45	0	lalt	TRUE	0.779512	2	0.101143	FALSE	2.09366	-4.47052	21.9599	FALSE	FALSE	23	0.0198675	5.65344	4.84063	0.00176413
1556	108	116	A	20	76	154	68	3.65	4.53	1	ralt	TRUE	0.349538	2	0.01	FALSE	5.75611	-14.1819	12.226	FALSE	FALSE	0	0.0723684	3.7885	4.83337	0.00171311
1557	108	117	R	80	138	154	91	5.35	3.69	1	ralt	TRUE	0.399695	2	0.0522857	FALSE	10.8991	0.489804	-12.07	FALSE	FALSE	28	0.0784314	3.67243	4.82548	0.000670677
1558	108	118	R	80	3	121	112	4.31	5.4	0	lalt	TRUE	0.284776	2	0.116286	FALSE	10.1222	-13.1447	-12.6591	FALSE	FALSE	27	0.025974	5.26679	4.82729	0.0013334
1559	108	119	T	80	157	193	131	5.24	5.45	1	ralt	TRUE	0.883833	2	0.0105714	FALSE	-4.75877	-35.7996	13.3309	FALSE	FALSE	31	0.0709677	3.81669	4.82043	0.00135875
1560	108	120	I	20	138	154	91	4.88	3.96	0	ralt	FALSE	1.06851	3	0.118857	FALSE	-0.262842	-4.25343	9.21209	FALSE	FALSE	16	0.00641026	7.2854	4.83261	0.00383723
1561	108	121	D	40	3	121	112	4.49	4.13	1	ralt	TRUE	0.274697	3	0.109143	FALSE	1.4729	2.57061	-1.23084	FALSE	FALSE	9	0.0636943	3.97269	4.82675	0.00385273
1562	108	122	T	80	75	124	89	4.82	4.97	0	lalt	TRUE	0.9508	3	0.222571	FALSE	1.75671	-0.0435472	-3.80355	FALSE	FALSE	35	0.00632911	7.30378	4.83886	0.00382923
1563	108	123	D	40	157	193	131	4.03	4.43	0	lalt	TRUE	0.318848	3	0.211429	FALSE	7.25073	11.6452	-14.3932	FALSE	FALSE	7	0.0188679	5.72792	4.84308	0.00472859
1564	108	124	R	80	138	154	91	5.02	5.39	1	ralt	TRUE	1.13803	3	0	FALSE	4.00584	-10.9066	-1.35234	FALSE	FALSE	28	0.08125	3.62149	4.83519	0.00157454
1565	108	125	D	40	157	193	131	4.22	5.17	0	lalt	TRUE	1.08789	3	0.101429	FALSE	3.13814	-18.6112	18.234	FALSE	FALSE	7	0.0248447	5.33092	4.83724	0.00125373
1566	108	126	I	20	3	121	112	4.04	4.75	0	lalt	TRUE	0.581953	3	0.105143	FALSE	0.381112	-10.5394	16.2183	FALSE	FALSE	15	0.0123457	6.33985	4.84457	0.00283
1567	108	127	T	80	76	154	68	4.28	4.19	0	lalt	TRUE	0.66406	3	0	FALSE	5.23385	0.971265	-4.0585	FALSE	FALSE	30	0.0122699	6.34873	4.85187	0.00369907
1568	108	128	T	80	0	168	107	4.43	4.92	0	lalt	TRUE	0.601203	3	0	FALSE	3.22461	3.42382	-9.79058	FALSE	FALSE	32	0.0121951	6.35755	4.85913	0.0036773
1569	108	129	T	80	138	154	91	5.09	4.76	0	lalt	TRUE	0.969238	3	0.225714	FALSE	-0.579162	-16.207	12.0455	FALSE	FALSE	34	0.0181818	5.78136	4.8634	0.00308509
1570	108	130	T	80	157	193	131	3.76	4.8	1	ralt	TRUE	0.847239	3	0.144857	FALSE	6.09764	-1.00052	-4.52231	FALSE	FALSE	31	0.0722892	3.79008	4.85665	0.00154818
1571	108	131	R	80	157	193	131	3.96	4.45	0	lalt	TRUE	0.844366	3	0.107143	FALSE	11.4186	5.73244	2.71965	FALSE	FALSE	25	0.0179641	5.79874	4.86099	0.00153959
1572	108	132	T	80	76	154	68	4.96	4.18	0	lalt	TRUE	0.724482	3	0.123714	FALSE	1.94291	-4.38413	0.498155	FALSE	FALSE	30	0.0178571	5.80735	4.86533	0.0024716
1573	108	133	I	20	75	124	89	3.99	5.47	1	ralt	TRUE	0.629554	3	0.100857	FALSE	4.41759	-10.4609	-2.48379	FALSE	FALSE	17	0.0710059	3.81592	4.85883	0.00152269
1574	108	134	R	80	75	124	89	3.85	5.33	0	lalt	TRUE	0.727612	3	0.168857	FALSE	7.77174	5.35667	-11.392	FALSE	FALSE	29	0.0176471	5.82443	4.86323	0.00151437
1575	108	135	D	40	75	124	89	4.42	4.96	0	lalt	TRUE	0.333707	3	0.110286	FALSE	12.0406	-8.46859	1.41578	FALSE	FALSE	11	0.0116959	6.41785	4.87048	0.00298105
1576	108	136	D	40	76	154	68	5.24	4.73	0	lalt	TRUE	0.320774	3	0.0365714	FALSE	8.4865	7.47495	-3.9089	FALSE	FALSE	6	0.0174419	5.8413	4.87486	0.00296439
1577	108	137	A	20	76	154	68	4.03	3.68	1	lalt	FALSE	0.434709	3	0.128	FALSE	6.51166	7.81335	-14.4685	FALSE	FALSE	0	0.0693642	3.84967	4.86866	0.00148996
1578	108	138	A	20	75	124	89	4.08	4.5	0	lalt	TRUE	0.48895	3	0.153143	FALSE	1.87567	15.5568	-9.51384	FALSE	FALSE	5	0.00574713	7.44294	4.88021	0.00342399
1579	108	139	A	20	76	154	68	3.91	3.58	1	ralt	TRUE	0.566154	3	0.29	FALSE	13.9966	-0.931145	21.4726	FALSE	FALSE	0	0.0742857	3.75077	4.8735	0.00338013
1580	108	140	R	80	157	193	131	3.66	4.21	0	lalt	TRUE	0.53539	3	0.0637143	FALSE	4.83575	-3.70133	-8.92621	FALSE	FALSE	25	0.0227273	5.45943	4.87589	0.00115615
1581	108	141	T	80	157	193	131	4.21	5.47	1	ralt	TRUE	0.409526	3	0	FALSE	4.44306	-4.19103	-1.29995	FALSE	FALSE	31	0.0734463	3.76717	4.86938	0.00115017
1582	108	142	I	20	76	154	68	3.56	5.25	0	lalt	TRUE	1.08959	3	0	FALSE	0.632757	17.8396	-1.68304	FALSE	FALSE	12	0.0168539	5.89077	4.8739	0.00142644
1583	108	143	A	20	76	154	68	4.96	4.1	1	ralt	TRUE	0.464652	3	0	FALSE	-2.97142	5.48894	-8.07623	FALSE	FALSE	0	0.0782123	3.67646	4.86699	0.00139803
1584	108	144	O	40	76	154	68	5.03	5.02	0	lalt	TRUE	0.938679	3	0	FALSE	1	5.95045	3.45601	FALSE	FALSE	18	0.0222222	5.49185	4.86954	0.00111174
1585	108	145	A	20	75	124	89	4.77	5.07	0	lalt	TRUE	0.957732	3	0.102857	FALSE	4.94921	-1.85514	-2.82592	FALSE	FALSE	5	0.0110497	6.49985	4.8768	0.00254487
1586	108	146	T	80	157	193	131	3.56	4.18	1	lalt	FALSE	0.856753	3	0.181714	FALSE	2.09133	-11.8108	8.7552	FALSE	FALSE	31	0.0769231	3.70044	4.87012	0.00189426
1587	108	147	T	80	3	121	112	3.56	5.38	0	lalt	TRUE	0.350977	3	0.0614286	FALSE	4.97784	-3.96131	1.22385	FALSE	FALSE	33	0.0163934	5.93074	4.87473	0.00136956
1588	108	148	T	80	75	124	89	5.38	5.38	0	lalt	TRUE	0.32307	3	0.104571	FALSE	0.154122	-12.0372	7.8794	FALSE	FALSE	35	0.0108696	6.52356	4.88197	0.00277804
1589	108	149	O	40	0	168	107	4.97	4.54	1	lalt	FALSE	0.888966	3	0.231714	FALSE	4.58897	1.6345	-5.26829	FALSE	FALSE	20	0.0540541	4.20945	4.878	0.00196995
1590	108	150	A	20	76	154	68	4.1	5.02	1	ralt	TRUE	0.303111	3	0.107429	FALSE	1.94236	-5.10274	5.86413	FALSE	FALSE	0	0.0806452	3.63227	4.87111	0.000542023
1591	108	151	O	40	75	124	89	4.43	4.86	0	lalt	TRUE	0.645194	3	0.084	FALSE	16.4616	11.2165	-6.25995	FALSE	FALSE	23	0.0213904	5.54689	4.87384	0.00105608
1592	108	152	I	20	138	154	91	4.37	4.01	0	lalt	TRUE	1.11321	3	0.0662857	FALSE	2.27004	17.8822	-5.51229	FALSE	FALSE	16	0.0106383	6.55459	4.8811	0.00245377
1593	108	153	O	40	0	168	107	5.41	4.23	1	ralt	TRUE	1.02432	3	0.289429	FALSE	1.34035	-7.77715	2.72528	FALSE	FALSE	20	0.0582011	4.10281	4.87669	0.00189776
1594	108	154	A	20	0	168	107	3.54	5.47	0	lalt	TRUE	0.461383	3	0.115714	FALSE	13.6733	0.591373	-8.77143	FALSE	FALSE	2	0.0157895	5.98489	4.88137	0.00139224
1595	108	155	O	40	0	168	107	5.38	4.18	1	ralt	TRUE	1.35743	3	0.105143	FALSE	1.33697	6.77814	-3.59586	FALSE	FALSE	20	0.0628272	3.99247	4.87646	0.00135849
1596	108	156	T	80	157	193	131	5.02	4.14	1	ralt	TRUE	0.366482	3	0.108286	FALSE	5.463	4.08084	1.35542	FALSE	FALSE	31	0.078125	3.67807	4.87002	0.000468963
1597	108	157	O	40	138	154	91	4.3	3.68	0	lalt	TRUE	0.401594	3	0.122	FALSE	-5.39457	-11.4042	9.81198	FALSE	FALSE	22	0.0207254	5.59246	4.8729	0.0010259
1598	108	158	T	80	76	154	68	3.77	3.63	0	lalt	TRUE	0.708772	3	0.0722857	FALSE	11.0784	17.3009	-18.9004	FALSE	FALSE	30	0.0206186	5.59991	4.8758	0.00163586
1599	108	159	D	40	3	121	112	4.23	4.68	1	ralt	TRUE	0.398923	3	0.122	FALSE	-6.39731	-1.99225	8.83972	FALSE	FALSE	9	0.0564103	4.1479	4.87178	0.00110101
1600	108	160	O	40	0	168	107	5.31	5.27	1	ralt	TRUE	0.885024	3	0.218571	FALSE	14.8477	12.2881	0.51243	FALSE	FALSE	20	0.0663265	3.91427	4.86666	0.00052308
1601	108	161	R	80	138	154	91	4.43	3.79	1	ralt	TRUE	0.345051	3	0.12	FALSE	1.67742	4.15283	2.5941	FALSE	FALSE	28	0.071066	3.8147	4.86111	0.000453466
1602	108	162	I	20	75	124	89	3.54	3.75	1	ralt	TRUE	0.556186	3	0.234571	FALSE	0.763309	-6.94648	-12.0916	FALSE	FALSE	17	0.0656566	3.92892	4.85617	0.000451561
1603	108	163	T	80	157	193	131	3.91	4.03	1	ralt	TRUE	0.846402	3	0.136286	FALSE	0.356096	4.24032	3.81855	FALSE	FALSE	31	0.080402	3.63662	4.84987	0.000418836
1604	108	164	R	80	76	154	68	4.82	4.58	0	lalt	TRUE	0.79656	3	0.112286	FALSE	7.32711	-6.57259	8.39608	FALSE	FALSE	24	0.015	6.05889	4.85482	0.00122974
1605	108	165	I	20	76	154	68	4.01	4.12	0	lalt	TRUE	0.534629	3	0.219429	FALSE	-5.76665	5.00009	-9.25385	FALSE	FALSE	12	0.0199005	5.65105	4.85796	0.00183179
1606	108	166	A	20	3	121	112	4.96	3.82	0	lalt	TRUE	0.56981	3	0.439714	TRUE	-9.51775	-8.31853	4.38329	FALSE	FALSE	3	0.019802	5.65821	4.86109	0.0015743
1607	108	167	T	80	75	124	89	5.2	4.63	0	lalt	TRUE	0.322931	3	0.160286	FALSE	3.67902	-7.35113	16.7845	FALSE	FALSE	35	0.0147783	6.08037	4.86602	0.00181453
1608	108	168	I	20	75	124	89	4.58	3.54	1	ralt	TRUE	0.391002	3	0.218857	FALSE	7.94466	-4.96386	-5.32658	FALSE	FALSE	17	0.0686275	3.86507	4.86091	0.00123721
1609	108	169	R	80	138	154	91	3.57	5.04	1	lalt	FALSE	0.938135	3	0.23	FALSE	14.19	2.64722	-8.65577	FALSE	FALSE	28	0.0731707	3.77259	4.85542	0.000404356
1610	108	170	D	40	76	154	68	5.04	5	0	lalt	TRUE	0.414268	3	0.114571	FALSE	3.20317	0.181919	-8.1486	FALSE	FALSE	6	0.0194175	5.6865	4.85864	0.000966045
1611	108	171	I	20	0	168	107	4.56	3.68	0	lalt	TRUE	0.806275	3	0.117143	FALSE	12.1851	-9.22338	-4.41481	FALSE	FALSE	14	0.0144928	6.10852	4.86362	0.00178096
1612	108	172	T	80	0	168	107	4.18	5.2	0	lalt	TRUE	1.00839	3	0.184	FALSE	18.6586	4.83112	-9.99537	FALSE	FALSE	32	0.0144231	6.11548	4.86859	0.00201443
1613	108	173	A	20	75	124	89	5.01	4.34	0	lalt	TRUE	0.935429	3	0.0242857	FALSE	5.05471	-7.13154	-1.463	FALSE	FALSE	5	0.0143541	6.1224	4.87354	0.00200515
1614	108	174	O	40	0	168	107	4.88	4.53	1	ralt	TRUE	1.62242	3	0.277143	FALSE	16.0053	11.1485	-5.1285	FALSE	FALSE	20	0.0666667	3.90689	4.86874	0.00120395
1615	108	175	I	20	75	124	89	4.75	3.54	1	ralt	TRUE	0.344485	3	0.123429	FALSE	8.19434	-4.75496	3.07808	FALSE	FALSE	17	0.07109	3.81421	4.86356	0.000394806
1616	108	176	D	40	75	124	89	5.2	5.27	0	lalt	TRUE	0.44963	3	0.115143	FALSE	5.99252	4.49434	-19.399	FALSE	FALSE	11	0.0141509	6.14296	4.86856	0.00117783
1617	108	177	D	40	138	154	91	3.61	4.66	0	lalt	TRUE	0.455646	3	0.220857	FALSE	5.18958	4.98991	-7.76506	FALSE	FALSE	10	0.0140845	6.14975	4.87354	0.00196889
1618	108	178	D	40	3	121	112	5.1	3.91	1	ralt	TRUE	0.737783	3	0.0242857	FALSE	8.85504	-16.464	18.9673	FALSE	FALSE	9	0.0560748	4.1565	4.86995	0.00122074
1619	108	179	O	40	0	168	107	4.3	3.63	1	lalt	FALSE	0.558883	3	0.333714	FALSE	1.60448	7.55897	-22.1019	FALSE	FALSE	20	0.0697674	3.8413	4.86499	0.000426495
1620	108	180	D	40	0	168	107	4.87	5.38	0	lalt	TRUE	0.521194	4	0.114571	FALSE	16.9578	-2.83619	4.29421	FALSE	FALSE	8	0.00925926	6.75489	4.87227	0.00159387
1621	108	181	I	20	75	124	89	3.69	4.51	1	ralt	TRUE	0.489152	4	0.178286	FALSE	-0.138566	-9.94436	3.5738	FALSE	FALSE	17	0.0737327	3.76155	4.86699	0.00157362
1622	108	182	D	40	3	121	112	3.5	4.33	1	ralt	TRUE	0.520368	4	0.200857	FALSE	4.4127	7.07515	-14.0494	FALSE	FALSE	9	0.059633	4.06774	4.86311	0.000388288
1623	108	183	R	80	138	154	91	5.24	3.79	1	ralt	TRUE	0.349547	4	0.217143	FALSE	3.24846	0.444743	-13.0379	FALSE	FALSE	28	0.0730594	3.77479	4.85798	0.000386798
1624	108	184	I	20	3	121	112	5.41	4.72	0	lalt	TRUE	0.582675	4	0.117714	FALSE	11.8454	-11.6412	-2.66147	FALSE	FALSE	15	0.0136364	6.1964	4.86306	0.0011244
1625	108	185	O	40	157	193	131	5.26	3.82	0	lalt	TRUE	0.692653	4	0.293714	FALSE	-4.52236	-14.1555	7.0809	FALSE	FALSE	19	0.0135747	6.20294	4.86813	0.00190015
1626	108	186	D	40	3	121	112	5.08	4.59	1	ralt	TRUE	0.322793	4	0.106	FALSE	-4.12197	-12.9827	15.0623	FALSE	FALSE	9	0.0630631	3.98706	4.86397	0.0011425
1627	108	187	D	40	138	154	91	5.46	5.3	0	lalt	TRUE	0.23483	4	0.329143	FALSE	9.28563	-12.8237	3.58292	FALSE	FALSE	10	0.0179372	5.8009	4.86742	0.000912175
1628	108	188	R	80	138	154	91	4.97	3.62	1	ralt	TRUE	0.756718	4	0.19	FALSE	7.76567	-6.1327	-3.22085	FALSE	FALSE	28	0.0758929	3.71989	4.86215	0.000869639
1629	108	189	A	20	75	124	89	4.35	3.96	0	lalt	TRUE	0.548909	4	0.112286	FALSE	3.79161	2.44086	-4.49665	FALSE	FALSE	5	0.0177778	5.81378	4.86564	0.000866045
1630	108	190	D	40	75	124	89	4.73	3.58	0	lalt	TRUE	0.318011	4	0.218286	FALSE	8.51328	-5.97087	-6.3367	FALSE	FALSE	11	0.0176991	5.82018	4.86912	0.00141456
1631	108	191	D	40	3	121	112	4.3	3.78	1	ralt	TRUE	0.338247	4	0.114286	FALSE	-5.78203	-3.00217	2.0328	FALSE	FALSE	9	0.0660793	3.91966	4.86477	0.000882768
1632	108	192	I	20	3	121	112	3.89	5.09	0	lalt	TRUE	0.667417	4	0.230571	FALSE	9.00981	-2.92736	-3.82311	FALSE	FALSE	15	0.0175439	5.83289	4.86828	0.000879157
1633	108	193	A	20	76	154	68	5.28	3.52	1	ralt	TRUE	0.637485	4	0.105429	FALSE	3.00246	-9.46127	-1.71166	FALSE	FALSE	0	0.069869	3.8392	4.86363	0.000863045
1634	108	194	O	40	0	168	107	4.05	5.14	1	ralt	TRUE	1.03856	4	0.220571	FALSE	4.62335	7.47542	-8.00111	FALSE	FALSE	20	0.0695652	3.84549	4.85904	0.000328065
1635	108	195	A	20	138	154	91	3.81	3.81	0	lalt	TRUE	0.375653	4	0.347429	FALSE	6.99145	-6.46677	5.86355	FALSE	FALSE	4	0.012987	6.26679	4.86419	0.00107379
1636	108	196	R	80	0	168	107	5.27	3.76	0	lalt	TRUE	0.847836	4	0.126571	FALSE	-2.38212	0.691168	-8.89562	FALSE	FALSE	26	0.012931	6.27302	4.86931	0.00181311
1637	108	197	O	40	0	168	107	4.96	5.31	1	ralt	TRUE	1.17889	4	0.115429	FALSE	9.88627	8.49207	-7.10968	FALSE	FALSE	20	0.0729614	3.77672	4.86448	0.00105418
1638	108	198	I	20	75	124	89	4.4	4.77	1	ralt	TRUE	0.354905	4	0.228571	FALSE	2.541	1.30635	4.82732	FALSE	FALSE	17	0.0726496	3.7829	4.85971	0.000301699
1639	108	199	T	80	157	193	131	5.49	3.63	1	ralt	TRUE	0.77697	4	0.156571	FALSE	7.09549	14.4015	-3.82791	FALSE	FALSE	31	0.0723404	3.78905	4.85501	0.000300644
1640	108	200	R	80	138	154	91	4.79	4.7	1	ralt	TRUE	0.515011	4	0.313714	FALSE	-4.28664	3.43578	-7.6077	FALSE	FALSE	28	0.0762712	3.71272	4.85004	0.000290012
1641	108	201	T	80	0	168	107	3.73	4.48	0	lalt	TRUE	0.361126	4	0.102571	FALSE	1.08973	12.9786	-7.09704	FALSE	FALSE	32	0.0168776	5.88874	4.85371	0.000815573
1642	108	202	O	40	3	121	112	3.72	4.25	0	lalt	TRUE	0.798292	4	0.214	FALSE	15.9179	1.38654	-8.68304	FALSE	FALSE	21	0.0168067	5.89482	4.85738	0.00134624
1643	108	203	R	80	0	168	107	4.48	5.29	0	lalt	TRUE	0.80146	4	0.112	FALSE	-1.05607	-11.8405	3.35133	FALSE	FALSE	26	0.0167364	5.90087	4.86105	0.00134084
1644	108	204	A	20	157	193	131	3.84	4.91	0	lalt	TRUE	0.672482	4	0.227143	FALSE	17.3261	15.1969	-7.85195	FALSE	FALSE	1	0.0125	6.32193	4.86622	0.00154507
1645	108	205	A	20	76	154	68	4.43	3.61	1	ralt	TRUE	0.655591	4	0.113714	FALSE	11.987	2.80641	-10.9496	FALSE	FALSE	0	0.0705394	3.82543	4.86176	0.00102103
1646	108	206	O	40	0	168	107	4.6	4.23	1	ralt	TRUE	0.641747	4	0.215429	FALSE	4.40682	-19.1157	5.50703	FALSE	FALSE	20	0.0743802	3.74894	4.85703	0.000284103
1647	108	207	A	20	76	154	68	4.24	5.14	1	ralt	TRUE	0.57683	4	0.133714	FALSE	0.426377	0.0997396	-1.79242	FALSE	FALSE	0	0.0740741	3.75489	4.85237	0.000273832
1648	108	208	D	40	0	168	107	4.91	4.95	0	lalt	TRUE	0.373926	4	0.154571	FALSE	4.60071	5.02961	-5.59727	FALSE	FALSE	8	0.0122951	6.34577	4.85759	0.000999861
1649	108	209	I	20	75	124	89	3.56	5.25	1	ralt	TRUE	1.22283	4	0.221714	FALSE	2.44195	4.29231	-14.2615	FALSE	FALSE	17	0.0734694	3.76671	4.853	0.000995994
1650	108	210	T	80	75	124	89	4.86	4.32	0	lalt	TRUE	0.456039	4	0.187714	FALSE	1.40681	-4.26092	6.31489	FALSE	FALSE	35	0.0162602	5.94251	4.85675	0.000787664
1651	108	211	D	40	3	121	112	3.92	5.48	1	ralt	TRUE	0.322145	4	0	FALSE	-0.00773675	-22.712	3.23826	FALSE	FALSE	9	0.0647773	3.94837	4.85292	0.000804117
1652	108	212	I	20	75	124	89	5.05	5.24	1	lalt	FALSE	0.948176	4	0.349714	FALSE	-7.69505	-3.38209	11.8636	FALSE	FALSE	17	0.0766129	3.70627	4.84818	0.00028048
1653	108	213	D	40	0	168	107	4.65	5.14	0	lalt	TRUE	0.416196	4	0.0965714	FALSE	15.8345	19.9375	-11.4522	FALSE	FALSE	8	0.0160643	5.96	4.85197	0.000770634
1654	108	214	T	80	157	193	131	4.76	4.93	1	ralt	TRUE	0.696191	4	0	FALSE	11.5843	5.62771	-5.86196	FALSE	FALSE	31	0.072	3.79586	4.84762	0.000775861
1655	108	215	R	80	75	124	89	5.49	5.16	0	lalt	TRUE	0.386271	4	0.212286	FALSE	-5.52733	3.63996	3.96206	FALSE	FALSE	29	0.0159363	5.97154	4.85142	0.000772965
1656	108	216	I	20	75	124	89	4.2	4.11	1	ralt	TRUE	0.480239	4	0.114286	FALSE	5.20936	7.43867	5.7881	FALSE	FALSE	17	0.0793651	3.65535	4.84657	0.000754787
1657	108	217	I	20	0	168	107	4.08	4.41	0	lalt	TRUE	0.343376	4	0.219143	FALSE	8.38153	7.90118	-4.4064	FALSE	FALSE	14	0.0158103	5.98299	4.8504	0.000751994
1658	108	218	O	40	0	168	107	4.97	3.74	1	ralt	TRUE	1.00051	4	0.115714	FALSE	8.18252	13.1056	-10.991	FALSE	FALSE	20	0.0748031	3.74076	4.84591	0.000756421
1659	108	219	D	40	3	121	112	5.03	4.5	1	ralt	TRUE	0.51964	4	0.115714	FALSE	-0.226796	6.3965	-8.53272	FALSE	FALSE	9	0.0666667	3.90689	4.84209	0.000264103
1660	108	220	D	40	3	121	112	4.29	3.93	1	ralt	TRUE	0.55568	4	0.0985714	FALSE	9.6615	3.7022	-10.6032	FALSE	FALSE	9	0.0703125	3.83007	4.83801	0.000592035
1661	108	221	R	80	138	154	91	3.88	4.51	1	ralt	TRUE	0.474857	4	0	FALSE	1.41802	-9.85844	6.65608	FALSE	FALSE	28	0.07393	3.7577	4.83369	0.000253595
1662	108	222	D	40	3	121	112	4.99	3.75	1	ralt	TRUE	0.374018	4	0	FALSE	4.53277	17.7793	-8.37625	FALSE	FALSE	9	0.0736434	3.7633	4.82942	0.000244923
1663	108	223	T	80	157	193	131	4.32	4.86	1	ralt	TRUE	1.02009	4	0.227714	FALSE	1.15989	0.29114	13.5135	FALSE	FALSE	31	0.0733591	3.76888	4.82521	0.000244147
1664	108	224	A	20	76	154	68	4.21	3.98	1	ralt	TRUE	0.359188	4	0.115429	FALSE	-8.18243	0.475022	-5.02285	FALSE	FALSE	0	0.0730769	3.77444	4.82105	0.000243376
1665	108	225	T	80	157	193	131	5.07	3.64	1	ralt	TRUE	0.291347	4	0.00742857	FALSE	13.5503	29.3229	-14.227	FALSE	FALSE	31	0.0766284	3.70598	4.81667	0.000235604
1666	108	226	O	40	157	193	131	4.54	4.23	0	lalt	TRUE	1.03044	4	0	FALSE	15.9251	13.8006	-8.51559	FALSE	FALSE	19	0.0152672	6.03342	4.82067	0.000727754
1667	108	227	R	80	138	154	91	4.99	3.66	1	ralt	TRUE	0.728542	4	0	FALSE	8.18444	9.03469	-6.09312	FALSE	FALSE	28	0.0760456	3.71699	4.81637	0.000725156
1668	108	228	A	20	76	154	68	3.91	3.64	1	ralt	TRUE	0.320678	4	0.181143	FALSE	-6.65372	5.51477	4.72646	FALSE	FALSE	0	0.0757576	3.72247	4.81212	0.000226484
1669	108	229	A	20	0	168	107	4.38	3.98	0	lalt	TRUE	0.441846	4	0	FALSE	2.66824	-6.79866	-3.80842	FALSE	FALSE	2	0.0150943	6.04985	4.81615	0.000720016
1670	108	230	A	20	138	154	91	5.07	4.21	0	lalt	TRUE	1.33199	4	0.115714	FALSE	-6.04601	-9.92204	6.60247	FALSE	FALSE	4	0.0150376	6.05528	4.82018	0.00120985
1671	108	231	T	80	138	154	91	4.17	4.47	0	lalt	TRUE	0.401099	4	0.112857	FALSE	3.03954	-1.45816	0.260777	FALSE	FALSE	34	0.0149813	6.0607	4.82419	0.00120549
1672	108	232	R	80	76	154	68	3.71	5.06	0	lalt	TRUE	0.7312	4	0.11	FALSE	6.17368	6.70874	-0.890756	FALSE	FALSE	24	0.0149254	6.06609	4.8282	0.00120116
1673	108	233	I	20	138	154	91	4.11	4.7	0	lalt	TRUE	1.54225	4	0.122	FALSE	10.1744	5.82957	1.48871	FALSE	FALSE	16	0.0111524	6.4865	4.83355	0.00138393
1674	108	234	I	20	138	154	91	3.92	5.39	0	lalt	TRUE	0.726335	4	0.245429	FALSE	9.46344	1.10944	-11.6621	FALSE	FALSE	16	0.0148148	6.07682	4.83753	0.00291047
1675	108	235	T	80	3	121	112	3.59	5.18	0	lalt	TRUE	0.471415	4	0	FALSE	-4.47197	-2.7209	-12.0337	FALSE	FALSE	33	0.0147601	6.08215	4.8415	0.00118835
1676	108	236	D	40	3	121	112	5.21	4.52	1	ralt	TRUE	0.316554	4	0.121143	FALSE	16.4748	21.6573	-7.11792	FALSE	FALSE	9	0.0735294	3.76553	4.83744	0.000702583
1677	108	237	I	20	157	193	131	4.73	3.61	0	lalt	TRUE	1.10049	4	0.295143	FALSE	4.84362	4.41307	-6.93342	FALSE	FALSE	13	0.014652	6.09276	4.84142	0.000700161
1678	108	238	O	40	0	168	107	4.27	4.99	1	lalt	FALSE	0.950678	4	0.218857	FALSE	-4.5985	-7.12476	3.94474	FALSE	FALSE	20	0.0729927	3.7761	4.83743	0.000697756
1679	108	239	A	20	157	193	131	5.25	3.6	0	lalt	TRUE	0.91072	4	0.138	FALSE	11.9307	-3.02554	9.03706	FALSE	FALSE	1	0.0145455	6.10329	4.84142	0.000695367
1680	109	0	R	80	76	154	68	4.09	3.81	0	lalt	FALSE	1.21377	1	0.31	FALSE	9.54942	-0.730932	9.65574	FALSE	FALSE	24	0.0277778	5.16993	5.1554	0.0145257
1681	109	1	D	40	157	193	131	5.24	4.86	0	ralt	TRUE	1.38791	1	0.364286	FALSE	8.66318	6.80777	-11.8849	FALSE	FALSE	7	0.027027	5.20945	5.14266	0.0272606
1682	109	2	T	20	75	124	89	4.41	4.03	1	lalt	TRUE	0.881965	1	0.349429	FALSE	6.29422	9.77591	-6.25956	FALSE	FALSE	35	0.0263158	5.24793	5.13156	0.0266152
1683	109	3	O	40	75	124	89	4.53	5.5	0	ralt	TRUE	1.34002	1	0.488	TRUE	13.7987	-0.110064	-3.85544	FALSE	FALSE	23	0.025641	5.2854	5.12193	0.0259994
1684	109	4	R	80	138	154	91	4.73	4.03	1	ralt	FALSE	1.218	1	0.197714	FALSE	-3.57625	-14.3758	19.4615	FALSE	FALSE	28	0.025	5.32193	5.11365	0.0254112
1685	109	5	T	20	75	124	89	5.07	3.6	1	lalt	TRUE	1.60504	1	0.686	TRUE	3.11533	14.6485	1.3971	FALSE	FALSE	35	0.0487805	4.35755	5.08863	0.0190128
1686	109	6	T	20	76	154	68	4.08	3.75	0	ralt	TRUE	1.6491	1	0.717429	TRUE	7.25721	8.16652	0.782765	FALSE	FALSE	30	0.0238095	5.39232	5.08313	0.0186102
1687	109	7	R	80	138	154	91	4.55	4.73	1	ralt	FALSE	1.38124	1	0.534286	TRUE	0.0564843	2.58909	-6.30618	FALSE	FALSE	28	0.0465116	4.42626	5.06148	0.0182242
1688	109	8	I	80	138	154	91	4.53	4.21	0	ralt	TRUE	1.00531	1	0.359714	FALSE	-3.8378	-6.86937	5.01641	FALSE	FALSE	16	0.0227273	5.45943	5.0583	0.0178536
1689	109	9	T	20	75	124	89	4.77	4.66	1	lalt	TRUE	0.366387	1	0.877714	TRUE	-5.60258	-9.86715	0.936729	FALSE	FALSE	35	0.0666667	3.90689	5.02889	0.0154381
1690	109	10	T	20	76	154	68	5.42	3.89	0	lalt	FALSE	1.13348	1	0.315143	FALSE	-3.20221	-1.34725	3.54157	FALSE	FALSE	30	0.0434783	4.52356	5.01183	0.00992462
1691	109	11	O	40	0	168	107	3.65	4.4	1	ralt	FALSE	0.626573	1	0.511429	TRUE	-3.77875	3.1408	4.40067	FALSE	FALSE	20	0.0212766	5.55459	5.01184	0.0168263
1692	109	12	R	80	138	154	91	4.27	3.58	1	ralt	FALSE	1.41468	1	0.382857	FALSE	15.1717	11.4814	5.2845	FALSE	FALSE	28	0.0625	4	4.98706	0.0145759
1693	109	13	D	40	3	121	112	5.48	3.69	1	ralt	FALSE	0.706872	1	0.178	FALSE	4.34524	14.8399	-9.72822	FALSE	FALSE	9	0.0204082	5.61471	4.98876	0.0143093
1694	109	14	T	20	75	124	89	4.91	4.69	1	lalt	TRUE	0.895967	1	0.446	TRUE	-3.05025	-5.61462	-4.2043	FALSE	FALSE	35	0.08	3.64386	4.9594	0.0130618
1695	109	15	O	40	0	168	107	5.25	4.35	1	ralt	FALSE	1.15397	1	0.496	TRUE	-4.77545	11.1999	14.914	FALSE	FALSE	20	0.0392157	4.67243	4.94814	0.00811893
1696	109	16	A	20	76	154	68	5.49	5.5	1	ralt	FALSE	0.870014	1	0.777429	TRUE	8.42298	4.06614	-4.45732	FALSE	FALSE	0	0.0192308	5.70044	4.95208	0.0153518
1697	109	17	O	40	0	168	107	4.65	4.81	1	missing	FALSE		1	0.744	TRUE	5.8162	15.1729	-5.57307	TRUE	TRUE	20	0.0566038	4.14296	4.93332	0.0133328
1698	109	18	A	20	75	124	89	4.61	5.38	0	ralt	TRUE	1.03187	1	1	TRUE	2.53264	7.57989	-8.68206	FALSE	FALSE	5	0.0185185	5.75489	4.93837	0.0131089
1699	109	19	A	20	76	154	68	4.42	4.96	1	lalt	TRUE	1.01886	1	0.526286	TRUE	7.53874	2.01604	-2.06196	FALSE	FALSE	0	0.0363636	4.78136	4.93022	0.0145841
1700	109	20	I	80	157	193	131	4.93	4.39	1	lalt	TRUE	1.28792	1	0.692286	TRUE	2.50833	17.5802	-3.96742	FALSE	FALSE	13	0.0178571	5.80735	4.93606	0.0143449
1701	109	21	D	40	75	124	89	4.76	4.09	0	ralt	TRUE	1.62191	1	0.532286	TRUE	3.35601	-0.274702	-0.902594	FALSE	FALSE	11	0.0175439	5.83289	4.94213	0.0183394
1702	109	22	T	20	138	154	91	5.44	4.93	0	lalt	FALSE	1.10699	1	0.544857	TRUE	3.65184	14.1128	5.57975	FALSE	FALSE	34	0.0172414	5.85798	4.94842	0.0180436
1703	109	23	A	20	3	121	112	4.11	4.98	0	missing	FALSE		1	0.22	FALSE	8.60766	6.67663	-5.92868	TRUE	TRUE	3	0.0169492	5.88264	4.9549	0.0177571
1704	109	24	A	20	138	154	91	5.26	5	0	ralt	TRUE	0.434964	1	0.314	FALSE	9.67013	17.3562	-4.24157	FALSE	FALSE	4	0.0166667	5.90689	4.96157	0.0174795
1705	109	25	D	40	75	124	89	4.2	4.38	0	ralt	TRUE	1.45391	1	0.557429	TRUE	9.51518	5.75936	-6.27732	FALSE	FALSE	11	0.0327869	4.93074	4.95622	0.013257
1706	109	26	D	40	75	124	89	5.29	5.1	0	ralt	TRUE	0.903025	1	0.628	TRUE	13.8053	9.7048	-0.475878	FALSE	FALSE	11	0.0483871	4.36923	4.94364	0.0169495
1707	109	27	A	20	3	121	112	3.56	4.59	0	ralt	TRUE	1.10203	1	0.65	TRUE	1.75056	-7.42459	3.84143	FALSE	FALSE	3	0.031746	4.97728	4.93946	0.00755627
1708	109	28	O	40	76	154	68	5.25	4.83	0	ralt	TRUE	1.53814	1	0.583429	TRUE	4.03609	11.4925	-12.6941	FALSE	FALSE	18	0.015625	6	4.94738	0.0126796
1709	109	29	R	80	0	168	107	4.78	4.23	0	lalt	FALSE	0.807081	1	0.475714	TRUE	5.55369	-3.4314	-5.24128	FALSE	FALSE	26	0.0153846	6.02237	4.95539	0.0162119
1710	109	30	R	80	3	121	112	3.5	4.54	0	lalt	FALSE	1.51013	1	0.779143	TRUE	3.56962	4.04632	6.94844	FALSE	FALSE	27	0.0151515	6.04439	4.96349	0.0159801
1711	109	31	T	20	138	154	91	5.02	4.16	0	ralt	TRUE	0.67825	1	0.692286	TRUE	3.05781	5.93278	-0.453946	FALSE	FALSE	34	0.0298507	5.06609	4.96056	0.0121502
1712	109	32	I	80	157	193	131	4.36	3.95	1	lalt	TRUE	0.774396	1	0.241429	FALSE	6.83924	-0.66573	-0.47621	FALSE	FALSE	13	0.0294118	5.08746	4.95803	0.00843104
1713	109	33	O	40	0	168	107	5.01	4.83	1	lalt	TRUE	0.974534	1	0.351429	FALSE	8.33153	5.51426	-8.81288	FALSE	FALSE	20	0.057971	4.10852	4.94366	0.00624451
1714	109	34	D	40	3	121	112	4.2	4.17	1	ralt	FALSE	0.623502	1	0.537143	TRUE	4.66777	14.1285	-8.01065	FALSE	FALSE	9	0.0285714	5.12928	4.94202	0.00616506
1715	109	35	T	20	75	124	89	3.56	4.41	1	lalt	TRUE	1.00171	1	0.867143	TRUE	2.03678	4.65539	-10.9891	FALSE	FALSE	35	0.0704225	3.82782	4.9248	0.00565099
1716	109	36	R	80	0	168	107	3.54	3.73	0	lalt	FALSE	0.745888	1	0.830571	TRUE	7.56197	19.7057	-14.4987	FALSE	FALSE	26	0.0277778	5.16993	4.92402	0.00558138
1717	109	37	T	20	75	124	89	3.54	4.62	1	lalt	TRUE	0.787123	1	0.941429	TRUE	-1.7682	0.0536479	12.3469	FALSE	FALSE	35	0.0821918	3.60486	4.90479	0.00522345
1718	109	38	D	40	138	154	91	5.36	4.93	0	ralt	TRUE	0.688292	1	0.932	TRUE	2.25283	5.30729	0.170492	FALSE	FALSE	10	0.0135135	6.20945	4.91488	0.00842916
1719	109	39	T	20	75	124	89	5.06	4.16	1	ralt	FALSE	0.376329	1	0.105429	FALSE	4.04372	1.05339	9.00222	FALSE	FALSE	35	0.0933333	3.42146	4.89406	0.00812007
1720	109	40	D	40	3	121	112	4.19	5.38	1	lalt	TRUE	0.910329	1	1	TRUE	-0.403175	2.01644	-11.6088	FALSE	FALSE	9	0.0394737	4.66297	4.88836	0.00360761
1721	109	41	R	80	138	154	91	4.42	3.55	1	missing	FALSE		1	0.216	FALSE	3.33679	-1.97668	-0.402495	TRUE	TRUE	28	0.0519481	4.26679	4.87837	0.00444569
1722	109	42	T	20	138	154	91	4.83	4.85	0	ralt	TRUE	0.857475	1	0.593429	TRUE	4.03918	4.2342	-11.3967	FALSE	FALSE	34	0.0384615	4.70044	4.87348	0.00439555
1723	109	43	D	40	0	168	107	4.01	3.84	0	lalt	FALSE	0.746452	1	0.590857	TRUE	-2.1124	-1.53201	4.56062	FALSE	FALSE	8	0.0126582	6.30378	4.88451	0.009226
1724	109	44	D	40	3	121	112	4.19	4.91	1	ralt	FALSE	0.777705	1	0.557143	TRUE	15.0048	10.4783	-9.83423	FALSE	FALSE	9	0.05	4.32193	4.87561	0.00849421
1725	109	45	O	40	75	124	89	4.77	4.16	0	lalt	FALSE	0.836786	1	0.793429	TRUE	0.517428	-3.27239	2.75673	FALSE	FALSE	23	0.0246914	5.33985	4.87757	0.00540692
1726	109	46	A	20	0	168	107	3.85	4.11	0	ralt	TRUE	0.504912	1	0.547429	TRUE	10.2137	10.9287	-9.09073	FALSE	FALSE	2	0.0121951	6.35755	4.8888	0.0100502
1727	109	47	T	20	0	168	107	5.48	4.88	0	ralt	TRUE	0.89408	1	0.404857	TRUE	2.87194	10.623	-12.0837	FALSE	FALSE	32	0.0120482	6.37504	4.89996	0.0128536
1728	109	48	R	80	75	124	89	4.12	4.88	0	lalt	FALSE	1.06496	1	0.668	TRUE	12.6092	23.4915	5.91951	FALSE	FALSE	29	0.0119048	6.39232	4.91106	0.0127073
1729	109	49	T	20	75	124	89	3.84	5.08	1	lalt	TRUE	0.553164	1	0.389429	FALSE	8.13955	4.10029	-5.50983	FALSE	FALSE	35	0.0941176	3.40939	4.89269	0.00709133
1730	109	50	A	20	157	193	131	4.18	3.87	0	lalt	FALSE	1.06922	1	0.447143	TRUE	6.33473	10.8351	-11.9829	FALSE	FALSE	1	0.0116279	6.42626	4.90401	0.00701439
1731	109	51	R	80	75	124	89	3.61	3.55	0	lalt	FALSE	0.670425	1	0.732571	TRUE	3.45412	12.3704	-0.163207	FALSE	FALSE	29	0.0229885	5.44294	4.90668	0.00950231
1732	109	52	D	40	157	193	131	4.69	5.38	0	ralt	TRUE	0.779653	1	0.621143	TRUE	9.42212	-1.54512	-0.553082	FALSE	FALSE	7	0.0227273	5.45943	4.90947	0.00664574
1733	109	53	I	80	0	168	107	4.57	3.54	0	ralt	TRUE	0.80064	1	0.342857	FALSE	-0.560654	-2.65596	6.73213	FALSE	FALSE	14	0.011236	6.47573	4.92077	0.00929949
1734	109	54	I	80	75	124	89	3.58	4.35	0	lalt	FALSE	1.2908	1	0.999714	TRUE	1.86901	5.03687	-12.6673	FALSE	FALSE	17	0.0111111	6.49185	4.932	0.0118948
1735	109	55	T	20	0	168	107	3.72	3.86	0	lalt	FALSE	1.18394	1	0.693429	TRUE	-1.28285	-19.2589	26.2546	FALSE	FALSE	32	0.021978	5.50779	4.93495	0.00910513
1736	109	56	R	80	138	154	91	4.54	5.31	1	ralt	FALSE	0.425164	1	0.388571	FALSE	-8.16639	-1.84826	2.12553	FALSE	FALSE	28	0.0543478	4.20163	4.92569	0.00447555
1737	109	57	D	40	3	121	112	4.64	4.82	1	lalt	TRUE	0.960201	1	0.522857	TRUE	1.32961	-15.6121	-0.869077	FALSE	FALSE	9	0.0537634	4.21723	4.9168	0.00255196
1738	109	58	A	20	76	154	68	3.67	4.43	1	lalt	TRUE	1.06623	1	0.463429	TRUE	6.50623	3.17661	-5.35825	FALSE	FALSE	0	0.0319149	4.96963	4.91514	0.00339117
1739	109	59	O	40	76	154	68	4.33	4.51	0	ralt	TRUE	1.57834	1	0.409143	TRUE	-1.83491	-3.6613	-14.1003	FALSE	FALSE	18	0.0210526	5.56986	4.91879	0.00519966
1740	109	60	D	40	76	154	68	4.84	5.19	0	lalt	FALSE	1.00005	2	0.606571	TRUE	-4.00594	-11.3089	14.2023	FALSE	FALSE	6	0.0104167	6.58496	4.9303	0.00865295
1741	109	61	D	40	3	121	112	3.59	4.12	1	ralt	FALSE	0.609108	2	0.200286	FALSE	1.95225	2.12308	6.64181	FALSE	FALSE	9	0.0618557	4.01495	4.91987	0.00654599
1742	109	62	O	40	0	168	107	4.48	5.18	1	lalt	TRUE	0.602344	2	0.436571	TRUE	5.32712	0.772567	-13.5809	FALSE	FALSE	20	0.0510204	4.29278	4.91224	0.00222242
1743	109	63	I	80	157	193	131	4.86	3.54	1	ralt	FALSE	0.706395	2	0.444	TRUE	2.5809	-5.07338	3.4276	FALSE	FALSE	13	0.030303	5.04439	4.91146	0.00323722
1744	109	64	T	20	157	193	131	4.62	4.22	0	lalt	FALSE	0.553567	2	0.442857	TRUE	7.93421	3.376	-20.7291	FALSE	FALSE	31	0.01	6.64386	4.92317	0.00738425
1745	109	65	D	40	3	121	112	3.51	4.25	1	ralt	FALSE	0.840666	2	0.825429	TRUE	2.59645	-6.94567	1.7068	FALSE	FALSE	9	0.0693069	3.85086	4.91176	0.00614811
1746	109	66	D	40	3	121	112	5.44	5.14	1	lalt	TRUE	0.931854	2	0.452286	TRUE	-13.2393	-20.7982	18.5985	FALSE	FALSE	9	0.0784314	3.67243	4.89895	0.00339184
1747	109	67	D	40	3	121	112	4	3.97	1	lalt	TRUE	1.00979	2	0.708286	TRUE	10.0547	7.56755	-9.33414	FALSE	FALSE	9	0.0873786	3.51658	4.88499	0.00294025
1748	109	68	O	40	76	154	68	3.64	3.88	0	ralt	TRUE	0.729969	2	0.844	TRUE	-9.22483	-9.60457	12.2275	FALSE	FALSE	18	0.0288462	5.11548	4.88518	0.00254245
1749	109	69	R	80	138	154	91	4.03	5.36	1	ralt	FALSE	0.379214	2	0.727714	TRUE	-1.79564	14.3894	5.71908	FALSE	FALSE	28	0.0571429	4.12928	4.87703	0.00286735
1750	109	70	I	80	157	193	131	5.22	4.57	1	ralt	FALSE	0.459297	2	0.515429	TRUE	-2.10515	1.10451	-6.33344	FALSE	FALSE	13	0.0377358	4.72792	4.87414	0.00237094
1751	109	71	T	20	75	124	89	4.71	5.48	1	lalt	TRUE	0.61235	2	0.742	TRUE	-6.66824	-8.98401	-6.01861	FALSE	FALSE	35	0.0841121	3.57154	4.86143	0.00201139
1752	109	72	T	20	75	124	89	4.93	4.57	1	lalt	TRUE	0.566362	2	0.694857	TRUE	0.800164	0.0179616	-0.867239	FALSE	FALSE	35	0.0925926	3.43296	4.84774	0.00249893
1753	109	73	O	40	0	168	107	5.38	5.14	1	ralt	FALSE	0.721432	2	0.678571	TRUE	1.30395	-1.52076	-0.593475	FALSE	FALSE	20	0.0550459	4.18322	4.84072	0.00143039
1754	109	74	A	20	76	154	68	3.96	5.26	1	lalt	TRUE	1.22636	2	0.43	TRUE	3.0303	3.42413	-8.96395	FALSE	FALSE	0	0.0363636	4.78136	4.83874	0.00229447
1755	109	75	I	80	0	168	107	4	3.56	0	lalt	FALSE	1.01843	2	0.290857	FALSE	2.00435	12.1051	-4.06533	FALSE	FALSE	14	0.018018	5.79442	4.84455	0.00404522
1756	109	76	T	20	75	124	89	3.65	4.73	1	lalt	TRUE	0.628632	2	0.516571	TRUE	0.907067	-7.98032	-0.697506	FALSE	FALSE	35	0.0982143	3.34792	4.8308	0.00309759
1757	109	77	T	20	3	121	112	4.09	4.13	0	ralt	TRUE	0.527798	2	0.465429	TRUE	-11.655	-16.9243	10.5471	FALSE	FALSE	33	0.00884956	6.82018	4.84341	0.00522254
1758	109	78	R	80	138	154	91	4.35	4.94	1	lalt	TRUE	0.943942	2	0.350286	FALSE	4.39996	-0.0327463	-0.720612	FALSE	FALSE	28	0.0614035	4.02554	4.8355	0.00548161
1759	109	79	I	80	157	193	131	5.47	3.54	1	lalt	TRUE	0.772025	2	0.530286	TRUE	8.23908	3.75173	-3.21432	FALSE	FALSE	13	0.0434783	4.52356	4.8317	0.00180011
1760	109	80	I	80	3	121	112	4.96	3.63	0	lalt	FALSE	0.85212	2	0.438	TRUE	-11.9144	-22.1572	14.7342	FALSE	FALSE	15	0.00862069	6.85798	4.84431	0.00570829
1761	109	81	D	40	75	124	89	4.06	3.8	0	lalt	FALSE	0.660237	2	0.767429	TRUE	-8.79569	-9.08377	3.7119	FALSE	FALSE	11	0.034188	4.87036	4.84316	0.00592812
1762	109	82	I	80	75	124	89	5.4	4.23	0	lalt	FALSE	0.746446	2	0.583429	TRUE	-4.42932	-8.5139	3.38022	FALSE	FALSE	17	0.0169492	5.88264	4.84933	0.0038203
1763	109	83	T	20	3	121	112	5.47	3.52	0	lalt	FALSE	0.554502	2	0.606571	TRUE	0.817619	-0.00298365	7.81166	FALSE	FALSE	33	0.0168067	5.89482	4.85549	0.00500058
1764	109	84	O	40	157	193	131	4.33	5.23	0	lalt	FALSE	1.18657	2	0.410286	TRUE	3.32904	-5.02059	0.102718	FALSE	FALSE	19	0.00833333	6.90689	4.86789	0.00698665
1765	109	85	O	40	3	121	112	4.07	4.61	0	lalt	FALSE	0.955587	2	0.399143	FALSE	3.48134	-4.13028	-3.66885	FALSE	FALSE	21	0.00826446	6.91886	4.88018	0.00894014
1766	109	86	A	20	3	121	112	4.56	5.44	0	ralt	TRUE	0.769724	2	0.469143	TRUE	-0.435894	-5.71698	-1.39647	FALSE	FALSE	3	0.0245902	5.34577	4.88224	0.00610605
1767	109	87	O	40	0	168	107	5.05	4.38	1	ralt	FALSE	0.796724	2	0.538	TRUE	12.5164	0.0455649	-5.9167	FALSE	FALSE	20	0.0569106	4.13516	4.87547	0.00235805
1768	109	88	A	20	76	154	68	4.47	4.03	1	lalt	TRUE	0.966725	2	0.439143	TRUE	-8.872	-22.9828	23.6611	FALSE	FALSE	0	0.0403226	4.63227	4.87249	0.00168516
1769	109	89	A	20	0	168	107	4.19	4.62	0	lalt	FALSE	0.602919	2	0.629714	TRUE	-2.97078	2.213	-1.53324	FALSE	FALSE	2	0.016	5.96578	4.87873	0.00336951
1770	109	90	D	40	76	154	68	3.58	4.5	0	ralt	TRUE	0.62104	2	0.598571	TRUE	-2.44559	-15.5077	4.69888	FALSE	FALSE	6	0.015873	5.97728	4.88497	0.00473562
1771	109	91	D	40	0	168	107	3.55	3.53	0	ralt	TRUE	2.07611	2	0.461714	TRUE	3.92295	-12.8592	-6.71662	FALSE	FALSE	8	0.015748	5.98868	4.8912	0.00470004
1772	109	92	I	80	157	193	131	5.01	5.19	1	lalt	TRUE	0.700349	2	0.469429	TRUE	9.09135	12.2094	0.676512	FALSE	FALSE	13	0.046875	4.41504	4.88667	0.00312902
1773	109	93	A	20	75	124	89	5.16	3.75	0	lalt	FALSE	1.00233	2	0.390857	FALSE	5.54922	25.0639	-6.10206	FALSE	FALSE	5	0.0155039	6.01123	4.89296	0.0031063
1774	109	94	I	80	157	193	131	3.78	4.26	1	ralt	FALSE	0.616445	2	0.372571	FALSE	14.8054	2.37337	-1.55103	FALSE	FALSE	13	0.0538462	4.21501	4.88707	0.00296493
1775	109	95	R	80	3	121	112	4.08	3.98	0	ralt	TRUE	1.15258	2	0.350286	FALSE	8.78273	12.3113	-6.19908	FALSE	FALSE	27	0.0152672	6.03342	4.89343	0.00294376
1776	109	96	O	40	157	193	131	4.86	3.68	0	lalt	FALSE	0.974714	2	0.338	FALSE	3.67742	16.7635	-4.45539	FALSE	FALSE	19	0.0151515	6.04439	4.89978	0.00452985
1777	109	97	I	80	138	154	91	4	4.27	0	ralt	TRUE	0.873854	2	0.315714	FALSE	17.5083	10.0482	5.08715	FALSE	FALSE	16	0.0150376	6.05528	4.90612	0.00449728
1778	109	98	T	20	157	193	131	4.64	4.58	0	ralt	TRUE	1.15096	2	0.419143	TRUE	-15.506	-23.8182	13.1964	FALSE	FALSE	31	0.0149254	6.06609	4.91244	0.00446517
1779	109	99	R	80	138	154	91	4.36	4.89	1	ralt	FALSE	0.85005	2	0.554286	TRUE	-5.38114	5.18746	1.92315	FALSE	FALSE	28	0.0592593	4.07682	4.90569	0.00277497
1780	109	100	D	40	0	168	107	4.21	3.59	0	lalt	FALSE	0.997101	2	0.454	TRUE	1.70223	-4.18916	-2.11464	FALSE	FALSE	8	0.0220588	5.5025	4.9085	0.00206435
1781	109	101	R	80	138	154	91	3.58	4.12	1	lalt	TRUE	0.468318	2	0.45	TRUE	1.80029	-6.30084	4.01077	FALSE	FALSE	28	0.0656934	3.92811	4.90087	0.00198317
1782	109	102	A	20	76	154	68	4.05	5.06	1	ralt	FALSE	0.856522	2	0.533143	TRUE	5.17393	1.27842	3.97123	FALSE	FALSE	0	0.0434783	4.52356	4.89738	0.0012261
1783	109	103	O	40	76	154	68	4.38	4.68	0	lalt	FALSE	0.564604	2	0.124286	FALSE	1.84897	3.71028	3.59352	FALSE	FALSE	18	0.028777	5.11894	4.8978	0.00185849
1784	109	104	T	20	3	121	112	4.18	5.07	0	lalt	FALSE	0.914691	2	0.587714	TRUE	13.071	14.3253	-19.7443	FALSE	FALSE	33	0.0214286	5.54432	4.90088	0.00257972
1785	109	105	A	20	76	154	68	4.12	3.91	1	lalt	TRUE	0.897743	2	0.596	TRUE	8.55977	1.56968	13.1235	FALSE	FALSE	0	0.0496454	4.3322	4.89622	0.00208034
1786	109	106	I	80	157	193	131	5.41	4.28	1	ralt	FALSE	1.07689	2	0.684	TRUE	-1.88738	-0.394651	1.91123	FALSE	FALSE	13	0.056338	4.14975	4.89043	0.00115194
1787	109	107	R	80	138	154	91	5.22	4.56	1	lalt	TRUE	0.699948	2	0.732	TRUE	-0.905443	1.35957	2.14246	FALSE	FALSE	28	0.0699301	3.83794	4.88267	0.000946172
1788	109	108	I	80	157	193	131	3.75	4.83	1	ralt	FALSE	0.917972	2	0.405714	TRUE	4.37713	3.03487	-5.09793	FALSE	FALSE	13	0.0625	4	4.87609	0.000876521
1789	109	109	R	80	138	154	91	4.34	5.18	1	ralt	FALSE	0.749083	2	0.522	TRUE	-2.97289	1.44848	-14.5068	FALSE	FALSE	28	0.0758621	3.72048	4.86777	0.00082922
1790	109	110	A	20	157	193	131	5.39	4.11	0	lalt	FALSE	0.920137	2	0.330571	FALSE	3.11874	5.82745	8.01312	FALSE	FALSE	1	0.0136986	6.18982	4.87467	0.00242217
1791	109	111	A	20	76	154	68	5.46	4.81	1	ralt	FALSE	0.493192	2	0.323429	FALSE	1.67391	-0.00383742	1.56299	FALSE	FALSE	0	0.0544218	4.19967	4.86956	0.00256182
1792	109	112	T	20	75	124	89	3.86	4.3	1	lalt	TRUE	0.384131	2	0.379429	FALSE	0.485443	-10.9768	4.00623	FALSE	FALSE	35	0.0810811	3.62449	4.86084	0.000842944
1793	109	113	I	80	157	193	131	3.85	5.09	1	lalt	TRUE	1.17838	2	0.565714	TRUE	-3.31173	-10.4144	1.7603	FALSE	FALSE	13	0.0671141	3.89724	4.85398	0.000726292
1794	109	114	T	20	157	193	131	3.9	4.18	0	ralt	TRUE	0.884437	2	0.538286	TRUE	6.11912	-0.119091	5.06686	FALSE	FALSE	31	0.02	5.64386	4.85781	0.00177496
1795	109	115	R	80	138	154	91	5	4.45	1	ralt	FALSE	1.00459	2	0.924571	TRUE	1.22317	7.12392	-16.224	FALSE	FALSE	28	0.0794702	3.65344	4.84953	0.00168956
1796	109	116	A	20	75	124	89	4.64	3.81	0	ralt	TRUE	1.23165	2	0.382857	FALSE	8.36685	9.42702	3.41303	FALSE	FALSE	5	0.0197368	5.66297	4.85346	0.00167934
1797	109	117	R	80	157	193	131	5.02	4.8	0	lalt	FALSE	1.17671	2	0.586286	TRUE	4.88817	8.56817	-3.56204	FALSE	FALSE	25	0.00653595	7.25739	4.86548	0.00490818
1798	109	118	I	80	3	121	112	4.62	5.21	0	ralt	TRUE	0.782745	2	0.393714	FALSE	3.77372	-5.3859	-6.7626	FALSE	FALSE	15	0.012987	6.26679	4.87253	0.00548852
1799	109	119	O	40	3	121	112	4.23	4.48	0	lalt	FALSE	0.704775	2	0.225429	FALSE	9.56682	12.5831	-10.1118	FALSE	FALSE	21	0.0129032	6.27612	4.87956	0.00388288
1800	109	120	T	20	75	124	89	5.44	4.09	1	lalt	TRUE	0.611851	3	0.550857	TRUE	13.2792	-10.3159	6.51557	FALSE	FALSE	35	0.0833333	3.58496	4.871	0.00221512
1801	109	121	R	80	157	193	131	4.8	4.92	0	lalt	FALSE	0.688919	3	0.410286	TRUE	3.46837	7.63462	-4.55622	FALSE	FALSE	25	0.0127389	6.29462	4.87806	0.00220185
1802	109	122	D	40	138	154	91	5.26	4.35	0	ralt	TRUE	1.15393	3	0.482857	TRUE	-5.69147	-4.46182	-5.23567	FALSE	FALSE	10	0.0126582	6.30378	4.88509	0.00381185
1803	109	123	I	80	3	121	112	4.88	4.14	0	lalt	FALSE	1.6679	3	0.51	TRUE	-2.54947	-5.11429	-9.45547	FALSE	FALSE	15	0.0188679	5.72792	4.88903	0.00319664
1804	109	124	R	80	75	124	89	3.83	3.69	0	ralt	TRUE	0.851983	3	0.348857	FALSE	0.84042	7.15978	2.4961	FALSE	FALSE	29	0.01875	5.73697	4.89298	0.00258906
1805	109	125	O	40	3	121	112	4.23	3.63	0	lalt	FALSE	0.428227	3	0.470857	TRUE	5.84682	-5.08084	-5.50791	FALSE	FALSE	21	0.0186335	5.74595	4.89693	0.00257377
1806	109	126	O	40	138	154	91	3.52	5.5	0	ralt	TRUE	0.819396	3	0.493143	TRUE	7.02828	21.5263	-13.8268	FALSE	FALSE	22	0.00617284	7.33985	4.90852	0.00464363
1807	109	127	A	20	76	154	68	4.35	4.66	1	lalt	TRUE	0.821487	3	0.475143	TRUE	1.76198	6.20229	4.67091	FALSE	FALSE	0	0.0552147	4.1788	4.90363	0.0037616
1808	109	128	O	40	138	154	91	5.47	4.79	0	ralt	TRUE	0.618591	3	0.524857	TRUE	3.04568	4.42924	3.96427	FALSE	FALSE	22	0.0121951	6.35755	4.91057	0.00225393
1809	109	129	R	80	138	154	91	3.83	4.89	1	ralt	FALSE	0.701606	3	0.922571	TRUE	0.115591	3.36069	-1.40066	FALSE	FALSE	28	0.0787879	3.66588	4.90278	0.00210113
1810	109	130	I	80	76	154	68	4.72	5.06	0	ralt	TRUE	0.799709	3	0.510286	TRUE	6.03415	-0.0424468	-7.46214	FALSE	FALSE	12	0.0060241	7.37504	4.91427	0.00355692
1811	109	131	T	20	75	124	89	4.91	5.16	1	lalt	TRUE	0.318767	3	0.619429	TRUE	5.96144	-4.51551	1.45821	FALSE	FALSE	35	0.0838323	3.57635	4.90603	0.00351388
1812	109	132	R	80	138	154	91	4.27	4.52	1	lalt	TRUE	0.472795	3	1	TRUE	1.64719	2.71535	-4.50837	FALSE	FALSE	28	0.0833333	3.58496	4.89794	0.000493911
1813	109	133	O	40	0	168	107	5.01	4.69	1	lalt	TRUE	0.765909	3	0.690571	TRUE	7.91054	5.1001	4.86208	FALSE	FALSE	20	0.0473373	4.40088	4.89453	0.000705076
1814	109	134	T	20	0	168	107	4.98	4.81	0	ralt	TRUE	0.32498	3	0.506286	TRUE	-4.94233	4.81846	10.5672	FALSE	FALSE	32	0.0176471	5.82443	4.89872	0.00167882
1815	109	135	T	20	0	168	107	4.86	3.58	0	ralt	TRUE	0.630942	3	0.459714	TRUE	1.72011	13.3129	-2.34633	FALSE	FALSE	32	0.0233918	5.41785	4.9008	0.0045496
1816	109	136	A	20	138	154	91	3.53	3.68	0	ralt	TRUE	0.522174	3	0.620857	TRUE	-0.596429	-2.78788	-7.1693	FALSE	FALSE	4	0.0116279	6.42626	4.90783	0.00267243
1817	109	137	O	40	0	168	107	4.37	4.88	1	ralt	FALSE	0.523425	3	0.671429	TRUE	3.50577	6.68766	-2.27215	FALSE	FALSE	20	0.0520231	4.2647	4.90372	0.00214263
1818	109	138	T	20	157	193	131	5.48	5.01	0	ralt	TRUE	0.710493	3	0.504	TRUE	1.88145	-3.55499	11.454	FALSE	FALSE	31	0.0229885	5.44294	4.90587	0.00130095
1819	109	139	R	80	76	154	68	4.74	5.29	0	lalt	FALSE	1.01244	3	0.622857	TRUE	-4.84094	-18.1412	3.06844	FALSE	FALSE	24	0.0114286	6.45121	4.9129	0.00262851
1820	109	140	O	40	0	168	107	4.96	4.21	1	lalt	TRUE	0.365515	3	0.621714	TRUE	6.14334	4.01672	0.707937	FALSE	FALSE	20	0.0568182	4.1375	4.90815	0.0020656
1821	109	141	R	80	138	154	91	5.46	4.77	1	lalt	TRUE	0.715531	3	0.88	TRUE	3.5242	10.2524	-10.1154	FALSE	FALSE	28	0.0847458	3.56071	4.90033	0.000564981
1822	109	142	I	80	76	154	68	5.42	5.37	0	ralt	TRUE	0.85559	3	0.683143	TRUE	0.132003	0.209406	8.19126	FALSE	FALSE	12	0.011236	6.47573	4.90741	0.00191624
1823	109	143	I	80	157	193	131	4.52	5.37	1	lalt	TRUE	1.09951	3	0.836	TRUE	-1.16638	-5.03663	0.473786	FALSE	FALSE	13	0.0614525	4.02438	4.90218	0.00199844
1824	109	144	T	20	75	124	89	3.87	4.01	1	lalt	TRUE	0.430564	3	0.551714	TRUE	8.57861	6.1417	-3.33067	FALSE	FALSE	35	0.0833333	3.58496	4.89466	0.000523045
1825	109	145	I	80	157	193	131	3.6	4.56	1	lalt	TRUE	1.07764	3	0.864857	TRUE	1.31442	7.9137	2.11316	FALSE	FALSE	13	0.0662983	3.91488	4.88898	0.000492271
1826	109	146	O	40	157	193	131	4.98	3.99	0	ralt	TRUE	1.35484	3	0.348286	FALSE	-6.72589	-10.8916	5.61848	FALSE	FALSE	19	0.0164835	5.92283	4.89346	0.00142121
1827	109	147	D	40	76	154	68	4.45	5.13	0	lalt	FALSE	0.808927	3	0.553143	TRUE	-2.94893	-13.3414	2.6028	FALSE	FALSE	6	0.0163934	5.93074	4.89794	0.00227779
1828	109	148	O	40	0	168	107	4.32	4.1	1	ralt	FALSE	0.675982	3	0.334857	FALSE	5.68824	17.6198	-5.69304	FALSE	FALSE	20	0.0597826	4.06413	4.89311	0.00143471
1829	109	149	O	40	0	168	107	4.62	3.57	1	lalt	TRUE	0.766124	3	0.461429	TRUE	-5.54924	4.31542	-0.461629	FALSE	FALSE	20	0.0648649	3.94642	4.88772	0.0012478
1830	109	150	D	40	157	193	131	3.62	4.88	0	lalt	FALSE	0.844247	3	0.603714	TRUE	4.02446	7.83386	2.71321	FALSE	FALSE	7	0.016129	5.9542	4.89229	0.00139264
1831	109	151	I	80	3	121	112	3.75	5.38	0	ralt	TRUE	0.8524	3	0.604571	TRUE	-4.48539	-11.0945	3.62138	FALSE	FALSE	15	0.0213904	5.54689	4.8949	0.00196246
1832	109	152	T	20	75	124	89	4.59	3.83	1	lalt	TRUE	0.247523	3	0.447714	TRUE	1.2685	1.96009	0.818568	FALSE	FALSE	35	0.0851064	3.55459	4.88759	0.00103568
1833	109	153	O	40	0	168	107	4.19	3.66	1	ralt	FALSE	0.803777	3	0.261429	FALSE	-0.185833	-1.88899	4.14706	FALSE	FALSE	20	0.0687831	3.8618	4.88193	0.000436828
1834	109	154	A	20	76	154	68	5.12	5.45	1	ralt	FALSE	0.618845	3	0.492571	TRUE	0.0119982	-7.81226	3.1679	FALSE	FALSE	0	0.0526316	4.24793	4.87827	0.000569364
1835	109	155	A	20	76	154	68	4.98	3.54	1	lalt	TRUE	0.665825	3	0.361143	FALSE	3.76663	13.1917	-6.60865	FALSE	FALSE	0	0.0575916	4.118	4.87399	0.00133276
1836	109	156	I	80	157	193	131	5.15	4.84	1	lalt	TRUE	1.14604	3	0.396286	FALSE	4.89506	9.43742	-5.39291	FALSE	FALSE	13	0.0677083	3.88452	4.86861	0.000532327
1837	109	157	T	20	3	121	112	4.24	4.98	0	ralt	TRUE	0.441943	3	0.686857	TRUE	-7.01185	-4.06147	2.49876	FALSE	FALSE	33	0.0207254	5.59246	4.8715	0.0010623
1838	109	158	A	20	76	154	68	4.54	4.89	1	lalt	TRUE	0.407178	3	0.447429	TRUE	5.29407	-2.43766	-2.60869	FALSE	FALSE	0	0.0618557	4.01495	4.86682	0.00107977
1839	109	159	A	20	138	154	91	4.09	4.19	0	ralt	TRUE	0.564136	3	0.438857	TRUE	6.48598	5.18451	5.86228	FALSE	FALSE	4	0.0153846	6.02237	4.87163	0.00133235
1840	109	160	R	80	138	154	91	4.52	4.06	1	lalt	TRUE	0.485254	3	0.441429	TRUE	4.54	5.79079	-4.87315	FALSE	FALSE	28	0.0816327	3.61471	4.86504	0.00125321
1841	109	161	I	80	157	193	131	5.45	4.42	1	ralt	FALSE	0.902419	3	0.757429	TRUE	2.81792	-0.358961	-7.55047	FALSE	FALSE	13	0.071066	3.8147	4.8595	0.000403241
1842	109	162	T	20	138	154	91	4.55	5.37	0	ralt	TRUE	0.725451	3	0.736	TRUE	-7.20398	-12.1576	7.18772	FALSE	FALSE	34	0.020202	5.62936	4.86255	0.00101853
1843	109	163	D	40	3	121	112	4.66	3.66	1	ralt	FALSE	0.894473	3	0.770286	TRUE	6.23321	4.43494	-0.26672	FALSE	FALSE	9	0.0502513	4.3147	4.85948	0.00111133
1844	109	164	R	80	75	124	89	4.66	4.14	0	lalt	FALSE	0.641626	3	0.456571	TRUE	1.59357	-5.02901	-1.6181	FALSE	FALSE	29	0.02	5.64386	4.86257	0.00110616
1845	109	165	T	20	75	124	89	3.78	3.99	1	lalt	TRUE	0.242777	3	0.734	TRUE	-5.49611	-6.33695	13.1184	FALSE	FALSE	35	0.0845771	3.56359	4.85595	0.000961338
1846	109	166	A	20	76	154	68	4.71	4.63	1	lalt	TRUE	0.31292	3	0.261714	FALSE	5.15549	5.32754	6.02493	FALSE	FALSE	0	0.0643564	3.95777	4.85128	0.000401152
1847	109	167	A	20	0	168	107	4.83	3.89	0	lalt	FALSE	0.426104	3	0.431143	TRUE	1.54821	0.885196	-14.6181	FALSE	FALSE	2	0.0147783	6.08037	4.85625	0.00126145
1848	109	168	A	20	3	121	112	4.03	5.47	0	ralt	TRUE	0.574227	3	0.399714	FALSE	-1.6629	1.96381	3.92582	FALSE	FALSE	3	0.0196078	5.67243	4.85944	0.00180602
1849	109	169	O	40	0	168	107	5.27	4.62	1	lalt	TRUE	0.789284	3	0.599429	TRUE	5.14166	12.8453	-9.22748	FALSE	FALSE	20	0.0682927	3.87213	4.85442	0.000986347
1850	109	170	R	80	157	193	131	4.7	3.99	0	lalt	FALSE	0.780294	3	0.362857	FALSE	4.82809	2.09352	-5.69189	FALSE	FALSE	25	0.0145631	6.10154	4.85941	0.00122592
1851	109	171	O	40	3	121	112	3.64	4.2	0	ralt	TRUE	1.13239	3	0.643714	TRUE	-8.40901	-27.8239	10.3571	FALSE	FALSE	21	0.0193237	5.69349	4.86263	0.00178096
1852	109	172	A	20	75	124	89	4.96	4.65	0	ralt	TRUE	0.523587	3	0.569143	TRUE	-10.9138	-32.3966	24.4874	FALSE	FALSE	5	0.0192308	5.70044	4.86586	0.00153108
1853	109	173	I	80	138	154	91	5.29	5.22	0	lalt	FALSE	0.889617	3	0.733429	TRUE	-4.98463	-20.3683	9.70851	FALSE	FALSE	16	0.0143541	6.1224	4.87082	0.00176463
1854	109	174	O	40	0	168	107	5.14	4.15	1	lalt	TRUE	0.919501	3	0.664286	TRUE	0.014932	-5.01681	6.96661	FALSE	FALSE	20	0.0714286	3.80735	4.86558	0.00118838
1855	109	175	D	40	3	121	112	5.4	4.45	1	ralt	FALSE	0.640591	3	0.588571	TRUE	2.09055	6.87309	2.52128	FALSE	FALSE	9	0.0521327	4.26167	4.86244	0.00045771
1856	109	176	O	40	0	168	107	3.62	4.23	1	lalt	TRUE	0.767702	3	0.880286	TRUE	1.08516	6.11213	-20.3276	FALSE	FALSE	20	0.0754717	3.72792	4.85693	0.000442333
1857	109	177	I	80	0	168	107	4.43	5.04	0	ralt	TRUE	0.489904	3	0.672286	TRUE	-2.03353	1.50036	-7.41467	FALSE	FALSE	14	0.0140845	6.14975	4.86197	0.00115916
1858	109	178	I	80	75	124	89	4.01	3.75	0	ralt	TRUE	0.626971	3	0.326286	FALSE	11.645	8.16598	-3.22263	FALSE	FALSE	17	0.0140187	6.1565	4.86699	0.00196003
1859	109	179	O	40	0	168	107	5.2	4.44	1	ralt	FALSE	0.794065	3	0.545143	TRUE	-4.12634	-5.80442	-16.0915	FALSE	FALSE	20	0.0790698	3.66073	4.86123	0.00113721
1860	109	180	D	40	3	121	112	5.29	3.71	1	ralt	FALSE	0.640578	4	0.574857	TRUE	-0.581481	-16.0889	18.14	FALSE	FALSE	9	0.0555556	4.16993	4.85779	0.000399786
1861	109	181	D	40	0	168	107	5.31	4.96	0	ralt	TRUE	0.46165	4	0.513429	TRUE	-3.02535	-15.7251	6.62213	FALSE	FALSE	8	0.0184332	5.76155	4.86118	0.000973105
1862	109	182	A	20	0	168	107	3.78	5.29	0	lalt	FALSE	0.374655	4	0.658	TRUE	0.184756	-3.9056	-10.3727	FALSE	FALSE	2	0.0183486	5.76818	4.86458	0.00146409
1863	109	183	A	20	76	154	68	5.36	4.75	1	lalt	TRUE	1.13871	4	0.293714	FALSE	6.72801	-3.83561	6.09553	FALSE	FALSE	0	0.0639269	3.96743	4.86029	0.000927682
1864	109	184	O	40	75	124	89	5.07	3.73	0	ralt	TRUE	0.995735	4	0.324	FALSE	4.81349	1.95638	-2.95835	FALSE	FALSE	23	0.0136364	6.1964	4.86536	0.00115231
1865	109	185	D	40	3	121	112	5.04	4.49	1	ralt	FALSE	0.709852	4	0.612857	TRUE	1.42245	2.65813	1.36103	FALSE	FALSE	9	0.0588235	4.08746	4.86163	0.0011644
1866	109	186	I	80	75	124	89	5.45	4.11	0	ralt	TRUE	0.686881	4	0.637143	TRUE	-1.89984	-4.29999	-5.89737	FALSE	FALSE	17	0.018018	5.79442	4.86508	0.000932943
1867	109	187	D	40	3	121	112	4.2	4.75	1	ralt	FALSE	0.943898	4	0.202286	FALSE	4.66836	0.494666	9.38448	FALSE	FALSE	9	0.0627803	3.99354	4.86098	0.000912175
1868	109	188	R	80	138	154	91	5.43	5.44	1	lalt	TRUE	0.76701	4	0.126571	FALSE	-7.27283	-6.06522	10.2823	FALSE	FALSE	28	0.0758929	3.71989	4.85574	0.000351393
1869	109	189	A	20	157	193	131	4.9	5.23	0	ralt	TRUE	1.13193	4	0.597429	TRUE	-1.38384	2.46177	-9.49473	FALSE	FALSE	1	0.0133333	6.22882	4.86086	0.00108954
1870	109	190	D	40	3	121	112	3.73	4.92	1	ralt	FALSE	0.655943	4	0.363429	FALSE	4.68245	-3.22115	-0.578617	FALSE	FALSE	9	0.0663717	3.91329	4.8565	0.00110892
1871	109	191	I	80	0	168	107	3.54	5.35	0	ralt	TRUE	0.63406	4	0.526571	TRUE	5.81808	1.77428	5.92661	FALSE	FALSE	14	0.0176211	5.82655	4.86003	0.000882768
1872	109	192	I	80	157	193	131	5.05	4.14	1	ralt	FALSE	1.04014	4	0.451429	TRUE	6.92182	6.10518	0.107125	FALSE	FALSE	13	0.0657895	3.926	4.85576	0.000879157
1873	109	193	R	80	3	121	112	5.03	4.57	0	lalt	FALSE	1.1292	4	0.128	FALSE	1.6372	-4.50465	-6.18167	FALSE	FALSE	27	0.0131004	6.25424	4.86091	0.00109518
1874	109	194	I	80	157	193	131	5.09	3.63	1	lalt	TRUE	0.458249	4	0.678286	TRUE	-3.02757	-6.78108	-3.94861	FALSE	FALSE	13	0.0695652	3.84549	4.85634	0.0010782
1875	109	195	A	20	76	154	68	3.58	4.94	1	lalt	TRUE	0.686364	4	0.396	FALSE	-0.24935	3.73443	4.49044	FALSE	FALSE	0	0.0649351	3.94486	4.85222	0.000339309
1876	109	196	D	40	3	121	112	4.01	4.4	1	lalt	TRUE	0.380506	4	0.819429	TRUE	-1.96814	-1.08998	-4.24777	FALSE	FALSE	9	0.0689655	3.85798	4.84778	0.000338085
1877	109	197	O	40	0	168	107	3.57	4.59	1	ralt	FALSE	1.03065	4	0.611143	TRUE	-2.45125	6.00963	8.3038	FALSE	FALSE	20	0.0772532	3.69426	4.84269	0.000303951
1878	109	198	T	20	75	124	89	3.76	5.3	1	lalt	TRUE	0.581787	4	0.313714	FALSE	-8.96705	-5.96546	11.5691	FALSE	FALSE	35	0.0769231	3.70044	4.83768	0.00028237
1879	109	199	T	20	76	154	68	5.15	3.56	0	ralt	TRUE	0.349905	4	0.223714	FALSE	4.33365	11.6764	-4.13103	FALSE	FALSE	30	0.012766	6.29155	4.84293	0.00103607
1880	109	200	I	80	157	193	131	4.34	3.94	1	ralt	FALSE	1.13701	4	0.812857	TRUE	-4.1156	-1.09165	-4.82309	FALSE	FALSE	13	0.0720339	3.79518	4.83834	0.0010415
1881	109	201	D	40	138	154	91	3.77	4.26	0	ralt	TRUE	0.715165	4	0.600286	TRUE	-1.78761	-6.57814	9.06886	FALSE	FALSE	10	0.0126582	6.30378	4.8436	0.00103734
1882	109	202	R	80	0	168	107	3.92	4.84	0	lalt	FALSE	0.636387	4	0.557143	TRUE	-1.81506	-1.98329	2.092	FALSE	FALSE	26	0.012605	6.30986	4.84884	0.00176891
1883	109	203	R	80	157	193	131	5.04	4.47	0	lalt	FALSE	0.58746	4	0.557429	TRUE	2.16399	-1.36212	-5.01812	FALSE	FALSE	25	0.0167364	5.90087	4.85254	0.00155129
1884	109	204	R	80	76	154	68	5.16	3.53	0	lalt	FALSE	0.962495	4	0.691714	TRUE	-1.19019	-3.59597	4.72866	FALSE	FALSE	24	0.0125	6.32193	4.85775	0.00154507
1885	109	205	A	20	76	154	68	4.44	5.11	1	lalt	TRUE	0.639592	4	0.655143	TRUE	3.41863	9.45595	-8.0969	FALSE	FALSE	0	0.06639	3.91289	4.85367	0.00103157
1886	109	206	A	20	76	154	68	4.5	5.5	1	lalt	TRUE	0.409692	4	0.615143	TRUE	-3.43858	-10.7223	0.780709	FALSE	FALSE	0	0.0702479	3.8314	4.84931	0.00066387
1887	109	207	T	20	75	124	89	3.62	4.01	1	lalt	TRUE	0.572777	4	0.495429	TRUE	-5.30242	-5.65251	4.89242	FALSE	FALSE	35	0.0781893	3.67688	4.84436	0.000274795
1888	109	208	R	80	138	154	91	4.89	4.62	1	lalt	TRUE	0.766915	4	0.627143	TRUE	-0.969931	-2.54339	1.26977	FALSE	FALSE	28	0.0737705	3.76081	4.83979	0.000264603
1889	109	209	I	80	157	193	131	3.79	4.98	1	lalt	TRUE	0.713975	4	0.326286	FALSE	-1.47464	-0.406898	2.96635	FALSE	FALSE	13	0.0734694	3.76671	4.83528	0.000272001
1890	109	210	T	20	76	154	68	3.68	4.4	0	ralt	TRUE	0.578023	4	0.326286	FALSE	3.12662	12.3424	-3.50009	FALSE	FALSE	30	0.0162602	5.94251	4.8391	0.000787664
1891	109	211	O	40	0	168	107	3.94	5.13	1	lalt	TRUE	0.547274	4	0.630571	TRUE	2.3944	-6.61039	-3.3969	FALSE	FALSE	20	0.0769231	3.70044	4.83437	0.00077647
1892	109	212	I	80	76	154	68	3.58	4.26	0	ralt	TRUE	0.393392	4	0.699429	TRUE	0.104006	-0.833427	-2.15934	FALSE	FALSE	12	0.0120968	6.36923	4.83967	0.00097639
1893	109	213	D	40	3	121	112	3.67	3.92	1	lalt	TRUE	0.787577	4	0.746286	TRUE	-9.32176	-4.67783	3.95115	FALSE	FALSE	9	0.0682731	3.87254	4.83565	0.000989901
1894	109	214	A	20	157	193	131	4.78	4.81	0	ralt	TRUE	1.45871	4	0.524286	TRUE	9.61379	4.10972	7.43849	FALSE	FALSE	1	0.016	5.96578	4.8395	0.000784909
1895	109	215	I	80	157	193	131	4.47	4.28	1	lalt	TRUE	0.473791	4	0.537143	TRUE	3.87896	0.279664	-4.0286	FALSE	FALSE	13	0.0756972	3.72362	4.83493	0.000764885
1896	109	216	O	40	138	154	91	4.2	4.97	0	ralt	TRUE	0.595903	4	0.382571	FALSE	-5.65679	-4.88337	2.05452	FALSE	FALSE	22	0.0119048	6.39232	4.84024	0.000961685
1897	109	217	D	40	3	121	112	4.41	4.57	1	lalt	TRUE	0.523003	4	0.791143	TRUE	-0.264841	6.01746	0.600858	FALSE	FALSE	9	0.0711462	3.81307	4.83605	0.000966094
1898	109	218	O	40	157	193	131	4.9	4.5	0	ralt	TRUE	1.27303	4	0.738857	TRUE	2.60177	-0.182341	-9.07126	FALSE	FALSE	19	0.015748	5.98868	4.83993	0.000764405
1899	109	219	D	40	76	154	68	4.23	3.63	0	ralt	TRUE	0.609127	4	0.246571	FALSE	0.69743	3.21025	14.4647	FALSE	FALSE	6	0.0156863	5.99435	4.8438	0.00126
1900	109	220	R	80	76	154	68	4.84	4.97	0	ralt	TRUE	0.617302	4	0.255429	FALSE	1.44561	-1.67095	6.31954	FALSE	FALSE	24	0.015625	6	4.84766	0.00125527
1901	109	221	D	40	3	121	112	4.65	4.51	1	lalt	TRUE	0.357273	4	0.212857	FALSE	-3.04909	-0.201215	8.24846	FALSE	FALSE	9	0.07393	3.7577	4.8433	0.00074814
1902	109	222	O	40	138	154	91	4.4	4.68	0	ralt	TRUE	0.925364	4	0.324857	FALSE	4.23215	5.33705	-7.58512	FALSE	FALSE	22	0.0155039	6.01123	4.84717	0.00074542
1903	109	223	A	20	76	154	68	3.51	4.19	1	lalt	TRUE	0.207553	4	0.798571	TRUE	2.6008	7.06631	-2.9494	FALSE	FALSE	0	0.0694981	3.84688	4.84318	0.000750551
1904	109	224	I	80	157	193	131	4.01	4.12	1	lalt	TRUE	0.742753	4	0.425143	TRUE	-7.46053	3.74868	4.62727	FALSE	FALSE	13	0.0769231	3.70044	4.83868	0.000244144
1905	109	225	R	80	3	121	112	5.31	4.35	0	ralt	TRUE	1.12687	4	0.384571	FALSE	-3.28884	-2.52761	0.674225	FALSE	FALSE	27	0.0153257	6.02791	4.84259	0.00073037
1906	109	226	T	20	75	124	89	4.55	4.58	1	lalt	TRUE	0.189959	4	0.347429	FALSE	7.93746	4.46356	-0.67983	FALSE	FALSE	35	0.0763359	3.71149	4.83817	0.000727754
1907	109	227	R	80	0	168	107	3.91	4.14	0	ralt	TRUE	1.45598	4	0.952286	TRUE	0.543755	0.110785	-0.175963	FALSE	FALSE	26	0.0152091	6.03892	4.84209	0.000725156
1908	109	228	A	20	76	154	68	5.11	3.65	1	lalt	TRUE	0.315237	4	1	TRUE	2.20709	6.65126	-5.77041	FALSE	FALSE	0	0.0719697	3.79647	4.83802	0.000729504
1909	109	229	D	40	157	193	131	4.06	5.05	0	ralt	TRUE	0.610308	4	0.263714	FALSE	0.282594	-14.2561	5.23178	FALSE	FALSE	7	0.0150943	6.04985	4.84196	0.000726917
1910	109	230	R	80	138	154	91	3.53	5.19	1	ralt	FALSE	0.563411	4	0.781429	TRUE	-6.05344	-4.46865	2.31562	FALSE	FALSE	28	0.0714286	3.80735	4.83795	0.000724348
1911	109	231	O	40	75	124	89	3.63	5.17	0	ralt	TRUE	0.798491	4	0.567714	TRUE	2.91215	14.7606	-0.187864	FALSE	FALSE	23	0.0149813	6.0607	4.8419	0.000721798
1912	109	232	D	40	3	121	112	4.71	4.9	1	lalt	TRUE	0.824609	4	0.433143	TRUE	2.16364	0.40536	-9.87943	FALSE	FALSE	9	0.0746269	3.74416	4.8377	0.00071244
1913	109	233	D	40	138	154	91	4.69	4.32	0	ralt	TRUE	1.14562	4	0.372857	FALSE	-4.60544	-4.83924	5.65705	FALSE	FALSE	10	0.0148699	6.07146	4.84166	0.00070995
1914	109	234	O	40	0	168	107	5.46	3.8	1	ralt	FALSE	0.517658	4	0.657429	TRUE	-3.39289	3.92172	-4.25059	FALSE	FALSE	20	0.0740741	3.75489	4.83753	0.000707478
1915	109	235	I	80	76	154	68	4.45	4.09	0	ralt	TRUE	0.580822	4	0.640571	TRUE	8.92784	3.63232	-11.5759	FALSE	FALSE	12	0.0147601	6.08215	4.8415	0.000705022
1916	109	236	A	20	76	154	68	4.44	4.72	1	lalt	TRUE	0.25792	4	0.304286	FALSE	-7.44027	-11.2207	13.2476	FALSE	FALSE	0	0.0735294	3.76553	4.83744	0.000702583
1917	109	237	R	80	138	154	91	3.77	4.73	1	ralt	FALSE	0.697059	4	0.318286	FALSE	16.0673	18.5447	-2.11405	FALSE	FALSE	28	0.0732601	3.77083	4.83343	0.000220363
1918	109	238	A	20	138	154	91	4.63	4.67	0	ralt	TRUE	0.802173	4	0.764286	TRUE	-0.135269	-1.21494	-4.08904	FALSE	FALSE	4	0.0145985	6.09803	4.83743	0.000697756
1919	109	239	I	80	138	154	91	3.79	4.9	0	lalt	FALSE	0.614278	4	0.571714	TRUE	2.41301	-6.41128	-4.00015	FALSE	FALSE	16	0.0145455	6.10329	4.84142	0.00117169
1920	110	0	D	80	138	154	91	5.18	4.07	1	ralt	TRUE	0.960061	1	0	FALSE	-11.1645	-3.91698	19.2015	FALSE	FALSE	10	0.0277778	5.16993	5.1554	0.0145257
1921	110	1	O	40	157	193	131	4.02	3.93	0	lalt	TRUE	1.02608	1	0.0934286	FALSE	4.07842	-25.341	7.73454	FALSE	FALSE	19	0.027027	5.20945	5.14266	0.0272606
1922	110	2	T	80	75	124	89	4.63	4.35	0	ralt	FALSE	1.15421	1	0	FALSE	3.62827	-21.7617	20.9657	FALSE	FALSE	35	0.0263158	5.24793	5.13156	0.0266152
1923	110	3	O	40	0	168	107	3.53	4.14	1	lalt	FALSE	1.39525	1	0	FALSE	3.12509	7.45971	9.5308	FALSE	FALSE	20	0.025641	5.2854	5.12193	0.0259994
1924	110	4	I	20	75	124	89	4.16	4.64	0	ralt	FALSE	0.915431	1	0	FALSE	5.57099	0.468912	13.0284	FALSE	FALSE	17	0.025	5.32193	5.11365	0.0254112
1925	110	5	R	40	3	121	112	3.66	4.17	0	ralt	FALSE	0.854531	1	0	FALSE	13.0133	-12.164	3.79965	FALSE	FALSE	27	0.0243902	5.35755	5.1066	0.0248488
1926	110	6	O	40	0	168	107	3.98	4.49	1	ralt	TRUE	2.19761	1	0.191143	FALSE	1.2894	-17.5355	4.69225	FALSE	FALSE	20	0.047619	4.39232	5.08313	0.0186102
1927	110	7	D	80	138	154	91	4.9	3.84	1	lalt	FALSE	2.43762	1	0	FALSE	11.4423	19.6221	5.51596	FALSE	FALSE	10	0.0465116	4.42626	5.06148	0.0126534
1928	110	8	R	40	157	193	131	4.09	4.73	1	missing	FALSE		1	0.181143	FALSE	8.19941	-6.38326	-7.14863	TRUE	TRUE	25	0.0227273	5.45943	5.0583	0.0178536
1929	110	9	I	20	76	154	68	3.83	5.17	1	lalt	FALSE	0.885685	1	0	FALSE	10.8157	-2.36716	14.1313	FALSE	FALSE	12	0.0222222	5.49185	5.05596	0.0228262
1930	110	10	I	20	3	121	112	3.66	4.35	0	ralt	FALSE	0.887762	1	0.129714	FALSE	0.482913	-13.1655	5.39413	FALSE	FALSE	15	0.0217391	5.52356	5.05438	0.0223706
1931	110	11	A	20	138	154	91	4.04	4.92	0	lalt	TRUE	1.2589	1	0	FALSE	11.0593	7.62006	11.1434	FALSE	FALSE	4	0.0212766	5.55459	5.05351	0.0219328
1932	110	12	O	40	157	193	131	4.18	4.48	0	lalt	TRUE	1.33596	1	0	FALSE	8.68999	-2.30197	8.28439	FALSE	FALSE	19	0.0416667	4.58496	5.03788	0.0165094
1933	110	13	A	20	3	121	112	3.96	3.7	0	ralt	FALSE	1.20604	1	0.146571	FALSE	6.55458	-39.3151	0.792988	FALSE	FALSE	3	0.0204082	5.61471	5.03856	0.0162041
1934	110	14	D	80	157	193	131	4.01	5.18	0	ralt	FALSE	0.955209	1	0.215714	FALSE	16.6314	-9.59434	-10.8737	FALSE	FALSE	7	0.02	5.64386	5.03978	0.0207159
1935	110	15	T	80	3	121	112	4.75	3.7	1	ralt	TRUE	0.832291	1	0.105143	FALSE	9.67015	-4.46107	4.79385	FALSE	FALSE	33	0.0196078	5.67243	5.0415	0.0203395
1936	110	16	A	20	75	124	89	5.18	5.15	1	lalt	FALSE	1.06638	1	0.127429	FALSE	10.0286	4.61164	10.6493	FALSE	FALSE	5	0.0192308	5.70044	5.04368	0.0199766
1937	110	17	I	20	76	154	68	4.73	5.19	1	ralt	TRUE	0.962353	1	0.396286	FALSE	21.1017	9.53511	-10.1169	FALSE	FALSE	12	0.0377358	4.72792	5.0323	0.0150872
1938	110	18	A	20	3	121	112	4.18	3.56	0	lalt	TRUE	1.31732	1	0	FALSE	5.04756	-13.0025	10.4219	FALSE	FALSE	3	0.037037	4.75489	5.02182	0.0103748
1939	110	19	I	20	75	124	89	5.12	4.96	0	lalt	TRUE	0.297529	1	0	FALSE	18.413	15.1398	-7.97275	FALSE	FALSE	17	0.0363636	4.78136	5.01219	0.0102071
1940	110	20	O	40	0	168	107	5.27	3.8	1	ralt	TRUE	0.885529	1	0	FALSE	-18.6979	-14.7992	4.94888	FALSE	FALSE	20	0.0535714	4.22239	4.99474	0.00838264
1941	110	21	T	80	3	121	112	3.51	5.21	1	ralt	TRUE	1.28856	1	0	FALSE	4.41679	5.06518	13.2371	FALSE	FALSE	33	0.0350877	4.83289	4.98679	0.00825388
1942	110	22	T	80	138	154	91	4.26	4.11	0	lalt	TRUE	0.243715	1	0	FALSE	8.81311	-18.6383	-1.20688	FALSE	FALSE	34	0.0172414	5.85798	4.99232	0.0138891
1943	110	23	A	20	75	124	89	4.1	4.78	1	ralt	TRUE	0.873853	1	0	FALSE	9.55971	-20.0545	12.8816	FALSE	FALSE	5	0.0338983	4.88264	4.98549	0.0136719
1944	110	24	R	40	157	193	131	5.33	4.22	1	ralt	TRUE	0.689961	1	0	FALSE	9.94208	13.0018	-4.26691	FALSE	FALSE	25	0.0333333	4.90689	4.97928	0.00944301
1945	110	25	D	80	138	154	91	4.64	3.89	1	lalt	FALSE	1.44395	1	0.182286	FALSE	10.1841	14.1807	0.647368	FALSE	FALSE	10	0.0491803	4.34577	4.96574	0.00777554
1946	110	26	I	20	75	124	89	4.71	3.84	0	lalt	TRUE	1.34306	1	0	FALSE	9.68744	23.2063	5.72033	FALSE	FALSE	17	0.0483871	4.36923	4.953	0.00616059
1947	110	27	I	20	76	154	68	3.59	3.67	1	ralt	TRUE	0.425193	1	0	FALSE	8.49584	19.2672	-9.17439	FALSE	FALSE	12	0.047619	4.39232	4.94102	0.006076
1948	110	28	R	40	157	193	131	3.72	3.61	1	ralt	TRUE	1.08142	1	0	FALSE	24.5958	14.431	-6.16267	FALSE	FALSE	25	0.046875	4.41504	4.92976	0.00599365
1949	110	29	I	20	76	154	68	4.54	4.7	1	ralt	TRUE	0.354672	1	0	FALSE	5.56897	-28.6642	15.912	FALSE	FALSE	12	0.0615385	4.02237	4.91365	0.00514816
1950	110	30	T	80	3	121	112	4.69	3.68	1	ralt	TRUE	0.329782	1	0	FALSE	-16.4555	-1.65772	4.28921	FALSE	FALSE	33	0.0454545	4.45943	4.90379	0.00508147
1951	110	31	T	80	3	121	112	3.65	5.08	1	ralt	TRUE	0.279941	1	0	FALSE	9.19345	10.8382	-37.2689	FALSE	FALSE	33	0.0597015	4.06609	4.88917	0.0111199
1952	110	32	T	80	3	121	112	4.61	3.77	1	ralt	TRUE	0.359085	1	0	FALSE	-8.19796	0.304486	26.7285	FALSE	FALSE	33	0.0735294	3.76553	4.87107	0.00843104
1953	110	33	A	20	0	168	107	4.87	4.29	0	lalt	TRUE	0.988203	1	0.134571	FALSE	14.5872	17.9642	1.47851	FALSE	FALSE	2	0.0144928	6.10852	4.88094	0.00929706
1954	110	34	I	20	3	121	112	4.97	4.69	0	lalt	TRUE	0.500229	1	0	FALSE	-14.6502	-21.9891	17.532	FALSE	FALSE	15	0.0285714	5.12928	4.88018	0.0116631
1955	110	35	R	40	157	193	131	3.81	4.59	1	ralt	TRUE	2.04923	1	0.092	FALSE	2.97018	1.3174	-4.41796	FALSE	FALSE	25	0.056338	4.14975	4.86786	0.00608757
1956	110	36	I	20	76	154	68	5.05	4.15	1	ralt	TRUE	0.385394	1	0	FALSE	12.1573	-0.553189	-4.59419	FALSE	FALSE	12	0.0694444	3.848	4.85217	0.0035917
1957	110	37	R	40	157	193	131	3.68	5.3	1	ralt	TRUE	0.2605	1	0	FALSE	6.89799	-2.00707	1.48022	FALSE	FALSE	25	0.0684932	3.8679	4.83717	0.00312586
1958	110	38	O	40	76	154	68	4.85	3.53	0	ralt	FALSE	0.726595	1	0.122	FALSE	8.47032	-6.49552	-1.24119	FALSE	FALSE	18	0.0135135	6.20945	4.84817	0.00871529
1959	110	39	D	80	138	154	91	5.37	4.13	1	lalt	FALSE	1.68866	1	0.189429	FALSE	-5.28041	-28.9806	18.5031	FALSE	FALSE	10	0.0533333	4.22882	4.83795	0.00902112
1960	110	40	A	20	0	168	107	3.69	4.76	0	lalt	TRUE	1.17269	1	0.139429	FALSE	21.537	9.37938	-21.8635	FALSE	FALSE	2	0.0263158	5.24793	4.83934	0.00572732
1961	110	41	R	40	138	154	91	4.12	3.87	0	lalt	TRUE	1.97372	1	0	FALSE	21.8879	20.8236	-4.03377	FALSE	FALSE	28	0.012987	6.26679	4.85062	0.0106649
1962	110	42	I	20	76	154	68	3.85	3.67	1	ralt	TRUE	0.501917	1	0	FALSE	9.62934	28.5783	11.215	FALSE	FALSE	12	0.0769231	3.70044	4.83473	0.00802791
1963	110	43	D	80	76	154	68	4.87	5.06	0	ralt	FALSE	1.20709	1	0	FALSE	7.91717	0.0962478	23.2259	FALSE	FALSE	6	0.0126582	6.30378	4.84624	0.00793346
1964	110	44	R	40	0	168	107	4.77	5.31	0	lalt	TRUE	1.58404	1	0	FALSE	11.7439	15.5154	-35.9618	FALSE	FALSE	26	0.0125	6.32193	4.85769	0.0133135
1965	110	45	R	40	75	124	89	5.12	3.64	0	ralt	FALSE	1.60698	1	0.237429	FALSE	3.86549	-19.662	12.8638	FALSE	FALSE	29	0.0123457	6.33985	4.86908	0.0131566
1966	110	46	T	80	157	193	131	4.55	4.26	0	lalt	TRUE	0.651073	1	0	FALSE	7.56177	1.35087	8.67156	FALSE	FALSE	31	0.0121951	6.35755	4.8804	0.0130033
1967	110	47	O	40	138	154	91	4.4	3.92	0	ralt	FALSE	1.11016	1	0.160571	FALSE	-7.68955	-32.1	13.2255	FALSE	FALSE	22	0.0120482	6.37504	4.89166	0.0128536
1968	110	48	O	40	76	154	68	5.16	4.49	0	ralt	FALSE	1.29827	1	0.178286	FALSE	12.0316	9.50307	5.7019	FALSE	FALSE	18	0.0238095	5.39232	4.89398	0.00982364
1969	110	49	A	20	0	168	107	5.13	4.7	0	ralt	FALSE	0.984268	1	0.142	FALSE	10.3849	23.3587	-14.4576	FALSE	FALSE	2	0.0352941	4.82443	4.89074	0.00576241
1970	110	50	A	20	157	193	131	5.08	5.33	0	ralt	FALSE	1.7212	1	0.127143	FALSE	-9.09899	-12.3669	17.2046	FALSE	FALSE	1	0.0116279	6.42626	4.90208	0.00851813
1971	110	51	I	20	138	154	91	5.11	4.5	0	lalt	TRUE	1.37614	1	0	FALSE	18.1195	18.1479	0.78517	FALSE	FALSE	16	0.0114943	6.44294	4.91335	0.0122877
1972	110	52	T	80	0	168	107	5.35	4.92	0	lalt	TRUE	0.510213	1	0.186857	FALSE	-2.00741	-31.5591	19.2996	FALSE	FALSE	32	0.0113636	6.45943	4.92455	0.0121539
1973	110	53	D	80	0	168	107	4.57	3.97	0	lalt	TRUE	0.833224	1	0	FALSE	-7.81419	24.599	-8.92223	FALSE	FALSE	8	0.011236	6.47573	4.93569	0.012023
1974	110	54	T	80	3	121	112	5.06	5.27	1	ralt	TRUE	0.434341	1	0	FALSE	7.19643	-13.8973	-22.2834	FALSE	FALSE	33	0.0666667	3.90689	4.92321	0.00702392
1975	110	55	O	40	3	121	112	3.81	4.34	0	lalt	TRUE	0.814328	1	0	FALSE	18.1003	22.7168	-11.8746	FALSE	FALSE	21	0.010989	6.50779	4.93447	0.00695143
1976	110	56	A	20	75	124	89	5	5.5	1	ralt	TRUE	0.666474	1	0.214286	FALSE	17.434	0.907292	3.48142	FALSE	FALSE	5	0.0326087	4.9386	4.93226	0.00799228
1977	110	57	T	80	3	121	112	5.43	3.71	1	ralt	TRUE	0.266436	1	0	FALSE	7.72656	0.951677	4.4203	FALSE	FALSE	33	0.0752688	3.7318	4.91852	0.0030296
1978	110	58	I	20	0	168	107	5.08	4.31	0	ralt	FALSE	0.97161	1	0.145714	FALSE	-5.18681	2.45999	-8.93749	FALSE	FALSE	14	0.0106383	6.55459	4.92996	0.00657858
1979	110	59	O	40	0	168	107	5.29	4.28	1	lalt	FALSE	1.31057	1	0	FALSE	23.7997	-3.32382	-3.94669	FALSE	FALSE	20	0.0421053	4.56986	4.92454	0.00722677
1980	110	60	T	80	75	124	89	5.08	4.62	0	lalt	TRUE	0.655695	2	0	FALSE	1.25285	6.30778	17.5119	FALSE	FALSE	35	0.0208333	5.58496	4.92821	0.00462862
1981	110	61	I	20	76	154	68	3.86	5.44	1	ralt	TRUE	0.48374	2	0	FALSE	4.46581	-0.939001	-16.5943	FALSE	FALSE	12	0.0721649	3.79256	4.91569	0.0038858
1982	110	62	D	80	138	154	91	3.8	4.84	1	lalt	FALSE	1.66275	2	0.139714	FALSE	5.31806	-13.9955	6.1425	FALSE	FALSE	10	0.0510204	4.29278	4.90811	0.00206498
1983	110	63	A	20	75	124	89	4.43	4.36	1	lalt	FALSE	1.46181	2	0	FALSE	10.1217	-22.8996	-3.65521	FALSE	FALSE	5	0.040404	4.62936	4.90372	0.00273212
1984	110	64	O	40	0	168	107	4.48	4.86	1	ralt	TRUE	1.36486	2	0	FALSE	-1.00989	-17.7763	-4.32289	FALSE	FALSE	20	0.05	4.32193	4.89669	0.00270798
1985	110	65	T	80	3	121	112	5.08	4.02	1	ralt	TRUE	0.331942	2	0	FALSE	-20.4062	-39.7957	20.6823	FALSE	FALSE	33	0.0792079	3.65821	4.88377	0.00189684
1986	110	66	D	80	157	193	131	5.2	4.41	0	lalt	TRUE	0.56999	2	0	FALSE	4.25041	9.16377	-10.2747	FALSE	FALSE	7	0.0196078	5.67243	4.88847	0.00359651
1987	110	67	I	20	76	154	68	5.38	4.79	1	ralt	TRUE	0.496084	2	0	FALSE	17.1071	5.24996	-6.10306	FALSE	FALSE	12	0.0776699	3.6865	4.87614	0.00356459
1988	110	68	R	40	157	193	131	3.56	4.19	1	ralt	TRUE	1.44005	2	0	FALSE	11.1052	-3.76663	4.72639	FALSE	FALSE	25	0.0576923	4.11548	4.86788	0.00164617
1989	110	69	D	80	138	154	91	5.48	4.85	1	ralt	TRUE	1.12721	2	0	FALSE	1.81085	-2.35102	14.9397	FALSE	FALSE	10	0.0571429	4.12928	4.8599	0.00189185
1990	110	70	T	80	0	168	107	4.71	5.27	0	lalt	TRUE	0.350221	2	0	FALSE	15.5838	1.71436	-8.06614	FALSE	FALSE	32	0.0188679	5.72792	4.86516	0.00372839
1991	110	71	T	80	138	154	91	4.85	4.19	0	lalt	TRUE	0.351246	2	0	FALSE	8.32665	34.7165	-48.5671	FALSE	FALSE	34	0.0186916	5.74147	4.87044	0.00553087
1992	110	72	O	40	138	154	91	4.95	3.58	0	lalt	TRUE	1.30129	2	0	FALSE	1.01673	14.727	-6.7514	FALSE	FALSE	22	0.0185185	5.75489	4.87575	0.00548243
1993	110	73	I	20	76	154	68	4.86	4.99	1	ralt	TRUE	0.446362	2	0	FALSE	17.3201	-0.0513462	-6.51957	FALSE	FALSE	12	0.0825688	3.59826	4.8635	0.00329977
1994	110	74	D	80	75	124	89	4.14	4.21	0	lalt	TRUE	0.70545	2	0	FALSE	-1.04061	16.5887	-3.47793	FALSE	FALSE	11	0.00909091	6.78136	4.87581	0.00548045
1995	110	75	R	40	75	124	89	4.3	5.34	0	lalt	TRUE	0.497597	2	0	FALSE	-4.29512	-9.6469	18.5348	FALSE	FALSE	29	0.018018	5.79442	4.88128	0.00753057
1996	110	76	R	40	76	154	68	3.5	4.19	0	lalt	TRUE	0.930607	2	0.161143	FALSE	-0.577515	-7.23823	8.81849	FALSE	FALSE	24	0.00892857	6.80735	4.89345	0.007466
1997	110	77	O	40	0	168	107	4.51	5.35	1	ralt	TRUE	1.09781	2	0	FALSE	2.43845	-17.766	-2.87848	FALSE	FALSE	20	0.0530973	4.23522	4.88674	0.00566444
1998	110	78	O	40	76	154	68	3.71	4.44	0	lalt	TRUE	0.377869	2	0	FALSE	14.4782	27.2215	-1.96011	FALSE	FALSE	18	0.0263158	5.24793	4.88804	0.00266193
[truncated: 9,281 more rows]

## Sheet: panel C information gain
	sub-102	sub-103	sub-104	sub-105	sub-106	sub-107	sub-108	sub-109	sub-110	sub-111	sub-112	sub-113	sub-114	sub-115	sub-116	sub-117	sub-118	sub-119	sub-120	sub-122	sub-123	sub-124	sub-125	sub-126	sub-127	sub-128	sub-129	sub-130	sub-131	sub-132	sub-133	sub-134	sub-135	sub-136	sub-137	sub-138	sub-139	sub-140	sub-142	sub-143	sub-144	sub-146	sub-147	sub-148	sub-149	sub-150	sub-151
0	-0.0168575	0.0199044	-0.0403314	0.0243776	0.0345349	-0.0695149	0.0582379	0.0947545	-0.0881708	0.04507	0.0353664	-0.060189	0.0712332	-0.105405	0.044409	0.026624	0.0240019	-0.10379	0.0554621	-0.0724255	0.00679236	-0.0452089	-0.152353	-0.139186	0.040162	-0.0781783	-0.116897	0.0330243	0.0512316	0.00965857	-0.0918424	-0.00553062	0.00503734	-0.0043073	0.0508943	-0.0208059	-0.130022	0.00385515	0.0830488	0.0217906	0.0106088	0.00437897	-0.0214211	0.0985095	0.0453383	-0.0145914	-0.0478306
1	-0.0167443	0.0200316	-0.0406257	0.0244627	0.0341049	-0.0698063	0.0585813	0.094325	-0.0879733	0.0450181	0.0347523	-0.0600748	0.0710237	-0.105357	0.0446163	0.0264508	0.0240545	-0.103694	0.05544	-0.0728825	0.00691837	-0.0460191	-0.152411	-0.139133	0.0403058	-0.0780945	-0.116969	0.0334048	0.0515972	0.009607	-0.0916973	-0.00577331	0.00509656	-0.00446796	0.0503976	-0.0208075	-0.129719	0.00373967	0.0831573	0.0218581	0.0105416	0.00415322	-0.0214195	0.0981245	0.0460566	-0.0141545	-0.0480094
2	-0.0166317	0.019592	-0.0409206	0.0245481	0.0336707	-0.070057	0.0589276	0.0938933	-0.0873509	0.0449644	0.0349965	-0.0599617	0.0708137	-0.105308	0.0447855	0.0262757	0.024107	-0.103403	0.0554133	-0.0733185	0.00691647	-0.0468269	-0.152468	-0.139074	0.040447	-0.0784863	-0.117043	0.033788	0.0519608	0.00955225	-0.0915526	-0.00601466	0.0051539	-0.00462177	0.0498899	-0.0208095	-0.129413	0.00362669	0.0832673	0.0219234	0.0104731	0.00324098	-0.0214095	0.097736	0.0467759	-0.0137153	-0.04819
3	-0.0165198	0.0196078	-0.041126	0.0246337	0.0332355	-0.0703458	0.0592769	0.0934594	-0.0871546	0.0449089	0.0396637	-0.0598499	0.0706031	-0.105258	0.0451836	0.0260986	0.027058	-0.103109	0.0553827	-0.0737567	0.00704439	-0.0476322	-0.152523	-0.139012	0.0405856	-0.0784023	-0.117118	0.0341738	0.0523224	0.00847343	-0.0914085	-0.0062546	0.00520935	-0.00476864	0.0493714	-0.0208118	-0.129103	0.00351617	0.0833786	0.0219866	0.0104032	0.00300908	-0.021391	0.097344	0.0474962	-0.0132737	-0.0483726
4	-0.0164085	0.0196252	-0.0414218	0.0247195	0.0327963	-0.0706333	0.0596293	0.0930234	-0.0869587	0.0448517	0.0399117	-0.0597394	0.070392	-0.105206	0.0455822	0.0259197	0.0271201	-0.102782	0.0553472	-0.0742201	0.0071723	-0.0484348	-0.152577	-0.138944	0.0407216	-0.0783166	-0.117195	0.0345622	0.0526819	0.00840937	-0.0912647	-0.00649308	0.00526292	-0.00490846	0.048842	-0.0208144	-0.12879	0.00340808	0.0834912	0.0220476	0.0103319	0.00276724	-0.0213641	0.0969485	0.0482174	-0.0128299	-0.048557
5	-0.0162978	0.0196443	-0.0417182	0.0248056	0.0323569	-0.0709194	0.0599186	0.0915061	-0.0867634	0.044793	0.039469	-0.0596301	0.0701804	-0.105152	0.0458054	0.0257391	0.0271823	-0.102483	0.0553074	-0.0746784	0.00730261	-0.0492347	-0.152629	-0.138872	0.0408551	-0.0782293	-0.117274	0.0349531	0.0530392	0.00834202	-0.0911213	-0.00673005	0.00531462	-0.00504114	0.0483003	-0.0208172	-0.128472	0.00330243	0.0836051	0.0221063	0.0102591	0.0025305	-0.0213288	0.0965496	0.0489394	-0.0123838	-0.0487436
6	-0.0162624	0.019106	-0.0420152	0.0248918	0.0319156	-0.0712039	0.0602773	0.0910629	-0.0865687	0.0447328	0.0397079	-0.0595221	0.069968	-0.105098	0.0462043	0.0255568	0.0272444	-0.102134	0.0552632	-0.0751459	0.00743417	-0.0500315	-0.15268	-0.138795	0.0409858	-0.0786179	-0.117355	0.0353466	0.0533942	0.0122132	-0.0909782	-0.00696546	0.00536446	-0.00516657	0.047749	-0.0208201	-0.128151	0.00319918	0.0837202	0.0221626	0.0101848	0.00229143	-0.0212852	0.0961471	0.0496623	-0.0119514	-0.0489323
7	-0.0151662	0.0191267	-0.0423127	0.0249781	0.0314719	-0.0714868	0.0606394	0.0906178	-0.0863745	0.0446711	0.0391141	-0.0594154	0.0697548	-0.105041	0.0466035	0.025373	0.0273067	-0.101831	0.0552149	-0.0756024	0.00756699	-0.0508253	-0.152729	-0.138714	0.0411139	-0.0789919	-0.117437	0.0357426	0.0537469	0.0121504	-0.0908353	-0.00719925	0.00541245	-0.00528466	0.0471868	-0.0208231	-0.127825	0.00309831	0.0838366	0.0221423	0.010109	0.00205011	-0.0212332	0.0957413	0.0503859	-0.011501	-0.049123
8	-0.0150542	0.0191491	-0.0426107	0.0250645	0.0310277	-0.0723327	0.0610049	0.0901709	-0.086181	0.044608	0.0382503	-0.0593099	0.0695409	-0.104983	0.047003	0.0251876	0.0273689	-0.101457	0.0551621	-0.0760736	0.0077011	-0.0516158	-0.152777	-0.138628	0.0412394	-0.0789026	-0.117521	0.0361411	0.0540594	0.0120841	-0.0906929	-0.00743139	0.0054586	-0.0053953	0.0466143	-0.0208261	-0.127508	0.00299979	0.0839541	0.0221937	0.0100316	0.00180657	-0.021173	0.0953319	0.0511102	-0.0110485	-0.0493159
9	-0.0149425	0.0191732	-0.0429096	0.025151	0.0305824	-0.0726147	0.0613738	0.0897221	-0.0859881	0.0445437	0.0384744	-0.0592057	0.0693258	-0.104922	0.0471186	0.0250009	0.0274313	-0.10115	0.055105	-0.0765465	0.00783654	-0.0525318	-0.152823	-0.138537	0.0413623	-0.0788116	-0.117606	0.036542	0.0544071	0.0112308	-0.0905493	-0.00766182	0.00550292	-0.00549839	0.0460297	-0.0208291	-0.127174	0.00290361	0.0840727	0.0222426	0.00995257	0.00156089	-0.0211046	0.0949192	0.0518351	-0.0105938	-0.0495109
10	-0.0148309	0.0187538	-0.0428972	0.0252375	0.0301341	-0.0728948	0.0617462	0.0892716	-0.085796	0.0444783	0.0381091	-0.0595684	0.0691099	-0.10486	0.0475177	0.0248129	0.0274938	-0.100779	0.0550437	-0.0770211	0.00797332	-0.052554	-0.152868	-0.138441	0.0414755	-0.078719	-0.117693	0.0369454	0.0547756	0.0102124	-0.0904068	-0.0078905	0.00554543	-0.00559384	0.0454348	-0.0208912	-0.126835	0.00280972	0.0841924	0.022289	0.00987186	0.00131312	-0.021028	0.094503	0.0525607	-0.0101371	-0.0493512
11	-0.0141343	0.0186272	-0.0432244	0.0253241	0.0296873	-0.0731731	0.0621223	0.0888194	-0.0856045	0.0444117	0.0383246	-0.0594685	0.0688931	-0.104796	0.0479169	0.0246237	0.0275565	-0.100467	0.0549781	-0.0774973	0.00811148	-0.0533334	-0.151208	-0.138341	0.0415932	-0.0786245	-0.117781	0.0373511	0.0551182	0.0101306	-0.0902643	-0.00811738	0.00558614	-0.00568155	0.044829	-0.0209575	-0.126526	0.0027181	0.0843132	0.0223328	0.00978943	0.00106331	-0.0209433	0.0940833	0.0532868	-0.00967828	-0.0495498
12	-0.0139123	0.0188083	-0.0435814	0.0254106	0.0292402	-0.0734493	0.062502	0.0883656	-0.0854139	0.0443443	0.0385369	-0.05937	0.0686751	-0.10473	0.0483161	0.0244335	0.0276194	-0.100153	0.0549084	-0.0779749	0.00824834	-0.054109	-0.149849	-0.138236	0.0417082	-0.078528	-0.117871	0.0377592	0.055697	0.0100451	-0.0901218	-0.00834241	0.00562506	-0.00576142	0.0442122	-0.0209603	-0.126178	0.00262863	0.0844349	0.0223741	0.00927181	0.000811517	-0.0208505	0.0936602	0.0516972	-0.00921745	-0.0500451
13	-0.013799	0.0188385	-0.0438806	0.0254971	0.0287929	-0.0730824	0.0628855	0.0879104	-0.085224	0.044276	0.0387458	-0.0592728	0.0684559	-0.104661	0.0490137	0.0242422	0.0276825	-0.0999296	0.0548345	-0.0784482	0.00839414	-0.0548805	-0.14988	-0.138126	0.0418206	-0.0784297	-0.117962	0.0381696	0.0560349	0.0099559	-0.0899792	-0.00854634	0.00566221	-0.00583335	0.0435845	-0.0210201	-0.125825	0.00254151	0.0845575	0.0231332	0.00918426	0.000557799	-0.0207497	0.0932337	0.0524231	-0.00875462	-0.0502489
14	-0.0136857	0.0188706	-0.0441802	0.0255836	0.0283458	-0.0733517	0.0631795	0.0874536	-0.085035	0.0442068	0.0421756	-0.059177	0.0682354	-0.104591	0.0494137	0.02405	0.0277459	-0.0996112	0.0547565	-0.0789286	0.00840101	-0.055648	-0.149909	-0.138011	0.0419305	-0.0783294	-0.118054	0.0385822	0.0562793	0.00937964	-0.0898367	-0.00876751	0.00569761	-0.00589726	0.0429462	-0.0210224	-0.125468	0.00245658	0.084681	0.0231709	0.00909481	0.000302205	-0.020641	0.0928037	0.0531495	-0.0082898	-0.050455
15	-0.0127249	0.0189045	-0.04448	0.02567	0.0278981	-0.0736188	0.0634856	0.0869955	-0.0848469	0.0441371	0.0423872	-0.0590842	0.0680136	-0.104518	0.0499067	0.023857	0.0278094	-0.0992907	0.0535958	-0.0794073	0.00854257	-0.0565375	-0.149936	-0.137891	0.0420378	-0.078227	-0.118148	0.038997	0.0566111	0.00928127	-0.0896937	-0.0089867	0.00573128	-0.00595308	0.0422972	-0.0210241	-0.125106	0.00237382	0.0848053	0.023206	0.00900339	4.4786e-05	-0.0205245	0.0923702	0.0538761	-0.00782301	-0.0506637
16	-0.0126088	0.019102	-0.0447801	0.0257562	0.0274519	-0.0738835	0.0638805	0.086536	-0.0846598	0.0440669	0.0425959	-0.0589912	0.0677905	-0.104442	0.0503069	0.0236633	0.0278733	-0.0989681	0.0535068	-0.0798899	0.0086875	-0.0572962	-0.149961	-0.137767	0.0421425	-0.0781219	-0.118242	0.0394139	0.0569399	0.00917888	-0.0895505	-0.00920388	0.00660553	-0.00608185	0.0416372	-0.0211324	-0.124739	0.0022932	0.0849304	0.0232384	0.00890996	-0.000214408	-0.0204003	0.0919333	0.0546031	-0.0073572	-0.0510672
17	-0.0127919	0.0191404	-0.0450804	0.0258424	0.0270051	-0.0735163	0.0642794	0.0860754	-0.0844736	0.0439962	0.0428016	-0.0588996	0.0675658	-0.104364	0.0507067	0.0234689	0.0279375	-0.0986435	0.0534136	-0.0803736	0.00883102	-0.0580504	-0.149984	-0.137638	0.0422446	-0.0780152	-0.118338	0.0386394	0.0572657	0.00907246	-0.0894069	-0.009419	0.00663816	-0.00612141	0.0409666	-0.0211334	-0.124366	0.00221473	0.0850561	0.0234792	0.00881443	-0.000475328	-0.0202683	0.0914928	0.0553303	-0.00688653	-0.0512805
18	-0.012676	0.0191809	-0.0453808	0.0259284	0.0265579	-0.0737743	0.0646824	0.0856136	-0.0842885	0.0439251	0.0430044	-0.0588095	0.0673395	-0.10433	0.0509141	0.023274	0.028002	-0.098317	0.0533164	-0.0808582	0.008979	-0.0588	-0.150004	-0.137504	0.0423443	-0.0779063	-0.118435	0.039059	0.0575883	0.00896209	-0.0892631	-0.00963203	0.00666914	-0.00615259	0.0402854	-0.0211337	-0.123988	0.00213833	0.0851826	0.0235067	0.00871675	-0.000737928	-0.0201288	0.0910489	0.0560577	-0.00641393	-0.0514961
19	-0.0125597	0.0192235	-0.0456815	0.0260143	0.026115	-0.0740297	0.0650895	0.0851507	-0.0841044	0.0438539	0.0432043	-0.0587212	0.0671117	-0.104246	0.0511214	0.0230786	0.0280668	-0.0979886	0.0532154	-0.0813436	0.00912894	-0.0595449	-0.150023	-0.137365	0.0424433	-0.0777957	-0.118533	0.0394804	0.0579076	0.00884754	-0.0891188	-0.00984292	0.00669849	-0.00605244	0.0395935	-0.0211334	-0.123605	0.002064	0.0853096	0.0235316	0.00861684	-0.00100216	-0.0199819	0.0912626	0.0567852	-0.0057555	-0.0517141
20	-0.012443	0.0193685	-0.0459822	0.0260999	0.0256736	-0.0742825	0.0655008	0.0845483	-0.0839214	0.0437825	0.0424146	-0.058634	0.0668821	-0.10416	0.0513536	0.0228828	0.028132	-0.0978278	0.0531102	-0.0818297	0.00928007	-0.0602849	-0.150039	-0.137222	0.0425379	-0.0764032	-0.118631	0.0399037	0.0582237	0.00872884	-0.0889742	-0.0101319	0.00672624	-0.00606622	0.0388895	-0.0211322	-0.123217	0.00199168	0.0854372	0.0235537	0.00851464	-0.00126799	-0.0198275	0.090813	0.0553088	-0.00527851	-0.0519345
21	-0.0123257	0.0194158	-0.046283	0.0261854	0.0252341	-0.0745326	0.0659164	0.0832536	-0.0837396	0.0437112	0.0431667	-0.0585483	0.0666507	-0.104071	0.0517494	0.0226867	0.0281975	-0.097496	0.0530014	-0.0823164	0.00979065	-0.0610199	-0.150052	-0.13885	0.04263	-0.0767781	-0.118731	0.0403288	0.0585363	0.00860593	-0.0888289	-0.0103385	0.00675236	-0.00607139	0.0381764	-0.0211302	-0.12246	0.00192139	0.0855652	0.0235731	0.00841008	-0.00180417	-0.0196658	0.0903598	0.0560327	-0.00484067	-0.0521572
22	-0.0122078	0.0194654	-0.0466331	0.0262707	0.0247966	-0.0747799	0.0663364	0.0827863	-0.083559	0.0436399	0.0433573	-0.0584641	0.0664175	-0.103979	0.0521442	0.0224904	0.0282634	-0.0971623	0.0528888	-0.0828036	0.00994627	-0.0617498	-0.150064	-0.138703	0.0427196	-0.0766575	-0.118831	0.0407557	0.0588455	0.00847877	-0.0886831	-0.010543	0.00677698	-0.00606787	0.0374527	-0.0211273	-0.12206	0.00185309	0.0856936	0.0234212	0.00830309	-0.0017167	-0.019497	0.089903	0.0567565	-0.00435996	-0.0523823
23	-0.0120893	0.0195173	-0.0470027	0.0263557	0.0243613	-0.0750244	0.0667607	0.0823184	-0.0833796	0.0435689	0.0435452	-0.058383	0.0661824	-0.103884	0.0525381	0.0222939	0.0283298	-0.096827	0.0527723	-0.0832912	0.0101035	-0.0624744	-0.150072	-0.138552	0.0428068	-0.0770416	-0.118932	0.0411841	0.0584518	0.00736781	-0.0885367	-0.0107451	0.00680009	-0.0060556	0.0367188	-0.0211855	-0.121654	0.00178674	0.0858224	0.0234348	0.00819359	-0.00198535	-0.0193211	0.0894427	0.0574802	-0.00387736	-0.0526099
24	-0.01197	0.0195715	-0.047304	0.0264404	0.0239286	-0.0752659	0.0671895	0.0862541	-0.0832015	0.0434982	0.0437307	-0.0583019	0.0659453	-0.103786	0.0527244	0.0220974	0.0283965	-0.0966702	0.0526521	-0.0837916	0.0102595	-0.0631938	-0.150079	-0.138396	0.0428915	-0.0769172	-0.119034	0.0416142	0.0587514	0.0072288	-0.0883899	-0.0109449	0.00682171	-0.00603448	0.0359742	-0.0212438	-0.121242	0.00172231	0.0859515	0.0234458	0.0080815	-0.0022554	-0.0191383	0.0889787	0.0582037	-0.00339286	-0.0528397
25	-0.0118499	0.0196282	-0.0476054	0.026525	0.0234987	-0.0755044	0.0676227	0.0858	-0.0830248	0.0434279	0.0439136	-0.0582225	0.0657058	-0.103684	0.0531154	0.0219009	0.0284637	-0.0964773	0.0525282	-0.0842796	0.0104203	-0.0639077	-0.150082	-0.138235	0.0429738	-0.0767901	-0.119137	0.0420457	0.0589845	0.00708536	-0.0882422	-0.0111423	0.00684186	-0.00600446	0.0352193	-0.0212381	-0.120825	0.00165977	0.0860808	0.0234542	0.00796676	-0.00252683	-0.0189486	0.088511	0.0589269	-0.0029077	-0.053072
26	-0.0120008	0.0196873	-0.0479066	0.0266092	0.0230716	-0.0757398	0.0679843	0.0853456	-0.0828495	0.0433582	0.044094	-0.0581448	0.0654645	-0.103579	0.053505	0.0217044	0.0285313	-0.0961373	0.0524011	-0.0847939	0.0105826	-0.0646161	-0.150083	-0.130553	0.0430536	-0.0766604	-0.11924	0.0424786	0.0592764	0.00693744	-0.0880937	-0.0113373	0.00686058	-0.00596546	0.0344541	-0.0212313	-0.120401	0.00159911	0.0862102	0.0234599	0.00717561	-0.00279959	-0.0187523	0.0880397	0.0596498	-0.00241939	-0.0533067
27	-0.0118799	0.019749	-0.0482077	0.0266931	0.0226551	-0.075972	0.0684266	0.0837559	-0.0826757	0.0432891	0.0442721	-0.0580687	0.0652209	-0.103471	0.053893	0.0215081	0.0285993	-0.0957959	0.05227	-0.0853414	0.0107466	-0.0653189	-0.150082	-0.130364	0.0431311	-0.0765279	-0.119344	0.0429128	0.0589688	0.00568913	-0.0879444	-0.0117782	0.0068779	-0.00591743	0.0336787	-0.0212232	-0.119972	0.00154027	0.0863397	0.0234632	0.00705289	-0.00307366	-0.0185493	0.0875647	0.0603724	-0.00192918	-0.0535438
28	-0.0117581	0.0197168	-0.0485087	0.0267767	0.0222333	-0.0762011	0.0688736	0.0832979	-0.0825033	0.0432208	0.0432719	-0.0579944	0.0649751	-0.103428	0.0542794	0.0213119	0.0286678	-0.0954531	0.0521353	-0.0858294	0.0109094	-0.0660159	-0.150077	-0.13017	0.0432063	-0.0765782	-0.119448	0.0433482	0.0592519	0.00552889	-0.0877944	-0.0119688	0.00689386	-0.0058603	0.0328929	-0.0212499	-0.119537	0.00148324	0.0864692	0.0234639	0.00692726	-0.00334899	-0.01834	0.0870859	0.0610944	-0.00143705	-0.0537832
29	-0.0116353	0.0197836	-0.0489337	0.02686	0.0218165	-0.072125	0.0693252	0.0828397	-0.0823325	0.0431534	0.0434413	-0.0579234	0.0647269	-0.103313	0.0546641	0.0211159	0.0287368	-0.0939031	0.051997	-0.0863171	0.0110737	-0.0667071	-0.15007	-0.129972	0.0432791	-0.0765736	-0.119552	0.0437847	0.0594724	0.00536403	-0.0876434	-0.0121569	0.00690849	-0.00579407	0.0320972	-0.0211399	-0.119096	0.00142799	0.0865986	0.0234622	0.00679866	-0.00362557	-0.0181243	0.0866033	0.0618159	-0.000942994	-0.0540251
30	-0.0118521	0.019977	-0.0492344	0.0269429	0.0214016	-0.0723279	0.0697815	0.0823815	-0.0821633	0.0430869	0.0436083	-0.0578526	0.0644763	-0.103217	0.0550467	0.0209203	0.0314769	-0.0935567	0.0518558	-0.0868042	0.0112428	-0.0673924	-0.150226	-0.129769	0.0433496	-0.0764333	-0.119657	0.0442223	0.0597472	0.0051946	-0.0874916	-0.0124267	0.00692182	-0.00571857	0.0312916	-0.0211276	-0.118649	0.00137443	0.0867278	0.0234582	0.00666701	-0.00390336	-0.0179024	0.0861168	0.0625368	-0.000446995	-0.0542692
31	-0.0117282	0.0200497	-0.049668	0.0270255	0.0209942	-0.0725273	0.0702426	0.0819234	-0.0819958	0.0430215	0.0431094	-0.0577836	0.064223	-0.103095	0.0554273	0.0207248	0.0315573	-0.0931564	0.0517106	-0.0872908	0.0114136	-0.0680717	-0.150212	-0.129562	0.0434177	-0.0723062	-0.119762	0.0446609	0.0600179	0.00502038	-0.0873388	-0.0126098	0.0069339	-0.0056338	0.030476	-0.0211139	-0.118196	0.00132256	0.0868568	0.0234518	0.00653222	-0.00419452	-0.0176745	0.0856265	0.0632571	5.09611e-05	-0.0546423
32	-0.0116032	0.0201253	-0.0499686	0.0271077	0.0205895	-0.0727231	0.0707085	0.0814655	-0.08183	0.0429574	0.0432705	-0.0577165	0.0631862	-0.102965	0.0558055	0.0204822	0.0316384	-0.0928081	0.0515621	-0.0877779	0.0115862	-0.0687448	-0.150196	-0.129351	0.0434836	-0.0721454	-0.119867	0.0451002	0.0602844	0.00484141	-0.0871851	-0.0127902	0.00694476	-0.00553972	0.0296494	-0.0211455	-0.117802	0.00127242	0.0869855	0.0234433	0.00621338	-0.00448042	-0.0174407	0.0851323	0.0639766	0.000550893	-0.0548917
33	-0.0105329	0.0202038	-0.0503247	0.0271895	0.0201892	-0.0729152	0.0711791	0.0810078	-0.0816659	0.0428945	0.0434295	-0.0576528	0.0629245	-0.102834	0.0558913	0.0202874	0.0317201	-0.0925396	0.0514103	-0.0882652	0.0117604	-0.0694118	-0.150177	-0.129135	0.0435473	-0.0719807	-0.119972	0.0455403	0.060484	0.00465765	-0.0870303	-0.0129679	0.00695444	-0.00543626	0.0288143	-0.0211287	-0.117336	0.00122392	0.0871137	0.0234326	0.00607172	-0.00476172	-0.0172011	0.0846341	0.0646953	0.00102234	-0.0551434
34	-0.0104026	0.0202854	-0.0506249	0.0272709	0.0197935	-0.0731037	0.0716545	0.0798858	-0.0815036	0.042833	0.0435863	-0.0575896	0.06266	-0.1027	0.0563783	0.0200932	0.0318023	-0.0921323	0.0512553	-0.0887492	0.0119364	-0.0700725	-0.150222	-0.128915	0.0436087	-0.0722414	-0.120078	0.0459811	0.0607416	0.00446906	-0.0868743	-0.0131429	0.00696299	-0.00532342	0.0279695	-0.0211103	-0.116864	0.00117703	0.0872414	0.0234199	0.00592671	-0.00504414	-0.016956	0.082854	0.065413	0.00152615	-0.0553976
35	-0.0107443	0.02037	-0.0509246	0.0273519	0.0194074	-0.0732884	0.0721349	0.0794277	-0.0813433	0.042773	0.0437411	-0.0575283	0.0623927	-0.102562	0.0565521	0.0198992	0.0318851	-0.0917171	0.051097	-0.089232	0.0121141	-0.0707268	-0.150196	-0.128691	0.0436679	-0.0724649	-0.120183	0.0464223	0.0609418	0.00427559	-0.0867174	-0.0134075	0.00697045	-0.00520109	0.0271151	-0.0210902	-0.116386	0.00113172	0.0873684	0.0234052	0.00577828	-0.00532764	-0.0167053	0.0823448	0.0661298	0.00203201	-0.055654
36	-0.0106131	0.0204577	-0.0512239	0.0274325	0.019018	-0.0734692	0.0726201	0.0789701	-0.0811848	0.0427146	0.0438938	-0.0574692	0.0621226	-0.10242	0.0569188	0.0197058	0.0319685	-0.0913653	0.0509355	-0.0897136	0.0122903	-0.0713747	-0.150166	-0.128463	0.0437249	-0.0722937	-0.120288	0.046864	0.0611904	0.00407722	-0.0865594	-0.013577	0.00697686	-0.00506927	0.0262526	-0.0210683	-0.115902	0.00108794	0.0874948	0.0233887	0.00562637	-0.00560108	-0.0164494	0.0818314	0.0668456	0.00253993	-0.0559128
37	-0.0106176	0.0206613	-0.0515227	0.0275127	0.0186372	-0.0736463	0.0731103	0.0785132	-0.0810283	0.042658	0.0440445	-0.0574121	0.0618496	-0.102273	0.0573307	0.0195129	0.0320524	-0.0910129	0.050771	-0.0901937	0.0124714	-0.0720161	-0.150133	-0.12823	0.0437797	-0.0721191	-0.120393	0.047306	0.0614344	0.00387388	-0.0864002	-0.0137436	0.00698227	-0.0049279	0.0253788	-0.0210445	-0.115412	0.00104567	0.0876203	0.0233705	0.0054709	-0.00588667	-0.0161883	0.0813139	0.0675602	0.00304995	-0.0561739
38	-0.0104843	0.0207558	-0.0517523	0.0275924	0.0182616	-0.0738194	0.0736053	0.0780572	-0.0808739	0.0426031	0.0441932	-0.0573572	0.0615736	-0.102122	0.057691	0.0193204	0.0321369	-0.09066	0.0506035	-0.0906723	0.012654	-0.0726509	-0.150097	-0.127994	0.0438325	-0.0719409	-0.120498	0.0477482	0.0616738	0.00431824	-0.08624	-0.0139073	0.00698673	-0.00477695	0.0244965	-0.021019	-0.114915	0.00100487	0.0877449	0.0233506	0.00531181	-0.00618134	-0.0159222	0.0807922	0.0682737	0.00356209	-0.0564373
39	-0.0103499	0.021345	-0.0520497	0.0276717	0.0178915	-0.0739886	0.0741052	0.0776021	-0.0807215	0.04255	0.04434	-0.0573044	0.0612945	-0.101967	0.0580476	0.0191285	0.0322219	-0.0903067	0.050433	-0.0911492	0.0128383	-0.073279	-0.150056	-0.127754	0.0438832	-0.0717592	-0.120602	0.0481904	0.0619086	0.00410714	-0.0860784	-0.0140679	0.00699029	-0.00461639	0.023605	-0.0209914	-0.11446	0.000965509	0.0878684	0.0233293	0.00514903	-0.00646899	-0.0156512	0.0802662	0.0689858	0.0040764	-0.056703
40	-0.0102141	0.0214481	-0.0523465	0.0277505	0.0175254	-0.0741538	0.07461	0.0771479	-0.0805712	0.0424989	0.0444848	-0.057254	0.0610122	-0.101808	0.0584006	0.0189371	0.0323075	-0.0898855	0.0502595	-0.0916762	0.0130242	-0.0739004	-0.150012	-0.12751	0.0439318	-0.0715738	-0.120706	0.0486327	0.0620666	0.00389082	-0.0859156	-0.0142256	0.00699301	-0.00444618	0.0227034	-0.0208385	-0.114023	0.000927549	0.0879908	0.0233066	0.00498249	-0.00675764	-0.0153755	0.0797359	0.0696966	0.00465218	-0.0569709
41	-0.0118415	0.0216398	-0.0526425	0.0278288	0.0171666	-0.074315	0.0751197	0.076695	-0.0804231	0.0424498	0.0446276	-0.0547213	0.0607269	-0.101644	0.0587495	0.0187462	0.0323935	-0.0895315	0.0500833	-0.0921494	0.0132235	-0.074515	-0.150846	-0.127262	0.0439783	-0.0713849	-0.12081	0.0490747	0.0622189	0.00366969	-0.0857518	-0.0143801	0.00699493	-0.0042663	0.0217941	-0.0216186	-0.113507	0.000890953	0.0881086	0.0232827	0.00481214	-0.00704727	-0.0150952	0.0792013	0.070406	0.00517108	-0.057241
42	-0.011708	0.0217504	-0.0529378	0.0279066	0.0168137	-0.0744721	0.0756342	0.0808236	-0.0802773	0.0424028	0.0447686	-0.0546669	0.0604383	-0.101475	0.0590943	0.0185557	0.0324801	-0.0891774	0.0499044	-0.0926205	0.0134128	-0.0751227	-0.150797	-0.127011	0.0440228	-0.0711921	-0.120913	0.0495165	0.0624032	0.00344334	-0.0855864	-0.0145315	0.00699611	-0.0040767	0.0208761	-0.0215875	-0.112985	0.000855707	0.0882283	0.0232576	0.0046379	-0.0073448	-0.0148105	0.0786623	0.0711138	0.00569225	-0.0575134
43	-0.0115733	0.0218646	-0.0532323	0.027984	0.0164667	-0.0746251	0.0761535	0.080387	-0.0801337	0.0423579	0.0449077	-0.0546148	0.0601464	-0.101302	0.0594347	0.0183657	0.0312531	-0.0888231	0.0497227	-0.0930893	0.0136034	-0.0757234	-0.150745	-0.126756	0.0440654	-0.0709954	-0.121015	0.0499579	0.0625571	0.00321184	-0.0854197	-0.0146797	0.00699662	-0.00393002	0.0199496	-0.0197926	-0.112456	0.000821778	0.0883464	0.0229776	0.00445971	-0.00763636	-0.0145216	0.0781189	0.0718201	0.00621571	-0.0577879
44	-0.0114374	0.0219825	-0.053526	0.0280609	0.0161259	-0.0747741	0.0766777	0.078935	-0.0799925	0.0423153	0.0450448	-0.054565	0.0598512	-0.101124	0.0597704	0.0181099	0.0313349	-0.0887227	0.0495384	-0.0935556	0.0137918	-0.0763172	-0.150687	-0.126497	0.044106	-0.0707949	-0.121116	0.0503988	0.0627668	0.00297516	-0.0852515	-0.0148247	0.00699652	-0.00379505	0.0190146	-0.0197514	-0.111921	0.000789056	0.0884629	0.0233732	0.00427753	-0.00793095	-0.0142286	0.077571	0.0725246	0.00674152	-0.0580647
45	-0.0113003	0.0223049	-0.0538801	0.0281372	0.0157913	-0.074919	0.0772065	0.0779362	-0.0798536	0.042275	0.04518	-0.0545177	0.0595526	-0.100971	0.0599688	0.0179207	0.0314172	-0.0883148	0.0493516	-0.0940194	0.0139816	-0.0769684	-0.150626	-0.126235	0.0441447	-0.0708033	-0.121217	0.050839	0.0629715	0.00476806	-0.085082	-0.0149363	0.00699587	-0.00357668	0.0180743	-0.019708	-0.11138	0.000757559	0.0885775	0.0233461	0.0040913	-0.00822438	-0.0139316	0.0770186	0.0732274	0.00725726	-0.0583436
46	-0.011162	0.0224312	-0.0541758	0.028213	0.015463	-0.0750597	0.0778048	0.0773709	-0.0797172	0.0422371	0.0453135	-0.0544729	0.0592506	-0.100784	0.0602943	0.017732	0.0314997	-0.0879017	0.0491623	-0.0944804	0.0141764	-0.0775476	-0.15056	-0.12597	0.0441815	-0.0705958	-0.121317	0.0512784	0.0631711	0.00452814	-0.0849111	-0.0150745	0.00699474	-0.00334852	0.0171221	-0.0196622	-0.110831	0.000727263	0.0886942	0.0233185	0.00390095	-0.00851872	-0.0136308	0.0764617	0.0739284	0.00777032	-0.0586246
47	-0.0110226	0.0225615	-0.0544667	0.0282884	0.0151412	-0.0751962	0.0783431	0.0769331	-0.0795832	0.0422014	0.0454452	-0.0544306	0.058945	-0.100651	0.0606145	0.0175435	0.0315826	-0.0875478	0.0489705	-0.0949195	0.0143726	-0.0781196	-0.15049	-0.125701	0.0442164	-0.0708493	-0.121415	0.0517169	0.063304	0.00428293	-0.0847387	-0.0152094	0.00699319	-0.00311056	0.0161625	-0.0196141	-0.110349	0.000698099	0.0888049	0.0232906	0.00370644	-0.00881396	-0.0133264	0.0759002	0.0746274	0.00830327	-0.0589077
48	-0.010882	0.0226236	-0.0547565	0.0283632	0.0148259	-0.0753286	0.0787821	0.0764972	-0.0794517	0.0421683	0.0455749	-0.0543908	0.0577198	-0.100454	0.0603978	0.0173553	0.0316657	-0.0871943	0.0487765	-0.0953722	0.0145701	-0.0786843	-0.150414	-0.126913	0.0442787	-0.0706366	-0.121513	0.0521544	0.0634931	0.00403246	-0.0845649	-0.0153409	0.00699131	-0.0028628	0.015195	-0.0195635	-0.109788	0.000670064	0.0889133	0.0232624	0.00350772	-0.00911008	-0.0130184	0.0753341	0.0753244	0.00883872	-0.0591927
49	-0.0107404	0.0229037	-0.0550451	0.0284375	0.0145172	-0.0754568	0.0793294	0.0760635	-0.0793227	0.0421376	0.0455302	-0.0543537	0.0574023	-0.100252	0.0607048	0.0170904	0.0317492	-0.0868413	0.0485802	-0.095824	0.0147644	-0.0792417	-0.150334	-0.126643	0.0443101	-0.0704196	-0.121609	0.0525907	0.0636259	0.0037768	-0.0843895	-0.0154688	0.00698917	-0.00260521	0.0142193	-0.0195762	-0.109321	0.000643079	0.0890194	0.0232343	0.00330474	-0.00940707	-0.0127072	0.0747634	0.0760193	0.00937673	-0.0595314
50	-0.0105976	0.0230464	-0.0552221	0.0305618	0.01421	-0.0755809	0.0798811	0.0741062	-0.0791964	0.0421094	0.0456557	-0.0543194	0.0570811	-0.100095	0.0610059	0.0169028	0.0318327	-0.0867703	0.0483817	-0.0962724	0.0149642	-0.0797917	-0.150249	-0.126369	0.0443397	-0.0701983	-0.121704	0.0530257	0.0638044	0.00351574	-0.0842126	-0.0159639	0.00698684	-0.0023378	0.0132364	-0.0195209	-0.108748	0.000617157	0.0891229	0.0232063	0.00309746	-0.00970492	-0.0123927	0.0741879	0.076712	0.00991732	-0.0598205
51	-0.0104538	0.0231932	-0.0555077	0.0306435	0.0139148	-0.0757008	0.0804372	0.0777302	-0.0790727	0.0420838	0.0457792	-0.0542877	0.0558997	-0.099883	0.0613008	0.0167154	0.0319163	-0.0863448	0.0481815	-0.0967174	0.0151652	-0.0803342	-0.150159	-0.126093	0.0443676	-0.0699728	-0.121797	0.0534592	0.0639346	0.00324935	-0.0840341	-0.0160858	0.00698441	-0.00206055	0.0122455	-0.0194632	-0.108167	0.000592237	0.0892238	0.0244061	0.00288584	-0.00994801	-0.0120752	0.0736079	0.0774025	0.0104605	-0.0601115
52	-0.010309	0.0233442	-0.0557919	0.0307248	0.0136236	-0.0758166	0.0809977	0.0779425	-0.0789516	0.0420607	0.0457856	-0.0542589	0.0555677	-0.0996661	0.0615893	0.0165282	0.032	-0.0859939	0.0479793	-0.0971588	0.0153672	-0.0808693	-0.150085	-0.125813	0.0443938	-0.069743	-0.121889	0.0538912	0.0641024	0.00297761	-0.083854	-0.0162041	0.00698196	-0.00177349	0.0112474	-0.0194029	-0.10758	0.000568249	0.0893218	0.0243816	0.00266984	-0.010244	-0.0117548	0.073023	0.0780906	0.0110065	-0.0604043
53	-0.0101632	0.0234996	-0.0560746	0.0308056	0.0133422	-0.0759282	0.0815625	0.0775247	-0.0788332	0.0420402	0.0459054	-0.0542329	0.0552318	-0.0994439	0.0618711	0.0163411	0.0320838	-0.0856437	0.0477748	-0.0976231	0.0155703	-0.0813968	-0.149984	-0.125531	0.0444184	-0.0695088	-0.121979	0.0618683	0.0642648	0.00270049	-0.0836723	-0.0163186	0.00697959	-0.00147661	0.0102419	-0.01934	-0.106987	0.00054519	0.0894169	0.0243578	0.00244941	-0.0105442	-0.0114316	0.0724334	0.0787763	0.0115551	-0.0606991
54	-0.0100164	0.023794	-0.0563558	0.030886	0.0130677	-0.0752757	0.0821314	0.0765174	-0.0787176	0.0420223	0.0460232	-0.0542099	0.0548919	-0.0992165	0.0618418	0.0161541	0.0321675	-0.0855243	0.0475686	-0.0980383	0.0157742	-0.0819167	-0.150623	-0.125246	0.0444414	-0.0685957	-0.122068	0.0623207	0.0643493	0.00241797	-0.0834889	-0.0162636	0.00697737	-0.00116992	0.00923019	-0.0190506	-0.106387	0.000523039	0.0895088	0.0243348	0.00222454	-0.0108451	-0.0111058	0.0718391	0.0794595	0.0121065	-0.0609957
55	-0.00986882	0.0239587	-0.0566353	0.0257338	0.0128003	-0.0753767	0.0827044	0.0761037	-0.0786047	0.0420069	0.0461391	-0.0541898	0.0545481	-0.0989839	0.0621086	0.0159672	0.0322512	-0.0851766	0.0473605	-0.0984679	0.0159789	-0.082429	-0.150514	-0.121665	0.0444628	-0.0683502	-0.122155	0.0627714	0.0645006	0.00213014	-0.0833028	-0.0163699	0.00697541	-0.000853427	0.00821018	-0.0189815	-0.105781	0.000501712	0.0895973	0.0243129	0.00199519	-0.0111468	-0.0107776	0.07124	0.0801401	0.0126607	-0.061294
56	-0.00972037	0.0241278	-0.0569132	0.0257954	0.0125399	-0.0754735	0.0832814	0.075693	-0.0784947	0.0419941	0.0454213	-0.0541728	0.0542002	-0.0987459	0.0623679	0.0157802	0.0323347	-0.0848299	0.0471509	-0.0988862	0.0161845	-0.0829335	-0.150398	-0.121365	0.0444827	-0.068099	-0.12224	0.0632201	0.0638708	0.00183678	-0.0831165	-0.0164724	0.0069738	-0.000527142	0.00718531	-0.0189098	-0.105168	0.000481193	0.0896824	0.0242921	0.00176133	-0.0114493	-0.010447	0.070636	0.0808181	0.0132178	-0.0615943
57	-0.0083092	0.0234302	-0.0571894	0.0258565	0.0122866	-0.0755662	0.0838623	0.0752855	-0.0783875	0.041984	0.0455306	-0.0541588	0.053848	-0.0984946	0.0626197	0.0155931	0.032418	-0.0844114	0.0469396	-0.099307	0.0163927	-0.0834303	-0.150277	-0.121062	0.0445011	-0.0678442	-0.122323	0.0636668	0.0640087	0.00153799	-0.0829281	-0.0165709	0.00697264	-0.000191076	0.00615298	-0.0188352	-0.104613	0.000461438	0.0897608	0.0242726	0.00152294	-0.0124325	-0.0101142	0.0700272	0.0814933	0.0137778	-0.0619881
58	-0.00815496	0.0236048	-0.0574637	0.0259169	0.0120367	-0.0756549	0.084447	0.0748811	-0.0782831	0.0419762	0.045638	-0.0541498	0.0534918	-0.0982457	0.0628637	0.0154059	0.032501	-0.0840668	0.0467269	-0.0997233	0.0165995	-0.0840657	-0.15015	-0.120757	0.0445181	-0.0679812	-0.122403	0.0641113	0.0641411	0.00123374	-0.0827379	-0.0166655	0.00697203	0.000154735	0.00511493	-0.0187579	-0.103988	0.00044241	0.0898383	0.0242547	0.00128	-0.0127467	-0.00977938	0.0694136	0.0821657	0.0143204	-0.0622919
59	-0.008	0.0237839	-0.057736	0.0259766	0.0117976	-0.0757395	0.0850353	0.0744801	-0.0781816	0.0419711	0.0457434	-0.0541422	0.0531315	-0.0979913	0.0631258	0.0152185	0.0325837	-0.0836502	0.0465133	-0.100135	0.0168036	-0.0845472	-0.150042	-0.12045	0.0445337	-0.06668	-0.122482	0.0645536	0.0642679	0.000924024	-0.0825462	-0.016756	0.00697207	0.000510275	0.00406993	-0.0186777	-0.103355	0.000424076	0.0899119	0.0242385	0.00103248	-0.0130634	-0.00944265	0.0687952	0.0828352	0.0148863	-0.0625972
60	-0.00784439	0.0241386	-0.0580665	0.0260358	0.0115636	-0.0758201	0.0856271	0.0740823	-0.078083	0.0419683	0.0458468	-0.0541378	0.0527669	-0.0977313	0.0633534	0.0150308	0.032666	-0.083308	0.046298	-0.100542	0.017141	-0.0850208	-0.149902	-0.120139	0.044548	-0.0664083	-0.122558	0.0649935	0.064389	0.000608836	-0.0823522	-0.0168424	0.00697288	0.000875519	0.00301968	-0.0186283	-0.102765	0.000406382	0.0899814	0.0242242	0.000780378	-0.0133711	-0.00910414	0.0681719	0.0835017	0.0154552	-0.062904
61	-0.00768818	0.0243278	-0.0581183	0.0260943	0.0113364	-0.0758968	0.0862224	0.0736879	-0.0779874	0.0419678	0.0459482	-0.0541367	0.0523981	-0.0974657	0.0635725	0.0148428	0.0327477	-0.0832108	0.0460815	-0.100943	0.0173495	-0.0854865	-0.149756	-0.119827	0.0445609	-0.0661317	-0.122632	0.0654308	0.0645045	0.000287816	-0.0821566	-0.0169246	0.00697456	0.00125044	0.00196356	-0.0185424	-0.10212	0.000389341	0.0900465	0.0242119	0.000523676	-0.0136795	-0.00876398	0.0675437	0.0841652	0.0160273	-0.0632123
62	-0.00753144	0.0247972	-0.0583837	0.0261522	0.0111188	-0.0759695	0.086821	0.0732973	-0.0778947	0.0419697	0.0448729	-0.054139	0.0520249	-0.0971327	0.0637828	0.0146545	0.0328289	-0.0828721	0.045864	-0.10134	0.0175582	-0.0859441	-0.150507	-0.119512	0.0445727	-0.06585	-0.122703	0.0658655	0.0646143	-3.83365e-05	-0.0819592	-0.0170027	0.00697721	0.001635	0.000901856	-0.0184106	-0.101479	0.000372821	0.090107	0.0242018	0.000262365	-0.0139886	-0.0084223	0.0669106	0.0848255	0.0165595	-0.0633694
63	-0.00737423	0.0249972	-0.0586468	0.0262094	0.0109083	-0.0760383	0.0874228	0.0729103	-0.077805	0.0419738	0.0449661	-0.0541455	0.0516473	-0.0968556	0.0639842	0.0144656	0.0329093	-0.0825348	0.0456454	-0.101731	0.017767	-0.0863938	-0.150351	-0.119195	0.0445832	-0.0655631	-0.122772	0.0662974	0.0647184	-0.000535111	-0.08176	-0.0170764	0.00698096	0.00202916	-0.000165461	-0.0183187	-0.100821	0.00035682	0.0901629	0.0241941	-3.56125e-06	-0.0143345	-0.00807924	0.0662727	0.0854827	0.0171163	-0.0636803
64	-0.00721663	0.0252019	-0.0589076	0.026266	0.0107049	-0.0761033	0.0880275	0.0725271	-0.0777183	0.0419802	0.0450571	-0.0541546	0.0512654	-0.0965726	0.0641764	0.0142762	0.0329891	-0.0821991	0.0454261	-0.102117	0.0179757	-0.0868353	-0.150187	-0.118876	0.0445849	-0.065271	-0.122838	0.0667264	0.0648168	-0.000873191	-0.0815588	-0.0171458	0.00698592	0.00243291	-0.00123823	-0.0182238	-0.100156	0.000341309	0.090214	0.024189	-0.000274105	-0.0146448	-0.0077349	0.0656299	0.0861366	0.0176805	-0.0639927
65	-0.0070587	0.0254116	-0.059242	0.026322	0.0105066	-0.0761644	0.0886352	0.0721478	-0.0776346	0.0419887	0.0451459	-0.0541672	0.050879	-0.0962837	0.0640075	0.0140863	0.0330681	-0.081865	0.0452059	-0.102497	0.0181845	-0.0872687	-0.150016	-0.118554	0.0445932	-0.0654907	-0.122901	0.0671523	0.0649094	-0.00121684	-0.0813558	-0.0172108	0.0069922	0.00284616	-0.00231624	-0.0181259	-0.0994853	0.000326216	0.09026	0.0241865	-0.00130866	-0.0149557	-0.00738942	0.0649821	0.0867873	0.018265	-0.064306
66	-0.00690053	0.0256262	-0.0594981	0.0263773	0.0103173	-0.0762218	0.0892456	0.0717723	-0.0775539	0.0419993	0.0455263	-0.0541834	0.0504881	-0.095989	0.0641795	0.0138957	0.0331461	-0.0820127	0.0449852	-0.102871	0.01839	-0.0876939	-0.149838	-0.11823	0.0446005	-0.0651903	-0.122962	0.0675752	0.0649963	-0.00156599	-0.0811507	-0.0172714	0.00699992	0.00326889	-0.00339933	-0.0179409	-0.0988077	0.000311509	0.0903008	0.024187	-0.00159143	-0.0152672	-0.00704291	0.0643296	0.0874345	0.0188529	-0.0646207
67	-0.00674219	0.0258457	-0.0597517	0.026432	0.0101385	-0.0762755	0.0898586	0.0714009	-0.0774763	0.0420118	0.0456123	-0.0542031	0.0500926	-0.0956882	0.0643418	0.0137043	0.0332232	-0.0816827	0.0447639	-0.10324	0.0185982	-0.0881109	-0.149672	-0.117904	0.0446068	-0.0648846	-0.123019	0.0679948	0.0650775	-0.00164867	-0.0809438	-0.0173274	0.00700919	0.00370108	-0.00448734	-0.0178365	-0.0981648	0.000297143	0.0903361	0.0241905	-0.00187884	-0.0155792	-0.00669548	0.0636721	0.0880783	0.0194686	-0.0649363
68	-0.00658375	0.0260702	-0.0600673	0.026486	0.00996035	-0.0763255	0.090474	0.0710335	-0.0774018	0.042026	0.0456962	-0.0542264	0.0496926	-0.0953814	0.064494	0.0135122	0.0332991	-0.0812849	0.0445423	-0.103602	0.0188099	-0.0885196	-0.149478	-0.117576	0.0446123	-0.0645719	-0.123073	0.0684111	0.0651528	-0.00200739	-0.0807349	-0.0173789	0.00702014	0.0041426	-0.00558013	-0.0177291	-0.0974745	0.000283071	0.090366	0.0241972	-0.00217086	-0.0158916	-0.00634723	0.0630098	0.0887185	0.0200575	-0.0652532
69	-0.0064253	0.026477	-0.0603157	0.0265394	0.00979185	-0.0763718	0.0910917	0.0706703	-0.0773304	0.042042	0.0457777	-0.0556418	0.0492879	-0.0950684	0.0646359	0.0133192	0.0333739	-0.0809583	0.044321	-0.103959	0.0190135	-0.0890653	-0.149275	-0.117246	0.0446169	-0.064255	-0.123125	0.0688239	0.0652224	-0.00285403	-0.0805242	-0.0174258	0.00703288	0.00451988	-0.0066779	-0.0176186	-0.0967777	0.000269245	0.0903901	0.0242073	-0.0024675	-0.0162044	-0.00599827	0.0623426	0.0893553	0.0206558	-0.065571
70	-0.00626692	0.0267124	-0.0605612	0.0265922	0.00963013	-0.0764146	0.0917116	0.0703113	-0.0772621	0.0420596	0.045857	-0.0556782	0.0488786	-0.0947493	0.0647674	0.0131253	0.0334474	-0.0808708	0.0444488	-0.104309	0.0192201	-0.0894577	-0.149064	-0.116914	0.0446206	-0.0639327	-0.123173	0.0692331	0.0652863	-0.00322628	-0.0803113	-0.0174679	0.00704754	0.00497969	-0.00777884	-0.0173822	-0.0960745	0.000255605	0.0904083	0.0242209	-0.00276873	-0.0165176	-0.0056487	0.0616706	0.0899884	0.0212577	-0.0658897
71	-0.00610869	0.0268574	-0.0608038	0.0266443	0.0094751	-0.0764539	0.0923335	0.0699563	-0.0771969	0.0420786	0.0443667	-0.0557183	0.0484645	-0.0944239	0.0650962	0.0129304	0.0335195	-0.0805481	0.0442273	-0.104652	0.019426	-0.0898417	-0.148845	-0.11658	0.0446238	-0.0636044	-0.123217	0.0696387	0.065275	-0.00360399	-0.0800963	-0.0175053	0.00706443	0.00544869	-0.00888504	-0.0172975	-0.0953649	0.000242127	0.0904204	0.0242383	-0.00307454	-0.0169796	-0.00529859	0.0609937	0.0906178	0.0218631	-0.0663904
72	-0.00595071	0.0271821	-0.0610434	0.0358069	0.00932668	-0.0764898	0.0929572	0.0696057	-0.0771349	0.0420988	0.0444353	-0.0571856	0.0480457	-0.0940922	0.0652071	0.0127344	0.0335901	-0.0802273	0.0440059	-0.105074	0.0196309	-0.0902173	-0.148617	-0.116244	0.0446263	-0.0638956	-0.123258	0.0700406	0.0653269	-0.00398723	-0.0798795	-0.0175379	0.00708327	0.0059268	-0.00999542	-0.017177	-0.0944169	0.000228742	0.0904263	0.0242595	-0.00338491	-0.0173004	-0.00494804	0.0603121	0.0912436	0.0224721	-0.0667114
73	-0.00579306	0.027433	-0.0615532	0.0358962	0.00918474	-0.0765222	0.0935826	0.0692595	-0.077076	0.0421203	0.0445015	-0.0572399	0.0476221	-0.0937541	0.065307	0.0125372	0.0336591	-0.0799085	0.0437846	-0.10539	0.0198305	-0.0905844	-0.148379	-0.116087	0.0446284	-0.0635578	-0.123296	0.0704386	0.0653731	-0.00437589	-0.0796605	-0.0175656	0.00710439	0.00641397	-0.0111098	-0.0171272	-0.0936932	0.000215434	0.0904258	0.0242847	-0.0036998	-0.018167	-0.00459711	0.0596256	0.0918656	0.0230848	-0.067033
74	-0.00563583	0.0278922	-0.0617869	0.0359853	0.00904917	-0.0765513	0.0942091	0.0678384	-0.0770203	0.0421426	0.0445653	-0.0572989	0.0471937	-0.0934095	0.0653957	0.0123388	0.0337266	-0.0795916	0.0435636	-0.105714	0.0200332	-0.0909431	-0.148133	-0.115747	0.0446299	-0.0637897	-0.12333	0.0708327	0.0654434	-0.00476995	-0.0794393	-0.0175884	0.0071279	0.0069101	-0.0122281	-0.016979	-0.092963	0.000202103	0.0904187	0.0243142	-0.0040192	-0.018484	-0.00424588	0.0589343	0.0924838	0.0237012	-0.0673554
75	-0.0054791	0.0280689	-0.0616211	0.0360741	0.00891985	-0.0765771	0.0948373	0.0676425	-0.0769678	0.0421658	0.0433225	-0.0573612	0.0467603	-0.0930585	0.065473	0.0121392	0.0337922	-0.0792759	0.0433429	-0.106031	0.0202411	-0.0912931	-0.147877	-0.115406	0.0446311	-0.0632334	-0.123361	0.0712228	0.0654329	-0.00516939	-0.0792161	-0.0176063	0.00715393	0.00741513	-0.0133502	-0.0168491	-0.0922263	0.000188717	0.0904049	0.024348	-0.00520656	-0.0188177	-0.0038944	0.0582383	0.0930982	0.0243213	-0.0683854
76	-0.00552688	0.0283357	-0.0620145	0.0361628	0.00879319	-0.0765997	0.0954663	0.0673065	-0.0769185	0.0421896	0.0433761	-0.0574276	0.0463221	-0.0927008	0.0655386	0.0121267	0.045846	-0.0789628	0.0431228	-0.10634	0.0204411	-0.0916346	-0.147612	-0.115063	0.044632	-0.0628789	-0.123388	0.0716088	0.0654617	-0.00557418	-0.0789907	-0.0176191	0.00718258	0.00792898	-0.0144759	-0.0167161	-0.0914832	0.000175225	0.0903842	0.0243863	-0.00553863	-0.0191352	-0.00354272	0.0575375	0.0937087	0.0249452	-0.0690029
77	-0.00537226	0.0286078	-0.0622374	0.0362512	0.00867591	-0.0766191	0.0960967	0.0669749	-0.0768723	0.0422139	0.0434272	-0.0574934	0.0458789	-0.0923365	0.0656266	0.0119246	0.0459679	-0.0786518	0.0429034	-0.106643	0.0206395	-0.0919675	-0.147901	-0.114718	0.0446326	-0.0625885	-0.123411	0.0719907	0.0654848	-0.00598429	-0.0787632	-0.0176268	0.00721398	0.00845154	-0.015605	-0.0166652	-0.0907337	0.000161573	0.0903565	0.0244294	-0.00587512	-0.019465	-0.00319088	0.056832	0.0943153	0.0255763	-0.0693301
78	-0.00521844	0.0288851	-0.0624567	0.0363395	0.00856444	-0.0766353	0.0967279	0.0666477	-0.0768294	0.0422384	0.0434756	-0.057568	0.0454307	-0.0919654	0.0656687	0.0117209	0.0460882	-0.0783427	0.0426849	-0.106938	0.0208326	-0.0922917	-0.147619	-0.114371	0.0446331	-0.0627441	-0.12343	0.0723683	0.0653472	-0.00723985	-0.0785336	-0.0176294	0.00724825	0.00898272	-0.0167376	-0.016526	-0.0899778	0.000147703	0.0903215	0.0242589	-0.00621602	-0.0197827	-0.00283891	0.0561219	0.094918	0.0262617	-0.0696577
79	-0.00506551	0.0290183	-0.0627477	0.0364276	0.00845859	-0.0766485	0.0973598	0.0663249	-0.0767897	0.0422629	0.0435213	-0.0576487	0.0449775	-0.0915875	0.0656987	0.0115157	0.046207	-0.0780146	0.0424673	-0.107226	0.0210396	-0.0926072	-0.147327	-0.114022	0.0446337	-0.0623736	-0.123445	0.0727417	0.0653582	-0.00766431	-0.0783019	-0.0176268	0.00728549	0.00952243	-0.0178733	-0.0164267	-0.0892154	0.000133598	0.0902793	0.0243114	-0.00656125	-0.0201004	-0.00248682	0.055407	0.0955168	0.0269343	-0.0699856
80	-0.00580788	0.0293851	-0.06296	0.0365155	0.00835956	-0.0766587	0.0979921	0.0660064	-0.0767532	0.0422872	0.0435644	-0.0577316	0.0445192	-0.0912027	0.0657165	0.0113088	0.046324	-0.0777095	0.0422508	-0.107506	0.0212335	-0.092914	-0.147741	-0.113671	0.0446342	-0.0619974	-0.123456	0.0731107	0.0653636	-0.00809404	-0.078068	-0.0176189	0.00732582	0.0100706	-0.0190121	-0.0162812	-0.0884466	0.000119164	0.0902295	0.0243691	-0.00691079	-0.0204181	-0.00213464	0.0546876	0.0961115	0.0275743	-0.0703138
81	-0.00566084	0.0296781	-0.0631685	0.0366033	0.00826443	-0.076666	0.0986247	0.0645986	-0.07672	0.0423112	0.0436047	-0.0578187	0.0440558	-0.090811	0.0657218	0.0111001	0.0464393	-0.0774064	0.0420354	-0.107778	0.0214282	-0.093212	-0.147433	-0.113318	0.0446349	-0.0616146	-0.123464	0.0734753	0.0653632	-0.00852894	-0.0778319	-0.0176058	0.00736936	0.010627	-0.0201539	-0.0161323	-0.0876714	0.000104326	0.0901722	0.0241935	-0.00726457	-0.0207356	-0.00178235	0.0539635	0.0967023	0.0282312	-0.0706422
82	-0.00551501	0.0299762	-0.0634695	0.0366909	0.00817553	-0.0766704	0.0992574	0.064283	-0.07669	0.0423345	0.04402	-0.0579099	0.0435873	-0.0904122	0.0657145	0.0108896	0.0465526	-0.077461	0.0418214	-0.108043	0.0216169	-0.0935748	-0.147114	-0.112964	0.0446359	-0.0612251	-0.123467	0.0732683	0.0653572	-0.00985802	-0.077594	-0.0175874	0.0074162	0.0111917	-0.0212985	-0.0160407	-0.0868897	8.90512e-05	0.0901072	0.0244479	-0.00762255	-0.021053	-0.00143	0.0532349	0.0972891	0.0288616	-0.0709708
83	-0.00537048	0.0302796	-0.063883	0.0367784	0.00808702	-0.0776051	0.0998901	0.0639715	-0.0766633	0.042357	0.0440571	-0.0579908	0.0431135	-0.0900063	0.0656945	0.0106772	0.0466639	-0.0771629	0.0406258	-0.108299	0.0217989	-0.0938553	-0.146785	-0.112607	0.0446374	-0.0592389	-0.123466	0.0736252	0.0653456	-0.0103078	-0.0773536	-0.0175636	0.00746647	0.0117645	-0.0224458	-0.0158856	-0.0861016	7.33008e-05	0.0900342	0.0245218	-0.00798467	-0.0213814	-0.00107746	0.0525017	0.0978719	0.0295138	-0.0712995
84	-0.00522734	0.0305883	-0.0640811	0.0368657	0.0080065	-0.0776088	0.100523	0.0636643	-0.0766399	0.0423784	0.0427042	-0.0580904	0.0426346	-0.0895932	0.0656617	0.0108617	0.046773	-0.0770305	0.0404087	-0.108548	0.0219827	-0.0941269	-0.146444	-0.112249	0.0446393	-0.0593594	-0.12346	0.0739775	0.0653283	-0.0107627	-0.077111	-0.0175344	0.00752041	0.0123452	-0.0235935	-0.0157273	-0.0853071	5.69791e-05	0.0899533	0.0246015	-0.00835085	-0.0216984	-0.000724746	0.051764	0.0984506	0.0301701	-0.0716282
85	-0.00508569	0.0306335	-0.0642751	0.036953	0.00793042	-0.0776098	0.101155	0.0633611	-0.0766198	0.0423985	0.0427287	-0.0581943	0.0421504	-0.0891728	0.0656611	0.0105585	0.0468799	-0.076737	0.0401934	-0.108789	0.0221638	-0.0943896	-0.146093	-0.111889	0.0446418	-0.0589458	-0.123451	0.0743252	0.0653055	-0.0112228	-0.0768663	-0.0174998	0.00692638	0.0129337	-0.0247459	-0.0155658	-0.0843017	4.00711e-05	0.0898643	0.0246871	-0.00872104	-0.022015	-0.000371812	0.0510219	0.0990253	0.0308306	-0.0719571
86	-0.00552473	0.0309512	-0.0635236	0.0370401	0.00785857	-0.0776082	0.101786	0.0630621	-0.0766031	0.042417	0.0427504	-0.0583024	0.041661	-0.088745	0.0652153	0.0103407	0.0469846	-0.0764455	0.0399799	-0.109021	0.0223401	-0.0946434	-0.14573	-0.111527	0.044645	-0.0589943	-0.123437	0.0746683	0.0652772	-0.0119281	-0.0766197	-0.0174598	0.00698426	0.01353	-0.025899	-0.0154011	-0.0834935	2.2467e-05	0.0897671	0.0247789	-0.00909518	-0.0223312	-1.86019e-05	0.0502754	0.0995959	0.0314954	-0.0722857
87	-0.00538877	0.0312741	-0.0637057	0.0371272	0.00779072	-0.077604	0.102417	0.062767	-0.0765896	0.0424337	0.0427691	-0.0584147	0.0411662	-0.0883098	0.0651421	0.0101209	0.0470868	-0.0760865	0.0397682	-0.109245	0.0225156	-0.0948881	-0.145355	-0.111164	0.0446491	-0.0559827	-0.123418	0.0750068	0.0652434	-0.0124003	-0.0763706	-0.0174142	0.00704594	0.0142126	-0.027057	-0.0152332	-0.0826788	4.13147e-06	0.0896615	0.0248768	-0.00947317	-0.0233004	0.000334953	0.0495245	0.100163	0.0321643	-0.0726143
88	-0.0052546	0.0316021	-0.0638834	0.0372142	0.00772664	-0.0775973	0.103046	0.0624759	-0.0765794	0.0424483	0.0427848	-0.0585313	0.0406661	-0.087867	0.0650555	0.00989871	0.0471865	-0.0757987	0.0395585	-0.109461	0.022688	-0.0951238	-0.144969	-0.110798	0.0446541	-0.0555362	-0.123396	0.0753405	0.0652041	-0.0128774	-0.0761193	-0.0173631	0.0071115	0.0148243	-0.0282162	-0.0150621	-0.0818577	-1.50012e-05	0.0895476	0.0249812	-0.00985496	-0.0235841	0.000688932	0.0487692	0.100725	0.0328432	-0.0729426
89	-0.00512231	0.0319353	-0.0640567	0.0373011	0.0076661	-0.0775882	0.103675	0.0621885	-0.0765726	0.0424605	0.0427975	-0.0586521	0.0401606	-0.0874166	0.0649554	0.00967422	0.0472836	-0.0755128	0.039351	-0.109669	0.0229554	-0.0953503	-0.144571	-0.112983	0.0446602	-0.0556317	-0.123368	0.0745766	0.0651594	-0.0133594	-0.0758659	-0.0173065	0.00718106	0.0154433	-0.0293774	-0.0144174	-0.0810301	-3.49777e-05	0.0894223	0.025092	-0.0102404	-0.0239006	0.00104342	0.0480097	0.101284	0.0335208	-0.0732706
90	-0.00499198	0.0322734	-0.0643703	0.037388	0.00760886	-0.0775767	0.104303	0.0619048	-0.0765691	0.0424701	0.0428071	-0.0587771	0.0396497	-0.0869585	0.0648417	0.00944719	0.0473781	-0.0752288	0.0391458	-0.109867	0.02313	-0.0955678	-0.144194	-0.112622	0.0446675	-0.0556798	-0.123336	0.0748907	0.0651093	-0.0138462	-0.0756103	-0.0172442	0.0072547	0.0160695	-0.0305405	-0.014238	-0.080196	-5.58266e-05	0.089288	0.0252094	-0.0106296	-0.0242225	0.00139853	0.0472459	0.101838	0.0342056	-0.0735985
91	-0.00194997	0.0326167	-0.064535	0.0374749	0.007552	-0.0775628	0.104929	0.0616248	-0.076569	0.0424769	0.0428137	-0.0589063	0.0391334	-0.0865891	0.0645812	0.00921766	0.0474696	-0.0749467	0.0389429	-0.110057	0.0232928	-0.095776	-0.143813	-0.112259	0.0446762	-0.0554787	-0.1233	0.0752001	0.0697161	-0.015021	-0.0753526	-0.0171764	0.00733252	0.0167027	-0.0317054	-0.0140554	-0.0793783	-7.77027e-05	0.0891483	0.0253336	-0.0110222	-0.0245377	0.00175436	0.0464779	0.102389	0.034821	-0.073926
92	-0.00181092	0.033064	-0.064695	0.0375618	0.00750063	-0.0775467	0.105553	0.0599593	-0.0765722	0.0424805	0.0428172	-0.0590397	0.0386115	-0.0861154	0.064562	0.00894071	0.0475584	-0.0746664	0.0387425	-0.110239	0.0234521	-0.0959751	-0.143246	-0.111894	0.0446863	-0.0550071	-0.123259	0.0755046	0.0697465	-0.0151772	-0.0750927	-0.0172796	0.00693811	0.0173426	-0.0328724	-0.0138698	-0.0780892	-0.000100627	0.0889998	0.0252468	-0.0114183	-0.0248521	0.00211104	0.0457058	0.102935	0.0355114	-0.0742531
93	-0.00167394	0.033331	-0.064572	0.0376487	0.00746344	-0.0775283	0.106175	0.057784	-0.0765788	0.0424806	0.0428175	-0.0591772	0.0380843	-0.0856337	0.0644065	0.00870583	0.0476442	-0.0743879	0.0385448	-0.110411	0.0236077	-0.0961649	-0.142798	-0.111527	0.0446981	-0.0534074	-0.123213	0.0758044	0.0696571	-0.0156817	-0.0748308	-0.0173665	0.00626104	0.0179892	-0.0340406	-0.0136811	-0.0772338	-0.00012465	0.0888424	0.0253843	-0.0118178	-0.025168	0.0024687	0.0449296	0.103478	0.0362062	-0.0745798
94	-0.00153913	0.0336891	-0.0647209	0.0377357	0.00741698	-0.0775077	0.10668	0.0597148	-0.0765888	0.042477	0.0428147	-0.0593194	0.0375517	-0.085144	0.0642371	0.00846818	0.0477269	-0.0743491	0.0383499	-0.110552	0.0237562	-0.0963453	-0.142338	-0.111159	0.0447116	-0.0503978	-0.123163	0.0760994	0.0696067	-0.0161908	-0.0745667	-0.0172833	0.00634537	0.0186424	-0.0352103	-0.0134894	-0.0763718	-0.000149849	0.0886762	0.0255288	-0.0122205	-0.0268045	0.00282747	0.0414561	0.104017	0.0369055	-0.0751523
95	-0.000494115	0.034052	-0.064368	0.0378227	0.0073726	-0.077485	0.107298	0.0594473	-0.0766021	0.0424695	0.0428087	-0.0614492	0.0370135	-0.0846461	0.0641733	0.00822772	0.0478065	-0.0743496	0.0381578	-0.110707	0.023904	-0.0965165	-0.141866	-0.110788	0.0447269	-0.0504842	-0.123108	0.0763897	0.0695269	-0.0167044	-0.0743005	-0.0171945	0.00643414	0.0193018	-0.0363814	-0.0132948	-0.0755033	-0.000176276	0.088501	0.0256804	-0.0126264	-0.0271218	0.00318751	0.0406626	0.104551	0.0376093	-0.0754789
96	-0.00035987	0.0342578	-0.0645045	0.0379099	0.00732668	-0.0784542	0.107914	0.0591829	-0.0766189	0.0424577	0.0414221	-0.0616108	0.0364699	-0.0841399	0.0639759	0.00798436	0.0478829	-0.074078	0.0379687	-0.110852	0.0240477	-0.0966782	-0.14138	-0.110416	0.0447444	-0.0504931	-0.123048	0.0766753	0.069695	-0.0169503	-0.0740323	-0.0171	0.00652743	0.0199674	-0.0375538	-0.0129398	-0.0746281	-0.000204002	0.0883166	0.0256317	-0.0130353	-0.0274381	0.00354898	0.0398651	0.105082	0.0383176	-0.0758049
97	-0.00022795	0.0346952	-0.064636	0.0379972	0.00728572	-0.0784289	0.108528	0.0572959	-0.076639	0.0424414	0.040227	-0.0617764	0.0359207	-0.0836254	0.064804	0.00773803	0.0479559	-0.0738081	0.0377827	-0.110988	0.0241872	-0.0969062	-0.140881	-0.110042	0.044764	-0.0499678	-0.122983	0.0769561	0.0696308	-0.0174721	-0.0737621	-0.0169998	0.00662518	0.020639	-0.0387274	-0.0127386	-0.0737463	-0.000233077	0.0881191	0.0257973	-0.0134472	-0.0277533	0.00391199	0.0390637	0.105609	0.0390054	-0.0761303
98	-9.84185e-05	0.0350712	-0.0646195	0.0380846	0.00724151	-0.0784017	0.109139	0.055416	-0.0766625	0.0424202	0.040198	-0.0619462	0.0353659	-0.0831768	0.064839	0.00748865	0.0480256	-0.07354	0.0375999	-0.111115	0.0243224	-0.0972358	-0.140369	-0.109666	0.0447859	-0.0494338	-0.122913	0.0772322	0.0694935	-0.0179982	-0.0734898	-0.016894	0.00672773	0.0213163	-0.0399021	-0.0125346	-0.0728579	-0.000263598	0.0879166	0.0259703	-0.0138619	-0.0280673	0.00427681	0.0382584	0.106132	0.0397227	-0.0764552
99	-0.000459897	0.0355195	-0.0649436	0.0381723	0.00719615	-0.0783725	0.109747	0.0551484	-0.0766893	0.042394	0.0401655	-0.0621199	0.0348057	-0.0826457	0.0646036	0.00723618	0.0480917	-0.0732735	0.0374205	-0.111233	0.0244531	-0.09737	-0.140679	-0.109288	0.0448101	-0.0488911	-0.122838	0.0775037	0.0694194	-0.0197072	-0.0732156	-0.0167825	0.006835	0.0219992	-0.0410778	-0.0123277	-0.0719629	-0.000295614	0.087705	0.0261507	-0.0142794	-0.0293784	0.00464358	0.0374493	0.106652	0.0404445	-0.0771634
100	-0.000337516	0.0359047	-0.0650599	0.0334036	0.00718006	-0.0783415	0.110353	0.0542915	-0.0767196	0.0423623	0.0401295	-0.0622976	0.0342399	-0.0821059	0.0643538	0.00698046	0.0481544	-0.0732227	0.0372445	-0.111342	0.0245751	-0.0974946	-0.140146	-0.108908	0.0448371	-0.0491187	-0.122759	0.0777706	0.0693407	-0.0202415	-0.0729395	-0.0166654	0.00694708	0.0226875	-0.0422544	-0.0121182	-0.0710612	-0.000329193	0.0874842	0.0263385	-0.0146995	-0.0296935	0.00501249	0.0366364	0.107167	0.0411709	-0.0774885
101	-0.000217716	0.0365396	-0.0652733	0.033469	0.00714314	-0.0783086	0.110955	0.0540264	-0.0767532	0.0423251	0.0400899	-0.0624792	0.0336685	-0.0815575	0.0640898	0.00672145	0.0482134	-0.0729601	0.037072	-0.111441	0.0247013	-0.0977364	-0.1396	-0.108526	0.044867	-0.049004	-0.122674	0.0780329	0.0692574	-0.0225265	-0.0726613	-0.0165425	0.00706402	0.0233811	-0.043429	-0.0119059	-0.0701846	-0.000364401	0.0872501	0.0265339	-0.0151221	-0.0300071	0.00538372	0.0358198	0.107679	0.041902	-0.077813
102	-0.000100545	0.0369348	-0.0650272	0.0335344	0.00710463	-0.078274	0.111555	0.053763	-0.0767903	0.0422819	0.0457979	-0.0626647	0.0319606	-0.0810003	0.0639054	0.00645907	0.0482687	-0.072699	0.0369033	-0.11153	0.0248179	-0.0978421	-0.13904	-0.108143	0.0448996	-0.0484397	-0.122585	0.0782906	0.0691695	-0.0230755	-0.0723814	-0.016414	0.00718587	0.0240796	-0.0446074	-0.0117312	-0.0692697	-0.000401306	0.0870108	0.026513	-0.0155471	-0.0303193	0.00575747	0.0349995	0.108187	0.0426376	-0.0781366
103	1.39507e-05	0.0366009	-0.0651264	0.0336	0.00706837	-0.0782376	0.112151	0.0535013	-0.0768307	0.0422325	0.0471113	-0.0628538	0.0313723	-0.0804342	0.0636132	0.00619323	0.0483202	-0.0724395	0.0367383	-0.11161	0.0249254	-0.0972595	-0.138467	-0.107757	0.0449354	-0.0478665	-0.12249	0.0785438	0.0690771	-0.0236283	-0.0720996	-0.0162798	0.00731274	0.024783	-0.0457872	-0.011514	-0.0683479	-0.000439975	0.0867623	0.0275346	-0.0159744	-0.0306299	0.00613396	0.0341755	0.108692	0.0433779	-0.0784596
104	0.000125731	0.0364252	-0.0652203	0.0336656	0.00703938	-0.0781996	0.112743	0.053241	-0.0768744	0.0421766	0.0470982	-0.0630467	0.0306244	-0.0798593	0.0633065	0.00592391	0.0483678	-0.0721814	0.0365771	-0.11168	0.0250285	-0.0973432	-0.13788	-0.10737	0.0449743	-0.0458643	-0.12239	0.0787926	0.0678863	-0.0241848	-0.071816	-0.01614	0.0074446	0.025491	-0.0469674	-0.0111904	-0.0675561	-0.000480475	0.0865044	0.0277541	-0.0170383	-0.030939	0.00651339	0.0333481	0.109193	0.0441053	-0.0787817
105	8.23031e-05	0.0368249	-0.0653088	0.0337315	0.00700249	-0.0781599	0.113333	0.0529818	-0.0769216	0.042114	0.047082	-0.0632431	0.030025	-0.0792753	0.0629853	0.00565092	0.0457247	-0.0719248	0.03642	-0.111741	0.0251429	-0.0974171	-0.13728	-0.10698	0.0450167	-0.045264	-0.122285	0.079037	0.0666103	-0.0247448	-0.0715307	-0.0159945	0.00758154	0.0262034	-0.0481471	-0.0109677	-0.0666216	-0.000522879	0.0862354	0.0279811	-0.0174733	-0.0312462	0.00689597	0.0325172	0.109691	0.0448548	-0.079103
106	0.000187801	0.0372283	-0.0653919	0.0337976	0.00696576	-0.0781187	0.113918	0.0527236	-0.0769721	0.0420444	0.0470625	-0.0634395	0.02942	-0.0786822	0.0626498	0.00531085	0.0457502	-0.0716696	0.0362669	-0.111791	0.025239	-0.097481	-0.136666	-0.106588	0.0450625	-0.0446538	-0.122175	0.0792771	0.0664956	-0.0253084	-0.0712437	-0.0158045	0.00772361	0.0268281	-0.0493271	-0.0107426	-0.0656803	-0.000567246	0.0859589	0.0282156	-0.0179102	-0.0315517	0.00728193	0.0316829	0.109018	0.045609	-0.0794235
107	0.000290477	0.0376355	-0.0654695	0.0338639	0.00692628	-0.078076	0.1145	0.0524661	-0.077026	0.0419675	0.0470398	-0.0636427	0.0288096	-0.0780799	0.0622997	0.00503015	0.0457714	-0.0714158	0.0361188	-0.111832	0.0253297	-0.0975349	-0.136038	-0.106195	0.0451121	-0.0440315	-0.12206	0.0795129	0.0663764	-0.0258753	-0.0709551	-0.0156476	0.00787085	0.0275484	-0.0505076	-0.0104081	-0.0646535	-0.00061365	0.0856731	0.0292836	-0.0149462	-0.0318554	0.00767148	0.0308452	0.109506	0.0463679	-0.079743
108	-5.879e-05	0.0381749	-0.0655417	0.0339306	0.00688407	-0.0780319	0.115079	0.0505385	-0.0770832	0.0418831	0.0470138	-0.0638492	0.0281934	-0.0774684	0.0619352	0.005217	0.0457884	-0.0711633	0.0359742	-0.111853	0.0254148	-0.0975788	-0.135396	-0.105799	0.0451655	-0.0434014	-0.121939	0.0797445	0.0661838	-0.026446	-0.0706648	-0.0156902	0.0080233	0.0282725	-0.0516881	-0.010178	-0.0636979	-0.000662165	0.0853781	0.0295361	-0.01537	-0.032157	0.00806485	0.0300042	0.10999	0.0471315	-0.0800616
109	3.60222e-05	0.0385898	-0.0654722	0.0339976	0.00684529	-0.0779863	0.115653	0.0502748	-0.0771437	0.041791	0.0469845	-0.0640589	0.0275724	-0.0768475	0.0618467	0.00492995	0.0458011	-0.070912	0.035834	-0.111874	0.0254942	-0.0976126	-0.135361	-0.105401	0.0452228	-0.042761	-0.121813	0.0799719	0.0661415	-0.0270194	-0.0703734	-0.015523	0.00818099	0.0290002	-0.0528685	-0.00980068	-0.0627353	-0.000712847	0.0850737	0.029796	-0.0157952	-0.0324566	0.00846226	0.0291599	0.110472	0.0478998	-0.0803795
110	0.000127921	0.0390778	-0.0656054	0.034065	0.00681477	-0.0779394	0.116223	0.0500113	-0.0772076	0.0416909	0.046952	-0.0642755	0.0253882	-0.0762714	0.0618147	0.00463886	0.0458094	-0.0705859	0.0356982	-0.111883	0.025572	-0.0976362	-0.134696	-0.105002	0.0452977	-0.0429219	-0.121682	0.0801953	0.0660095	-0.0275959	-0.0700805	-0.0153501	0.00834397	0.0297314	-0.0540487	-0.00956569	-0.0617658	-0.000765755	0.0847601	0.0296143	-0.0162217	-0.0362605	0.00886395	0.0283125	0.11095	0.0486507	-0.0806965
111	0.000216892	0.0393149	-0.0656608	0.0341329	0.00677396	-0.0778912	0.116789	0.0497475	-0.0772748	0.0415826	0.0464396	-0.0644936	0.0247512	-0.075632	0.061259	0.00434364	0.0531991	-0.0702627	0.0355671	-0.111883	0.0256328	-0.0978286	-0.134017	-0.1046	0.0453636	-0.0427972	-0.121545	0.0778693	0.0658734	-0.0281756	-0.0697858	-0.0151715	0.00851226	0.0304657	-0.0552289	-0.00932873	-0.0607894	-0.000821	0.0844372	0.0298873	-0.0166493	-0.0380964	0.00927014	0.0274619	0.111425	0.0496647	-0.0810127
112	0.000752844	0.0397385	-0.0657554	0.0342013	0.00673194	-0.0778418	0.117351	0.0494833	-0.0773453	0.0414658	0.0463976	-0.064712	0.0241086	-0.074983	0.0608392	0.00404421	0.053242	-0.0699342	0.0354406	-0.111873	0.0256945	-0.0977529	-0.133324	-0.104196	0.0454339	-0.042133	-0.121403	0.0780746	0.0657331	-0.028758	-0.0694902	-0.0149874	0.00868588	0.0312031	-0.0564089	-0.00908987	-0.059806	-0.000878616	0.0841051	0.0301674	-0.017078	-0.038411	0.00968106	0.0266083	0.111897	0.0504479	-0.0816579
113	0.000837964	0.0399556	-0.0658002	0.0342703	0.00668863	-0.0780661	0.117908	0.0492184	-0.077419	0.0413404	0.0463521	-0.0649332	0.0234605	-0.0743245	0.0604049	0.00374024	0.0532807	-0.070091	0.0353188	-0.111853	0.02575	-0.0977459	-0.132617	-0.10379	0.0455088	-0.0421784	-0.121255	0.078276	0.0649559	-0.0311291	-0.0691931	-0.0147977	0.00886488	0.0319432	-0.0575886	-0.00884922	-0.0588155	-0.000938698	0.083767	0.0304545	-0.0175075	-0.040121	0.010097	0.0257517	0.112366	0.0512358	-0.081973
114	0.000920169	0.0403491	-0.0658394	0.03434	0.00664395	-0.0780231	0.118462	0.0489523	-0.0774961	0.0412061	0.0463032	-0.0651568	0.022807	-0.0736563	0.0604512	0.00343205	0.0533152	-0.0697994	0.0352017	-0.111822	0.0257999	-0.0977284	-0.131896	-0.103382	0.0455885	-0.041495	-0.121102	0.0784736	0.064804	-0.0317252	-0.0688945	-0.0146024	0.00904926	0.032686	-0.0587678	-0.00860686	-0.057818	-0.0010013	0.0834165	0.0307487	-0.0188335	-0.0404361	0.0105181	0.0248921	0.112832	0.0520076	-0.0822872
115	0.000999461	0.0408865	-0.0659811	0.0311702	0.00659782	-0.077979	0.11901	0.0486853	-0.0775764	0.0410628	0.0462508	-0.0653828	0.022148	-0.0729783	0.05999	0.00311942	0.0533454	-0.069496	0.0350896	-0.111781	0.0258427	-0.0977006	-0.131161	-0.102971	0.045673	-0.0408016	-0.120943	0.0786674	0.064648	-0.03426	-0.0685947	-0.0144015	0.00923904	0.0334311	-0.0599464	-0.0083629	-0.0568134	-0.0010665	0.0830568	0.0310496	-0.0192689	-0.0407651	0.0109446	0.0240296	0.113295	0.0528047	-0.0826005
116	0.00107585	0.0415454	-0.06601	0.0312244	0.00654483	-0.0779339	0.119555	0.0484168	-0.0776599	0.04091	0.046195	-0.065611	0.0244177	-0.0722905	0.0595146	0.00280219	0.0533713	-0.0692525	0.0349825	-0.111729	0.0258791	-0.0976622	-0.130412	-0.102558	0.0457626	-0.0404073	-0.120778	0.0788574	0.064488	-0.0348681	-0.0682938	-0.014195	0.00943425	0.0341784	-0.0611245	-0.00811744	-0.0558017	-0.00113437	0.082688	0.0313573	-0.0197047	-0.0410819	0.0113768	0.0231643	0.113755	0.0536064	-0.082913
117	0.00114934	0.0422707	-0.066326	0.0312793	0.00649569	-0.0778879	0.120094	0.0481466	-0.0777466	0.0407482	0.0461356	-0.065842	0.0237573	-0.0715929	0.0590249	0.00248028	0.0533927	-0.0690099	0.0348805	-0.111648	0.0259089	-0.0976132	-0.129649	-0.102144	0.0458574	-0.0396931	-0.120608	0.079044	0.0643241	-0.0354785	-0.0679917	-0.013983	0.00963489	0.0349277	-0.0623018	-0.00794752	-0.0547503	-0.00120498	0.0823101	0.0314927	-0.0201408	-0.0413902	0.0118149	0.0222962	0.114213	0.0543884	-0.0832245
118	0.00121994	0.0415755	-0.0663451	0.0313348	0.00644504	-0.077841	0.120629	0.0478744	-0.0778365	0.0405768	0.0460727	-0.0660743	0.0230915	-0.0708853	0.0585211	0.00215345	0.0534097	-0.0687681	0.0347836	-0.111575	0.0259319	-0.0975536	-0.128872	-0.101727	0.0459574	-0.0388149	-0.120431	0.079227	0.0641562	-0.0360913	-0.0676887	-0.0137653	0.00984097	0.0356788	-0.0634783	-0.00769984	-0.0537237	-0.00127841	0.0819232	0.0318127	-0.020577	-0.0417013	0.0122592	0.0214253	0.114668	0.0551992	-0.0835351
119	0.00128768	0.0425069	-0.0664827	0.0313911	0.00638939	-0.0777932	0.12116	0.0476	-0.0779295	0.0403952	0.0444609	-0.0663082	0.0224203	-0.0701678	0.0580032	0.00182187	0.0505925	-0.0684562	0.0346919	-0.111471	0.025948	-0.0974833	-0.128082	-0.101307	0.046063	-0.0371983	-0.120249	0.0794066	0.0639132	-0.0367062	-0.0673848	-0.0135422	0.0100525	0.0364314	-0.0646538	-0.00745098	-0.0526899	-0.00135473	0.0815273	0.032497	-0.0210133	-0.0420203	0.0127098	0.0205518	0.112427	0.0560147	-0.0838447
120	0.00135258	0.04307	-0.0665927	0.0314481	0.00633572	-0.0777446	0.121685	0.047323	-0.0780257	0.0402036	0.0443822	-0.0665438	0.0206369	-0.0694401	0.0574712	0.00148531	0.0505862	-0.0682158	0.0346055	-0.111353	0.0259572	-0.0974022	-0.127277	-0.100886	0.0461741	-0.0371399	-0.120061	0.0795828	0.0636835	-0.0373232	-0.0670801	-0.0134911	0.0102695	0.0371854	-0.0658283	-0.00727563	-0.0516488	-0.00143402	0.0811225	0.0328309	-0.0214493	-0.0423211	0.0131671	0.0196756	0.112874	0.0568347	-0.0841536
121	0.00141467	0.0421921	-0.0668142	0.0315061	0.00628059	-0.0776952	0.122206	0.0470432	-0.078125	0.0400019	0.0442997	-0.0667807	0.019952	-0.0687024	0.0568081	0.00114371	0.0505753	-0.0680488	0.0345244	-0.111246	0.0259593	-0.0973102	-0.126459	-0.100462	0.0462909	-0.0363785	-0.119867	0.0797559	0.0638901	-0.0389785	-0.0667747	-0.0132576	0.0104919	0.0379405	-0.0670017	-0.00707862	-0.0506004	-0.00151635	0.0807089	0.0331707	-0.0218851	-0.0426192	0.0136312	0.0187968	0.113318	0.0576592	-0.0848931
122	0.00147396	0.0426275	-0.0668144	0.031565	0.00621906	-0.0776449	0.122722	0.0467603	-0.0782274	0.0397899	0.0442135	-0.0670189	0.0192618	-0.0679545	0.0562481	0.000796608	0.0505596	-0.0678103	0.0344487	-0.111128	0.0259541	-0.0972074	-0.126144	-0.101957	0.0464136	-0.0348477	-0.119666	0.0799259	0.063824	-0.0396049	-0.0664684	-0.0143921	0.0107198	0.0386966	-0.068175	-0.00619347	-0.0495446	-0.0016018	0.0802863	0.0335164	-0.0223203	-0.0429144	0.0141024	0.0179155	0.113759	0.0584883	-0.0852021
123	0.00153051	0.0430644	-0.0668092	0.0316249	0.00615719	-0.0775939	0.123232	0.0468647	-0.0783328	0.0395675	0.0441235	-0.0688927	0.0185667	-0.0671964	0.0556742	0.000444499	0.0505392	-0.0675726	0.0343786	-0.110999	0.0259402	-0.0970936	-0.1253	-0.101543	0.0465422	-0.0349091	-0.11946	0.0800928	0.063639	-0.0402331	-0.0661616	-0.0141543	0.0109531	0.0394535	-0.0693453	-0.00593838	-0.0484815	-0.00169045	0.079855	0.0338678	-0.0227548	-0.0432069	0.0145809	0.0170317	0.114199	0.059322	-0.0855102
124	0.00107621	0.0435025	-0.0669714	0.0316859	0.00609477	-0.0775422	0.123738	0.0465761	-0.0784413	0.0393344	0.0453618	-0.0691403	0.0178664	-0.0664279	0.0550866	8.7006e-05	0.0505139	-0.0672745	0.0343138	-0.110858	0.0259101	-0.0969687	-0.124441	-0.101126	0.0466769	-0.034151	-0.119247	0.0802569	0.0634502	-0.040863	-0.0658541	-0.013911	0.0111919	0.040211	-0.0705147	-0.00568271	-0.0474108	-0.00178237	0.0794093	0.0343442	-0.0231884	-0.0434964	0.0150669	0.0161453	0.114636	0.0602536	-0.0858176
125	0.00112457	0.0439418	-0.0669568	0.031748	0.00603469	-0.0774896	0.124938	0.0462837	-0.0785527	0.0390908	0.0452726	-0.0693885	0.0171612	-0.0656492	0.0544853	-0.000276173	0.0504837	-0.0670371	0.0342553	-0.110706	0.0255997	-0.0968327	-0.123569	-0.100708	0.0468178	-0.0333391	-0.119028	0.0804181	0.0632578	-0.0414945	-0.0655461	-0.0136621	0.0114364	0.0409688	-0.0716825	-0.00542657	-0.0463327	-0.00187764	0.0789607	0.0347068	-0.0236209	-0.0437949	0.0155607	0.0133332	0.115071	0.0610967	-0.0861242
126	0.00154094	0.044287	-0.0668251	0.0318113	0.0059737	-0.0774363	0.125436	0.045987	-0.078667	0.0388363	0.0451798	-0.0696372	0.0164508	-0.06486	0.0538704	-0.000688399	0.0504486	-0.0665471	0.0342019	-0.110542	0.0255587	-0.0966856	-0.122682	-0.100287	0.046965	-0.0325145	-0.118802	0.0805766	0.0630617	-0.0421276	-0.0652378	-0.0134077	0.011686	0.0417268	-0.0728487	-0.00517012	-0.045247	-0.00197635	0.0785035	0.0350745	-0.0240522	-0.0440734	0.0160624	0.0124354	0.115504	0.0619442	-0.08643
127	0.000908847	0.0449655	-0.0668986	0.0318759	0.00591197	-0.0773822	0.125929	0.045686	-0.0787843	0.0385709	0.0450831	-0.0698862	0.0157359	-0.0640603	0.053242	-0.00106286	0.0504086	-0.0663094	0.034154	-0.110367	0.0255141	-0.0965272	-0.121782	-0.0998646	0.0471186	-0.0316775	-0.11857	0.0807324	0.0628396	-0.042762	-0.064929	-0.0131478	0.011941	0.0424848	-0.0740131	-0.00491349	-0.0441538	-0.00207857	0.0780377	0.0354472	-0.024482	-0.0443537	0.0165724	0.0115352	0.115935	0.0627962	-0.086735
128	0.00350535	0.0454081	-0.0669618	0.0319419	0.0058497	-0.0773273	0.126563	0.0453803	-0.0789044	0.0382945	0.0449828	-0.0701352	0.0150155	-0.0632502	0.0526002	-0.0014431	0.0503636	-0.0660721	0.034112	-0.110179	0.0254614	-0.0963575	-0.120869	-0.0994399	0.0472787	-0.0314865	-0.118331	0.0808858	0.0626362	-0.0433978	-0.06462	-0.0128823	0.0122013	0.0432426	-0.0751749	-0.00465682	-0.0430529	-0.00218439	0.0775635	0.0358247	-0.0249102	-0.0446308	0.0170908	0.0106327	0.116364	0.0637494	-0.0870393
129	0.00355609	0.0460271	-0.0665311	0.0320092	0.0057871	-0.0772716	0.127046	0.0450695	-0.0793806	0.038007	0.0448785	-0.070384	0.0142899	-0.0624295	0.051945	-0.00182924	0.0503136	-0.0658351	0.0340757	-0.109979	0.0254007	-0.0961764	-0.120993	-0.099013	0.0474454	-0.0306287	-0.118085	0.0810368	0.0624292	-0.0440347	-0.0643106	-0.0128182	0.0124671	0.0439999	-0.0763354	-0.00440026	-0.0419442	-0.0022939	0.0770772	0.0362069	-0.0253365	-0.047393	0.0176178	0.00972775	0.116791	0.0646108	-0.0873438
130	0.00360454	0.0464723	-0.0664892	0.0271548	0.00572105	-0.0772151	0.127524	0.0447536	-0.0795084	0.0377084	0.0447705	-0.0706324	0.0135598	-0.0615981	0.0512766	-0.00222136	0.0472302	-0.0655985	0.0340456	-0.109767	0.0253318	-0.0959839	-0.120061	-0.098584	0.0476187	-0.0281933	-0.117833	0.0811854	0.0622187	-0.0446729	-0.0640011	-0.0125424	0.0127381	0.0447567	-0.0774937	-0.00596697	-0.0408279	-0.00240717	0.0765863	0.0365936	-0.0257607	-0.0476766	0.0181536	0.0088206	0.117216	0.0654764	-0.0876467
131	0.00365078	0.0469179	-0.0664425	0.0271941	0.00565852	-0.0771576	0.127996	0.0444321	-0.0796389	0.0373983	0.0446587	-0.0708802	0.012825	-0.0607561	0.050595	-0.00261951	0.0471517	-0.065362	0.0340211	-0.109543	0.0252578	-0.0957798	-0.119116	-0.0981529	0.0477987	-0.0273012	-0.117573	0.0813319	0.0620046	-0.0453126	-0.0636915	-0.0122609	0.0130145	0.0455128	-0.0786501	-0.00572048	-0.039816	-0.00252428	0.0760832	0.0369846	-0.0261826	-0.0479509	0.0186985	0.00791117	0.11764	0.0663465	-0.0883206
132	0.00369488	0.0473637	-0.0663909	0.0272345	0.00559645	-0.0770993	0.128464	0.0441048	-0.0797721	0.0370771	0.0445431	-0.0711276	0.0120854	-0.0599034	0.0499005	-0.00302382	0.0470681	-0.0651257	0.0340025	-0.109306	0.0251722	-0.0955642	-0.118157	-0.0977197	0.0479855	-0.0263953	-0.117306	0.0814762	0.061787	-0.0459527	-0.0633818	-0.0119738	0.0132959	0.0462678	-0.0798038	-0.00547468	-0.0386844	-0.00264531	0.0755756	0.0373797	-0.026602	-0.0482277	0.0192527	0.00699948	0.118061	0.0672208	-0.0886248
133	0.00425601	0.0478096	-0.0664605	0.0272762	0.00552591	-0.0770401	0.128926	0.0437714	-0.079908	0.0367444	0.0444236	-0.0713753	0.0113408	-0.0590398	0.049193	-0.00343441	0.046979	-0.0648896	0.0339899	-0.109056	0.0250781	-0.0953369	-0.118184	-0.0972844	0.0481791	-0.0213865	-0.117033	0.0816185	0.0615659	-0.0465942	-0.0630711	-0.0116809	0.0135826	0.0470217	-0.080955	-0.00522973	-0.0375449	-0.00277033	0.0750599	0.0377789	-0.0270186	-0.0485165	0.0198162	0.00608555	0.118481	0.0680994	-0.0889284
134	0.00429918	0.0482555	-0.0664004	0.0273192	0.00546359	-0.0769798	0.129382	0.0434317	-0.0800465	0.0364004	0.0443002	-0.0716197	0.0105924	-0.0581655	0.0488026	-0.00385139	0.0468847	-0.0646535	0.0322323	-0.108793	0.0249753	-0.0950978	-0.117204	-0.096847	0.0483796	-0.0204264	-0.116751	0.0817589	0.0613412	-0.0472361	-0.0627614	-0.0113823	0.0138746	0.0477744	-0.0821036	-0.00498581	-0.0363973	-0.00289948	0.0745361	0.0381819	-0.0274322	-0.0487862	0.0203894	0.00187398	0.1189	0.0689822	-0.0892314
135	0.00434047	0.0489582	-0.0663357	0.0273636	0.00540478	-0.0769184	0.129833	0.0430855	-0.0801876	0.036045	0.0441728	-0.0718626	0.00983911	-0.0573616	0.0480072	-0.00427514	0.0467849	-0.0644173	0.0322225	-0.108518	0.0248638	-0.0948469	-0.116214	-0.0964076	0.0485662	-0.0202087	-0.116463	0.0818974	0.0611131	-0.0478786	-0.0624518	-0.0110778	0.0141718	0.0485255	-0.0832494	-0.00474307	-0.0352416	-0.0030328	0.0740043	0.0385887	-0.0278425	-0.0490674	0.0209724	0.000923836	0.119316	0.0698692	-0.0895337
136	0.00837173	0.0485687	-0.0662665	0.0274094	0.0053438	-0.0768559	0.130278	0.0427325	-0.0803311	0.035678	0.0440414	-0.0721035	0.00908144	-0.0564659	0.0472625	-0.00470507	0.0466796	-0.0641032	0.0322196	-0.108229	0.0247434	-0.0945841	-0.115211	-0.095966	0.0487804	-0.0192237	-0.116166	0.0820342	0.0608814	-0.0485219	-0.0621424	-0.0107675	0.0144741	0.049275	-0.0843926	-0.00450169	-0.0340778	-0.00317034	0.0734644	0.038999	-0.0282494	-0.0493299	0.0215653	-2.88528e-05	0.119732	0.0707605	-0.0898354
137	0.00843351	0.0492022	-0.0661929	0.0274566	0.00528901	-0.0767922	0.130718	0.0423725	-0.080477	0.0352995	0.0422942	-0.0723439	0.00831944	-0.0555593	0.0465054	-0.00514159	0.0465689	-0.0638663	0.0322217	-0.107927	0.0246561	-0.0943093	-0.114194	-0.0955224	0.0490016	-0.019131	-0.115862	0.0821693	0.0586361	-0.0491656	-0.0618331	-0.0104512	0.0147815	0.0500227	-0.0855335	-0.00426184	-0.0329057	-0.00331223	0.0729165	0.0394128	-0.0286526	-0.0495886	0.0221683	-0.000983991	0.120145	0.0715436	-0.0901367
138	0.00849403	0.0496435	-0.0664111	0.0275054	0.00523232	-0.0767272	0.131152	0.0420052	-0.0806253	0.0349094	0.0421432	-0.0725804	0.00755319	-0.0546417	0.0465468	-0.00558477	0.0464531	-0.063117	0.0322298	-0.107611	0.0245177	-0.0940225	-0.113164	-0.0950767	0.0492297	-0.018124	-0.11555	0.0823028	0.0583878	-0.0498099	-0.0615245	-0.010129	0.0150938	0.0507684	-0.0866715	-0.00402369	-0.0319479	-0.00345872	0.0723608	0.0412831	-0.0290517	-0.0498435	0.0227816	-0.000763276	0.120557	0.0724054	-0.0904376
139	0.00974287	0.0500841	-0.0664785	0.0275558	0.00518064	-0.0766608	0.13158	0.0421385	-0.0807758	0.0345078	0.0402767	-0.0747402	0.00678279	-0.0538167	0.0457686	-0.0060347	0.0463313	-0.0628764	0.0322442	-0.107282	0.0243701	-0.0937235	-0.112121	-0.094629	0.0494647	-0.0154578	-0.11523	0.0824349	0.0564627	-0.0504545	-0.0612163	-0.00980076	0.0154112	0.0515119	-0.087805	-0.00378742	-0.0308598	-0.00360962	0.0717972	0.0417108	-0.0294466	-0.0500945	0.0234054	-0.00171212	0.120968	0.0733079	-0.0907376
140	0.00936393	0.050524	-0.066395	0.0276079	0.00513418	-0.0765929	0.132003	0.0417565	-0.0809284	0.0340945	0.0401059	-0.0749826	0.00600833	-0.0528774	0.0449784	-0.00649139	0.0462039	-0.0626353	0.0322645	-0.106955	0.0242132	-0.0934123	-0.111065	-0.0941792	0.0497066	-0.0144121	-0.114902	0.0825655	0.0561968	-0.0510996	-0.0609078	-0.0094664	0.0157334	0.0522531	-0.0889349	-0.00355321	-0.0296645	-0.00376516	0.0712257	0.0421417	-0.029837	-0.0503415	0.0240397	-0.00266319	0.121378	0.0742145	-0.0910374
141	0.00942606	0.0512645	-0.0663075	0.0276616	0.00508777	-0.0765234	0.132419	0.0413665	-0.0810831	0.0336696	0.0399307	-0.0752219	0.0052299	-0.051927	0.0441763	-0.00695497	0.0460709	-0.0626702	0.0322911	-0.106597	0.0240598	-0.0929001	-0.109995	-0.0937273	0.0499553	-0.0133507	-0.114565	0.0826947	0.0559273	-0.0517449	-0.0605995	-0.00912586	0.0160605	0.0529918	-0.0900612	-0.00332123	-0.0284607	-0.00392535	0.0706465	0.0425758	-0.0302225	-0.0505984	0.0246847	-0.0036165	0.121786	0.0751252	-0.0913367
142	0.00948742	0.0517049	-0.066216	0.0277171	0.00505071	-0.0764522	0.133116	0.0409684	-0.0812398	0.0332332	0.039751	-0.0754598	0.00444836	-0.0509656	0.0433625	-0.00742546	0.0459321	-0.0624298	0.0323237	-0.106203	0.023884	-0.0925632	-0.108913	-0.0932733	0.0502109	-0.0114858	-0.114219	0.0828227	0.055654	-0.0544404	-0.0602917	-0.00877907	0.0163924	0.0537278	-0.0911837	-0.00309167	-0.0270628	-0.0040903	0.0700595	0.0430129	-0.030603	-0.0508504	0.0253405	-0.00457203	0.122192	0.0760398	-0.0916355
143	0.00954812	0.0521102	-0.066197	0.0277744	0.00501868	-0.0763791	0.133522	0.03984	-0.0813984	0.0327851	0.0395666	-0.0756921	0.00667191	-0.0500169	0.0425372	-0.00790292	0.0457877	-0.0621888	0.0323625	-0.105816	0.0236985	-0.0922139	-0.107817	-0.0928173	0.0504732	-0.010388	-0.113865	0.0829495	0.055377	-0.0550968	-0.0599841	-0.00842595	0.016729	0.054461	-0.0923023	-0.00286471	-0.0258402	-0.00426011	0.0694648	0.043453	-0.0309781	-0.0510983	0.0260072	-0.00552974	0.122598	0.0769583	-0.0919338
144	0.0096083	0.052411	-0.0663832	0.0278336	0.00498725	-0.076304	0.133921	0.0394245	-0.0815588	0.0323253	0.035835	-0.0759205	0.00589259	-0.0490331	0.0427242	-0.00838738	0.0456375	-0.0624283	0.0324074	-0.105415	0.0235033	-0.0918519	-0.106707	-0.0923593	0.0507422	-0.0092741	-0.113501	0.0830751	0.0551007	-0.0557535	-0.059677	-0.00806644	0.0170703	0.0551912	-0.0934175	-0.00264054	-0.0246088	-0.00443491	0.0688625	0.0438959	-0.0313476	-0.0513289	0.0266849	-0.00648972	0.123002	0.077932	-0.0922315
145	0.00966808	0.0528465	-0.0662827	0.0278948	0.00496391	-0.0762268	0.134315	0.0390002	-0.0817208	0.031854	0.0356226	-0.0761446	0.00510972	-0.0480382	0.0415247	-0.00887889	0.0454816	-0.06225	0.0324584	-0.104998	0.0233091	-0.0914772	-0.105585	-0.0918991	0.0510177	-0.00478021	-0.113129	0.0831995	0.0547752	-0.0564104	-0.0593701	-0.00770044	0.0174161	0.0559183	-0.0945278	-0.00241934	-0.0233684	-0.00461466	0.0682525	0.0443417	-0.0317111	-0.0515759	0.0273737	-0.0074519	0.123404	0.0788586	-0.0925287
146	0.0100023	0.0532805	-0.0664467	0.0279579	0.00494203	-0.0761474	0.134702	0.038567	-0.0818843	0.031371	0.0354053	-0.0763642	0.00432341	-0.0470321	0.0406704	-0.00937743	0.0453199	-0.06201	0.0325157	-0.104567	0.0230941	-0.0910898	-0.104449	-0.0914369	0.0512996	-0.00361592	-0.112747	0.083323	0.0544367	-0.0570674	-0.0590637	-0.00732788	0.0177665	0.056642	-0.0956336	-0.00231426	-0.022119	-0.0047995	0.0676349	0.0447903	-0.0320685	-0.051798	0.0280737	-0.00841632	0.123806	0.0797312	-0.0928254
147	0.0100635	0.0537129	-0.0663409	0.028023	0.00495526	-0.0760655	0.135082	0.0381248	-0.0820493	0.0308765	0.0351829	-0.076579	0.00353378	-0.0460148	0.0398051	-0.00988311	0.0451523	-0.0617688	0.0325789	-0.104119	0.0228691	-0.0906894	-0.103299	-0.0909726	0.051588	-0.0025372	-0.112355	0.0820588	0.0541442	-0.0577246	-0.0587577	-0.00694867	0.0181213	0.0573624	-0.0967348	-0.00210035	-0.0208605	-0.00498951	0.0670097	0.0452417	-0.0324192	-0.0520156	0.0287849	-0.00938291	0.124206	0.0806653	-0.0931216
148	0.0101247	0.0541435	-0.0663802	0.0280903	0.00495196	-0.0759811	0.135457	0.0516933	-0.0822155	0.0303705	0.0349555	-0.0767886	0.00274093	-0.0449863	0.0384986	-0.0103959	0.0449789	-0.0615264	0.0326484	-0.103656	0.0226338	-0.0902761	-0.102134	-0.0905062	0.0518824	-0.00134018	-0.111953	0.0821727	0.0538479	-0.0583819	-0.058452	-0.00656272	0.0184805	0.0580791	-0.0978313	-0.00188998	-0.0195929	-0.00518476	0.0663745	0.0456958	-0.0327632	-0.0522288	0.0295074	-0.0103518	0.124605	0.0816031	-0.0934173
149	0.0101861	0.0545722	-0.0661711	0.0204225	0.00496205	-0.0758939	0.135824	0.0531793	-0.0823829	0.0298528	0.0347231	-0.0769927	0.00194497	-0.0439467	0.0376102	-0.0109159	0.0447994	-0.0611855	0.0327242	-0.103177	0.0223883	-0.0898496	-0.100958	-0.0900376	0.0521829	-0.000125988	-0.111541	0.0822856	0.0521502	-0.0590393	-0.0581466	-0.00616994	0.018844	0.058792	-0.0989227	-0.00168334	-0.0183159	-0.00538532	0.0657342	0.0461526	-0.0331	-0.0524504	0.0302412	-0.0113229	0.125003	0.0825447	-0.0939521
150	0.0102478	0.0549989	-0.0660561	0.0204372	0.00497528	-0.0758037	0.136185	0.0527652	-0.0825513	0.0293236	0.0321225	-0.0771922	0.00114557	-0.042896	0.0367113	-0.011443	0.044614	-0.0609395	0.0328066	-0.102682	0.0221324	-0.0894099	-0.0997676	-0.0895669	0.0524893	0.000351056	-0.111119	0.0823975	0.0518377	-0.0596967	-0.0578416	-0.00577025	0.0192117	0.0595011	-0.10001	-0.00148061	-0.0170295	-0.00559128	0.0650863	0.0466121	-0.0352365	-0.0526658	0.0309863	-0.0122962	0.125399	0.0834899	-0.0942471
151	0.01031	0.0554235	-0.065938	0.0204533	0.0050043	-0.0757105	0.136539	0.0523416	-0.0827206	0.0287829	0.0318616	-0.0773844	0.000344409	-0.0418341	0.0356476	-0.0119772	0.0444226	-0.0606919	0.0328947	-0.10217	0.0218661	-0.0889106	-0.0985638	-0.0890939	0.0528013	0.00159294	-0.110686	0.0825084	0.0515211	-0.060354	-0.0575369	-0.00536354	0.0195834	0.060206	-0.101091	-0.00128198	-0.0155904	-0.00580269	0.0644309	0.0470743	-0.0355691	-0.0528652	0.0317428	-0.0132718	0.125794	0.0844387	-0.0945412
152	0.0103727	0.0558459	-0.0658171	0.020471	0.00503985	-0.0756139	0.136886	0.0519085	-0.0828906	0.0282305	0.031595	-0.0775703	-0.000460187	-0.0408733	0.0346836	-0.0125186	0.044225	-0.0604426	0.032989	-0.101641	0.021245	-0.0884439	-0.0973463	-0.0886187	0.0531187	0.0028524	-0.110242	0.0826184	0.0512005	-0.0610112	-0.0572325	-0.00494973	0.0199593	0.0609066	-0.102167	-0.00108763	-0.0143587	-0.00601964	0.063768	0.0471877	-0.0358938	-0.0530598	0.0325106	-0.0142497	0.126188	0.0853911	-0.0948349
153	0.0104362	0.0562659	-0.0656932	0.0204903	0.00509039	-0.0755138	0.137226	0.0494629	-0.0830611	0.0276667	0.0313228	-0.0777493	-0.00126743	-0.03979	0.0334382	-0.0130671	0.0440213	-0.0601912	0.0330895	-0.101096	0.0209493	-0.0879636	-0.0961148	-0.0881412	0.0534414	0.00710174	-0.109786	0.0827274	0.0508758	-0.0616684	-0.0569284	-0.00452871	0.0203391	0.0615152	-0.103237	-0.000897764	-0.0130866	-0.00624217	0.0630976	0.0476533	-0.0362101	-0.0532496	0.0332897	-0.0152297	0.12658	0.0863471	-0.0951276
154	0.0105006	0.0566833	-0.0655667	0.0205113	0.0051527	-0.07541	0.137299	0.0490082	-0.083232	0.0270914	0.0310447	-0.0779213	-0.0020772	-0.0386957	0.0324963	-0.0136227	0.0438115	-0.0599377	0.0312239	-0.100532	0.0206597	-0.0874695	-0.0948694	-0.0876614	0.0537691	0.00841604	-0.109319	0.0828355	0.0505469	-0.0623255	-0.0566244	-0.0041004	0.0207228	0.0622064	-0.104301	-0.000712557	-0.0117615	-0.00647036	0.0624182	0.0481216	-0.0365178	-0.0534345	0.0340802	-0.0162122	0.126972	0.0873359	-0.0954197
155	0.0105661	0.0575073	-0.0654375	0.0205339	0.00522745	-0.0753022	0.137622	0.0485437	-0.0834032	0.0265045	0.0307606	-0.0780909	-0.00288939	-0.0375905	0.0315446	-0.0141853	0.0404679	-0.059682	0.0313258	-0.0999516	0.0203482	-0.0869617	-0.0936099	-0.0871792	0.0541016	0.00974797	-0.10884	0.0829426	0.0505263	-0.0629823	-0.0563206	-0.00366468	0.0211103	0.0628929	-0.105358	-0.000532197	-0.0104267	-0.00670424	0.0617326	0.0485926	-0.0368166	-0.0536184	0.0348819	-0.0171968	0.127361	0.0883486	-0.0962052
156	0.0106328	0.0574578	-0.0653058	0.0205584	0.0053153	-0.0751903	0.137939	0.0489578	-0.0835743	0.025906	0.0304707	-0.0782477	-0.00370386	-0.0364745	0.0304654	-0.014755	0.0402243	-0.0594237	0.0314337	-0.0993529	0.0200257	-0.0864399	-0.0923362	-0.0886509	0.0544384	0.0131381	-0.108348	0.0830487	0.0501295	-0.0636392	-0.056017	-0.00322147	0.0215015	0.0635746	-0.10641	-0.000356869	-0.00914089	-0.00694391	0.0610396	0.0490663	-0.0371061	-0.0537933	0.0356949	-0.0181837	0.12775	0.0893152	-0.0964971
157	0.0107008	0.0578664	-0.0655224	0.0205846	0.00541693	-0.075074	0.138247	0.0484752	-0.0837453	0.0252961	0.0301746	-0.0783964	-0.0045205	-0.0353477	0.0294941	-0.0153317	0.0399741	-0.0591628	0.0315479	-0.0987359	0.0202109	-0.0859039	-0.0910481	-0.088178	0.0547794	0.0135688	-0.107844	0.0831538	0.0496955	-0.0642958	-0.0557133	-0.00277064	0.0218962	0.0642512	-0.107454	-0.000186754	-0.00778649	-0.00718939	0.0603391	0.0495428	-0.037386	-0.0539631	0.0365189	-0.0191728	0.124442	0.0902852	-0.096788
158	0.0107704	0.0582719	-0.0653881	0.0206128	0.00553239	-0.0749531	0.139289	0.0479826	-0.0839159	0.0246747	0.0298724	-0.0785389	-0.00533919	-0.0342103	0.0285134	-0.0159154	0.0397174	-0.058899	0.0316674	-0.0981003	0.0198647	-0.0853537	-0.0897455	-0.0877027	0.0551239	0.0149679	-0.107327	0.0832579	0.0493502	-0.0649522	-0.0554097	-0.00231211	0.0222945	0.0649226	-0.108493	-2.20356e-05	-0.00642211	-0.00744076	0.0596308	0.050022	-0.037656	-0.0541277	0.037354	-0.0201642	0.124799	0.0912584	-0.0970778
159	0.0108417	0.0586743	-0.0652515	0.0206429	0.00566404	-0.0748273	0.139586	0.0474798	-0.0840859	0.0240419	0.0295639	-0.0813641	-0.0061598	-0.0330624	0.0290371	-0.0165059	0.0394543	-0.0578749	0.0317934	-0.0974889	0.0195117	-0.0847891	-0.0884283	-0.0872251	0.0554723	0.0163861	-0.106796	0.0833608	0.0490005	-0.0656092	-0.055106	-0.00184575	0.0226961	0.0655885	-0.109524	-7.34142e-06	-0.00504768	-0.00769799	0.0589152	0.0505039	-0.0379157	-0.0542871	0.0381999	-0.0211579	0.125154	0.0922348	-0.0973664
160	0.0109148	0.0590734	-0.0651128	0.0206751	0.00581103	-0.0746964	0.139875	0.0469668	-0.0842551	0.0233974	0.0292489	-0.0815008	-0.00698222	-0.0319042	0.028045	-0.0171032	0.0391843	-0.0579593	0.0319253	-0.0968157	0.0191436	-0.0842099	-0.0870962	-0.0867449	0.0558046	0.0168272	-0.106251	0.0834625	0.0485423	-0.066265	-0.0548012	-0.00137147	0.023101	0.0662489	-0.110547	7.87782e-06	-0.00364711	-0.00796119	0.0581902	0.0509886	-0.0381649	-0.0544411	0.0390565	-0.0221539	0.125507	0.0932144	-0.0971851
161	0.0109899	0.0594689	-0.0649719	0.0207094	0.00596453	-0.0745601	0.140155	0.0464437	-0.0844232	0.0227413	0.0289274	-0.081628	-0.00780632	-0.0307356	0.0270439	-0.0177072	0.0389078	-0.0576821	0.0320631	-0.096123	0.0187657	-0.083616	-0.0857492	-0.086262	0.0561588	0.0174563	-0.105692	0.083563	0.048074	-0.0669206	-0.0544971	-0.000889138	0.0235092	0.0669036	-0.111564	0.000153412	-0.00225215	-0.0082304	0.0574595	0.0514761	-0.038403	-0.0545897	0.0399238	-0.0231521	0.125857	0.0941971	-0.0974696
162	0.0110673	0.0598609	-0.0649997	0.0207458	0.00615109	-0.0694317	0.140428	0.0459104	-0.08459	0.0220738	0.0285993	-0.0817455	-0.00863198	-0.029557	0.0260339	-0.0183376	0.0386245	-0.057401	0.0322069	-0.0954097	0.0183781	-0.0830071	-0.0843869	-0.0857765	0.0565153	0.0189225	-0.105118	0.0836622	0.0482073	-0.0675756	-0.0541927	-0.000716834	0.0239204	0.0675523	-0.112572	0.000292819	-0.000847029	-0.00850562	0.0567212	0.0519663	-0.0386299	-0.0547567	0.0408017	-0.0241525	0.126205	0.0952028	-0.0977527
163	0.0111469	0.0602491	-0.0648563	0.0207846	0.00634478	-0.0692591	0.140691	0.0453669	-0.0847552	0.0213945	0.0268983	-0.0818529	-0.00945906	-0.0283684	0.0250153	-0.0189548	0.0383344	-0.0569686	0.0323565	-0.0946771	0.0179789	-0.0823833	-0.0830093	-0.085288	0.0568738	0.0204084	-0.104528	0.0837599	0.047922	-0.0682305	-0.0538879	-0.000219974	0.0243346	0.0681948	-0.113575	0.000425928	0.000568272	-0.0087869	0.0559752	0.0524592	-0.0388452	-0.0548689	0.0416898	-0.0251552	0.12655	0.0961916	-0.0980341
164	0.0112291	0.0606333	-0.0647111	0.0208257	0.00655578	-0.0690804	0.140946	0.0436938	-0.0849186	0.0207034	0.0265479	-0.0819499	-0.0096696	-0.0271702	0.023988	-0.0195785	0.0380375	-0.0569325	0.0325121	-0.093924	0.0175791	-0.0817442	-0.0816162	-0.0847966	0.0572339	0.0219142	-0.103923	0.0838561	0.0476148	-0.0688849	-0.0535826	-4.03962e-05	0.0247518	0.0688311	-0.114568	0.000552572	0.00199377	-0.00907423	0.0552215	0.0529548	-0.0390485	-0.0550007	0.042588	-0.0261601	0.126892	0.0971833	-0.0983137
165	0.0113139	0.0610751	-0.0647751	0.0208692	0.00679129	-0.0688952	0.141191	0.0431242	-0.0850799	0.0200006	0.0261904	-0.082036	-0.0104966	-0.0259624	0.0229523	-0.0202085	0.0377335	-0.0573061	0.0326735	-0.0931503	0.0171562	-0.0812524	-0.0802073	-0.0843019	0.057595	0.0234397	-0.103302	0.0839506	0.0472402	-0.0695389	-0.0532766	0.000471466	0.0251717	0.0694608	-0.115552	0.000553617	0.00342947	-0.00936765	0.0544602	0.0534531	-0.0392395	-0.0551266	0.0434962	-0.0271672	0.127232	0.0981293	-0.0985913
166	0.0114016	0.0613411	-0.0638282	0.0209153	0.00707468	-0.0687033	0.141427	0.0425448	-0.0852388	0.0192861	0.0258258	-0.0821128	-0.0113247	-0.0247452	0.0219082	-0.0209327	0.0374225	-0.0570137	0.0328407	-0.0923555	0.0167169	-0.0807477	-0.0787823	-0.083804	0.0579568	0.0249858	-0.102663	0.0840433	0.0468605	-0.0701923	-0.0529699	0.000991939	0.0255943	0.0704898	-0.116527	0.000665974	0.00487538	-0.00966716	0.0536913	0.053954	-0.0394178	-0.0552467	0.0444142	-0.0281764	0.127568	0.099126	-0.0988675
167	0.0114923	0.0617118	-0.0639674	0.020964	0.00734667	-0.0685045	0.141654	0.0419555	-0.0853948	0.0185598	0.0254539	-0.0821762	-0.0121536	-0.023519	0.0208558	-0.0215754	0.0343854	-0.0567003	0.0330135	-0.0915393	0.01627	-0.0800624	-0.0773411	-0.0833025	0.0583187	0.0261169	-0.102008	0.084134	0.0464038	-0.0708453	-0.0526628	0.00152115	0.0260195	0.0711079	-0.117494	0.00077137	0.00633147	-0.00997276	0.0529145	0.0544575	-0.0395832	-0.0553608	0.0453416	-0.0291877	0.127902	0.100125	-0.0991407
168	0.0115861	0.0620778	-0.0638128	0.0210154	0.00764252	-0.0682985	0.14187	0.0413563	-0.0855479	0.0178215	0.0250746	-0.0822277	-0.0129834	-0.022284	0.0199311	-0.022224	0.0340373	-0.056397	0.0331923	-0.0907287	0.015811	-0.0793611	-0.0758835	-0.0827974	0.0586802	0.0276998	-0.101334	0.0798352	0.0460131	-0.0714976	-0.0523543	0.00205924	0.0264483	0.0717189	-0.118451	0.000869652	0.00779772	-0.0102845	0.0521301	0.0549633	-0.0397352	-0.0554816	0.0462782	-0.0302012	0.128232	0.101127	-0.0994117
169	0.0116832	0.062439	-0.0636566	0.0210697	0.00795951	-0.0680851	0.142077	0.0407474	-0.0856974	0.0170713	0.0246878	-0.082267	-0.0138138	-0.0210404	0.0188634	-0.0229838	0.0336816	-0.056088	0.0333768	-0.089869	0.0153398	-0.0786436	-0.0744091	-0.0822883	0.0590409	0.0293039	-0.100642	0.0798961	0.0455252	-0.0721494	-0.0520446	0.00260632	0.0268787	0.0723224	-0.119399	0.000960667	0.0092741	-0.0106022	0.0513379	0.0552415	-0.0398736	-0.0555834	0.0472239	-0.0312167	0.128558	0.102131	-0.09968
170	0.0117839	0.0627951	-0.0632272	0.021127	0.00829813	-0.0678639	0.142274	0.0401288	-0.0858432	0.0163091	0.0242934	-0.0822936	-0.0146448	-0.0197885	0.0177878	-0.0236442	0.0333185	-0.0557729	0.0335673	-0.088987	0.0148562	-0.0779099	-0.0729176	-0.0817752	0.0594001	0.0309286	-0.0999314	0.0799542	0.0451231	-0.0728004	-0.0517337	0.00316255	0.0273111	0.0736671	-0.120337	0.00104427	0.0107606	-0.0109261	0.050538	0.0557502	-0.0399979	-0.0556788	0.0481782	-0.030347	0.128881	0.103138	-0.0999456
171	0.0118882	0.0631459	-0.0631129	0.0211874	0.00865881	-0.068307	0.142459	0.0395006	-0.0859848	0.0155347	0.0215194	-0.0823072	-0.0154764	-0.0185287	0.016501	-0.0243101	0.0329476	-0.0554513	0.0337631	-0.0880823	0.0143612	-0.0774151	-0.071409	-0.0812578	0.0597573	0.0325742	-0.0992007	0.0800094	0.0447153	-0.0734505	-0.0514214	0.00372804	0.0277457	0.0742599	-0.121266	0.00112031	0.0122571	-0.011256	0.0497301	0.0562609	-0.0401079	-0.0557678	0.0491409	-0.0313618	0.129199	0.104146	-0.100208
172	0.0170763	0.0632801	-0.0629507	0.021251	0.00904198	-0.068073	0.142634	0.0388629	-0.0861218	0.0147479	0.0210915	-0.0823074	-0.016308	-0.0173861	0.0154093	-0.0249812	0.032569	-0.055123	0.0339642	-0.0871547	0.0138527	-0.0769606	-0.0698827	-0.0807358	0.060112	0.0342407	-0.0984496	0.0800613	0.0443018	-0.0741	-0.0511075	0.00430295	0.0281824	0.0748447	-0.122184	0.00118865	0.0137635	-0.0115919	0.0489145	0.0565215	-0.0402032	-0.0558501	0.0501117	-0.0323783	0.129514	0.105157	-0.100468
173	0.0205568	0.0636183	-0.0627871	0.0213179	0.00944802	-0.0678305	0.142798	0.0382159	-0.0862538	0.013949	0.0206555	-0.0822939	-0.0171399	-0.0161119	0.01431	-0.0256574	0.0321824	-0.0555073	0.0341711	-0.0862038	0.013325	-0.0765062	-0.0683386	-0.080209	0.0604635	0.0359282	-0.0976775	0.0801098	0.0438823	-0.0766656	-0.0507919	0.00488741	0.0286211	0.0753025	-0.123091	0.00124916	0.0152798	-0.0119338	0.048091	0.0570341	-0.0402834	-0.0572666	0.0510902	-0.0333964	0.129824	0.106169	-0.100723
174	0.020741	0.0642334	-0.0626221	0.0213884	0.00987728	-0.0675793	0.14295	0.0375598	-0.0863803	0.0131376	0.0181926	-0.0822622	-0.0179717	-0.0148307	0.0132033	-0.0263386	0.0317878	-0.0551677	0.0343834	-0.0852293	0.0127872	-0.0757102	-0.0667764	-0.0796772	0.0608113	0.0379524	-0.0968838	0.0801547	0.0434568	-0.0773249	-0.0504744	0.00548155	0.0290617	0.075869	-0.123988	0.0013017	0.0168059	-0.0122817	0.0472596	0.0571463	-0.0403483	-0.0573396	0.0520762	-0.0344159	0.130129	0.107407	-0.100976
175	0.0209306	0.0640378	-0.0624559	0.0214625	0.0103234	-0.0673193	0.143091	0.0368946	-0.0865008	0.0123135	0.0177237	-0.0822201	-0.0188039	-0.0135428	0.011855	-0.0270242	0.0313851	-0.0548238	0.0346014	-0.084231	0.0122372	-0.0748971	-0.0651956	-0.07914	0.0611548	0.0396808	-0.0960678	0.0801955	0.043025	-0.0779833	-0.0501548	0.00608553	0.0295042	0.0764265	-0.124876	0.00134614	0.0183417	-0.0126354	0.0464204	0.0576582	-0.0403974	-0.0574057	0.0530691	-0.0354368	0.13043	0.108424	-0.101224
176	0.0211258	0.0642042	-0.0625934	0.0215404	0.010795	-0.0670501	0.143219	0.0362205	-0.086615	0.0114769	0.0172462	-0.0821632	-0.0196354	-0.0122488	0.0107317	-0.0277144	0.0309742	-0.0541766	0.0348247	-0.0832085	0.0116953	-0.0740666	-0.0635961	-0.0785973	0.0614756	0.0414302	-0.0952288	0.0802322	0.0425869	-0.0786406	-0.049833	0.00669947	0.0299483	0.0769749	-0.12575	0.00160167	0.0197155	-0.012995	0.0455732	0.0581711	-0.0404305	-0.0574646	0.0540687	-0.0364589	0.130725	0.109443	-0.101468
177	0.0213268	0.0655345	-0.062427	0.0216223	0.0112956	-0.0667717	0.143335	0.0355376	-0.0867222	0.0106277	0.0167599	-0.0820937	-0.0204666	-0.0109489	0.00960116	-0.0284085	0.0305551	-0.0538135	0.0350535	-0.0821616	0.0111232	-0.0732185	-0.0619775	-0.0780487	0.0618084	0.0431999	-0.094366	0.0802642	0.0420089	-0.0798475	-0.0495088	0.00732352	0.0303941	0.0775137	-0.126613	0.00152391	0.0210445	-0.0133604	0.0447182	0.0586847	-0.0404471	-0.0575162	0.0550746	-0.0374821	0.131015	0.110423	-0.101707
178	0.0215338	0.0658473	-0.0622593	0.0217083	0.0118203	-0.0664836	0.143438	0.0348462	-0.0868219	0.00976551	0.0162648	-0.082006	-0.0212973	-0.00964369	0.00846354	-0.0292273	0.0301281	-0.05341	0.0352875	-0.08109	0.0105324	-0.0723527	-0.0603395	-0.0774939	0.062135	0.0449904	-0.0934789	0.0802914	0.0414202	-0.0805063	-0.049182	0.00795782	0.0308414	0.0780427	-0.127464	0.0013073	0.0226052	-0.0137315	0.0438552	0.0591986	-0.0404471	-0.0575602	0.0560862	-0.0385062	0.1313	0.111444	-0.101942
179	0.0217469	0.0663448	-0.0622321	0.0217987	0.0123693	-0.0661858	0.143527	0.0341464	-0.0869136	0.00889039	0.0157608	-0.0819024	-0.0221274	-0.0083335	0.00692369	-0.0299299	0.0296921	-0.0530279	0.0355268	-0.0799934	0.00993424	-0.0714691	-0.0586816	-0.0769325	0.0624548	0.0456023	-0.0925665	0.0803134	0.0409598	-0.0811637	-0.0488523	0.00698671	0.0312901	0.0785615	-0.128303	0.00131718	0.024175	-0.0141083	0.0429843	0.0597125	-0.0404301	-0.0575966	0.0568368	-0.0395311	0.131578	0.112466	-0.102171
180	0.0219663	0.0666452	-0.0620628	0.0218936	0.012932	-0.0658781	0.143603	0.0334384	-0.0840188	0.00800218	0.0107962	-0.0817825	-0.0229568	-0.00713053	0.00636873	-0.0306358	0.0292474	-0.0526359	0.0357713	-0.0788716	0.00932304	-0.0705675	-0.0570036	-0.0763643	0.062767	0.0570025	-0.0916283	0.0803299	0.0404923	-0.0818197	-0.0485202	0.00763352	0.0317402	0.0790698	-0.12913	0.00131837	0.0257537	-0.0144906	0.0421054	0.0602261	-0.0403957	-0.057625	0.0578568	-0.0405566	0.131849	0.113436	-0.102396
181	0.0221923	0.0635753	-0.062108	0.0219932	0.0135298	-0.0655603	0.143664	0.0327223	-0.0840686	0.00710077	0.0102416	-0.0816479	-0.0228837	-0.00581238	0.00521107	-0.031345	0.0287939	-0.0522335	0.036021	-0.0777057	0.00869869	-0.0696477	-0.0553052	-0.0796657	0.063071	0.0589139	-0.0906635	0.0803404	0.0400175	-0.0824741	-0.0481842	0.00764344	0.0321916	0.0795672	-0.129944	0.00117426	0.0279629	-0.0148784	0.0412187	0.0607389	-0.0403436	-0.0576433	0.0588813	-0.0415826	0.132114	0.114457	-0.102614
182	0.0224249	0.0638303	-0.0620133	0.0220977	0.0141521	-0.0652321	0.143711	0.0295342	-0.0841082	0.00618603	0.00967764	-0.0814944	-0.0237097	-0.00449069	0.00598886	-0.0320571	0.0283316	-0.0518202	0.0362757	-0.0765326	0.00806113	-0.0685284	-0.0535858	-0.0791046	0.0633663	0.0608465	-0.0896712	0.0803446	0.0415823	-0.0831267	-0.0478447	0.00830719	0.0326442	0.0800534	-0.130746	0.00130907	0.029359	-0.0152716	0.0403241	0.0612506	-0.0402735	-0.0576554	0.0599097	-0.0426088	0.132372	0.115601	-0.102827
183	0.0226644	0.0640767	-0.0617844	0.0222073	0.0147987	-0.0648936	0.143743	0.0287967	-0.0841371	0.00525777	0.0091041	-0.0813234	-0.0245338	-0.00316598	0.00433677	-0.0327718	0.0278603	-0.0514768	0.0365351	-0.0753336	0.00743071	-0.0675708	-0.051689	-0.0785356	0.063652	0.0628004	-0.0886509	0.0803421	0.0411082	-0.0837774	-0.0475014	0.00898178	0.0330979	0.0805279	-0.131534	0.0012837	0.0309666	-0.01567	0.0394215	0.0617605	-0.0401851	-0.0576589	0.0609415	-0.0436349	0.132622	0.116624	-0.103034
184	0.0222829	0.0643142	-0.0616114	0.0223223	0.0154728	-0.0645444	0.14376	0.0360035	-0.0841546	0.00431605	0.00852089	-0.0811348	-0.0253583	-0.00183878	0.0025702	-0.0334888	0.02738	-0.0510411	0.0367997	-0.0741084	0.00679987	-0.0665947	-0.0499242	-0.0779584	0.0639275	0.0650782	-0.0876017	0.0803324	0.0406263	-0.0844258	-0.0471531	0.00966736	0.0335526	0.0809902	-0.132309	-0.00111456	0.0325821	-0.0160736	0.038508	0.0622683	-0.0400782	-0.0576537	0.0619763	-0.0446609	0.132864	0.117647	-0.103233
185	0.0225308	0.0645744	-0.0615862	0.0224429	0.0161679	-0.0641845	0.14376	0.0352728	-0.0841601	0.00336051	0.00792804	-0.0846589	-0.0261806	-0.000509611	0.00122474	-0.0342079	0.0268904	-0.0504734	0.0370691	-0.072857	0.00612263	-0.0656002	-0.0481373	-0.0773724	0.0641921	0.0652803	-0.0865229	0.0803152	0.0401365	-0.0850718	-0.0468017	0.010364	0.0340083	0.0812709	-0.13307	-0.00117749	0.0342055	-0.0164822	0.0375897	0.0627734	-0.0399524	-0.0576619	0.0630133	-0.0456864	0.133098	0.118646	-0.103426
186	0.022786	0.0647932	-0.0614111	0.0225693	0.0168869	-0.0638137	0.143744	0.0326433	-0.0841526	0.00239137	0.00732547	-0.0844526	-0.0270013	0.000820967	-0.000423124	-0.0349287	0.0263915	-0.0500115	0.0373432	-0.0715791	0.00543202	-0.0645872	-0.0463279	-0.0808392	0.0644453	0.0672859	-0.0854137	0.08029	0.0396385	-0.0857154	-0.0464458	0.0110719	0.0344649	0.0817069	-0.133817	-0.00124997	0.0358362	-0.0168958	0.0366632	0.0632752	-0.0398074	-0.0576387	0.0640521	-0.0467111	0.133322	0.119667	-0.103611
187	0.0230486	0.0650021	-0.0614032	0.0227019	0.0176296	-0.063432	0.14371	0.031894	-0.0841314	0.0014091	0.00671308	-0.0842313	-0.0278203	0.00215239	-0.00161952	-0.0356508	0.0258832	-0.0495363	0.0376219	-0.0702746	0.00472801	-0.0635558	-0.0444957	-0.0802618	0.0646863	0.0693118	-0.0842735	0.0802562	0.0389443	-0.086356	-0.0460851	0.0124041	0.0349222	0.0821296	-0.13455	-0.00133208	0.037474	-0.0173141	0.0357292	0.0637731	-0.0396429	-0.057606	0.0648242	-0.0477348	0.133538	0.120687	-0.103789
188	0.0233189	0.0652008	-0.0614265	0.0228407	0.0183957	-0.0636987	0.143867	0.0311383	-0.0840958	0.000412165	0.00609082	-0.0839867	-0.0286376	0.00395843	-0.00294533	-0.036374	0.0253654	-0.0488628	0.0379052	-0.0689433	0.00401057	-0.0625058	-0.0426402	-0.0796745	0.0649144	0.071357	-0.0831016	0.0802134	0.0384283	-0.0869935	-0.0457193	0.0131391	0.0353809	0.0825385	-0.135268	-0.00142388	0.0390032	-0.017737	0.0347873	0.0650285	-0.0394587	-0.0575636	0.0658636	-0.0487571	0.133743	0.121706	-0.104437
189	0.023597	0.0651709	-0.0612488	0.00912498	0.0191967	-0.0632982	0.143799	0.0324816	-0.084045	-0.000598807	0.00545866	-0.0837223	-0.0294528	0.00529137	-0.00476606	-0.037098	0.0248379	-0.0482027	0.0354877	-0.0675852	0.00331866	-0.0614374	-0.0427961	-0.0790769	0.0651293	0.0727895	-0.0818972	0.0801612	0.0357742	-0.0915018	-0.0453472	0.0138856	0.0358396	0.0829332	-0.135971	-0.00152542	0.0406532	-0.0181644	0.0338294	0.0655214	-0.0392545	-0.0567256	0.0669029	-0.0497778	0.133938	0.12288	-0.104599
190	0.023883	0.0638549	-0.061069	0.00913969	0.0200251	-0.0628864	0.143712	0.0317227	-0.083978	-0.00162388	0.00481636	-0.0834379	-0.0302661	0.00662336	-0.0059829	-0.0378223	0.0243007	-0.047681	0.0357643	-0.0662002	0.00257449	-0.0603507	-0.0409053	-0.0784684	0.0653299	0.0748716	-0.0806597	0.0800989	0.0359351	-0.0921453	-0.0449705	0.0146436	0.036299	0.0833131	-0.136659	-0.00163676	0.0423092	-0.018596	0.032872	0.0660084	-0.03903	-0.0566612	0.0679415	-0.0507964	0.134122	0.123895	-0.104753
191	0.0241771	0.0633319	-0.060887	0.00915956	0.0208626	-0.0624633	0.143604	0.030958	-0.0838941	-0.00266312	0.00416434	-0.0831331	-0.0310771	0.00795379	-0.00713789	-0.0385464	0.0237536	-0.0471436	0.0360454	-0.0647882	0.00181687	-0.0592457	-0.0389902	-0.0778487	0.065516	0.0769728	-0.0793886	0.0800261	0.0353811	-0.092785	-0.0445878	0.0148168	0.0367588	0.0836778	-0.137332	0.00252028	0.0438186	-0.0190319	0.0318999	0.0664887	-0.038785	-0.0565864	0.0689786	-0.0518127	0.134295	0.124907	-0.104896
192	0.024048	0.0611163	-0.0607025	0.00918484	0.0217122	-0.0620289	0.143477	0.0297447	-0.0837923	-0.00371657	0.00350237	-0.0828075	-0.0329649	0.00912975	-0.00687828	-0.0392704	0.0231966	-0.0465902	0.0363305	-0.0633492	0.00104581	-0.0581226	-0.0370505	-0.0772169	0.0656528	0.0790928	-0.0780832	0.0799421	0.0347355	-0.0934202	-0.0441989	0.0155942	0.0372191	0.0840267	-0.137989	0.00242393	0.0454837	-0.0194716	0.0309271	0.066904	-0.0385192	-0.056501	0.0700141	-0.0528263	0.134455	0.125917	-0.10503
193	0.0243553	0.0612165	-0.0605155	0.00921585	0.0225848	-0.0615831	0.143328	0.0422292	-0.0836717	-0.00478426	0.00283046	-0.0824607	-0.0337718	0.0104548	-0.00811065	-0.0399936	0.0226295	-0.0460105	0.0366195	-0.0618589	0.000253325	-0.0569816	-0.0350858	-0.0765727	0.0658073	0.0835397	-0.0767429	0.0798465	0.0341614	-0.0940506	-0.0438037	0.0163833	0.0376797	0.0843592	-0.13863	0.00231797	0.0471533	-0.0199151	0.0299466	0.0673674	-0.0382323	-0.0599875	0.0710464	-0.0538367	0.134603	0.126922	-0.105154
194	0.0246712	0.061304	-0.0603257	0.00925284	0.0234818	-0.061126	0.143157	0.0414745	-0.0835313	-0.00586621	0.00214862	-0.0820926	-0.0345762	0.0117764	-0.00787229	-0.0407155	0.0220523	-0.0454228	0.0369122	-0.0603659	-0.00054457	-0.0552408	-0.0330957	-0.0759153	0.0659454	0.0856398	-0.0753674	0.0797386	0.0335773	-0.0946755	-0.0434013	0.0171841	0.0381406	0.0846749	-0.139254	0.00220237	0.0488271	-0.0203622	0.0289585	0.0673137	-0.0379242	-0.059901	0.0720751	-0.0548436	0.134737	0.127923	-0.105266
195	0.0249957	0.0618742	-0.0601329	0.00929612	0.0244041	-0.0606575	0.142963	0.0407141	-0.0833702	-0.00696241	0.000179826	-0.0817026	-0.0353777	0.013094	-0.00883581	-0.0414361	0.0214649	-0.0448172	0.0372082	-0.0588459	-0.00137048	-0.0540622	-0.03108	-0.0752442	0.0660664	0.0878302	-0.0739561	0.0796178	0.0326714	-0.0952951	-0.0429917	0.0179966	0.0386017	0.0849732	-0.139861	0.00207711	0.0505045	-0.0208127	0.0279627	0.0677541	-0.0388918	-0.0598075	0.0730994	-0.0558465	0.134857	0.12892	-0.105368
196	0.0253291	0.0619393	-0.0599369	0.00934596	0.0253398	-0.0601776	0.142745	0.040225	-0.0831874	-0.00807284	-0.00053064	-0.0812936	-0.0361763	0.0143153	-0.0100779	-0.0421547	0.0208671	-0.0440511	0.037508	-0.0572867	-0.00217347	-0.0528665	-0.0290384	-0.0745587	0.0661322	0.0900378	-0.0725087	0.0794836	0.0319225	-0.0959087	-0.0425745	0.0188209	0.039063	0.0852534	-0.14045	0.00194218	0.0521849	-0.0212662	0.0269562	0.0678224	-0.0385499	-0.0597023	0.0741187	-0.056845	0.134962	0.129911	-0.105458
197	0.0256714	0.0619905	-0.0597374	0.00940271	0.0262875	-0.0596864	0.142503	0.0394527	-0.0829817	-0.00919745	-0.0012508	-0.0808591	-0.0369723	0.0156226	-0.0113257	-0.0428442	0.0202589	-0.0434061	0.037811	-0.0557134	-0.00301118	-0.051654	-0.0269706	-0.0738582	0.0662174	0.0922622	-0.071025	0.0793352	0.0313037	-0.0965158	-0.0421493	0.0196568	0.0395243	0.085515	-0.141024	0.00179757	0.0538677	-0.0217227	0.0259454	0.0682372	-0.0381861	-0.0595849	0.075132	-0.0578386	0.135052	0.13086	-0.105536
198	0.0260227	0.0617532	-0.0595342	0.0094666	0.0272596	-0.0591838	0.142235	0.0386754	-0.0827523	-0.0103362	0.00209782	-0.0804017	-0.0377646	0.016924	-0.0125791	-0.0435575	0.0196403	-0.0427413	0.038117	-0.0541129	-0.00386204	-0.0504251	-0.0248762	-0.0731419	0.066284	0.094272	-0.0695046	0.0791721	0.0306739	-0.0971159	-0.0417157	0.0205043	0.0399856	0.0857574	-0.141581	0.00129264	0.0551799	-0.0221819	0.0249272	0.0684738	-0.0378002	-0.0594786	0.0761387	-0.0588267	0.135125	0.131838	-0.105601
[truncated: 3,301 more rows]

## Sheet: panel C entropy
	sub-102	sub-103	sub-104	sub-105	sub-106	sub-107	sub-108	sub-109	sub-110	sub-111	sub-112	sub-113	sub-114	sub-115	sub-116	sub-117	sub-118	sub-119	sub-120	sub-122	sub-123	sub-124	sub-125	sub-126	sub-127	sub-128	sub-129	sub-130	sub-131	sub-132	sub-133	sub-134	sub-135	sub-136	sub-137	sub-138	sub-139	sub-140	sub-142	sub-143	sub-144	sub-146	sub-147	sub-148	sub-149	sub-150	sub-151
[truncated: 3,500 more rows]

[truncated: 7 more sheets: panel C surprise, panel D correct, panel D error, panel E correct, panel E error, panel F correct, panel F error]
