# Supplementary material for: Pupil dilation offers a time-window on prediction error
Source: eLife. 2026 Jan 8;14:RP105287. doi: 10.7554/eLife.105287 (PMC12782557; doi:10.7554/eLife.105287)
Supplement: Table 1—source data 1. [file elife-105287-table1-data1.xlsx]

## Sheet: Table 1-source data
subject	20_error_t1	80_error_t1	20_correct_t1	80_correct_t1	20_error_t2	80_error_t2	20_correct_t2	80_correct_t2
sub-1	-0.360635	0.837868	-0.821548	-0.454599	0.749552	-0.807136	-0.66402	-0.331266
sub-10	-0.703457	-1.5017	7.12834	-2.16834	-0.482538	0.817133	2.91314	-1.20078
sub-11	-2.46675	-3.62402	-6.36869	-2.27961	-1.93885	-1.3305	-7.50379	-1.18192
sub-12	1.52766	1.72265	1.57694	0.0354631	1.89722	0.730623	1.24552	0.273167
sub-13	-1.01928	-5.0344	-3.10344	-3.26397	-0.768657	-3.78508	-8.93284	-4.53504
sub-14	1.44596	-1.98025	-5.2182	-2.31592	5.83653	0.225462	-2.98657	-0.225371
sub-15	0.681033	-1.58044	5.61523	-0.0905509	2.72386	-0.506494	0.766904	-1.33876
sub-16	0.694588	-1.20045	-0.70032	-1.08081	-3.54352	-9.05541	-7.24417	-4.90187
sub-18	1.36401	-1.03625	2.12974	-1.56347	-0.306172	-0.540569	-5.85377	-1.88853
sub-19	-0.297781	0.687066	1.2209	-0.246888	-2.31018	-0.63227	-1.33415	-1.01965
sub-20	0.800583	0.355391	2.03586	0.132792	0.0556125	-2.05806	0.226451	0.103357
sub-21	3.42776	-0.380162	3.57499	0.504004	0.723007	-4.18489	-2.42452	-2.60976
sub-23	-0.639535	0.2217	2.20757	0.220017	-0.112079	0.624896	1.55747	0.531224
sub-24	-2.85405	-1.0639	0.141613	-1.66234	-4.34064	-1.5301	-0.672583	-2.49864
sub-25	-1.89763	-2.63379	-3.46537	-2.72803	0.078069	-0.945588	-0.808156	-0.525892
sub-26	-2.31705	-1.57137	-1.54842	-1.603	-2.43659	-2.20071	-2.5617	-0.441405
sub-27	1.76281	0.563299	1.65057	0.601181	-0.124206	-3.79953	-3.6905	-3.41041
sub-31	3.08149	4.21592	5.26329	0.35075	3.87148	-4.57563	6.97231	1.50996
sub-32	5.19612	-0.253453	1.58708	1.51797	3.07467	-4.66102	-1.87398	0.962419
sub-33	3.18528	1.65142	0.516052	0.105885	-0.264898	-1.97035	-4.54582	-3.66228
sub-4	1.51085	1.66948	-2.54392	-0.283874	-1.05429	-2.58841	2.6478	-0.142528
sub-5	2.06912	1.72398	0.890201	1.1426	1.46067	0.789945	0.565097	1.16624
sub-7	2.1307	0.452667	-2.65452	-0.78638	3.01336	-1.23646	-2.07208	-0.88844
sub-9	2.37731	0.639329	-0.261354	-0.3183	3.34932	0.204232	-2.05495	-0.680277
