# Supplementary material for: Pupil dilation offers a time-window on prediction error
Source: eLife. 2026 Jan 8;14:RP105287. doi: 10.7554/eLife.105287 (PMC12782557; doi:10.7554/eLife.105287)
Supplement: Table 2—source data 1. [file elife-105287-table2-data1.xlsx]

## Sheet: Table 2-source data
subject	('pupil_feed_locked_t1', 20, False)	('pupil_feed_locked_t1', 40, False)	('pupil_feed_locked_t1', 80, False)	('pupil_feed_locked_t1', 20, True)	('pupil_feed_locked_t1', 40, True)	('pupil_feed_locked_t1', 80, True)	('pupil_feed_locked_t2', 20, False)	('pupil_feed_locked_t2', 40, False)	('pupil_feed_locked_t2', 80, False)	('pupil_feed_locked_t2', 20, True)	('pupil_feed_locked_t2', 40, True)	('pupil_feed_locked_t2', 80, True)
102	4.39858	6.42631	7.29295	1.86613	3.68713	4.08145	-1.29727	-4.47768	0.110809	1.64125	1.31246	1.14249
103	5.73925	5.34956	4.47506	2.96536	3.88482	3.08927	3.03509	0.468473	-0.035386	-1.76731	-0.386273	-4.13917
104	6.07684	1.07722	1.89054	5.12051	1.60376	2.42928	0.653532	4.39008	-0.339869	5.20131	-0.0771608	1.95635
105	1.48295	7.55865	4.5439	5.63079	2.48629	0.252441	1.64463	1.52591	0.289448	4.86958	6.01689	2.9988
106	9.26929	10.6875	9.44208	7.89294	6.26414	6.43665	-3.60487	0.403451	-2.38654	-1.91892	-2.31995	-2.57738
107	4.5555	4.5774	1.52416	3.26239	2.98137	1.11425	-0.521173	-1.7682	-10.0431	-3.32275	-1.73559	0.933443
108	3.00844	2.48883	4.95382	4.55429	4.83759	4.60013	-2.58356	-0.826469	-2.91076	0.857246	0.201932	-1.14905
109	3.18124	1.98581	1.54935	1.29209	1.35734	2.01417	2.98271	1.56227	1.04489	0.0026818	-0.938578	1.21906
110	4.41357	6.94746	6.10205	2.67179	1.29981	0.781307	-5.62098	-10.1406	-3.38818	-1.04876	-0.69818	-0.172648
111	2.91152	10.9372	13.0268	-0.898267	0.64481	2.56295	1.24256	12.6342	5.2823	-1.43581	-2.8647	2.12791
112	4.15948	4.53828	3.17888	2.23402	2.69046	1.85192	3.20668	3.79722	1.18766	-0.251291	-1.14507	-0.184474
113	8.60093	6.55395	12.7576	3.66842	3.90501	2.12175	2.76413	3.37925	2.06905	3.79351	1.95276	1.14831
114	3.43885	13.3162	3.0348	2.22935	2.16423	3.6014	-9.49209	2.986	2.42288	-2.08598	0.801552	-1.42018
115	2.12064	6.02948	2.30388	-0.246715	1.83579	0.430876	-3.94042	2.11881	0.0491893	-2.97491	-1.61723	-2.19425
116	4.81127	4.22283	3.79831	2.55894	2.73127	2.51	-0.957226	3.64925	0.279162	1.203	1.03531	0.224867
117	1.75363	3.97542	3.23362	1.39679	1.65755	2.49514	-1.01772	-1.70237	-2.09278	-0.767009	0.235576	-0.101103
118	7.65846	10.4377	7.86846	0.93049	3.41538	2.21068	-0.75825	2.71934	1.76195	1.53115	2.72327	2.70353
119	6.35062	3.09343	4.96022	2.72095	3.79616	1.43171	1.97973	-7.76384	-4.042	-1.47674	-1.24608	-1.27856
120	-0.299616	-0.198872	4.42542	-1.02299	-0.135294	-1.57351	-9.06733	-15.5039	-16.398	-1.99814	-4.81802	-3.01889
122	6.43968	4.2044	5.33808	2.72377	3.20229	3.33213	-0.766824	1.01284	1.90737	0.652978	2.74401	2.58559
123	1.37248	3.45182	2.0185	-0.0885145	2.14025	1.53009	-3.77987	2.69581	-2.2185	-0.193261	1.1246	2.83072
124	3.63301	4.51591	6.73049	-0.266272	3.65329	1.27139	0.454688	-9.88583	-0.786611	-1.71919	-0.465365	0.287935
125	7.35845	10.0886	6.40833	5.8675	3.94896	5.36898	-8.46075	13.1451	1.75458	0.501075	4.59766	6.22604
126	-1.80389	1.47814	4.05579	2.23872	-0.284903	0.425476	-4.44413	0.948607	6.42921	1.69254	-2.54458	-0.0182382
127	2.598	5.11828	10.2998	2.40382	2.01116	1.92989	-3.11782	1.61073	6.64893	-0.435781	0.810604	3.03078
128	2.87973	6.82688	1.06206	4.23203	0.237924	1.38155	-3.70385	-5.58689	-1.90394	5.36347	0.641392	0.718728
129	6.26477	3.86977	2.53206	0.0561008	1.19114	2.07689	-1.69794	-2.76287	-8.61066	-2.25829	-2.92034	-0.870134
130	1.41033	3.71284	1.65267	-0.909079	-0.260521	0.193039	-2.08211	2.90461	-1.60194	0.76305	1.60836	0.971197
131	6.9801	7.33225	6.0666	1.4123	2.66359	2.83985	-1.2401	2.31144	-1.34402	0.447628	0.727311	0.279573
132	-4.84657	4.46813	-3.47138	-0.409544	0.475294	-0.353366	-15.5554	-1.58371	-14.0628	2.2346	1.47337	1.16148
133	4.51754	10.3812	7.41932	1.62699	5.04503	1.51311	-6.16487	5.07167	-7.87991	-0.436203	0.208814	-1.88346
134	5.43264	6.71051	6.07988	3.162	3.60611	2.94072	-4.21685	-1.099	-3.16667	-2.92327	-5.17342	-1.3013
135	5.58776	8.37912	6.30174	2.31928	2.30098	2.17739	-2.96418	-1.21862	2.76928	-1.10098	-0.968381	-0.0842424
136	2.29172	1.9149	3.65103	4.85773	3.99491	2.06866	-4.38097	-2.35766	-0.454076	3.39691	-0.22489	0.547394
137	7.1365	4.27831	6.22266	1.66779	-1.09217	1.29268	4.56579	2.76089	8.98001	-0.64755	-2.25043	-0.52275
138	-2.56203	-1.23681	6.57209	1.3161	0.502792	0.425158	-1.08274	-0.0476764	8.42775	1.2058	1.57825	0.230622
139	5.11511	6.28123	4.71363	1.32557	0.611351	-0.0163134	-4.50897	-8.57174	-8.82912	-0.236138	-0.762837	-1.23121
140	5.85658	8.22221	5.59793	2.80266	1.36236	1.64289	-1.32282	-0.158834	1.13816	-1.2813	-4.32517	-2.34366
142	-2.36224	3.55111	30.522	4.06292	0.752321	0.924517	-23.4123	-6.78139	35.9404	1.84791	-3.53952	-0.86471
143	2.83152	5.94831	-0.152237	0.873595	1.06549	1.21735	0.597237	1.092	-2.65403	-0.875307	0.828122	0.4234
144	4.4324	0.834296	1.75295	2.39159	0.695804	2.70529	2.06853	1.62785	-2.22169	0.288794	-0.106857	1.922
146	3.04713	2.04008	5.18147	1.0736	-2.37392	-0.0146742	1.27911	2.89539	-0.435136	0.609254	-3.06706	-3.3869
147	7.26372	5.48558	13.7313	1.38536	0.950827	1.71978	-0.986273	-5.58958	1.8037	-0.886219	-1.86211	-0.892898
148	8.1214	9.54853	7.81155	5.82561	6.80984	5.63506	-2.11031	-1.48304	-3.64291	3.30905	2.33299	2.4974
149	4.87278	7.98199	9.02819	3.78325	3.8627	1.29632	1.60443	5.49984	3.51314	2.9845	1.89505	1.04304
150	-1.83291	2.90153	2.65937	4.44965	2.26025	4.01811	-5.94271	-6.47618	-8.24377	0.482261	-0.419064	0.368126
151	6.08513	10.5016	6.11129	4.14712	4.00422	2.14812	-6.39436	2.13536	-7.62014	-0.132254	0.731865	-1.50671
