# Supplementary material for: Pupil dilation offers a time-window on prediction error
Source: eLife. 2026 Jan 8;14:RP105287. doi: 10.7554/eLife.105287 (PMC12782557; doi:10.7554/eLife.105287)
Supplement: Table 3—source data 1. [file elife-105287-table3-data1.xlsx]

## Sheet: task-cue_target_orientation_sub
	iBlock	iRun	trial_counter	trial	timing_bl	jitter_t_BL	timing_cue	play_tone	timing_ITI	timing_target	keypress	reaction_time	cue_ori	target_ori	mapping1	phase1	frequency	correct	subject	blinks_ratio	blinks_exclude	pupil_target_locked_t1	pupil_target_locked_t2	pupil_baseline_target_locked	outlier_rt	exclude	cue_target_pair	model_p	model_i	model_H	model_D
0	1	1	1	1	(260.70783473957727, 'Miss', 'Miss')	360	263.705	1	264.706	272.691	left	4.98818	45	315	1	1	80	1	sub-1	0	FALSE	1.29536	4.71378	3.17659	0	0	2	0.25	2	1.92193	0.0780719
1	1	1	2	2	(275.6915351832831, 'Miss', 'Miss')	300	278.192	1	279.192	283.043	left	0.854216	45	315	1	1	80	1	sub-1	0	FALSE	5.04161	7.7576	-7.59025	0	0	2	0.4	1.32193	1.79248	0.207519
2	1	1	3	3	(286.0436243528475, 'Miss', 'Miss')	348	288.944	0	289.944	293.995	right	1.05325	45	315	1	1	80	0	sub-1	0.125714	FALSE	-3.80646	-2.24484	0.645376	0	0	2	0.5	1	1.6645	0.0860017
3	1	1	4	4	(296.99589445597576, 'Miss', 'Miss')	396	300.296	1	301.296	305.164	right	0.870325	0	45	1	1	80	1	sub-1	0	FALSE	1.15374	6.7657	-3.01521	0	0	1	0.142857	2.80735	1.75	0.0424813
4	1	1	5	5	(308.1647954662858, 'Miss', 'Miss')	336	310.965	0	311.965	315.633	left	0.670835	45	315	1	1	80	1	sub-1	0	FALSE	-6.76756	-3.92407	2.08288	0	0	2	0.5	1	1.65774	0.0385011
5	1	1	6	6	(318.6336006556003, 'Miss', 'Miss')	360	321.634	0	322.634	326.051	right	0.420401	0	45	1	1	80	1	sub-1	0	FALSE	2.20842	10.0124	-9.04489	0	0	1	0.222222	2.16993	1.68548	0.0145247
6	1	1	7	7	(329.05238612032645, 'Miss', 'Miss')	336	331.853	1	332.853	336.52	left	0.670065	45	315	1	1	80	1	sub-1	0	FALSE	-2.40983	0.422803	-0.963845	0	0	2	0.5	1	1.61719	0.0135019
7	1	1	8	8	(339.52118021282604, 'Miss', 'Miss')	384	342.722	1	343.722	347.172	right	0.453545	0	45	1	1	80	1	sub-1	0	FALSE	-2.37048	0.52984	4.56787	0	0	1	0.272727	1.87447	1.62581	0.00682863
8	1	1	9	9	(350.17336609113045, 'Miss', 'Miss')	408	353.574	0	354.574	358.108	right	0.53756	0	45	1	1	80	1	sub-1	0	FALSE	-2.96142	-2.01912	-0.50935	0	0	1	0.333333	1.58496	1.61433	0.0424402
9	1	1	10	10	(361.1089504688125, 'Miss', 'Miss')	300	363.609	0	364.609	367.96	right	0.353655	0	315	0	1	20	0	sub-1	0	FALSE	-0.705096	-0.984946	2.83331	0	0	0	0.0769231	3.70044	1.7274	0.035439
10	1	1	11	11	(370.9609494767574, 'Miss', 'Miss')	372	374.061	0	375.061	399.15	left	21.0915	45	315	1	1	80	1	sub-1	0.208571	FALSE	3.66837	-4.60134	1.01526	1	1	2	0.428571	1.22239	1.68948	0.0306656
11	1	1	12	12	(402.15063121456296, 'Miss', 'Miss')	384	405.351	0	406.351	409.902	right	0.553253	0	45	1	1	80	1	sub-1	0.109714	FALSE	5.76561	7.02871	-5.65547	0	0	1	0.333333	1.58496	1.67742	0.00328951
12	1	1	13	13	(412.9028704130624, 'Miss', 'Miss')	372	416.003	0	417.003	420.504	right	0.503464	0	45	1	1	80	1	sub-1	0	FALSE	1.24181	-4.85713	0.578491	0	0	1	0.375	1.41504	1.65788	0.0193094
13	1	1	14	14	(423.50499717308685, 'Miss', 'Miss')	372	426.605	0	427.605	430.623	right	0.0195989	0	45	1	1	80	1	sub-1	0	FALSE	-2.41285	-2.35916	1.14839	0	0	1	0.411765	1.28011	1.63373	0.0145361
14	1	1	15	15	(433.6237436325091, 'Miss', 'Miss')	408	437.024	1	438.024	441.375	right	0.353277	0	45	1	1	80	1	sub-1	0.178857	FALSE	-3.25073	5.05406	-3.17254	0	0	1	0.444444	1.16993	1.60683	0.011279
15	1	1	16	16	(444.37586492735227, 'Miss', 'Miss')	336	447.176	0	448.176	465.947	right	14.7727	0	45	1	1	80	1	sub-1	0	FALSE	-4.43009	-3.94111	2.1458	1	1	1	0.473684	1.078	1.57839	0.00896095
16	1	1	17	17	(468.94758225375244, 'Miss', 'Miss')	336	471.748	0	472.748	476.032	left	0.286399	45	315	1	1	80	1	sub-1	0.148571	FALSE	-3.47003	-5.20926	5.5572	0	0	2	0.35	1.51457	1.57235	0.00138112
17	1	1	18	18	(479.0329450557865, 'Miss', 'Miss')	300	481.533	1	482.533	485.967	left	0.43645	45	315	1	1	80	1	sub-1	0.112	FALSE	-3.11891	-4.98598	3.0326	0	0	2	0.380952	1.39232	1.56177	0.0108206
18	1	1	19	19	(488.9683050003914, 'Miss', 'Miss')	312	491.568	0	492.569	496.186	left	0.620424	45	315	1	1	80	1	sub-1	0.419429	TRUE	1.16775	5.93339	-9.38918	0	0	2	0.409091	1.28951	1.54797	0.0087242
19	1	1	20	20	(499.18702627004404, 'Miss', 'Miss')	396	502.487	1	503.488	506.938	left	0.454937	45	315	1	1	80	1	sub-1	0.118286	FALSE	-2.97426	0.738027	0.13621	0	0	2	0.434783	1.20163	1.53192	0.00715965
20	1	1	21	21	(509.93923744908625, 'Miss', 'Miss')	408	513.34	1	514.34	517.79	left	0.453065	45	315	1	1	80	1	sub-1	0.140571	FALSE	-5.14598	-0.0601572	1.86629	0	0	2	0.458333	1.12553	1.5143	0.00596228
21	1	1	22	22	(520.7914414706829, 'Miss', 'Miss')	408	524.192	0	525.192	528.593	left	0.40415	45	45	0	1	20	0	sub-1	0.114857	FALSE	-6.20557	0.369347	2.37384	0	0	3	0.04	4.64386	1.61433	0.0193832
22	1	1	23	23	(531.5936238257491, 'Miss', 'Miss')	360	534.594	0	535.594	538.695	right	0.103375	0	315	0	1	20	0	sub-1	0.120571	FALSE	-0.807694	-1.32207	2.39724	0	0	0	0.0769231	3.70044	1.68105	0.0280386
23	1	1	24	24	(541.6956945468592, 'Miss', 'Miss')	312	544.296	1	545.296	548.613	left	0.319905	0	315	0	1	20	1	sub-1	0	FALSE	0.272629	-3.30711	1.8582	0	0	0	0.111111	3.16993	1.7274	0.0359419
24	1	1	25	25	(551.6143609982473, 'Miss', 'Miss')	384	554.815	0	555.815	559.316	left	0.503347	0	315	0	1	20	1	sub-1	0	FALSE	2.6111	2.67377	-2.69629	0	0	0	0.142857	2.80735	1.75976	0.0239695
25	1	1	26	26	(562.3165588333695, 'Miss', 'Miss')	396	565.617	0	566.617	576.836	right	7.22217	45	45	0	1	20	1	sub-1	0.104571	FALSE	-2.62116	-5.94716	0.714482	1	1	3	0.0689655	3.85798	1.82011	0.0126153
26	1	1	27	27	(579.8367503200043, 'Miss', 'Miss')	384	583.037	0	584.037	587.371	right	0.336256	45	315	1	1	80	0	sub-1	0	FALSE	-5.56479	0.287603	2.85162	0	0	2	0.4	1.32193	1.80292	0.00881989
27	1	1	28	28	(590.3722240624438, 'Miss', 'Miss')	336	593.173	0	594.173	597.307	left	0.136252	45	315	1	1	80	1	sub-1	0.125714	FALSE	3.50656	-2.69487	-1.73459	0	0	2	0.419355	1.25376	1.78479	0.00418728
28	1	1	29	29	(600.3076098071433, 'Miss', 'Miss')	396	603.608	1	604.608	608.059	left	0.454152	45	45	0	1	20	0	sub-1	0.254857	FALSE	1.92167	4.94625	-0.356978	0	0	3	0.09375	3.41504	1.82828	0.00546773
29	1	1	30	30	(611.0597874183204, 'Miss', 'Miss')	348	613.96	1	614.96	618.361	right	0.403459	45	45	0	1	20	1	sub-1	0.110286	FALSE	-0.695727	-2.13398	0.34694	0	0	3	0.121212	3.04439	1.85977	0.0209145
30	1	1	31	31	(621.3618621342839, 'Miss', 'Miss')	384	624.562	1	625.562	629.38	left	0.82069	0	45	1	1	80	0	sub-1	0	FALSE	-0.752206	-1.45063	3.37899	0	0	1	0.294118	1.76553	1.85568	0.00431622
31	1	1	32	32	(632.3808146615556, 'Miss', 'Miss')	408	635.781	1	636.781	640.065	right	0.288015	0	45	1	1	80	1	sub-1	0.120571	FALSE	-3.75245	-2.48602	0.726991	0	0	1	0.314286	1.66985	1.84932	0.00521598
32	1	1	33	33	(643.0663212228246, 'Miss', 'Miss')	372	646.167	1	647.167	650.201	right	0.0369982	45	45	0	1	20	1	sub-1	0.117143	FALSE	-1.17266	0.483894	-1.14963	0	0	3	0.138889	2.848	1.87318	0.0031966
33	1	1	34	34	(653.2016782267738, 'Miss', 'Miss')	408	656.602	1	657.602	660.703	right	0.103887	0	45	1	1	80	1	sub-1	0.255429	FALSE	1.43294	1.09616	-3.41749	0	0	1	0.324324	1.62449	1.86561	0.0030346
34	1	1	35	35	(663.7037921699766, 'Miss', 'Miss')	408	667.104	0	668.104	671.505	left	0.403053	45	315	1	1	80	1	sub-1	0.124571	FALSE	-1.48172	-2.21928	1.95077	0	0	2	0.368421	1.44057	1.8539	0.000826504
35	1	1	36	36	(674.5060441575552, 'Miss', 'Miss')	408	677.906	0	678.907	682.407	left	0.504157	0	315	0	1	20	1	sub-1	0.116571	FALSE	-3.4529	1.95097	-0.0262173	0	0	0	0.128205	2.96347	1.87871	0.00278046
36	1	1	37	37	(685.408221297118, 'Miss', 'Miss')	384	688.609	0	689.609	700.694	left	8.08798	0	45	1	1	80	0	sub-1	0	FALSE	-1.24113	1.59432	-0.143258	1	1	1	0.325	1.62149	1.87155	0.00285068
37	1	1	38	38	(703.6952370806721, 'Miss', 'Miss')	324	706.395	1	707.396	710.696	right	0.303381	0	45	1	1	80	1	sub-1	0.120571	FALSE	6.40837	-1.64642	-1.85723	0	0	1	0.341463	1.5502	1.86312	0.00334313
38	1	1	39	39	(713.6972966494832, 'Miss', 'Miss')	312	716.298	0	717.298	720.565	left	0.270871	45	315	1	1	80	1	sub-1	0.119429	FALSE	-2.42872	-7.42691	3.26994	0	0	2	0.357143	1.48543	1.85364	0.000654356
39	1	1	40	40	(723.5659428214431, 'Miss', 'Miss')	408	726.966	0	727.966	731.234	right	0.271379	0	45	1	1	80	1	sub-1	0.117143	FALSE	1.44323	0.328999	0.898411	0	0	1	0.348837	1.51937	1.84535	0.000601735
40	1	1	41	41	(734.234765044368, 'Miss', 'Miss')	384	737.435	1	738.435	741.869	right	0.437849	0	45	1	1	80	1	sub-1	0.121714	FALSE	-0.063685	-5.65492	-1.25814	0	0	1	0.363636	1.45943	1.83615	0.00262784
41	1	1	42	42	(744.870258261717, 'Miss', 'Miss')	408	748.271	0	749.271	752.505	right	0.236719	0	45	1	1	80	1	sub-1	0.244	FALSE	2.09284	0.907229	-3.84164	0	0	1	0.377778	1.40439	1.82621	0.00236205
42	1	1	43	43	(755.5057512016465, 'Miss', 'Miss')	336	758.306	1	759.306	762.707	right	0.404809	0	45	1	1	80	1	sub-1	0.270857	FALSE	0.150789	-2.43336	1.06165	0	0	1	0.391304	1.35364	1.81565	0.00213294
43	1	1	44	44	(765.7078638687162, 'Miss', 'Miss')	348	768.608	0	769.608	772.942	right	0.336931	0	45	1	1	80	1	sub-1	0.206286	FALSE	-1.69076	-5.45246	2.79933	0	0	1	0.404255	1.30666	1.80459	0.00193408
44	1	1	45	45	(775.9432309152817, 'Miss', 'Miss')	336	778.743	1	779.744	783.428	right	0.68695	45	315	1	1	80	0	sub-1	0.154286	FALSE	-4.33531	-4.01794	3.69417	0	0	2	0.333333	1.58496	1.79951	0.000427578
45	1	1	46	46	(786.4287384752643, 'Miss', 'Miss')	396	789.729	1	790.729	794.047	left	0.319735	45	315	1	1	80	1	sub-1	0.127429	FALSE	-1.15062	2.68585	0.0916167	0	0	2	0.346939	1.52725	1.79352	0.00227931
46	1	1	47	47	(797.0475154509277, 'Miss', 'Miss')	372	800.148	1	801.148	804.782	right	0.636349	0	45	1	1	80	1	sub-1	0.227429	FALSE	4.56707	0.89649	-0.920996	0	0	1	0.4	1.32193	1.78386	0.000372635
47	1	1	48	48	(807.7830389625815, 'Miss', 'Miss')	360	810.783	1	811.784	815.134	right	0.353238	0	45	1	1	80	1	sub-1	0.0622857	FALSE	2.57891	-6.67374	0.201293	0	0	1	0.411765	1.28011	1.77379	0.00159104
48	1	1	49	49	(818.1351472741508, 'Miss', 'Miss')	372	821.235	0	822.236	825.536	right	0.303349	0	45	1	1	80	1	sub-1	0.123429	FALSE	-3.72752	-1.79147	-0.647111	0	0	1	0.423077	1.24101	1.76339	0.00146006
49	1	1	50	50	(828.5372572779852, 'Miss', 'Miss')	372	831.638	1	832.638	835.972	left	0.336649	45	315	1	1	80	1	sub-1	0.436	TRUE	-3.01121	-1.63675	1.21014	0	0	2	0.339623	1.558	1.75911	0.000312318
50	1	1	51	51	(838.9727035003243, 'Miss', 'Miss')	312	841.573	1	842.573	852.658	left	7.08926	45	315	1	1	80	1	sub-1	0.204	FALSE	2.72415	4.7605	-3.34585	0	0	2	0.351852	1.50696	1.75409	0.00183459
51	1	1	52	52	(855.6594082401616, 'Miss', 'Miss')	384	858.86	1	859.86	863.194	right	0.336878	0	45	1	1	80	1	sub-1	0.437714	TRUE	-1.04828	-3.91994	3.5971	0	0	1	0.418182	1.2578	1.7449	0.000275878
52	1	1	53	53	(866.1948500792596, 'Miss', 'Miss')	300	868.695	0	869.695	872.896	left	0.204015	45	45	0	1	20	0	sub-1	0.124	FALSE	-1.51349	6.51161	-4.03748	0	0	3	0.107143	3.22239	1.76905	0.00163391
53	1	1	54	54	(875.8968343006982, 'Miss', 'Miss')	408	879.297	0	880.297	888.499	right	5.2058	0	45	1	1	80	1	sub-1	0.176	FALSE	-2.63252	2.86812	-3.80095	0	0	1	0.421053	1.24793	1.75977	0.0015996
54	1	1	55	55	(891.4999827999372, 'Miss', 'Miss')	384	894.7	1	895.701	899.685	right	0.988052	0	45	1	1	80	1	sub-1	0.264571	FALSE	3.33797	2.89436	-0.45778	0	0	1	0.431034	1.21412	1.75025	0.00113523
55	1	1	56	56	(902.685596445468, 'Miss', 'Miss')	324	905.386	0	906.386	909.653	right	0.270833	45	315	1	1	80	0	sub-1	0.132571	FALSE	1.62515	3.56314	-3.10968	0	0	2	0.338983	1.56071	1.7467	0.000246193
56	1	1	57	57	(912.6543020408708, 'Miss', 'Miss')	360	915.655	0	916.655	920.305	right	0.654522	0	45	1	1	80	1	sub-1	0.257143	FALSE	-3.10255	-0.42888	1.56503	0	0	1	0.433333	1.20645	1.73759	0.000237942
57	1	1	58	58	(923.3064435319166, 'Miss', 'Miss')	360	926.307	0	927.307	930.408	left	0.103641	45	315	1	1	80	1	sub-1	0.128	FALSE	1.87697	-4.09359	0.483533	0	0	2	0.344262	1.53842	1.73402	0.000220132
58	1	1	59	59	(933.408469865768, 'Miss', 'Miss')	396	936.709	1	937.709	941.96	right	1.25399	45	315	1	1	80	0	sub-1	0.120571	FALSE	1.41177	3.33922	-2.76611	0	0	2	0.354839	1.49476	1.7299	0.00137208
59	1	1	60	60	(944.9608448892786, 'Miss', 'Miss')	300	947.461	1	948.461	951.595	right	0.137227	0	315	0	1	20	0	sub-1	0	FALSE	-0.282661	-3.70324	1.39816	0	0	0	0.0952381	3.39232	1.75427	0.00156732
60	1	1	61	61	(954.5961408607463, 'Miss', 'Miss')	396	957.896	0	958.897	962.731	left	0.83797	45	315	1	1	80	1	sub-1	0	FALSE	-4.18934	-2.0907	0.0985696	0	0	2	0.359375	1.47644	1.74969	0.00153303
61	1	1	62	62	(965.7316840137628, 'Miss', 'Miss')	324	968.432	0	969.432	972.966	right	0.536925	0	45	1	1	80	1	sub-1	0.129714	FALSE	-1.62909	-0.291423	1.44971	0	0	1	0.415385	1.26748	1.74215	0.000192257
62	1	1	63	63	(975.9670904540208, 'Miss', 'Miss')	372	979.067	1	980.068	983.285	left	0.21984	45	315	1	1	80	1	sub-1	0	FALSE	-2.08197	-4.74606	2.06208	0	0	2	0.363636	1.45943	1.73765	0.000180563
63	1	1	64	64	(986.2857809854968, 'Miss', 'Miss')	360	989.286	1	990.286	993.42	left	0.136489	45	315	1	1	80	1	sub-1	0.177143	FALSE	-0.962694	-0.8544	-0.908924	0	0	2	0.373134	1.42223	1.73275	0.00108433
64	1	1	65	65	(996.421238415619, 'Miss', 'Miss')	336	999.221	0	1000.22	1003.47	left	0.253545	45	315	1	1	80	1	sub-1	0	FALSE	-1.10813	-0.258038	-2.45633	0	0	2	0.382353	1.38702	1.7275	0.00101177
65	1	1	66	66	(1006.473274708861, 'Miss', 'Miss')	408	1009.87	0	1010.87	1014.02	right	0.153654	0	45	1	1	80	1	sub-1	0.0862857	FALSE	3.03084	1.58798	-1.39659	0	0	1	0.405797	1.30117	1.72119	0.000154771
66	1	1	67	67	(1017.0254108734362, 'Miss', 'Miss')	336	1019.83	1	1020.83	1024.19	left	0.370103	0	315	0	1	20	1	sub-1	0.132	FALSE	-0.706934	-0.992787	-1.71751	0	0	0	0.1	3.32193	1.7425	0.00116208
67	1	1	68	68	(1027.1941007668456, 'Miss', 'Miss')	372	1030.29	1	1031.29	1034.63	left	0.337671	45	45	0	1	20	0	sub-1	0	FALSE	-2.43867	-5.74734	1.22261	0	0	3	0.0985915	3.34239	1.76349	0.00216803
68	1	1	69	69	(1037.6295392214142, 'Miss', 'Miss')	336	1040.43	1	1041.43	1045.18	right	0.753546	45	315	1	1	80	0	sub-1	0.124571	FALSE	-0.169184	-7.71031	3.09738	0	0	2	0.375	1.41504	1.75849	0.00115884
69	1	1	70	70	(1048.1816889795873, 'Miss', 'Miss')	312	1050.78	1	1051.78	1055.45	left	0.670785	0	45	1	1	80	0	sub-1	0.234286	FALSE	0.717767	-3.79018	0.337056	0	0	1	0.39726	1.33184	1.75253	0.000152389
70	1	1	71	71	(1058.4504327480317, 'Miss', 'Miss')	348	1061.35	0	1062.35	1066.44	left	1.08736	45	315	1	1	80	1	sub-1	0.220571	FALSE	-3.48144	-1.15761	4.69407	0	0	2	0.378378	1.4021	1.74764	0.000145123
71	1	1	72	72	(1069.4359106240354, 'Miss', 'Miss')	312	1072.04	0	1073.04	1076.62	left	0.587315	45	315	1	1	80	1	sub-1	0.245714	FALSE	-3.27637	-1.08566	2.12844	0	0	2	0.386667	1.37084	1.74249	0.00081625
72	1	1	73	73	(1079.6213608689695, 'Miss', 'Miss')	372	1082.72	0	1083.72	1086.97	left	0.253199	45	45	0	1	20	0	sub-1	0.126857	FALSE	4.52803	8.75352	-7.81864	0	0	3	0.105263	3.24793	1.76104	0.000949202
73	1	1	74	74	(1089.9734733418445, 'Miss', 'Miss')	348	1092.87	0	1093.87	1097.02	right	0.154487	45	315	1	1	80	0	sub-1	0.534286	TRUE	-0.437689	1.30692	-2.48448	0	0	2	0.38961	1.3599	1.75571	0.000933015
74	1	1	75	75	(1100.0255176802775, 'Miss', 'Miss')	324	1102.73	1	1103.73	1106.98	right	0.253893	45	315	1	1	80	0	sub-1	0.253143	FALSE	5.66566	7.01317	-7.51542	0	0	2	0.397436	1.33121	1.75016	0.000720994
75	1	1	76	76	(1109.977510917879, 'Miss', 'Miss')	408	1113.38	1	1114.38	1118.31	right	0.937047	0	45	1	1	80	1	sub-1	0.398857	FALSE	-0.557384	2.77664	-0.734759	0	0	1	0.379747	1.39689	1.74556	0.000126564
76	1	1	77	77	(1121.3131620983859, 'Miss', 'Miss')	396	1124.61	0	1125.61	1129.51	right	0.903826	0	315	0	1	20	0	sub-1	0.270286	FALSE	0.0267959	0.446427	0.410086	0	0	0	0.1	3.32193	1.76406	0.000915957
77	1	1	78	78	(1132.5154617467833, 'Miss', 'Miss')	408	1135.92	1	1136.92	1140.37	left	0.453702	45	315	1	1	80	1	sub-1	0.123429	FALSE	-1.23288	1.79307	0.567172	0	0	2	0.395062	1.33985	1.75873	0.000892321
78	1	1	79	79	(1143.36757588418, 'Miss', 'Miss')	408	1146.77	1	1147.77	1151.49	right	0.719959	0	45	1	1	80	1	sub-1	0	FALSE	-3.62903	-9.07649	0.332054	0	0	1	0.378049	1.40336	1.75427	0.000120499
79	1	1	80	80	(1154.4865098797718, 'Miss', 'Miss')	336	1157.29	0	1158.29	1161.57	left	0.287479	45	45	0	1	20	0	sub-1	0.126286	FALSE	-0.761357	-2.50128	1.39452	0	0	3	0.108434	3.20511	1.77073	0.000779213
80	1	1	81	81	(1164.571877120532, 'Miss', 'Miss')	372	1167.67	0	1168.67	1171.86	right	0.18646	0	45	1	1	80	1	sub-1	0.461143	TRUE	-0.190275	4.20472	-1.32931	0	0	1	0.380952	1.39232	1.76611	0.000766576
81	1	1	82	82	(1174.8572869175769, 'Miss', 'Miss')	324	1177.56	1	1178.56	1182.44	left	0.886528	0	45	1	1	80	0	sub-1	0.349714	FALSE	2.24931	-0.18454	2.09123	0	0	1	0.388235	1.365	1.7613	0.000631001
82	1	1	83	83	(1185.4427851007513, 'Miss', 'Miss')	360	1188.44	0	1189.44	1193.23	right	0.788303	45	315	1	1	80	0	sub-1	0	FALSE	-0.945085	-8.48182	2.28974	0	0	2	0.383721	1.38187	1.75678	0.000110349
83	1	1	84	84	(1196.2282706335563, 'Miss', 'Miss')	408	1199.63	0	1200.63	1203.73	right	0.103048	0	45	1	1	80	1	sub-1	0.119429	FALSE	1.86357	2.40779	-3.32039	0	0	1	0.390805	1.35548	1.75208	0.000106348
84	1	1	85	85	(1206.7304289640178, 'Miss', 'Miss')	336	1209.53	0	1210.53	1213.73	left	0.204449	45	315	1	1	80	1	sub-1	0.253143	FALSE	-0.56541	-1.01567	0.9746	0	0	2	0.386364	1.37197	1.74766	0.000102338
85	1	1	86	86	(1216.7324383197429, 'Miss', 'Miss')	300	1219.23	1	1220.23	1224.28	right	1.05377	45	315	1	1	80	0	sub-1	0.125714	FALSE	0.624043	-2.20501	-0.18577	0	0	2	0.393258	1.34645	1.74307	0.000563386
86	1	1	87	87	(1227.2845761488397, 'Miss', 'Miss')	300	1229.78	1	1230.78	1233.85	right	0.071011	0	45	1	1	80	1	sub-1	0	FALSE	-1.67938	-1.33841	1.2637	0	0	1	0.388889	1.36257	1.73875	9.50862e-05
87	1	1	88	88	(1236.853147528268, 'Miss', 'Miss')	372	1239.95	1	1240.95	1245.02	right	1.07061	0	315	0	1	20	0	sub-1	0.122286	FALSE	1.23345	3.06261	-0.71947	0	0	0	0.0989011	3.33787	1.75538	0.000716601
88	1	1	89	89	(1248.0220787773978, 'Miss', 'Miss')	408	1251.42	1	1252.42	1259.21	left	3.78774	0	45	1	1	80	0	sub-1	0.328	FALSE	-1.72248	-0.940404	-0.767878	0	0	1	0.391304	1.35364	1.75093	0.000706586
89	1	1	90	90	(1262.2082924831848, 'Miss', 'Miss')	324	1264.91	0	1265.91	1269.38	left	0.470039	45	315	1	1	80	1	sub-1	0.175429	FALSE	1.73418	-3.52813	-1.56834	0	0	2	0.387097	1.36923	1.74674	9.11783e-05
90	1	1	91	91	(1272.3770120605732, 'Miss', 'Miss')	324	1275.08	0	1276.08	1279.11	left	0.0377749	45	315	1	1	80	1	sub-1	0.141143	FALSE	2.18741	1.18178	-3.10957	0	0	2	0.393617	1.34514	1.74239	0.000504208
91	1	1	92	92	(1282.1123435973323, 'Miss', 'Miss')	312	1284.71	1	1285.71	1289.71	right	1.00383	45	315	1	1	80	0	sub-1	0.0302857	FALSE	1.66433	-1.34211	1.72299	0	0	2	0.4	1.32193	1.73789	0.000480573
92	1	1	93	93	(1292.7144600928032, 'Miss', 'Miss')	408	1296.11	1	1297.12	1300.47	right	0.353873	0	45	1	1	80	1	sub-1	0.306286	FALSE	-2.02807	0.526381	-0.480606	0	0	1	0.385417	1.37551	1.73403	8.22623e-05
93	1	1	94	94	(1303.4666285491085, 'Miss', 'Miss')	372	1306.57	0	1307.57	1310.73	right	0.170168	0	45	1	1	80	1	sub-1	0.539429	TRUE	-0.129323	3.69194	0.0900371	0	0	1	0.391753	1.35199	1.73002	0.0004772
94	1	1	95	95	(1313.735403943475, 'Miss', 'Miss')	300	1316.24	0	1317.24	1320.29	right	0.0529443	0	45	1	1	80	1	sub-1	0.132571	FALSE	0.0593011	0.460749	-3.20683	0	0	1	0.397959	1.32931	1.72586	0.000455447
95	1	1	96	96	(1323.2873395331235, 'Miss', 'Miss')	336	1326.09	1	1327.09	1330.69	left	0.603364	45	45	0	1	20	0	sub-1	0.08	FALSE	0.330683	1.68184	-2.12058	0	0	3	0.10101	3.30743	1.74105	0.000589392
96	1	1	97	97	(1333.6894561950467, 'Miss', 'Miss')	348	1336.59	1	1337.59	1340.94	right	0.353682	45	315	1	1	80	0	sub-1	0.266857	FALSE	4.76083	-3.67107	2.89042	0	0	2	0.39	1.35845	1.73715	0.000586462
97	1	1	98	98	(1343.9414887153716, 'Miss', 'Miss')	312	1346.54	1	1347.54	1357.01	left	6.47155	45	315	1	1	80	1	sub-1	0.285714	FALSE	5.74593	-0.221676	-5.33875	0	0	2	0.39604	1.33628	1.73311	0.000432232
98	1	1	99	99	(1360.011459680556, 'Miss', 'Miss')	360	1363.01	1	1364.01	1367.28	right	0.270911	0	315	0	1	20	0	sub-1	0.490286	TRUE	2.40404	0.97434	-6.88507	0	0	0	0.0980392	3.3505	1.74821	0.000576189
99	1	1	100	100	(1370.280150461711, 'Miss', 'Miss')	324	1372.98	0	1373.98	1377.2	right	0.220768	0	45	1	1	80	1	sub-1	0	FALSE	-0.777839	-0.983863	-4.57459	0	0	1	0.38835	1.36457	1.74441	0.000573307
100	1	2	101	1	(1573.47241387346, 'Miss', 'Miss')	384	1576.67	1	1577.67	1581.47	right	0.804994	45	45	0	1	20	1	sub-1	0.117143	FALSE	0.234783	-2.90922	5.06226	0	0	3	0.105769	3.24101	1.75813	0.000511685
101	1	2	102	2	(1584.4735160645814, 'Miss', 'Miss')	372	1587.57	0	1588.57	1592.34	left	0.770066	45	315	1	1	80	1	sub-1	0.118857	FALSE	0.802255	-2.33417	1.46295	0	0	2	0.390476	1.35669	1.75424	0.000505284
102	1	2	103	3	(1595.342359759843, 'Miss', 'Miss')	408	1598.74	1	1599.74	1602.94	right	0.203462	45	315	1	1	80	0	sub-1	0.115429	FALSE	0.14364	1.84821	-2.80967	0	0	2	0.396226	1.3356	1.75023	0.000392066
103	1	2	104	4	(1605.9445101005986, 'Miss', 'Miss')	312	1608.54	0	1609.54	1612.71	left	0.169898	0	45	1	1	80	0	sub-1	0.110857	FALSE	2.78334	-1.20039	1.87709	0	0	1	0.383178	1.38391	1.74674	6.89046e-05
104	1	2	105	5	(1615.7131515009278, 'Miss', 'Miss')	408	1619.11	1	1620.11	1623.21	right	0.103581	0	45	1	1	80	1	sub-1	0	FALSE	-0.638862	0.355071	-0.488582	0	0	1	0.388889	1.36257	1.74312	0.000389526
105	1	2	106	6	(1626.215270715118, 'Miss', 'Miss')	312	1628.82	1	1629.82	1633.08	left	0.269973	45	315	1	1	80	1	sub-1	0.111429	FALSE	-4.71169	-6.49688	1.75819	0	0	2	0.394495	1.34192	1.73938	6.48549e-05
106	1	2	107	7	(1636.0839526743048, 'Miss', 'Miss')	324	1638.78	0	1639.78	1647.47	left	4.68734	45	315	1	1	80	1	sub-1	0	FALSE	-0.263709	0.137415	-2.93162	0	0	2	0.4	1.32193	1.73553	0.000358327
107	1	2	108	8	(1650.4701592781303, 'Miss', 'Miss')	408	1653.87	1	1654.87	1658.19	left	0.321344	45	315	1	1	80	1	sub-1	0.112571	FALSE	0.878425	-1.56169	-3.13365	0	0	2	0.405405	1.30256	1.73158	0.000344037
108	1	2	109	9	(1661.18905171615, 'Miss', 'Miss')	408	1664.59	1	1665.59	1675.81	left	7.22135	45	315	1	1	80	1	sub-1	0.115429	FALSE	2.32941	-1.04781	-2.92477	1	1	2	0.410714	1.28379	1.72754	0.000330537
109	1	2	110	10	(1678.8092682261022, 'Miss', 'Miss')	348	1681.71	1	1682.71	1685.98	right	0.269645	0	45	1	1	80	1	sub-1	0.117143	FALSE	2.55711	5.80456	-7.94696	0	0	1	0.380531	1.39391	1.72452	5.79439e-05
110	1	2	111	11	(1688.977988080912, 'Miss', 'Miss')	384	1692.18	1	1693.18	1696.45	right	0.27126	0	45	1	1	80	1	sub-1	0	FALSE	-3.68215	-6.87354	4.86713	0	0	1	0.385965	1.37346	1.72138	0.000353915
111	1	2	112	12	(1699.446827670352, 'Miss', 'Miss')	384	1702.65	0	1703.65	1706.81	left	0.169755	45	45	0	1	20	0	sub-1	0.107429	FALSE	3.267	3.0526	-2.62173	0	0	3	0.104348	3.26053	1.7342	0.000427729
112	1	2	113	13	(1709.8155703845987, 'Miss', 'Miss')	360	1712.82	1	1713.82	1717	right	0.187528	0	45	1	1	80	1	sub-1	0	FALSE	-2.40696	-2.51671	0.0200082	0	0	1	0.387931	1.36613	1.73097	0.000422864
113	1	2	114	14	(1720.0009615389954, 'Miss', 'Miss')	348	1722.9	0	1723.9	1727.29	right	0.387564	0	45	1	1	80	1	sub-1	0.116	FALSE	-0.616702	1.26772	-0.0637769	0	0	1	0.393162	1.3468	1.72764	0.000325916
114	1	2	115	15	(1730.2863424843217, 'Miss', 'Miss')	372	1733.39	1	1734.39	1738.72	left	1.33833	45	45	0	1	20	0	sub-1	0	FALSE	-1.82005	-4.9351	5.23772	0	0	3	0.110169	3.1822	1.73946	0.000379536
115	1	2	116	16	(1741.721993997733, 'Miss', 'Miss')	348	1744.62	0	1745.62	1748.81	right	0.188134	0	45	1	1	80	1	sub-1	0.109143	FALSE	0.066849	-0.0424254	-0.271621	0	0	1	0.394958	1.34023	1.73605	0.000375354
116	1	2	117	17	(1751.8073989676632, 'Miss', 'Miss')	348	1754.71	0	1755.71	1759.59	left	0.887095	45	315	1	1	80	1	sub-1	0.248	FALSE	0.365563	-1.60542	-0.548673	0	0	2	0.391667	1.3523	1.7328	5.26278e-05
117	1	2	118	18	(1762.5929136296072, 'Miss', 'Miss')	396	1765.89	0	1766.89	1776.2	left	6.30548	45	315	1	1	80	1	sub-1	0.109714	FALSE	-3.27604	-0.182986	-1.66038	0	0	2	0.396694	1.3339	1.72946	0.000300214
118	1	2	119	19	(1779.196262703772, 'Miss', 'Miss')	300	1781.7	1	1782.7	1786.9	left	1.20463	45	315	1	1	80	1	sub-1	0.110286	FALSE	3.00369	-1.30733	-0.296602	0	0	2	0.401639	1.31603	1.72603	0.000289256
119	1	2	120	20	(1789.8984072741841, 'Miss', 'Miss')	336	1792.7	0	1793.7	1797.02	right	0.319798	0	45	1	1	80	1	sub-1	0.110286	FALSE	6.4185	8.95144	-7.87806	0	0	1	0.390244	1.35755	1.72298	4.85845e-05
120	1	2	121	21	(1800.0171304302958, 'Miss', 'Miss')	396	1803.32	0	1804.32	1807.62	left	0.303231	45	315	1	1	80	1	sub-1	0.117143	FALSE	-2.70466	-1.66857	2.50893	0	0	2	0.403226	1.31034	1.71961	4.73934e-05
121	1	2	122	22	(1810.6192999130562, 'Miss', 'Miss')	324	1813.32	0	1814.32	1822.79	right	5.47239	0	45	1	1	80	1	sub-1	0.116571	FALSE	-4.43512	0.0694884	-0.103619	0	0	1	0.392	1.35107	1.71662	4.61015e-05
122	1	2	123	23	(1825.789054268418, 'Miss', 'Miss')	348	1828.69	1	1829.69	1832.87	right	0.186959	0	315	0	1	20	0	sub-1	0.116	FALSE	0.777863	-1.97384	-0.531225	0	0	0	0.0873016	3.51785	1.73035	0.000435723
123	1	2	124	24	(1835.8743937671416, 'Miss', 'Miss')	372	1838.97	0	1839.97	1843.14	left	0.169887	45	315	1	1	80	1	sub-1	0.114857	FALSE	-2.47848	-1.85756	1.78327	0	0	2	0.401575	1.31626	1.72705	0.000429284
124	1	2	125	25	(1846.1431422517326, 'Miss', 'Miss')	312	1848.74	0	1849.74	1853.03	right	0.287724	0	45	1	1	80	1	sub-1	0.112	FALSE	-0.174187	-3.19143	-0.0902815	0	0	1	0.390625	1.35614	1.7241	4.48292e-05
125	1	2	126	26	(1856.0284683233103, 'Miss', 'Miss')	324	1858.73	0	1859.73	1862.86	left	0.13773	45	45	0	1	20	0	sub-1	0.116	FALSE	-3.04971	-2.90707	-1.3906	0	0	3	0.108527	3.20387	1.73514	0.000324971
126	1	2	127	27	(1865.86383487052, 'Miss', 'Miss')	384	1869.06	0	1870.06	1873.18	right	0.119622	45	315	1	1	80	0	sub-1	0.237714	FALSE	2.61869	0.543193	-1.70773	0	0	2	0.4	1.32193	1.73192	0.000319629
127	1	2	128	28	(1876.1825684021533, 'Miss', 'Miss')	384	1879.38	1	1880.38	1883.73	right	0.354239	0	45	1	1	80	1	sub-1	0	FALSE	3.87978	1.77772	-1.12113	0	0	1	0.389313	1.361	1.72905	4.35921e-05
128	1	2	129	29	(1886.7346815408373, 'Miss', 'Miss')	396	1890.04	0	1891.04	1894.27	left	0.23643	45	45	0	1	20	0	sub-1	0.110286	FALSE	-3.84933	-2.73159	-0.128793	0	0	3	0.113636	3.1375	1.73933	0.000294687
129	1	2	130	30	(1897.2702118770321, 'Miss', 'Miss')	384	1900.47	1	1901.47	1904.89	right	0.421395	45	315	1	1	80	0	sub-1	0.116571	FALSE	1.6296	0.192593	0.0806318	0	0	2	0.398496	1.32736	1.73619	0.000289787
130	1	2	131	31	(1907.8889719300523, 'Miss', 'Miss')	360	1910.89	0	1911.89	1915.02	right	0.137991	0	315	0	1	20	0	sub-1	0.116571	FALSE	-0.389759	0.540551	-1.07275	0	0	0	0.0895522	3.48113	1.74872	0.000373686
131	1	2	132	32	(1918.0243711018975, 'Miss', 'Miss')	384	1921.22	0	1922.22	1925.53	left	0.304922	0	45	1	1	80	0	sub-1	0.115429	FALSE	2.02445	-0.683387	-0.866525	0	0	1	0.385185	1.37638	1.74592	0.000374017
132	1	2	133	33	(1928.526510845195, 'Miss', 'Miss')	324	1931.23	0	1932.23	1935.36	right	0.137299	0	45	1	1	80	1	sub-1	0.122857	FALSE	-3.97146	2.54072	-1.23715	0	0	1	0.389706	1.35954	1.74304	0.000244684
133	1	2	134	34	(1938.3618371664506, 'Miss', 'Miss')	396	1941.66	0	1942.66	1945.75	right	0.088142	0	45	1	1	80	1	sub-1	0.118286	FALSE	-3.81177	-2.12577	2.89059	0	0	1	0.394161	1.34314	1.74009	0.00023664
134	1	2	135	35	(1948.7472858578312, 'Miss', 'Miss')	408	1952.15	1	1953.15	1956.82	right	0.670091	0	315	0	1	20	0	sub-1	0.119429	FALSE	-2.30439	3.25885	-2.04064	0	0	0	0.0942029	3.40808	1.75173	0.000334064
135	1	2	136	36	(1959.8161787674662, 'Miss', 'Miss')	360	1962.82	0	1963.82	1967.42	right	0.603564	45	315	1	1	80	0	sub-1	0	FALSE	-0.360891	-5.22501	-2.45103	0	0	2	0.388489	1.36405	1.74891	0.000332758
136	1	2	137	37	(1970.4183485276471, 'Miss', 'Miss')	384	1973.62	0	1974.62	1978.04	right	0.420668	0	315	0	1	20	0	sub-1	0.124	FALSE	2.27068	1.87175	-3.63216	0	0	0	0.1	3.32193	1.75974	0.000304662
137	1	2	138	38	(1981.0371094129287, 'Miss', 'Miss')	384	1984.24	1	1985.24	1988.42	right	0.186293	0	45	1	1	80	1	sub-1	0.120571	FALSE	-2.20918	-1.78255	3.92006	0	0	1	0.390071	1.35819	1.75686	0.000301861
138	1	2	139	39	(1991.4226033238292, 'Miss', 'Miss')	300	1993.92	0	1994.92	1998.22	left	0.303418	0	45	1	1	80	0	sub-1	0.330857	FALSE	3.37835	0.730293	-0.195741	0	0	1	0.394366	1.34239	1.75391	0.000220066
139	1	2	140	40	(2001.2246172847317, 'Miss', 'Miss')	372	2004.32	0	2005.33	2008.51	right	0.18664	0	45	1	1	80	1	sub-1	0.122286	FALSE	3.05868	0.613144	-2.1727	0	0	1	0.398601	1.32698	1.75089	0.000213175
140	1	2	141	41	(2011.5100220882096, 'Miss', 'Miss')	312	2014.11	0	2015.11	2018.41	right	0.303776	45	45	0	1	20	1	sub-1	0.118857	FALSE	-4.72434	-5.1065	5.16051	0	0	3	0.111111	3.16993	1.76041	0.000252903
141	1	2	142	42	(2021.4119822850453, 'Miss', 'Miss')	336	2024.21	0	2025.21	2032.18	left	3.97085	0	45	1	1	80	0	sub-1	0.233714	FALSE	5.41665	6.12579	-8.08653	0	0	1	0.4	1.32193	1.75735	0.000250645
142	1	2	143	43	(2035.1814964498517, 'Miss', 'Miss')	300	2037.68	0	2038.68	2041.93	right	0.252874	0	315	0	1	20	0	sub-1	0.124	FALSE	-4.70004	-3.79923	5.14293	0	0	0	0.10274	3.28293	1.76744	0.000269478
143	1	2	144	44	(2044.9333849890063, 'Miss', 'Miss')	348	2047.83	0	2048.83	2052.7	right	0.870153	45	315	1	1	80	0	sub-1	0	FALSE	-0.795659	0.174341	1.61544	0	0	2	0.37415	1.41831	1.76503	0.0002731
144	1	2	145	45	(2055.702316016199, 'Miss', 'Miss')	360	2058.7	0	2059.7	2068	left	5.3044	45	315	1	1	80	1	sub-1	0.121143	FALSE	-1.49113	2.61845	-0.954801	0	0	2	0.378378	1.4021	1.76254	0.000216758
145	1	2	146	46	(2071.005413026218, 'Miss', 'Miss')	324	2073.71	1	2074.71	2078.81	left	1.10372	45	315	1	1	80	1	sub-1	0.120571	FALSE	0.133576	-0.31721	0.101973	0	0	2	0.38255	1.38628	1.75998	0.00021009
146	1	2	147	47	(2081.8075784586417, 'Miss', 'Miss')	324	2084.51	0	2085.51	2088.68	left	0.17094	45	315	1	1	80	1	sub-1	0.08	FALSE	-1.59729	-2.87517	0.908329	0	0	2	0.386667	1.37084	1.75735	0.000203709
147	1	2	148	48	(2091.676224908021, 'Miss', 'Miss')	396	2094.98	0	2095.98	2099.08	left	0.103383	45	45	0	1	20	0	sub-1	0.122857	FALSE	2.26013	-0.869899	-4.27608	0	0	3	0.112583	3.15094	1.76628	0.000229204
148	1	2	149	49	(2102.0784006604827, 'Miss', 'Miss')	300	2104.58	1	2105.58	2108.78	left	0.203887	45	315	1	1	80	1	sub-1	0.124	FALSE	-4.12961	-1.62654	0.446193	0	0	2	0.388158	1.36528	1.76361	0.000227169
149	1	2	150	50	(2111.7803249591225, 'Miss', 'Miss')	360	2114.78	1	2115.78	2118.93	right	0.153205	0	45	1	1	80	1	sub-1	0.197143	FALSE	0.558516	0.330792	-0.108046	0	0	1	0.385621	1.37474	1.76104	3.51646e-05
150	1	2	151	51	(2121.93239986928, 'Miss', 'Miss')	360	2124.93	1	2125.93	2129.38	left	0.454564	45	45	0	1	20	0	sub-1	0.124571	FALSE	-0.522124	5.16647	-1.54779	0	0	3	0.116883	3.09686	1.76943	0.000211183
151	1	2	152	52	(2132.3844965846783, 'Miss', 'Miss')	336	2135.18	1	2136.18	2139.2	right	0.0198655	45	315	1	1	80	0	sub-1	0.116571	FALSE	1.69227	-0.0185511	-3.05425	0	0	2	0.387097	1.36923	1.76682	0.000209315
152	1	2	153	53	(2142.2031649225246, 'Miss', 'Miss')	324	2144.9	0	2145.9	2149.34	right	0.436652	0	45	1	1	80	1	sub-1	0.121714	FALSE	3.70638	7.29626	-5.45614	0	0	1	0.384615	1.37851	1.7643	3.42457e-05
153	1	2	154	54	(2152.3385998815975, 'Miss', 'Miss')	372	2155.44	1	2156.44	2159.82	right	0.386537	0	45	1	1	80	1	sub-1	0	FALSE	1.41226	2.62199	-2.36225	0	0	1	0.388535	1.36388	1.76172	0.000184473
154	1	2	155	55	(2162.8240294864563, 'Miss', 'Miss')	396	2166.12	0	2167.12	2170.16	right	0.0373727	0	45	1	1	80	1	sub-1	0.258857	FALSE	-0.221053	1.07112	-3.75164	0	0	1	0.392405	1.34958	1.75908	0.000179196
155	1	2	156	56	(2173.1594823114, 'Miss', 'Miss')	384	2176.36	0	2177.36	2180.39	left	0.0373757	45	315	1	1	80	1	sub-1	0.121143	FALSE	-3.29566	-0.219684	1.87703	0	0	2	0.383648	1.38215	1.75668	3.21779e-05
156	1	2	157	57	(2183.394893745225, 'Miss', 'Miss')	396	2186.7	1	2187.7	2191.06	right	0.370323	0	45	1	1	80	1	sub-1	0	FALSE	-3.28202	-5.08737	2.41736	0	0	1	0.39375	1.34465	1.75408	3.15505e-05
157	1	2	158	58	(2194.063667697006, 'Miss', 'Miss')	360	2197.06	1	2198.06	2201.76	left	0.703898	45	315	1	1	80	1	sub-1	0.115429	FALSE	1.03666	-3.84598	-0.740037	0	0	2	0.385093	1.37672	1.75171	3.08853e-05
158	1	2	159	59	(2204.7658502740087, 'Miss', 'Miss')	396	2208.07	0	2209.07	2212.45	right	0.387047	0	45	1	1	80	1	sub-1	0.124	FALSE	-0.964082	1.22413	-2.0633	0	0	1	0.395062	1.33985	1.74914	3.02912e-05
159	1	2	160	60	(2215.451334086807, 'Miss', 'Miss')	312	2218.05	1	2219.05	2222.42	left	0.371036	45	315	1	1	80	1	sub-1	0	FALSE	-1.20507	-0.801796	3.30686	0	0	2	0.386503	1.37145	1.74679	2.96613e-05
160	1	2	161	61	(2225.4200122175935, 'Miss', 'Miss')	324	2228.12	1	2229.12	2232.57	right	0.453669	0	45	1	1	80	1	sub-1	0.120571	FALSE	-3.32825	6.07218	2.76861	0	0	1	0.396341	1.33518	1.74426	2.90983e-05
161	1	2	162	62	(2235.572082134184, 'Miss', 'Miss')	360	2238.57	1	2239.57	2243.16	left	0.587929	45	45	0	1	20	0	sub-1	0.118857	FALSE	-2.11075	1.35776	2.48255	0	0	3	0.115152	3.11839	1.75234	0.000185753
162	1	2	163	63	(2246.1576152723246, 'Miss', 'Miss')	360	2249.16	1	2250.16	2254.14	left	0.987815	45	45	0	1	20	0	sub-1	0.304571	FALSE	1.86895	10.6616	-6.8432	0	0	3	0.120482	3.05311	1.75994	0.000774737
163	1	2	164	64	(2257.1431597292158, 'Miss', 'Miss')	384	2260.34	1	2261.34	2264.48	right	0.13764	0	45	1	1	80	1	sub-1	0.118286	FALSE	-0.851378	-0.766113	-0.794547	0	0	1	0.39521	1.33931	1.7574	0.000172876
164	1	2	165	65	(2267.4785623410726, 'Miss', 'Miss')	408	2270.88	1	2271.88	2275.25	right	0.370525	0	45	1	1	80	1	sub-1	0.241714	FALSE	0.420604	-0.587267	-2.0323	0	0	1	0.39881	1.32623	1.75481	0.000154283
165	1	2	166	66	(2278.2474204067094, 'Miss', 'Miss')	312	2280.85	1	2281.85	2285.22	right	0.371282	0	315	0	1	20	0	sub-1	0.262286	FALSE	1.05691	5.1862	-5.25468	0	0	0	0.0946746	3.40088	1.76426	0.000222231
166	1	2	167	67	(2288.2161151827177, 'Miss', 'Miss')	396	2291.52	0	2292.52	2295.93	right	0.419703	45	315	1	1	80	0	sub-1	0.120571	FALSE	0.0989513	-3.66418	4.0182	0	0	2	0.376471	1.40939	1.76214	0.000224443
167	1	2	168	68	(2298.9349557431287, 'Miss', 'Miss')	324	2301.64	1	2302.64	2306.25	right	0.621385	45	315	1	1	80	0	sub-1	0.121714	FALSE	4.50183	-2.14469	-3.85613	0	0	2	0.380117	1.39548	1.75997	0.000161134
168	1	2	169	69	(2309.253678732788, 'Miss', 'Miss')	408	2312.65	0	2313.65	2316.7	right	0.0537244	0	45	1	1	80	1	sub-1	0.123429	FALSE	-0.87828	1.10716	-0.93702	0	0	1	0.395349	1.3388	1.7575	2.76843e-05
169	1	2	170	70	(2319.7058217773883, 'Miss', 'Miss')	372	2322.81	1	2323.81	2327.96	left	1.15511	45	315	1	1	80	1	sub-1	0.122286	FALSE	0.894634	2.79522	1.22064	0	0	2	0.381503	1.39023	1.75535	2.7128e-05
170	1	2	171	71	(2330.9580787307905, 'Miss', 'Miss')	396	2334.26	0	2335.26	2344.58	right	6.32174	0	45	1	1	80	1	sub-1	0.118286	FALSE	0.494887	2.79021	-3.95955	0	0	1	0.396552	1.33442	1.75291	2.66528e-05
171	1	2	172	72	(2347.578175949985, 'Miss', 'Miss')	312	2350.18	1	2351.18	2354.61	right	0.437222	0	45	1	1	80	1	sub-1	0.124	FALSE	0.821394	0.724889	-1.46782	0	0	1	0.4	1.32193	1.75042	0.000141474
172	1	2	173	73	(2357.6135287371435, 'Miss', 'Miss')	384	2360.81	0	2361.81	2364.95	left	0.138105	45	315	1	1	80	1	sub-1	0	FALSE	-2.5167	0.969704	0.629597	0	0	2	0.380682	1.39334	1.74837	2.56721e-05
173	1	2	174	74	(2367.9489282973773, 'Miss', 'Miss')	384	2371.15	1	2372.15	2375.62	right	0.470119	0	45	1	1	80	1	sub-1	0	FALSE	-1.9779	-1.96395	0.659346	0	0	1	0.40113	1.31786	1.74592	2.52425e-05
174	1	2	175	75	(2378.617762171957, 'Miss', 'Miss')	360	2381.62	1	2382.62	2385.85	left	0.237696	45	315	1	1	80	1	sub-1	0.116571	FALSE	-3.08152	0.899994	2.4788	0	0	2	0.382022	1.38827	1.74388	2.47391e-05
175	1	2	176	76	(2388.8531930252075, 'Miss', 'Miss')	360	2391.85	1	2392.85	2396	left	0.153711	45	315	1	1	80	1	sub-1	0.126857	FALSE	1.12422	-1.30857	-2.55133	0	0	2	0.385475	1.37529	1.7418	0.000143736
176	1	2	177	77	(2399.0052282642528, 'Miss', 'Miss')	396	2402.31	1	2403.31	2406.57	left	0.269845	45	315	1	1	80	1	sub-1	0.127429	FALSE	-0.182168	-0.218489	-0.634607	0	0	2	0.388889	1.36257	1.73967	0.000140106
177	1	2	178	78	(2409.5740801156726, 'Miss', 'Miss')	312	2412.17	1	2413.17	2416.31	right	0.137678	0	45	1	1	80	1	sub-1	0.245714	FALSE	0.129176	-2.1962	0.736774	0	0	1	0.39779	1.32992	1.73738	2.33956e-05
178	1	2	179	79	(2419.309393897528, 'Miss', 'Miss')	360	2422.31	0	2423.31	2432.46	right	6.15425	0	315	0	1	20	0	sub-1	0.125714	FALSE	-1.04669	-3.60011	0.48154	0	0	0	0.0934066	3.42033	1.74637	0.000195156
179	1	2	180	80	(2435.462657831383, 'Miss', 'Miss')	300	2437.96	0	2438.96	2451.93	left	9.9719	45	315	1	1	80	1	sub-1	0.350286	FALSE	-0.475353	-2.95446	3.38798	1	1	2	0.387978	1.36595	1.74427	0.000195328
180	1	2	181	81	(2454.9332698595526, 'Miss', 'Miss')	384	2458.13	0	2459.13	2468.44	left	6.30511	45	315	1	1	80	1	sub-1	0.122857	FALSE	0.897431	0.139684	-4.05951	0	0	2	0.391304	1.35364	1.74213	0.000132719
181	1	2	182	82	(2471.436580871644, 'Miss', 'Miss')	324	2474.14	1	2475.14	2478.29	right	0.154291	0	45	1	1	80	1	sub-1	0.127429	FALSE	-1.75865	-4.89677	3.07645	0	0	1	0.394595	1.34156	1.73994	2.24965e-05
182	1	2	183	83	(2481.2886181635995, 'Miss', 'Miss')	348	2484.19	1	2485.19	2488.26	right	0.0695901	0	315	0	1	20	0	sub-1	0.240571	FALSE	-0.0125742	-1.07681	0.116606	0	0	0	0.0967742	3.36923	1.74847	0.000179939
183	1	2	184	84	(2491.2573562171847, 'Miss', 'Miss')	312	2493.86	1	2494.86	2498.06	left	0.203385	0	315	0	1	20	1	sub-1	0.122857	FALSE	0.240126	3.36479	0.756706	0	0	0	0.101604	3.29897	1.75654	0.000740501
184	1	2	185	85	(2501.0593313392355, 'Miss', 'Miss')	396	2504.36	0	2505.36	2514.21	left	5.85536	45	315	1	1	80	1	sub-1	0.132571	FALSE	-0.295639	-7.18795	2.20439	0	0	2	0.388298	1.36476	1.75443	0.000168138
185	1	2	186	86	(2517.212557821341, 'Miss', 'Miss')	336	2520.01	0	2521.01	2529.63	right	5.62114	0	315	0	1	20	0	sub-1	0.128571	FALSE	-0.245292	0.797348	-2.21693	0	0	0	0.10582	3.24031	1.76208	0.00015802
186	1	2	187	87	(2532.632352818785, 'Miss', 'Miss')	324	2535.33	0	2536.33	2539.48	left	0.154815	45	315	1	1	80	1	sub-1	0.131429	FALSE	-3.0597	-1.64065	0.632641	0	0	2	0.389474	1.3604	1.75995	0.000156922
187	1	2	188	88	(2542.4843368460306, 'Miss', 'Miss')	384	2545.68	1	2546.68	2550.14	right	0.453109	0	45	1	1	80	1	sub-1	0.120571	FALSE	1.83073	3.24897	-2.92191	0	0	1	0.387435	1.36798	1.75788	2.22677e-05
188	1	2	189	89	(2553.1365318792077, 'Miss', 'Miss')	408	2556.54	0	2557.54	2561.19	left	0.653257	0	45	1	1	80	0	sub-1	0.318286	FALSE	0.181288	0.44366	-1.54883	0	0	1	0.390625	1.35614	1.75577	0.000122232
189	1	2	190	90	(2564.1887249149577, 'Miss', 'Miss')	384	2567.39	1	2568.39	2572.54	right	1.15325	0	45	1	1	80	1	sub-1	0.245714	FALSE	3.06646	1.73285	1.54378	0	0	1	0.393782	1.34453	1.75362	0.000119372
190	1	2	191	91	(2575.541085401642, 'Miss', 'Miss')	324	2578.24	1	2579.24	2582.38	left	0.136514	45	315	1	1	80	1	sub-1	0.251429	FALSE	0.391669	-7.09447	3.38352	0	0	2	0.386598	1.37109	1.75163	2.11627e-05
191	1	2	192	92	(2585.37639147121, 'Miss', 'Miss')	348	2588.28	0	2589.28	2592.58	left	0.30352	45	315	1	1	80	1	sub-1	0.128571	FALSE	-3.07004	-4.39427	3.341	0	0	2	0.389744	1.3594	1.7496	0.000118939
192	1	2	193	93	(2595.5784686284724, 'Miss', 'Miss')	300	2598.08	1	2599.08	2602.68	right	0.604011	0	45	1	1	80	1	sub-1	0.256	FALSE	0.87911	4.05752	-2.13103	0	0	1	0.392857	1.34792	1.74753	2.04638e-05
193	1	2	194	94	(2605.6805046720374, 'Miss', 'Miss')	312	2608.28	1	2609.28	2612.68	right	0.403347	0	45	1	1	80	1	sub-1	0.130857	FALSE	-1.06618	-3.8659	-2.2914	0	0	1	0.395939	1.33665	1.74542	0.000113539
194	1	2	195	95	(2615.6825933699865, 'Miss', 'Miss')	396	2618.98	1	2619.98	2623.68	left	0.704421	45	315	1	1	80	1	sub-1	0.126857	FALSE	2.90288	1.89612	-0.486208	0	0	2	0.388889	1.36257	1.74347	1.97955e-05
195	1	2	196	96	(2626.6848202232786, 'Miss', 'Miss')	348	2629.59	0	2630.59	2633.89	right	0.303681	0	45	1	1	80	1	sub-1	0.125714	FALSE	-2.56645	-3.65187	3.19468	0	0	1	0.396985	1.33284	1.74139	1.94835e-05
196	1	2	197	97	(2636.8868660320395, 'Miss', 'Miss')	396	2640.19	0	2641.19	2649.56	left	5.37163	45	315	1	1	80	1	sub-1	0.129143	FALSE	2.51442	3.83153	-4.65468	0	0	2	0.39	1.35845	1.73946	1.9156e-05
197	1	2	198	98	(2652.556714432906, 'Miss', 'Miss')	384	2655.76	1	2656.76	2660.12	left	0.371139	45	315	1	1	80	1	sub-1	0.129714	FALSE	-1.12057	-5.96672	-0.292939	0	0	2	0.393035	1.34727	1.73749	0.0001104
198	1	2	199	99	(2663.1255121873537, 'Miss', 'Miss')	396	2666.43	0	2667.43	2670.56	right	0.137627	0	45	1	1	80	1	sub-1	0.126286	FALSE	-1.8935	-2.02166	-2.79425	0	0	1	0.39604	1.33628	1.73549	1.85439e-05
199	1	2	200	100	(2673.56096340326, 'Miss', 'Miss')	408	2676.96	1	2677.96	2681.35	left	0.387588	45	315	1	1	80	1	sub-1	0.125143	FALSE	1.56389	1.99256	-1.0156	0	0	2	0.394089	1.34341	1.73354	1.82442e-05
200	1	1	1	1	(81.16302764113243, 'Miss', 'Miss')	336	83.9661	1	84.9663	91.3343	right	3.37084	0	45	0	1	20	1	sub-4	0.0314286	FALSE	-8.78048	-4.41612	5.71893	0	0	1	0.25	2	1.92193	0.0780719
201	1	1	2	2	(94.33522460570111, 'Miss', 'Miss')	336	97.1355	0	98.1357	102.47	left	1.33679	45	45	1	1	80	0	sub-4	0.117714	FALSE	-3.12739	3.25327	0.669183	0	0	3	0.2	2.32193	1.9183	0.0817042
202	1	1	3	3	(105.4708194576524, 'Miss', 'Miss')	300	107.971	1	108.971	112.672	left	0.704647	45	315	0	1	20	1	sub-4	0.113714	FALSE	-0.000955662	-4.37369	-0.219718	0	0	2	0.166667	2.58496	1.95021	0.0860017
203	1	1	4	4	(115.67288274962084, 'Miss', 'Miss')	336	118.473	0	119.473	122.924	left	0.453924	0	315	1	1	80	1	sub-4	0.130857	FALSE	-0.0577439	-24.8014	4.47029	0	0	0	0.142857	2.80735	2	0.0849625
204	1	1	5	5	(125.92498310505198, 'Miss', 'Miss')	300	128.425	0	129.425	133.293	left	0.870278	45	45	1	1	80	0	sub-4	0.120571	FALSE	8.50766	-12.3242	0.150999	0	0	3	0.25	2	1.97494	0.0546396
205	1	1	6	6	(136.2937601328067, 'Miss', 'Miss')	384	139.494	0	140.494	143.828	left	0.336584	45	45	1	1	80	0	sub-4	0.117714	FALSE	5.38995	3.58545	-2.82276	0	0	3	0.333333	1.58496	1.92193	0.0780719
206	1	1	7	7	(146.82929334178152, 'Miss', 'Miss')	312	149.429	1	150.43	153.68	left	0.254681	45	45	1	1	80	0	sub-4	0	FALSE	3.84711	10.3598	-0.866463	0	0	3	0.4	1.32193	1.85856	0.0454777
207	1	1	8	8	(156.68132495225564, 'Miss', 'Miss')	372	159.782	1	160.782	173.984	right	10.2064	0	315	1	1	80	0	sub-4	0.120571	FALSE	-2.5429	-15.4986	4.27068	1	1	0	0.181818	2.45943	1.88792	0.0173429
208	1	1	9	9	(176.9854728421342, 'Miss', 'Miss')	312	179.586	1	180.586	184.287	left	0.703728	45	45	1	1	80	0	sub-4	0	FALSE	7.74937	-1.19154	1.89514	0	0	3	0.416667	1.26303	1.83393	0.0153837
209	1	1	10	10	(187.28755560906757, 'Miss', 'Miss')	384	190.488	1	191.488	195.072	right	0.586856	45	45	1	1	80	1	sub-4	0	FALSE	-2.79902	0.553442	5.02661	0	0	3	0.461538	1.11548	1.77833	0.020321
210	1	1	11	11	(198.07308049540734, 'Miss', 'Miss')	372	201.173	0	202.174	205.191	left	0.0207209	45	45	1	1	80	0	sub-4	0.0765714	FALSE	12.4715	4.00588	-0.952147	0	0	3	0.5	1	1.72323	0.0149025
211	1	1	12	12	(208.19181951646533, 'Miss', 'Miss')	408	211.592	1	212.592	221.061	right	5.4719	45	45	1	1	80	1	sub-4	0.233714	FALSE	5.65533	2.93845	-3.78937	1	1	3	0.533333	0.906891	1.66974	0.0113006
212	1	1	13	13	(224.06176504205177, 'Miss', 'Miss')	372	227.162	1	228.162	231.63	right	0.471438	45	315	0	1	20	0	sub-4	0.102286	FALSE	1.4353	4.51721	1.95931	0	0	2	0.125	3	1.73222	0.0126167
213	1	1	14	14	(234.6305441227214, 'Miss', 'Miss')	324	237.331	1	238.331	241.548	right	0.221081	0	315	1	1	80	0	sub-4	0.0342857	FALSE	5.16981	-4.66984	2.48092	0	0	0	0.176471	2.5025	1.76525	0.0197993
214	1	1	15	15	(244.5492561229621, 'Miss', 'Miss')	408	247.95	0	248.95	252.751	right	0.803708	45	45	1	1	80	1	sub-4	0.245714	FALSE	-3.74943	-26.3332	9.44612	0	0	3	0.5	1	1.72297	0.00691327
215	1	1	16	16	(255.75155993905537, 'Miss', 'Miss')	408	259.152	1	260.152	263.586	left	0.436621	0	315	1	1	80	1	sub-4	0.131429	FALSE	-4.96015	2.97637	-4.32993	0	0	0	0.210526	2.24793	1.74274	0.00448048
216	1	1	17	17	(266.5871088500662, 'Miss', 'Miss')	372	269.687	1	270.688	277.239	left	3.55548	0	315	1	1	80	1	sub-4	0.243429	FALSE	10.1798	7.51555	-17.3017	0	0	0	0.25	2	1.75022	0.0227422
217	1	1	18	18	(280.2398680252154, 'Miss', 'Miss')	300	282.74	0	283.74	287.624	right	0.887175	45	45	1	1	80	1	sub-4	0.248	FALSE	3.76838	-6.16367	2.07651	0	0	3	0.47619	1.07039	1.71769	0.00298489
218	1	1	19	19	(290.6254109994152, 'Miss', 'Miss')	300	293.126	1	294.126	297.843	left	0.720072	0	315	1	1	80	1	sub-4	0.328571	FALSE	-17.6333	-30.6165	6.26757	0	0	0	0.272727	1.87447	1.72095	0.00220267
219	1	1	20	20	(300.84408710135904, 'Miss', 'Miss')	312	303.444	0	304.444	308.362	left	0.92069	0	315	1	1	80	1	sub-4	0.132	FALSE	2.06021	13.78	1.57975	0	0	0	0.304348	1.71621	1.71794	0.012815
220	1	1	21	21	(311.3629054093781, 'Miss', 'Miss')	372	314.463	1	315.463	318.964	right	0.504094	45	45	1	1	80	1	sub-4	0.125143	FALSE	6.38443	10.1246	-0.390885	0	0	3	0.458333	1.12553	1.69288	0.00160701
221	1	1	22	22	(321.965046878624, 'Miss', 'Miss')	360	324.965	1	325.966	329.533	left	0.570278	0	315	1	1	80	1	sub-4	0.233143	FALSE	-13.0534	-34.7322	8.28323	0	0	0	0.32	1.64386	1.68876	0.00128031
222	1	1	23	23	(332.53390807595133, 'Miss', 'Miss')	300	335.034	0	336.034	339.985	left	0.953913	45	315	0	1	20	1	sub-4	0.128	FALSE	-3.06644	7.70305	-2.07596	0	0	2	0.115385	3.11548	1.73456	0.00709739
223	1	1	24	24	(342.986068742739, 'Miss', 'Miss')	408	346.386	1	347.387	351.371	right	0.987004	0	315	1	1	80	0	sub-4	0.267429	FALSE	0.396042	3.93475	-2.27866	0	0	0	0.333333	1.58496	1.7274	0.00666269
224	1	1	25	25	(354.3716758012197, 'Miss', 'Miss')	336	357.172	0	358.172	362.29	right	1.12073	45	315	0	1	20	0	sub-4	0.124	FALSE	4.93216	17.1676	-14.4167	0	0	2	0.142857	2.80735	1.75976	0.00482621
225	1	1	26	26	(365.29058560273006, 'Miss', 'Miss')	384	368.491	0	369.491	372.808	left	0.320118	0	315	1	1	80	1	sub-4	0.264571	FALSE	6.68597	-0.50761	-2.09935	0	0	0	0.344828	1.53605	1.75079	0.00453697
226	1	1	27	27	(375.8093700653717, 'Miss', 'Miss')	300	378.31	0	379.31	383.077	right	0.769942	45	315	0	1	20	0	sub-4	0.239429	FALSE	1.78661	1.47142	0.587151	0	0	2	0.166667	2.58496	1.7741	0.00348614
227	1	1	28	28	(386.0781253987934, 'Miss', 'Miss')	300	388.578	0	389.579	393.246	left	0.671491	0	45	0	1	20	0	sub-4	0.135429	FALSE	1.29776	-5.45658	3.45637	0	0	1	0.0645161	3.9542	1.83319	0.0110498
228	1	1	29	29	(396.24693144479716, 'Miss', 'Miss')	336	399.047	0	400.047	403.398	left	0.354053	45	45	1	1	80	0	sub-4	0.130286	FALSE	-2.25884	-1.56059	-2.05164	0	0	3	0.375	1.41504	1.81942	0.00847163
229	1	1	30	30	(406.39898180894124, 'Miss', 'Miss')	300	408.899	0	409.899	413.05	right	0.153467	45	45	1	1	80	1	sub-4	0.258286	FALSE	-0.00995436	-23.6417	3.46325	0	0	3	0.393939	1.34395	1.80448	0.00411051
230	1	1	31	31	(416.0509087206774, 'Miss', 'Miss')	348	418.951	0	419.951	423.269	right	0.319928	45	45	1	1	80	1	sub-4	0.351429	FALSE	10.036	-2.31241	-2.52341	0	0	3	0.411765	1.28011	1.78866	0.00359005
231	1	1	32	32	(426.2696333713211, 'Miss', 'Miss')	348	429.17	0	430.17	434.038	left	0.871456	0	315	1	1	80	1	sub-4	0.255429	FALSE	-3.91679	-17.101	8.8223	0	0	0	0.314286	1.66985	1.78416	0.000854664
232	1	1	33	33	(437.0385376798931, 'Miss', 'Miss')	372	440.139	0	441.139	444.49	left	0.353966	0	315	1	1	80	1	sub-4	0.129143	FALSE	3.24649	3.53462	-3.56051	0	0	0	0.333333	1.58496	1.77773	0.00450817
233	1	1	34	34	(447.4907072241567, 'Miss', 'Miss')	408	450.891	0	451.891	455.292	left	0.403062	0	315	1	1	80	1	sub-4	0.137143	FALSE	4.2392	17.8083	-6.01037	0	0	0	0.351351	1.50901	1.76974	0.00393154
234	1	1	35	35	(458.29287932069565, 'Miss', 'Miss')	300	460.793	1	461.793	465.294	right	0.504506	0	45	0	1	20	1	sub-4	0.124571	FALSE	7.07673	16.7282	-23.5725	0	0	1	0.0789474	3.66297	1.81319	0.00499891
235	1	1	36	36	(468.2949341790609, 'Miss', 'Miss')	348	471.195	0	472.195	475.879	left	0.68778	0	45	0	1	20	0	sub-4	0	FALSE	4.10671	-23.1479	3.30357	0	0	1	0.102564	3.2854	1.84628	0.0181201
236	1	1	37	37	(478.8803857152525, 'Miss', 'Miss')	360	481.881	0	482.881	485.931	right	0.0545404	0	315	1	1	80	0	sub-4	0	FALSE	14.3724	7.28856	-3.62869	0	0	0	0.35	1.51457	1.8374	0.00352523
237	1	1	38	38	(488.9324310303309, 'Miss', 'Miss')	312	491.533	0	492.533	495.967	left	0.438025	0	315	1	1	80	1	sub-4	0.236571	FALSE	1.91996	-27.7776	2.08538	0	0	0	0.365854	1.45066	1.82749	0.00299927
238	1	1	39	39	(498.9678443933735, 'Miss', 'Miss')	336	501.768	1	502.768	506.836	left	1.07097	45	45	1	1	80	0	sub-4	0.201143	FALSE	-0.804367	-14.9073	10.3216	0	0	3	0.357143	1.48543	1.81884	0.000577969
239	1	1	40	40	(509.83672489921264, 'Miss', 'Miss')	336	512.637	0	513.637	517.755	right	1.12045	45	45	1	1	80	1	sub-4	0.181714	FALSE	6.4288	-15.6063	8.55277	0	0	3	0.372093	1.42626	1.80929	0.00265235
240	1	1	41	41	(520.7555833778133, 'Miss', 'Miss')	408	524.156	0	525.156	528.774	left	0.620801	0	315	1	1	80	1	sub-4	0.198857	FALSE	4.24122	-7.96392	1.86187	0	0	0	0.363636	1.45943	1.80089	0.000494694
241	1	1	42	42	(531.7745298543978, 'Miss', 'Miss')	384	534.975	0	535.975	539.592	left	0.620333	0	315	1	1	80	1	sub-4	0.122286	FALSE	3.42195	4.51858	-7.78892	0	0	0	0.377778	1.40439	1.79172	0.00236205
242	1	1	43	43	(542.5933655289809, 'Miss', 'Miss')	336	545.394	0	546.394	550.028	right	0.63784	45	315	0	1	20	0	sub-4	0.117714	FALSE	-1.10893	2.10093	3.37089	0	0	2	0.130435	2.9386	1.81402	0.00196777
243	1	1	44	44	(553.0288051915486, 'Miss', 'Miss')	300	555.529	0	556.529	560.863	right	1.33771	45	45	1	1	80	1	sub-4	0.129143	FALSE	-1.87225	-10.1204	4.37959	0	0	3	0.361702	1.46713	1.80625	0.00195499
244	1	1	45	45	(563.8643563219284, 'Miss', 'Miss')	324	566.565	1	567.565	570.949	left	0.387556	45	45	1	1	80	0	sub-4	0.122857	FALSE	-6.6064	-8.90752	2.47264	0	0	3	0.375	1.41504	1.79776	0.0021
245	1	1	46	46	(573.9497401673616, 'Miss', 'Miss')	300	576.45	0	577.45	581.017	right	0.570705	45	45	1	1	80	1	sub-4	0.126286	FALSE	0.217298	-7.83773	-2.16374	0	0	3	0.387755	1.36678	1.78869	0.00190755
246	1	1	47	47	(584.0184856800752, 'Miss', 'Miss')	372	587.119	1	588.119	591.653	right	0.537177	45	45	1	1	80	1	sub-4	0.252571	FALSE	-7.34045	-18.2231	1.75085	0	0	3	0.4	1.32193	1.77912	0.00173917
247	1	1	48	48	(594.6539523634619, 'Miss', 'Miss')	408	598.054	1	599.055	602.205	right	0.154034	45	45	1	1	80	1	sub-4	0.128	FALSE	-11.8123	-2.70174	5.0139	0	0	3	0.411765	1.28011	1.76915	0.00159104
248	1	1	49	49	(605.20608784041, 'Miss', 'Miss')	336	608.006	1	609.007	612.357	left	0.354396	0	45	0	1	20	0	sub-4	0.129143	FALSE	3.66767	4.46591	0.415037	0	0	1	0.0961538	3.37851	1.79721	0.00214109
249	1	1	50	50	(615.3581431981329, 'Miss', 'Miss')	324	618.058	1	619.059	622.359	right	0.304804	45	45	1	1	80	1	sub-4	0.12	FALSE	9.58922	5.56412	-3.26116	0	0	3	0.415094	1.26849	1.78708	0.00209303
250	1	1	51	51	(625.3602138695023, 'Miss', 'Miss')	312	627.96	1	628.961	632.311	right	0.35314	45	45	1	1	80	1	sub-4	0.257714	FALSE	-1.50671	-0.930532	1.50205	0	0	3	0.425926	1.23133	1.77665	0.00133785
251	1	1	52	52	(635.312217515926, 'Miss', 'Miss')	408	638.713	0	639.713	643.397	left	0.688141	45	45	1	1	80	0	sub-4	0.179429	FALSE	3.7097	1.86304	8.85329	0	0	3	0.436364	1.1964	1.76599	0.00123536
252	1	1	53	53	(646.3978640791775, 'Miss', 'Miss')	384	649.598	0	650.598	653.949	left	0.353048	0	315	1	1	80	1	sub-4	0.132571	FALSE	-4.18876	-8.83567	1.06178	0	0	0	0.321429	1.63743	1.76327	0.000301102
253	1	1	54	54	(656.9499443493187, 'Miss', 'Miss')	300	659.45	0	660.45	664.151	left	0.703465	0	315	1	1	80	1	sub-4	0.132	FALSE	6.67599	-11.9598	-4.92124	0	0	0	0.333333	1.58496	1.75977	0.00178879
254	1	1	55	55	(667.1520511964063, 'Miss', 'Miss')	372	670.252	0	671.253	674.953	left	0.70365	0	315	1	1	80	1	sub-4	0.102857	FALSE	3.73976	1.72381	-12.6717	0	0	0	0.344828	1.53605	1.75559	0.00163998
255	1	1	56	56	(677.9542427124234, 'Miss', 'Miss')	324	680.654	0	681.655	685.322	left	0.669778	0	315	1	1	80	1	sub-4	0.0194286	FALSE	0.089805	-3.77709	-4.85133	0	0	0	0.355932	1.49033	1.7508	0.00150836
256	1	1	57	57	(688.3230560823467, 'Miss', 'Miss')	300	690.823	1	691.823	695.541	right	0.72142	45	315	0	1	20	0	sub-4	0.134857	FALSE	0.918272	-1.9569	-1.81583	0	0	2	0.116667	3.09954	1.7715	0.00137576
257	1	1	58	58	(698.5417371778713, 'Miss', 'Miss')	336	701.342	1	702.342	706.376	right	1.03802	0	315	1	1	80	0	sub-4	0.118857	FALSE	2.04767	-19.3757	7.97005	0	0	0	0.360656	1.47131	1.76632	0.001342
258	1	1	59	59	(709.3772885856743, 'Miss', 'Miss')	336	712.178	1	713.178	716.645	left	0.469906	45	315	0	1	20	1	sub-4	0.346857	FALSE	-0.23146	-6.91254	5.84482	0	0	2	0.129032	2.9542	1.78399	0.00114508
259	1	1	60	60	(719.6460511320438, 'Miss', 'Miss')	336	722.446	1	723.446	727.147	left	0.704409	0	315	1	1	80	1	sub-4	0.299429	FALSE	-5.40976	-11.2494	7.7682	0	0	0	0.365079	1.45372	1.77852	0.00111722
260	1	1	61	61	(730.1481731263248, 'Miss', 'Miss')	408	733.549	1	734.549	737.883	left	0.336609	45	315	0	1	20	1	sub-4	0.0668571	FALSE	-10.2609	7.15792	-14.1634	0	0	2	0.140625	2.83007	1.79368	0.000968172
261	1	1	62	62	(740.8836845299975, 'Miss', 'Miss')	312	743.484	1	744.484	747.701	left	0.219715	45	45	1	1	80	0	sub-4	0.262286	FALSE	6.83705	4.93577	-7.23916	0	0	3	0.384615	1.37851	1.78713	0.000927133
262	1	1	63	63	(750.7023326678918, 'Miss', 'Miss')	396	754.003	0	755.003	758.537	right	0.538251	45	45	1	1	80	1	sub-4	0.122286	FALSE	6.95913	9.43051	0.0501946	0	0	3	0.393939	1.34395	1.78027	0.00102258
263	1	1	64	64	(761.5379304050239, 'Miss', 'Miss')	372	764.638	0	765.638	770.289	left	1.65405	45	45	1	1	80	0	sub-4	0.250286	FALSE	-3.6094	-7.32243	12.2301	0	0	3	0.402985	1.3112	1.77314	0.000955186
264	1	1	65	65	(773.2902846007964, 'Miss', 'Miss')	408	776.691	1	777.691	781.225	right	0.537829	45	45	1	1	80	1	sub-4	0.133714	FALSE	-3.15366	-2.10135	3.56355	0	0	3	0.411765	1.28011	1.76578	0.000893883
265	1	1	66	66	(784.2259173484745, 'Miss', 'Miss')	312	786.826	1	787.826	791.377	left	0.553827	0	45	0	1	20	0	sub-4	0	FALSE	5.58316	3.88436	-2.75041	0	0	1	0.0869565	3.52356	1.78941	0.00139273
266	1	1	67	67	(794.377861182902, 'Miss', 'Miss')	348	797.278	0	798.278	801.646	left	0.37114	0	315	1	1	80	1	sub-4	0.210286	FALSE	10.634	9.73557	-12.186	0	0	0	0.342857	1.54432	1.78568	0.00144057
267	1	1	68	68	(804.6466498068585, 'Miss', 'Miss')	408	808.047	0	809.047	812.565	left	0.520675	0	315	1	1	80	1	sub-4	0.130857	FALSE	5.76321	-1.95319	-2.69777	0	0	0	0.352113	1.50589	1.78154	0.00105812
268	1	1	69	69	(815.5655071757756, 'Miss', 'Miss')	360	818.566	1	819.566	822.933	right	0.370227	0	315	1	1	80	0	sub-4	0.134857	FALSE	15.4048	-6.62976	3.4899	0	0	0	0.361111	1.46949	1.77703	0.000988936
269	1	1	70	70	(825.9343438490741, 'Miss', 'Miss')	312	828.534	1	829.535	832.835	left	0.303956	0	315	1	1	80	1	sub-4	0.153143	FALSE	-6.74936	-8.48842	-9.62624	0	0	0	0.369863	1.43494	1.77218	0.000926037
270	1	1	71	71	(835.8362618833344, 'Miss', 'Miss')	408	839.237	0	840.237	843.654	left	0.420167	0	315	1	1	80	1	sub-4	0.237143	FALSE	-7.29633	0.754694	2.14061	0	0	0	0.378378	1.4021	1.76704	0.000868686
271	1	1	72	72	(846.6551710745189, 'Miss', 'Miss')	300	849.155	1	850.156	853.773	left	0.619831	0	45	0	1	20	0	sub-4	0.122857	FALSE	-2.74917	15.2133	-13.5914	0	0	1	0.0933333	3.42146	1.78764	0.00112213
272	1	1	73	73	(856.7738740308287, 'Miss', 'Miss')	372	859.874	1	860.874	864.208	right	0.336249	45	45	1	1	80	1	sub-4	0.0937143	FALSE	13.9196	25.9593	-11.8832	0	0	3	0.381579	1.38995	1.78227	0.00110291
273	1	1	74	74	(867.2093250676626, 'Miss', 'Miss')	300	869.71	0	870.71	874.444	left	0.736298	0	45	0	1	20	0	sub-4	0.125143	FALSE	2.11042	-12.5912	4.96778	0	0	1	0.103896	3.26679	1.80032	0.00094341
274	1	1	75	75	(877.4447299416188, 'Miss', 'Miss')	336	880.245	0	881.245	884.646	right	0.40326	45	45	1	1	80	1	sub-4	0.0542857	FALSE	-1.29924	-3.21926	-3.52161	0	0	3	0.384615	1.37851	1.79479	0.000927339
275	1	1	76	76	(887.6467929561659, 'Miss', 'Miss')	360	890.647	0	891.647	894.965	right	0.321553	0	315	1	1	80	0	sub-4	0.117143	FALSE	-1.54795	4.31326	2.74072	0	0	0	0.367089	1.4458	1.79024	0.000146189
276	1	1	77	77	(897.965564269045, 'Miss', 'Miss')	300	900.466	1	901.466	905.784	right	1.32017	0	315	1	1	80	0	sub-4	0.198286	FALSE	1.63315	1.91266	8.73568	0	0	0	0.375	1.41504	1.78542	0.000753891
277	1	1	78	78	(908.7844654150158, 'Miss', 'Miss')	408	912.185	1	913.185	916.769	right	0.587487	45	45	1	1	80	1	sub-4	0.125143	FALSE	-0.369003	-2.87586	0.612886	0	0	3	0.382716	1.38565	1.78037	0.000134569
278	1	1	79	79	(919.7700231480194, 'Miss', 'Miss')	312	922.37	1	923.37	927.071	left	0.703531	0	315	1	1	80	1	sub-4	0.148	FALSE	-7.5163	-15.1752	6.35776	0	0	0	0.378049	1.40336	1.77566	0.000129079
279	1	1	80	80	(930.0720876051564, 'Miss', 'Miss')	336	932.872	0	933.873	937.473	right	0.603788	45	45	1	1	80	1	sub-4	0.201714	FALSE	-3.01416	-8.85646	-5.26366	0	0	3	0.385542	1.37504	1.77073	0.000124153
280	1	1	81	81	(940.4742550410192, 'Miss', 'Miss')	384	943.675	1	944.675	948.325	left	0.653897	0	315	1	1	80	1	sub-4	0.231429	FALSE	0.899453	5.04598	5.72802	0	0	0	0.380952	1.39232	1.76611	0.000119223
281	1	1	82	82	(951.326389574735, 'Miss', 'Miss')	336	954.127	1	955.127	958.744	left	0.620182	0	315	1	1	80	1	sub-4	0	FALSE	-2.91669	-9.58442	4.17131	0	0	0	0.388235	1.365	1.7613	0.000631001
282	1	1	83	83	(961.7452014465853, 'Miss', 'Miss')	408	965.146	0	966.146	969.68	right	0.537541	45	45	1	1	80	1	sub-4	0.136	FALSE	10.5516	4.34681	-10.4173	0	0	3	0.383721	1.38187	1.75678	0.000110349
283	1	1	84	84	(972.6807803745633, 'Miss', 'Miss')	360	975.681	1	976.681	980.215	left	0.536489	0	315	1	1	80	1	sub-4	0	FALSE	-0.724776	7.05781	7.56112	0	0	0	0.390805	1.35548	1.75208	0.000106348
284	1	1	85	85	(983.2162162087188, 'Miss', 'Miss')	396	986.517	1	987.517	990.884	left	0.371359	0	315	1	1	80	1	sub-4	0.269714	FALSE	-13.7553	-34.1215	15.915	0	0	0	0.397727	1.33015	1.7472	0.000565545
285	1	1	86	86	(993.8850258611983, 'Miss', 'Miss')	372	996.985	1	997.986	1001.42	left	0.437834	0	315	1	1	80	1	sub-4	0.104	FALSE	7.50719	13.9875	-1.10638	0	0	0	0.404494	1.30581	1.74216	0.000537443
286	1	1	87	87	(1004.4205338248485, 'Miss', 'Miss')	408	1007.82	1	1008.82	1012.34	right	0.520606	45	45	1	1	80	1	sub-4	0	FALSE	10.2977	2.86195	-0.178161	0	0	3	0.377778	1.40439	1.73831	9.5446e-05
287	1	1	88	88	(1015.3393687226526, 'Miss', 'Miss')	372	1018.44	1	1019.44	1023.42	left	0.988263	0	315	1	1	80	1	sub-4	0.157143	FALSE	6.10088	6.62431	-13.6801	0	0	0	0.406593	1.29834	1.7334	9.24856e-05
288	1	1	89	89	(1026.4250025245328, 'Miss', 'Miss')	300	1028.93	0	1029.93	1033.39	right	0.471221	45	315	0	1	20	0	sub-4	0.126286	FALSE	2.30885	9.41872	-9.11423	0	0	2	0.108696	3.20163	1.74852	0.000620306
289	1	1	90	90	(1036.3937069234325, 'Miss', 'Miss')	324	1039.09	0	1040.09	1043.59	left	0.503813	0	45	0	1	20	0	sub-4	0	FALSE	-6.60447	-0.719174	9.49565	0	0	1	0.0967742	3.36923	1.76502	0.00123448
290	1	1	91	91	(1046.5957310990198, 'Miss', 'Miss')	384	1049.8	0	1050.8	1054.46	left	0.670972	45	45	1	1	80	0	sub-4	0.448571	TRUE	-4.6757	-36.1815	15.0919	0	0	3	0.37234	1.42531	1.76131	0.000704701
291	1	1	92	92	(1057.4645932950643, 'Miss', 'Miss')	324	1060.16	0	1061.17	1064.77	right	0.604532	45	45	1	1	80	1	sub-4	0.106857	FALSE	-2.16781	0.451309	7.95406	0	0	3	0.378947	1.39993	1.75742	0.00052534
292	1	1	93	93	(1067.7666996427924, 'Miss', 'Miss')	372	1070.87	1	1071.87	1075.98	right	1.12075	0	315	1	1	80	0	sub-4	0.457143	TRUE	-0.780231	10.2976	-16.1954	0	0	0	0.395833	1.33703	1.75297	8.77454e-05
293	1	1	94	94	(1078.9856553852442, 'Miss', 'Miss')	312	1081.59	1	1082.59	1086.12	right	0.537232	45	45	1	1	80	1	sub-4	0.128571	FALSE	-4.07433	-1.04682	1.23473	0	0	3	0.381443	1.39046	1.74915	8.46069e-05
294	1	1	95	95	(1089.1210138743863, 'Miss', 'Miss')	348	1092.02	1	1093.02	1096.46	right	0.437233	45	45	1	1	80	1	sub-4	0.205714	FALSE	-2.52839	-10.7731	5.32215	0	0	3	0.387755	1.36678	1.74517	0.000475467
295	1	1	96	96	(1099.4564401652533, 'Miss', 'Miss')	384	1102.66	0	1103.66	1107.11	left	0.453122	0	45	0	1	20	0	sub-4	0.126286	FALSE	5.27197	0.804968	-7.44157	0	0	1	0.10101	3.30743	1.76017	0.000594177
296	1	1	97	97	(1110.1085956720071, 'Miss', 'Miss')	348	1113.01	1	1114.01	1117.51	right	0.503394	45	45	1	1	80	1	sub-4	0.258857	FALSE	-7.08934	-15.1136	13.4275	0	0	3	0.39	1.35845	1.75608	0.000586462
297	1	1	98	98	(1120.5107242689119, 'Miss', 'Miss')	300	1123.01	1	1124.01	1127.66	right	0.653708	45	45	1	1	80	1	sub-4	0.246286	FALSE	-7.504	-2.80766	5.08328	0	0	3	0.39604	1.33628	1.75186	0.000432232
298	1	1	99	99	(1130.6627921105865, 'Miss', 'Miss')	348	1133.56	0	1134.56	1138.66	left	1.10497	0	315	1	1	80	1	sub-4	0.131429	FALSE	-7.77825	0.951866	7.03763	0	0	0	0.382353	1.38702	1.74821	7.6153e-05
299	1	1	100	100	(1141.66501009258, 'Miss', 'Miss')	360	1144.67	0	1145.67	1149.15	left	0.488096	0	315	1	1	80	1	sub-4	0.0977143	FALSE	1.48086	6.77135	-8.89438	0	0	0	0.38835	1.36457	1.74441	0.000429289
300	1	2	101	1	(1370.060050579421, 'Miss', 'Miss')	300	1372.56	1	1373.56	1377.03	right	0.470113	45	45	1	1	80	1	sub-4	0.349714	FALSE	13.1407	3.32805	-9.76594	0	0	3	0.394231	1.34289	1.74049	7.14653e-05
301	1	2	102	2	(1380.0299728571154, 'Miss', 'Miss')	300	1382.53	1	1383.53	1387.11	right	0.587822	45	45	1	1	80	1	sub-4	0.253714	FALSE	-6.73615	-6.62674	8.17301	0	0	3	0.4	1.32193	1.73644	0.000393304
302	1	2	103	3	(1390.1153547606027, 'Miss', 'Miss')	396	1393.42	1	1394.42	1398.03	right	0.620453	45	45	1	1	80	1	sub-4	0.458286	TRUE	-1.12153	5.30485	1.97868	0	0	3	0.40566	1.30166	1.73229	0.000376892
303	1	2	104	4	(1401.0342781557483, 'Miss', 'Miss')	372	1404.13	0	1405.13	1408.75	left	0.619994	0	315	1	1	80	1	sub-4	0.132	FALSE	2.59762	8.10382	-5.46386	0	0	0	0.383178	1.38391	1.72896	6.52633e-05
304	1	2	105	5	(1411.7531054522133, 'Miss', 'Miss')	324	1414.45	0	1415.45	1419.17	right	0.719686	45	45	1	1	80	1	sub-4	0.128571	FALSE	-5.0648	1.01688	2.67526	0	0	3	0.407407	1.29546	1.7249	6.35245e-05
305	1	2	106	6	(1422.171875710892, 'Miss', 'Miss')	384	1425.37	0	1426.37	1429.86	left	0.487182	0	315	1	1	80	1	sub-4	0.133143	FALSE	-4.01118	5.03342	-2.33881	0	0	0	0.385321	1.37587	1.72163	6.14411e-05
306	1	2	107	7	(1432.8573494962584, 'Miss', 'Miss')	336	1435.66	1	1436.66	1440.19	right	0.538195	45	45	1	1	80	1	sub-4	0.190286	FALSE	-6.20097	-6.27511	4.77402	0	0	3	0.409091	1.28951	1.71765	5.98352e-05
307	1	2	108	8	(1443.1928029743976, 'Miss', 'Miss')	360	1446.19	0	1447.19	1450.69	right	0.503067	45	45	1	1	80	1	sub-4	0	FALSE	-0.650972	6.8202	-15.5948	0	0	3	0.414414	1.27085	1.71358	0.000331403
308	1	2	109	9	(1453.6949421687896, 'Miss', 'Miss')	312	1456.3	1	1457.3	1460.4	right	0.103318	45	45	1	1	80	1	sub-4	0.117143	FALSE	-8.32701	-5.09437	17.5094	0	0	3	0.419643	1.25277	1.70943	0.000318551
309	1	2	110	10	(1463.396870079243, 'Miss', 'Miss')	408	1466.8	0	1467.8	1471.8	right	1.00458	45	45	1	1	80	1	sub-4	0.0405714	FALSE	9.3879	11.2471	-13.3097	0	0	3	0.424779	1.23522	1.70519	0.000306387
310	1	2	111	11	(1474.7992439164318, 'Miss', 'Miss')	336	1477.6	1	1478.6	1482.13	left	0.536646	0	315	1	1	80	1	sub-4	0.136	FALSE	6.49339	1.55619	0.945434	0	0	0	0.377193	1.40663	1.70251	5.3797e-05
311	1	2	112	12	(1485.1346274844454, 'Miss', 'Miss')	384	1488.33	0	1489.34	1492.65	left	0.319574	0	315	1	1	80	1	sub-4	0.133143	FALSE	6.20449	15.6086	-15.5462	0	0	0	0.382609	1.38606	1.69969	0.000352772
312	1	2	113	13	(1495.6534396891984, 'Miss', 'Miss')	336	1498.45	0	1499.45	1502.89	left	0.438222	0	315	1	1	80	1	sub-4	0.124571	FALSE	-1.66157	-7.18289	9.00891	0	0	0	0.387931	1.36613	1.69676	0.000338968
313	1	2	114	14	(1505.8888492793158, 'Miss', 'Miss')	360	1508.89	0	1509.89	1513.36	left	0.470135	0	45	0	1	20	0	sub-4	0.261143	FALSE	-2.61142	-28.8428	17.504	0	0	1	0.0940171	3.41093	1.7108	0.000464879
314	1	2	115	15	(1516.3576080527582, 'Miss', 'Miss')	348	1519.26	0	1520.26	1529.88	right	6.62138	0	315	1	1	80	0	sub-4	0.328571	FALSE	-5.24547	-2.39688	8.9366	1	1	0	0.389831	1.35908	1.70776	0.000459853
315	1	2	116	16	(1532.8776092845092, 'Miss', 'Miss')	348	1535.78	1	1536.78	1540.58	right	0.804685	45	45	1	1	80	1	sub-4	0.197143	FALSE	-10.9079	-10.7757	-17.1281	0	0	3	0.411765	1.28011	1.70413	4.89652e-05
316	1	2	117	17	(1543.5798309839465, 'Miss', 'Miss')	384	1546.78	1	1547.78	1551.26	left	0.487899	0	45	0	1	20	0	sub-4	0.117143	FALSE	11.0442	4.0433	-14.1692	0	0	1	0.1	3.32193	1.71706	0.000405114
317	1	2	118	18	(1554.265310040315, 'Miss', 'Miss')	360	1557.27	1	1558.27	1561.88	right	0.61966	0	315	1	1	80	0	sub-4	0.272571	FALSE	1.69215	0.322731	7.39537	0	0	0	0.38843	1.36427	1.71409	0.000408496
318	1	2	119	19	(1564.8841655782508, 'Miss', 'Miss')	360	1567.88	0	1568.88	1572.57	left	0.687305	0	45	0	1	20	0	sub-4	0.258286	FALSE	12.768	1.89768	1.58593	0	0	1	0.106557	3.2303	1.72603	0.000371073
319	1	2	120	20	(1575.5696779251557, 'Miss', 'Miss')	324	1578.27	1	1579.27	1582.84	left	0.570152	0	45	0	1	20	0	sub-4	0.224571	FALSE	3.78762	-3.46251	6.45641	0	0	1	0.113821	3.13516	1.73703	0.00151492
320	1	2	121	21	(1585.8384274327327, 'Miss', 'Miss')	372	1588.94	1	1589.94	1593.46	right	0.519733	45	45	1	1	80	1	sub-4	0.125714	FALSE	-2.1297	-1.72346	4.54546	0	0	3	0.403226	1.31034	1.73355	0.000330716
321	1	2	122	22	(1596.4572446865532, 'Miss', 'Miss')	384	1599.66	0	1600.66	1604.14	left	0.487296	45	45	1	1	80	0	sub-4	0	FALSE	1.25782	3.77837	1.72182	0	0	3	0.408	1.29336	1.72999	0.000268319
322	1	2	123	23	(1607.1427595302484, 'Miss', 'Miss')	312	1609.74	1	1610.74	1614.23	right	0.488276	45	45	1	1	80	1	sub-4	0	FALSE	6.48554	14.8979	-12.3491	0	0	3	0.412698	1.27684	1.72636	0.000258976
323	1	2	124	24	(1617.2281403240504, 'Miss', 'Miss')	384	1620.43	0	1621.43	1624.45	right	0.0201214	45	45	1	1	80	1	sub-4	0.183429	FALSE	2.22388	0.636536	-6.4199	0	0	3	0.417323	1.26076	1.72266	0.000250082
324	1	2	125	25	(1627.4468868909626, 'Miss', 'Miss')	336	1630.25	0	1631.25	1634.85	right	0.603849	45	315	0	1	20	0	sub-4	0.249714	FALSE	-1.36901	-33.0714	32.2708	0	0	2	0.0859375	3.54057	1.7363	0.000423254
325	1	2	126	26	(1637.8489600036391, 'Miss', 'Miss')	300	1640.35	0	1641.35	1644.7	left	0.353247	45	45	1	1	80	0	sub-4	0.122857	FALSE	-1.12621	-17.7299	-6.09861	0	0	3	0.418605	1.25634	1.73255	0.000419435
326	1	2	127	27	(1647.7009885624811, 'Miss', 'Miss')	408	1651.1	1	1652.1	1656.37	left	1.2713	0	315	1	1	80	1	sub-4	0.145143	FALSE	14.9646	16.0647	-17.2376	0	0	0	0.369231	1.43741	1.73023	4.541e-05
327	1	2	128	28	(1659.3700023969177, 'Miss', 'Miss')	312	1661.97	0	1662.97	1666.65	left	0.686804	0	315	1	1	80	1	sub-4	0.120571	FALSE	-9.97926	-8.2041	12.9022	0	0	0	0.374046	1.41871	1.7278	0.000281909
328	1	2	129	29	(1669.6554271342284, 'Miss', 'Miss')	312	1672.26	1	1673.26	1677.02	left	0.769797	0	315	1	1	80	1	sub-4	0	FALSE	-3.69123	3.49638	2.38698	0	0	0	0.378788	1.40054	1.72527	0.000272073
329	1	2	130	30	(1680.0241869618712, 'Miss', 'Miss')	300	1682.52	0	1683.52	1687.08	right	0.55345	45	45	1	1	80	1	sub-4	0.131429	FALSE	-2.48477	12.4217	-2.1257	0	0	3	0.413534	1.27392	1.72185	4.19322e-05
330	1	2	131	31	(1690.076238657637, 'Miss', 'Miss')	324	1692.78	1	1693.78	1697.71	right	0.937685	45	45	1	1	80	1	sub-4	0	FALSE	-1.73178	-2.99009	2.44446	0	0	3	0.41791	1.25873	1.71836	0.000224076
331	1	2	132	32	(1700.7117294766613, 'Miss', 'Miss')	348	1703.61	1	1704.61	1708.28	left	0.670613	0	315	1	1	80	1	sub-4	0	FALSE	1.28511	5.02897	-5.03299	0	0	0	0.377778	1.40439	1.71599	3.99361e-05
332	1	2	133	33	(1711.2805473962908, 'Miss', 'Miss')	408	1714.68	0	1715.68	1719.37	right	0.687042	45	45	1	1	80	1	sub-4	0.124	FALSE	-2.86319	10.8164	-1.75166	0	0	3	0.419118	1.25457	1.71257	3.91671e-05
333	1	2	134	34	(1722.366067455505, 'Miss', 'Miss')	360	1725.37	0	1726.37	1729.88	left	0.519871	0	315	1	1	80	1	sub-4	0.12	FALSE	-1.67785	4.3872	-12.1981	0	0	0	0.379562	1.39759	1.71022	3.80651e-05
334	1	2	135	35	(1732.8848818796287, 'Miss', 'Miss')	300	1735.39	0	1736.39	1740.1	right	0.721559	0	315	1	1	80	0	sub-4	0.174286	FALSE	0.550473	0.440569	-2.30017	0	0	0	0.384058	1.3806	1.70779	0.000243387
335	1	2	136	36	(1743.103668950027, 'Miss', 'Miss')	300	1745.6	0	1746.6	1750.47	right	0.87112	45	45	1	1	80	1	sub-4	0.113714	FALSE	0.673077	20.71	-11.1584	0	0	3	0.417266	1.26096	1.70455	3.63096e-05
336	1	2	137	37	(1753.4724276679863, 'Miss', 'Miss')	348	1756.37	0	1757.37	1761.19	right	0.820603	45	315	0	1	20	0	sub-4	0.149143	FALSE	8.90596	13.3031	-19.0579	0	0	2	0.0857143	3.54432	1.71722	0.000356139
337	1	2	138	38	(1764.1912566289775, 'Miss', 'Miss')	384	1767.39	0	1768.39	1771.99	left	0.604111	0	315	1	1	80	1	sub-4	0	FALSE	-8.52219	7.07231	-5.18555	0	0	0	0.382979	1.38466	1.71482	0.000361077
338	1	2	139	39	(1774.9934733903192, 'Miss', 'Miss')	348	1777.89	0	1778.89	1782.73	right	0.837339	0	315	1	1	80	0	sub-4	0.168	FALSE	-3.44709	3.56684	7.13455	0	0	0	0.387324	1.36839	1.71234	0.000226698
339	1	2	140	40	(1785.729022245845, 'Miss', 'Miss')	360	1788.73	1	1789.73	1793.76	left	1.03715	0	315	1	1	80	1	sub-4	0.270286	FALSE	9.18144	8.6303	-15.6859	0	0	0	0.391608	1.35252	1.70979	0.000219529
340	1	2	141	41	(1796.7645512935032, 'Miss', 'Miss')	408	1800.16	1	1801.17	1804.83	right	0.670774	45	45	1	1	80	1	sub-4	0	FALSE	2.04232	13.6361	-9.77197	0	0	3	0.409722	1.28728	1.70682	3.36469e-05
341	1	2	142	42	(1807.833420258623, 'Miss', 'Miss')	408	1811.23	0	1812.23	1815.68	left	0.45323	0	315	1	1	80	1	sub-4	0.121143	FALSE	5.89058	18.6855	-6.83463	0	0	0	0.393103	1.34702	1.70431	3.28376e-05
342	1	2	143	43	(1818.6856787995875, 'Miss', 'Miss')	360	1821.69	0	1822.69	1826.39	left	0.703483	0	315	1	1	80	1	sub-4	0.210857	FALSE	0.166905	-17.6661	11.4221	0	0	0	0.39726	1.33184	1.70172	0.00020565
343	1	2	144	44	(1829.3878067306796, 'Miss', 'Miss')	324	1832.09	1	1833.09	1836.79	left	0.703777	0	315	1	1	80	1	sub-4	0	FALSE	-2.73744	18.2207	-9.96739	0	0	0	0.401361	1.31703	1.69908	0.00019941
344	1	2	145	45	(1839.7898859466222, 'Miss', 'Miss')	300	1842.29	0	1843.29	1847.11	right	0.820072	45	45	1	1	80	1	sub-4	0.0211429	FALSE	6.25814	13.6729	-5.63214	0	0	3	0.405405	1.30256	1.69637	3.06971e-05
345	1	2	146	46	(1850.108648659445, 'Miss', 'Miss')	396	1853.41	0	1854.41	1858.01	right	0.603512	45	45	1	1	80	1	sub-4	0.138857	FALSE	-6.09815	-2.18287	-2.12789	0	0	3	0.409396	1.28843	1.6936	0.000187704
346	1	2	147	47	(1861.0108624246386, 'Miss', 'Miss')	336	1863.81	1	1864.81	1868.53	right	0.719658	45	315	0	1	20	0	sub-4	0.270857	FALSE	-0.663148	-6.86892	3.32175	0	0	2	0.0866667	3.52838	1.70543	0.00030861
347	1	2	148	48	(1871.5296693583914, 'Miss', 'Miss')	408	1874.93	1	1875.93	1879.35	right	0.421175	45	45	1	1	80	1	sub-4	0	FALSE	-5.0423	-2.08945	11.8787	0	0	3	0.410596	1.28421	1.70261	0.00030618
348	1	2	149	49	(1882.3484811747567, 'Miss', 'Miss')	372	1885.45	1	1886.45	1890.08	left	0.636731	0	315	1	1	80	1	sub-4	0	FALSE	-0.8059	2.17899	0.457675	0	0	0	0.394737	1.34104	1.7002	2.94384e-05
349	1	2	150	50	(1893.08407081119, 'Miss', 'Miss')	408	1896.48	1	1897.48	1901.25	right	0.770551	45	45	1	1	80	1	sub-4	0.117714	FALSE	0.846688	10.2341	-2.76501	0	0	3	0.411765	1.28011	1.69743	2.88699e-05
350	1	2	151	51	(1904.2530069677086, 'Miss', 'Miss')	324	1906.95	1	1907.95	1911.67	right	0.721113	45	45	1	1	80	1	sub-4	0.131429	FALSE	5.0099	-1.31201	0.277532	0	0	3	0.415584	1.26679	1.69461	0.000171262
351	1	2	152	52	(1914.671791929708, 'Miss', 'Miss')	384	1917.87	1	1918.87	1922.37	right	0.503584	45	45	1	1	80	1	sub-4	0.136	FALSE	1.03992	0.0186718	2.63724	0	0	3	0.419355	1.25376	1.69174	0.000166449
352	1	2	153	53	(1925.3739495448626, 'Miss', 'Miss')	372	1928.47	1	1929.47	1933.03	left	0.553723	0	45	0	1	20	0	sub-4	0	FALSE	-0.47885	-10.3028	7.97051	0	0	1	0.0961538	3.37851	1.70221	0.000251979
353	1	2	154	54	(1936.0261153161991, 'Miss', 'Miss')	372	1939.13	1	1940.13	1943.81	left	0.686929	0	315	1	1	80	1	sub-4	0.135429	FALSE	9.26519	16.73	-12.7798	0	0	0	0.388535	1.36388	1.70003	0.000255691
354	1	2	155	55	(1946.8116759898658, 'Miss', 'Miss')	324	1949.51	0	1950.51	1953.88	right	0.37091	45	45	1	1	80	1	sub-4	0.130857	FALSE	-7.71997	-0.112837	-1.8731	0	0	3	0.417722	1.25939	1.69722	2.72658e-05
355	1	2	156	56	(1956.8803013792258, 'Miss', 'Miss')	372	1959.98	0	1960.98	1964.43	left	0.453483	0	315	1	1	80	1	sub-4	0.162857	FALSE	-4.24352	6.22065	-4.2893	0	0	0	0.389937	1.35869	1.69506	2.6637e-05
356	1	2	157	57	(1967.432475140291, 'Miss', 'Miss')	312	1970.03	1	1971.03	1974.82	right	0.786767	0	315	1	1	80	0	sub-4	0.137143	FALSE	-11.9022	-1.57787	-0.492055	0	0	0	0.39375	1.34465	1.69284	0.000173755
357	1	2	158	58	(1977.8179157460909, 'Miss', 'Miss')	384	1981.02	1	1982.02	1985.57	left	0.553567	0	45	0	1	20	0	sub-4	0	FALSE	-5.68295	-3.80754	7.6474	0	0	1	0.0993789	3.33092	1.7027	0.000232124
358	1	2	159	59	(1988.5700468952691, 'Miss', 'Miss')	408	1991.97	1	1992.97	1996.55	right	0.587724	45	45	1	1	80	1	sub-4	0.129143	FALSE	8.17291	4.89276	-4.82472	0	0	3	0.41358	1.27376	1.70003	0.00022723
359	1	2	160	60	(1999.5556207186983, 'Miss', 'Miss')	384	2002.76	0	2003.76	2007.26	left	0.503548	45	45	1	1	80	0	sub-4	0.192571	FALSE	-3.96507	-2.99276	0.0653325	0	0	3	0.417178	1.26127	1.69732	0.00015186
360	1	2	161	61	(2010.2578160631274, 'Miss', 'Miss')	372	2013.36	1	2014.36	2017.94	right	0.587734	45	315	0	1	20	0	sub-4	0	FALSE	5.86768	13.842	-7.44358	0	0	2	0.0853659	3.5502	1.70827	0.000262222
361	1	2	162	62	(2020.9432978937075, 'Miss', 'Miss')	312	2023.54	1	2024.54	2028.24	left	0.70366	0	315	1	1	80	1	sub-4	0	FALSE	-7.80384	6.12922	4.66327	0	0	0	0.387879	1.36632	1.70617	0.000265242
362	1	2	163	63	(2031.2454325383915, 'Miss', 'Miss')	396	2034.55	1	2035.55	2039.31	left	0.770739	0	315	1	1	80	1	sub-4	0.137714	FALSE	-15.5563	-3.85854	-6.18499	0	0	0	0.391566	1.35267	1.70401	0.000162903
363	1	2	164	64	(2042.3143508844732, 'Miss', 'Miss')	324	2045.01	0	2046.01	2049.92	right	0.904445	45	315	0	1	20	0	sub-4	0.130857	FALSE	2.20998	4.48732	-10.3874	0	0	2	0.0898204	3.47681	1.71431	0.000242763
364	1	2	165	65	(2052.9165073344593, 'Miss', 'Miss')	372	2056.02	0	2057.02	2060.67	left	0.654605	45	45	1	1	80	0	sub-4	0.142857	FALSE	1.22902	-3.55156	1.61153	0	0	3	0.410714	1.28379	1.71173	0.000238168
365	1	2	166	66	(2063.6686556837485, 'Miss', 'Miss')	312	2066.27	0	2067.27	2070.99	left	0.719799	0	315	1	1	80	1	sub-4	0.101143	FALSE	-0.393391	-1.12515	3.35653	0	0	0	0.390533	1.35649	1.7096	2.45394e-05
366	1	2	167	67	(2073.9873587510283, 'Miss', 'Miss')	312	2076.59	1	2077.59	2081.79	left	1.2034	0	315	1	1	80	1	sub-4	0.145143	FALSE	-3.50449	6.18331	6.24019	0	0	0	0.394118	1.3433	1.70742	0.000153665
367	1	2	168	68	(2084.789637377282, 'Miss', 'Miss')	348	2087.69	0	2088.69	2092.59	left	0.903537	0	315	1	1	80	1	sub-4	0.143429	FALSE	-6.93007	-13.9185	-2.25496	0	0	0	0.397661	1.33039	1.70519	0.000149631
368	1	2	169	69	(2095.591805312504, 'Miss', 'Miss')	396	2098.89	1	2099.89	2103.59	right	0.704629	45	45	1	1	80	1	sub-4	0.130857	FALSE	-0.416866	0.301653	7.98328	0	0	3	0.406977	1.29698	1.7028	2.31471e-05
369	1	2	170	70	(2106.5940360558707, 'Miss', 'Miss')	360	2109.59	1	2110.59	2114.3	right	0.704688	45	45	1	1	80	1	sub-4	0.121714	FALSE	2.027	12.2632	-2.02848	0	0	3	0.410405	1.28488	1.70036	0.000138632
370	1	2	171	71	(2117.296215864715, 'Miss', 'Miss')	408	2120.7	0	2121.7	2125.2	right	0.503864	45	45	1	1	80	1	sub-4	0.258857	FALSE	-0.82763	9.69996	-17.4833	0	0	3	0.413793	1.27302	1.69788	0.000135133
371	1	2	172	72	(2128.198407436217, 'Miss', 'Miss')	324	2130.9	0	2131.9	2135.53	left	0.637123	0	315	1	1	80	1	sub-4	0	FALSE	-1.29875	13.6498	-15.7639	0	0	0	0.394286	1.34269	1.69583	2.19164e-05
372	1	2	173	73	(2138.5338453787735, 'Miss', 'Miss')	300	2141.03	1	2142.03	2145.77	left	0.7371	0	45	0	1	20	0	sub-4	0.398286	FALSE	4.12007	11.4623	-6.86405	0	0	1	0.0965909	3.37197	1.70509	0.000201144
373	1	2	174	74	(2148.769251084994, 'Miss', 'Miss')	312	2151.37	1	2152.37	2155.9	left	0.538052	0	315	1	1	80	1	sub-4	0.273143	FALSE	1.9521	7.35427	10.1229	0	0	0	0.39548	1.33832	1.70299	0.000199705
374	1	2	175	75	(2158.9046165096643, 'Miss', 'Miss')	348	2161.8	0	2162.81	2166.42	right	0.621071	45	315	0	1	20	0	sub-4	0.138857	FALSE	2.82811	-8.77184	0.938212	0	0	2	0.0898876	3.47573	1.71267	0.000213346
375	1	2	176	76	(2169.423470327589, 'Miss', 'Miss')	312	2172.02	0	2173.02	2176.44	right	0.420737	45	45	1	1	80	1	sub-4	0.207429	FALSE	9.61648	1.10828	0.974892	0	0	3	0.407821	1.29399	1.71031	0.000210335
376	1	2	177	77	(2179.4420819568622, 'Miss', 'Miss')	408	2182.84	1	2183.84	2187.38	left	0.537106	0	315	1	1	80	1	sub-4	0.261714	FALSE	-2.73608	-1.5513	5.70196	0	0	0	0.394444	1.34211	1.70825	2.1488e-05
377	1	2	178	78	(2190.37767780753, 'Miss', 'Miss')	372	2193.48	0	2194.48	2198.03	right	0.554048	45	45	1	1	80	1	sub-4	0.642857	TRUE	-4.22476	-10.5815	-3.65875	0	0	3	0.40884	1.29039	1.70592	2.11312e-05
378	1	2	179	79	(2201.029882972667, 'Miss', 'Miss')	336	2203.83	0	2204.83	2208.06	right	0.236362	45	45	1	1	80	1	sub-4	0.201143	FALSE	-6.43137	-4.60544	-0.0349722	0	0	3	0.412088	1.27898	1.70355	0.000124383
379	1	2	180	80	(2211.0651886963096, 'Miss', 'Miss')	324	2213.77	1	2214.77	2218.47	left	0.703269	0	315	1	1	80	1	sub-4	0.137143	FALSE	-0.722463	-8.60284	12.4362	0	0	0	0.393443	1.34577	1.70158	2.0392e-05
380	1	2	181	81	(2221.4673253384262, 'Miss', 'Miss')	348	2224.37	0	2225.37	2229.05	left	0.68654	0	315	1	1	80	1	sub-4	0.126286	FALSE	-2.23627	-2.52152	7.57656	0	0	0	0.396739	1.33374	1.69956	0.000129723
381	1	2	182	82	(2232.0528101651544, 'Miss', 'Miss')	360	2235.05	0	2236.05	2239.54	right	0.486418	45	45	1	1	80	1	sub-4	0.192	FALSE	12.6837	20.6421	-16.4177	0	0	3	0.410811	1.28345	1.69729	1.96869e-05
382	1	2	183	83	(2242.5382705233387, 'Miss', 'Miss')	384	2245.74	0	2246.74	2250.34	left	0.60328	0	315	1	1	80	1	sub-4	0.386857	FALSE	-5.13657	-10.5647	6.64395	0	0	0	0.397849	1.32971	1.69529	1.9324e-05
383	1	2	184	84	(2253.3404709168317, 'Miss', 'Miss')	336	2256.14	0	2257.14	2260.66	right	0.520614	45	45	1	1	80	1	sub-4	0.553143	TRUE	-10.3014	0.0337136	-6.24784	0	0	3	0.411765	1.28011	1.69306	1.9014e-05
384	1	2	185	85	(2263.65922752639, 'Miss', 'Miss')	408	2267.06	0	2268.06	2271.54	left	0.48805	0	45	0	1	20	0	sub-4	0.328	FALSE	1.48281	-8.35711	10.8162	0	0	1	0.0957447	3.38466	1.70182	0.000176219
385	1	2	186	86	(2274.544765229588, 'Miss', 'Miss')	372	2277.65	1	2278.65	2282.31	right	0.669884	45	315	0	1	20	0	sub-4	0.213714	FALSE	-0.751876	-5.52414	9.95753	0	0	2	0.0899471	3.47478	1.71095	0.000345699
386	1	2	187	87	(2285.313595466716, 'Miss', 'Miss')	336	2288.11	1	2289.11	2292.56	left	0.454436	0	315	1	1	80	1	sub-4	0.381714	FALSE	-0.240072	-22.526	3.00221	0	0	0	0.394737	1.34104	1.70898	0.00018841
387	1	2	188	88	(2295.5656788994584, 'Miss', 'Miss')	300	2298.07	1	2299.07	2302.78	right	0.719827	45	45	1	1	80	1	sub-4	0.298286	FALSE	1.38441	4.91687	-12.5781	0	0	3	0.408377	1.29203	1.70678	1.90157e-05
388	1	2	189	89	(2305.7844884409715, 'Miss', 'Miss')	372	2308.88	1	2309.88	2313.19	right	0.303299	45	45	1	1	80	1	sub-4	0.0428571	FALSE	16.0122	20.1116	5.3368	0	0	3	0.411458	1.28118	1.70455	0.00011205
389	1	2	190	90	(2316.1865657149647, 'Miss', 'Miss')	408	2319.59	1	2320.59	2324.25	right	0.671507	45	45	1	1	80	1	sub-4	0.134857	FALSE	-7.87033	2.56029	17.4287	0	0	3	0.414508	1.27053	1.70229	0.000109502
390	1	2	191	91	(2327.255434957504, 'Miss', 'Miss')	312	2329.86	0	2330.86	2334.44	right	0.587154	45	315	0	1	20	0	sub-4	0.142286	FALSE	-1.97156	7.23618	-16.5732	0	0	2	0.0927835	3.42999	1.71096	0.000171453
391	1	2	192	92	(2337.4408396650088, 'Miss', 'Miss')	372	2340.54	0	2341.54	2345.23	left	0.687018	0	315	1	1	80	1	sub-4	0.164571	FALSE	1.71194	9.92551	-14.6256	0	0	0	0.389744	1.3594	1.70914	0.00017337
392	1	2	193	93	(2348.2263997838327, 'Miss', 'Miss')	324	2350.93	1	2351.93	2355.33	right	0.402998	45	315	0	1	20	0	sub-4	0	FALSE	-3.97112	7.19608	-4.46145	0	0	2	0.0969388	3.36678	1.71738	0.000162539
393	1	2	194	94	(2358.3284347233603, 'Miss', 'Miss')	384	2361.53	1	2362.53	2365.83	right	0.303264	45	315	0	1	20	0	sub-4	0.138286	FALSE	8.02447	-1.48645	-2.25658	0	0	2	0.101523	3.30012	1.72522	0.000667305
394	1	2	195	95	(2368.8305403497943, 'Miss', 'Miss')	300	2371.33	0	2372.33	2375.68	left	0.353633	0	45	0	1	20	0	sub-4	0.176	FALSE	-7.14256	8.13805	-4.13731	0	0	1	0.0959596	3.38143	1.73337	0.000292463
395	1	2	196	96	(2378.682597205592, 'Miss', 'Miss')	324	2381.38	0	2382.38	2385.98	left	0.603829	0	315	1	1	80	1	sub-4	0.132	FALSE	-1.46367	-4.28875	17.1225	0	0	0	0.386935	1.36984	1.73152	0.000160603
396	1	2	197	97	(2388.9846830241568, 'Miss', 'Miss')	408	2392.38	0	2393.39	2396.75	left	0.370061	0	45	0	1	20	0	sub-4	0.129143	FALSE	-7.98382	-12.1288	7.7066	0	0	1	0.1	3.32193	1.73928	0.000151033
397	1	2	198	98	(2399.753486628855, 'Miss', 'Miss')	300	2402.25	1	2403.25	2406.62	left	0.369833	0	315	1	1	80	1	sub-4	0.127429	FALSE	-5.95519	-1.99079	3.24262	0	0	0	0.38806	1.36565	1.7374	0.000150052
398	1	2	199	99	(2409.6221046942974, 'Miss', 'Miss')	372	2412.72	1	2413.72	2417.37	left	0.654307	0	315	1	1	80	1	sub-4	0.149143	FALSE	-6.56988	-2.61006	-2.47196	0	0	0	0.391089	1.35443	1.73549	0.000110208
399	1	2	200	100	(2420.37435125067, 'Miss', 'Miss')	408	2423.77	1	2424.77	2428.31	left	0.536461	0	315	1	1	80	1	sub-4	0.166286	FALSE	1.18335	8.41698	-4.70272	0	0	0	0.394089	1.34341	1.73354	0.000107757
400	1	1	1	1	(93.44925732205388, 'Miss', 'Miss')	384	96.6501	1	97.6503	101.134	right	0.487242	45	315	1	1	80	0	sub-5	0.297714	FALSE	-0.844942	-2.13465	3.18731	0	0	2	0.25	2	1.92193	0.0780719
401	1	1	2	2	(104.13525055636347, 'Miss', 'Miss')	360	107.135	0	108.136	111.97	left	0.837165	0	45	1	1	80	0	sub-5	0.373143	FALSE	-1.93842	-5.32024	3.16135	0	0	1	0.2	2.32193	1.9183	0.0817042
402	1	1	3	3	(114.97071039749125, 'Miss', 'Miss')	384	118.171	0	119.171	122.472	left	0.302971	0	45	1	1	80	0	sub-5	0.534286	TRUE	0.722855	1.8271	-2.00695	0	0	1	0.333333	1.58496	1.84237	0.193843
403	1	1	4	4	(125.47282571605962, 'Miss', 'Miss')	408	128.873	1	129.873	145.86	left	12.9904	45	45	0	1	20	0	sub-5	0.240571	FALSE	-0.990438	-7.15657	4.41192	1	1	3	0.142857	2.80735	1.90564	0.0543234
404	1	1	5	5	(148.86076515441965, 'Miss', 'Miss')	360	151.861	0	152.861	156.179	right	0.319725	0	315	0	1	20	0	sub-5	0.157143	FALSE	-4.25477	-0.939159	0.00776435	0	0	0	0.125	3	1.97494	0.0818744
405	1	1	6	6	(159.17946362734, 'Miss', 'Miss')	312	161.78	0	162.78	166.947	left	1.17032	0	45	1	1	80	0	sub-5	0.475429	TRUE	-2.69085	-3.08329	0.708927	0	0	1	0.333333	1.58496	1.92193	0.0440869
406	1	1	7	7	(169.94825611750133, 'Miss', 'Miss')	384	173.149	1	174.149	177.816	left	0.670698	45	315	1	1	80	1	sub-5	0.366286	FALSE	-2.25904	0.0518564	1.31476	0	0	2	0.2	2.32193	1.93626	0.0209513
407	1	1	8	8	(180.81706863730204, 'Miss', 'Miss')	312	183.417	1	184.417	212.015	left	24.6008	0	45	1	1	80	0	sub-5	0.324571	FALSE	1.68235	-6.29734	1.62153	1	1	1	0.363636	1.45943	1.88792	0.0173429
408	1	1	9	9	(215.01555958984187, 'Miss', 'Miss')	336	217.816	1	218.816	222.717	left	0.903603	45	315	1	1	80	1	sub-5	0.145143	FALSE	0.780192	4.88002	-0.426373	0	0	2	0.25	2	1.88431	0.0105142
409	1	1	10	10	(225.71768694838732, 'Miss', 'Miss')	324	228.418	0	229.418	233.619	right	1.20367	0	45	1	1	80	1	sub-5	0.445143	TRUE	-1.82125	-2.71083	1.96144	0	0	1	0.384615	1.37851	1.84237	0.00891875
410	1	1	11	11	(236.61981968885817, 'Miss', 'Miss')	348	239.52	0	240.52	244.271	left	0.754855	45	315	1	1	80	1	sub-5	0.372571	FALSE	1.74065	1.08064	-3.12989	0	0	2	0.285714	1.80735	1.83226	0.00607225
411	1	1	12	12	(247.27192038745426, 'Miss', 'Miss')	384	250.472	0	251.472	255.14	left	0.669956	45	45	0	1	20	0	sub-5	0.142286	FALSE	2.83897	5.10081	-3.97254	0	0	3	0.133333	2.90689	1.88286	0.0176379
412	1	1	13	13	(258.1407395653069, 'Miss', 'Miss')	324	260.841	1	261.841	265.192	left	0.353571	45	315	1	1	80	1	sub-5	0.188	FALSE	-2.83901	-1.23558	1.68131	0	0	2	0.3125	1.67807	1.86544	0.0154921
413	1	1	14	14	(268.19272175057944, 'Miss', 'Miss')	396	271.493	1	272.493	275.711	left	0.219785	0	315	0	1	20	1	sub-5	0.703429	TRUE	0.870877	0.944029	-3.09216	0	0	0	0.117647	3.08746	1.9183	0.0152469
414	1	1	15	15	(278.71145667633385, 'Miss', 'Miss')	384	281.912	0	282.912	286.413	right	0.503426	45	315	1	1	80	0	sub-5	0.662857	TRUE	-0.200342	-1.34385	-0.598307	0	0	2	0.333333	1.58496	1.89682	0.0138319
415	1	1	16	16	(289.41357709940866, 'Miss', 'Miss')	408	292.814	1	293.814	297.315	left	0.504403	0	45	1	1	80	0	sub-5	0.314857	FALSE	3.50301	1.26972	-0.670133	0	0	1	0.315789	1.66297	1.88129	0.0036716
416	1	1	17	17	(300.3158163687096, 'Miss', 'Miss')	300	302.816	0	303.816	307.634	right	0.820695	45	315	1	1	80	0	sub-5	0.950857	TRUE	-3.2811	-6.04633	-2.12618	0	0	2	0.35	1.51457	1.86083	0.0031295
417	1	1	18	18	(310.6345020803638, 'Miss', 'Miss')	372	313.735	0	314.735	318.636	left	0.903141	45	315	1	1	80	1	sub-5	0.141143	FALSE	1.13456	1.31656	-0.896723	0	0	2	0.380952	1.39232	1.83713	0.0108206
418	1	1	19	19	(321.6366823149381, 'Miss', 'Miss')	384	324.837	1	325.837	330.338	right	1.50327	0	315	0	1	20	0	sub-5	0.182857	FALSE	-0.426891	-6.86022	2.65536	0	0	0	0.136364	2.87447	1.87418	0.00742829
419	1	1	20	20	(333.3390202343746, 'Miss', 'Miss')	372	336.439	0	337.439	341.34	right	0.903163	45	315	1	1	80	0	sub-5	0.502286	TRUE	6.77336	16.8159	-5.88678	0	0	2	0.391304	1.35364	1.85056	0.00697666
420	1	1	21	21	(344.3412459656367, 'Miss', 'Miss')	336	347.141	1	348.142	351.926	left	0.786452	0	45	1	1	80	0	sub-5	0.226857	FALSE	-3.7192	-5.13008	4.098	0	0	1	0.291667	1.77761	1.84489	0.00215343
421	1	1	22	22	(354.92660468760147, 'Miss', 'Miss')	312	357.527	1	358.527	361.794	left	0.271334	45	315	1	1	80	1	sub-5	0.518286	TRUE	1.2029	-1.95606	-2.07963	0	0	2	0.4	1.32193	1.82318	0.00197276
422	1	1	23	23	(364.79522856259877, 'Miss', 'Miss')	348	367.695	1	368.696	372.046	left	0.353994	0	45	1	1	80	0	sub-5	0.268	FALSE	-2.84868	7.24938	-6.45495	0	0	1	0.307692	1.70044	1.81644	0.00163031
423	1	1	24	24	(375.0472042007869, 'Miss', 'Miss')	348	377.948	1	378.948	382.815	left	0.871201	0	315	0	1	20	1	sub-5	0.377143	FALSE	-0.78154	1.87576	-0.398065	0	0	0	0.148148	2.75489	1.84494	0.00519071
424	1	1	25	25	(385.81606687791185, 'Miss', 'Miss')	396	389.116	1	390.117	393.451	right	0.33764	45	315	1	1	80	0	sub-5	0.132	FALSE	4.57145	3.58604	-2.52745	0	0	2	0.392857	1.34792	1.82648	0.00435516
425	1	1	26	26	(396.4514916532997, 'Miss', 'Miss')	312	399.052	1	400.052	403.769	left	0.720555	0	45	1	1	80	0	sub-5	0.344	FALSE	3.22213	4.49241	-6.31401	0	0	1	0.310345	1.68806	1.82011	0.00134438
426	1	1	27	27	(406.7702073261874, 'Miss', 'Miss')	336	409.57	0	410.571	414.605	right	1.03717	45	315	1	1	80	0	sub-5	0.652571	TRUE	2.91958	-0.249428	-0.391286	0	0	2	0.4	1.32193	1.80292	0.00124387
427	1	1	28	28	(417.6056738253671, 'Miss', 'Miss')	384	420.806	0	421.806	425.674	left	0.86985	45	45	0	1	20	0	sub-5	0.236	FALSE	8.67256	2.05582	-0.718528	0	0	3	0.0967742	3.36923	1.84579	0.0056829
428	1	1	29	29	(428.674584107563, 'Miss', 'Miss')	312	431.275	1	432.275	436.242	left	0.971516	45	315	1	1	80	1	sub-5	0.704	TRUE	2.32861	-2.06481	-1.80904	0	0	2	0.40625	1.29956	1.82828	0.00546773
429	1	1	30	30	(439.24331406752043, 'Miss', 'Miss')	384	442.444	0	443.444	447.661	left	1.21981	45	315	1	1	80	1	sub-5	0.498857	TRUE	3.22484	14.0044	-5.09846	0	0	2	0.424242	1.23704	1.81004	0.00361843
430	1	1	31	31	(450.66227059543513, 'Miss', 'Miss')	300	453.162	0	454.163	458.297	right	1.13733	45	315	1	1	80	0	sub-5	0.434857	TRUE	-0.992678	-2.30634	0.847853	0	0	2	0.441176	1.18057	1.79131	0.00317742
431	1	1	32	32	(461.29763489351836, 'Miss', 'Miss')	372	464.398	0	465.398	469.149	right	0.753951	0	45	1	1	80	1	sub-5	0.739429	TRUE	1.50804	-3.08263	1.35269	0	0	1	0.285714	1.80735	1.79039	0.000934763
432	1	1	33	33	(472.14983862546745, 'Miss', 'Miss')	372	475.25	0	476.25	481.401	right	2.1551	0	45	1	1	80	1	sub-5	0.113714	FALSE	6.30239	2.63779	-0.142822	0	0	1	0.305556	1.71049	1.78704	0.00513811
433	1	1	34	34	(484.4022248435219, 'Miss', 'Miss')	312	487.002	1	488.003	492.053	left	1.05406	0	45	1	1	80	0	sub-5	0.245714	FALSE	0.993385	6.39923	-2.70043	0	0	1	0.324324	1.62449	1.78173	0.00444763
434	1	1	35	35	(495.05435661302687, 'Miss', 'Miss')	348	497.955	1	498.955	502.555	left	0.603159	45	315	1	1	80	1	sub-5	0.133143	FALSE	1.17232	-0.191373	-1.66182	0	0	2	0.421053	1.24793	1.7674	0.000668381
435	1	1	36	36	(505.5564136736412, 'Miss', 'Miss')	348	508.457	0	509.457	513.891	left	1.4373	45	45	0	1	20	0	sub-5	0.739429	TRUE	-2.31013	-3.23214	-0.0863422	0	0	3	0.102564	3.2854	1.80163	0.00341214
436	1	1	37	37	(516.8920019596867, 'Miss', 'Miss')	324	519.592	0	520.592	524.993	left	1.40402	45	315	1	1	80	1	sub-5	0.115429	FALSE	5.23615	9.32905	-0.482181	0	0	2	0.425	1.23447	1.78722	0.00331264
437	1	1	38	38	(527.9942332948092, 'Miss', 'Miss')	384	531.195	1	532.195	535.945	right	0.754057	45	315	1	1	80	0	sub-5	0.406857	TRUE	4.05436	4.99317	-5.063	0	0	2	0.439024	1.18763	1.77242	0.00220183
438	1	1	39	39	(538.9463483082168, 'Miss', 'Miss')	336	541.747	1	542.747	547.348	right	1.60324	45	315	1	1	80	0	sub-5	0.198857	FALSE	3.82222	8.77935	-6.12507	0	0	2	0.452381	1.14439	1.75734	0.00198636
439	1	1	40	40	(550.3486081065112, 'Miss', 'Miss')	336	553.149	1	554.149	558.1	left	0.95428	45	315	1	1	80	1	sub-5	0	FALSE	3.76832	6.30355	-3.55186	0	0	2	0.465116	1.10434	1.74208	0.00179917
440	1	1	41	41	(561.1007521379281, 'Miss', 'Miss')	300	563.601	1	564.601	568.319	right	0.720503	0	45	1	1	80	1	sub-5	0	FALSE	3.71332	9.737	-1.30223	0	0	1	0.295455	1.75899	1.74161	0.000522519
441	1	1	42	42	(571.3194497231084, 'Miss', 'Miss')	360	574.32	0	575.32	579.988	left	1.6699	45	315	1	1	80	1	sub-5	0.135429	FALSE	1.16075	-4.96244	5.29151	0	0	2	0.466667	1.09954	1.72726	0.000507166
442	1	1	43	43	(582.9884155445538, 'Miss', 'Miss')	300	585.489	0	586.489	590.156	right	0.670275	0	45	1	1	80	1	sub-5	0.402857	TRUE	2.4735	4.70185	-6.83793	0	0	1	0.304348	1.71621	1.72629	0.000446104
443	1	1	44	44	(593.1571039471705, 'Miss', 'Miss')	348	596.057	1	597.058	600.958	left	0.903824	45	45	0	1	20	0	sub-5	0.642286	TRUE	1.23082	-5.61253	0.71449	0	0	3	0.106383	3.23266	1.75517	0.00258365
444	1	1	45	45	(603.9592901739916, 'Miss', 'Miss')	336	606.759	0	607.76	611.56	left	0.804088	45	315	1	1	80	1	sub-5	0.350286	FALSE	1.81526	4.97683	-4.81975	0	0	2	0.458333	1.12553	1.74196	0.0021893
445	1	1	46	46	(614.5613373030119, 'Miss', 'Miss')	360	617.562	1	618.562	623.079	right	1.52021	0	45	1	1	80	1	sub-5	0.679429	TRUE	5.71084	1.73841	5.54072	0	0	1	0.306122	1.70782	1.74063	0.000401276
446	1	1	47	47	(626.0802777961183, 'Miss', 'Miss')	360	629.081	1	630.081	633.781	right	0.703446	0	45	1	1	80	1	sub-5	0.261143	FALSE	3.20545	2.53144	-3.70217	0	0	1	0.32	1.64386	1.73815	0.00247525
447	1	1	48	48	(636.7823965546802, 'Miss', 'Miss')	324	639.483	1	640.483	644.25	left	0.769716	45	315	1	1	80	1	sub-5	0.164	FALSE	2.42754	2.78755	-0.0709559	0	0	2	0.45098	1.14886	1.72649	0.000348806
448	1	1	49	49	(647.2510956656638, 'Miss', 'Miss')	408	650.651	1	651.652	655.269	left	0.620148	45	315	1	1	80	1	sub-5	0.708571	TRUE	5.84619	4.32325	-4.5341	0	0	2	0.461538	1.11548	1.71466	0.00124745
449	1	1	50	50	(658.2699967652966, 'Miss', 'Miss')	312	660.87	1	661.87	665.121	right	0.253724	0	45	1	1	80	1	sub-5	0.76	TRUE	-1.20378	-1.68949	-2.56993	0	0	1	0.320755	1.64046	1.71277	0.000305199
450	1	1	51	51	(668.1218703688396, 'Miss', 'Miss')	324	670.822	0	671.822	675.39	left	0.570051	45	315	1	1	80	1	sub-5	0.466286	TRUE	-0.55796	-1.37385	0.839656	0	0	2	0.462963	1.11103	1.70155	0.000296934
451	1	1	52	52	(678.3906159752189, 'Miss', 'Miss')	360	681.391	0	682.391	686.108	left	0.720652	45	315	1	1	80	1	sub-5	0.16	FALSE	4.33941	11.7527	-6.23022	0	0	2	0.472727	1.08092	1.69021	0.00106553
452	1	1	53	53	(689.1093324248793, 'Miss', 'Miss')	396	692.41	0	693.41	696.977	left	0.570108	45	315	1	1	80	1	sub-5	0.606286	TRUE	-4.54705	-8.35492	4.30731	0	0	2	0.482143	1.05247	1.67878	0.000989449
453	1	1	54	54	(699.9781285769691, 'Miss', 'Miss')	384	703.178	1	704.179	707.846	left	0.671639	45	45	0	1	20	0	sub-5	0.474857	TRUE	-0.549855	0.356368	5.17109	0	0	3	0.105263	3.24793	1.70409	0.00154349
454	1	1	55	55	(710.8469577418996, 'Miss', 'Miss')	348	713.747	0	714.747	718.265	right	0.521174	0	45	1	1	80	1	sub-5	0.168	FALSE	-1.09512	-4.30993	2.12184	0	0	1	0.310345	1.68806	1.70336	0.00175196
455	1	1	56	56	(721.2656504445083, 'Miss', 'Miss')	396	724.566	0	725.566	729.384	right	0.82161	0	45	1	1	80	1	sub-5	0.287429	FALSE	0.946856	8.07767	-5.20133	0	0	1	0.322034	1.63472	1.7018	0.0017581
456	1	1	57	57	(732.3845815608584, 'Miss', 'Miss')	348	735.285	0	736.285	739.902	left	0.620064	45	315	1	1	80	1	sub-5	0.154857	FALSE	-3.22523	3.35239	9.95273	0	0	2	0.466667	1.09954	1.6917	0.000236331
457	1	1	58	58	(742.903264054454, 'Miss', 'Miss')	324	745.603	0	746.604	750.154	left	0.55465	45	45	0	1	20	0	sub-5	0.407429	TRUE	-1.97606	1.42073	-3.23891	0	0	3	0.114754	3.12338	1.7134	0.00123165
458	1	1	59	59	(753.1552682667816, 'Miss', 'Miss')	336	755.955	0	756.956	760.523	right	0.569929	0	45	1	1	80	1	sub-5	0.616571	TRUE	-0.0679919	0.951919	-3.7577	0	0	1	0.322581	1.63227	1.71173	0.00138339
459	1	1	60	60	(763.5240208641153, 'Miss', 'Miss')	384	766.724	0	767.724	771.409	right	0.687497	0	45	1	1	80	1	sub-5	0.594857	TRUE	3.51593	-2.67449	-0.340289	0	0	1	0.333333	1.58496	1.7094	0.00146315
460	1	1	61	61	(774.4094676943, 'Miss', 'Miss')	348	777.31	1	778.31	782.127	right	0.821348	0	45	1	1	80	1	sub-5	0.170286	FALSE	3.14861	-2.58276	-4.18161	0	0	1	0.34375	1.54057	1.70648	0.00135248
461	1	1	62	62	(785.1282842921576, 'Miss', 'Miss')	336	787.929	0	788.929	792.696	right	0.770882	0	45	1	1	80	1	sub-5	0.160571	FALSE	1.97369	0.36032	-3.8884	0	0	1	0.353846	1.49881	1.70303	0.00125347
462	1	1	63	63	(795.6970056521313, 'Miss', 'Miss')	300	798.197	1	799.197	803.065	right	0.871434	0	315	0	1	20	0	sub-5	0.232	FALSE	0.022465	-3.26612	2.77676	0	0	0	0.0757576	3.72247	1.73131	0.00182817
463	1	1	64	64	(806.065701656024, 'Miss', 'Miss')	312	808.666	0	809.666	813.984	left	1.31998	45	315	1	1	80	1	sub-5	0.193143	FALSE	0.415533	-2.35273	1.50427	0	0	2	0.432836	1.20811	1.72341	0.00171796
464	1	1	65	65	(816.9845189196867, 'Miss', 'Miss')	312	819.585	0	820.585	824.636	right	1.05442	0	315	0	1	20	0	sub-5	0.383429	FALSE	1.09336	5.48215	-3.94339	0	0	0	0.0882353	3.5025	1.74769	0.00139133
465	1	1	66	66	(827.6365996441273, 'Miss', 'Miss')	360	830.637	1	831.637	835.621	left	0.987509	45	315	1	1	80	1	sub-5	0.141143	FALSE	-2.51504	-6.33298	2.52511	0	0	2	0.434783	1.20163	1.7397	0.00136874
466	1	1	67	67	(838.6221483425059, 'Miss', 'Miss')	372	841.722	1	842.723	847.324	right	1.60427	0	45	1	1	80	1	sub-5	1	TRUE	-0.035194	-0.0999094	0.0662384	0	0	1	0.342857	1.54432	1.73668	0.00016916
467	1	1	68	68	(850.3244443716992, 'Miss', 'Miss')	360	853.325	0	854.325	858.126	right	0.803277	0	315	0	1	20	0	sub-5	0.614857	TRUE	8.1193	7.68445	-4.27926	0	0	0	0.0985915	3.34239	1.75775	0.00121222
468	1	1	69	69	(861.126551534154, 'Miss', 'Miss')	372	864.227	1	865.227	869.661	right	1.4383	0	45	1	1	80	1	sub-5	0.441143	TRUE	5.17921	0.718885	0.923247	0	0	1	0.347222	1.52607	1.75432	0.00118739
469	1	1	70	70	(872.6621621246732, 'Miss', 'Miss')	384	875.862	1	876.863	881.497	left	1.63791	0	45	1	1	80	0	sub-5	0.477714	TRUE	-3.51227	-11.1636	3.92724	0	0	1	0.356164	1.48938	1.75051	0.000983061
470	1	1	71	71	(884.49786137825, 'Miss', 'Miss')	408	887.898	1	888.898	892.449	left	0.55349	45	315	1	1	80	1	sub-5	0.501143	TRUE	5.6054	4.62486	-4.58023	0	0	2	0.418919	1.25526	1.74373	0.000149978
471	1	1	72	72	(895.4499799981024, 'Miss', 'Miss')	348	898.35	1	899.35	902.968	right	0.620781	0	45	1	1	80	1	sub-5	0.274286	FALSE	0.594303	-0.892617	0.833406	0	0	1	0.36	1.47393	1.73995	0.000141718
472	1	1	73	73	(905.9687041045227, 'Miss', 'Miss')	324	908.669	1	909.669	913.253	left	0.586401	45	315	1	1	80	1	sub-5	0.413714	TRUE	1.59744	4.96132	-5.94142	0	0	2	0.421053	1.24793	1.7334	0.000137263
473	1	1	74	74	(916.2540537826335, 'Miss', 'Miss')	324	918.954	0	919.954	923.605	right	0.653339	0	45	1	1	80	1	sub-5	0.572	TRUE	1.46414	6.55589	-2.21496	0	0	1	0.363636	1.45943	1.72968	0.000129936
474	1	1	75	75	(926.6060760826688, 'Miss', 'Miss')	348	929.506	1	930.507	934.057	right	0.55347	0	45	1	1	80	1	sub-5	0.405143	TRUE	5.93161	9.38668	-1.62654	0	0	1	0.371795	1.42742	1.72566	0.00080415
475	1	1	76	76	(937.0581566961416, 'Miss', 'Miss')	324	939.758	0	940.759	944.293	right	0.536807	0	45	1	1	80	1	sub-5	0.467429	TRUE	1.79322	-2.84546	3.63995	0	0	1	0.379747	1.39689	1.72136	0.000757559
476	1	1	77	77	(947.293547959335, 'Miss', 'Miss')	312	949.894	1	950.894	954.561	left	0.669813	45	315	1	1	80	1	sub-5	0.498857	TRUE	0.394591	2.60017	-1.52176	0	0	2	0.4125	1.27753	1.71573	0.000113631
477	1	1	78	78	(957.5622097852279, 'Miss', 'Miss')	360	960.562	0	961.563	965.763	left	1.20418	45	315	1	1	80	1	sub-5	0.288	FALSE	0.850649	10.6023	-4.38414	0	0	2	0.419753	1.25239	1.70993	0.000609156
478	1	1	79	79	(968.7644189823279, 'Miss', 'Miss')	336	971.565	1	972.565	976.349	right	0.786428	0	45	1	1	80	1	sub-5	0.456	TRUE	0.95064	-0.97995	-0.93567	0	0	1	0.378049	1.40336	1.70606	0.000104839
479	1	1	80	80	(979.3498409557856, 'Miss', 'Miss')	324	982.05	0	983.05	986.584	right	0.536302	0	45	1	1	80	1	sub-5	0.328	FALSE	-1.96727	-5.37811	4.87963	0	0	1	0.385542	1.37504	1.70196	0.000669435
480	1	1	81	81	(989.5851872771286, 'Miss', 'Miss')	408	992.986	0	993.986	997.303	left	0.321149	45	45	0	1	20	0	sub-5	0.426857	TRUE	4.16201	-8.31856	1.74299	0	0	3	0.0952381	3.39232	1.72093	0.000875918
481	1	1	82	82	(1000.3039289719025, 'Miss', 'Miss')	372	1003.4	0	1004.4	1007.96	right	0.553684	0	45	1	1	80	1	sub-5	0.34	FALSE	1.06304	2.35691	1.65397	0	0	1	0.388235	1.365	1.71664	0.000862686
482	1	1	83	83	(1010.9560859865207, 'Miss', 'Miss')	324	1013.66	1	1014.66	1018.07	left	0.419964	45	45	0	1	20	0	sub-5	0.525143	TRUE	6.5533	7.27333	-7.26455	0	0	3	0.104651	3.25634	1.73354	0.000750515
483	1	1	84	84	(1021.0747038970133, 'Miss', 'Miss')	324	1023.77	0	1024.78	1028.29	right	0.519637	0	315	0	1	20	0	sub-5	0.488	TRUE	-1.45981	-2.58339	0.751174	0	0	0	0.091954	3.44294	1.75208	0.00148491
484	1	1	85	85	(1031.2934178499042, 'Miss', 'Miss')	312	1033.89	1	1034.89	1038.39	right	0.504346	0	315	0	1	20	0	sub-5	0.134286	FALSE	6.20081	8.85378	-5.91854	0	0	0	0.102273	3.28951	1.76857	0.00338176
485	1	1	86	86	(1041.3953473533413, 'Miss', 'Miss')	336	1044.2	0	1045.2	1049.15	right	0.954517	45	315	1	1	80	0	sub-5	0.669143	TRUE	15.0317	-8.46021	8.02835	0	0	2	0.393258	1.34645	1.76375	0.000724549
486	1	1	87	87	(1052.1475171847094, 'Miss', 'Miss')	396	1055.45	0	1056.45	1060.37	right	0.920505	0	45	1	1	80	1	sub-5	0.768	TRUE	5.16939	4.54017	-5.44855	0	0	1	0.377778	1.40439	1.75965	0.000101621
487	1	1	88	88	(1063.3663848276315, 'Miss', 'Miss')	348	1066.27	1	1067.27	1071.25	right	0.987103	0	45	1	1	80	1	sub-5	0.516571	TRUE	0.161724	1.79933	-3.8057	0	0	1	0.384615	1.37851	1.75538	0.000558942
488	1	1	89	89	(1074.251852741647, 'Miss', 'Miss')	396	1077.55	0	1078.55	1082.14	right	0.587781	0	45	1	1	80	1	sub-5	0.746286	TRUE	2.35197	5.13266	-5.58227	0	0	1	0.391304	1.35364	1.75093	0.000531559
489	1	1	90	90	(1085.1373195459876, 'Miss', 'Miss')	408	1088.54	0	1089.54	1092.86	right	0.321606	0	315	0	1	20	0	sub-5	0.587429	TRUE	5.59928	0.463887	-4.91583	0	0	0	0.107527	3.21723	1.76586	0.000622979
490	1	1	91	91	(1095.8560334988786, 'Miss', 'Miss')	396	1099.16	1	1100.16	1104.02	right	0.870078	45	315	1	1	80	0	sub-5	0.148571	FALSE	-2.28973	0.267492	0.187132	0	0	2	0.382979	1.38466	1.76172	0.000619921
491	1	1	92	92	(1107.0249710236035, 'Miss', 'Miss')	372	1110.13	1	1111.13	1114.91	right	0.786465	45	45	0	1	20	1	sub-5	0.394286	FALSE	3.03246	0.589267	-1.04379	0	0	3	0.105263	3.24793	1.77656	0.000616853
492	1	1	93	93	(1117.9104128602492, 'Miss', 'Miss')	312	1120.51	0	1121.51	1125.19	right	0.686382	45	315	1	1	80	0	sub-5	0.793143	TRUE	-1.99682	-1.13794	-1.37377	0	0	2	0.385417	1.37551	1.7723	0.000608296
493	1	1	94	94	(1128.195759764172, 'Miss', 'Miss')	384	1131.4	0	1132.4	1136.38	left	0.987238	45	315	1	1	80	1	sub-5	0.559429	TRUE	4.03861	2.83239	-4.28278	0	0	2	0.391753	1.35199	1.76789	0.0004772
494	1	1	95	95	(1139.3813127348005, 'Miss', 'Miss')	360	1142.38	0	1143.38	1146.78	right	0.403032	0	45	1	1	80	1	sub-5	0.778857	TRUE	0.543419	-1.6333	3.3727	0	0	1	0.377551	1.40526	1.76411	8.68396e-05
495	1	1	96	96	(1149.7833833334537, 'Miss', 'Miss')	408	1153.18	0	1154.18	1157.92	right	0.737181	0	45	1	1	80	1	sub-5	0.457714	TRUE	0.418845	2.39187	-4.75759	0	0	1	0.383838	1.38143	1.76017	0.000473707
496	1	1	97	97	(1160.9188438958704, 'Miss', 'Miss')	396	1164.22	1	1165.22	1168.87	left	0.653834	45	315	1	1	80	1	sub-5	0.710857	TRUE	-1.96113	-2.07899	-3.27757	0	0	2	0.39	1.35845	1.75608	8.12616e-05
497	1	1	98	98	(1171.8710693219718, 'Miss', 'Miss')	312	1174.47	1	1175.47	1179.21	left	0.737201	45	315	1	1	80	1	sub-5	0.638857	TRUE	1.49828	-5.08788	6.58842	0	0	2	0.39604	1.33628	1.75186	0.000432232
498	1	1	99	99	(1182.2063912859417, 'Miss', 'Miss')	300	1184.71	1	1185.71	1189.54	left	0.838205	0	45	1	1	80	0	sub-5	0.788571	TRUE	11.65	3.77477	1.53703	0	0	1	0.382353	1.38702	1.74821	7.6153e-05
499	1	1	100	100	(1192.5417748368916, 'Miss', 'Miss')	348	1195.44	1	1196.44	1200.11	right	0.669951	0	45	1	1	80	1	sub-5	0.568571	TRUE	1.98013	2.38037	-2.57204	0	0	1	0.38835	1.36457	1.74441	0.000429289
500	1	2	101	1	(1291.6150000915484, 'Miss', 'Miss')	408	1295.01	1	1296.01	1299.75	left	0.737738	45	315	1	1	80	1	sub-5	0.170857	FALSE	-0.975613	3.5455	-1.15949	0	0	2	0.394231	1.34289	1.74049	7.14653e-05
501	1	2	102	2	(1302.7467684867747, 'Miss', 'Miss')	372	1305.85	0	1306.85	1310.85	left	1.0046	45	45	0	1	20	0	sub-5	0.730286	TRUE	-0.936504	1.05033	-2.9083	0	0	3	0.104762	3.25481	1.75424	0.000505284
502	1	2	103	3	(1313.8489504413458, 'Miss', 'Miss')	396	1317.15	1	1318.15	1322.17	left	1.02058	45	315	1	1	80	1	sub-5	0.393714	FALSE	0.548255	1.38383	1.14985	0	0	2	0.396226	1.3356	1.75023	0.000499147
503	1	2	104	4	(1325.167793172057, 'Miss', 'Miss')	300	1327.67	1	1328.67	1332.35	left	0.687161	45	315	1	1	80	1	sub-5	0.485143	TRUE	-0.763907	2.89135	-0.842153	0	0	2	0.401869	1.3152	1.74611	0.000375773
504	1	2	105	5	(1335.3531691494727, 'Miss', 'Miss')	360	1338.35	1	1339.35	1343.12	right	0.769993	0	315	0	1	20	0	sub-5	0.548	TRUE	0.318954	0.796979	-0.833904	0	0	0	0.101852	3.29546	1.7598	0.000491034
505	1	2	106	6	(1346.1219821686275, 'Miss', 'Miss')	312	1348.72	0	1349.72	1353.39	right	0.671671	0	45	1	1	80	1	sub-5	0.386857	FALSE	-0.36769	-0.0624747	2.23755	0	0	1	0.376147	1.41063	1.75653	0.000496135
506	1	2	107	7	(1356.390647878384, 'Miss', 'Miss')	312	1358.99	1	1359.99	1363.74	left	0.753266	0	45	1	1	80	0	sub-5	0.608	TRUE	2.52806	5.95722	-2.45204	0	0	1	0.381818	1.38904	1.75312	0.000386911
507	1	2	108	8	(1366.7426499268447, 'Miss', 'Miss')	372	1369.84	1	1370.84	1375.08	right	1.23831	0	315	0	1	20	0	sub-5	0.404	TRUE	-0.218555	-0.209941	3.34936	0	0	0	0.108108	3.20945	1.76566	0.000441748
508	1	2	109	9	(1378.0782606838152, 'Miss', 'Miss')	348	1380.98	0	1381.98	1386.06	left	1.08802	45	315	1	1	80	1	sub-5	0.334857	FALSE	0.0646316	1.00271	-2.34919	0	0	2	0.392857	1.34792	1.76188	0.000433101
509	1	2	110	10	(1389.0637419694185, 'Miss', 'Miss')	360	1392.06	1	1393.06	1397.22	right	1.15482	0	315	0	1	20	0	sub-5	0.585714	TRUE	6.30648	6.34062	-4.4693	0	0	0	0.115044	3.11974	1.77337	0.000392797
510	1	2	111	11	(1400.2159089711147, 'Miss', 'Miss')	408	1403.62	1	1404.62	1408.88	left	1.26985	45	315	1	1	80	1	sub-5	0.330286	FALSE	2.75367	4.95502	-3.02281	0	0	2	0.394737	1.34104	1.76953	0.000388219
511	1	2	112	12	(1411.884921953761, 'Miss', 'Miss')	336	1414.69	0	1415.69	1419.5	right	0.820233	0	315	0	1	20	0	sub-5	0.773714	TRUE	4.70079	1.48829	-2.58549	0	0	0	0.121739	3.03814	1.78008	0.000354214
512	1	2	113	13	(1422.5035928512498, 'Miss', 'Miss')	408	1425.9	0	1426.9	1430.75	right	0.854597	0	315	0	1	20	0	sub-5	0.0828571	FALSE	1.1907	6.64295	-0.477577	0	0	0	0.12931	2.95109	1.78974	0.00146996
513	1	2	114	14	(1433.7558977855874, 'Miss', 'Miss')	396	1437.06	1	1438.06	1441.66	left	0.604689	45	315	1	1	80	1	sub-5	0.529714	TRUE	4.05551	2.09847	-1.76237	0	0	2	0.393162	1.3468	1.78591	0.00032112
514	1	2	115	15	(1444.6580249776816, 'Miss', 'Miss')	312	1447.26	1	1448.26	1451.76	right	0.5029	0	45	1	1	80	1	sub-5	0.856	TRUE	-0.615265	2.44775	-1.39898	0	0	1	0.364407	1.45638	1.78305	6.46547e-05
515	1	2	116	16	(1454.7600077455338, 'Miss', 'Miss')	348	1457.66	1	1458.66	1462.19	left	0.538229	45	315	1	1	80	1	sub-5	0.651429	TRUE	3.59267	3.73541	-5.0043	0	0	2	0.394958	1.34023	1.77928	6.30968e-05
516	1	2	117	17	(1465.195366106854, 'Miss', 'Miss')	348	1468.1	0	1469.1	1472.78	left	0.687186	45	315	1	1	80	1	sub-5	0.584	TRUE	-2.47563	1.87145	0.363402	0	0	2	0.4	1.32193	1.77543	0.000301044
517	1	2	118	18	(1475.780797512552, 'Miss', 'Miss')	360	1478.78	1	1479.78	1483.6	right	0.81996	0	45	1	1	80	1	sub-5	0.291429	FALSE	5.82142	3.60187	-3.53032	0	0	1	0.363636	1.45943	1.77276	5.97033e-05
518	1	2	119	19	(1486.5996130562178, 'Miss', 'Miss')	312	1489.2	0	1490.2	1493.78	left	0.586662	45	315	1	1	80	1	sub-5	0.806286	TRUE	0.0441303	-2.22635	-0.367088	0	0	2	0.401639	1.31603	1.76897	5.83562e-05
519	1	2	120	20	(1496.7849504724165, 'Miss', 'Miss')	300	1499.29	1	1500.29	1505	right	1.72155	45	45	0	1	20	1	sub-5	0.652571	TRUE	0.439006	-1.14867	6.80378	0	0	3	0.097561	3.35755	1.78136	0.000400068
520	1	2	121	21	(1508.0038195024329, 'Miss', 'Miss')	312	1510.6	0	1511.6	1515.17	left	0.56998	45	315	1	1	80	1	sub-5	0.744	TRUE	3.75414	3.18886	-7.07479	0	0	2	0.403226	1.31034	1.77752	0.000396065
521	1	2	122	22	(1518.1724693438325, 'Miss', 'Miss')	360	1521.17	1	1522.17	1526.29	right	1.12048	45	315	1	1	80	0	sub-5	0.397714	FALSE	5.89828	-0.0771694	5.07986	0	0	2	0.408	1.29336	1.77361	0.000268319
522	1	2	123	23	(1529.2913188990467, 'Miss', 'Miss')	372	1532.39	1	1533.39	1536.94	right	0.554829	0	45	1	1	80	1	sub-5	0.528571	TRUE	2.65758	1.24958	0.29288	0	0	1	0.357143	1.48543	1.77126	5.51499e-05
523	1	2	124	24	(1539.943427642789, 'Miss', 'Miss')	408	1543.34	1	1544.34	1548.04	right	0.70396	0	45	1	1	80	1	sub-5	0.248	FALSE	3.24815	3.47462	-0.506207	0	0	1	0.362205	1.46512	1.76879	0.000315709
524	1	2	125	25	(1551.0456001651198, 'Miss', 'Miss')	408	1554.45	0	1555.45	1559.36	right	0.919991	0	45	1	1	80	1	sub-5	0.618286	TRUE	-2.81411	-4.99449	0.657844	0	0	1	0.367188	1.44541	1.76621	0.000304146
525	1	2	126	26	(1562.3645316698562, 'Miss', 'Miss')	348	1565.26	0	1566.26	1569.58	right	0.321544	0	45	1	1	80	1	sub-5	0.590286	TRUE	0.243169	0.419732	-3.36706	0	0	1	0.372093	1.42626	1.76353	0.000293176
526	1	2	127	27	(1572.5831543519525, 'Miss', 'Miss')	384	1575.78	0	1576.78	1579.8	left	0.0200879	45	315	1	1	80	1	sub-5	0.800571	TRUE	-1.90559	-0.167267	3.37727	0	0	2	0.4	1.32193	1.76009	4.92833e-05
527	1	2	128	28	(1582.8018855048108, 'Miss', 'Miss')	336	1585.6	1	1586.6	1590.14	right	0.536922	0	45	1	1	80	1	sub-5	0.757714	TRUE	1.34614	3.91598	-3.29426	0	0	1	0.374046	1.41871	1.75744	4.79082e-05
528	1	2	129	29	(1593.1372568493323, 'Miss', 'Miss')	396	1596.44	0	1597.44	1600.82	left	0.386758	45	315	1	1	80	1	sub-5	0.332571	FALSE	2.50435	0.989247	-0.47075	0	0	2	0.401515	1.31647	1.75406	4.68657e-05
529	1	2	130	30	(1603.8226450331765, 'Miss', 'Miss')	300	1606.32	1	1607.32	1610.51	right	0.187866	0	45	1	1	80	1	sub-5	0	FALSE	-2.03283	2.09769	1.72186	0	0	1	0.37594	1.41143	1.75144	4.55806e-05
530	1	2	131	31	(1613.5078831334347, 'Miss', 'Miss')	324	1616.21	1	1617.21	1620.61	right	0.404771	0	45	1	1	80	1	sub-5	0.821714	TRUE	0.0418353	2.92239	-4.63238	0	0	1	0.380597	1.39366	1.74872	0.000261975
531	1	2	132	32	(1623.609871727082, 'Miss', 'Miss')	360	1626.61	1	1627.61	1631.21	right	0.604033	0	45	1	1	80	1	sub-5	0.588	TRUE	-2.3065	-4.42935	3.08068	0	0	1	0.385185	1.37638	1.74592	0.000253121
532	1	2	133	33	(1634.2119604689267, 'Miss', 'Miss')	408	1637.61	1	1638.61	1642	left	0.388227	45	315	1	1	80	1	sub-5	0.602857	TRUE	-0.46474	1.94549	-0.948184	0	0	2	0.397059	1.33258	1.74285	4.2278e-05
533	1	2	134	34	(1644.9974030823453, 'Miss', 'Miss')	384	1648.2	1	1649.2	1652.58	left	0.388135	45	45	0	1	20	0	sub-5	0.788571	TRUE	1.55635	-0.738169	-2.8368	0	0	3	0.0948905	3.39759	1.75448	0.000335373
534	1	2	135	35	(1655.5828267203158, 'Miss', 'Miss')	324	1658.28	1	1659.28	1662.7	left	0.420189	45	315	1	1	80	1	sub-5	0.142857	FALSE	7.41005	3.68592	-0.976426	0	0	2	0.398551	1.32716	1.75135	0.000332338
535	1	2	136	36	(1665.7015006694116, 'Miss', 'Miss')	312	1668.3	1	1669.3	1672.59	right	0.287796	0	45	1	1	80	1	sub-5	0.604	TRUE	-1.17392	4.44015	0.864649	0	0	1	0.381295	1.39102	1.74872	4.10987e-05
536	1	2	137	37	(1675.5867580225365, 'Miss', 'Miss')	372	1678.69	0	1679.69	1683.34	left	0.653715	45	315	1	1	80	1	sub-5	0.956	TRUE	-0.703553	-1.301	3.21932	0	0	2	0.4	1.32193	1.74564	4.02226e-05
537	1	2	138	38	(1686.3389145378007, 'Miss', 'Miss')	384	1689.54	1	1690.54	1693.79	right	0.254778	0	45	1	1	80	1	sub-5	0.513714	TRUE	-1.04197	2.11247	-3.38028	0	0	1	0.382979	1.38466	1.74304	3.92205e-05
538	1	2	139	39	(1696.790930235268, 'Miss', 'Miss')	300	1699.29	0	1700.29	1704.11	left	0.821177	45	315	1	1	80	1	sub-5	0.772571	TRUE	5.49871	10.648	-6.39266	0	0	2	0.401408	1.31686	1.74001	3.83969e-05
539	1	2	140	40	(1707.1096830822787, 'Miss', 'Miss')	396	1710.41	0	1711.41	1714.68	right	0.26968	0	45	1	1	80	1	sub-5	0.440571	TRUE	2.42431	0.87154	-0.0778611	0	0	1	0.384615	1.37851	1.73744	3.74554e-05
540	1	2	141	41	(1717.6783877971227, 'Miss', 'Miss')	348	1720.58	0	1721.58	1724.8	left	0.220276	45	315	1	1	80	1	sub-5	0.876	TRUE	1.34909	4.65978	-2.81979	0	0	2	0.402778	1.31194	1.73446	3.66804e-05
541	1	2	142	42	(1727.7970481526957, 'Miss', 'Miss')	396	1731.1	0	1732.1	1735.5	left	0.403944	45	315	1	1	80	1	sub-5	0.409714	TRUE	2.88135	3.52458	1.1365	0	0	2	0.406897	1.29727	1.73141	0.000200278
542	1	2	143	43	(1738.4991300145537, 'Miss', 'Miss')	408	1741.9	0	1742.9	1746.67	right	0.770058	0	45	1	1	80	1	sub-5	0.381714	FALSE	6.51449	8.69272	-7.30807	0	0	1	0.383562	1.38247	1.72898	3.50651e-05
543	1	2	144	44	(1749.6680029006914, 'Miss', 'Miss')	324	1752.37	0	1753.37	1757	left	0.637687	45	315	1	1	80	1	sub-5	0.571429	TRUE	-0.671742	-2.94848	0.600698	0	0	2	0.408163	1.29278	1.72599	3.43791e-05
544	1	2	145	45	(1760.003380625846, 'Miss', 'Miss')	408	1763.4	1	1764.4	1767.95	right	0.5544	0	45	1	1	80	1	sub-5	0.819429	TRUE	4.95217	5.88453	-2.14406	0	0	1	0.385135	1.37656	1.72359	3.35435e-05
545	1	2	146	46	(1770.9555366972402, 'Miss', 'Miss')	396	1774.26	1	1775.26	1778.86	right	0.603561	0	315	0	1	20	0	sub-5	0.398286	FALSE	-2.794	1.58254	-2.02256	0	0	0	0.107383	3.21917	1.7333	0.000248976
546	1	2	147	47	(1781.857668050617, 'Miss', 'Miss')	360	1784.86	0	1785.86	1789.41	right	0.553681	0	315	0	1	20	0	sub-5	0.792	TRUE	1.73018	4.36219	-4.4216	0	0	0	0.113333	3.14136	1.74238	0.00101974
547	1	2	148	48	(1792.4097750743624, 'Miss', 'Miss')	396	1795.71	0	1796.71	1800.51	left	0.804846	45	315	1	1	80	1	sub-5	0.481714	TRUE	3.64208	2.79897	0.149301	0	0	2	0.403974	1.30767	1.73948	0.000225224
548	1	2	149	49	(1803.5119498160436, 'Miss', 'Miss')	336	1806.31	0	1807.31	1810.73	right	0.421012	0	45	1	1	80	1	sub-5	0.489143	TRUE	4.07027	-0.318272	-0.451216	0	0	1	0.381579	1.38995	1.73714	3.3351e-05
549	1	2	150	50	(1813.7306288141624, 'Miss', 'Miss')	348	1816.63	1	1817.63	1821.62	right	0.98665	0	315	0	1	20	0	sub-5	0.452	TRUE	8.64623	-1.96073	-0.426002	0	0	0	0.117647	3.08746	1.74568	0.000213109
550	1	2	151	51	(1824.6160972830155, 'Miss', 'Miss')	408	1828.02	1	1829.02	1832.8	right	0.787272	0	45	1	1	80	1	sub-5	0.686286	TRUE	0.414148	-3.03389	-2.04851	0	0	1	0.383117	1.38414	1.7433	0.000211183
551	1	2	152	52	(1835.801637769797, 'Miss', 'Miss')	324	1838.5	0	1839.5	1842.94	right	0.437196	0	315	0	1	20	0	sub-5	0.627429	TRUE	4.47808	1.63735	1.98051	0	0	0	0.122581	3.0282	1.75133	0.000197555
552	1	2	153	53	(1845.9369610098936, 'Miss', 'Miss')	324	1848.64	1	1849.64	1853.62	right	0.987253	0	45	1	1	80	1	sub-5	0.394857	FALSE	11.2154	9.2027	-5.0524	0	0	1	0.384615	1.37851	1.74891	0.000195777
553	1	2	154	54	(1856.622404954922, 'Miss', 'Miss')	360	1859.62	0	1860.62	1864.41	right	0.788033	0	45	1	1	80	1	sub-5	1	TRUE	0.0467587	0.116302	-0.47706	0	0	1	0.388535	1.36388	1.74643	0.000184473
554	1	2	155	55	(1867.407853948974, 'Miss', 'Miss')	384	1870.61	1	1871.61	1875.08	left	0.4698	45	45	0	1	20	0	sub-5	0.864	TRUE	5.08773	1.46828	2.38516	0	0	3	0.0886076	3.49643	1.75715	0.000275475
555	1	2	156	56	(1878.0766000547071, 'Miss', 'Miss')	408	1881.48	0	1882.48	1885.99	right	0.520334	0	45	1	1	80	1	sub-5	0.511429	TRUE	0.862008	-2.16429	-0.941325	0	0	1	0.389937	1.35869	1.75461	0.000273295
556	1	2	157	57	(1888.9953709894255, 'Miss', 'Miss')	348	1891.9	0	1892.9	1896.55	right	0.654825	0	315	0	1	20	0	sub-5	0.514857	TRUE	5.06189	6.21051	3.06844	0	0	0	0.125	3	1.76215	0.000180012
557	1	2	158	58	(1899.5474968776514, 'Miss', 'Miss')	324	1902.25	0	1903.25	1906.73	right	0.488148	0	45	1	1	80	1	sub-5	0.527429	TRUE	-2.57418	-8.08203	4.08273	0	0	1	0.391304	1.35364	1.75959	0.000178467
558	1	2	159	59	(1909.7328001713338, 'Miss', 'Miss')	360	1912.73	0	1913.73	1917.22	left	0.487083	45	315	1	1	80	1	sub-5	0.593143	TRUE	5.91347	8.59121	-5.99417	0	0	2	0.382716	1.38565	1.75725	3.13774e-05
559	1	2	160	60	(1920.2182309667103, 'Miss', 'Miss')	324	1922.92	1	1923.92	1927.47	left	0.554002	45	45	0	1	20	0	sub-5	0.773143	TRUE	-2.28501	-1.22978	-4.74806	0	0	3	0.0920245	3.44184	1.76726	0.000249328
560	1	2	161	61	(1930.4702024436162, 'Miss', 'Miss')	300	1932.97	1	1933.97	1937.47	right	0.503373	0	45	1	1	80	1	sub-5	0.485143	TRUE	7.00023	3.45965	1.13153	0	0	1	0.390244	1.35755	1.76474	0.000246293
561	1	2	162	62	(1940.4721651818288, 'Miss', 'Miss')	300	1942.97	0	1943.97	1947.41	right	0.436848	0	45	1	1	80	1	sub-5	0.136571	FALSE	0.80976	-0.512389	2.35755	0	0	1	0.393939	1.34395	1.76216	0.000163247
562	1	2	163	63	(1950.4075016270615, 'Miss', 'Miss')	396	1953.71	0	1954.71	1958.24	left	0.537546	45	45	0	1	20	0	sub-5	0.413143	TRUE	-3.21503	-3.57916	-1.18662	0	0	3	0.0963855	3.37504	1.77158	0.000226332
563	1	2	164	64	(1961.2429498165986, 'Miss', 'Miss')	348	1964.14	0	1965.14	1968.64	right	0.503434	0	45	1	1	80	1	sub-5	0.668571	TRUE	2.11531	6.50789	-6.7007	0	0	1	0.39521	1.33931	1.76897	0.000224616
564	1	2	165	65	(1971.6449776927523, 'Miss', 'Miss')	348	1974.55	0	1975.55	1978.95	right	0.404792	0	45	1	1	80	1	sub-5	0.598286	TRUE	5.61174	5.81468	3.45433	0	0	1	0.39881	1.32623	1.76631	0.000154283
565	1	2	166	66	(1981.9470027392338, 'Miss', 'Miss')	312	1984.55	1	1985.55	1989.25	left	0.703064	45	315	1	1	80	1	sub-5	0.287429	FALSE	3.13387	10.3367	-2.16361	0	0	2	0.372781	1.4236	1.76426	2.93875e-05
566	1	2	167	67	(1992.2490768888476, 'Miss', 'Miss')	300	1994.75	0	1995.75	1999.37	right	0.620526	0	45	1	1	80	1	sub-5	0.383429	FALSE	-1.22082	-4.59113	4.91951	0	0	1	0.4	1.32193	1.76163	2.88885e-05
567	1	2	168	68	(2002.367687309032, 'Miss', 'Miss')	372	2005.47	0	2006.47	2009.77	left	0.303062	45	45	0	1	20	0	sub-5	0.728571	TRUE	-0.598836	2.50725	-2.35537	0	0	3	0.0994152	3.33039	1.77054	0.000205079
568	1	2	169	69	(2012.769753468984, 'Miss', 'Miss')	324	2015.47	0	2016.47	2019.75	right	0.286392	0	45	1	1	80	1	sub-5	0.292	FALSE	0.218668	-1.18687	5.89113	0	0	1	0.401163	1.31774	1.76788	0.000203583
569	1	2	170	70	(2022.7550902193773, 'Miss', 'Miss')	348	2025.66	0	2026.66	2029.96	left	0.304292	45	315	1	1	80	1	sub-5	0.561143	TRUE	-1.76342	2.6253	-4.91589	0	0	2	0.369942	1.43463	1.76593	2.8196e-05
570	1	2	171	71	(2032.9569753912854, 'Miss', 'Miss')	396	2036.26	1	2037.26	2040.64	left	0.387572	45	315	1	1	80	1	sub-5	0.344571	FALSE	-0.520513	2.76428	0.433029	0	0	2	0.373563	1.42058	1.76391	0.000160041
571	1	2	172	72	(2043.6424920200473, 'Miss', 'Miss')	300	2046.14	1	2047.14	2050.66	right	0.521622	0	45	1	1	80	1	sub-5	0.561714	TRUE	-3.41105	-1.97917	5.9058	0	0	1	0.4	1.32193	1.76137	2.71471e-05
572	1	2	173	73	(2053.6611476040166, 'Miss', 'Miss')	312	2056.26	1	2057.26	2060.53	left	0.270367	45	315	1	1	80	1	sub-5	0.528571	TRUE	-6.01572	-8.39245	4.1232	0	0	2	0.375	1.41504	1.75937	2.65846e-05
573	1	2	174	74	(2063.5297026791445, 'Miss', 'Miss')	336	2066.33	0	2067.33	2070.86	left	0.536941	45	315	1	1	80	1	sub-5	0.596	TRUE	-0.853297	-2.33888	4.50252	0	0	2	0.378531	1.40152	1.75732	0.000151407
574	1	2	175	75	(2073.8651084236008, 'Miss', 'Miss')	300	2076.37	1	2077.37	2081.03	left	0.670949	45	315	1	1	80	1	sub-5	0.475429	TRUE	-1.59152	2.15127	1.57571	0	0	2	0.382022	1.38827	1.75523	0.000147501
575	1	2	176	76	(2084.0337136005687, 'Miss', 'Miss')	336	2086.83	1	2087.83	2091.52	right	0.68753	0	45	1	1	80	1	sub-5	0.137714	FALSE	-2.50129	-5.27759	2.88645	0	0	1	0.396648	1.33407	1.75285	2.51067e-05
576	1	2	177	77	(2094.5191468927146, 'Miss', 'Miss')	384	2097.72	1	2098.72	2102.17	right	0.453341	0	45	1	1	80	1	sub-5	0.140571	FALSE	-0.812334	2.73423	0.261715	0	0	1	0.4	1.32193	1.75044	0.000133719
577	1	2	178	78	(2105.171276442869, 'Miss', 'Miss')	324	2107.87	1	2108.87	2112.44	right	0.569624	0	45	1	1	80	1	sub-5	0.430857	TRUE	-1.18152	-0.882424	-2.98604	0	0	1	0.403315	1.31002	1.74799	0.000130428
578	1	2	179	79	(2115.4399171849313, 'Miss', 'Miss')	408	2118.84	0	2119.84	2123.57	right	0.737075	0	45	1	1	80	1	sub-5	0.806857	TRUE	1.30605	-2.2826	-1.07741	0	0	1	0.406593	1.29834	1.7455	0.00012725
579	1	2	180	80	(2126.5754623600906, 'Miss', 'Miss')	372	2129.68	1	2130.68	2134.36	left	0.686995	45	315	1	1	80	1	sub-5	0.661143	TRUE	-3.1478	-3.00063	0.922282	0	0	2	0.377049	1.40718	1.74362	2.34373e-05
580	1	2	181	81	(2137.360824522049, 'Miss', 'Miss')	360	2140.36	0	2141.36	2144.93	left	0.569824	45	315	1	1	80	1	sub-5	0.521714	TRUE	4.73032	-3.60343	1.82978	0	0	2	0.380435	1.39428	1.7417	0.000138967
581	1	2	182	82	(2147.92967432694, 'Miss', 'Miss')	396	2151.23	0	2152.23	2155.7	right	0.470295	0	45	1	1	80	1	sub-5	0.228571	FALSE	1.16619	-11.0107	5.67151	0	0	1	0.405405	1.30256	1.73931	2.26171e-05
582	1	2	183	83	(2158.698402733352, 'Miss', 'Miss')	300	2161.2	1	2162.2	2165.78	left	0.587986	45	315	1	1	80	1	sub-5	0.566857	TRUE	1.91538	6.31033	-5.57874	0	0	2	0.38172	1.38941	1.73741	2.21773e-05
583	1	2	184	84	(2168.7837004231747, 'Miss', 'Miss')	300	2171.28	0	2172.28	2175.85	left	0.569974	45	45	0	1	20	0	sub-5	0.333714	FALSE	7.43178	3.99659	-2.79579	0	0	3	0.0962567	3.37697	1.74594	0.000180891
584	1	2	185	85	(2178.8523629703564, 'Miss', 'Miss')	324	2181.55	0	2182.55	2186.39	left	0.83652	45	315	1	1	80	1	sub-5	0.816	TRUE	-2.70478	-5.34297	-0.147178	0	0	2	0.382979	1.38466	1.74399	0.00017963
585	1	2	186	86	(2189.3877310968196, 'Miss', 'Miss')	360	2192.39	1	2193.39	2196.97	left	0.587484	45	315	1	1	80	1	sub-5	0.490857	TRUE	1.07563	-7.91582	11.6486	0	0	2	0.386243	1.37242	1.74201	0.000128501
586	1	2	187	87	(2199.9731666638, 'Miss', 'Miss')	408	2203.37	1	2204.37	2207.72	left	0.353204	45	315	1	1	80	1	sub-5	0.773714	TRUE	2.26777	1.00936	-4.81657	0	0	2	0.389474	1.3604	1.73998	0.000125428
587	1	2	188	88	(2210.725315688756, 'Miss', 'Miss')	408	2214.13	0	2215.13	2218.58	right	0.453363	0	45	1	1	80	1	sub-5	0.628571	TRUE	-0.0508666	-3.34257	-1.76024	0	0	1	0.397906	1.3295	1.73781	2.09434e-05
588	1	2	189	89	(2221.5774375821507, 'Miss', 'Miss')	336	2224.38	0	2225.38	2228.96	right	0.586632	0	45	1	1	80	1	sub-5	0.418857	TRUE	-7.56214	-5.60944	5.28343	0	0	1	0.401042	1.31818	1.73561	0.000117009
589	1	2	190	90	(2231.9627723351286, 'Miss', 'Miss')	312	2234.56	1	2235.56	2239.03	left	0.470634	45	315	1	1	80	1	sub-5	0.66	TRUE	-5.07262	-2.41267	1.88641	0	0	2	0.388601	1.36364	1.73366	2.02433e-05
590	1	2	191	91	(2242.0314556887224, 'Miss', 'Miss')	312	2244.63	0	2245.63	2249.23	left	0.604304	45	315	1	1	80	1	sub-5	0.277143	FALSE	-1.67523	-0.75678	6.56522	0	0	2	0.391753	1.35199	1.73167	0.000119157
591	1	2	192	92	(2252.233474853925, 'Miss', 'Miss')	372	2255.33	0	2256.33	2260.05	left	0.720452	45	315	1	1	80	1	sub-5	0.429714	TRUE	1.46917	9.50923	-6.87249	0	0	2	0.394872	1.34054	1.72965	0.000116401
592	1	2	193	93	(2263.052233526731, 'Miss', 'Miss')	324	2265.75	0	2266.75	2270.27	right	0.520123	0	45	1	1	80	1	sub-5	0	FALSE	-1.65326	-4.99797	-2.01138	0	0	1	0.397959	1.32931	1.72759	1.9239e-05
593	1	2	194	94	(2273.270922234509, 'Miss', 'Miss')	336	2276.07	1	2277.07	2280.44	left	0.369757	45	315	1	1	80	1	sub-5	0.558286	TRUE	3.42261	5.02711	5.89718	0	0	2	0.395939	1.33665	1.72559	1.89191e-05
594	1	2	195	95	(2283.43958123073, 'Miss', 'Miss')	384	2286.64	0	2287.64	2291.32	left	0.688332	45	315	1	1	80	1	sub-5	0.754857	TRUE	2.10983	1.23041	-2.84154	0	0	2	0.39899	1.32558	1.72355	0.000110968
595	1	2	196	96	(2294.3250616285927, 'Miss', 'Miss')	408	2297.73	1	2298.73	2302.18	left	0.453059	45	315	1	1	80	1	sub-5	0.676	TRUE	0.474845	-1.59553	-0.184507	0	0	2	0.40201	1.3147	1.72148	0.000108478
596	1	2	197	97	(2305.177221250948, 'Miss', 'Miss')	372	2308.28	1	2309.28	2312.9	left	0.62134	45	45	0	1	20	0	sub-5	0.72	TRUE	-0.246849	8.59314	-1.28994	0	0	3	0.095	3.39593	1.72964	0.000158433
597	1	2	198	98	(2315.8959410296343, 'Miss', 'Miss')	396	2319.2	0	2320.2	2323.48	right	0.286703	0	45	1	1	80	1	sub-5	0.430857	TRUE	2.90861	4.79132	-6.2924	0	0	1	0.393035	1.34727	1.72772	0.000158565
598	1	2	199	99	(2326.4813444160304, 'Miss', 'Miss')	384	2329.68	0	2330.68	2334.18	left	0.504597	45	45	0	1	20	0	sub-5	0.558857	TRUE	2.68964	4.285	-3.18629	0	0	3	0.0990099	3.33628	1.73549	0.000149092
599	1	2	200	100	(2337.1834476391377, 'Miss', 'Miss')	396	2340.48	1	2341.48	2345.3	right	0.820785	0	45	1	1	80	1	sub-5	0.793714	TRUE	0.686906	-3.9427	-4.01138	0	0	1	0.394089	1.34341	1.73354	0.000148153
600	1	1	1	1	(84.80497793392271, 'Miss', 'Miss')	372	87.9074	1	88.9075	94.7254	left	2.82009	45	45	1	1	80	0	sub-7	0.401143	TRUE	-3.63656	-4.53456	8.62304	0	0	3	0.25	2	1.92193	0.0780719
601	1	1	2	2	(97.72641892589195, 'Miss', 'Miss')	312	100.327	1	101.327	105.511	left	1.18719	0	315	1	1	80	1	sub-7	0.117714	FALSE	-11.982	-6.77513	7.26661	0	0	0	0.2	2.32193	1.9183	0.0817042
602	1	1	3	3	(108.51195019291868, 'Miss', 'Miss')	300	111.012	1	112.012	115.23	left	0.220105	0	315	1	1	80	1	sub-7	0	FALSE	1.07788	0.260123	-4.32022	0	0	0	0.333333	1.58496	1.84237	0.193843
603	1	1	4	4	(118.23066624350702, 'Miss', 'Miss')	408	121.631	1	122.631	125.732	left	0.10472	0	315	1	1	80	1	sub-7	0	FALSE	1.15485	-2.6542	2.94033	0	0	0	0.428571	1.22239	1.75	0.0849625
604	1	1	5	5	(128.7327194373455, 'Miss', 'Miss')	300	131.233	1	132.233	135.5	left	0.270185	0	315	1	1	80	1	sub-7	0	FALSE	-7.5558	-17.1858	2.08387	0	0	0	0.5	1	1.65774	0.0468553
605	1	1	6	6	(138.50143870601903, 'Miss', 'Miss')	348	141.402	0	142.402	145.953	left	0.554782	0	45	0	1	20	0	sub-7	0	FALSE	1.76287	-0.496552	-2.06321	0	0	1	0.111111	3.16993	1.76096	0.039036
606	1	1	7	7	(148.95357495974622, 'Miss', 'Miss')	384	152.154	1	153.154	157.305	right	1.15399	45	45	1	1	80	1	sub-7	0.118857	FALSE	-1.07509	-20.3218	1.81883	0	0	3	0.2	2.32193	1.78993	0.0518468
607	1	1	8	8	(160.30590035920488, 'Miss', 'Miss')	348	163.206	1	164.206	167.424	left	0.220963	0	45	0	1	20	0	sub-7	0	FALSE	0.663651	-7.53314	5.55167	0	0	1	0.181818	2.45943	1.82501	0.0294468
608	1	1	9	9	(170.42464159963242, 'Miss', 'Miss')	348	173.325	0	174.325	178.109	right	0.787609	0	315	1	1	80	0	sub-7	0	FALSE	-2.14074	-9.69089	9.33432	0	0	0	0.416667	1.26303	1.77586	0.0153837
609	1	1	10	10	(181.1102074888172, 'Miss', 'Miss')	300	183.61	1	184.611	188.195	right	0.586619	0	45	0	1	20	1	sub-7	0	FALSE	-2.76069	5.55534	3.8205	0	0	1	0.230769	2.11548	1.78845	0.00891875
610	1	1	11	11	(191.1955696954027, 'Miss', 'Miss')	360	194.196	0	195.196	198.88	left	0.686543	0	315	1	1	80	1	sub-7	0.194286	FALSE	-5.08653	-19.8595	9.55733	0	0	0	0.428571	1.22239	1.74647	0.00800892
611	1	1	12	12	(201.8811211586882, 'Miss', 'Miss')	360	204.881	1	205.882	209.416	right	0.537261	45	315	0	1	20	0	sub-7	0.297714	FALSE	10.1775	6.08022	-15.2097	0	0	2	0.0666667	3.90689	1.8496	0.0296516
612	1	1	13	13	(212.41662801265488, 'Miss', 'Miss')	360	215.417	0	216.417	220.551	right	1.13819	0	315	1	1	80	0	sub-7	0.485143	TRUE	-3.75883	4.88054	-6.22968	0	0	0	0.4375	1.19265	1.80776	0.0277313
613	1	1	14	14	(223.55228167788744, 'Miss', 'Miss')	300	226.052	0	227.053	231.087	right	1.03798	45	45	1	1	80	1	sub-7	0.863429	TRUE	-0.0710291	-0.781072	2.83808	0	0	3	0.176471	2.5025	1.83659	0.00792559
614	1	1	15	15	(234.0877574606867, 'Miss', 'Miss')	348	236.988	1	237.988	241.572	left	0.586789	45	45	1	1	80	0	sub-7	0.648	TRUE	5.80705	3.09066	-7.58514	0	0	3	0.222222	2.16993	1.84742	0.0334736
615	1	1	16	16	(244.5732153220804, 'Miss', 'Miss')	348	247.473	0	248.474	252.491	left	1.02071	45	315	0	1	20	1	sub-7	0.352	FALSE	2.38168	0.610607	4.48114	0	0	2	0.105263	3.24793	1.9037	0.0162233
616	1	1	17	17	(255.49211513643013, 'Miss', 'Miss')	396	258.792	0	259.793	264.11	left	1.32094	0	315	1	1	80	1	sub-7	0.0902857	FALSE	2.07274	7.1306	-2.20764	0	0	0	0.4	1.32193	1.87356	0.0120012
617	1	1	18	18	(267.1112023210162, 'Miss', 'Miss')	372	270.212	1	271.212	275.046	left	0.836382	0	315	1	1	80	1	sub-7	0.0537143	FALSE	1.53559	4.20919	-3.78726	0	0	0	0.428571	1.22239	1.84199	0.00882743
618	1	1	19	19	(278.04675628109203, 'Miss', 'Miss')	324	280.747	0	281.747	285.015	right	0.270337	45	45	1	1	80	1	sub-7	0.739429	TRUE	-0.349071	-0.864393	1.72219	0	0	3	0.227273	2.1375	1.85035	0.00346144
619	1	1	20	20	(288.01554751280855, 'Miss', 'Miss')	396	291.316	1	292.316	296.867	right	1.55369	45	45	1	1	80	1	sub-7	0.226286	FALSE	-4.65563	-7.24095	7.74556	0	0	3	0.26087	1.9386	1.85056	0.0160519
620	1	1	21	21	(299.8679297836004, 'Miss', 'Miss')	324	302.568	0	303.568	307.519	left	0.953792	45	45	1	1	80	0	sub-7	0.508571	TRUE	-3.68002	-10.7451	-1.93322	0	0	3	0.291667	1.77761	1.84489	0.0125178
621	1	1	22	22	(310.5201097034146, 'Miss', 'Miss')	360	313.52	0	314.521	317.938	right	0.420868	45	45	1	1	80	1	sub-7	0.643429	TRUE	-0.266435	6.72828	-1.66354	0	0	3	0.32	1.64386	1.83492	0.0100278
622	1	1	23	23	(320.9389606916443, 'Miss', 'Miss')	360	323.939	0	324.939	328.573	right	0.637542	45	45	1	1	80	1	sub-7	0.265143	FALSE	4.41508	15.19	-9.58442	0	0	3	0.346154	1.53051	1.8218	0.00820132
623	1	1	24	24	(331.5744107297619, 'Miss', 'Miss')	384	334.775	1	335.775	340.276	left	1.50316	0	315	1	1	80	1	sub-7	0.252571	FALSE	-5.21808	-7.15783	4.52233	0	0	0	0.37037	1.43296	1.80636	0.00139086
624	1	1	25	25	(343.2768621339012, 'Miss', 'Miss')	360	346.277	1	347.277	351.078	right	0.80327	45	45	1	1	80	1	sub-7	0.584571	TRUE	0.931371	6.4087	-8.49075	0	0	3	0.357143	1.48543	1.79376	0.00121953
625	1	1	26	26	(354.0790611402897, 'Miss', 'Miss')	384	357.279	1	358.28	361.914	left	0.637303	0	315	1	1	80	1	sub-7	0	FALSE	3.38334	10.431	-1.53263	0	0	0	0.37931	1.39855	1.77928	0.00109464
626	1	1	27	27	(364.9146341869398, 'Miss', 'Miss')	408	368.315	0	369.315	372.833	right	0.521068	45	45	1	1	80	1	sub-7	0.521143	TRUE	9.99569	16.3257	-11.5132	0	0	3	0.366667	1.44746	1.76729	0.000969884
627	1	1	28	28	(375.8335140269676, 'Miss', 'Miss')	408	379.234	0	380.234	383.651	left	0.42061	0	315	1	1	80	1	sub-7	0	FALSE	7.79163	13.4106	-9.82057	0	0	0	0.387097	1.36923	1.75375	0.000877296
628	1	1	29	29	(386.65248230885413, 'Miss', 'Miss')	384	389.853	1	390.853	394.12	left	0.271151	0	45	0	1	20	0	sub-7	0.110286	FALSE	9.60975	-1.42545	-2.01208	0	0	1	0.125	3	1.78713	0.0040702
629	1	1	30	30	(397.1212455210357, 'Miss', 'Miss')	324	399.821	1	400.822	404.506	right	0.686866	45	315	0	1	20	0	sub-7	0.183429	FALSE	-1.95108	-0.972071	1.02994	0	0	2	0.0909091	3.45943	1.83055	0.00870747
630	1	1	31	31	(407.50671581089637, 'Miss', 'Miss')	324	410.207	1	411.207	414.791	right	0.586644	0	315	1	1	80	0	sub-7	0	FALSE	8.28195	3.54328	2.19759	0	0	0	0.382353	1.38702	1.81694	0.00531004
631	1	1	32	32	(417.7921657935299, 'Miss', 'Miss')	360	420.792	0	421.793	425.627	left	0.836536	0	315	1	1	80	1	sub-7	0.118286	FALSE	-6.45939	-5.44997	6.75787	0	0	0	0.4	1.32193	1.80235	0.00355904
632	1	1	33	33	(428.6277565951327, 'Miss', 'Miss')	300	431.128	0	432.128	436.029	right	0.903436	45	45	1	1	80	1	sub-7	0.137143	FALSE	0.907245	2.82403	0.550428	0	0	3	0.333333	1.58496	1.79543	0.000755028
633	1	1	34	34	(439.02984108207556, 'Miss', 'Miss')	408	442.43	0	443.43	446.914	right	0.486539	45	45	1	1	80	1	sub-7	0.116571	FALSE	-1.18362	1.4599	-2.33253	0	0	3	0.351351	1.50901	1.78698	0.00393154
634	1	1	35	35	(449.9154270565507, 'Miss', 'Miss')	408	453.316	1	454.316	457.867	right	0.5534	45	45	1	1	80	1	sub-7	0.189714	FALSE	-3.10045	3.04994	-0.868512	0	0	3	0.368421	1.44057	1.77729	0.00345533
635	1	1	36	36	(460.8676556915166, 'Miss', 'Miss')	324	463.568	1	464.568	491.39	right	23.8253	45	45	1	1	80	1	sub-7	0.214857	FALSE	-0.626024	0.93441	9.47522	1	1	3	0.384615	1.37851	1.7666	0.00305745
636	1	1	37	37	(494.39120735898405, 'Miss', 'Miss')	384	497.592	1	498.592	502.626	left	1.03698	0	45	0	1	20	0	sub-7	0.273143	FALSE	8.66575	2.62357	-6.36614	0	0	1	0.125	3	1.79382	0.00267843
637	1	1	38	38	(505.62684804090736, 'Miss', 'Miss')	300	508.127	0	509.127	512.795	right	0.669832	45	45	1	1	80	1	sub-7	0.114286	FALSE	3.15867	-0.243034	1.39012	0	0	3	0.390244	1.35755	1.78279	0.00258864
638	1	1	39	39	(515.7955497765649, 'Miss', 'Miss')	324	518.496	1	519.496	522.93	right	0.436467	45	315	0	1	20	0	sub-7	0.122857	FALSE	-0.182767	3.12876	-6.55503	0	0	2	0.0952381	3.39232	1.81674	0.00329908
639	1	1	40	40	(525.9310081373169, 'Miss', 'Miss')	324	528.631	0	529.631	533.532	left	0.904443	0	45	0	1	20	0	sub-7	0.198286	FALSE	9.4863	13.5936	-11.0808	0	0	1	0.139535	2.8413	1.83781	0.00484915
640	1	1	41	41	(536.5331460000866, 'Miss', 'Miss')	396	539.834	1	540.834	544.835	right	1.00334	45	45	1	1	80	1	sub-7	0.154857	FALSE	8.6717	9.89934	-6.69188	0	0	3	0.386364	1.37197	1.82689	0.0019909
641	1	1	42	42	(547.8354698459868, 'Miss', 'Miss')	336	550.636	1	551.636	555.52	right	0.887526	45	45	1	1	80	1	sub-7	0.323429	FALSE	-2.71426	-4.96433	-2.59882	0	0	3	0.4	1.32193	1.81541	0.00214855
642	1	1	43	43	(558.5209830251554, 'Miss', 'Miss')	348	561.421	0	562.421	566.122	left	0.704421	0	315	1	1	80	1	sub-7	0.12	FALSE	-4.92129	-6.37919	7.67123	0	0	0	0.326087	1.61667	1.81051	0.000493994
643	1	1	44	44	(569.1231455784064, 'Miss', 'Miss')	300	571.623	0	572.623	576.091	left	0.470719	0	45	0	1	20	0	sub-7	0.549143	TRUE	-7.15671	-10.4248	-4.35251	0	0	1	0.148936	2.74723	1.82829	0.00174344
644	1	1	45	45	(579.0918569128353, 'Miss', 'Miss')	324	581.792	1	582.792	586.56	right	0.771351	45	45	1	1	80	1	sub-7	0	FALSE	-0.186951	-1.27514	-0.494649	0	0	3	0.395833	1.33703	1.81781	0.00153558
645	1	1	46	46	(589.5606007055374, 'Miss', 'Miss')	408	592.961	1	593.961	597.862	right	0.903761	0	315	1	1	80	0	sub-7	0.263429	FALSE	2.31173	-0.605034	-2.43413	0	0	0	0.326531	1.61471	1.81315	0.00044391
646	1	1	47	47	(600.8629522935514, 'Miss', 'Miss')	384	604.063	0	605.063	608.231	left	0.169837	45	315	0	1	20	1	sub-7	0.414857	TRUE	-6.0781	-7.07498	7.53841	0	0	2	0.1	3.32193	1.84036	0.00238401
647	1	1	48	48	(611.2317110115107, 'Miss', 'Miss')	384	614.432	1	615.432	619.516	right	1.08733	45	45	1	1	80	1	sub-7	0.3	FALSE	-0.946277	3.20008	2.35687	0	0	3	0.392157	1.3505	1.83053	0.00219305
648	1	1	49	49	(622.5172938788692, 'Miss', 'Miss')	348	625.418	1	626.418	635.57	left	6.15476	0	315	1	1	80	1	sub-7	0	FALSE	-0.236865	1.86276	2.32717	1	1	0	0.326923	1.61298	1.8259	0.000401015
649	1	1	50	50	(638.5706691508806, 'Miss', 'Miss')	372	641.671	0	642.671	646.205	right	0.537877	45	45	1	1	80	1	sub-7	0	FALSE	6.02539	10.5746	-1.2155	0	0	3	0.396226	1.3356	1.81644	0.000382423
650	1	1	51	51	(649.2061632989589, 'Miss', 'Miss')	312	651.806	0	652.807	656.357	right	0.553855	45	45	1	1	80	1	sub-7	0.0971429	FALSE	-6.34503	4.13322	-1.06808	0	0	3	0.407407	1.29546	1.80663	0.00144482
651	1	1	52	52	(659.3582192115248, 'Miss', 'Miss')	384	662.559	0	663.559	667.093	left	0.538107	0	315	1	1	80	1	sub-7	0.229143	FALSE	-3.75076	2.0807	2.00934	0	0	0	0.327273	1.61143	1.80267	0.000336964
652	1	1	53	53	(670.0938030221148, 'Miss', 'Miss')	396	673.394	0	674.394	678.062	left	0.669877	0	315	1	1	80	1	sub-7	0	FALSE	2.07837	7.04492	-6.90851	0	0	0	0.339286	1.55943	1.79797	0.00180412
653	1	1	54	54	(681.0626508477435, 'Miss', 'Miss')	360	684.063	0	685.063	688.464	right	0.404374	45	45	1	1	80	1	sub-7	0	FALSE	-2.69908	-2.02304	2.44043	0	0	3	0.403509	1.30933	1.78923	0.000298491
654	1	1	55	55	(691.4647625219579, 'Miss', 'Miss')	372	694.565	1	695.565	698.833	left	0.270608	0	45	0	1	20	0	sub-7	0.287429	FALSE	-5.64468	-7.96863	6.89131	0	0	1	0.137931	2.85798	1.80609	0.00114422
655	1	1	56	56	(701.8335972533089, 'Miss', 'Miss')	300	704.334	0	705.334	708.701	left	0.37044	0	315	1	1	80	1	sub-7	0.129143	FALSE	2.34305	2.25145	-1.60563	0	0	0	0.338983	1.56071	1.80161	0.00121541
656	1	1	57	57	(711.7022966031445, 'Miss', 'Miss')	384	714.903	0	715.903	719.387	left	0.48794	0	45	0	1	20	0	sub-7	0.114286	FALSE	3.05227	5.12556	-4.7889	0	0	1	0.15	2.73697	1.81587	0.00105664
657	1	1	58	58	(722.3877659497734, 'Miss', 'Miss')	372	725.488	0	726.488	729.822	right	0.336747	0	315	1	1	80	0	sub-7	0.208	FALSE	6.61386	0.0790912	-3.21767	0	0	0	0.344262	1.53842	1.81104	0.00102563
658	1	1	59	59	(732.823236683508, 'Miss', 'Miss')	300	735.323	0	736.324	740.008	left	0.686795	0	315	1	1	80	1	sub-7	0.245143	FALSE	-6.3058	-2.51433	1.44688	0	0	0	0.354839	1.49476	1.80569	0.00137208
659	1	1	60	60	(743.0086497136458, 'Miss', 'Miss')	372	746.109	0	747.109	750.977	left	0.870691	0	315	1	1	80	1	sub-7	0.148	FALSE	-2.60039	-3.15077	3.25608	0	0	0	0.365079	1.45372	1.79989	0.00127039
660	1	1	61	61	(753.9775516363964, 'Miss', 'Miss')	336	756.778	1	757.778	761.379	right	0.603198	0	315	1	1	80	0	sub-7	0.154857	FALSE	0.45123	-10.4891	3.05255	0	0	0	0.375	1.41504	1.79368	0.00117912
661	1	1	62	62	(764.3796938269359, 'Miss', 'Miss')	396	767.68	1	768.68	771.964	right	0.287356	45	315	0	1	20	0	sub-7	0.161143	FALSE	2.21913	-4.57666	6.01481	0	0	2	0.0923077	3.43741	1.81703	0.00150117
662	1	1	63	63	(774.9652025118819, 'Miss', 'Miss')	360	777.965	0	778.966	782.65	left	0.688188	0	315	1	1	80	1	sub-7	0	FALSE	3.15633	1.69895	3.20195	0	0	0	0.378788	1.40054	1.81055	0.00147144
663	1	1	64	64	(785.6506715810897, 'Miss', 'Miss')	408	789.051	0	790.051	793.735	right	0.687962	45	45	1	1	80	1	sub-7	0	FALSE	-1.89881	4.46975	-2.77982	0	0	3	0.358209	1.48113	1.80542	0.000218248
664	1	1	65	65	(796.7362895699639, 'Miss', 'Miss')	336	799.537	1	800.537	803.754	left	0.220967	0	315	1	1	80	1	sub-7	0	FALSE	-0.873203	1.73095	-4.57552	0	0	0	0.382353	1.38702	1.79912	0.000208681
665	1	1	66	66	(806.7550401872261, 'Miss', 'Miss')	312	809.355	0	810.355	814.139	right	0.787616	45	315	0	1	20	0	sub-7	0.168571	FALSE	-1.65209	-3.31417	5.46636	0	0	2	0.101449	3.30117	1.81932	0.00119769
666	1	1	67	67	(817.1404305797992, 'Miss', 'Miss')	300	819.641	1	820.641	824.092	left	0.453628	45	45	1	1	80	0	sub-7	0.205714	FALSE	4.12437	0.170915	0.17913	0	0	3	0.357143	1.48543	1.81436	0.00120455
667	1	1	68	68	(827.0924730651818, 'Miss', 'Miss')	372	830.193	1	831.193	834.827	right	0.636822	45	45	1	1	80	1	sub-7	0	FALSE	1.796	-5.38219	3.11072	0	0	3	0.366197	1.44931	1.80905	0.000994758
668	1	1	69	69	(837.8279841914339, 'Miss', 'Miss')	396	841.128	0	842.128	845.413	left	0.287692	0	315	1	1	80	1	sub-7	0	FALSE	-3.16628	1.7516	0.123609	0	0	0	0.375	1.41504	1.80342	0.000185272
669	1	1	70	70	(848.4135466960806, 'Miss', 'Miss')	324	851.114	1	852.114	855.398	left	0.286676	0	315	1	1	80	1	sub-7	0	FALSE	-1.90442	1.93474	-0.0622746	0	0	0	0.383562	1.38247	1.79753	0.00087314
670	1	1	71	71	(858.3988245111561, 'Miss', 'Miss')	348	861.299	1	862.299	865.45	left	0.154658	0	315	1	1	80	1	sub-7	0	FALSE	-10.2086	-1.56945	2.82619	0	0	0	0.391892	1.35147	1.79138	0.000820138
671	1	1	72	72	(868.4508873037662, 'Miss', 'Miss')	384	871.651	1	872.651	876.185	left	0.536946	45	45	1	1	80	0	sub-7	0.130857	FALSE	-0.840544	5.41255	2.58957	0	0	3	0.36	1.47393	1.78698	0.000162375
672	1	1	73	73	(879.186460294932, 'Miss', 'Miss')	408	882.587	1	883.587	886.854	left	0.269718	0	315	1	1	80	1	sub-7	0	FALSE	-2.72851	-3.27349	3.20288	0	0	0	0.394737	1.34104	1.781	0.000156369
673	1	1	74	74	(889.8552643989892, 'Miss', 'Miss')	396	893.156	1	894.156	898.09	left	0.938108	0	315	1	1	80	1	sub-7	0.196571	FALSE	-3.70834	-13.5348	6.3732	0	0	0	0.402597	1.31259	1.77482	0.000724025
674	1	1	75	75	(901.0909164551792, 'Miss', 'Miss')	300	903.591	1	904.591	907.725	right	0.137158	45	45	1	1	80	1	sub-7	0	FALSE	4.74002	2.52723	-3.39889	0	0	3	0.358974	1.47805	1.77086	0.00014344
675	1	1	76	76	(910.7261919954015, 'Miss', 'Miss')	312	913.326	0	914.327	917.594	right	0.270326	45	45	1	1	80	1	sub-7	0.289143	FALSE	3.57355	-2.68499	2.86366	0	0	3	0.367089	1.4458	1.7666	0.000800002
676	1	1	77	77	(920.5948502869089, 'Miss', 'Miss')	336	923.395	0	924.395	927.429	left	0.0369236	0	315	1	1	80	1	sub-7	0	FALSE	-5.41408	-15.7192	3.47814	0	0	0	0.4	1.32193	1.76095	0.000131905
677	1	1	78	78	(930.4301936288571, 'Miss', 'Miss')	348	933.33	0	934.331	937.998	left	0.669979	0	45	0	1	20	0	sub-7	0.141714	FALSE	-1.7097	8.48565	-1.80904	0	0	1	0.123457	3.01792	1.77553	0.000687611
678	1	1	79	79	(940.9990800715082, 'Miss', 'Miss')	300	943.499	0	944.499	947.933	right	0.436701	45	45	1	1	80	1	sub-7	0	FALSE	-9.05509	-19.4994	7.99705	0	0	3	0.365854	1.45066	1.77144	0.00070233
679	1	1	80	80	(950.9343632685536, 'Miss', 'Miss')	384	954.135	1	955.135	958.652	left	0.520508	0	315	1	1	80	1	sub-7	0	FALSE	-0.850875	2.21967	1.49272	0	0	0	0.39759	1.33065	1.76604	0.000125221
680	1	1	81	81	(961.6532396685595, 'Miss', 'Miss')	360	964.653	0	965.654	969.154	right	0.50301	45	45	1	1	80	1	sub-7	0	FALSE	5.01457	8.59913	-8.59651	0	0	3	0.369048	1.43812	1.76201	0.000119726
681	1	1	82	82	(972.1553857984791, 'Miss', 'Miss')	396	975.456	0	976.456	981.24	right	1.78713	0	315	1	1	80	0	sub-7	0.338286	FALSE	-0.0925269	-1.89994	7.25299	0	0	0	0.4	1.32193	1.75675	0.00011574
682	1	1	83	83	(984.2411899369367, 'Miss', 'Miss')	372	987.341	0	988.342	992.142	right	0.803698	45	45	1	1	80	1	sub-7	0	FALSE	-15.1794	-17.8919	9.18624	0	0	3	0.372093	1.42626	1.75279	0.000110798
683	1	1	84	84	(995.1434067537621, 'Miss', 'Miss')	336	997.944	1	998.944	1002.33	right	0.386971	45	45	1	1	80	1	sub-7	0	FALSE	-8.2951	-2.54534	4.73448	0	0	3	0.37931	1.39855	1.74861	0.000625597
684	1	1	85	85	(1005.3287923192074, 'Miss', 'Miss')	372	1008.43	0	1009.43	1013.28	left	0.854844	0	315	1	1	80	1	sub-7	0	FALSE	4.54343	2.05319	-5.35391	0	0	0	0.397727	1.33015	1.74377	0.000102739
685	1	1	86	86	(1016.2810331607034, 'Miss', 'Miss')	372	1019.38	1	1020.38	1023.68	right	0.303914	45	45	1	1	80	1	sub-7	0	FALSE	0.0559894	-10.2025	3.29093	0	0	3	0.382022	1.38827	1.73968	9.87178e-05
686	1	1	87	87	(1026.6831689705568, 'Miss', 'Miss')	348	1029.58	1	1030.58	1034.48	right	0.90417	0	315	1	1	80	0	sub-7	0.28	FALSE	0.0562902	2.44455	-1.5078	0	0	0	0.4	1.32193	1.73495	9.5446e-05
687	1	1	88	88	(1037.4853346864088, 'Miss', 'Miss')	348	1040.39	1	1041.39	1044.62	right	0.236452	45	45	1	1	80	1	sub-7	0.153143	FALSE	-2.16996	-3.62751	7.15006	0	0	3	0.384615	1.37851	1.73094	9.18024e-05
688	1	1	89	89	(1047.6207683566793, 'Miss', 'Miss')	300	1050.12	1	1051.12	1054.29	left	0.171574	0	315	1	1	80	1	sub-7	0	FALSE	3.15099	4.1612	2.30002	0	0	0	0.402174	1.31411	1.72634	8.88297e-05
689	1	1	90	90	(1057.2893865885744, 'Miss', 'Miss')	360	1060.29	0	1061.29	1064.71	right	0.421131	45	45	1	1	80	1	sub-7	0	FALSE	0.324293	-10.1416	-1.53214	0	0	3	0.387097	1.36923	1.72241	8.55203e-05
690	1	1	91	91	(1067.708174879627, 'Miss', 'Miss')	396	1071.01	0	1072.01	1075.93	left	0.921732	0	315	1	1	80	1	sub-7	0.115429	FALSE	2.49453	-0.995926	-3.67576	0	0	0	0.404255	1.30666	1.71792	8.28132e-05
691	1	1	92	92	(1078.9271206349172, 'Miss', 'Miss')	408	1082.33	1	1083.33	1086.63	right	0.304098	45	45	1	1	80	1	sub-7	0	FALSE	-0.384985	5.26555	4.897	0	0	3	0.389474	1.3604	1.71407	7.98002e-05
692	1	1	93	93	(1089.6293043276587, 'Miss', 'Miss')	324	1092.33	0	1093.33	1098.61	right	2.28834	45	45	1	1	80	1	sub-7	0.136571	FALSE	-4.76929	-10.5483	1.54889	0	0	3	0.395833	1.33703	1.71007	0.000478903
693	1	1	94	94	(1101.6150925976274, 'Miss', 'Miss')	336	1104.42	0	1105.42	1109.6	right	1.18678	45	315	0	1	20	0	sub-7	0.0885714	FALSE	5.45935	13.3479	-12.6661	0	0	2	0.0824742	3.59991	1.72854	0.000771417
694	1	1	95	95	(1112.6006006722469, 'Miss', 'Miss')	384	1115.8	1	1116.8	1120.4	right	0.603526	45	315	0	1	20	0	sub-7	0.613714	TRUE	2.1206	8.69753	-15.1437	0	0	2	0.0918367	3.44478	1.74517	0.00307421
695	1	1	96	96	(1123.402887898557, 'Miss', 'Miss')	372	1126.5	0	1127.5	1131.25	left	0.754723	0	315	1	1	80	1	sub-7	0	FALSE	-4.09214	-1.4376	9.39462	0	0	0	0.393939	1.34395	1.74105	0.000664314
696	1	1	97	97	(1134.2550862391347, 'Miss', 'Miss')	324	1136.96	0	1137.96	1142.71	right	1.75385	45	45	1	1	80	1	sub-7	0.233714	FALSE	0.468157	-11.6289	5.90428	0	0	3	0.39	1.35845	1.73715	7.65243e-05
697	1	1	98	98	(1145.7073809003314, 'Miss', 'Miss')	312	1148.31	0	1149.31	1154.76	left	2.45394	45	315	0	1	20	1	sub-7	0.124571	FALSE	0.0634832	-3.06214	-1.3467	0	0	2	0.0990099	3.33628	1.75221	0.000583532
698	1	1	99	99	(1157.7598215405308, 'Miss', 'Miss')	300	1160.26	1	1161.26	1165.11	left	0.853771	45	45	1	1	80	0	sub-7	0.432571	TRUE	-0.56944	2.88169	-7.76002	0	0	3	0.392157	1.3505	1.74821	0.000576189
699	1	1	100	100	(1168.1119455322435, 'Miss', 'Miss')	360	1171.11	1	1172.11	1175.55	left	0.436923	0	315	1	1	80	1	sub-7	0	FALSE	7.62764	-6.00645	-3.04462	0	0	0	0.38835	1.36457	1.74441	7.37065e-05
700	1	2	101	1	(1457.5361221740495, 'Miss', 'Miss')	348	1460.44	1	1461.44	1465.19	right	0.754112	0	315	1	1	80	0	sub-7	0.109714	FALSE	-4.20423	-13.344	8.7607	0	0	0	0.394231	1.34289	1.74049	0.000410741
701	1	2	102	2	(1468.1895934892586, 'Miss', 'Miss')	300	1470.69	1	1471.69	1481.24	left	6.55502	0	315	1	1	80	1	sub-7	0	FALSE	-2.69029	-2.32218	5.21114	1	1	0	0.4	1.32193	1.73644	0.000393304
702	1	2	103	3	(1484.2428827607177, 'Miss', 'Miss')	324	1486.94	1	1487.94	1492.06	left	1.12007	45	45	1	1	80	0	sub-7	0	FALSE	-3.61445	4.25551	-1.96138	0	0	3	0.386792	1.37037	1.73292	6.71559e-05
703	1	2	104	4	(1495.0617897325328, 'Miss', 'Miss')	336	1497.86	1	1498.86	1501.98	left	0.120639	0	45	0	1	20	0	sub-7	0	FALSE	10.5202	8.78501	-6.16813	0	0	1	0.102804	3.28204	1.74674	0.000500713
704	1	2	105	5	(1504.9804925778749, 'Miss', 'Miss')	408	1508.38	0	1509.38	1512.75	left	0.370148	0	315	1	1	80	1	sub-7	0	FALSE	0.685817	1.82352	2.23594	0	0	0	0.398148	1.32862	1.74281	0.000491034
705	1	2	106	6	(1515.7493156020537, 'Miss', 'Miss')	372	1518.85	0	1519.85	1523.13	left	0.287758	45	45	1	1	80	0	sub-7	0	FALSE	2.21816	4.4926	-0.592869	0	0	3	0.385321	1.37587	1.73938	6.48549e-05
706	1	2	107	7	(1526.134768414383, 'Miss', 'Miss')	408	1529.54	0	1530.54	1534.47	right	0.936579	45	45	1	1	80	1	sub-7	0	FALSE	-4.6404	4.72018	-0.0525503	0	0	3	0.390909	1.35509	1.73583	0.000372284
707	1	2	108	8	(1537.4703966678394, 'Miss', 'Miss')	360	1540.47	1	1541.47	1544.55	right	0.0863135	0	315	1	1	80	0	sub-7	0.144571	FALSE	4.84571	-5.32957	-3.58352	0	0	0	0.396396	1.33498	1.73216	6.11174e-05
708	1	2	109	9	(1547.5557821778002, 'Miss', 'Miss')	300	1550.06	0	1551.06	1554.42	left	0.371511	0	315	1	1	80	1	sub-7	0	FALSE	-1.04961	0.935563	0.680187	0	0	0	0.401786	1.3155	1.72839	0.000343059
709	1	2	110	10	(1557.424422436934, 'Miss', 'Miss')	324	1560.12	0	1561.12	1564.34	left	0.221195	0	45	0	1	20	0	sub-7	0.122286	FALSE	3.11975	12.5726	-10.3804	0	0	1	0.106195	3.23522	1.74115	0.000428166
710	1	2	111	11	(1567.343109469271, 'Miss', 'Miss')	408	1570.74	0	1571.74	1576.18	right	1.4367	0	45	0	1	20	1	sub-7	0	FALSE	-4.66527	-5.18079	4.09648	0	0	1	0.114035	3.13245	1.75283	0.00176277
711	1	2	112	12	(1579.1788825365616, 'Miss', 'Miss')	408	1582.58	1	1583.58	1587.08	right	0.504373	45	45	1	1	80	1	sub-7	0	FALSE	1.71003	5.67124	0.394755	0	0	3	0.382609	1.38606	1.74958	0.000389876
712	1	2	113	13	(1590.081142353663, 'Miss', 'Miss')	348	1592.98	1	1593.98	1597.28	left	0.304555	0	45	0	1	20	0	sub-7	0.0931429	FALSE	11.849	12.9892	-3.25653	0	0	1	0.12069	3.05063	1.76033	0.000356114
713	1	2	114	14	(1600.2831953810492, 'Miss', 'Miss')	300	1602.78	1	1603.78	1607	right	0.221016	45	45	1	1	80	1	sub-7	0.162857	FALSE	-2.26345	-5.26363	-2.79128	0	0	3	0.384615	1.37851	1.75701	0.000351867
714	1	2	115	15	(1610.0018348634035, 'Miss', 'Miss')	408	1613.4	0	1614.4	1617.89	right	0.486388	0	45	0	1	20	1	sub-7	0	FALSE	-4.86821	-3.28051	7.552	0	0	1	0.127119	2.97575	1.76691	0.000323074
715	1	2	116	16	(1620.8873739537062, 'Miss', 'Miss')	312	1623.49	0	1624.49	1627.82	right	0.337431	45	45	1	1	80	1	sub-7	0	FALSE	1.55802	3.90295	0.0482498	0	0	3	0.386555	1.37126	1.76353	0.000319242
716	1	2	117	17	(1630.8227217898766, 'Miss', 'Miss')	312	1633.42	0	1634.42	1638.39	right	0.970465	0	315	1	1	80	0	sub-7	0.186857	FALSE	9.70436	8.01285	-13.4495	0	0	0	0.383333	1.38333	1.76031	5.80648e-05
717	1	2	118	18	(1641.3915893678904, 'Miss', 'Miss')	384	1644.59	0	1645.59	1649.11	right	0.520017	45	315	0	1	20	0	sub-7	0.350857	FALSE	-2.00929	-10.1536	1.95306	0	0	2	0.0909091	3.45943	1.77376	0.000453542
718	1	2	119	19	(1652.110416664355, 'Miss', 'Miss')	300	1654.61	0	1655.61	1658.93	left	0.321705	45	45	1	1	80	0	sub-7	0.423429	TRUE	2.43114	-4.94806	2.59836	0	0	3	0.385246	1.37615	1.77045	0.000448779
719	1	2	120	20	(1661.9290595312473, 'Miss', 'Miss')	336	1664.73	1	1665.73	1669.5	left	0.770282	0	315	1	1	80	1	sub-7	0.197714	FALSE	-7.14485	-1.34589	4.10151	0	0	0	0.382114	1.38793	1.76729	5.61103e-05
720	1	2	121	21	(1672.4978724572966, 'Miss', 'Miss')	336	1675.3	1	1676.3	1679.67	right	0.370895	45	315	0	1	20	0	sub-7	0.571429	TRUE	4.34761	1.66464	-7.70026	0	0	2	0.0967742	3.36923	1.77969	0.000403333
721	1	2	122	22	(1682.6666613031912, 'Miss', 'Miss')	312	1685.27	1	1686.27	1689.88	left	0.620579	45	45	1	1	80	0	sub-7	0.566857	TRUE	-2.82986	4.78286	-3.10525	0	0	3	0.384	1.38082	1.77645	0.000399114
722	1	2	123	23	(1692.885420354056, 'Miss', 'Miss')	348	1695.79	0	1696.79	1700.92	right	1.13813	0	315	1	1	80	0	sub-7	0.129714	FALSE	-0.288243	-6.99967	6.3734	0	0	0	0.380952	1.39232	1.77335	5.42408e-05
723	1	2	124	24	(1703.9210040536777, 'Miss', 'Miss')	348	1706.82	0	1707.82	1711.49	left	0.669802	0	315	1	1	80	1	sub-7	0.113714	FALSE	-1.61363	0.220878	1.83777	0	0	0	0.385827	1.37397	1.77016	0.000285271
724	1	2	125	25	(1714.4897911795615, 'Miss', 'Miss')	360	1717.49	1	1718.49	1722.06	left	0.570365	0	315	1	1	80	1	sub-7	0.32	FALSE	8.31385	-3.64303	-9.48896	0	0	0	0.390625	1.35614	1.76688	0.000275186
725	1	2	126	26	(1725.0585988346093, 'Miss', 'Miss')	348	1727.96	1	1728.96	1738.78	left	6.82155	0	315	1	1	80	1	sub-7	0.754857	TRUE	0.650045	1.3987	-0.717906	1	1	0	0.395349	1.3388	1.76353	0.000265598
726	1	2	127	27	(1741.7786695326122, 'Miss', 'Miss')	348	1744.68	0	1745.68	1749.53	right	0.853882	0	315	1	1	80	0	sub-7	0.981714	TRUE	-3.71182	-6.56113	7.00498	0	0	0	0.4	1.32193	1.76009	0.000256475
727	1	2	128	28	(1752.5308289787463, 'Miss', 'Miss')	300	1755.03	1	1756.03	1760.48	left	1.45414	45	45	1	1	80	0	sub-7	0.307429	FALSE	7.70021	5.81225	-15.5201	0	0	3	0.374046	1.41871	1.75744	4.79082e-05
728	1	2	129	29	(1763.4830975623559, 'Miss', 'Miss')	324	1766.18	1	1767.18	1770.4	left	0.220289	0	315	1	1	80	1	sub-7	0.469714	TRUE	-3.15233	-0.951443	9.85439	0	0	0	0.401515	1.31647	1.75406	4.68657e-05
729	1	2	130	30	(1773.4016822262934, 'Miss', 'Miss')	408	1776.8	1	1777.8	1781.95	right	1.15478	0	315	1	1	80	0	sub-7	0.62	TRUE	-2.16455	0.516871	-2.01013	0	0	0	0.406015	1.30039	1.75062	0.000238953
730	1	2	131	31	(1784.9540793113742, 'Miss', 'Miss')	324	1787.65	1	1788.65	1792.47	right	0.820918	45	315	0	1	20	0	sub-7	0.592571	TRUE	-0.284874	2.97637	-3.09413	0	0	2	0.0970149	3.36565	1.76222	0.000339316
731	1	2	132	32	(1795.472920645348, 'Miss', 'Miss')	324	1798.17	1	1799.17	1802.84	left	0.67053	0	45	0	1	20	0	sub-7	0.413714	TRUE	10.1967	10.1358	-7.51021	0	0	1	0.118519	3.07682	1.7716	0.000565181
732	1	2	133	33	(1805.8416593889856, 'Miss', 'Miss')	312	1808.44	0	1809.44	1813.54	left	1.10406	0	315	1	1	80	1	sub-7	0.713143	TRUE	-0.647651	2.61581	5.16925	0	0	0	0.404412	1.3061	1.76815	0.000262346
733	1	2	134	34	(1816.5438730432102, 'Miss', 'Miss')	324	1819.24	1	1820.24	1825.9	right	2.65418	0	315	1	1	80	0	sub-7	0.355429	FALSE	-4.92209	-7.29069	-0.597048	0	0	0	0.408759	1.29068	1.76463	0.000222639
734	1	2	135	35	(1828.8963723857219, 'Miss', 'Miss')	348	1831.8	1	1832.8	1837.41	right	1.62092	0	315	1	1	80	0	sub-7	0.133143	FALSE	3.51264	1.95116	0.18942	0	0	0	0.413043	1.27563	1.76106	0.000215559
735	1	2	136	36	(1840.4153923789086, 'Miss', 'Miss')	300	1842.92	1	1843.92	1846.97	right	0.0534904	45	45	1	1	80	1	sub-7	0.0977143	FALSE	-0.0714352	-0.85861	4.27966	0	0	3	0.359712	1.47508	1.75895	4.36088e-05
736	1	2	137	37	(1849.9673242287413, 'Miss', 'Miss')	396	1853.27	1	1854.27	1857.35	left	0.0877283	0	315	1	1	80	1	sub-7	0.378286	FALSE	0.479602	-0.766408	3.11313	0	0	0	0.414286	1.2713	1.75544	4.28264e-05
737	1	2	138	38	(1860.3527806475454, 'Miss', 'Miss')	360	1863.35	0	1864.35	1867.59	left	0.236704	0	315	1	1	80	1	sub-7	0	FALSE	1.10184	1.3692	0.554305	0	0	0	0.41844	1.25691	1.75188	0.000201926
738	1	2	139	39	(1870.5882185346172, 'Miss', 'Miss')	312	1873.19	0	1874.19	1877.87	left	0.686705	0	315	1	1	80	1	sub-7	0.558286	TRUE	0.0878859	1.13828	-5.18918	0	0	0	0.422535	1.24286	1.74827	0.000195761
739	1	2	140	40	(1880.8736846076768, 'Miss', 'Miss')	324	1883.57	0	1884.57	1887.91	left	0.337687	0	315	1	1	80	1	sub-7	0.393143	FALSE	-3.31607	2.67923	-11.5843	0	0	0	0.426573	1.22913	1.74462	0.000189856
740	1	2	141	41	(1890.9090150217999, 'Miss', 'Miss')	300	1893.41	1	1894.41	1897.74	right	0.337753	45	45	1	1	80	1	sub-7	0.643429	TRUE	0.374043	-4.52236	9.85273	0	0	3	0.354167	1.4975	1.74285	3.95149e-05
741	1	2	142	42	(1900.744366686382, 'Miss', 'Miss')	384	1903.94	0	1904.94	1908.05	right	0.103708	45	315	0	1	20	0	sub-7	0.389143	FALSE	7.61107	13.4128	-2.21077	0	0	2	0.0965517	3.37255	1.75371	0.000304433
742	1	2	143	43	(1911.046443904891, 'Miss', 'Miss')	372	1914.15	0	1915.15	1918.7	left	0.553965	0	315	1	1	80	1	sub-7	0	FALSE	-3.02986	-4.09597	5.59821	0	0	0	0.424658	1.23563	1.75014	0.000286424
743	1	2	144	44	(1921.6986218827574, 'Miss', 'Miss')	408	1925.1	0	1926.1	1930.28	left	1.18708	45	45	1	1	80	0	sub-7	0.328	FALSE	4.64797	6.16373	-8.11845	0	0	3	0.353741	1.49923	1.74838	3.84004e-05
744	1	2	145	45	(1933.2842792654333, 'Miss', 'Miss')	408	1936.68	1	1937.68	1941.4	right	0.720697	45	45	1	1	80	1	sub-7	0	FALSE	-3.51086	0.011	6.67138	0	0	3	0.358108	1.48153	1.74653	0.000236578
745	1	2	146	46	(1944.4032133135515, 'Miss', 'Miss')	336	1947.2	1	1948.2	1951.55	right	0.353329	45	45	1	1	80	1	sub-7	0.192571	FALSE	0.796942	-11.9557	6.10314	0	0	3	0.362416	1.46428	1.74459	0.00022907
746	1	2	147	47	(1954.555279213278, 'Miss', 'Miss')	372	1957.66	1	1958.66	1961.97	left	0.320496	0	315	1	1	80	1	sub-7	0.119429	FALSE	0.814307	-2.569	-5.36983	0	0	0	0.42	1.25154	1.74129	3.56786e-05
747	1	2	148	48	(1964.9740450332183, 'Miss', 'Miss')	336	1967.77	0	1968.77	1972.58	left	0.803214	0	315	1	1	80	1	sub-7	0	FALSE	-7.61748	-0.204125	4.77137	0	0	0	0.423841	1.2384	1.73793	0.000172182
748	1	2	149	49	(1975.576225064001, 'Miss', 'Miss')	408	1978.98	0	1979.98	1983.29	left	0.320178	0	45	0	1	20	0	sub-7	0	FALSE	2.35408	8.87267	-7.96028	0	0	1	0.111842	3.16046	1.74699	0.000220993
749	1	2	150	50	(1986.295051250781, 'Miss', 'Miss')	348	1989.2	1	1990.2	1993.66	right	0.46985	45	45	1	1	80	1	sub-7	0.109714	FALSE	5.30299	8.03212	-6.31454	0	0	3	0.359477	1.47603	1.74518	0.00023221
750	1	2	151	51	(1996.6638468657516, 'Miss', 'Miss')	396	1999.96	0	2000.96	2004.28	right	0.320405	0	315	1	1	80	0	sub-7	0.36	FALSE	4.9758	1.94957	5.34954	0	0	0	0.422078	1.24442	1.74191	3.4198e-05
751	1	2	152	52	(2007.282662455044, 'Miss', 'Miss')	336	2010.08	0	2011.08	2014.43	left	0.353982	0	45	0	1	20	0	sub-7	0	FALSE	0.0975832	-0.386157	5.56345	0	0	1	0.116129	3.1062	1.75043	0.00020345
752	1	2	153	53	(2017.4347649743609, 'Miss', 'Miss')	324	2020.13	0	2021.14	2024.85	left	0.720355	45	45	1	1	80	0	sub-7	0.277143	FALSE	4.12247	1.61327	-1.02281	0	0	3	0.358974	1.47805	1.74864	0.000214153
753	1	2	154	54	(2027.8535024973453, 'Miss', 'Miss')	396	2031.15	1	2032.15	2035.52	right	0.370739	45	45	1	1	80	1	sub-7	0.103429	FALSE	-7.0498	-7.67773	-1.03515	0	0	3	0.363057	1.46173	1.74678	0.000205725
754	1	2	155	55	(2038.5223692985796, 'Miss', 'Miss')	360	2041.52	1	2042.52	2046.32	left	0.803333	0	315	1	1	80	1	sub-7	0	FALSE	-12.1592	-9.71843	10.0053	0	0	0	0.417722	1.25939	1.74367	3.24267e-05
755	1	2	156	56	(2049.324588834132, 'Miss', 'Miss')	372	2052.42	0	2053.43	2056.69	right	0.270594	0	315	1	1	80	0	sub-7	0	FALSE	-9.04919	-4.31767	5.05205	0	0	0	0.421384	1.24679	1.74053	0.00015686
756	1	2	157	57	(2059.693366971571, 'Miss', 'Miss')	300	2062.19	0	2063.19	2066.66	right	0.470365	0	315	1	1	80	0	sub-7	0.120571	FALSE	-2.41406	0.166553	-0.273026	0	0	0	0.425	1.23447	1.73735	0.00015262
757	1	2	158	58	(2069.6620516735707, 'Miss', 'Miss')	396	2072.96	1	2073.96	2078.45	left	1.48772	45	45	1	1	80	0	sub-7	0.121143	FALSE	-2.61605	-4.87795	-1.57773	0	0	3	0.360248	1.47294	1.73566	3.06394e-05
758	1	2	159	59	(2081.447781574132, 'Miss', 'Miss')	336	2084.25	0	2085.25	2089.17	right	0.920511	45	315	0	1	20	0	sub-7	0	FALSE	-7.08409	-14.6514	6.24404	0	0	2	0.0925926	3.43296	1.74582	0.000255053
759	1	2	160	60	(2092.166594167276, 'Miss', 'Miss')	324	2094.87	1	2095.87	2099.98	left	1.11996	0	315	1	1	80	1	sub-7	0	FALSE	-8.83557	-11.7525	4.67846	0	0	0	0.423313	1.2402	1.7427	0.000242204
760	1	2	161	61	(2102.9854548097614, 'Miss', 'Miss')	384	2106.19	1	2107.19	2111.3	right	1.12037	45	315	0	1	20	0	sub-7	0.136571	FALSE	1.54683	5.8646	-2.20413	0	0	2	0.097561	3.35755	1.75224	0.000223925
761	1	2	162	62	(2114.30445776929, 'Miss', 'Miss')	312	2116.9	0	2117.9	2121.64	left	0.736858	45	45	1	1	80	0	sub-7	0.256	FALSE	-6.15633	-1.83284	6.21897	0	0	3	0.357576	1.48368	1.75058	0.000233785
762	1	2	163	63	(2124.6398846150005, 'Miss', 'Miss')	348	2127.54	0	2128.54	2131.87	right	0.337832	45	45	1	1	80	1	sub-7	0	FALSE	-5.29006	-4.67813	11.0666	0	0	3	0.361446	1.46815	1.74884	0.000185297
763	1	2	164	64	(2134.8752867147455, 'Miss', 'Miss')	336	2137.68	0	2138.68	2142.79	left	1.12175	0	315	1	1	80	1	sub-7	0	FALSE	0.461002	-0.339484	-1.35005	0	0	0	0.419162	1.25442	1.74586	2.91666e-05
764	1	2	165	65	(2145.794134928764, 'Miss', 'Miss')	336	2148.59	1	2149.59	2153.56	left	0.970173	0	315	1	1	80	1	sub-7	0.113714	FALSE	-1.61993	3.80218	-5.31427	0	0	0	0.422619	1.24257	1.74285	0.000139784
765	1	2	166	66	(2156.563049779339, 'Miss', 'Miss')	396	2159.86	1	2160.86	2165.1	left	1.23749	45	45	1	1	80	0	sub-7	0.26	FALSE	-4.48113	-8.39756	3.35111	0	0	3	0.360947	1.47014	1.7412	2.80385e-05
766	1	2	167	67	(2168.0986917374, 'Miss', 'Miss')	396	2171.4	1	2172.4	2176.05	right	0.654249	45	315	0	1	20	0	sub-7	0.246286	FALSE	-2.15656	0.329023	2.87822	0	0	2	0.1	3.32193	1.75023	0.000212741
767	1	2	168	68	(2179.0509467273737, 'Miss', 'Miss')	396	2182.35	1	2183.35	2187.85	left	1.50428	0	45	0	1	20	0	sub-7	0.125714	FALSE	0.238537	3.94216	-2.12017	0	0	1	0.111111	3.16993	1.75829	0.000360661
768	1	2	169	69	(2190.853306360601, 'Miss', 'Miss')	324	2193.55	1	2194.55	2198.24	left	0.687388	0	315	1	1	80	1	sub-7	0	FALSE	-4.79608	-4.35903	3.35468	0	0	0	0.418605	1.25634	1.75535	0.000176191
769	1	2	170	70	(2201.238799676416, 'Miss', 'Miss')	408	2204.64	1	2205.64	2208.94	right	0.304204	0	315	1	1	80	0	sub-7	0.269714	FALSE	-1.78489	-6.52877	3.0091	0	0	0	0.421965	1.2448	1.75239	0.000132172
770	1	2	171	71	(2211.940980040104, 'Miss', 'Miss')	312	2214.54	0	2215.54	2219.26	right	0.720525	0	315	1	1	80	0	sub-7	0.148571	FALSE	-1.22216	-4.54894	4.74205	0	0	0	0.425287	1.23349	1.74939	0.000128886
771	1	2	172	72	(2222.259703359126, 'Miss', 'Miss')	384	2225.46	1	2226.46	2231.19	left	1.73693	0	315	1	1	80	1	sub-7	0.130857	FALSE	-2.503	-2.81564	-1.21788	0	0	0	0.428571	1.22239	1.74636	0.000125714
772	1	2	173	73	(2234.1954878561673, 'Miss', 'Miss')	300	2236.7	1	2237.7	2245.38	right	4.68752	45	45	1	1	80	1	sub-7	0.118857	FALSE	7.41951	1.79409	-4.17105	0	0	3	0.352273	1.50524	1.74496	2.66814e-05
773	1	2	174	74	(2248.381647149165, 'Miss', 'Miss')	360	2251.38	0	2252.38	2256.62	right	1.23739	45	315	0	1	20	0	sub-7	0.155429	FALSE	3.2802	9.96476	-4.72832	0	0	2	0.101695	3.29768	1.75348	0.000194341
774	1	2	175	75	(2259.6172639728707, 'Miss', 'Miss')	348	2262.52	0	2263.52	2266.62	left	0.103275	45	45	1	1	80	0	sub-7	0.124	FALSE	2.50019	4.89524	-0.42496	0	0	3	0.353933	1.49845	1.75202	0.000192748
775	1	2	176	76	(2269.619335199083, 'Miss', 'Miss')	300	2272.12	0	2273.12	2277.19	left	1.0706	0	315	1	1	80	1	sub-7	0	FALSE	6.09026	4.78008	-3.57226	0	0	0	0.424581	1.23589	1.74912	2.60568e-05
776	1	2	177	77	(2280.1881004086968, 'Miss', 'Miss')	360	2283.19	0	2284.19	2287.72	right	0.537167	45	45	1	1	80	1	sub-7	0	FALSE	-3.45459	-1.57084	1.90599	0	0	3	0.355556	1.49185	1.74766	2.54313e-05
777	1	2	178	78	(2290.7235711979156, 'Miss', 'Miss')	384	2293.92	0	2294.92	2298.32	left	0.404084	45	45	1	1	80	0	sub-7	0.130857	FALSE	3.99419	-0.954373	-1.78008	0	0	3	0.359116	1.47748	1.74614	0.000157422
778	1	2	179	79	(2301.3257454028544, 'Miss', 'Miss')	396	2304.63	1	2305.63	2309.48	right	0.853197	45	315	0	1	20	0	sub-7	0.273714	FALSE	-0.0888132	6.71737	-10.5008	0	0	2	0.104396	3.25987	1.75423	0.000177458
779	1	2	180	80	(2312.478000503797, 'Miss', 'Miss')	396	2315.78	1	2316.78	2320.85	right	1.0702	45	45	1	1	80	1	sub-7	0.394857	FALSE	-1.67207	-14.1743	8.75154	0	0	3	0.360656	1.47131	1.75265	0.000176061
780	1	2	181	81	(2323.846968674715, 'Miss', 'Miss')	348	2326.75	1	2327.75	2331.83	left	1.08661	0	315	1	1	80	1	sub-7	0	FALSE	-6.46782	0.57009	2.18875	0	0	0	0.418478	1.25678	1.74994	2.4284e-05
781	1	2	182	82	(2334.8325666337832, 'Miss', 'Miss')	336	2337.63	1	2338.63	2342.3	left	0.671451	45	45	1	1	80	0	sub-7	0.134286	FALSE	-0.104958	-2.32742	4.28276	0	0	3	0.362162	1.46529	1.74837	2.37425e-05
782	1	2	183	83	(2345.3012491164136, 'Miss', 'Miss')	348	2348.2	1	2349.2	2352.69	right	0.487069	45	45	1	1	80	1	sub-7	0	FALSE	1.70996	-0.965012	3.27553	0	0	3	0.365591	1.4517	1.74675	0.000144933
783	1	2	184	84	(2355.6867596323395, 'Miss', 'Miss')	300	2358.19	0	2359.19	2362.62	left	0.437098	0	315	1	1	80	1	sub-7	0	FALSE	5.05958	10.6754	-4.07585	0	0	0	0.417112	1.26149	1.74414	2.29131e-05
784	1	2	185	85	(2365.622101642666, 'Miss', 'Miss')	360	2368.62	0	2369.62	2374.06	right	1.43699	45	45	1	1	80	1	sub-7	0.132571	FALSE	4.92189	5.81612	-6.24723	0	0	3	0.367021	1.44606	1.74253	2.24221e-05
785	1	2	186	86	(2377.0577804422537, 'Miss', 'Miss')	348	2379.96	0	2380.96	2384.81	right	0.853709	45	45	1	1	80	1	sub-7	0	FALSE	-3.60201	2.19729	-0.304839	0	0	3	0.37037	1.43296	1.74087	0.000137502
786	1	2	187	87	(2387.8099409980723, 'Miss', 'Miss')	324	2390.51	0	2391.51	2395.26	right	0.754839	45	45	1	1	80	1	sub-7	0.126286	FALSE	0.0420199	1.20878	-2.20795	0	0	3	0.373684	1.42011	1.73915	0.000134135
787	1	2	188	88	(2398.2621097100728, 'Miss', 'Miss')	348	2401.16	0	2402.16	2406.13	right	0.970002	45	45	1	1	80	1	sub-7	0	FALSE	12.5375	20.8222	-24.1618	0	0	3	0.376963	1.4075	1.73739	0.000130884
788	1	2	189	89	(2409.1309741254854, 'Miss', 'Miss')	336	2411.93	1	2412.93	2417	right	1.07156	45	45	1	1	80	1	sub-7	0	FALSE	-0.0237544	0.815342	5.59262	0	0	3	0.380208	1.39514	1.73559	0.000127744
789	1	2	190	90	(2419.9998149601015, 'Miss', 'Miss')	324	2422.7	0	2423.7	2427.38	left	0.688065	45	45	1	1	80	0	sub-7	0.144571	FALSE	7.01177	-1.38086	5.01114	0	0	3	0.38342	1.383	1.73374	0.000124709
790	1	2	191	91	(2430.3852122882026, 'Miss', 'Miss')	396	2433.69	0	2434.69	2438.42	left	0.737899	45	45	1	1	80	0	sub-7	0.141714	FALSE	2.88463	-1.0204	1.86321	0	0	3	0.386598	1.37109	1.73185	0.000121776
791	1	2	192	92	(2441.420823729938, 'Miss', 'Miss')	312	2444.02	0	2445.02	2448.24	right	0.220857	45	315	0	1	20	0	sub-7	0	FALSE	-3.50627	5.64861	-2.40173	0	0	2	0.102564	3.2854	1.73962	0.000154255
792	1	2	193	93	(2451.239481577572, 'Miss', 'Miss')	360	2454.24	1	2455.24	2459.24	right	1.00347	45	45	1	1	80	1	sub-7	0	FALSE	11.9484	12.7849	-8.11149	0	0	3	0.387755	1.36678	1.73769	0.00015322
793	1	2	194	94	(2462.2417811213804, 'Miss', 'Miss')	372	2465.34	1	2466.34	2469.54	right	0.204575	45	45	1	1	80	1	sub-7	0.122857	FALSE	4.48424	3.03185	-1.92487	0	0	3	0.390863	1.35527	1.73573	0.000115987
794	1	2	195	95	(2472.5438422494635, 'Miss', 'Miss')	324	2475.24	1	2476.24	2479.88	left	0.636926	0	315	1	1	80	1	sub-7	0.128571	FALSE	-0.509545	-3.09485	0.811122	0	0	0	0.39899	1.32558	1.73365	1.92121e-05
795	1	2	196	96	(2482.8792496756946, 'Miss', 'Miss')	408	2486.28	0	2487.28	2490.76	left	0.487726	45	45	1	1	80	0	sub-7	0.135429	FALSE	-4.44837	-1.65906	2.65216	0	0	3	0.39196	1.35122	1.73171	1.88881e-05
796	1	2	197	97	(2493.7647984757373, 'Miss', 'Miss')	372	2496.87	0	2497.87	2501.9	right	1.03755	45	45	1	1	80	1	sub-7	0.237143	FALSE	-0.192096	-3.68037	-0.764628	0	0	3	0.395	1.34008	1.72973	0.000110591
797	1	2	198	98	(2504.9003861147394, 'Miss', 'Miss')	312	2507.5	1	2508.5	2512.03	left	0.53647	0	45	0	1	20	0	sub-7	0	FALSE	-2.50816	-0.601698	3.9339	0	0	1	0.0995025	3.32912	1.73749	0.000149477
798	1	2	199	99	(2515.0358000881088, 'Miss', 'Miss')	360	2518.04	0	2519.04	2522.32	right	0.286314	45	45	1	1	80	1	sub-7	0.490857	TRUE	-6.12125	-10.6116	-6.08437	0	0	3	0.39604	1.33628	1.73549	0.000148535
799	1	2	200	100	(2525.3212245479976, 'Miss', 'Miss')	408	2528.72	0	2529.72	2533.97	left	1.25519	0	315	1	1	80	1	sub-7	0.176	FALSE	-2.72224	-7.69255	1.75015	0	0	0	0.394089	1.34341	1.73354	1.82442e-05
800	1	1	1	1	(130.54176405328826, 'Miss', 'Miss')	360	133.551	0	134.551	141.169	left	3.62188	0	45	1	1	80	0	sub-9	0.270286	FALSE	-1.13358	5.85543	0.290243	0	0	1	0.25	2	1.92193	0.0780719
801	1	1	2	2	(144.17044159174657, 'Miss', 'Miss')	300	146.671	1	147.671	151.555	left	0.88696	0	315	0	1	20	1	sub-9	0.235429	FALSE	-1.36928	-2.01883	1.63019	0	0	0	0.2	2.32193	1.9183	0.0817042
802	1	1	3	3	(154.55590368912783, 'Miss', 'Miss')	372	157.656	1	158.656	162.857	right	1.20366	45	45	0	1	20	1	sub-9	0.389143	FALSE	-2.25371	-7.06507	2.71393	0	0	3	0.166667	2.58496	1.95021	0.0860017
803	1	1	4	4	(165.85825825142695, 'Miss', 'Miss')	324	168.559	0	169.559	173.693	right	1.13679	45	45	0	1	20	1	sub-9	0.402286	TRUE	-3.64716	-2.30782	3.3407	0	0	3	0.285714	1.80735	1.90564	0.179323
804	1	1	5	5	(176.6938000937131, 'Miss', 'Miss')	336	179.494	1	180.494	184.762	right	1.27157	0	45	1	1	80	1	sub-9	0.153714	FALSE	-2.96428	-2.04347	0.7249	0	0	1	0.25	2	1.89106	0.0274049
805	1	1	6	6	(187.76278047693802, 'Miss', 'Miss')	396	191.063	0	192.063	195.631	right	0.570749	45	315	1	1	80	0	sub-9	0.284571	FALSE	3.90217	-1.03577	0.051523	0	0	2	0.111111	3.16993	1.97095	0.0535607
806	1	1	7	7	(198.63169699765774, 'Miss', 'Miss')	396	201.932	0	202.932	206.483	left	0.5543	0	45	1	1	80	0	sub-9	0.256571	FALSE	-0.969412	-1.53609	0.892722	0	0	1	0.3	1.73697	1.93626	0.0432343
807	1	1	8	8	(209.4839776409102, 'Miss', 'Miss')	360	212.484	0	213.484	217.952	left	1.47147	45	315	1	1	80	1	sub-9	0.242286	FALSE	-5.0329	-2.5591	2.89158	0	0	2	0.181818	2.45943	1.95915	0.0215521
808	1	1	9	9	(220.95300307744048, 'Miss', 'Miss')	360	223.953	0	224.954	229.621	right	1.6707	0	45	1	1	80	1	sub-9	0.336571	FALSE	-1.36278	-6.29263	7.5962	0	0	1	0.333333	1.58496	1.92202	0.0178017
809	1	1	10	10	(232.62212011865893, 'Miss', 'Miss')	324	235.322	0	236.323	240.373	right	1.05405	0	45	1	1	80	1	sub-9	0.265714	FALSE	0.583654	5.88596	-0.728752	0	0	1	0.384615	1.37851	1.87739	0.0283058
810	1	1	11	11	(243.37436078542567, 'Miss', 'Miss')	408	246.775	1	247.775	252.409	left	1.63798	0	45	1	1	80	0	sub-9	0.329714	FALSE	-5.49935	-0.890856	3.44707	0	0	1	0.428571	1.22239	1.82947	0.0200816
811	1	1	12	12	(255.41019342127413, 'Miss', 'Miss')	324	258.11	0	259.111	263.311	left	1.20476	45	315	1	1	80	1	sub-9	0.224571	FALSE	-7.34146	-7.26491	2.16401	0	0	2	0.2	2.32193	1.8496	0.00841098
812	1	1	13	13	(266.3124729687105, 'Miss', 'Miss')	324	269.013	1	270.013	274.514	right	1.50391	0	45	1	1	80	1	sub-9	0.350857	FALSE	-1.11493	-19.2036	6.3414	0	0	1	0.4375	1.19265	1.80776	0.00774014
813	1	1	14	14	(277.5147645285118, 'Miss', 'Miss')	312	280.115	1	281.115	284.916	right	0.804023	0	45	1	1	80	1	sub-9	0.182857	FALSE	4.07647	-6.1151	-0.637159	0	0	1	0.470588	1.08746	1.76525	0.01136
814	1	1	15	15	(287.9169229813193, 'Miss', 'Miss')	372	291.017	0	292.017	295.652	right	0.638077	0	315	0	1	20	0	sub-9	0.326286	FALSE	-5.00362	-0.964547	1.90795	0	0	0	0.111111	3.16993	1.82482	0.0123886
815	1	1	16	16	(298.6525030800759, 'Miss', 'Miss')	372	301.753	0	302.753	307.421	left	1.6699	45	315	1	1	80	1	sub-9	0.416571	TRUE	-6.81752	-6.60978	14.8709	0	0	2	0.210526	2.24793	1.83949	0.0162233
816	1	1	17	17	(310.42163679434645, 'Miss', 'Miss')	336	313.222	0	314.222	318.64	right	1.42009	0	45	1	1	80	1	sub-9	0.696	TRUE	-1.06932	-2.52527	0.69311	0	0	1	0.45	1.152	1.80476	0.00464206
817	1	1	18	18	(321.64062526441774, 'Miss', 'Miss')	384	324.841	0	325.841	330.709	right	1.87141	0	45	1	1	80	1	sub-9	0.481143	TRUE	-3.72216	-4.99969	1.8241	0	0	1	0.47619	1.07039	1.76974	0.00724978
818	1	1	19	19	(333.70979651386176, 'Miss', 'Miss')	360	336.71	1	337.71	343.178	left	2.47062	0	45	1	1	80	0	sub-9	0.251429	FALSE	3.87532	0.978117	-7.03697	0	0	1	0.5	1	1.73491	0.00599081
819	1	1	20	20	(346.1790433330124, 'Miss', 'Miss')	408	349.579	0	350.58	354.264	right	0.687639	0	315	0	1	20	0	sub-9	0.352	FALSE	3.47888	11.2999	-8.15357	0	0	0	0.130435	2.9386	1.77729	0.00640748
820	1	1	21	21	(357.26468705846594, 'Miss', 'Miss')	300	359.765	1	360.765	366.116	right	2.35349	45	315	1	1	80	0	sub-9	0.113714	FALSE	8.35677	3.74462	-2.04825	0	0	2	0.208333	2.26303	1.79249	0.00924002
821	1	1	22	22	(369.1171766003564, 'Miss', 'Miss')	372	372.218	1	373.218	377.435	left	1.22123	45	315	1	1	80	1	sub-9	0.244571	FALSE	-7.91623	-8.82115	4.52042	0	0	2	0.24	2.05889	1.79944	0.0152146
822	1	1	23	23	(380.43617674988684, 'Miss', 'Miss')	384	383.637	0	384.637	389.088	left	1.45349	45	315	1	1	80	1	sub-9	0.176571	FALSE	5.04608	5.14725	-0.837413	0	0	2	0.269231	1.89308	1.80028	0.0119428
823	1	1	24	24	(392.08859743567916, 'Miss', 'Miss')	360	395.089	0	396.089	399.54	left	0.454528	45	315	1	1	80	1	sub-9	0.202286	FALSE	-1.56192	6.29466	-5.92306	0	0	2	0.296296	1.75489	1.79651	0.00962518
824	1	1	25	25	(402.54077781868216, 'Miss', 'Miss')	336	405.341	1	406.341	409.892	left	0.554816	45	315	1	1	80	1	sub-9	0.436	TRUE	1.52102	3.51628	-0.349446	0	0	2	0.321429	1.63743	1.78923	0.00791619
825	1	1	26	26	(412.8929104573882, 'Miss', 'Miss')	396	416.193	1	417.193	420.678	left	0.487963	45	315	1	1	80	1	sub-9	0.245714	FALSE	-3.79153	-3.67831	-0.317189	0	0	2	0.344828	1.53605	1.77928	0.00661675
826	1	1	27	27	(423.6784650472074, 'Miss', 'Miss')	300	426.179	0	427.179	430.463	left	0.287	45	315	1	1	80	1	sub-9	0.235429	FALSE	-4.37632	9.0835	-2.35847	0	0	2	0.366667	1.44746	1.76729	0.00560445
827	1	1	28	28	(433.46387260345693, 'Miss', 'Miss')	336	436.264	1	437.264	440.682	left	0.419969	45	315	1	1	80	1	sub-9	0.427429	TRUE	-3.33229	-0.44969	-5.8985	0	0	2	0.387097	1.36923	1.75375	0.00480014
828	1	1	29	29	(443.6826599427012, 'Miss', 'Miss')	408	447.083	1	448.083	451.284	left	0.204561	45	45	0	1	20	0	sub-9	0.0971429	FALSE	2.92024	-0.561595	-1.92271	0	0	3	0.09375	3.41504	1.79817	0.00560079
829	1	1	30	30	(454.28483981247393, 'Miss', 'Miss')	408	457.685	0	458.685	462.653	right	0.970729	0	315	0	1	20	0	sub-9	0.308571	FALSE	3.03315	6.49167	0.661533	0	0	0	0.121212	3.04439	1.83055	0.00870747
830	1	1	31	31	(465.6538324854861, 'Miss', 'Miss')	408	469.054	1	470.054	474.372	left	1.32091	45	315	1	1	80	1	sub-9	0.452	TRUE	-2.67904	2.5104	2.76478	0	0	2	0.382353	1.38702	1.81694	0.00386691
831	1	1	32	32	(477.3729603600269, 'Miss', 'Miss')	336	480.173	0	481.173	485.458	left	1.28831	0	45	1	1	80	0	sub-9	0.172571	FALSE	4.25052	4.90992	-1.4006	0	0	1	0.342857	1.54432	1.8083	0.000816081
832	1	1	33	33	(488.45861379524433, 'Miss', 'Miss')	300	490.959	0	491.959	495.943	left	0.98716	45	315	1	1	80	1	sub-9	0.288571	FALSE	0.780005	2.35085	-1.43282	0	0	2	0.388889	1.36257	1.79543	0.000755028
833	1	1	34	34	(498.94413806285763, 'Miss', 'Miss')	324	501.644	1	502.645	507.212	right	1.57109	0	45	1	1	80	1	sub-9	0.404	TRUE	3.43485	4.86486	-7.22245	0	0	1	0.351351	1.50901	1.78698	0.000677697
834	1	1	35	35	(510.2131257145346, 'Miss', 'Miss')	396	513.513	1	514.514	518.264	right	0.753321	0	45	1	1	80	1	sub-9	0.296571	FALSE	-4.14981	-10.4401	4.55607	0	0	1	0.368421	1.44057	1.77729	0.00345533
835	1	1	36	36	(521.2653559224983, 'Miss', 'Miss')	360	524.266	1	525.266	528.767	right	0.504398	0	45	1	1	80	1	sub-9	0.237143	FALSE	-2.63012	-3.09456	0.428146	0	0	1	0.384615	1.37851	1.7666	0.00305745
836	1	1	37	37	(531.7675249450775, 'Miss', 'Miss')	300	534.268	1	535.268	538.985	right	0.719751	0	45	1	1	80	1	sub-9	0.234857	FALSE	-2.06333	0.301579	-3.50822	0	0	1	0.4	1.32193	1.75512	0.00272163
837	1	1	38	38	(541.986313671431, 'Miss', 'Miss')	324	544.687	0	545.687	549.754	left	1.0703	45	45	0	1	20	0	sub-9	0.119429	FALSE	-3.38118	0.316655	3.60685	0	0	3	0.097561	3.35755	1.78971	0.00333707
838	1	1	39	39	(552.7551907705086, 'Miss', 'Miss')	324	555.455	0	556.456	559.906	right	0.454853	45	315	1	1	80	0	sub-9	0.242857	FALSE	-3.82861	-3.13194	4.48204	0	0	2	0.357143	1.48543	1.78194	0.00336611
839	1	1	40	40	(562.9072942244383, 'Miss', 'Miss')	324	565.608	0	566.608	571.025	right	1.42118	0	45	1	1	80	1	sub-9	0.578286	TRUE	1.92842	2.84391	-2.99002	0	0	1	0.395349	1.3388	1.7713	0.000478289
840	1	1	41	41	(574.0262724021596, 'Miss', 'Miss')	348	576.927	1	577.927	582.261	left	1.33753	0	315	0	1	20	1	sub-9	0.798286	TRUE	-3.4386	0.103284	1.50505	0	0	0	0.113636	3.1375	1.79901	0.00246778
841	1	1	42	42	(585.2619239370375, 'Miss', 'Miss')	384	588.462	0	589.462	592.88	right	0.420169	0	45	1	1	80	1	sub-9	0.365143	FALSE	-0.889358	0.760707	-5.87851	0	0	1	0.4	1.32193	1.78813	0.00239693
842	1	1	43	43	(595.8807599360708, 'Miss', 'Miss')	324	598.581	0	599.581	603.899	right	1.32086	45	315	1	1	80	0	sub-9	0.247429	FALSE	0.886647	1.41462	0.74306	0	0	2	0.347826	1.52356	1.78189	0.000432671
843	1	1	44	44	(606.8997175568348, 'Miss', 'Miss')	360	609.9	0	610.9	614.451	left	0.554128	45	315	1	1	80	1	sub-9	0.0765714	FALSE	-4.35794	4.61208	1.04001	0	0	2	0.361702	1.46713	1.77478	0.00232133
844	1	1	45	45	(617.4518721673497, 'Miss', 'Miss')	384	620.652	0	621.652	625.053	left	0.404255	45	315	1	1	80	1	sub-9	0.237714	FALSE	-2.22412	-7.75687	1.89024	0	0	2	0.375	1.41504	1.76694	0.0021
845	1	1	46	46	(628.0540714566506, 'Miss', 'Miss')	336	630.854	0	631.855	635.755	left	0.904682	45	315	1	1	80	1	sub-9	0.424	TRUE	5.42054	7.84921	-9.09022	0	0	2	0.387755	1.36678	1.75848	0.00190755
846	1	1	47	47	(638.7562790963483, 'Miss', 'Miss')	372	641.857	0	642.857	647.008	right	1.15378	0	45	1	1	80	1	sub-9	0.490857	TRUE	5.693	5.04679	-1.25951	0	0	1	0.38	1.39593	1.75092	0.000324174
847	1	1	48	48	(650.0086053477497, 'Miss', 'Miss')	312	652.609	0	653.609	657.143	left	0.537936	45	315	1	1	80	1	sub-9	0.594857	TRUE	-3.62719	-1.60063	-1.36328	0	0	2	0.392157	1.3505	1.74281	0.000304693
848	1	1	49	49	(660.1440432400763, 'Miss', 'Miss')	324	662.844	0	663.844	667.179	right	0.337853	0	45	1	1	80	1	sub-9	0.345143	FALSE	3.10032	-0.15174	-5.20691	0	0	1	0.384615	1.37851	1.73553	0.00028511
849	1	1	50	50	(670.179440878495, 'Miss', 'Miss')	324	672.88	0	673.88	677.147	right	0.270976	0	45	1	1	80	1	sub-9	0.111429	FALSE	-4.64627	-0.90351	-1.10406	0	0	1	0.396226	1.3356	1.72775	0.00157217
850	1	1	51	51	(680.1482270386967, 'Miss', 'Miss')	372	683.248	1	684.249	689.1	right	1.8545	45	315	1	1	80	0	sub-9	0.434286	TRUE	-1.76902	-1.34159	3.40614	0	0	2	0.388889	1.36257	1.72073	0.000252098
851	1	1	52	52	(692.1006328269367, 'Miss', 'Miss')	384	695.301	1	696.301	700.769	left	1.4713	0	45	1	1	80	0	sub-9	0.376	FALSE	-7.12869	-5.42068	4.34968	0	0	1	0.4	1.32193	1.71327	0.000238117
852	1	1	53	53	(703.7697384938602, 'Miss', 'Miss')	312	706.37	1	707.37	710.671	right	0.304722	0	45	1	1	80	1	sub-9	0.367429	FALSE	-1.02147	-5.53506	0.670482	0	0	1	0.410714	1.28379	1.70542	0.00132481
853	1	1	54	54	(713.6717433936846, 'Miss', 'Miss')	348	716.572	1	717.572	720.956	left	0.387983	45	45	0	1	20	0	sub-9	0.243429	FALSE	3.91895	2.86282	-4.04743	0	0	3	0.0877193	3.51096	1.73443	0.0019915
854	1	1	55	55	(723.957229321601, 'Miss', 'Miss')	372	727.058	1	728.058	733.242	left	2.18687	45	315	1	1	80	1	sub-9	0.208571	FALSE	5.35005	-1.70186	-3.18281	0	0	2	0.37931	1.39855	1.7284	0.00199619
855	1	1	56	56	(736.2431222273423, 'Miss', 'Miss')	336	739.043	0	740.044	743.511	left	0.470533	45	315	1	1	80	1	sub-9	0.277714	FALSE	2.42572	-0.889074	-0.877319	0	0	2	0.389831	1.35908	1.72193	0.00130275
856	1	1	57	57	(746.5119040320211, 'Miss', 'Miss')	312	749.112	0	750.112	753.863	right	0.754157	0	45	1	1	80	1	sub-9	0.134857	FALSE	-1.30987	-8.70313	6.83241	0	0	1	0.4	1.32193	1.71508	0.000200061
857	1	1	58	58	(756.8639950574526, 'Miss', 'Miss')	312	759.464	1	760.464	764.832	right	1.37028	0	45	1	1	80	1	sub-9	0.551429	TRUE	1.10887	-0.606852	-3.17504	0	0	1	0.409836	1.28688	1.7079	0.00112022
858	1	1	59	59	(767.8329129930238, 'Miss', 'Miss')	360	770.833	0	771.833	775.217	right	0.386733	0	45	1	1	80	1	sub-9	0.248	FALSE	0.727446	2.25823	0.721026	0	0	1	0.419355	1.25376	1.70044	0.00104226
859	1	1	60	60	(778.2184136520392, 'Miss', 'Miss')	408	781.619	0	782.619	786.37	left	0.754568	45	45	0	1	20	0	sub-9	0.314857	FALSE	5.15177	2.23156	-1.2655	0	0	3	0.0952381	3.39232	1.72528	0.00149064
860	1	1	61	61	(789.3707285014033, 'Miss', 'Miss')	312	791.971	1	792.971	797.339	right	1.37082	0	45	1	1	80	1	sub-9	0.229143	FALSE	-4.54903	2.00877	0.0725215	0	0	1	0.421875	1.24511	1.71766	0.00146341
861	1	1	62	62	(800.3396616951751, 'Miss', 'Miss')	396	803.64	1	804.64	808.024	right	0.387014	0	315	0	1	20	0	sub-9	0	FALSE	2.28274	0.0508874	-1.2833	0	0	0	0.0923077	3.43741	1.74215	0.00145186
862	1	1	63	63	(811.0252073797536, 'Miss', 'Miss')	360	814.025	1	815.026	818.576	right	0.553086	45	315	1	1	80	0	sub-9	0.575429	TRUE	-1.07401	-5.81687	0.851904	0	0	2	0.363636	1.45943	1.73765	0.00148891
863	1	1	64	64	(821.5773109446519, 'Miss', 'Miss')	348	824.478	1	825.478	829.729	right	1.25316	0	45	1	1	80	1	sub-9	0.487429	TRUE	4.01404	5.61287	0.0481366	0	0	1	0.41791	1.25873	1.73039	0.000173901
864	1	1	65	65	(832.7296349489365, 'Miss', 'Miss')	324	835.43	0	836.43	840.514	right	1.08731	0	315	0	1	20	0	sub-9	0.604571	TRUE	-4.70005	-6.94794	4.50918	0	0	0	0.102941	3.28011	1.75158	0.00117802
865	1	1	66	66	(843.5152286552337, 'Miss', 'Miss')	300	846.015	1	847.016	851.233	left	1.22116	45	45	0	1	20	0	sub-9	0.262286	FALSE	-1.28993	-1.19988	-0.744294	0	0	3	0.101449	3.30117	1.77246	0.00221298
866	1	1	67	67	(854.2340888177085, 'Miss', 'Miss')	360	857.234	0	858.235	863.552	right	2.32053	45	315	1	1	80	0	sub-9	0.232571	FALSE	3.08599	1.08399	-2.27881	0	0	2	0.357143	1.48543	1.76816	0.00120455
867	1	1	68	68	(866.553327550013, 'Miss', 'Miss')	384	869.754	0	870.754	876.522	right	2.7716	0	45	1	1	80	1	sub-9	0.437143	TRUE	-2.47096	-2.28553	-0.597438	0	0	1	0.408451	1.29177	1.76134	0.000169957
868	1	1	69	69	(879.5226666119221, 'Miss', 'Miss')	336	882.323	1	883.323	888.207	right	1.88765	45	315	1	1	80	0	sub-9	0.427429	TRUE	2.67143	0.113067	0.363657	0	0	2	0.361111	1.46949	1.7571	0.000160618
869	1	1	70	70	(891.2083754205368, 'Miss', 'Miss')	336	894.009	0	895.009	899.41	left	1.40328	0	45	1	1	80	0	sub-9	0.304571	FALSE	0.0595647	1.39035	4.09015	0	0	1	0.410959	1.28293	1.75051	0.000154978
870	1	1	71	71	(902.4106805740079, 'Miss', 'Miss')	384	905.611	1	906.611	910.962	right	1.35317	45	315	1	1	80	0	sub-9	0.531429	TRUE	1.32669	0.458789	-0.981629	0	0	2	0.364865	1.45457	1.74634	0.000146734
871	1	1	72	72	(913.9630549026125, 'Miss', 'Miss')	372	917.063	0	918.064	924.715	right	3.65408	0	315	0	1	20	0	sub-9	1	TRUE	-0.836883	-1.99814	-0.593446	0	0	0	0.106667	3.22882	1.76483	0.000978652
872	1	1	73	73	(927.7159122781076, 'Miss', 'Miss')	300	930.216	0	931.216	937.851	right	3.63754	45	315	1	1	80	0	sub-9	0.481714	TRUE	-1.33159	-0.526372	-0.393238	0	0	2	0.368421	1.44057	1.76041	0.000960476
873	1	1	74	74	(940.8519494015871, 'Miss', 'Miss')	312	943.452	0	944.452	949.387	left	1.93671	0	45	1	1	80	0	sub-9	0.330857	FALSE	0.983203	-0.0840581	-2.19809	0	0	1	0.402597	1.31259	1.75449	0.000139066
874	1	1	75	75	(952.387610452034, 'Miss', 'Miss')	372	955.488	1	956.488	962.573	right	3.08733	45	315	1	1	80	0	sub-9	0.426286	TRUE	-2.24973	-11.9633	-0.884286	0	0	2	0.371795	1.42742	1.75016	0.000132452
875	1	1	76	76	(965.5736492539157, 'Miss', 'Miss')	348	968.474	1	969.474	975.825	left	3.35539	0	45	1	1	80	0	sub-9	0.550286	TRUE	-3.75075	-7.05829	4.09757	0	0	1	0.405063	1.30378	1.74441	0.000127798
876	1	1	77	77	(978.8263969090771, 'Miss', 'Miss')	324	981.527	1	982.527	989.428	left	3.90405	45	315	1	1	80	1	sub-9	0.789714	TRUE	-2.53256	-5.27205	1.60746	0	0	2	0.375	1.41504	1.74017	0.000121895
877	1	1	78	78	(992.4292251136666, 'Miss', 'Miss')	348	995.329	1	996.33	999.797	left	0.470525	0	45	1	1	80	0	sub-9	0.421714	TRUE	7.37372	6.11581	-3.93307	0	0	1	0.407407	1.29546	1.73459	0.000117721
878	1	1	79	79	(1002.7979742103117, 'Miss', 'Miss')	372	1005.9	1	1006.9	1010.57	right	0.671076	0	45	1	1	80	1	sub-9	0.245143	FALSE	-1.71886	1.03315	0.140289	0	0	1	0.414634	1.27009	1.72884	0.000607095
879	1	1	80	80	(1013.5668496448585, 'Miss', 'Miss')	396	1016.87	0	1017.87	1023.89	right	3.02142	45	315	1	1	80	0	sub-9	0.282857	FALSE	0.763104	-1.62813	4.08406	0	0	2	0.373494	1.42084	1.72501	0.00010868
880	1	1	81	81	(1026.8862706433051, 'Miss', 'Miss')	300	1029.39	1	1030.39	1033.77	left	0.387703	45	315	1	1	80	1	sub-9	0.289714	FALSE	2.92969	-6.39209	-0.681968	0	0	2	0.380952	1.39232	1.72093	0.000666468
881	1	1	82	82	(1036.7716313430074, 'Miss', 'Miss')	384	1039.97	1	1040.97	1044.99	right	1.02043	0	45	1	1	80	1	sub-9	0.241714	FALSE	0.271079	4.02711	3.19083	0	0	1	0.411765	1.28011	1.71566	0.000100545
882	1	1	83	83	(1047.9906120452674, 'Miss', 'Miss')	336	1050.79	0	1051.79	1055.76	right	0.97094	45	45	0	1	20	1	sub-9	0.377714	FALSE	-4.93193	-15.1777	5.29123	0	0	3	0.0930233	3.42626	1.73443	0.000843262
883	1	1	84	84	(1058.759490531454, 'Miss', 'Miss')	384	1061.96	0	1062.96	1066.41	right	0.453403	45	45	0	1	20	1	sub-9	0.309714	FALSE	-3.42948	-14.965	5.22749	0	0	3	0.103448	3.27302	1.75113	0.00341587
884	1	1	85	85	(1069.4117328350098, 'Miss', 'Miss')	300	1071.91	1	1072.91	1076.33	left	0.420752	45	315	1	1	80	1	sub-9	0.314286	FALSE	-1.35473	2.24699	-2.61933	0	0	2	0.375	1.41504	1.7472	0.000742284
885	1	1	86	86	(1079.3304393612752, 'Miss', 'Miss')	324	1082.03	0	1083.03	1088.35	right	2.32129	0	45	1	1	80	1	sub-9	0.229714	FALSE	4.87781	2.65392	2.39886	0	0	1	0.404494	1.30581	1.74216	9.94781e-05
886	1	1	87	87	(1091.3495132217859, 'Miss', 'Miss')	384	1094.55	1	1095.55	1098.77	left	0.221375	45	315	1	1	80	1	sub-9	0.366286	FALSE	0.421041	6.67165	-7.98184	0	0	2	0.377778	1.40439	1.73831	9.5446e-05
887	1	1	88	88	(1101.7683136553405, 'Miss', 'Miss')	324	1104.47	1	1105.47	1108.74	right	0.271198	0	45	1	1	80	1	sub-9	0.294286	FALSE	5.18532	10.6306	-8.78597	0	0	1	0.406593	1.29834	1.7334	9.24856e-05
888	1	1	89	89	(1111.7370329568812, 'Miss', 'Miss')	312	1114.34	1	1115.34	1118.49	left	0.153978	45	45	0	1	20	0	sub-9	0.115429	FALSE	9.10425	11.8152	-15.1154	0	0	3	0.108696	3.20163	1.74852	0.000620306
889	1	1	90	90	(1121.4890408667325, 'Miss', 'Miss')	348	1124.39	0	1125.39	1129.46	right	1.07026	0	45	1	1	80	1	sub-9	0.595429	TRUE	-0.143996	-0.714137	-0.248036	0	0	1	0.408602	1.29123	1.74354	0.000611958
890	1	1	91	91	(1132.4579388279317, 'Miss', 'Miss')	360	1135.46	0	1136.46	1144.69	right	5.23844	45	315	1	1	80	0	sub-9	0.582286	TRUE	-2.47452	0.19478	4.82136	1	1	2	0.37234	1.42531	1.74005	8.87286e-05
891	1	1	92	92	(1147.694425957362, 'Miss', 'Miss')	408	1151.09	1	1152.1	1159.8	right	4.70492	45	315	1	1	80	0	sub-9	0.485714	TRUE	0.307229	-0.525544	-0.473162	1	1	2	0.378947	1.39993	1.73638	0.00052534
892	1	1	93	93	(1162.7974978770294, 'Miss', 'Miss')	396	1166.1	1	1167.1	1170.5	left	0.403181	45	315	1	1	80	1	sub-9	0.235429	FALSE	2.93202	2.31028	-6.22993	0	0	2	0.385417	1.37551	1.73254	0.000500451
893	1	1	94	94	(1173.4997041296178, 'Miss', 'Miss')	336	1176.3	1	1177.3	1182.3	right	2.00447	0	45	1	1	80	1	sub-9	0.221143	FALSE	2.60521	6.94509	-2.05573	0	0	1	0.402062	1.31451	1.72816	7.97245e-05
894	1	1	95	95	(1185.3021656380329, 'Miss', 'Miss')	324	1188	1	1189	1192.37	left	0.370519	45	315	1	1	80	1	sub-9	0.359429	FALSE	-2.73729	6.73232	1.64713	0	0	2	0.387755	1.36678	1.7244	7.69146e-05
895	1	1	96	96	(1195.3709190902005, 'Miss', 'Miss')	384	1198.57	1	1199.57	1202.82	left	0.252989	45	315	1	1	80	1	sub-9	0.359429	FALSE	-4.09849	-6.57752	-7.35227	0	0	2	0.393939	1.34395	1.72048	0.000453887
896	1	1	97	97	(1205.8230278983715, 'Miss', 'Miss')	396	1209.12	0	1210.12	1213.87	right	0.753204	45	315	1	1	80	0	sub-9	0.119429	FALSE	0.583952	1.44035	-2.81889	0	0	2	0.4	1.32193	1.71643	0.000433664
897	1	1	98	98	(1216.8752922292201, 'Miss', 'Miss')	372	1219.98	1	1220.98	1224.36	right	0.38644	0	315	0	1	20	0	sub-9	0.109143	FALSE	4.01145	1.40085	-2.36801	0	0	0	0.0891089	3.48829	1.73311	0.000652527
898	1	1	99	99	(1227.3607660060607, 'Miss', 'Miss')	360	1230.36	1	1231.36	1234.88	left	0.520286	0	315	0	1	20	1	sub-9	0.416571	TRUE	1.98904	6.41896	3.98697	0	0	0	0.0980392	3.3505	1.74821	0.00262914
899	1	1	100	100	(1237.8796266678946, 'Miss', 'Miss')	384	1241.08	0	1242.08	1247.08	right	2.00482	0	45	1	1	80	1	sub-9	0.553143	TRUE	0.903292	-6.15258	3.76402	0	0	1	0.38835	1.36457	1.74441	0.000573307
900	1	2	101	1	(1752.2749352982937, 'Miss', 'Miss')	300	1754.78	0	1755.78	1760.08	right	1.30388	0	45	1	1	80	1	sub-9	0.547429	TRUE	3.02078	2.667	-2.46155	0	0	1	0.394231	1.34289	1.74049	0.000410741
901	1	2	102	2	(1763.0790946283087, 'Miss', 'Miss')	312	1765.68	0	1766.68	1770.18	left	0.504038	45	315	1	1	80	1	sub-9	0.231429	FALSE	2.85833	1.65928	-2.75485	0	0	2	0.390476	1.35669	1.73677	6.92176e-05
902	1	2	103	3	(1773.1811875263375, 'Miss', 'Miss')	396	1776.48	0	1777.48	1786.55	right	6.07181	0	45	1	1	80	1	sub-9	0.420571	TRUE	-0.316103	0.354919	0.858905	1	1	1	0.396226	1.3356	1.73292	6.71559e-05
903	1	2	104	4	(1789.551188905124, 'Miss', 'Miss')	348	1792.45	0	1793.45	1812.02	right	15.5735	0	315	0	1	20	0	sub-9	0.192571	FALSE	1.50616	-5.59756	4.97357	1	1	0	0.102804	3.28204	1.74674	0.000496896
904	1	2	105	5	(1815.0231347612603, 'Miss', 'Miss')	336	1817.82	1	1818.82	1824.74	right	2.92083	0	45	1	1	80	1	sub-9	0.190857	FALSE	1.28524	2.58146	-0.0117258	0	0	1	0.398148	1.32862	1.74281	0.000491034
905	1	2	106	6	(1827.7423849788283, 'Miss', 'Miss')	360	1830.74	0	1831.74	1835.24	left	0.503958	0	45	1	1	80	0	sub-9	0.236	FALSE	1.01507	-0.21551	2.25786	0	0	1	0.40367	1.30875	1.73878	0.000359383
906	1	2	107	7	(1838.2445276463336, 'Miss', 'Miss')	312	1840.84	1	1841.84	1845.23	right	0.388291	0	45	1	1	80	1	sub-9	0.382857	FALSE	-0.995014	-6.33434	1.4705	0	0	1	0.409091	1.28951	1.73465	0.000344995
907	1	2	108	8	(1848.2299591163446, 'Miss', 'Miss')	396	1851.53	0	1852.53	1856.18	right	0.654181	0	45	1	1	80	1	sub-9	0.0754286	FALSE	6.68562	8.65781	-11.6838	0	0	1	0.414414	1.27085	1.73042	0.000331403
908	1	2	109	9	(1859.182204554767, 'Miss', 'Miss')	324	1861.88	1	1862.88	1866.28	right	0.403482	0	315	0	1	20	0	sub-9	0.654286	TRUE	1.78229	3.89149	-0.0837639	0	0	0	0.107143	3.22239	1.74317	0.000426886
909	1	2	110	10	(1869.2842328135093, 'Miss', 'Miss')	312	1871.88	0	1872.88	1876.5	right	0.619829	0	45	1	1	80	1	sub-9	0.413143	TRUE	-3.15628	-3.07421	0.774634	0	0	1	0.415929	1.26559	1.7389	0.000422267
910	1	2	111	11	(1879.5030476175152, 'Miss', 'Miss')	396	1882.8	1	1883.8	1890.34	right	3.53706	45	315	1	1	80	0	sub-9	0.116571	FALSE	-1.48489	-5.03046	2.84093	0	0	2	0.368421	1.44057	1.73621	5.99587e-05
911	1	2	112	12	(1893.3392336332909, 'Miss', 'Miss')	336	1896.14	1	1897.14	1903.47	left	3.3383	0	315	0	1	20	1	sub-9	0.162286	FALSE	-0.422378	2.07392	2.03362	0	0	0	0.113043	3.14505	1.74794	0.000396503
912	1	2	113	13	(1906.4752613244282, 'Miss', 'Miss')	348	1909.38	1	1910.38	1913.93	left	0.554641	0	45	1	1	80	0	sub-9	0.489714	TRUE	-5.91541	-2.02473	4.06777	0	0	1	0.413793	1.27302	1.74381	0.000376893
913	1	2	114	14	(1916.9274125781394, 'Miss', 'Miss')	372	1920.03	0	1921.03	1924.63	left	0.603738	0	45	1	1	80	0	sub-9	0.612	TRUE	-1.13666	0.183174	-4.01926	0	0	1	0.418803	1.25565	1.7396	0.000292899
914	1	2	115	15	(1927.6296046822144, 'Miss', 'Miss')	384	1930.83	0	1931.83	1935.23	right	0.40492	0	45	1	1	80	1	sub-9	0.232571	FALSE	-2.25551	-3.15251	1.70556	0	0	1	0.423729	1.23879	1.73532	0.00028217
915	1	2	116	16	(1938.231738777385, 'Miss', 'Miss')	324	1940.93	1	1941.93	1945.28	right	0.353245	0	45	1	1	80	1	sub-9	0.171429	FALSE	-3.50808	-5.95972	-3.02179	0	0	1	0.428571	1.22239	1.73098	0.000271983
916	1	2	117	17	(1948.2838388745108, 'Miss', 'Miss')	336	1951.08	0	1952.08	1957.1	left	2.02144	45	315	1	1	80	1	sub-9	0.125714	FALSE	-1.49537	0.602182	1.04978	0	0	2	0.358333	1.48063	1.72883	5.44399e-05
917	1	2	118	18	(1960.1029115698498, 'Miss', 'Miss')	384	1963.3	0	1964.3	1967.87	left	0.569682	45	315	1	1	80	1	sub-9	0.351429	FALSE	-2.40995	-3.93385	4.67834	0	0	2	0.363636	1.45943	1.72653	0.000345679
918	1	2	119	19	(1970.8718233466561, 'Miss', 'Miss')	324	1973.57	0	1974.57	1977.94	right	0.370368	0	45	1	1	80	1	sub-9	0.848	TRUE	-3.55446	-10.7098	7.07311	0	0	1	0.42623	1.2303	1.72243	5.15411e-05
919	1	2	120	20	(1980.940591224759, 'Miss', 'Miss')	312	1983.54	1	1984.54	1987.86	left	0.321096	45	315	1	1	80	1	sub-9	0.123429	FALSE	2.70977	4.13376	1.2336	0	0	2	0.365854	1.45066	1.72016	4.97899e-05
920	1	2	121	21	(1990.8592486473603, 'Miss', 'Miss')	324	1993.56	1	1994.56	1998.16	left	0.604779	45	315	1	1	80	1	sub-9	0.229143	FALSE	-0.37422	-2.64468	0.533441	0	0	2	0.370968	1.43063	1.71777	0.000318865
921	1	2	122	22	(2001.1613532525907, 'Miss', 'Miss')	300	2003.66	1	2004.66	2007.91	right	0.254061	0	45	1	1	80	1	sub-9	0	FALSE	4.03692	0.555833	-2.00831	0	0	1	0.424	1.23786	1.7139	4.72176e-05
922	1	2	123	23	(2010.9133447945537, 'Miss', 'Miss')	384	2014.11	1	2015.11	2018.41	left	0.303337	45	315	1	1	80	1	sub-9	0.127429	FALSE	5.0324	10.4832	-12.365	0	0	2	0.373016	1.42269	1.71153	4.5706e-05
923	1	2	124	24	(2021.4155052170563, 'Miss', 'Miss')	372	2024.52	0	2025.52	2029.77	left	1.25455	0	45	1	1	80	0	sub-9	0.214857	FALSE	1.48166	3.32163	0.832324	0	0	1	0.425197	1.2338	1.70774	4.48202e-05
924	1	2	125	25	(2032.7678564641642, 'Miss', 'Miss')	348	2035.67	1	2036.67	2040.04	left	0.369696	45	45	0	1	20	0	sub-9	0.493714	TRUE	-0.426265	4.7009	-0.798948	0	0	3	0.0859375	3.54057	1.72149	0.000421324
925	1	2	126	26	(2043.0366288365012, 'Miss', 'Miss')	312	2045.64	0	2046.64	2052.02	left	2.38723	0	45	1	1	80	0	sub-9	0.241714	FALSE	-2.34413	-2.66294	2.98353	0	0	1	0.426357	1.22987	1.71766	0.000417589
926	1	2	127	27	(2055.0224087483307, 'Miss', 'Miss')	324	2057.72	1	2058.72	2062.52	right	0.803836	0	45	1	1	80	1	sub-9	0.693714	TRUE	-4.95425	-6.9797	4.26646	0	0	1	0.430769	1.21501	1.71376	0.000225835
927	1	2	128	28	(2065.5245783257537, 'Miss', 'Miss')	384	2068.72	0	2069.73	2073.14	right	0.420981	45	315	1	1	80	0	sub-9	0.837714	TRUE	1.17262	-1.00443	-0.536157	0	0	2	0.366412	1.44846	1.71168	4.27852e-05
928	1	2	129	29	(2076.1434348540024, 'Miss', 'Miss')	324	2078.84	1	2079.84	2084.03	right	1.1866	0	45	1	1	80	1	sub-9	0.121143	FALSE	-4.9228	-5.28263	3.98235	0	0	1	0.431818	1.2115	1.70787	4.20452e-05
929	1	2	130	30	(2087.028907632124, 'Miss', 'Miss')	312	2089.63	1	2090.63	2094.23	right	0.603478	45	45	0	1	20	1	sub-9	0.344	FALSE	0.0936308	-2.04611	0.0450924	0	0	3	0.0902256	3.47032	1.72062	0.000368218
930	1	2	131	31	(2097.2310654746034, 'Miss', 'Miss')	360	2100.23	0	2101.23	2106.52	right	2.2876	45	315	1	1	80	0	sub-9	0.376	FALSE	3.30226	-3.26644	1.38305	0	0	2	0.365672	1.45138	1.71856	0.00038181
931	1	2	132	32	(2109.5169705869052, 'Miss', 'Miss')	408	2112.92	0	2113.92	2117.7	right	0.787015	0	45	1	1	80	1	sub-9	0.125143	FALSE	0.904476	3.02601	2.79559	0	0	1	0.42963	1.21883	1.71483	4.08969e-05
932	1	2	133	33	(2120.702555249251, 'Miss', 'Miss')	384	2123.9	1	2124.9	2128.69	right	0.786701	0	45	1	1	80	1	sub-9	0.146857	FALSE	1.22084	-2.83757	1.83563	0	0	1	0.433824	1.20482	1.71106	0.000203777
933	1	2	134	34	(2131.688128759239, 'Miss', 'Miss')	384	2134.89	1	2135.89	2139.29	right	0.404567	45	315	1	1	80	0	sub-9	0.190857	FALSE	7.2534	11.8795	-9.1191	0	0	2	0.364964	1.45418	1.70913	3.89608e-05
934	1	2	135	35	(2142.2903188936193, 'Miss', 'Miss')	396	2145.59	1	2146.59	2150.64	right	1.05376	0	45	1	1	80	1	sub-9	0.348571	FALSE	2.48941	1.30044	-2.39382	0	0	1	0.434783	1.20163	1.70543	3.83341e-05
935	1	2	136	36	(2153.642654882527, 'Miss', 'Miss')	336	2156.44	0	2157.44	2160.91	right	0.46984	0	315	0	1	20	0	sub-9	0.242286	FALSE	4.39256	8.07192	-3.26443	0	0	0	0.100719	3.31159	1.71658	0.000296342
936	1	2	137	37	(2163.9114882876665, 'Miss', 'Miss')	324	2166.61	0	2167.61	2171.08	right	0.471608	0	45	1	1	80	1	sub-9	0.364571	FALSE	-2.77664	-5.00733	2.07328	0	0	1	0.435714	1.19855	1.71286	0.000293915
937	1	2	138	38	(2174.080218464143, 'Miss', 'Miss')	348	2176.98	0	2177.98	2181.88	left	0.904159	45	315	1	1	80	1	sub-9	0.292	FALSE	4.43883	5.4641	-3.61752	0	0	2	0.361702	1.46713	1.71107	3.73332e-05
938	1	2	139	39	(2184.882393395807, 'Miss', 'Miss')	384	2188.08	1	2189.08	2192.73	left	0.654144	0	45	1	1	80	0	sub-9	0.192	FALSE	1.54572	-3.42233	0.084699	0	0	1	0.43662	1.19555	1.70742	3.67652e-05
939	1	2	140	40	(2195.734667380935, 'Miss', 'Miss')	348	2198.63	1	2199.64	2204.7	left	2.07135	45	315	1	1	80	1	sub-9	0.284571	FALSE	5.8432	8.07195	-4.9574	0	0	2	0.363636	1.45943	1.70564	3.56365e-05
940	1	2	141	41	(2207.703704885315, 'Miss', 'Miss')	396	2211	0	2212	2216.06	right	1.05349	0	45	1	1	80	1	sub-9	0.553714	TRUE	0.384359	2.78925	0.23055	0	0	1	0.4375	1.19265	1.70205	3.51014e-05
941	1	2	142	42	(2219.0561157781167, 'Miss', 'Miss')	408	2222.46	0	2223.46	2228.82	right	2.37042	45	315	1	1	80	0	sub-9	0.66	TRUE	2.76224	6.81331	-3.34086	0	0	2	0.365517	1.45199	1.70028	3.40416e-05
942	1	2	143	43	(2231.825364899869, 'Miss', 'Miss')	300	2234.33	0	2235.33	2239.01	right	0.686695	0	45	1	1	80	1	sub-9	0.130857	FALSE	-3.20349	-3.14585	2.66481	0	0	1	0.438356	1.18982	1.69677	3.35371e-05
943	1	2	144	44	(2242.0108258320784, 'Miss', 'Miss')	372	2245.11	0	2246.11	2249.63	left	0.520531	45	315	1	1	80	1	sub-9	0.400571	TRUE	-2.53313	-5.85708	-3.45037	0	0	2	0.367347	1.44478	1.69501	3.2541e-05
944	1	2	145	45	(2252.629661276268, 'Miss', 'Miss')	396	2255.93	0	2256.93	2260.35	left	0.421086	45	45	0	1	20	0	sub-9	0.589143	TRUE	4.03725	1.06073	-4.28874	0	0	3	0.0878378	3.50901	1.70685	0.00032117
945	1	2	146	46	(2263.3485416905364, 'Miss', 'Miss')	384	2266.55	0	2267.55	2270.92	right	0.370608	45	315	1	1	80	0	sub-9	0.232571	FALSE	0.678436	-0.72979	4.76608	0	0	2	0.369128	1.43781	1.705	0.000318305
946	1	2	147	47	(2273.917377675699, 'Miss', 'Miss')	300	2276.42	1	2277.42	2281.32	left	0.90335	45	315	1	1	80	1	sub-9	0.435429	TRUE	0.689164	3.41009	3.06591	0	0	2	0.373333	1.42146	1.70307	0.000215616
947	1	2	148	48	(2284.319470934376, 'Miss', 'Miss')	372	2287.42	0	2288.42	2291.9	left	0.486467	45	315	1	1	80	1	sub-9	0.214286	FALSE	-4.35	-5.39963	0.00218703	0	0	2	0.377483	1.40551	1.70106	0.000209021
948	1	2	149	49	(2294.90496166169, 'Miss', 'Miss')	312	2297.51	1	2298.51	2302.02	right	0.520446	0	315	0	1	20	0	sub-9	0.377143	FALSE	3.57409	1.01637	-2.16449	0	0	0	0.0986842	3.34104	1.71151	0.000265442
949	1	2	150	50	(2305.0237600700657, 'Miss', 'Miss')	336	2307.82	0	2308.82	2312.34	left	0.519966	45	315	1	1	80	1	sub-9	0.249714	FALSE	-3.28157	-4.77547	1.66384	0	0	2	0.379085	1.39941	1.70943	0.000263126
950	1	2	151	51	(2315.3424911204206, 'Miss', 'Miss')	396	2318.64	0	2319.64	2324.06	right	1.42048	0	45	1	1	80	1	sub-9	0.242286	FALSE	-4.14644	-3.87308	-3.3016	0	0	1	0.422078	1.24442	1.70639	2.98724e-05
951	1	2	152	52	(2327.061600962543, 'Miss', 'Miss')	396	2330.36	0	2331.36	2334.75	left	0.386664	45	315	1	1	80	1	sub-9	0.253714	FALSE	-5.9932	-3.58994	-0.505208	0	0	2	0.380645	1.39348	1.70434	2.91231e-05
952	1	2	153	53	(2337.7471394341537, 'Miss', 'Miss')	348	2340.65	1	2341.65	2345.05	left	0.403753	45	315	1	1	80	1	sub-9	0.378857	FALSE	-2.78503	-1.73339	2.30504	0	0	2	0.384615	1.37851	1.70221	0.000189972
953	1	2	154	54	(2348.0492232327465, 'Miss', 'Miss')	372	2351.15	0	2352.15	2355.82	right	0.669929	0	45	1	1	80	1	sub-9	0.196571	FALSE	4.57557	-6.63897	5.98981	0	0	1	0.420382	1.25023	1.69931	2.79329e-05
954	1	2	155	55	(2358.818101718933, 'Miss', 'Miss')	312	2361.42	1	2362.42	2365.67	left	0.254589	0	315	0	1	20	1	sub-9	0.300571	FALSE	4.53052	1.6688	-2.82655	0	0	0	0.101266	3.30378	1.70915	0.000231115
955	1	2	156	56	(2368.670121308244, 'Miss', 'Miss')	300	2371.17	0	2372.17	2375.74	left	0.570125	45	315	1	1	80	1	sub-9	0.125143	FALSE	0.392145	-6.82801	-1.85515	0	0	2	0.383648	1.38215	1.70707	0.000235932
956	1	2	157	57	(2378.738883360488, 'Miss', 'Miss')	384	2381.94	0	2382.94	2386.27	left	0.337478	45	45	0	1	20	0	sub-9	0.374286	FALSE	3.96165	5.48955	-3.93674	0	0	3	0.0875	3.51457	1.71801	0.000273477
957	1	2	158	58	(2389.274356873778, 'Miss', 'Miss')	396	2392.57	1	2393.57	2399.19	left	2.6203	45	315	1	1	80	1	sub-9	0.309714	FALSE	1.03806	6.44759	0.328385	0	0	2	0.385093	1.37672	1.71586	0.000271319
958	1	2	159	59	(2402.193687321739, 'Miss', 'Miss')	360	2405.19	1	2406.19	2410.46	right	1.27142	0	45	1	1	80	1	sub-9	0.189143	FALSE	-2.24363	0.319134	3.94166	0	0	1	0.41358	1.27376	1.71311	2.72262e-05
959	1	2	160	60	(2413.4626882896637, 'Miss', 'Miss')	312	2416.06	1	2417.06	2421.4	left	1.33787	45	315	1	1	80	1	sub-9	0.166857	FALSE	-2.36637	-1.24376	4.21235	0	0	2	0.386503	1.37145	1.71098	2.6615e-05
960	1	2	161	61	(2424.398228772583, 'Miss', 'Miss')	324	2427.1	1	2428.1	2431.42	left	0.32072	45	315	1	1	80	1	sub-9	0.233714	FALSE	-0.219686	-2.41003	-5.79499	0	0	2	0.390244	1.35755	1.7088	0.000167836
961	1	2	162	62	(2434.4169666752573, 'Miss', 'Miss')	348	2437.32	0	2438.32	2441.77	right	0.454306	45	315	1	1	80	0	sub-9	0.183429	FALSE	-2.30728	-1.27873	1.36242	0	0	2	0.393939	1.34395	1.70656	0.000163247
962	1	2	163	63	(2444.7690859977156, 'Miss', 'Miss')	384	2447.97	0	2448.97	2452.57	left	0.604512	45	45	0	1	20	0	sub-9	0.268	FALSE	3.99389	3.48778	-0.638538	0	0	3	0.0903614	3.46815	1.71685	0.000243591
963	1	2	164	64	(2455.5713361106955, 'Miss', 'Miss')	384	2458.77	0	2459.77	2463.44	right	0.670683	45	45	0	1	20	1	sub-9	0.334857	FALSE	4.01033	1.62547	-3.29602	0	0	3	0.0958084	3.3837	1.72654	0.0009942
964	1	2	165	65	(2466.4402049148607, 'Miss', 'Miss')	408	2469.84	1	2470.84	2474.16	left	0.320038	45	315	1	1	80	1	sub-9	0.420571	TRUE	-0.507255	6.45403	-5.21748	0	0	2	0.392857	1.34792	1.72426	0.000223898
965	1	2	166	66	(2477.159058974055, 'Miss', 'Miss')	360	2480.16	1	2481.16	2484.61	left	0.454686	45	315	1	1	80	1	sub-9	0.329143	FALSE	2.16912	4.83932	-8.63398	0	0	2	0.39645	1.33479	1.72193	0.000153975
966	1	2	167	67	(2487.611188866285, 'Miss', 'Miss')	336	2490.41	1	2491.41	2494.65	left	0.237019	45	315	1	1	80	1	sub-9	0.163429	FALSE	0.180286	-7.6712	-2.95517	0	0	2	0.4	1.32193	1.71955	0.000149924
967	1	2	168	68	(2497.6466433761793, 'Miss', 'Miss')	348	2500.55	0	2501.55	2504.96	right	0.420014	45	315	1	1	80	0	sub-9	0.395429	FALSE	2.86808	4.71588	-3.72113	0	0	2	0.403509	1.30933	1.71713	0.00014602
968	1	2	169	69	(2507.9654168720745, 'Miss', 'Miss')	360	2510.97	0	2511.97	2515.7	right	0.736573	0	315	0	1	20	0	sub-9	0.228571	FALSE	3.24472	-3.53956	5.61505	0	0	0	0.0988372	3.3388	1.72629	0.000203583
969	1	2	170	70	(2518.7009373251376, 'Miss', 'Miss')	336	2521.5	1	2522.5	2526.25	left	0.753407	45	315	1	1	80	1	sub-9	0.418857	TRUE	-3.22214	-1.63425	2.4564	0	0	2	0.404624	1.30535	1.72383	0.000202122
970	1	2	171	71	(2529.253101922838, 'Miss', 'Miss')	372	2532.35	0	2533.35	2536.92	right	0.571665	0	45	1	1	80	1	sub-9	0.373714	FALSE	1.26641	2.83474	2.84739	0	0	1	0.390805	1.35548	1.72169	2.39887e-05
971	1	2	172	72	(2539.9219432067575, 'Miss', 'Miss')	384	2543.12	1	2544.12	2547.42	left	0.30407	45	315	1	1	80	1	sub-9	0.250286	FALSE	1.9547	1.46486	-4.28867	0	0	2	0.405714	1.30146	1.71927	2.35759e-05
972	1	2	173	73	(2550.4240259511475, 'Miss', 'Miss')	348	2553.32	1	2554.32	2558.98	right	1.65437	0	315	0	1	20	0	sub-9	0.572571	TRUE	-1.04452	2.44009	0.386632	0	0	0	0.102273	3.28951	1.72794	0.000186665
973	1	2	174	74	(2561.9764860030978, 'Miss', 'Miss')	324	2564.68	1	2565.68	2568.94	left	0.27039	45	315	1	1	80	1	sub-9	0.68	TRUE	-2.33889	-4.9763	5.33912	0	0	2	0.40678	1.29768	1.72549	0.000185353
974	1	2	175	75	(2571.9452097433873, 'Miss', 'Miss')	396	2575.25	1	2576.25	2579.71	left	0.470013	45	315	1	1	80	1	sub-9	0.138286	FALSE	-2.99257	-0.14463	-5.32474	0	0	2	0.410112	1.28591	1.723	0.000131108
975	1	2	176	76	(2582.714029693568, 'Miss', 'Miss')	372	2585.81	1	2586.81	2590.32	left	0.50453	0	45	1	1	80	0	sub-9	0.220571	FALSE	3.53	11.2043	-7.05282	0	0	1	0.385475	1.37529	1.72104	2.27286e-05
976	1	2	177	77	(2593.3161970793585, 'Miss', 'Miss')	336	2596.12	1	2597.12	2600.45	left	0.336896	45	45	0	1	20	0	sub-9	0.336	FALSE	1.95984	3.82622	-1.98558	0	0	3	0.0944444	3.40439	1.73013	0.000198719
977	1	2	178	78	(2603.451605010127, 'Miss', 'Miss')	336	2606.25	0	2607.25	2611.9	right	1.65479	0	45	1	1	80	1	sub-9	0.148571	FALSE	5.49613	-0.95965	-1.73502	0	0	1	0.38674	1.37056	1.72812	0.000197303
978	1	2	179	79	(2614.9039501816974, 'Miss', 'Miss')	396	2618.2	1	2619.2	2623.99	right	1.78652	45	45	0	1	20	1	sub-9	0.329714	FALSE	3.28749	2.72642	-0.491841	0	0	3	0.0989011	3.33787	1.73672	0.000184295
979	1	2	180	80	(2626.98980447032, 'Miss', 'Miss')	324	2629.69	0	2630.69	2635.46	left	1.77018	45	315	1	1	80	1	sub-9	0.371429	FALSE	2.17265	-2.38096	7.37448	0	0	2	0.404372	1.30625	1.73435	0.000180766
980	1	2	181	81	(2638.4588049388854, 'Miss', 'Miss')	348	2641.36	1	2642.36	2645.89	right	0.536641	0	45	1	1	80	1	sub-9	0.118286	FALSE	2.51331	-4.92973	-3.93003	0	0	1	0.38587	1.37381	1.73237	2.21987e-05
981	1	2	182	82	(2648.8942803663854, 'Miss', 'Miss')	336	2651.69	1	2652.69	2656.13	right	0.436549	45	45	0	1	20	1	sub-9	0.316	FALSE	-2.47353	-7.27799	1.08903	0	0	3	0.102703	3.28345	1.74053	0.00017099
982	1	2	183	83	(2659.1297224477817, 'Miss', 'Miss')	396	2662.43	1	2663.43	2666.76	right	0.336463	0	45	1	1	80	1	sub-9	0.146857	FALSE	0.397008	-7.25518	-2.13159	0	0	1	0.387097	1.36923	1.73851	0.000169778
983	1	2	184	84	(2669.76522733748, 'Miss', 'Miss')	360	2672.77	1	2673.77	2677.08	right	0.321419	0	45	1	1	80	1	sub-9	0.424	TRUE	0.860253	1.99503	-11.711	0	0	1	0.390374	1.35707	1.73645	0.000128996
984	1	2	185	85	(2680.0840183109503, 'Miss', 'Miss')	336	2682.88	0	2683.88	2687.35	right	0.470045	0	45	1	1	80	1	sub-9	0.524571	TRUE	5.67108	10.0305	-10.0576	0	0	1	0.393617	1.34514	1.73435	0.000125897
985	1	2	186	86	(2690.3527046825197, 'Miss', 'Miss')	408	2693.75	0	2694.75	2698.05	right	0.303429	0	315	0	1	20	0	sub-9	0.118857	FALSE	9.25964	13.8963	-2.1299	0	0	0	0.100529	3.31431	1.74249	0.000166985
986	1	2	187	87	(2701.055017465091, 'Miss', 'Miss')	312	2703.66	1	2704.66	2709.69	right	2.03779	0	45	1	1	80	1	sub-9	0.358286	FALSE	-1.6352	-4.88136	8.32537	0	0	1	0.394737	1.34104	1.74036	0.000165859
987	1	2	188	88	(2712.6906505236752, 'Miss', 'Miss')	324	2715.39	0	2716.39	2720.88	left	1.48744	45	315	1	1	80	1	sub-9	0.354286	FALSE	0.885387	-3.83198	4.55279	0	0	2	0.39267	1.34861	1.73828	2.09258e-05
988	1	2	189	89	(2723.8763092576496, 'Miss', 'Miss')	348	2726.78	0	2727.78	2731.11	left	0.338155	45	315	1	1	80	1	sub-9	0.122286	FALSE	-4.24984	-4.10497	-5.35762	0	0	2	0.395833	1.33703	1.73618	0.000119586
989	1	2	190	90	(2734.111755500373, 'Miss', 'Miss')	372	2737.21	0	2738.21	2741.68	left	0.470977	45	315	1	1	80	1	sub-9	0.296	FALSE	0.255313	7.90757	-1.88388	0	0	2	0.398964	1.32567	1.73403	0.000116808
990	1	2	191	91	(2744.6805618013996, 'Miss', 'Miss')	300	2747.18	0	2748.18	2751.78	left	0.604783	0	315	0	1	20	1	sub-9	0.145714	FALSE	4.39614	7.47226	-9.69951	0	0	0	0.103093	3.27798	1.74179	0.000153384
991	1	2	192	92	(2754.7826499832577, 'Miss', 'Miss')	396	2758.08	1	2759.08	2762.48	right	0.404917	0	45	1	1	80	1	sub-9	0	FALSE	6.15156	-2.27726	-5.3214	0	0	1	0.389744	1.3594	1.73981	0.000153615
992	1	2	193	93	(2765.484864558501, 'Miss', 'Miss')	312	2768.09	1	2769.09	2772.52	right	0.437262	45	315	1	1	80	0	sub-9	0.137714	FALSE	8.32791	7.98078	-0.135542	0	0	2	0.397959	1.32931	1.73769	1.98593e-05
993	1	2	194	94	(2775.5202516548907, 'Miss', 'Miss')	384	2778.72	0	2779.72	2783.4	left	0.68807	45	315	1	1	80	1	sub-9	0.261714	FALSE	-3.14698	-4.72901	-0.567969	0	0	2	0.401015	1.31827	1.73555	0.000111154
994	1	2	195	95	(2786.4057871303457, 'Miss', 'Miss')	312	2789.01	0	2790.01	2793.52	left	0.521161	45	45	0	1	20	0	sub-9	0.116571	FALSE	6.0078	14.5938	-7.18703	0	0	3	0.10101	3.30743	1.74329	0.000150634
995	1	2	196	96	(2796.5245863709865, 'Miss', 'Miss')	360	2799.52	1	2800.53	2806.56	left	3.03758	0	45	1	1	80	0	sub-9	0.343429	FALSE	-2.6069	-6.69578	4.68888	0	0	1	0.386935	1.36984	1.74139	0.000151424
996	1	2	197	97	(2809.560582408293, 'Miss', 'Miss')	348	2812.46	1	2813.46	2817	right	0.538013	0	45	1	1	80	1	sub-9	0.338286	FALSE	-2.12426	-0.23851	2.86431	0	0	1	0.39	1.35845	1.73946	0.000112941
997	1	2	198	98	(2819.996034254938, 'Miss', 'Miss')	384	2823.2	1	2824.2	2828.05	right	0.853724	0	45	1	1	80	1	sub-9	0.429143	TRUE	-0.146146	-3.17681	1.86901	0	0	1	0.393035	1.34727	1.73749	0.0001104
998	1	2	199	99	(2831.0482999728956, 'Miss', 'Miss')	312	2833.65	0	2834.65	2838.22	left	0.57101	0	45	1	1	80	0	sub-9	0.505714	TRUE	-1.31399	1.53508	2.48416	0	0	1	0.39604	1.33628	1.73549	0.00010794
999	1	2	200	100	(2841.21703736234, 'Miss', 'Miss')	336	2844.02	1	2845.02	2849.3	left	1.28661	45	315	1	1	80	1	sub-9	0.520571	TRUE	1.65948	3.13707	-3.49901	0	0	2	0.394089	1.34341	1.73354	1.82442e-05
1000	1	1	1	1	(91.1724820293075, 'Miss', 'Miss')	324	93.8759	1	94.8762	100.194	left	2.32053	0	45	1	1	80	0	sub-10	0.0645714	FALSE	-14.9835	-4.38537	9.94514	0	0	1	0.25	2	1.92193	0.0780719
1001	1	1	2	2	(103.19490326162031, 'Miss', 'Miss')	312	105.795	1	106.795	110.446	left	0.65378	45	315	1	1	80	1	sub-10	0.109143	FALSE	-4.29497	-9.45746	6.44972	0	0	2	0.2	2.32193	1.9183	0.0817042
1002	1	1	3	3	(113.44698260759287, 'Miss', 'Miss')	336	116.247	1	117.247	120.915	left	0.670005	0	45	1	1	80	0	sub-10	0	FALSE	3.79923	11.2155	-13.7348	0	0	1	0.333333	1.58496	1.84237	0.0509857
1003	1	1	4	4	(123.91585851375658, 'Miss', 'Miss')	360	126.916	0	127.916	131.967	left	1.05352	45	315	1	1	80	1	sub-10	0.000571429	FALSE	7.57143	8.39311	-10.3768	0	0	2	0.285714	1.80735	1.81128	0.0236844
1004	1	1	5	5	(134.9680817861754, 'Miss', 'Miss')	312	137.568	1	138.569	142.003	right	0.436781	45	45	0	1	20	1	sub-10	0.172571	FALSE	5.39645	3.95441	-4.11943	0	0	3	0.125	3	1.89106	0.0546396
1005	1	1	6	6	(145.00352436692992, 'Miss', 'Miss')	324	147.704	0	148.704	152.555	left	0.853678	0	45	1	1	80	0	sub-10	0.105143	FALSE	9.1606	10.167	-17.0714	0	0	1	0.333333	1.58496	1.84644	0.0440869
1006	1	1	7	7	(155.55572391978149, 'Miss', 'Miss')	348	158.456	0	159.456	162.89	right	0.436926	0	45	1	1	80	1	sub-10	0.200571	FALSE	4.65635	-2.35913	3.48334	0	0	1	0.4	1.32193	1.78993	0.0454777
1007	1	1	8	8	(165.89115382235923, 'Miss', 'Miss')	360	168.891	1	169.892	174.126	left	1.23782	45	315	1	1	80	1	sub-10	0.413143	TRUE	1.33627	2.80851	-3.37575	0	0	2	0.272727	1.87447	1.78416	0.00944813
1008	1	1	9	9	(177.12682560903067, 'Miss', 'Miss')	312	179.727	1	180.727	185.061	right	1.33763	0	45	1	1	80	1	sub-10	0.189714	FALSE	-0.356053	-2.7009	1.86083	0	0	1	0.416667	1.26303	1.73815	0.00809624
1009	1	1	10	10	(188.06241686014528, 'Miss', 'Miss')	312	190.663	1	191.663	195.13	left	0.471437	45	315	1	1	80	1	sub-10	0.137143	FALSE	3.27427	1.81288	-2.41798	0	0	2	0.307692	1.70044	1.7274	0.00531093
1010	1	1	11	11	(198.13115255731645, 'Miss', 'Miss')	348	201.031	1	202.032	205.249	left	0.221098	45	315	1	1	80	1	sub-10	0.109143	FALSE	0.238066	-1.28124	-0.0225972	0	0	2	0.357143	1.48543	1.70559	0.0275341
1011	1	1	12	12	(208.2498907651543, 'Miss', 'Miss')	396	211.55	1	212.55	215.718	left	0.171628	45	315	1	1	80	1	sub-10	0.0245714	FALSE	-4.54038	-1.60229	3.72176	0	0	2	0.4	1.32193	1.67742	0.0197292
1012	1	1	13	13	(218.71874725178986, 'Miss', 'Miss')	300	221.219	1	222.219	225.336	right	0.120362	0	45	1	1	80	1	sub-10	0.210857	FALSE	1.04162	5.91656	-6.63525	0	0	1	0.375	1.41504	1.65788	0.00257445
1013	1	1	14	14	(228.33740153952476, 'Miss', 'Miss')	312	230.938	1	231.938	235.088	right	0.154192	0	315	0	1	20	0	sub-10	0.319429	FALSE	-0.506224	-0.505297	-3.16486	0	0	0	0.0588235	4.08746	1.7642	0.0276721
1014	1	1	15	15	(238.08939724281572, 'Miss', 'Miss')	408	241.49	1	242.49	246.324	left	0.837309	45	315	1	1	80	1	sub-10	0.0971429	FALSE	-0.598963	-3.53174	2.03564	0	0	2	0.388889	1.36257	1.73995	0.0259122
1015	1	1	16	16	(249.32502963558636, 'Miss', 'Miss')	396	252.625	1	253.626	256.66	right	0.0380073	0	45	1	1	80	1	sub-10	0.221714	FALSE	4.01945	4.90762	-2.31065	0	0	1	0.368421	1.44057	1.72193	0.00211297
1016	1	1	17	17	(259.66049060940986, 'Miss', 'Miss')	360	262.661	0	263.661	267.528	right	0.870101	0	45	1	1	80	1	sub-10	0.289714	FALSE	0.0556658	-3.00274	-0.652812	0	0	1	0.4	1.32193	1.70044	0.0109973
1017	1	1	18	18	(270.5293985300532, 'Miss', 'Miss')	360	273.53	0	274.53	277.614	right	0.0865845	0	45	1	1	80	1	sub-10	0.0994286	FALSE	1.08379	-7.44905	0.886677	0	0	1	0.428571	1.22239	1.67674	0.00882743
1018	1	1	19	19	(280.61482919554055, 'Miss', 'Miss')	300	283.115	1	284.115	287.166	left	0.0536553	45	315	1	1	80	1	sub-10	0.208571	FALSE	-4.40181	-4.38455	-0.601466	0	0	2	0.363636	1.45943	1.66493	0.00133616
1019	1	1	20	20	(290.1667943269449, 'Miss', 'Miss')	324	292.867	0	293.867	358.239	left	61.3746	0	45	1	1	80	0	sub-10	0.0862857	FALSE	4.96358	1.02294	2.07477	1	1	1	0.434783	1.20163	1.644	0.00121344
1020	1	1	21	21	(361.2399193923129, 'Miss', 'Miss')	372	364.34	0	365.34	368.508	left	0.169971	45	315	1	1	80	1	sub-10	0.108571	FALSE	-2.56328	-8.58991	2.6049	0	0	2	0.375	1.41504	1.63294	0.00100855
1021	1	1	22	22	(371.5085386277997, 'Miss', 'Miss')	300	374.009	0	375.009	388.862	right	10.8561	0	45	1	1	80	1	sub-10	0	FALSE	-5.35028	-6.48652	8.1553	0	0	1	0.44	1.18442	1.61433	0.000922841
1022	1	1	23	23	(391.86290257028577, 'Miss', 'Miss')	360	394.863	1	395.863	399.731	right	0.870189	0	45	1	1	80	1	sub-10	0.216	FALSE	-4.61295	1.14221	4.44008	0	0	1	0.461538	1.11548	1.5947	0.00500962
1023	1	1	24	24	(402.7316204569752, 'Miss', 'Miss')	300	405.232	0	406.232	425.844	left	16.6149	45	315	1	1	80	1	sub-10	0.110857	FALSE	-4.12528	-5.5635	4.402	1	1	2	0.37037	1.43296	1.58737	0.00071846
1024	1	1	25	25	(428.84560060300373, 'Miss', 'Miss')	336	431.646	0	432.646	435.746	left	0.104569	45	315	1	1	80	1	sub-10	0.183429	FALSE	-4.67072	-4.65869	9.2232	0	0	2	0.392857	1.34792	1.5778	0.00574833
1025	1	1	26	26	(438.7473935525495, 'Miss', 'Miss')	336	441.548	0	442.548	445.682	left	0.137984	45	45	0	1	20	0	sub-10	0.116	FALSE	1.49218	-0.199122	-1.47124	0	0	3	0.0689655	3.85798	1.64422	0.00917293
1026	1	1	27	27	(448.68279948588224, 'Miss', 'Miss')	324	451.383	0	452.383	469.162	right	13.7823	0	45	1	1	80	1	sub-10	0.111429	FALSE	-0.224036	-3.68681	-1.70008	1	1	1	0.433333	1.20645	1.62912	0.00867824
1027	1	1	28	28	(472.16277060072116, 'Miss', 'Miss')	360	475.163	1	476.163	479.214	left	0.0547159	45	315	1	1	80	1	sub-10	0.366857	FALSE	0.863757	-3.78395	-0.24274	0	0	2	0.387097	1.36923	1.61989	0.000578617
1028	1	1	29	29	(482.2145746887536, 'Miss', 'Miss')	348	485.115	0	486.115	494.95	right	5.83777	0	45	1	1	80	1	sub-10	0.101714	FALSE	-4.94545	-1.32831	6.99412	0	0	1	0.4375	1.19265	1.60609	0.000536704
1029	1	1	30	30	(497.95121342921357, 'Miss', 'Miss')	312	500.551	0	501.552	505.569	left	1.02167	45	315	1	1	80	1	sub-10	0.102857	FALSE	-2.50318	2.015	-0.593945	0	0	2	0.393939	1.34395	1.59743	0.000473863
1030	1	1	31	31	(508.56998340185146, 'Miss', 'Miss')	396	511.87	1	512.871	516.621	left	0.754069	45	315	1	1	80	1	sub-10	0	FALSE	-5.97529	-3.58177	0.0877626	0	0	2	0.411765	1.28011	1.58752	0.00359005
1031	1	1	32	32	(519.6223392819056, 'Miss', 'Miss')	300	522.123	0	523.123	526.657	right	0.538322	0	315	0	1	20	0	sub-10	0.104571	FALSE	5.32112	0.878076	-8.67944	0	0	0	0.0571429	4.12928	1.65002	0.00775791
1032	1	1	33	33	(529.6577410816508, 'Miss', 'Miss')	336	532.458	1	533.458	543.96	right	7.50594	0	45	1	1	80	1	sub-10	0.416	TRUE	0.136135	5.57718	-4.6245	0	0	1	0.416667	1.26303	1.63883	0.00752257
1033	1	1	34	34	(546.9614555657618, 'Miss', 'Miss')	312	549.562	1	550.562	553.946	right	0.387784	0	315	0	1	20	0	sub-10	0.164571	FALSE	-6.24852	-8.70783	6.68779	0	0	0	0.0810811	3.62449	1.68587	0.00488961
1034	1	1	35	35	(556.946689234007, 'Miss', 'Miss')	396	560.247	0	561.247	564.815	right	0.570647	0	45	1	1	80	1	sub-10	0	FALSE	-4.52889	-8.21328	8.2637	0	0	1	0.421053	1.24793	1.67399	0.00474392
1035	1	1	36	36	(567.8155766254358, 'Miss', 'Miss')	360	570.816	0	571.816	575.684	left	0.8702	45	45	0	1	20	0	sub-10	0.165143	FALSE	-2.02764	-5.07955	4.10733	0	0	3	0.0769231	3.70044	1.71967	0.00467488
1036	1	1	37	37	(578.6844493135059, 'Miss', 'Miss')	360	581.685	1	582.685	586.236	left	0.554672	45	45	0	1	20	0	sub-10	0	FALSE	1.2839	-2.94106	1.49429	0	0	3	0.1	3.32193	1.75512	0.0177241
1037	1	1	38	38	(589.2366674536197, 'Miss', 'Miss')	372	592.337	1	593.337	596.921	right	0.586838	0	45	1	1	80	1	sub-10	0.109143	FALSE	-3.06812	-2.45688	-0.516464	0	0	1	0.414634	1.27009	1.74299	0.00327637
1038	1	1	39	39	(599.9221504408642, 'Miss', 'Miss')	312	602.522	0	603.523	607.19	left	0.670846	45	315	1	1	80	1	sub-10	0.1	FALSE	2.15592	1.44359	-3.88544	0	0	2	0.357143	1.48543	1.7363	0.000451653
1039	1	1	40	40	(610.1909663684282, 'Miss', 'Miss')	360	613.191	1	614.191	617.709	right	0.52138	0	45	1	1	80	1	sub-10	0.206286	FALSE	-2.71246	-2.72091	4.133	0	0	1	0.418605	1.25634	1.72488	0.000426672
1040	1	1	41	41	(620.7097521263686, 'Miss', 'Miss')	408	624.11	1	625.11	628.728	right	0.619836	0	45	1	1	80	1	sub-10	0	FALSE	-3.68738	-3.78307	3.06368	0	0	1	0.431818	1.2115	1.713	0.00196859
1041	1	1	42	42	(631.7286825597939, 'Miss', 'Miss')	324	634.429	0	635.429	639.58	right	1.15445	0	45	1	1	80	1	sub-10	0	FALSE	-5.60877	-6.84486	3.44569	0	0	1	0.444444	1.16993	1.70077	0.0017868
1042	1	1	43	43	(642.5809232543024, 'Miss', 'Miss')	348	645.481	1	646.481	649.899	left	0.421543	45	315	1	1	80	1	sub-10	0	FALSE	0.326481	1.4876	1.14682	0	0	2	0.347826	1.52356	1.69639	0.000350291
1043	1	1	44	44	(652.8997000792597, 'Miss', 'Miss')	384	656.1	1	657.1	660.601	left	0.503082	45	315	1	1	80	1	sub-10	0.225714	FALSE	1.27017	1.80827	-4.6143	0	0	2	0.361702	1.46713	1.69107	0.00232133
1044	1	1	45	45	(663.6018735960724, 'Miss', 'Miss')	324	666.302	1	667.302	670.67	right	0.371365	0	45	1	1	80	1	sub-10	0.0394286	FALSE	-1.72676	-0.895015	4.83303	0	0	1	0.4375	1.19265	1.68051	0.000304134
1045	1	1	46	46	(673.6706287127718, 'Miss', 'Miss')	348	676.571	0	677.571	681.155	left	0.587028	45	45	0	1	20	0	sub-10	0	FALSE	5.47115	10.0527	-9.48751	0	0	3	0.102041	3.29278	1.71034	0.00220069
1046	1	1	47	47	(684.1561379996047, 'Miss', 'Miss')	312	686.756	1	687.757	690.924	right	0.170007	0	45	1	1	80	1	sub-10	0.104	FALSE	-2.97306	-1.02365	2.38087	0	0	1	0.44	1.18442	1.69967	0.00215125
1047	1	1	48	48	(693.9247737416908, 'Miss', 'Miss')	384	697.125	1	698.125	701.493	left	0.37166	45	315	1	1	80	1	sub-10	0.253143	FALSE	-6.07469	-8.02322	4.90105	0	0	2	0.352941	1.5025	1.6954	0.000282731
1048	1	1	49	49	(704.4936177720856, 'Miss', 'Miss')	312	707.094	0	708.094	711.561	right	0.470307	0	45	1	1	80	1	sub-10	0.0994286	FALSE	-4.39508	-6.2103	0.662066	0	0	1	0.442308	1.17688	1.68529	0.000272072
1049	1	1	50	50	(714.5623351594159, 'Miss', 'Miss')	348	717.463	0	718.463	722.247	right	0.787915	0	315	0	1	20	0	sub-10	0.105143	FALSE	-3.57718	-10.1835	5.7932	0	0	0	0.0754717	3.72792	1.72027	0.0026495
1050	1	1	51	51	(725.2478836182136, 'Miss', 'Miss')	312	727.848	1	728.848	732.349	right	0.50393	0	45	1	1	80	1	sub-10	0.107429	FALSE	-2.91657	3.50755	-1.70218	0	0	1	0.444444	1.16993	1.70997	0.00259679
1051	1	1	52	52	(735.349965141947, 'Miss', 'Miss')	360	738.35	0	739.35	742.668	left	0.321091	45	315	1	1	80	1	sub-10	0.105143	FALSE	1.43815	8.40029	-5.55383	0	0	2	0.345455	1.53343	1.70638	0.000253185
1052	1	1	53	53	(745.6687192183135, 'Miss', 'Miss')	348	748.569	0	749.569	753.17	left	0.604732	0	45	1	1	80	0	sub-10	0.111429	FALSE	-2.17623	4.71938	1.75803	0	0	1	0.446429	1.1635	1.69658	0.000244846
1053	1	1	54	54	(756.1709098797955, 'Miss', 'Miss')	336	758.971	1	759.971	763.372	right	0.405018	0	45	1	1	80	1	sub-10	0.112	FALSE	2.5635	-1.20582	3.1221	0	0	1	0.45614	1.13245	1.6866	0.00106092
1054	1	1	55	55	(766.3729675729946, 'Miss', 'Miss')	348	769.273	1	770.273	773.791	right	0.521329	0	315	0	1	20	0	sub-10	0.105143	FALSE	-4.21292	2.43345	-4.39106	0	0	0	0.0862069	3.53605	1.71586	0.00191301
1055	1	1	56	56	(776.7918054584961, 'Miss', 'Miss')	408	780.192	1	781.192	784.443	left	0.254756	45	315	1	1	80	1	sub-10	0.122286	FALSE	-1.09365	-8.30204	5.44775	0	0	2	0.338983	1.56071	1.71289	0.0020301
1056	1	1	57	57	(787.443957877379, 'Miss', 'Miss')	384	790.644	0	791.644	794.895	left	0.252997	45	45	0	1	20	0	sub-10	0.116	FALSE	-0.961419	0.132087	3.2558	0	0	3	0.1	3.32193	1.73759	0.00165855
1057	1	1	58	58	(797.8960894341408, 'Miss', 'Miss')	408	801.296	0	802.297	805.797	right	0.503201	0	315	0	1	20	0	sub-10	0.110286	FALSE	-1.54789	-3.85301	4.02579	0	0	0	0.0983607	3.34577	1.76188	0.00291193
1058	1	1	59	59	(808.7983295876757, 'Miss', 'Miss')	336	811.599	1	812.599	815.816	left	0.220507	45	315	1	1	80	1	sub-10	0	FALSE	-4.4791	-4.59443	5.35327	0	0	2	0.33871	1.56188	1.75835	0.00160439
1059	1	1	60	60	(818.8170633290238, 'Miss', 'Miss')	384	822.017	1	823.018	826.285	right	0.270104	0	45	1	1	80	1	sub-10	0.088	FALSE	-5.6469	-2.75699	2.9022	0	0	1	0.428571	1.22239	1.74974	0.000221311
1060	1	1	61	61	(829.2859034477706, 'Miss', 'Miss')	396	832.586	1	833.586	837.212	left	0.629642	45	315	1	1	80	1	sub-10	0.110286	FALSE	-2.40752	-0.574545	3.63356	0	0	2	0.34375	1.54057	1.7462	0.000205734
1061	1	1	62	62	(840.213116837037, 'Miss', 'Miss')	360	843.213	0	844.214	847.564	left	0.354887	45	315	1	1	80	1	sub-10	0.105714	FALSE	4.29082	3.97514	-0.789337	0	0	2	0.353846	1.49881	1.74215	0.00125347
1062	1	1	63	63	(850.5652397659787, 'Miss', 'Miss')	324	853.266	0	854.266	857.733	right	0.471198	45	315	1	1	80	0	sub-10	0.116	FALSE	-2.44241	-9.81051	6.28591	0	0	2	0.363636	1.45943	1.73765	0.00116453
1063	1	1	64	64	(860.7339746586249, 'Miss', 'Miss')	336	863.534	0	864.534	868.085	right	0.553812	45	315	1	1	80	0	sub-10	0.234286	FALSE	-1.62636	-2.41031	0.618447	0	0	2	0.373134	1.42223	1.73275	0.00108433
1064	1	1	65	65	(871.0861145102999, 'Miss', 'Miss')	408	874.486	0	875.487	878.937	left	0.455009	45	315	1	1	80	1	sub-10	0.0971429	FALSE	0.487392	0.876228	1.17835	0	0	2	0.382353	1.38702	1.7275	0.00101177
1065	1	1	66	66	(881.9383568693383, 'Miss', 'Miss')	408	885.339	1	886.339	889.573	left	0.237124	45	315	1	1	80	1	sub-10	0	FALSE	-2.05077	-0.653613	4.9182	0	0	2	0.391304	1.35364	1.72193	0.000945906
1066	1	1	67	67	(892.5738659203644, 'Miss', 'Miss')	348	895.474	0	896.474	899.892	left	0.42009	45	315	1	1	80	1	sub-10	0	FALSE	-2.63727	-9.22818	4.41346	0	0	2	0.4	1.32193	1.71608	0.000885947
1067	1	1	68	68	(902.8925864286912, 'Miss', 'Miss')	300	905.393	0	906.393	909.76	right	0.369784	0	45	1	1	80	1	sub-10	0.108	FALSE	-3.30163	-10.9013	4.24563	0	0	1	0.394366	1.34239	1.71068	0.00014013
1068	1	1	69	69	(912.761348702873, 'Miss', 'Miss')	348	915.662	0	916.662	920.012	left	0.354438	0	315	0	1	20	1	sub-10	0.106286	FALSE	8.86024	1.87187	-3.59995	0	0	0	0.0972222	3.36257	1.73209	0.00114608
1069	1	1	70	70	(923.0134458038419, 'Miss', 'Miss')	384	926.214	1	927.214	930.448	left	0.23667	45	45	0	1	20	0	sub-10	0.224571	FALSE	3.87507	1.3791	1.46241	0	0	3	0.0958904	3.38247	1.7532	0.00212463
1070	1	1	71	71	(933.4488565920556, 'Miss', 'Miss')	312	936.049	1	937.049	940.333	right	0.287764	0	45	1	1	80	1	sub-10	0	FALSE	-7.56697	-8.9344	8.44604	0	0	1	0.391892	1.35147	1.74764	0.00111852
1071	1	1	72	72	(943.3342622340942, 'Miss', 'Miss')	300	945.834	1	946.835	950.085	left	0.253854	45	315	1	1	80	1	sub-10	0.115429	FALSE	-0.228396	-3.45465	1.48509	0	0	2	0.386667	1.37084	1.74249	0.000138695
1072	1	1	73	73	(953.0862190983289, 'Miss', 'Miss')	312	955.686	1	956.687	959.954	left	0.271233	45	315	1	1	80	1	sub-10	0.117143	FALSE	-0.555612	5.26953	-3.1404	0	0	2	0.394737	1.34104	1.73709	0.000768186
1073	1	1	74	74	(962.9549525206412, 'Miss', 'Miss')	312	965.555	0	966.555	969.906	right	0.355002	0	45	1	1	80	1	sub-10	0.230857	FALSE	-2.49841	1.4616	3.30024	0	0	1	0.38961	1.3599	1.73207	0.000127273
1074	1	1	75	75	(972.9069682537875, 'Miss', 'Miss')	372	976.007	1	977.007	980.475	right	0.471246	0	45	1	1	80	1	sub-10	0	FALSE	-5.66781	-2.55798	0.144891	0	0	1	0.397436	1.33121	1.72682	0.000720994
1075	1	1	76	76	(983.4758430780066, 'Miss', 'Miss')	312	986.076	0	987.076	990.46	left	0.3869	45	315	1	1	80	1	sub-10	0.122857	FALSE	-4.55784	-3.62054	6.2792	0	0	2	0.392405	1.34958	1.72193	0.000117076
1076	1	1	77	77	(993.4612135152156, 'Miss', 'Miss')	372	996.561	0	997.562	1000.9	left	0.336815	45	315	1	1	80	1	sub-10	0.222286	FALSE	-0.835446	-1.27182	0.826726	0	0	2	0.4	1.32193	1.71683	0.000678001
1077	1	1	78	78	(1003.8966265228037, 'Miss', 'Miss')	300	1006.4	1	1007.4	1010.91	right	0.519922	0	315	0	1	20	0	sub-10	0.0708571	FALSE	11.155	14.7226	-7.53577	0	0	0	0.0987654	3.33985	1.73567	0.000892321
1078	1	1	79	79	(1013.9153780191473, 'Miss', 'Miss')	360	1016.92	0	1017.92	1021.45	left	0.537484	45	315	1	1	80	1	sub-10	0	FALSE	2.06037	-0.241709	-1.42904	0	0	2	0.402439	1.31316	1.73042	0.000878783
1079	1	1	80	80	(1024.4508917586018, 'Miss', 'Miss')	336	1027.25	0	1028.25	1031.64	left	0.386456	45	315	1	1	80	1	sub-10	0	FALSE	-9.79908	-8.19475	1.43134	0	0	2	0.409639	1.28758	1.72501	0.000604956
1080	1	1	81	81	(1034.6362664126218, 'Miss', 'Miss')	336	1037.44	0	1038.44	1042.15	left	0.720417	45	315	1	1	80	1	sub-10	0.3	FALSE	0.0448453	12.9547	-11.0987	0	0	2	0.416667	1.26303	1.71943	0.000573645
1081	1	1	82	82	(1045.155112648522, 'Miss', 'Miss')	300	1047.66	1	1048.66	1051.94	left	0.288107	45	315	1	1	80	1	sub-10	0.110857	FALSE	-2.63576	-1.5142	-1.213	0	0	2	0.423529	1.23947	1.71372	0.000544562
1082	1	1	83	83	(1054.9404275458792, 'Miss', 'Miss')	372	1058.04	0	1059.04	1062.79	left	0.753982	0	45	1	1	80	0	sub-10	0.238857	FALSE	-1.26891	-0.576647	2.14152	0	0	1	0.372093	1.42626	1.71025	9.75025e-05
1083	1	1	84	84	(1065.7926912663997, 'Miss', 'Miss')	396	1069.09	0	1070.09	1073.38	right	0.288148	0	45	1	1	80	1	sub-10	0	FALSE	-7.1776	-6.99561	6.85556	0	0	1	0.37931	1.39855	1.70656	0.000625597
1084	1	1	85	85	(1076.378183103402, 'Miss', 'Miss')	372	1079.48	0	1080.48	1083.9	left	0.420035	45	315	1	1	80	1	sub-10	0.109143	FALSE	0.0259612	-4.60289	2.43967	0	0	2	0.420455	1.24998	1.7013	9.04487e-05
1085	1	1	86	86	(1086.8969694161851, 'Miss', 'Miss')	312	1089.5	0	1090.5	1093.85	left	0.35372	45	315	1	1	80	1	sub-10	0	FALSE	-11.5974	-11.5693	-2.03916	0	0	2	0.426966	1.22781	1.69592	0.000489692
1086	1	1	87	87	(1096.8490328658872, 'Miss', 'Miss')	360	1099.85	0	1100.85	1104.6	right	0.754041	0	45	1	1	80	1	sub-10	0	FALSE	-1.61802	1.20522	1.36774	0	0	1	0.377778	1.40439	1.69258	8.40618e-05
1087	1	1	88	88	(1107.6012277580512, 'Miss', 'Miss')	360	1110.6	0	1111.6	1115.1	right	0.504186	0	45	1	1	80	1	sub-10	0.028	FALSE	-2.642	-7.4212	4.05819	0	0	1	0.384615	1.37851	1.68903	0.000558942
1088	1	1	89	89	(1118.1033895676637, 'Miss', 'Miss')	408	1121.5	0	1122.5	1125.84	left	0.336322	45	45	0	1	20	0	sub-10	0.212	FALSE	-2.29176	-1.13656	-1.67788	0	0	3	0.0869565	3.52356	1.7079	0.000812565
1089	1	1	90	90	(1128.838933879003, 'Miss', 'Miss')	384	1132.04	1	1133.04	1136.36	right	0.321245	0	45	1	1	80	1	sub-10	0.102286	FALSE	-1.73071	-4.16736	-0.29663	0	0	1	0.387097	1.36923	1.70417	0.000801556
1090	1	1	91	91	(1139.3577310112387, 'Miss', 'Miss')	348	1142.26	1	1143.26	1146.63	right	0.369843	0	45	1	1	80	1	sub-10	0.116571	FALSE	1.64111	1.10512	-1.65712	0	0	1	0.393617	1.34514	1.70027	0.000504208
1091	1	1	92	92	(1149.6264664864711, 'Miss', 'Miss')	396	1152.93	1	1153.93	1157.21	left	0.287377	45	45	0	1	20	0	sub-10	0.128	FALSE	-6.13582	-8.09165	3.96535	0	0	3	0.0947368	3.39993	1.71725	0.000689357
1092	1	1	93	93	(1160.211964149331, 'Miss', 'Miss')	372	1163.31	0	1164.31	1167.71	right	0.403306	0	315	0	1	20	0	sub-10	0.208	FALSE	-2.23623	-1.00456	2.37595	0	0	0	0.09375	3.41504	1.73403	0.00128361
1093	1	1	94	94	(1170.7140760230131, 'Miss', 'Miss')	408	1174.11	0	1175.11	1178.42	left	0.303539	45	315	1	1	80	1	sub-10	0	FALSE	-2.56602	-2.74861	0.713661	0	0	2	0.402062	1.31451	1.72964	0.000671697
1094	1	1	95	95	(1181.4162797788058, 'Miss', 'Miss')	324	1184.12	1	1185.12	1188.42	left	0.303866	45	45	0	1	20	0	sub-10	0.120571	FALSE	4.72475	4.34687	-4.30917	0	0	3	0.102041	3.29278	1.7448	0.000592321
1095	1	1	96	96	(1191.4183679329208, 'Miss', 'Miss')	360	1194.42	1	1195.42	1198.75	right	0.338146	0	315	0	1	20	0	sub-10	0	FALSE	-0.101569	4.02924	-2.32356	0	0	0	0.10101	3.30743	1.7598	0.00110443
1096	1	1	97	97	(1201.7538624747858, 'Miss', 'Miss')	384	1204.95	1	1205.95	1209.31	right	0.354043	45	315	1	1	80	0	sub-10	0.225143	FALSE	-2.47607	-2.382	3.01834	0	0	2	0.4	1.32193	1.75536	0.00058196
1097	1	1	98	98	(1212.3059665945284, 'Miss', 'Miss')	300	1214.81	0	1215.81	1219.34	right	0.53644	0	45	1	1	80	1	sub-10	0.118857	FALSE	1.05362	1.17464	-4.61155	0	0	1	0.376238	1.41028	1.75186	7.88263e-05
1098	1	1	99	99	(1222.3413980784107, 'Miss', 'Miss')	324	1225.04	0	1226.04	1229.39	right	0.353409	0	45	1	1	80	1	sub-10	0.361714	FALSE	-5.02385	9.03609	-0.762321	0	0	1	0.382353	1.38702	1.74821	0.000449045
1099	1	1	100	100	(1232.393463775229, 'Miss', 'Miss')	300	1234.89	1	1235.89	1239.21	right	0.320889	0	45	1	1	80	1	sub-10	0.123429	FALSE	2.01492	4.35972	-4.73402	0	0	1	0.38835	1.36457	1.74441	0.000429289
1100	1	2	101	1	(1382.8547963044084, 'Miss', 'Miss')	384	1386.06	1	1387.06	1390.23	right	0.169792	0	315	0	1	20	0	sub-10	0.109714	FALSE	-6.00403	-10.2251	9.00577	0	0	0	0.105769	3.24101	1.75813	0.000511685
1101	1	2	102	2	(1393.2263149031833, 'Miss', 'Miss')	408	1396.63	1	1397.63	1400.98	left	0.353261	45	315	1	1	80	1	sub-10	0.113143	FALSE	-2.56424	-4.20974	2.54281	0	0	2	0.390476	1.35669	1.75424	0.000505284
1102	1	2	103	3	(1403.9784787241033, 'Miss', 'Miss')	384	1407.18	0	1408.18	1411.66	left	0.48651	45	315	1	1	80	1	sub-10	0.414857	TRUE	-2.01517	0.127645	0.937216	0	0	2	0.396226	1.3356	1.75023	0.000392066
1103	1	2	104	4	(1414.664014144074, 'Miss', 'Miss')	324	1417.36	1	1418.36	1421.7	left	0.336526	45	315	1	1	80	1	sub-10	0.191429	FALSE	-4.07414	-3.73652	1.01577	0	0	2	0.401869	1.3152	1.74611	0.000375773
1104	1	2	105	5	(1424.6993882016386, 'Miss', 'Miss')	336	1427.5	0	1428.5	1431.9	right	0.403522	0	45	1	1	80	1	sub-10	0.225143	FALSE	1.66242	6.43206	-1.87264	0	0	1	0.37963	1.39734	1.74281	6.69697e-05
1105	1	2	106	6	(1434.9014877855325, 'Miss', 'Miss')	348	1437.8	1	1438.8	1442.09	left	0.286802	45	45	0	1	20	0	sub-10	0.172	FALSE	-2.20448	1.39956	-0.814442	0	0	3	0.100917	3.30875	1.75653	0.000496135
1106	1	2	107	7	(1445.0868976721258, 'Miss', 'Miss')	348	1447.99	1	1448.99	1452.25	left	0.269843	45	315	1	1	80	1	sub-10	0	FALSE	-1.11354	0.70163	-1.85689	0	0	2	0.4	1.32193	1.75253	0.000483207
1107	1	2	108	8	(1455.2556833329681, 'Miss', 'Miss')	300	1457.76	1	1458.76	1462.12	right	0.371597	0	45	1	1	80	1	sub-10	0.0931429	FALSE	-1.17167	1.71004	0.129491	0	0	1	0.378378	1.4021	1.7493	6.46287e-05
1108	1	2	109	9	(1465.1243349158403, 'Miss', 'Miss')	336	1467.92	0	1468.92	1472.34	left	0.420213	45	315	1	1	80	1	sub-10	0.12	FALSE	-3.9725	-4.23365	1.08308	0	0	2	0.401786	1.3155	1.74538	6.29466e-05
1109	1	2	110	10	(1475.343088964465, 'Miss', 'Miss')	324	1478.04	0	1479.04	1482.36	left	0.32091	45	315	1	1	80	1	sub-10	0.106857	FALSE	-3.90265	2.00346	-0.537238	0	0	2	0.40708	1.29662	1.74136	0.000329649
1110	1	2	111	11	(1485.3618038411269, 'Miss', 'Miss')	312	1487.96	1	1488.96	1492.25	left	0.286689	45	315	1	1	80	1	sub-10	0.102286	FALSE	-3.18298	-4.7447	0.539989	0	0	2	0.412281	1.2783	1.73726	0.000316965
1111	1	2	112	12	(1495.2471559407522, 'Miss', 'Miss')	360	1498.25	1	1499.25	1502.58	right	0.336623	0	45	1	1	80	1	sub-10	0	FALSE	-9.0288	-9.19467	6.439	0	0	1	0.373913	1.41923	1.73443	5.79601e-05
1112	1	2	113	13	(1505.5825977724699, 'Miss', 'Miss')	408	1508.98	0	1509.98	1513.43	right	0.45346	0	315	0	1	20	0	sub-10	0.114286	FALSE	-1.28231	3.31852	2.78353	0	0	0	0.103448	3.27302	1.74713	0.000429142
1113	1	2	114	14	(1516.4348007376093, 'Miss', 'Miss')	372	1519.54	1	1520.54	1523.9	right	0.369623	0	45	1	1	80	1	sub-10	0.173143	FALSE	-9.44121	-8.13367	6.25639	0	0	1	0.376068	1.41093	1.7442	0.000424135
1114	1	2	115	15	(1526.903582042928, 'Miss', 'Miss')	372	1530	1	1531	1534.29	left	0.288254	45	315	1	1	80	1	sub-10	0.108571	FALSE	-2.57232	-3.60932	-0.902861	0	0	2	0.40678	1.29768	1.74037	5.6085e-05
1115	1	2	116	16	(1537.2890469145286, 'Miss', 'Miss')	408	1540.69	1	1541.69	1545.01	right	0.321089	0	45	1	1	80	1	sub-10	0	FALSE	-0.513826	1.96527	-0.363837	0	0	1	0.378151	1.40296	1.73747	5.43485e-05
1116	1	2	117	17	(1548.0079151222371, 'Miss', 'Miss')	396	1551.31	1	1552.31	1555.64	right	0.337643	0	315	0	1	20	0	sub-10	0.122857	FALSE	-0.102758	3.98388	-5.00392	0	0	0	0.108333	3.20645	1.74922	0.000379488
1117	1	2	118	18	(1558.6434416508373, 'Miss', 'Miss')	336	1561.44	0	1562.44	1565.79	right	0.354656	0	315	0	1	20	0	sub-10	0.107429	FALSE	-2.2408	-5.16881	1.24255	0	0	0	0.115702	3.11151	1.76002	0.00153656
1118	1	2	119	19	(1568.7954962785252, 'Miss', 'Miss')	336	1571.6	1	1572.6	1575.91	right	0.319973	0	45	1	1	80	1	sub-10	0.225714	FALSE	-1.83058	-2.46138	4.46225	0	0	1	0.377049	1.40718	1.75707	0.000343034
1119	1	2	120	20	(1578.9142203378497, 'Miss', 'Miss')	360	1581.91	1	1582.91	1586.27	left	0.35364	45	45	0	1	20	0	sub-10	0.246857	FALSE	4.77344	3.66199	-4.57633	0	0	3	0.097561	3.35755	1.76955	0.000407704
1120	1	2	121	21	(1589.2664162287338, 'Miss', 'Miss')	312	1591.87	1	1592.87	1596.78	right	0.920945	0	45	1	1	80	1	sub-10	0	FALSE	-3.98801	-12.485	5.40633	0	0	1	0.379032	1.39961	1.76652	0.000403333
1121	1	2	122	22	(1599.7851878381598, 'Miss', 'Miss')	384	1602.99	1	1603.99	1607.57	right	0.586361	0	45	1	1	80	1	sub-10	0.116571	FALSE	0.171542	7.15309	-2.92023	0	0	1	0.384	1.38082	1.76339	0.000296773
1122	1	2	123	23	(1610.5707046986108, 'Miss', 'Miss')	396	1613.87	0	1614.87	1618.29	right	0.421216	0	315	0	1	20	0	sub-10	0	FALSE	-2.60924	-1.15251	1.15532	0	0	0	0.119048	3.07039	1.77335	0.000307238
1123	1	2	124	24	(1621.2896106356866, 'Miss', 'Miss')	384	1624.49	1	1625.49	1628.82	right	0.336728	0	45	1	1	80	1	sub-10	0.119429	FALSE	-1.9613	1.29519	-1.09901	0	0	1	0.385827	1.37397	1.77016	0.00030389
1124	1	2	125	25	(1631.8250733295254, 'Miss', 'Miss')	336	1634.63	0	1635.63	1639.03	right	0.404747	0	45	1	1	80	1	sub-10	0.334857	FALSE	-2.36806	-0.738508	-0.227927	0	0	1	0.390625	1.35614	1.76688	0.000275186
1125	1	2	126	26	(1642.0271723585765, 'Miss', 'Miss')	396	1645.33	1	1646.33	1649.68	right	0.353917	0	45	1	1	80	1	sub-10	0.221714	FALSE	-3.19586	-5.51908	2.82809	0	0	1	0.395349	1.3388	1.76353	0.000265598
1126	1	2	127	27	(1652.6793652810456, 'Miss', 'Miss')	360	1655.68	0	1656.68	1660	left	0.320253	45	315	1	1	80	1	sub-10	0.123429	FALSE	-1.12337	-0.947406	2.67577	0	0	2	0.376923	1.40766	1.76074	4.90237e-05
1127	1	2	128	28	(1662.9981140863993, 'Miss', 'Miss')	348	1665.9	1	1666.9	1670.23	left	0.336859	45	315	1	1	80	1	sub-10	0	FALSE	-5.04911	-10.0975	3.89463	0	0	2	0.381679	1.38957	1.75786	0.000272863
1128	1	2	129	29	(1673.2335755873237, 'Miss', 'Miss')	300	1675.73	1	1676.73	1680.07	left	0.337934	45	45	0	1	20	0	sub-10	0	FALSE	-6.6841	-10.3761	2.36861	0	0	3	0.0984848	3.34395	1.76942	0.000349886
1129	1	2	130	30	(1683.0688846726944, 'Miss', 'Miss')	348	1685.97	0	1686.97	1690.25	left	0.286907	45	315	1	1	80	1	sub-10	0.118286	FALSE	-9.20995	-10.0685	4.90385	0	0	2	0.383459	1.38286	1.76647	0.000346425
1130	1	2	131	31	(1693.2542931721773, 'Miss', 'Miss')	336	1696.05	1	1697.05	1700.44	left	0.386967	45	315	1	1	80	1	sub-10	0	FALSE	0.259195	4.14288	-0.16372	0	0	2	0.38806	1.36565	1.76344	0.000253809
1131	1	2	132	32	(1703.439683084399, 'Miss', 'Miss')	408	1706.84	0	1707.84	1711.29	right	0.454779	0	45	1	1	80	1	sub-10	0.106286	FALSE	-6.16322	-0.0267428	1.93214	0	0	1	0.385185	1.37638	1.76053	4.51585e-05
1132	1	2	133	33	(1714.291957346949, 'Miss', 'Miss')	384	1717.49	0	1718.49	1721.93	left	0.43797	45	315	1	1	80	1	sub-10	0	FALSE	-7.67784	0.0557594	1.16587	0	0	2	0.389706	1.35954	1.75755	4.40951e-05
1133	1	2	134	34	(1724.9274533591479, 'Miss', 'Miss')	348	1727.83	0	1728.83	1732.36	right	0.536933	0	45	1	1	80	1	sub-10	0.117714	FALSE	-7.35283	-1.20119	2.61148	0	0	1	0.386861	1.37011	1.75468	4.30304e-05
1134	1	2	135	35	(1735.36294265774, 'Miss', 'Miss')	360	1738.36	1	1739.36	1742.71	left	0.353731	45	315	1	1	80	1	sub-10	0.226857	FALSE	-4.08258	-0.288679	3.66314	0	0	2	0.391304	1.35364	1.75173	4.20332e-05
1135	1	2	136	36	(1745.7150775158216, 'Miss', 'Miss')	372	1748.82	0	1749.82	1753.55	left	0.737028	45	315	1	1	80	1	sub-10	0	FALSE	-2.75111	-3.96313	1.05514	0	0	2	0.395683	1.33758	1.74872	0.000228408
1136	1	2	137	37	(1756.5506215774813, 'Miss', 'Miss')	372	1759.65	1	1760.65	1763.92	left	0.269874	45	315	1	1	80	1	sub-10	0	FALSE	-3.60611	-11.6692	7.44796	0	0	2	0.4	1.32193	1.74564	0.000221118
1137	1	2	138	38	(1766.9194186681025, 'Miss', 'Miss')	384	1770.12	0	1771.12	1774.47	left	0.354464	45	315	1	1	80	1	sub-10	0.116	FALSE	-11.3788	-10.769	5.00967	0	0	2	0.404255	1.30666	1.7425	0.000214153
1138	1	2	139	39	(1777.4715921433026, 'Miss', 'Miss')	384	1780.67	1	1781.67	1784.92	left	0.253731	45	315	1	1	80	1	sub-10	0	FALSE	-1.16009	0.301803	3.68641	0	0	2	0.408451	1.29177	1.73929	0.000207492
1139	1	2	140	40	(1787.923747280919, 'Miss', 'Miss')	300	1790.42	0	1791.42	1794.71	right	0.287134	0	45	1	1	80	1	sub-10	0	FALSE	-8.84287	-7.63853	3.67983	0	0	1	0.377622	1.40498	1.73691	3.76238e-05
1140	1	2	141	41	(1797.7090485846084, 'Miss', 'Miss')	348	1800.61	0	1801.61	1804.91	right	0.303104	0	45	1	1	80	1	sub-10	0	FALSE	4.75125	-5.70626	-3.7371	0	0	1	0.381944	1.38857	1.73446	0.000225526
1141	1	2	142	42	(1807.9111484459254, 'Miss', 'Miss')	336	1810.71	1	1811.71	1815.03	left	0.320439	45	315	1	1	80	1	sub-10	0.12	FALSE	-2.39095	2.13913	1.91345	0	0	2	0.406897	1.29727	1.73141	3.59525e-05
1142	1	2	143	43	(1818.02990579587, 'Miss', 'Miss')	408	1821.43	1	1822.43	1825.78	right	0.353961	0	45	1	1	80	1	sub-10	0.0948571	FALSE	-5.1518	5.76843	2.54358	0	0	1	0.383562	1.38247	1.72898	3.50651e-05
1143	1	2	144	44	(1828.7820882040514, 'Miss', 'Miss')	300	1831.28	1	1832.28	1835.58	right	0.303346	0	45	1	1	80	1	sub-10	0	FALSE	-2.54991	0.533546	-1.33255	0	0	1	0.387755	1.36678	1.72649	0.000211141
1144	1	2	145	45	(1838.5841127730828, 'Miss', 'Miss')	384	1841.78	1	1842.78	1846.19	right	0.404583	0	45	1	1	80	1	sub-10	0.110286	FALSE	-3.48495	-3.73839	-0.993162	0	0	1	0.391892	1.35147	1.72392	0.000204691
1145	1	2	146	46	(1849.1862490876292, 'Miss', 'Miss')	336	1851.99	0	1852.99	1856.34	left	0.354934	45	315	1	1	80	1	sub-10	0.200571	FALSE	-2.5124	2.30784	-2.10913	0	0	2	0.402685	1.31228	1.72113	3.27582e-05
1146	1	2	147	47	(1859.3383339542952, 'Miss', 'Miss')	408	1862.74	0	1863.74	1867.16	left	0.421131	45	315	1	1	80	1	sub-10	0.0862857	FALSE	0.997297	4.80486	2.79103	0	0	2	0.406667	1.29808	1.71828	0.00018732
1147	1	2	148	48	(1870.1572196673214, 'Miss', 'Miss')	348	1873.06	0	1874.06	1877.39	right	0.336775	0	45	1	1	80	1	sub-10	0.110286	FALSE	3.27035	8.69579	-4.83346	0	0	1	0.390728	1.35576	1.71584	3.13684e-05
1148	1	2	149	49	(1880.3926623035613, 'Miss', 'Miss')	408	1883.79	0	1884.79	1888.04	right	0.253543	0	45	1	1	80	1	sub-10	0.0982857	FALSE	1.1637	12.0954	-8.30263	0	0	1	0.394737	1.34104	1.71335	0.000191744
1149	1	2	150	50	(1891.0448652132172, 'Miss', 'Miss')	372	1894.15	0	1895.15	1898.41	left	0.269814	45	315	1	1	80	1	sub-10	0.110286	FALSE	-1.95967	-8.53708	-2.43268	0	0	2	0.405229	1.30319	1.71064	3.00564e-05
1150	1	2	151	51	(1901.4135987742402, 'Miss', 'Miss')	348	1904.31	1	1905.31	1908.56	right	0.253512	0	45	1	1	80	1	sub-10	0.112	FALSE	0.268478	1.15781	2.33799	0	0	1	0.396104	1.33605	1.70818	2.93983e-05
1151	1	2	152	52	(1911.5656891893423, 'Miss', 'Miss')	384	1914.77	0	1915.77	1919.02	left	0.25473	45	45	0	1	20	0	sub-10	0.105714	FALSE	0.871276	1.1755	0.875705	0	0	3	0.0903226	3.46877	1.71917	0.000278498
1152	1	2	153	53	(1922.0178213009467, 'Miss', 'Miss')	336	1924.82	1	1925.82	1929.07	left	0.254094	45	45	0	1	20	0	sub-10	0.109143	FALSE	-2.80064	0.523191	-2.41513	0	0	3	0.0961538	3.37851	1.72947	0.00113628
1153	1	2	154	54	(1932.06992389487, 'Miss', 'Miss')	336	1934.87	1	1935.87	1939.17	left	0.304487	45	315	1	1	80	1	sub-10	0.101143	FALSE	-5.04545	-0.50756	2.60844	0	0	2	0.401274	1.31734	1.72682	0.00025334
1154	1	2	155	55	(1942.1719940443081, 'Miss', 'Miss')	360	1945.17	1	1946.17	1949.47	left	0.304821	45	315	1	1	80	1	sub-10	0.113714	FALSE	-3.73828	3.91639	-0.845138	0	0	2	0.405063	1.30378	1.72412	0.00016995
1155	1	2	156	56	(1952.4740415006409, 'Miss', 'Miss')	360	1955.47	1	1956.47	1959.74	right	0.271082	0	45	1	1	80	1	sub-10	0	FALSE	-2.15699	-2.29942	4.7252	0	0	1	0.389937	1.35869	1.72179	2.875e-05
1156	1	2	157	57	(1962.7428221956334, 'Miss', 'Miss')	396	1966.04	1	1967.04	1970.39	right	0.353611	0	45	1	1	80	1	sub-10	0.185714	FALSE	1.91962	4.50211	-0.414888	0	0	1	0.39375	1.34465	1.7194	0.000173755
1157	1	2	158	58	(1973.3950511829398, 'Miss', 'Miss')	372	1976.5	0	1977.5	1980.86	left	0.369861	45	315	1	1	80	1	sub-10	0.221143	FALSE	-1.34529	2.17717	2.92364	0	0	2	0.403727	1.30855	1.71683	2.76051e-05
1158	1	2	159	59	(1983.8638288817756, 'Miss', 'Miss')	336	1986.66	0	1987.66	1990.96	right	0.303516	0	45	1	1	80	1	sub-10	0.218286	FALSE	-0.185473	-2.55905	-3.25136	0	0	1	0.395062	1.33985	1.71447	2.7031e-05
1159	1	2	160	60	(1993.965923444336, 'Miss', 'Miss')	372	1997.07	1	1998.07	2001.32	left	0.253734	45	315	1	1	80	1	sub-10	0.225714	FALSE	-1.56794	0.782936	-2.69594	0	0	2	0.404908	1.30433	1.71193	2.65203e-05
1160	1	2	161	61	(2004.3180513668713, 'Miss', 'Miss')	384	2007.52	0	2008.52	2011.8	left	0.288	45	315	1	1	80	1	sub-10	0.113714	FALSE	0.306846	-2.69416	0.670977	0	0	2	0.408537	1.29146	1.70934	0.000155474
1161	1	2	162	62	(2014.8035592665974, 'Miss', 'Miss')	396	2018.1	1	2019.1	2022.32	left	0.220924	45	315	1	1	80	1	sub-10	0.101714	FALSE	-5.7282	0.0333977	1.4403	0	0	2	0.412121	1.27886	1.70671	0.000151329
1162	1	2	163	63	(2025.3223622246906, 'Miss', 'Miss')	300	2027.82	0	2028.82	2032.11	right	0.286693	0	45	1	1	80	1	sub-10	0.110286	FALSE	-1.60806	2.52671	-5.7581	0	0	1	0.391566	1.35267	1.70455	2.50337e-05
1163	1	2	164	64	(2035.1076934899365, 'Miss', 'Miss')	408	2038.51	0	2039.51	2042.94	right	0.436577	0	315	0	1	20	0	sub-10	0.102857	FALSE	0.542836	3.16003	4.91558	0	0	0	0.0958084	3.3837	1.71431	0.000225607
1164	1	2	165	65	(2045.9432020416034, 'Miss', 'Miss')	384	2049.14	0	2050.14	2053.44	right	0.30347	0	45	1	1	80	1	sub-10	0.12	FALSE	4.90687	6.21403	-8.73791	0	0	1	0.392857	1.34792	1.7121	0.000223898
1165	1	2	166	66	(2056.4453588576207, 'Miss', 'Miss')	384	2059.65	1	2060.65	2064.01	right	0.369672	0	45	1	1	80	1	sub-10	0	FALSE	-1.40154	-2.82433	-1.72835	0	0	1	0.39645	1.33479	1.70985	0.000153975
1166	1	2	167	67	(2067.0142775144895, 'Miss', 'Miss')	384	2070.21	0	2071.21	2074.5	left	0.288227	45	315	1	1	80	1	sub-10	0.448	TRUE	0.239862	-1.09633	4.48308	0	0	2	0.405882	1.30087	1.70742	2.40411e-05
1167	1	2	168	68	(2077.499723271724, 'Miss', 'Miss')	372	2080.6	0	2081.6	2084.92	left	0.320133	45	45	0	1	20	0	sub-10	0.223429	FALSE	1.17043	0.569275	1.79813	0	0	3	0.0935673	3.41785	1.71713	0.000219016
1168	1	2	169	69	(2087.918537576371, 'Miss', 'Miss')	372	2091.02	1	2092.02	2095.27	right	0.254693	0	315	0	1	20	0	sub-10	0.114286	FALSE	-3.45796	-1.20032	2.95979	0	0	0	0.0988372	3.3388	1.72629	0.00039878
1169	1	2	170	70	(2098.2706266598498, 'Miss', 'Miss')	312	2100.87	0	2101.87	2105.14	right	0.270173	0	45	1	1	80	1	sub-10	0.108571	FALSE	-0.426494	1.70089	0.934158	0	0	1	0.393064	1.34717	1.72407	0.000203847
1170	1	2	171	71	(2108.139348153022, 'Miss', 'Miss')	408	2111.54	0	2112.54	2115.79	right	0.254656	0	45	1	1	80	1	sub-10	0.156	FALSE	-3.73199	-0.782596	-0.112518	0	0	1	0.396552	1.33442	1.72181	0.000145186
1171	1	2	172	72	(2118.7914855911267, 'Miss', 'Miss')	360	2121.79	1	2122.79	2126.09	left	0.303972	45	315	1	1	80	1	sub-10	0.102857	FALSE	-5.96115	0.648019	-0.0220471	0	0	2	0.4	1.32193	1.7195	2.35277e-05
1172	1	2	173	73	(2129.0936545582217, 'Miss', 'Miss')	312	2131.69	0	2132.69	2136.23	right	0.536325	0	45	1	1	80	1	sub-10	0.114857	FALSE	-5.2938	-7.01641	5.82211	0	0	1	0.397727	1.33015	1.71727	2.30904e-05
1173	1	2	174	74	(2139.2290627664124, 'Miss', 'Miss')	408	2142.63	1	2143.63	2147.03	left	0.403144	45	315	1	1	80	1	sub-10	0.0897143	FALSE	-0.611471	0.704806	-0.37698	0	0	2	0.40113	1.31786	1.71499	2.26752e-05
1174	1	2	175	75	(2150.031245465888, 'Miss', 'Miss')	312	2152.63	0	2153.63	2157.32	left	0.686483	45	45	0	1	20	0	sub-10	0.106286	FALSE	-5.04954	-7.74152	2.3878	0	0	3	0.0955056	3.38827	1.72413	0.0001983
1175	1	2	176	76	(2160.316710309745, 'Miss', 'Miss')	408	2163.72	1	2164.72	2167.98	left	0.270278	45	315	1	1	80	1	sub-10	0.125143	FALSE	0.175292	1.8274	3.01215	0	0	2	0.402235	1.31389	1.72182	0.000196927
1176	1	2	177	77	(2170.985556864679, 'Miss', 'Miss')	336	2173.79	0	2174.79	2178.14	right	0.354944	0	45	1	1	80	1	sub-10	0.445143	TRUE	-5.00668	-5.17751	0.831035	0	0	1	0.394444	1.34211	1.71969	2.22393e-05
1177	1	2	178	78	(2181.137625363458, 'Miss', 'Miss')	408	2184.54	0	2185.54	2188.81	left	0.271149	45	315	1	1	80	1	sub-10	0.481714	TRUE	0.0277417	2.31268	2.35717	0	0	2	0.403315	1.31002	1.7174	2.18583e-05
1178	1	2	179	79	(2191.806437795506, 'Miss', 'Miss')	300	2194.31	0	2195.31	2199.02	left	0.719913	45	315	1	1	80	1	sub-10	0.114286	FALSE	-0.968076	-3.04687	1.18739	0	0	2	0.406593	1.29834	1.71508	0.00012725
1179	1	2	180	80	(2202.025273683571, 'Miss', 'Miss')	312	2204.63	1	2205.63	2208.89	right	0.271524	0	315	0	1	20	0	sub-10	0.494857	TRUE	1.3813	9.55678	-9.15457	0	0	0	0.0983607	3.34577	1.72375	0.000180766
1180	1	2	181	81	(2211.8939624409677, 'Miss', 'Miss')	408	2215.29	0	2216.29	2219.55	left	0.253054	45	315	1	1	80	1	sub-10	0.485714	TRUE	0.943415	10.227	-0.490313	0	0	2	0.407609	1.29474	1.7214	0.000179558
1181	1	2	182	82	(2222.5461789442934, 'Miss', 'Miss')	324	2225.25	1	2226.25	2229.56	right	0.321446	0	45	1	1	80	1	sub-10	0.265143	FALSE	-10.2552	-6.71279	-1.45195	0	0	1	0.389189	1.36146	1.71943	2.10925e-05
1182	1	2	183	83	(2232.5648793950213, 'Miss', 'Miss')	360	2235.57	0	2236.57	2239.82	left	0.254073	45	315	1	1	80	1	sub-10	0	FALSE	-1.04151	-0.579791	-3.16155	0	0	2	0.408602	1.29123	1.71711	2.07589e-05
1183	1	2	184	84	(2242.816956244197, 'Miss', 'Miss')	396	2246.12	0	2247.12	2250.38	left	0.271238	45	315	1	1	80	1	sub-10	0.102857	FALSE	0.692083	3.13011	0.477986	0	0	2	0.411765	1.28011	1.71476	0.000117976
1184	1	2	185	85	(2253.38582718451, 'Miss', 'Miss')	324	2256.09	1	2257.09	2260.34	right	0.253991	0	315	0	1	20	0	sub-10	0	FALSE	-6.48174	-2.25205	4.61219	0	0	0	0.101064	3.30666	1.72301	0.000165446
1185	1	2	186	86	(2263.3378595629665, 'Miss', 'Miss')	372	2266.44	0	2267.44	2270.76	right	0.320244	0	45	1	1	80	1	sub-10	0	FALSE	-11.3778	-6.3899	-1.75193	0	0	1	0.386243	1.37242	1.72113	0.000167682
1186	1	2	187	87	(2273.7566741450346, 'Miss', 'Miss')	396	2277.06	0	2278.06	2281.29	left	0.236873	45	315	1	1	80	1	sub-10	0.292	FALSE	0.11082	2.16862	3.61867	0	0	2	0.410526	1.28445	1.71881	2.00649e-05
1187	1	2	188	88	(2284.292154593869, 'Miss', 'Miss')	372	2287.39	0	2288.39	2291.66	right	0.270781	0	45	1	1	80	1	sub-10	0.181143	FALSE	4.45159	2.47051	-4.96569	0	0	1	0.387435	1.36798	1.71696	1.96867e-05
1188	1	2	189	89	(2294.6609916332354, 'Miss', 'Miss')	312	2297.26	1	2298.26	2301.56	right	0.303508	0	45	1	1	80	1	sub-10	0.110286	FALSE	0.511508	4.95481	-4.26929	0	0	1	0.390625	1.35614	1.71506	0.000122232
1189	1	2	190	90	(2304.562967958612, 'Miss', 'Miss')	384	2307.76	0	2308.76	2312.25	right	0.487713	0	315	0	1	20	0	sub-10	0.133714	FALSE	-0.991562	-5.29567	3.59669	0	0	0	0.103627	3.27053	1.72291	0.000155053
1190	1	2	191	91	(2315.248483681632, 'Miss', 'Miss')	372	2318.35	0	2319.35	2322.78	right	0.43761	0	45	1	1	80	1	sub-10	0.202857	FALSE	5.82165	3.89687	-3.4776	0	0	1	0.391753	1.35199	1.72098	0.000154011
1191	1	2	192	92	(2325.7839927049163, 'Miss', 'Miss')	360	2328.78	1	2329.78	2333.04	left	0.254558	45	45	0	1	20	0	sub-10	0.237143	FALSE	-1.73975	-2.02074	2.11067	0	0	3	0.0923077	3.43741	1.72955	0.00017337
1192	1	2	193	93	(2336.0361303094733, 'Miss', 'Miss')	312	2338.64	0	2339.64	2342.89	right	0.253932	0	45	1	1	80	1	sub-10	0.104	FALSE	-0.975347	5.75751	-4.62038	0	0	1	0.392857	1.34792	1.72759	0.000172254
1193	1	2	194	94	(2345.888099408009, 'Miss', 'Miss')	336	2348.69	0	2349.69	2353.01	left	0.321299	45	45	0	1	20	0	sub-10	0.0342857	FALSE	1.70674	2.28156	-1.42676	0	0	3	0.0964467	3.37412	1.73573	0.000161479
1194	1	2	195	95	(2356.0069041970864, 'Miss', 'Miss')	372	2359.11	0	2360.11	2363.41	right	0.3049	0	45	1	1	80	1	sub-10	0.0965714	FALSE	-5.24224	-3.02776	3.01709	0	0	1	0.393939	1.34395	1.73374	0.000160442
1195	1	2	196	96	(2366.4090490562257, 'Miss', 'Miss')	360	2369.41	1	2370.41	2373.89	right	0.487227	0	45	1	1	80	1	sub-10	0.107429	FALSE	1.33995	2.46749	2.45432	0	0	1	0.396985	1.33284	1.73171	0.000110781
1196	1	2	197	97	(2376.894502026428, 'Miss', 'Miss')	396	2380.19	1	2381.2	2384.93	left	0.737008	45	315	1	1	80	1	sub-10	0.110286	FALSE	-3.91429	-1.96622	0.107919	0	0	2	0.395	1.34008	1.72973	1.85785e-05
1197	1	2	198	98	(2387.930089976223, 'Miss', 'Miss')	324	2390.63	1	2391.63	2394.9	left	0.269918	45	315	1	1	80	1	sub-10	0.410857	TRUE	-6.805	-3.88442	3.02015	0	0	2	0.39801	1.32912	1.72772	0.000108121
1198	1	2	199	99	(2397.898785696908, 'Miss', 'Miss')	336	2400.7	0	2401.7	2405.02	left	0.321628	45	45	0	1	20	0	sub-10	0.231429	FALSE	0.995483	1.19407	-4.57692	0	0	3	0.0990099	3.33628	1.73549	0.000148535
1199	1	2	200	100	(2408.0175447113825, 'Miss', 'Miss')	348	2410.92	1	2411.92	2431.29	right	16.3733	0	45	1	1	80	1	sub-10	0.226286	FALSE	-2.85071	-2.6263	4.02001	1	1	1	0.394089	1.34341	1.73354	0.000148153
1200	1	1	1	1	(71.86177928929465, 'Miss', 'Miss')	324	74.5653	0	75.5654	80.4332	right	1.87062	0	315	1	1	80	0	sub-11	0	FALSE	0.524729	-1.59222	8.13993	0	0	0	0.25	2	1.92193	0.0780719
1201	1	1	2	2	(83.43407860858497, 'Miss', 'Miss')	312	86.0343	1	87.0345	90.0684	right	0.0369448	45	315	0	1	20	0	sub-11	0	FALSE	-2.98907	3.66648	1.08342	0	0	2	0.2	2.32193	1.9183	0.0817042
1202	1	1	3	3	(93.06942814205831, 'Miss', 'Miss')	348	95.9697	1	96.9699	100.104	left	0.137005	0	315	1	1	80	1	sub-11	0	FALSE	2.64168	3.68778	-2.36364	0	0	0	0.333333	1.58496	1.84237	0.0509857
1203	1	1	4	4	(103.10488820038881, 'Miss', 'Miss')	300	105.605	1	106.605	109.706	left	0.104153	0	45	0	1	20	0	sub-11	0	FALSE	-0.214001	-2.72084	-2.01988	0	0	1	0.142857	2.80735	1.90564	0.0543234
1204	1	1	5	5	(112.7067848224724, 'Miss', 'Miss')	312	115.307	1	116.307	120.041	right	0.737587	45	45	1	1	80	1	sub-11	0	FALSE	-1.98068	-5.83258	3.23244	0	0	3	0.125	3	1.97494	0.0818744
1205	1	1	6	6	(123.04230211292816, 'Miss', 'Miss')	396	126.343	0	127.343	130.677	right	0.336317	45	315	0	1	20	0	sub-11	0	FALSE	-3.53782	-8.36744	1.22575	0	0	2	0.222222	2.16993	1.97095	0.0535607
1206	1	1	7	7	(133.6777820346615, 'Miss', 'Miss')	312	136.278	1	137.278	140.479	left	0.203434	45	315	0	1	20	1	sub-11	0.106857	FALSE	-11.6628	-14.9075	4.91901	0	0	2	0.3	1.73697	1.93626	0.0741297
1207	1	1	8	8	(143.47977941635327, 'Miss', 'Miss')	384	146.68	1	147.68	150.864	left	0.186625	0	315	1	1	80	1	sub-11	0	FALSE	1.3224	-5.80772	1.05914	0	0	0	0.272727	1.87447	1.9183	0.0136573
1208	1	1	9	9	(153.8654038055065, 'Miss', 'Miss')	324	156.566	1	157.566	174.869	left	14.3079	45	45	1	1	80	0	sub-11	0	FALSE	1.74178	5.85065	1.85025	1	1	3	0.166667	2.58496	1.95006	0.0216871
1209	1	1	10	10	(177.87044705695735, 'Miss', 'Miss')	348	180.771	0	181.771	185.055	right	0.287135	0	315	1	1	80	0	sub-11	0	FALSE	-3.59749	0.253231	-0.455169	0	0	0	0.307692	1.70044	1.92417	0.017931
1210	1	1	11	11	(188.0557196197442, 'Miss', 'Miss')	324	190.756	1	191.756	194.84	left	0.086276	0	315	1	1	80	1	sub-11	0	FALSE	-3.2339	-3.31295	0.950108	0	0	0	0.357143	1.48543	1.88925	0.0275341
1211	1	1	12	12	(197.84113522122425, 'Miss', 'Miss')	336	200.641	1	201.642	205.259	left	0.621364	0	315	1	1	80	1	sub-11	0	FALSE	-8.6521	-13.5223	5.16262	0	0	0	0.4	1.32193	1.8496	0.0197292
1212	1	1	13	13	(208.25990458353408, 'Miss', 'Miss')	408	211.66	0	212.66	216.028	right	0.369834	0	45	0	1	20	1	sub-11	0	FALSE	-3.24418	-5.89314	4.11239	0	0	1	0.125	3	1.90151	0.0142298
1213	1	1	14	14	(219.02879527628465, 'Miss', 'Miss')	324	221.729	1	222.729	225.947	left	0.220428	45	45	1	1	80	0	sub-11	0	FALSE	-3.17902	1.98601	-2.70593	0	0	3	0.176471	2.5025	1.92513	0.0197993
1214	1	1	15	15	(228.94752898988736, 'Miss', 'Miss')	408	232.348	1	233.348	237.199	left	0.853946	0	315	1	1	80	1	sub-11	0	FALSE	-1.92463	6.1527	0.663078	0	0	0	0.388889	1.36257	1.89241	0.00802536
1215	1	1	16	16	(240.19984747347917, 'Miss', 'Miss')	324	242.9	0	243.9	247.668	left	0.771202	0	315	1	1	80	1	sub-11	0	FALSE	-4.96375	-5.80879	4.39378	0	0	0	0.421053	1.24793	1.85772	0.0111534
1216	1	1	17	17	(250.6686948051938, 'Miss', 'Miss')	312	253.269	0	254.269	257.92	left	0.654803	45	45	1	1	80	0	sub-11	0	FALSE	-8.37266	-4.55753	4.28105	0	0	3	0.2	2.32193	1.87356	0.00508464
1217	1	1	18	18	(260.9207799770229, 'Miss', 'Miss')	324	263.621	0	264.621	267.972	right	0.353086	45	45	1	1	80	1	sub-11	0.105714	FALSE	-1.39893	2.82445	-2.37511	0	0	3	0.238095	2.07039	1.87789	0.0220317
1218	1	1	19	19	(270.97287924188277, 'Miss', 'Miss')	372	274.073	0	275.073	278.991	right	0.92029	45	45	1	1	80	1	sub-11	0	FALSE	-11.1767	-3.67418	1.39379	0	0	3	0.272727	1.87447	1.87418	0.0164941
1219	1	1	20	20	(281.9917980235914, 'Miss', 'Miss')	312	284.592	0	285.592	289.443	left	0.853827	0	315	1	1	80	1	sub-11	0	FALSE	8.17542	5.19835	-4.16302	0	0	0	0.391304	1.35364	1.85056	0.0026682
1220	1	1	21	21	(292.44405053626906, 'Miss', 'Miss')	384	295.644	0	296.645	300.895	left	1.2539	0	315	1	1	80	1	sub-11	0	FALSE	-11.6168	-9.59479	6.80081	0	0	0	0.416667	1.26303	1.82545	0.00708868
1221	1	1	22	22	(303.89638044963795, 'Miss', 'Miss')	396	307.197	1	308.197	312.181	left	0.986869	45	45	1	1	80	0	sub-11	0.113143	FALSE	-1.71435	3.31445	2.58513	0	0	3	0.28	1.8365	1.82318	0.00197276
1222	1	1	23	23	(315.18203782424825, 'Miss', 'Miss')	312	317.782	1	318.782	322.75	left	0.970755	45	45	1	1	80	0	sub-11	0	FALSE	3.76178	3.25604	-6.25947	0	0	3	0.307692	1.70044	1.81644	0.00982538
1223	1	1	24	24	(325.75083968652325, 'Miss', 'Miss')	360	328.751	0	329.751	334.052	left	1.30515	0	315	1	1	80	1	sub-11	0	FALSE	-14.6886	-7.49648	5.70449	0	0	0	0.407407	1.29546	1.79651	0.0015025
1224	1	1	25	25	(337.05319868757215, 'Miss', 'Miss')	348	339.953	0	340.954	344.988	right	1.0382	45	45	1	1	80	1	sub-11	0	FALSE	5.02493	2.80507	-4.70273	0	0	3	0.321429	1.63743	1.78923	0.00126518
1225	1	1	26	26	(347.9887719062681, 'Miss', 'Miss')	324	350.689	1	351.689	355.773	left	1.08806	0	315	1	1	80	1	sub-11	0	FALSE	-12.6423	-16.5524	13.4167	0	0	0	0.413793	1.27302	1.77089	0.00117215
1226	1	1	27	27	(358.774343696241, 'Miss', 'Miss')	324	361.475	1	362.475	366.626	left	1.15382	0	315	1	1	80	1	sub-11	0	FALSE	4.32001	6.3944	-2.01908	0	0	0	0.433333	1.20645	1.75171	0.00421997
1227	1	1	28	28	(369.62654083552115, 'Miss', 'Miss')	372	372.727	1	373.727	377.928	left	1.2039	0	315	1	1	80	1	sub-11	0	FALSE	-5.08772	-2.04445	4.33118	0	0	0	0.451613	1.14684	1.73195	0.00366444
1228	1	1	29	29	(380.9288984494633, 'Miss', 'Miss')	372	384.029	1	385.029	389.03	left	1.00492	0	315	1	1	80	1	sub-11	0	FALSE	10.3997	11.0659	-6.22509	0	0	0	0.46875	1.09311	1.71184	0.00320587
1229	1	1	30	30	(392.03117860722705, 'Miss', 'Miss')	324	394.731	0	395.732	399.691	left	0.955109	0	315	1	1	80	1	sub-11	0	FALSE	-5.14054	-8.2368	3.36105	0	0	0	0.484848	1.04439	1.69155	0.00282328
1230	1	1	31	31	(402.6916944620207, 'Miss', 'Miss')	396	405.992	1	406.992	410.693	left	0.704784	45	45	1	1	80	0	sub-11	0	FALSE	-1.26622	1.75052	-4.21769	0	0	3	0.294118	1.76553	1.69227	0.000808447
1231	1	1	32	32	(413.693931869082, 'Miss', 'Miss')	372	416.794	0	417.794	421.829	right	1.03795	45	45	1	1	80	1	sub-11	0	FALSE	-1.35706	-6.66137	1.61749	0	0	3	0.314286	1.66985	1.69044	0.00521598
1232	1	1	33	33	(424.8296052925434, 'Miss', 'Miss')	348	427.73	1	428.73	432.314	left	0.586759	45	45	1	1	80	0	sub-11	0	FALSE	-6.00711	-4.10355	6.71287	0	0	3	0.333333	1.58496	1.68655	0.00450817
1233	1	1	34	34	(435.3150638111838, 'Miss', 'Miss')	372	438.415	0	439.416	443.383	right	0.971523	45	45	1	1	80	1	sub-11	0	FALSE	-0.383643	-2.56759	2.23338	0	0	3	0.351351	1.50901	1.68096	0.00393154
1234	1	1	35	35	(446.38405834291916, 'Miss', 'Miss')	324	449.084	1	450.084	453.802	left	0.72015	0	315	1	1	80	1	sub-11	0	FALSE	-1.30189	1.30481	-3.34978	0	0	0	0.447368	1.16046	1.66703	0.000490422
1235	1	1	36	36	(456.80284213116465, 'Miss', 'Miss')	312	459.403	1	460.403	464.304	right	0.903708	45	315	0	1	20	0	sub-11	0	FALSE	-2.3819	-9.40154	5.22603	0	0	2	0.102564	3.2854	1.70377	0.0033484
1236	1	1	37	37	(467.30500283108995, 'Miss', 'Miss')	372	470.405	0	471.406	475.823	right	1.42078	45	45	1	1	80	1	sub-11	0	FALSE	-7.6664	-7.43183	-1.78029	0	0	3	0.35	1.51457	1.69837	0.00352523
1237	1	1	38	38	(478.82410762413565, 'Miss', 'Miss')	300	481.324	0	482.324	486.209	right	0.888247	45	45	1	1	80	1	sub-11	0	FALSE	-1.02927	-2.4619	9.69377	0	0	3	0.365854	1.45066	1.69177	0.00299927
1238	1	1	39	39	(489.2095386502697, 'Miss', 'Miss')	348	492.11	1	493.11	496.944	left	0.837093	45	45	1	1	80	0	sub-11	0	FALSE	-8.67299	-2.07431	6.52016	0	0	3	0.380952	1.39232	1.68417	0.00267628
1239	1	1	40	40	(499.94505355489673, 'Miss', 'Miss')	360	502.945	1	503.946	507.83	right	0.887906	45	45	1	1	80	1	sub-11	0	FALSE	-4.38802	3.19326	-1.29001	0	0	3	0.395349	1.3388	1.67575	0.00240058
1240	1	1	41	41	(510.8306353597982, 'Miss', 'Miss')	324	513.531	0	514.531	518.499	right	0.969748	45	45	1	1	80	1	sub-11	0	FALSE	-3.94211	-3.82569	-4.29461	0	0	3	0.409091	1.28951	1.66666	0.00216341
1241	1	1	42	42	(521.499534070037, 'Miss', 'Miss')	408	524.9	0	525.9	529.601	left	0.703108	0	45	0	1	20	0	sub-11	0	FALSE	-8.80124	-10.1418	9.22023	0	0	1	0.0666667	3.90689	1.71098	0.00417831
1242	1	1	43	43	(532.6017914792101, 'Miss', 'Miss')	360	535.602	1	536.602	540.236	right	0.637349	45	315	0	1	20	0	sub-11	0	FALSE	-8.40111	-7.75402	6.41068	0	0	2	0.108696	3.20163	1.74014	0.00616545
1243	1	1	44	44	(543.2373077432021, 'Miss', 'Miss')	384	546.438	0	547.438	551.189	right	0.754087	45	45	1	1	80	1	sub-11	0.346286	FALSE	-6.44572	-7.24949	2.54424	0	0	3	0.404255	1.30666	1.73065	0.00231233
1244	1	1	45	45	(554.189568439826, 'Miss', 'Miss')	360	557.19	0	558.19	561.724	left	0.537275	0	315	1	1	80	1	sub-11	0	FALSE	4.26619	6.25067	-2.92961	0	0	0	0.375	1.41504	1.72371	0.000329199
1245	1	1	46	46	(564.7250494435066, 'Miss', 'Miss')	348	567.625	1	568.626	572.31	left	0.68821	0	45	0	1	20	0	sub-11	0.114286	FALSE	-0.694952	2.52011	-3.26003	0	0	1	0.0816327	3.61471	1.75848	0.00294007
1246	1	1	47	47	(575.310577900189, 'Miss', 'Miss')	312	577.911	0	578.911	582.478	left	0.570162	0	315	1	1	80	1	sub-11	0	FALSE	0.0156513	10.7913	-1.42691	0	0	0	0.38	1.39593	1.75092	0.00286592
1247	1	1	48	48	(585.4793269413494, 'Miss', 'Miss')	396	588.78	0	589.78	593.297	right	0.520643	45	45	1	1	80	1	sub-11	0	FALSE	-5.21873	8.98048	-1.43129	0	0	3	0.392157	1.3505	1.74281	0.000304693
1248	1	1	49	49	(596.2982362352304, 'Miss', 'Miss')	312	598.898	0	599.899	603.916	left	1.02127	0	45	0	1	20	0	sub-11	0.108571	FALSE	-8.82774	5.75054	0.827085	0	0	1	0.0961538	3.37851	1.77138	0.00217248
1249	1	1	50	50	(606.917060859967, 'Miss', 'Miss')	360	609.917	0	610.918	614.785	right	0.871718	45	45	1	1	80	1	sub-11	0.312571	FALSE	0.755247	4.40334	1.34646	0	0	3	0.396226	1.3356	1.76293	0.00212108
1250	1	1	51	51	(617.785971277408, 'Miss', 'Miss')	324	620.486	0	621.486	625.537	right	1.0532	45	45	1	1	80	1	sub-11	0	FALSE	-0.979496	-0.500183	-0.87539	0	0	3	0.407407	1.29546	1.75409	0.00144482
1251	1	1	52	52	(628.538197518239, 'Miss', 'Miss')	300	631.038	1	632.039	635.856	right	0.820527	45	315	0	1	20	0	sub-11	0	FALSE	-13.536	-10.0124	4.45915	0	0	2	0.109091	3.1964	1.77804	0.00167088
1252	1	1	53	53	(638.8569779496793, 'Miss', 'Miss')	384	642.057	1	643.058	646.858	left	0.804888	0	315	1	1	80	1	sub-11	0	FALSE	-5.40088	1.64531	-4.14954	0	0	0	0.357143	1.48543	1.77251	0.00171396
1253	1	1	54	54	(649.8592505893139, 'Miss', 'Miss')	324	652.559	0	653.56	657.277	left	0.720159	0	315	1	1	80	1	sub-11	0	FALSE	-11.7544	-4.15776	4.54073	0	0	0	0.368421	1.44057	1.76642	0.00153044
1254	1	1	55	55	(660.2780304936532, 'Miss', 'Miss')	384	663.478	1	664.479	668.263	left	0.78659	0	315	1	1	80	1	sub-11	0	FALSE	1.21745	-1.36426	2.12862	0	0	0	0.37931	1.39855	1.75984	0.00141009
1255	1	1	56	56	(671.2635976229394, 'Miss', 'Miss')	408	674.664	1	675.664	679.648	right	0.987269	45	45	1	1	80	1	sub-11	0	FALSE	-3.92888	-8.16404	8.41124	0	0	3	0.389831	1.35908	1.75285	0.000233913
1256	1	1	57	57	(682.6493132838732, 'Miss', 'Miss')	372	685.75	0	686.75	690.551	right	0.805084	45	315	0	1	20	0	sub-11	0	FALSE	-4.76	-2.45114	2.40393	0	0	2	0.116667	3.09954	1.77351	0.00132823
1257	1	1	58	58	(693.5515589858442, 'Miss', 'Miss')	312	696.152	0	697.152	700.969	left	0.821347	0	315	1	1	80	1	sub-11	0	FALSE	-10.6143	-10.2703	5.23887	0	0	0	0.377049	1.40718	1.76729	0.00131967
1258	1	1	59	59	(703.9703319546388, 'Miss', 'Miss')	336	706.771	0	707.771	711.472	right	0.703859	45	45	1	1	80	1	sub-11	0	FALSE	-9.35777	-9.91814	3.61173	0	0	3	0.387097	1.36923	1.76069	0.000218609
1259	1	1	60	60	(714.4725120740914, 'Miss', 'Miss')	372	717.573	1	718.573	722.49	left	0.920013	0	315	1	1	80	1	sub-11	0	FALSE	-0.806691	-0.442234	2.59844	0	0	0	0.380952	1.39232	1.75465	0.000207005
1260	1	1	61	61	(725.4913426356579, 'Miss', 'Miss')	336	728.292	0	729.292	732.943	left	0.653556	0	315	1	1	80	1	sub-11	0	FALSE	-6.73395	-1.61166	4.91503	0	0	0	0.390625	1.35614	1.74825	0.001103
1261	1	1	62	62	(735.9435485414688, 'Miss', 'Miss')	384	739.144	0	740.144	743.878	right	0.737656	45	315	0	1	20	0	sub-11	0	FALSE	-2.15955	-0.831698	6.87991	0	0	2	0.123077	3.02237	1.76641	0.00106795
1262	1	1	63	63	(746.8791619863296, 'Miss', 'Miss')	384	750.079	0	751.08	754.964	left	0.886453	0	45	0	1	20	0	sub-11	0	FALSE	-8.6563	-6.62531	4.29638	0	0	1	0.0909091	3.45943	1.79014	0.0023394
1263	1	1	64	64	(757.9646952978947, 'Miss', 'Miss')	360	760.965	0	761.965	765.866	right	0.903243	45	45	1	1	80	1	sub-11	0.088	FALSE	0.910865	6.22335	-7.93437	0	0	3	0.373134	1.42223	1.78447	0.00145949
1264	1	1	65	65	(768.8670106327481, 'Miss', 'Miss')	336	771.667	1	772.667	776.035	right	0.370454	45	45	1	1	80	1	sub-11	0	FALSE	-1.40498	-2.16549	3.0713	0	0	3	0.382353	1.38702	1.77846	0.00101177
1265	1	1	66	66	(779.0357530157817, 'Miss', 'Miss')	384	782.236	1	783.236	786.704	left	0.470002	0	315	1	1	80	1	sub-11	0.198286	FALSE	-3.38878	-9.94434	8.04336	0	0	0	0.376812	1.40808	1.77293	0.000182401
1266	1	1	67	67	(789.7045768221287, 'Miss', 'Miss')	312	792.305	0	793.305	797.039	right	0.736681	45	315	0	1	20	0	sub-11	0	FALSE	-5.78205	-2.0355	4.60733	0	0	2	0.128571	2.95936	1.7887	0.000891719
1267	1	1	68	68	(800.0400205957958, 'Miss', 'Miss')	384	803.24	0	804.241	807.991	left	0.754497	0	315	1	1	80	1	sub-11	0	FALSE	0.391751	-3.34045	7.45374	0	0	0	0.380282	1.39486	1.783	0.000873553
1268	1	1	69	69	(810.9922904473387, 'Miss', 'Miss')	348	813.893	0	814.893	818.527	left	0.636637	0	315	1	1	80	1	sub-11	0	FALSE	2.65363	-1.19071	-13.1826	0	0	0	0.388889	1.36257	1.77703	0.00087751
1269	1	1	70	70	(821.5277761671896, 'Miss', 'Miss')	408	824.928	1	825.928	829.512	left	0.586444	0	45	0	1	20	0	sub-11	0	FALSE	-2.89731	-1.77096	4.33111	0	0	1	0.0958904	3.38247	1.79753	0.00113808
1270	1	1	71	71	(832.5133813032662, 'Miss', 'Miss')	348	835.414	0	836.414	839.981	left	0.570377	0	45	0	1	20	0	sub-11	0	FALSE	-6.79597	2.49211	6.82159	0	0	1	0.108108	3.20945	1.81533	0.00451428
1271	1	1	72	72	(842.9822075509219, 'Miss', 'Miss')	408	846.383	1	847.383	851.234	right	0.853747	45	45	1	1	80	1	sub-11	0	FALSE	-11.2779	-8.47041	11.428	0	0	3	0.36	1.47393	1.81061	0.000978652
1272	1	1	73	73	(854.234473879209, 'Miss', 'Miss')	360	857.235	1	858.235	861.602	right	0.369953	45	45	1	1	80	1	sub-11	0	FALSE	-0.704968	7.67322	-10.3847	0	0	3	0.368421	1.44057	1.8056	0.000859569
1273	1	1	74	74	(864.6032415631162, 'Miss', 'Miss')	384	867.804	0	868.804	872.588	right	0.78747	45	45	1	1	80	1	sub-11	0	FALSE	-8.50239	-7.80473	5.76855	0	0	3	0.376623	1.40881	1.80032	0.000808246
1274	1	1	75	75	(875.588813685994, 'Miss', 'Miss')	312	878.189	1	879.189	882.84	left	0.654413	0	315	1	1	80	1	sub-11	0	FALSE	-4.65292	-7.98464	6.89261	0	0	0	0.371795	1.42742	1.7954	0.000152325
1275	1	1	76	76	(885.8409881876541, 'Miss', 'Miss')	312	888.441	1	889.441	893.109	right	0.669732	45	45	1	1	80	1	sub-11	0.0297143	FALSE	11.1456	13.0358	-5.84023	0	0	3	0.379747	1.39689	1.79024	0.000146189
1276	1	1	77	77	(896.109715062812, 'Miss', 'Miss')	312	898.71	1	899.71	903.511	right	0.80432	45	45	1	1	80	1	sub-11	0	FALSE	-4.53928	-3.16908	4.1008	0	0	3	0.3875	1.36773	1.78485	0.000714708
1277	1	1	78	78	(906.5118835028043, 'Miss', 'Miss')	384	909.712	1	910.712	914.613	left	0.904484	0	315	1	1	80	1	sub-11	0	FALSE	-1.89914	1.06069	-5.31793	0	0	0	0.37037	1.43296	1.78037	0.000134569
1278	1	1	79	79	(917.6141384151815, 'Miss', 'Miss')	324	920.314	1	921.315	925.315	left	1.00368	0	315	1	1	80	1	sub-11	0.126286	FALSE	-2.90567	9.21163	-7.23341	0	0	0	0.378049	1.40336	1.77566	0.000708173
1279	1	1	80	80	(928.3162966737946, 'Miss', 'Miss')	348	931.217	0	932.217	936.001	left	0.786799	0	315	1	1	80	1	sub-11	0	FALSE	-8.42601	0.193524	1.85049	0	0	0	0.385542	1.37504	1.77073	0.000669435
1280	1	1	81	81	(939.0018451325923, 'Miss', 'Miss')	348	941.902	1	942.902	946.67	right	0.770596	45	45	1	1	80	1	sub-11	0	FALSE	-4.62524	-4.09847	9.68254	0	0	3	0.380952	1.39232	1.76611	0.000119223
1281	1	1	82	82	(949.6707038940876, 'Miss', 'Miss')	348	952.571	0	953.571	957.005	right	0.437197	45	45	1	1	80	1	sub-11	0	FALSE	6.2047	0.0399674	-2.80165	0	0	3	0.388235	1.365	1.7613	0.000631001
1282	1	1	83	83	(960.0061423967418, 'Miss', 'Miss')	408	963.407	1	964.407	968.524	left	1.11998	0	315	1	1	80	1	sub-11	0	FALSE	-11.2009	-3.35743	7.67097	0	0	0	0.383721	1.38187	1.75678	0.000110349
1283	1	1	84	84	(971.5251664600328, 'Miss', 'Miss')	360	974.525	1	975.526	979.376	left	0.854446	0	45	0	1	20	0	sub-11	0	FALSE	2.22145	3.28698	-6.12406	0	0	1	0.103448	3.27302	1.77323	0.000746403
1284	1	1	85	85	(982.3774246321191, 'Miss', 'Miss')	336	985.178	1	986.178	990.112	right	0.936612	45	45	1	1	80	1	sub-11	0	FALSE	-0.156159	6.66806	-1.97961	0	0	3	0.386364	1.37197	1.76857	0.000735201
1285	1	1	86	86	(993.1128954266715, 'Miss', 'Miss')	384	996.313	0	997.313	1001.38	left	1.07031	0	315	1	1	80	1	sub-11	0	FALSE	-5.08165	-9.59845	4.7663	0	0	0	0.382022	1.38827	1.7642	0.000105326
1286	1	1	87	87	(1004.3818822460853, 'Miss', 'Miss')	360	1007.38	0	1008.38	1012.2	right	0.819759	45	45	1	1	80	1	sub-11	0	FALSE	3.95409	3.44961	-1.38813	0	0	3	0.388889	1.36257	1.75965	0.000101621
1287	1	1	88	88	(1015.2007840495753, 'Miss', 'Miss')	336	1018	1	1019	1022.5	left	0.50434	0	45	0	1	20	0	sub-11	0.108571	FALSE	1.31903	0.393996	-3.03492	0	0	1	0.10989	3.18587	1.77448	0.000635164
1288	1	1	89	89	(1025.5029130679286, 'Miss', 'Miss')	324	1028.2	0	1029.2	1032.92	left	0.720653	0	315	1	1	80	1	sub-11	0	FALSE	0.639203	-7.54587	7.43528	0	0	0	0.380435	1.39428	1.77026	0.000632068
1289	1	1	90	90	(1035.9216913077362, 'Miss', 'Miss')	300	1038.42	0	1039.42	1043.46	left	1.03727	0	315	1	1	80	1	sub-11	0	FALSE	-2.40671	9.45304	-5.42936	0	0	0	0.387097	1.36923	1.76586	0.000529518
1290	1	1	91	91	(1046.457149285401, 'Miss', 'Miss')	408	1049.86	0	1050.86	1054.33	left	0.469931	0	315	1	1	80	1	sub-11	0.197714	FALSE	0.803771	-9.52805	4.57258	0	0	0	0.393617	1.34514	1.76131	0.000504208
1291	1	1	92	92	(1057.3260253025364, 'Miss', 'Miss')	372	1060.43	0	1061.43	1065.03	right	0.603476	45	45	1	1	80	1	sub-11	0.231429	FALSE	-1.35353	-0.800484	-5.09823	0	0	3	0.378947	1.39993	1.75742	9.05915e-05
1292	1	1	93	93	(1068.0282151872343, 'Miss', 'Miss')	396	1071.33	0	1072.33	1076.2	left	0.870578	0	315	1	1	80	1	sub-11	0.101714	FALSE	4.61854	8.68678	0.507593	0	0	0	0.395833	1.33703	1.75297	8.77454e-05
1293	1	1	94	94	(1079.1971831142218, 'Miss', 'Miss')	372	1082.3	1	1083.3	1086.77	left	0.470066	0	315	1	1	80	1	sub-11	0	FALSE	0.658046	-5.21703	3.39077	0	0	0	0.402062	1.31451	1.74838	0.000456976
1294	1	1	95	95	(1089.7659894152457, 'Miss', 'Miss')	300	1092.27	1	1093.27	1097.03	right	0.770741	45	45	1	1	80	1	sub-11	0.120571	FALSE	-2.4852	4.3577	-5.7841	0	0	3	0.377551	1.40526	1.7448	8.20065e-05
1295	1	1	96	96	(1100.0348095041372, 'Miss', 'Miss')	324	1102.74	1	1103.74	1107.75	right	1.02031	45	45	1	1	80	1	sub-11	0	FALSE	1.04692	0.507611	5.54462	0	0	3	0.383838	1.38143	1.74105	0.000473707
1296	1	1	97	97	(1110.75362833076, 'Miss', 'Miss')	372	1113.85	0	1114.85	1118.34	right	0.487761	45	45	1	1	80	1	sub-11	0.122286	FALSE	1.69581	4.80093	-10.2917	0	0	3	0.39	1.35845	1.73715	0.000452298
1297	1	1	98	98	(1121.339162890723, 'Miss', 'Miss')	372	1124.44	1	1125.44	1129.17	right	0.737612	45	45	1	1	80	1	sub-11	0	FALSE	-2.31721	-4.06759	2.11442	0	0	3	0.39604	1.33628	1.73311	0.000432232
1298	1	1	99	99	(1132.1747485656597, 'Miss', 'Miss')	372	1135.28	0	1136.28	1140.14	right	0.871447	45	315	0	1	20	0	sub-11	0	FALSE	-7.53382	-6.73001	7.25642	0	0	2	0.0980392	3.3505	1.74821	0.000576189
1299	1	1	100	100	(1143.1436326557669, 'Miss', 'Miss')	396	1146.44	1	1147.44	1150.83	left	0.387872	0	315	1	1	80	1	sub-11	0.285143	FALSE	-1.8565	6.8767	-12.7457	0	0	0	0.38835	1.36457	1.74441	0.000573307
1300	1	2	101	1	(1287.022299166707, 'Miss', 'Miss')	408	1290.42	1	1291.42	1295.32	right	0.904014	45	45	1	1	80	1	sub-11	0	FALSE	-6.81539	-8.14589	10.7371	0	0	3	0.394231	1.34289	1.74049	7.14653e-05
1301	1	2	102	2	(1298.3253384060845, 'Miss', 'Miss')	348	1301.23	0	1302.23	1305.84	right	0.620206	45	45	1	1	80	1	sub-11	0	FALSE	-6.70333	-4.59393	7.10794	0	0	3	0.4	1.32193	1.73644	0.000393304
1302	1	2	103	3	(1308.8441433061307, 'Miss', 'Miss')	336	1311.64	1	1312.64	1316.45	left	0.803771	0	315	1	1	80	1	sub-11	0	FALSE	-6.08588	-6.13022	7.69733	0	0	0	0.386792	1.37037	1.73292	6.71559e-05
1303	1	2	104	4	(1319.4462829497388, 'Miss', 'Miss')	348	1322.35	0	1323.35	1326.96	right	0.619942	45	45	1	1	80	1	sub-11	0	FALSE	-5.74854	-4.89794	-0.0645215	0	0	3	0.401869	1.3152	1.72896	6.52633e-05
1304	1	2	105	5	(1329.9651180887631, 'Miss', 'Miss')	300	1332.47	0	1333.47	1336.98	right	0.520621	45	315	0	1	20	0	sub-11	0	FALSE	-0.838376	-2.99748	1.88448	0	0	2	0.101852	3.29546	1.74281	0.000491034
1305	1	2	106	6	(1339.9838354622225, 'Miss', 'Miss')	384	1343.18	1	1344.18	1347.97	right	0.787079	45	45	1	1	80	1	sub-11	0	FALSE	-5.94099	-5.52848	3.73447	0	0	3	0.40367	1.30875	1.73878	0.000485398
1306	1	2	107	7	(1350.9694056431472, 'Miss', 'Miss')	372	1354.07	1	1355.07	1359.42	right	1.35488	45	45	1	1	80	1	sub-11	0	FALSE	-0.767848	-4.12266	0.252345	0	0	3	0.409091	1.28951	1.73465	0.000344995
1307	1	2	108	8	(1362.4217774472127, 'Miss', 'Miss')	324	1365.12	0	1366.12	1369.46	left	0.338044	0	315	1	1	80	1	sub-11	0	FALSE	-4.1644	-5.08591	0.757915	0	0	0	0.378378	1.4021	1.73158	6.14238e-05
1308	1	2	109	9	(1372.4570885300236, 'Miss', 'Miss')	372	1375.56	1	1376.56	1380.06	left	0.503963	0	45	0	1	20	0	sub-11	0	FALSE	-5.39489	-7.99057	1.97373	0	0	1	0.0982143	3.34792	1.74538	0.000485628
1309	1	2	110	10	(1383.0593033549449, 'Miss', 'Miss')	312	1385.66	1	1386.66	1390.63	left	0.971248	45	45	1	1	80	0	sub-11	0	FALSE	-3.12029	-4.04323	5.30606	0	0	3	0.40708	1.29662	1.74136	0.000470475
1310	1	2	111	11	(1393.6302186167231, 'Miss', 'Miss')	300	1396.13	1	1397.13	1400.63	right	0.503878	0	45	0	1	20	1	sub-11	0	FALSE	-4.19908	-1.71071	-0.718177	0	0	1	0.105263	3.24793	1.75401	0.000423415
1311	1	2	112	12	(1403.6301573064993, 'Miss', 'Miss')	312	1406.23	0	1407.23	1410.56	left	0.337223	0	315	1	1	80	1	sub-11	0	FALSE	-6.11945	-2.03318	4.08765	0	0	0	0.373913	1.41923	1.75103	0.000430966
1312	1	2	113	13	(1413.5655965304504, 'Miss', 'Miss')	372	1416.67	0	1417.67	1421.03	left	0.371152	0	315	1	1	80	1	sub-11	0	FALSE	1.98824	-1.81689	0.034155	0	0	0	0.37931	1.39855	1.74793	0.000351617
1313	1	2	114	14	(1424.034365074367, 'Miss', 'Miss')	408	1427.43	0	1428.43	1431.99	right	0.553589	45	45	1	1	80	1	sub-11	0	FALSE	-2.58303	-3.03898	3.73306	0	0	3	0.401709	1.31578	1.7442	5.74513e-05
1314	1	2	115	15	(1434.9865960868556, 'Miss', 'Miss')	396	1438.29	1	1439.29	1443.47	right	1.18776	0	315	1	1	80	0	sub-11	0.206857	FALSE	-6.53201	-4.62719	0.127088	0	0	0	0.381356	1.39079	1.74114	5.57185e-05
1315	1	2	116	16	(1446.472243529759, 'Miss', 'Miss')	408	1449.87	1	1450.87	1454.36	right	0.486411	45	315	0	1	20	0	sub-11	0	FALSE	2.97994	5.19513	1.08594	0	0	2	0.10084	3.30986	1.75378	0.000417549
1316	1	2	117	17	(1457.3578478058298, 'Miss', 'Miss')	300	1459.86	0	1460.86	1464.33	left	0.471389	0	315	1	1	80	1	sub-11	0	FALSE	0.221131	-2.7203	0.547701	0	0	0	0.383333	1.38333	1.75064	0.000412939
1317	1	2	118	18	(1467.32657487518, 'Miss', 'Miss')	348	1470.23	0	1471.23	1474.69	left	0.47104	0	315	1	1	80	1	sub-11	0	FALSE	-2.27567	-5.78336	-0.38874	0	0	0	0.38843	1.36427	1.74739	0.000310849
1318	1	2	119	19	(1477.6953192556539, 'Miss', 'Miss')	372	1480.8	1	1481.8	1485.4	right	0.604638	45	315	0	1	20	0	sub-11	0	FALSE	2.87581	1.48538	-5.61423	0	0	2	0.106557	3.2303	1.75906	0.000371073
1319	1	2	120	20	(1488.3975091403554, 'Miss', 'Miss')	384	1491.6	1	1492.6	1496.05	right	0.453725	45	45	1	1	80	1	sub-11	1	TRUE	1.06805	2.57281	1.77088	0	0	3	0.390244	1.35755	1.75575	0.000367097
1320	1	2	121	21	(1499.0497311921172, 'Miss', 'Miss')	312	1501.65	0	1502.65	1506.57	left	0.920102	0	45	0	1	20	0	sub-11	0.112571	FALSE	-4.9873	-7.71686	5.18072	0	0	1	0.104839	3.25376	1.76734	0.000365682
1321	1	2	122	22	(1509.5685588407541, 'Miss', 'Miss')	384	1512.77	0	1513.77	1517.12	right	0.353524	45	315	0	1	20	0	sub-11	0	FALSE	0.508354	6.25431	0.677099	0	0	2	0.112	3.15843	1.77803	0.000645339
1322	1	2	123	23	(1520.120857988044, 'Miss', 'Miss')	408	1523.52	1	1524.52	1528.01	right	0.487734	0	315	1	1	80	0	sub-11	0	FALSE	-6.21745	-5.81184	-0.156157	0	0	0	0.380952	1.39232	1.77492	0.000333101
1323	1	2	124	24	(1531.0062741721122, 'Miss', 'Miss')	312	1533.61	0	1534.61	1538.02	left	0.419763	0	315	1	1	80	1	sub-11	0	FALSE	1.413	-3.8101	4.54384	0	0	0	0.385827	1.37397	1.77172	0.000285271
1324	1	2	125	25	(1541.0250334362645, 'Miss', 'Miss')	396	1544.33	1	1545.33	1549.16	right	0.838174	0	315	1	1	80	0	sub-11	0.291429	FALSE	-4.94305	-1.95179	2.00885	0	0	0	0.390625	1.35614	1.76843	0.000275186
1325	1	2	126	26	(1552.1606000523207, 'Miss', 'Miss')	360	1555.16	0	1556.16	1559.73	left	0.570047	0	315	1	1	80	1	sub-11	0	FALSE	-3.44655	-4.87181	0.297543	0	0	0	0.395349	1.3388	1.76506	0.000265598
1326	1	2	127	27	(1562.7294474117807, 'Miss', 'Miss')	300	1565.23	0	1566.23	1569.93	right	0.703691	45	45	1	1	80	1	sub-11	0	FALSE	-4.34709	-1.13796	0.861928	0	0	3	0.376923	1.40766	1.76226	4.90237e-05
1327	1	2	128	28	(1572.9314867951362, 'Miss', 'Miss')	408	1576.33	0	1577.33	1581.02	right	0.686819	45	45	1	1	80	1	sub-11	0	FALSE	-0.933177	1.00696	0.0623636	0	0	3	0.381679	1.38957	1.75937	0.000272863
1328	1	2	129	29	(1584.0171188688728, 'Miss', 'Miss')	384	1587.22	1	1588.22	1592.07	right	0.854581	0	315	1	1	80	0	sub-11	0	FALSE	-4.75277	0.89607	1.28204	0	0	0	0.393939	1.34395	1.75619	4.66246e-05
1329	1	2	130	30	(1595.0694178774502, 'Miss', 'Miss')	396	1598.37	0	1599.37	1602.84	left	0.471704	0	315	1	1	80	1	sub-11	0.224	FALSE	-3.41939	-2.10469	-3.24114	0	0	0	0.398496	1.32736	1.75293	0.000246573
1330	1	2	131	31	(1605.8382858216064, 'Miss', 'Miss')	408	1609.24	0	1610.24	1613.64	left	0.403171	0	315	1	1	80	1	sub-11	0	FALSE	3.81584	9.89119	-5.28235	0	0	0	0.402985	1.3112	1.74959	0.000238388
1331	1	2	132	32	(1616.640453262884, 'Miss', 'Miss')	372	1619.74	0	1620.74	1624.24	right	0.504404	45	45	1	1	80	1	sub-11	0	FALSE	1.07592	-3.76447	0.832235	0	0	3	0.377778	1.40439	1.74699	4.3402e-05
1332	1	2	133	33	(1627.2426470037462, 'Miss', 'Miss')	360	1630.24	0	1631.24	1634.76	right	0.521599	45	45	1	1	80	1	sub-11	0.365714	FALSE	-0.108832	-8.87899	6.72721	0	0	3	0.382353	1.38702	1.7443	0.000252426
1333	1	2	134	34	(1637.7614713233197, 'Miss', 'Miss')	384	1640.96	1	1641.96	1645.7	right	0.738167	45	45	1	1	80	1	sub-11	0.516	TRUE	-3.4017	-1.90521	-1.93741	0	0	3	0.386861	1.37011	1.74153	0.000244039
1334	1	2	135	35	(1648.697045096862, 'Miss', 'Miss')	384	1651.9	0	1652.9	1656.83	left	0.936941	0	315	1	1	80	1	sub-11	0	FALSE	-8.12496	-0.596117	1.54378	0	0	0	0.398551	1.32716	1.73849	4.0307e-05
1335	1	2	136	36	(1659.8326588746277, 'Miss', 'Miss')	348	1662.73	1	1663.73	1667.83	right	1.10473	45	45	1	1	80	1	sub-11	0	FALSE	1.13023	4.23259	-0.705133	0	0	3	0.388489	1.36405	1.73576	3.93206e-05
1336	1	2	137	37	(1670.8349304045732, 'Miss', 'Miss')	384	1674.04	1	1675.04	1678.72	right	0.687776	45	45	1	1	80	1	sub-11	0	FALSE	4.1365	7.40605	-6.87977	0	0	3	0.392857	1.34792	1.73296	0.000227845
1337	1	2	138	38	(1681.7204531186253, 'Miss', 'Miss')	324	1684.42	0	1685.42	1689.14	left	0.72069	0	45	0	1	20	0	sub-11	0	FALSE	2.77618	5.62636	-6.09782	0	0	1	0.0992908	3.3322	1.7439	0.000301861
1338	1	2	139	39	(1692.1392743588149, 'Miss', 'Miss')	396	1695.44	0	1696.44	1699.92	right	0.488124	45	45	1	1	80	1	sub-11	0	FALSE	-2.03346	4.59031	-1.8275	0	0	3	0.394366	1.34239	1.74104	0.000299144
1339	1	2	140	40	(1702.924848923005, 'Miss', 'Miss')	360	1705.93	1	1706.93	1710.98	right	1.05403	0	315	1	1	80	0	sub-11	0.125714	FALSE	-0.271416	-2.65217	6.8803	0	0	0	0.391608	1.35252	1.73828	3.73993e-05
1340	1	2	141	41	(1713.9770866213585, 'Miss', 'Miss')	372	1717.08	0	1718.08	1721.49	right	0.421111	45	45	1	1	80	1	sub-11	0.446857	TRUE	-2.38788	2.4132	-1.9229	0	0	3	0.395833	1.33703	1.73547	3.65719e-05
1341	1	2	142	42	(1724.4959536638962, 'Miss', 'Miss')	336	1727.3	1	1728.3	1732.06	left	0.769788	0	315	1	1	80	1	sub-11	0.148571	FALSE	-1.56418	-1.5851	-1.71201	0	0	0	0.393103	1.34702	1.73275	3.57425e-05
1342	1	2	143	43	(1735.0647982491355, 'Miss', 'Miss')	336	1737.87	0	1738.87	1742.38	right	0.520326	45	45	1	1	80	1	sub-11	0.225143	FALSE	-1.09057	1.12544	0.497947	0	0	3	0.39726	1.33184	1.72997	3.49635e-05
1343	1	2	144	44	(1745.3835534351892, 'Miss', 'Miss')	396	1748.68	1	1749.68	1753.25	left	0.570808	0	315	1	1	80	1	sub-11	0	FALSE	-2.94673	0.422758	-0.218554	0	0	0	0.394558	1.34169	1.7273	3.41824e-05
1344	1	2	145	45	(1756.2524264006825, 'Miss', 'Miss')	372	1759.35	0	1760.35	1763.77	right	0.420414	45	45	1	1	80	1	sub-11	0	FALSE	-11.7461	-6.36948	4.3826	0	0	3	0.398649	1.32681	1.72456	3.34484e-05
1345	1	2	146	46	(1766.7712429524436, 'Miss', 'Miss')	372	1769.87	1	1770.87	1774.47	left	0.603927	0	315	1	1	80	1	sub-11	0.499429	TRUE	-0.438767	7.67076	-5.29885	0	0	0	0.395973	1.33653	1.72193	3.27121e-05
1346	1	2	147	47	(1777.4734325597237, 'Miss', 'Miss')	396	1780.77	0	1781.77	1785.17	right	0.403073	45	45	1	1	80	1	sub-11	0	FALSE	-3.70601	-1.10711	4.58465	0	0	3	0.4	1.32193	1.71923	3.20198e-05
1347	1	2	148	48	(1788.1755941473966, 'Miss', 'Miss')	312	1790.78	0	1791.78	1795.08	left	0.303417	0	45	0	1	20	0	sub-11	0.153143	FALSE	-5.98437	-6.97546	-0.583636	0	0	1	0.0993377	3.33151	1.72956	0.000262241
1348	1	2	149	49	(1798.0777011384562, 'Miss', 'Miss')	360	1801.08	1	1802.08	1805.45	right	0.369702	45	45	1	1	80	1	sub-11	0	FALSE	-0.590127	2.38564	5.21929	0	0	3	0.401316	1.31719	1.72682	0.000260078
1349	1	2	150	50	(1808.4463936410466, 'Miss', 'Miss')	408	1811.85	1	1812.85	1816.63	right	0.78722	45	45	1	1	80	1	sub-11	0	FALSE	1.97803	1.95642	-3.90096	0	0	3	0.405229	1.30319	1.72402	0.000181122
1350	1	2	151	51	(1819.6321081368114, 'Miss', 'Miss')	408	1823.03	0	1824.03	1827.8	right	0.769915	45	315	0	1	20	0	sub-11	0.140571	FALSE	-3.07465	-3.14745	4.431	0	0	2	0.0974026	3.3599	1.7343	0.000257103
1351	1	2	152	52	(1830.8010130890398, 'Miss', 'Miss')	336	1833.6	0	1834.6	1838.42	right	0.820478	45	45	1	1	80	1	sub-11	0	FALSE	-3.34674	-5.26783	5.12212	0	0	3	0.406452	1.29884	1.73147	0.000255061
1352	1	2	153	53	(1841.419861572056, 'Miss', 'Miss')	360	1844.42	0	1845.42	1849.15	left	0.736958	0	315	1	1	80	1	sub-11	0	FALSE	0.844676	-1.48769	1.50269	0	0	0	0.384615	1.37851	1.72918	3.06383e-05
1353	1	2	154	54	(1852.1554455547157, 'Miss', 'Miss')	408	1855.56	1	1856.56	1860.47	right	0.920651	45	45	1	1	80	1	sub-11	0	FALSE	-9.10682	-2.48707	4.08003	0	0	3	0.407643	1.29462	1.72638	3.00726e-05
1354	1	2	155	55	(1863.474399652223, 'Miss', 'Miss')	372	1866.57	1	1867.57	1871.18	right	0.603157	45	45	1	1	80	1	sub-11	0	FALSE	-6.15775	0.484388	3.0984	0	0	3	0.411392	1.28141	1.72354	0.000165541
1355	1	2	156	56	(1874.1766233823873, 'Miss', 'Miss')	300	1876.68	1	1877.68	1881.06	right	0.386522	45	45	1	1	80	1	sub-11	0	FALSE	-4.62266	5.55801	0.502231	0	0	3	0.415094	1.26849	1.72066	0.00016098
1356	1	2	157	57	(1884.061963830296, 'Miss', 'Miss')	396	1887.36	1	1888.36	1891.75	right	0.38635	45	45	1	1	80	1	sub-11	0	FALSE	-0.727537	-1.37561	-1.23423	0	0	3	0.41875	1.25584	1.71773	0.000156593
1357	1	2	158	58	(1894.7474814952693, 'Miss', 'Miss')	384	1897.95	1	1898.95	1902.28	left	0.338259	0	315	1	1	80	1	sub-11	0.754286	TRUE	1.65917	1.35202	1.00683	0	0	0	0.378882	1.40018	1.71573	2.78733e-05
1358	1	2	159	59	(1905.2829774797283, 'Miss', 'Miss')	348	1908.18	1	1909.18	1912.63	left	0.453222	0	315	1	1	80	1	sub-11	0	FALSE	-2.81435	5.84334	1.08234	0	0	0	0.382716	1.38565	1.71366	0.000177576
1359	1	2	160	60	(1915.6351054022634, 'Miss', 'Miss')	384	1918.84	0	1919.84	1923.49	right	0.653361	45	45	1	1	80	1	sub-11	0	FALSE	-4.08365	-3.30743	3.7738	0	0	3	0.417178	1.26127	1.71086	2.67733e-05
1360	1	2	161	61	(1926.487352477474, 'Miss', 'Miss')	336	1929.29	1	1930.29	1933.66	left	0.370606	0	45	0	1	20	0	sub-11	0	FALSE	-1.61971	-3.74595	-0.698496	0	0	1	0.097561	3.35755	1.7206	0.000224848
1361	1	2	162	62	(1936.6561248220678, 'Miss', 'Miss')	312	1939.26	0	1940.26	1943.97	left	0.72035	0	315	1	1	80	1	sub-11	0.212571	FALSE	6.48837	5.26354	-2.28945	0	0	0	0.381818	1.38904	1.71856	0.000229159
1362	1	2	163	63	(1946.9748641950791, 'Miss', 'Miss')	336	1949.78	0	1950.78	1954.64	right	0.870886	45	315	0	1	20	0	sub-11	0	FALSE	4.84971	2.13859	-1.07974	0	0	2	0.0963855	3.37504	1.72824	0.00022842
1363	1	2	164	64	(1957.6436916079074, 'Miss', 'Miss')	336	1960.44	0	1961.44	1965.01	right	0.571423	45	45	1	1	80	1	sub-11	0	FALSE	-0.757096	-2.12283	0.892562	0	0	3	0.413174	1.27518	1.72551	0.000221815
1364	1	2	165	65	(1968.012525873055, 'Miss', 'Miss')	312	1970.61	1	1971.61	1975.06	left	0.453106	0	45	0	1	20	0	sub-11	0.825143	TRUE	-0.714783	-3.56647	1.75092	0	0	1	0.10119	3.30485	1.73463	0.000206028
1365	1	2	166	66	(1978.0645546727683, 'Miss', 'Miss')	396	1981.36	1	1982.37	1985.88	left	0.520263	0	315	1	1	80	1	sub-11	0	FALSE	-9.40779	-8.9208	6.45997	0	0	0	0.378698	1.40088	1.73263	0.000210173
1366	1	2	167	67	(1988.8834442697007, 'Miss', 'Miss')	384	1992.08	1	1993.08	1996.65	left	0.569854	0	315	1	1	80	1	sub-11	0	FALSE	-3.97599	1.86741	0.401433	0	0	0	0.382353	1.38702	1.73057	0.000161494
1367	1	2	168	68	(1999.6523452270558, 'Miss', 'Miss')	384	2002.85	0	2003.85	2007.75	left	0.903248	0	315	1	1	80	1	sub-11	0.498857	TRUE	0.953999	5.64873	2.78762	0	0	0	0.385965	1.37346	1.72845	0.000157183
1368	1	2	169	69	(2010.754606520135, 'Miss', 'Miss')	300	2013.25	1	2014.25	2017.72	left	0.470653	0	315	1	1	80	1	sub-11	0	FALSE	-3.59905	-7.40347	6.48419	0	0	0	0.389535	1.36018	1.72629	0.000153033
1369	1	2	170	70	(2020.7233252668302, 'Miss', 'Miss')	384	2023.92	0	2024.92	2028.52	right	0.603103	45	45	1	1	80	1	sub-11	0.0257143	FALSE	-1.18887	2.19683	2.82626	0	0	3	0.404624	1.30535	1.72383	2.44746e-05
1370	1	2	171	71	(2031.5254716240452, 'Miss', 'Miss')	384	2034.73	0	2035.73	2039.19	left	0.471259	0	315	1	1	80	1	sub-11	0.352	FALSE	2.6823	-4.53491	0.84702	0	0	0	0.390805	1.35548	1.72169	2.39887e-05
1371	1	2	172	72	(2042.1943941925638, 'Miss', 'Miss')	360	2045.19	0	2046.19	2049.75	right	0.554834	45	45	1	1	80	1	sub-11	0.224	FALSE	-6.1389	-3.7248	-3.05769	0	0	3	0.405714	1.30146	1.71927	2.35759e-05
1372	1	2	173	73	(2052.746552132139, 'Miss', 'Miss')	360	2055.75	1	2056.75	2060.25	right	0.503068	45	315	0	1	20	0	sub-11	0	FALSE	0.93066	-4.69736	2.33229	0	0	2	0.0965909	3.37197	1.7284	0.000199496
1373	1	2	174	74	(2063.248740851668, 'Miss', 'Miss')	348	2066.15	1	2067.15	2070.55	right	0.404349	45	45	1	1	80	1	sub-11	0.269714	FALSE	1.56426	1.62935	0.86466	0	0	3	0.40678	1.29768	1.72594	0.000198112
1374	1	2	175	75	(2073.5508146630746, 'Miss', 'Miss')	396	2076.85	1	2077.85	2081.29	right	0.437577	45	315	0	1	20	0	sub-11	0	FALSE	-0.754184	-4.31902	2.55082	0	0	2	0.101124	3.30581	1.73457	0.000184831
1375	1	2	176	76	(2084.286322632157, 'Miss', 'Miss')	384	2087.49	0	2088.49	2092.04	left	0.553404	0	315	1	1	80	1	sub-11	0	FALSE	6.77768	6.31122	-2.19071	0	0	0	0.385475	1.37529	1.73254	0.000186707
1376	1	2	177	77	(2095.0385333373633, 'Miss', 'Miss')	396	2098.34	0	2099.34	2102.86	left	0.520574	0	315	1	1	80	1	sub-11	0	FALSE	-7.98892	-12.7038	9.63972	0	0	0	0.388889	1.36257	1.73046	0.000140106
1377	1	2	178	78	(2105.8574412441376, 'Miss', 'Miss')	408	2109.26	1	2110.26	2113.99	right	0.736995	45	315	0	1	20	0	sub-11	1	TRUE	1.4078	3.38565	-0.197096	0	0	2	0.104972	3.25192	1.73864	0.000173637
1378	1	2	179	79	(2116.993073886588, 'Miss', 'Miss')	360	2119.99	1	2120.99	2125.16	right	1.17082	45	45	1	1	80	1	sub-11	0.422286	TRUE	1.85505	-3.31641	4.7944	0	0	3	0.401099	1.31797	1.73631	0.000170876
1379	1	2	180	80	(2128.1620223940445, 'Miss', 'Miss')	336	2130.96	1	2131.96	2135.65	right	0.68733	45	45	1	1	80	1	sub-11	0	FALSE	-6.31112	2.32796	-3.48036	0	0	3	0.404372	1.30625	1.73394	0.000127031
1380	1	2	181	81	(2138.6475191968966, 'Miss', 'Miss')	336	2141.45	1	2142.45	2146.02	left	0.571274	0	315	1	1	80	1	sub-11	0	FALSE	-1.99442	5.76859	4.07094	0	0	0	0.38587	1.37381	1.73196	2.21987e-05
1381	1	2	182	82	(2149.0162596934642, 'Miss', 'Miss')	348	2151.92	1	2152.92	2156.6	left	0.686778	0	315	1	1	80	1	sub-11	0	FALSE	-4.31304	2.09242	-0.326235	0	0	0	0.389189	1.36146	1.72993	0.000132463
1382	1	2	183	83	(2159.6018056277244, 'Miss', 'Miss')	324	2162.3	1	2163.3	2167.04	left	0.736664	0	315	1	1	80	1	sub-11	0	FALSE	-1.71549	-9.30107	-0.234005	0	0	0	0.392473	1.34933	1.72787	0.000129241
1383	1	2	184	84	(2170.037270790617, 'Miss', 'Miss')	324	2172.74	0	2173.74	2177.36	right	0.6216	45	315	0	1	20	0	sub-11	0	FALSE	-4.5617	-9.82157	9.13723	0	0	2	0.106952	3.22497	1.73566	0.00015883
1384	1	2	185	85	(2180.356012105578, 'Miss', 'Miss')	396	2183.66	0	2184.66	2188.69	left	1.03815	0	45	0	1	20	0	sub-11	0.130857	FALSE	-0.00632753	-0.419816	-2.64672	0	0	1	0.0957447	3.38466	1.7442	0.000314594
1385	1	2	186	86	(2191.6916933523353, 'Miss', 'Miss')	324	2194.39	0	2195.39	2198.94	left	0.554988	0	315	1	1	80	1	sub-11	0	FALSE	-5.21441	-10.7548	3.24982	0	0	0	0.391534	1.35279	1.74211	0.000177702
1386	1	2	187	87	(2201.943813201895, 'Miss', 'Miss')	408	2205.34	1	2206.34	2209.85	right	0.503082	45	45	1	1	80	1	sub-11	0	FALSE	-0.720281	-3.96544	5.47648	0	0	3	0.394737	1.34104	1.73998	2.1292e-05
1387	1	2	188	88	(2212.84601978739, 'Miss', 'Miss')	372	2215.95	1	2216.95	2220.71	right	0.770317	45	45	1	1	80	1	sub-11	0	FALSE	2.12228	-5.19201	0.0377478	0	0	3	0.397906	1.3295	1.73781	0.000119798
1388	1	2	189	89	(2223.714935475844, 'Miss', 'Miss')	384	2226.92	1	2227.92	2231.42	left	0.504733	0	315	1	1	80	1	sub-11	0	FALSE	4.66277	6.95109	-5.56475	0	0	0	0.390625	1.35614	1.7358	2.05765e-05
1389	1	2	190	90	(2234.417123141171, 'Miss', 'Miss')	312	2237.02	1	2238.02	2241.45	left	0.438086	0	315	1	1	80	1	sub-11	0	FALSE	-4.89786	-5.98035	5.07148	0	0	0	0.393782	1.34453	1.73376	0.000119372
1390	1	2	191	91	(2244.4524472628036, 'Miss', 'Miss')	324	2247.15	1	2248.15	2252.67	right	1.52101	45	45	1	1	80	1	sub-11	0.222286	FALSE	2.54028	-11.5957	-0.266378	0	0	3	0.396907	1.33313	1.73167	1.98927e-05
1391	1	2	192	92	(2255.6714823397415, 'Miss', 'Miss')	336	2258.47	1	2259.47	2262.82	left	0.353451	0	315	1	1	80	1	sub-11	0	FALSE	-7.71284	0.87457	4.03327	0	0	0	0.394872	1.34054	1.72965	1.95582e-05
1392	1	2	193	93	(2265.8234909154053, 'Miss', 'Miss')	336	2268.62	0	2269.62	2273.01	right	0.387791	45	45	1	1	80	1	sub-11	0.119429	FALSE	2.36031	8.0678	-4.01865	0	0	3	0.397959	1.32931	1.72759	1.9239e-05
1393	1	2	194	94	(2276.008940750744, 'Miss', 'Miss')	336	2278.81	0	2279.81	2283.64	right	0.836734	45	45	1	1	80	1	sub-11	0	FALSE	1.80368	-4.11133	-1.62571	0	0	3	0.401015	1.31827	1.72549	0.000111154
1394	1	2	195	95	(2286.644516660428, 'Miss', 'Miss')	408	2290.04	1	2291.05	2294.8	left	0.754429	0	45	0	1	20	0	sub-11	0	FALSE	4.40842	5.79567	-3.09209	0	0	1	0.0959596	3.38143	1.73365	0.000159859
1395	1	2	196	96	(2297.796750780042, 'Miss', 'Miss')	360	2300.8	0	2301.8	2305.1	left	0.304652	0	315	1	1	80	1	sub-11	0.176571	FALSE	-5.7687	-0.788314	-2.10988	0	0	0	0.39196	1.35122	1.73171	0.000160008
1396	1	2	197	97	(2308.0988989404977, 'Miss', 'Miss')	396	2311.4	0	2312.4	2315.95	right	0.553836	45	45	1	1	80	1	sub-11	0	FALSE	-6.26063	0.814619	2.70166	0	0	3	0.4	1.32193	1.72964	1.85929e-05
1397	1	2	198	98	(2318.951084428063, 'Miss', 'Miss')	324	2321.65	0	2322.65	2326.34	left	0.687108	0	315	1	1	80	1	sub-11	0	FALSE	-0.23693	4.07955	-9.62916	0	0	0	0.393035	1.34727	1.72772	1.82827e-05
1398	1	2	199	99	(2329.3365115702945, 'Miss', 'Miss')	372	2332.44	0	2333.44	2336.87	left	0.436986	0	45	0	1	20	0	sub-11	0	FALSE	0.357982	4.51194	4.9889	0	0	1	0.0990099	3.33628	1.73549	0.000149092
1399	1	2	200	100	(2339.87206470365, 'Miss', 'Miss')	372	2342.97	0	2343.97	2347.34	left	0.370861	0	315	1	1	80	1	sub-11	0.313143	FALSE	-4.7137	-4.77541	2.14452	0	0	0	0.394089	1.34341	1.73354	0.000148153
1400	1	1	1	1	(79.33719319572992, 'Miss', 'Miss')	408	82.7354	1	83.7355	87.4363	left	0.70322	0	315	1	1	80	1	sub-12	0.346857	FALSE	4.42677	0.412856	6.64214	0	0	0	0.25	2	1.92193	0.0780719
1401	1	1	2	2	(90.43727866939662, 'Miss', 'Miss')	324	93.1375	0	94.1377	97.9552	left	0.82036	0	315	1	1	80	1	sub-12	0.180571	FALSE	0.00381804	3.10225	-1.65881	0	0	0	0.4	1.32193	1.79248	0.207519
1402	1	1	3	3	(100.95614737646247, 'Miss', 'Miss')	312	103.556	1	104.557	108.207	left	0.653972	45	45	1	1	80	0	sub-12	0.328571	FALSE	-2.39415	0.11724	0.336911	0	0	3	0.166667	2.58496	1.84237	0.0509857
1403	1	1	4	4	(111.20831521999935, 'Miss', 'Miss')	312	113.808	0	114.809	119.776	left	1.97024	45	45	1	1	80	0	sub-12	0.354286	FALSE	2.68915	9.85061	-6.07334	0	0	3	0.285714	1.80735	1.81128	0.179323
1404	1	1	5	5	(122.77734484559915, 'Miss', 'Miss')	324	125.478	0	126.478	130.562	right	1.08755	0	315	1	1	80	0	sub-12	0.109143	FALSE	-10.8073	-5.89072	-9.1056	0	0	0	0.375	1.41504	1.75272	0.0168785
1405	1	1	6	6	(133.56292606791249, 'Miss', 'Miss')	372	136.663	1	137.663	141.364	left	0.704266	0	315	1	1	80	1	sub-12	0	FALSE	5.62322	8.16299	-5.80863	0	0	0	0.444444	1.16993	1.68548	0.0465547
1406	1	1	7	7	(144.36513040629143, 'Miss', 'Miss')	372	147.465	1	148.466	151.816	right	0.354465	45	315	0	1	20	0	sub-12	0.155429	FALSE	4.58818	5.5655	0.743362	0	0	2	0.1	3.32193	1.78993	0.0386425
1407	1	1	8	8	(154.81731162155847, 'Miss', 'Miss')	396	158.118	0	159.118	162.952	right	0.836542	45	45	1	1	80	1	sub-12	0.101143	FALSE	-0.21595	2.64353	-4.6154	0	0	3	0.272727	1.87447	1.78416	0.0419781
1408	1	1	9	9	(165.95292872838763, 'Miss', 'Miss')	396	169.253	1	170.254	173.454	left	0.204291	0	315	1	1	80	1	sub-12	0.182286	FALSE	-3.53073	-15.9489	-1.90383	0	0	0	0.416667	1.26303	1.73815	0.00809624
1409	1	1	10	10	(176.455104963934, 'Miss', 'Miss')	360	179.455	1	180.456	184.023	right	0.571576	45	45	1	1	80	1	sub-12	0.193143	FALSE	-4.57779	4.64696	-0.594834	0	0	3	0.307692	1.70044	1.7274	0.00531093
1410	1	1	11	11	(187.0239032197278, 'Miss', 'Miss')	300	189.524	1	190.524	193.575	right	0.0533066	45	45	1	1	80	1	sub-12	0.226286	FALSE	-10.2166	-20.731	4.30219	0	0	3	0.357143	1.48543	1.70559	0.0275341
1411	1	1	12	12	(196.57596933267996, 'Miss', 'Miss')	408	199.976	0	200.977	204.411	right	0.436517	45	45	1	1	80	1	sub-12	0.180571	FALSE	-3.79666	3.04416	6.99873	0	0	3	0.4	1.32193	1.67742	0.0197292
1412	1	1	13	13	(207.41156887870602, 'Miss', 'Miss')	372	210.512	1	211.512	214.563	left	0.0534334	0	315	1	1	80	1	sub-12	0.217143	FALSE	-8.27528	-2.34635	0.173832	0	0	0	0.375	1.41504	1.65788	0.00257445
1413	1	1	14	14	(217.5636451452956, 'Miss', 'Miss')	312	220.164	1	221.164	243.844	left	19.6828	0	315	1	1	80	1	sub-12	0.305714	FALSE	2.0143	-1.23956	1.15108	1	1	0	0.411765	1.28011	1.63373	0.0145361
1414	1	1	15	15	(246.84491703561434, 'Miss', 'Miss')	336	249.645	0	250.645	254.963	left	1.32089	45	45	1	1	80	0	sub-12	0.338857	FALSE	-4.24368	-14.1485	3.24334	0	0	3	0.388889	1.36257	1.61635	0.00176276
1415	1	1	16	16	(257.9638566517024, 'Miss', 'Miss')	384	261.164	1	262.164	265.448	left	0.286394	0	315	1	1	80	1	sub-12	0.443429	TRUE	-0.890122	-8.88046	0.96501	0	0	0	0.421053	1.24793	1.59546	0.00152119
1416	1	1	17	17	(268.4491770142704, 'Miss', 'Miss')	372	271.55	0	272.55	276.634	right	1.08826	0	315	1	1	80	0	sub-12	0.386286	FALSE	4.44715	3.09083	-1.6071	0	0	0	0.45	1.152	1.57235	0.00890918
1417	1	1	18	18	(279.634864322692, 'Miss', 'Miss')	408	283.035	0	284.035	287.436	right	0.404899	45	45	1	1	80	1	sub-12	0.427429	TRUE	0.985289	13.0093	-8.97468	0	0	3	0.380952	1.39232	1.56177	0.00110356
1418	1	1	19	19	(290.4371022291125, 'Miss', 'Miss')	384	293.637	0	294.638	298.488	right	0.854095	0	315	1	1	80	0	sub-12	0.170286	FALSE	-2.778	8.87471	-5.59143	0	0	0	0.454545	1.1375	1.54169	0.00101041
1419	1	1	20	20	(301.48937183097587, 'Miss', 'Miss')	360	304.49	1	305.49	308.841	right	0.354265	45	45	1	1	80	1	sub-12	0.261714	FALSE	2.17408	2.72611	-3.16954	0	0	3	0.391304	1.35364	1.53192	0.000826189
1420	1	1	21	21	(311.84150918585146, 'Miss', 'Miss')	372	314.942	1	315.942	319.226	left	0.286556	0	315	1	1	80	1	sub-12	0.217143	FALSE	4.68417	-2.55037	-2.79321	0	0	0	0.458333	1.12553	1.5143	0.000761827
1421	1	1	22	22	(322.2269679541714, 'Miss', 'Miss')	360	325.227	1	326.227	329.378	right	0.154513	45	45	1	1	80	1	sub-12	0.390286	FALSE	4.72825	0.619718	0.470056	0	0	3	0.4	1.32193	1.50531	0.000634681
1422	1	1	23	23	(332.379124118248, 'Miss', 'Miss')	396	335.679	1	336.68	339.997	right	0.319698	45	45	1	1	80	1	sub-12	0.26	FALSE	-4.01944	-14.3603	-5.13413	0	0	3	0.423077	1.24101	1.49418	0.00587287
1423	1	1	24	24	(342.9979304331464, 'Miss', 'Miss')	384	346.198	0	347.198	351.333	right	1.13725	45	315	0	1	20	0	sub-12	0.110286	FALSE	12.3013	21.776	-16.1946	0	0	2	0.0740741	3.75489	1.56471	0.0095583
1424	1	1	25	25	(354.33354232444617, 'Miss', 'Miss')	312	356.934	1	357.934	361.401	left	0.47009	0	315	1	1	80	1	sub-12	0.274286	FALSE	2.08311	1.1296	-1.35536	0	0	0	0.428571	1.22239	1.55177	0.00918552
1425	1	1	26	26	(364.4023285123876, 'Miss', 'Miss')	348	367.303	0	368.303	372.554	right	1.25364	0	315	1	1	80	0	sub-12	0.222857	FALSE	-4.08881	3.08361	-0.562621	0	0	0	0.448276	1.15754	1.53764	0.00424746
1426	1	1	27	27	(375.5546281035531, 'Miss', 'Miss')	360	378.555	0	379.555	383.539	right	0.986728	0	45	0	1	20	1	sub-12	0.230286	FALSE	-4.90633	4.37388	1.53107	0	0	1	0.0333333	4.90689	1.62912	0.0165851
1427	1	1	28	28	(386.5402623689224, 'Miss', 'Miss')	348	389.441	1	390.441	393.758	right	0.320566	45	45	1	1	80	1	sub-12	0.234286	FALSE	-3.01148	-0.683707	-8.03593	0	0	3	0.387097	1.36923	1.61989	0.0163032
1428	1	1	29	29	(396.7590621921481, 'Miss', 'Miss')	336	399.559	0	400.559	404.21	left	0.654155	0	315	1	1	80	1	sub-12	0.194857	FALSE	4.14836	1.8204	6.1771	0	0	0	0.4375	1.19265	1.60609	0.000536704
1429	1	1	30	30	(407.211160735711, 'Miss', 'Miss')	384	410.412	0	411.412	414.796	right	0.386318	0	45	0	1	20	1	sub-12	0.300571	FALSE	1.0788	11.7241	-6.31313	0	0	1	0.0606061	4.04439	1.66926	0.00806429
1430	1	1	31	31	(417.79666505669593, 'Miss', 'Miss')	300	420.297	0	421.297	424.598	right	0.303368	45	45	1	1	80	1	sub-12	0.181143	FALSE	-10.3513	-5.08999	12.1072	0	0	3	0.382353	1.38702	1.66025	0.00801683
1431	1	1	32	32	(427.5987096000972, 'Miss', 'Miss')	312	430.199	0	431.199	435.4	left	1.20377	0	315	1	1	80	1	sub-12	0.267429	FALSE	4.97588	4.45812	-6.46877	0	0	0	0.428571	1.22239	1.64735	0.000497932
1432	1	1	33	33	(438.40095028073483, 'Miss', 'Miss')	324	441.101	0	442.101	445.385	right	0.286877	0	315	1	1	80	0	sub-12	0.297143	FALSE	-2.30914	5.62326	0.279444	0	0	0	0.444444	1.16993	1.63379	0.00279528
1433	1	1	34	34	(448.38631683403946, 'Miss', 'Miss')	372	451.487	1	452.487	456.071	right	0.586762	45	45	1	1	80	1	sub-12	0.718286	TRUE	-5.5493	-4.18169	-0.839976	0	0	3	0.378378	1.4021	1.62687	0.000415999
1434	1	1	35	35	(459.0718730606459, 'Miss', 'Miss')	324	461.772	0	462.772	465.923	left	0.153829	0	315	1	1	80	1	sub-12	0.299429	FALSE	1.70883	-7.803	4.49216	0	0	0	0.447368	1.16046	1.61433	0.000393557
1435	1	1	36	36	(468.92388016597397, 'Miss', 'Miss')	336	471.724	0	472.724	476.025	right	0.303198	0	315	1	1	80	0	sub-12	0.172	FALSE	7.0677	9.35184	-2.7502	0	0	0	0.461538	1.11548	1.60133	0.00222014
1436	1	1	37	37	(479.0260332645412, 'Miss', 'Miss')	312	481.626	0	482.626	486.152	left	0.528531	0	315	1	1	80	1	sub-12	0.386857	FALSE	-7.03354	-2.34982	-0.768014	0	0	0	0.475	1.074	1.588	0.00199806
1437	1	1	38	38	(489.1530960692362, 'Miss', 'Miss')	396	492.453	0	493.454	496.904	right	0.453678	45	45	1	1	80	1	sub-12	0.293714	FALSE	-0.188622	2.99554	-9.3015	0	0	3	0.365854	1.45066	1.58402	0.000319294
1438	1	1	39	39	(499.9052754257791, 'Miss', 'Miss')	324	502.606	1	503.606	506.94	left	0.33701	0	315	1	1	80	1	sub-12	0.243429	FALSE	-1.04743	-2.51048	-0.891635	0	0	0	0.47619	1.07039	1.57165	0.000308793
1439	1	1	40	40	(509.9407282711436, 'Miss', 'Miss')	372	513.041	0	514.041	517.475	right	0.43689	45	315	0	1	20	0	sub-12	0.276571	FALSE	9.37898	9.09756	-2.96952	0	0	2	0.0697674	3.8413	1.61867	0.00421139
1440	1	1	41	41	(520.4762422880194, 'Miss', 'Miss')	300	522.976	1	523.977	528.144	left	1.16994	0	315	1	1	80	1	sub-12	0.306286	FALSE	1.18291	9.37686	-4.77598	0	0	0	0.477273	1.06711	1.60602	0.00411527
1441	1	1	42	42	(531.1450716428008, 'Miss', 'Miss')	336	533.945	1	534.946	538.513	right	0.570436	45	45	1	1	80	1	sub-12	0.257714	FALSE	-13.9951	-4.17161	4.63755	0	0	3	0.355556	1.49185	1.60293	0.00029098
1442	1	1	43	43	(541.5138923142767, 'Miss', 'Miss')	348	544.414	0	545.414	548.715	right	0.303991	45	45	1	1	80	1	sub-12	0.232	FALSE	2.58394	3.07942	-3.54754	0	0	3	0.369565	1.4361	1.59882	0.0023419
1443	1	1	44	44	(551.7159930078597, 'Miss', 'Miss')	324	554.416	0	555.416	560.184	right	1.77033	0	45	0	1	20	1	sub-12	0.314857	FALSE	-0.111792	-10.9833	-0.0393886	0	0	1	0.0638298	3.96963	1.644	0.00410922
1444	1	1	45	45	(563.184993476425, 'Miss', 'Miss')	324	565.885	0	566.885	571.303	right	1.42059	0	315	1	1	80	0	sub-12	0.213714	FALSE	2.16576	7.45274	3.07994	0	0	0	0.458333	1.12553	1.63307	0.00386161
1445	1	1	46	46	(574.303939473215, 'Miss', 'Miss')	348	577.204	0	578.204	582.305	right	1.10505	0	315	1	1	80	0	sub-12	0	FALSE	2.37823	3.06713	-2.09773	0	0	0	0.469388	1.09115	1.6219	0.00136113
1446	1	1	47	47	(585.3062096160502, 'Miss', 'Miss')	336	588.107	1	589.107	592.491	left	0.388153	0	315	1	1	80	1	sub-12	0.156571	FALSE	-7.83692	-2.69761	-2.6461	0	0	0	0.48	1.05889	1.61056	0.00125226
1447	1	1	48	48	(595.4916966259116, 'Miss', 'Miss')	360	598.492	0	599.492	603.243	right	0.753057	0	315	1	1	80	0	sub-12	0.241714	FALSE	-3.91319	-7.6364	7.1411	0	0	0	0.490196	1.02857	1.59909	0.00115508
1448	1	1	49	49	(606.2438793115143, 'Miss', 'Miss')	408	609.644	0	610.644	614.445	right	0.804129	45	315	0	1	20	0	sub-12	0.436571	TRUE	5.09015	0.754366	0.975699	0	0	2	0.0769231	3.70044	1.63585	0.00263342
1449	1	1	50	50	(617.4462166459198, 'Miss', 'Miss')	312	620.046	0	621.047	624.681	right	0.637415	45	45	1	1	80	1	sub-12	0.430857	TRUE	6.39041	4.81853	-10.4867	0	0	3	0.339623	1.558	1.63393	0.0028057
1450	1	1	51	51	(627.6816565079389, 'Miss', 'Miss')	324	630.382	0	631.382	635.416	right	1.0373	0	315	1	1	80	0	sub-12	0.186286	FALSE	14.3605	7.0039	-9.59193	0	0	0	0.481481	1.05445	1.62314	0.000235976
1451	1	1	52	52	(638.4171741867867, 'Miss', 'Miss')	324	641.117	1	642.118	645.485	right	0.370152	45	45	1	1	80	1	sub-12	0.182286	FALSE	3.95378	-6.55975	2.5223	0	0	3	0.345455	1.53343	1.6211	0.000212969
1452	1	1	53	53	(648.4859664780088, 'Miss', 'Miss')	300	650.986	0	651.986	655.945	right	0.961857	45	45	1	1	80	1	sub-12	0.348	FALSE	-3.09151	-2.74137	4.42722	0	0	3	0.357143	1.48543	1.61832	0.00166598
1453	1	1	54	54	(658.9463965539762, 'Miss', 'Miss')	408	662.347	0	663.347	667.365	left	1.02159	45	45	1	1	80	0	sub-12	0.171429	FALSE	5.70048	-8.2771	7.7875	0	0	3	0.368421	1.44057	1.61489	0.00153044
1454	1	1	55	55	(670.3654577640518, 'Miss', 'Miss')	360	673.366	1	674.366	677.55	left	0.187028	0	315	1	1	80	1	sub-12	0.265143	FALSE	-7.16215	-3.56963	-3.29483	0	0	0	0.465517	1.10309	1.60598	0.00017239
1455	1	1	56	56	(680.5508695925964, 'Miss', 'Miss')	348	683.451	1	684.451	687.719	right	0.270073	45	45	1	1	80	1	sub-12	0.134857	FALSE	-4.05117	2.34318	-6.92251	0	0	3	0.372881	1.42321	1.6026	0.000158491
1456	1	1	57	57	(690.7196616341425, 'Miss', 'Miss')	300	693.22	0	694.22	698.004	right	0.786745	45	45	1	1	80	1	sub-12	0.269714	FALSE	9.48819	5.16122	2.64512	0	0	3	0.383333	1.38333	1.59869	0.00129491
1457	1	1	58	58	(701.0050515741059, 'Miss', 'Miss')	348	703.905	1	704.906	708.123	left	0.219688	0	315	1	1	80	1	sub-12	0.202286	FALSE	-2.48657	-0.0607373	2.95603	0	0	0	0.459016	1.12338	1.59081	0.000142175
1458	1	1	59	59	(711.1238141950635, 'Miss', 'Miss')	360	714.124	1	715.124	723.476	left	5.35601	0	315	1	1	80	1	sub-12	0.590857	TRUE	-7.13168	-10.5139	12.5694	0	0	0	0.467742	1.09622	1.58275	0.000855354
1459	1	1	60	60	(726.4771480702948, 'Miss', 'Miss')	372	729.577	0	730.578	735.112	left	1.53704	0	45	0	1	20	0	sub-12	0.22	FALSE	7.92578	7.86072	-0.692348	0	0	1	0.0634921	3.97728	1.61773	0.00227332
1460	1	1	61	61	(738.1128493746473, 'Miss', 'Miss')	384	741.313	1	742.313	746.598	left	1.28672	0	315	1	1	80	1	sub-12	0.355429	FALSE	5.61462	1.36325	-10.404	0	0	0	0.46875	1.09311	1.60947	0.002237
1461	1	1	62	62	(749.5983689260902, 'Miss', 'Miss')	372	752.699	1	753.699	756.916	left	0.220439	0	315	1	1	80	1	sub-12	0.229714	FALSE	3.8343	1.88883	-2.74543	0	0	0	0.476923	1.06817	1.60109	0.000749834
1462	1	1	63	63	(759.917154628547, 'Miss', 'Miss')	360	762.917	1	763.918	767.218	right	0.30316	45	45	1	1	80	1	sub-12	0.376571	FALSE	6.95426	14.6928	-8.88213	0	0	3	0.363636	1.45943	1.59869	0.000130269
1463	1	1	64	64	(770.2192805952582, 'Miss', 'Miss')	324	772.92	0	773.92	777.387	right	0.47152	45	45	1	1	80	1	sub-12	0.166857	FALSE	7.29674	14.8153	-4.68504	0	0	3	0.373134	1.42223	1.59583	0.00108433
1464	1	1	65	65	(780.3880485011032, 'Miss', 'Miss')	396	783.688	1	784.689	788.089	left	0.40401	0	315	1	1	80	1	sub-12	0.26	FALSE	10.9879	14.2358	-13.7876	0	0	0	0.470588	1.08746	1.5883	0.000118033
1465	1	1	66	66	(791.0902350567412, 'Miss', 'Miss')	300	793.59	0	794.591	798.208	right	0.620396	45	315	0	1	20	0	sub-12	0.290286	FALSE	-4.76526	-4.58877	1.91765	0	0	2	0.0724638	3.7866	1.61791	0.00165429
1466	1	1	67	67	(801.2090123810594, 'Miss', 'Miss')	396	804.509	1	805.51	808.96	left	0.453865	0	315	1	1	80	1	sub-12	0.322857	FALSE	4.11489	-19.1739	2.68146	0	0	0	0.471429	1.08489	1.61025	0.00163006
1467	1	1	68	68	(811.9611970086153, 'Miss', 'Miss')	396	815.262	1	816.262	819.596	right	0.338014	45	315	0	1	20	0	sub-12	0.251429	FALSE	6.75172	8.17256	-6.78669	0	0	2	0.084507	3.56478	1.63595	0.00131751
1468	1	1	69	69	(822.5967096661261, 'Miss', 'Miss')	336	825.397	0	826.397	829.581	right	0.18701	45	45	1	1	80	1	sub-12	0.446857	TRUE	-3.80341	-3.7605	2.92126	0	0	3	0.361111	1.46949	1.63343	0.00138608
1469	1	1	70	70	(832.5821056261411, 'Miss', 'Miss')	396	835.882	1	836.883	840.167	left	0.287909	0	45	0	1	20	0	sub-12	0.890286	TRUE	0.790464	0.501417	4.0286	0	0	1	0.0684932	3.8679	1.66193	0.00166483
1470	1	1	71	71	(843.1676440700103, 'Miss', 'Miss')	348	846.068	1	847.068	851.019	right	0.954922	0	45	0	1	20	1	sub-12	0.301714	FALSE	11.0348	2.46727	-5.90271	0	0	1	0.0810811	3.62449	1.6867	0.00631237
1471	1	1	72	72	(854.0198561900725, 'Miss', 'Miss')	408	857.42	1	858.42	861.904	right	0.487917	45	45	1	1	80	1	sub-12	0.338857	FALSE	1.85878	-1.89944	4.78306	0	0	3	0.36	1.47393	1.68368	0.00133947
1472	1	1	73	73	(864.9053936074779, 'Miss', 'Miss')	396	868.206	0	869.206	872.59	right	0.387739	45	45	1	1	80	1	sub-12	0.455429	TRUE	-11.4085	4.60377	-2.71482	0	0	3	0.368421	1.44057	1.68032	0.000859569
1473	1	1	74	74	(875.5909417888543, 'Miss', 'Miss')	384	878.791	1	879.791	882.975	right	0.186593	0	315	1	1	80	0	sub-12	0.168	FALSE	12.0235	6.3683	-5.19901	0	0	0	0.441558	1.17932	1.67374	0.000113272
1474	1	1	75	75	(885.9763877957703, 'Miss', 'Miss')	348	888.877	1	889.877	893.244	right	0.370619	45	45	1	1	80	1	sub-12	0.262286	FALSE	4.80413	1.69193	-10.6978	0	0	3	0.371795	1.42742	1.67043	0.000106984
1475	1	1	76	76	(896.2452023362239, 'Miss', 'Miss')	408	899.646	1	900.646	904.88	left	1.23705	0	315	1	1	80	1	sub-12	0.273143	FALSE	-4.17611	2.39749	-1.3256	0	0	0	0.443038	1.1745	1.66409	0.000104117
1476	1	1	77	77	(907.880908911593, 'Miss', 'Miss')	372	910.981	0	911.981	915.882	right	0.903839	0	315	1	1	80	0	sub-12	0.226857	FALSE	2.65726	5.79516	0.961321	0	0	0	0.45	1.152	1.65763	0.000551769
1477	1	1	78	78	(918.8831410476378, 'Miss', 'Miss')	336	921.683	1	922.684	926.118	right	0.437005	45	45	1	1	80	1	sub-12	0.250857	FALSE	6.83649	6.84713	-5.16603	0	0	3	0.37037	1.43296	1.65471	9.59273e-05
1478	1	1	79	79	(929.1185861806734, 'Miss', 'Miss')	312	931.719	1	932.719	937.187	left	1.46991	0	45	0	1	20	0	sub-12	0.287429	FALSE	1.6835	6.4942	-2.19577	0	0	1	0.0853659	3.5502	1.67647	0.00104717
1479	1	1	80	80	(940.1875435378861, 'Miss', 'Miss')	396	943.488	1	944.488	948.406	left	0.920227	0	45	0	1	20	0	sub-12	0.38	FALSE	-1.36412	1.94129	-1.94223	0	0	1	0.0963855	3.37504	1.69576	0.00408138
1480	1	1	81	81	(951.4064826268732, 'Miss', 'Miss')	360	954.407	1	955.407	958.658	right	0.25369	45	315	0	1	20	0	sub-12	0.199429	FALSE	4.17972	5.39347	-1.28972	0	0	2	0.0833333	3.58496	1.71693	0.00177186
1481	1	1	82	82	(961.6585855537014, 'Miss', 'Miss')	336	964.459	0	965.459	970.31	right	1.85399	0	315	1	1	80	0	sub-12	0.153714	FALSE	17.4365	18.3527	-17.6814	0	0	0	0.435294	1.19994	1.71079	0.000973345
1482	1	1	83	83	(973.3110106782442, 'Miss', 'Miss')	348	976.211	1	977.211	980.445	right	0.238023	45	45	1	1	80	1	sub-12	0.268	FALSE	0.865285	4.15909	0.161011	0	0	3	0.360465	1.47207	1.70788	9.95746e-05
1483	1	1	84	84	(983.4463986346382, 'Miss', 'Miss')	360	986.447	0	987.447	990.948	right	0.503961	45	45	1	1	80	1	sub-12	0.36	FALSE	12.6104	13.2773	-12.3163	0	0	3	0.367816	1.44294	1.70471	0.000657314
1484	1	1	85	85	(993.9485804186224, 'Miss', 'Miss')	384	997.149	0	998.149	1001.43	right	0.28816	0	315	1	1	80	0	sub-12	0.281714	FALSE	-1.37755	-2.39265	4.88039	0	0	0	0.431818	1.2115	1.69905	9.23059e-05
1485	1	1	86	86	(1004.4340694536622, 'Miss', 'Miss')	360	1007.43	1	1008.43	1012.34	right	0.905121	45	45	1	1	80	1	sub-12	0.242286	FALSE	0.78153	-2.10194	1.4413	0	0	3	0.370787	1.43134	1.69592	8.79674e-05
1486	1	1	87	87	(1015.3362838069697, 'Miss', 'Miss')	384	1018.54	1	1019.54	1041.97	right	19.4331	45	45	1	1	80	1	sub-12	0.276571	FALSE	-2.0873	-2.07976	9.30386	1	1	3	0.377778	1.40439	1.69258	0.000588367
1487	1	1	88	88	(1044.967545807198, 'Miss', 'Miss')	300	1047.47	0	1048.47	1052.49	right	1.02037	0	45	0	1	20	1	sub-12	0.385714	FALSE	-1.31387	4.64921	1.01883	0	0	1	0.0989011	3.33787	1.7097	0.000723065
1488	1	1	89	89	(1055.4863887140345, 'Miss', 'Miss')	324	1058.19	1	1059.19	1062.34	right	0.154123	45	45	1	1	80	1	sub-12	0.306857	FALSE	-7.41958	-8.87746	4.9997	0	0	3	0.380435	1.39428	1.70618	0.000712629
1489	1	1	90	90	(1065.3381552946375, 'Miss', 'Miss')	312	1067.94	0	1068.94	1072.61	right	0.670525	45	315	0	1	20	0	sub-12	0.568	TRUE	-5.40775	-4.65401	-0.666201	0	0	2	0.0860215	3.53916	1.72484	0.000807535
1490	1	1	91	91	(1075.6069812093847, 'Miss', 'Miss')	348	1078.51	1	1079.51	1083.16	right	0.654057	45	315	0	1	20	0	sub-12	0.319429	FALSE	-3.25687	-6.86844	1.77027	0	0	2	0.0957447	3.38466	1.74158	0.00319037
1491	1	1	92	92	(1086.1591266649812, 'Miss', 'Miss')	300	1088.66	0	1089.66	1094.08	right	1.42032	0	315	1	1	80	0	sub-12	0.161143	FALSE	8.15666	17.4664	-20.5871	0	0	0	0.410526	1.28445	1.7367	0.000679122
1492	1	1	93	93	(1097.0780409801955, 'Miss', 'Miss')	384	1100.28	1	1101.28	1104.7	left	0.419694	0	45	0	1	20	0	sub-12	0.16	FALSE	6.15517	12.5348	-2.97871	0	0	1	0.104167	3.26303	1.75179	0.000598166
1493	1	1	94	94	(1107.6969260828955, 'Miss', 'Miss')	360	1110.7	1	1111.7	1115.11	right	0.421298	45	315	0	1	20	0	sub-12	0.226286	FALSE	5.14703	9.7357	-0.999557	0	0	2	0.103093	3.27798	1.76673	0.00112079
1494	1	1	95	95	(1118.115679354738, 'Miss', 'Miss')	324	1120.82	0	1121.82	1125.37	right	0.553932	45	45	1	1	80	1	sub-12	0.251429	FALSE	1.46777	1.66932	1.70602	0	0	3	0.367347	1.44478	1.76335	0.000607618
1495	1	1	96	96	(1128.3677919913316, 'Miss', 'Miss')	336	1131.17	0	1132.17	1135.85	right	0.687244	0	315	1	1	80	0	sub-12	0.450857	TRUE	5.34842	6.5111	-5.60568	0	0	0	0.40404	1.30743	1.75869	8.49521e-05
1496	1	1	97	97	(1138.8532241548965, 'Miss', 'Miss')	336	1141.65	1	1142.65	1146.15	right	0.503189	45	45	1	1	80	1	sub-12	0.325143	FALSE	5.12541	-2.76503	3.09584	0	0	3	0.37	1.4344	1.75536	8.17504e-05
1497	1	1	98	98	(1149.1553945091, 'Miss', 'Miss')	396	1152.46	0	1153.46	1156.56	right	0.103323	45	45	1	1	80	1	sub-12	0.770286	TRUE	2.96649	2.10317	-4.36735	0	0	3	0.376238	1.41028	1.75186	0.000470115
1498	1	1	99	99	(1159.557504967932, 'Miss', 'Miss')	324	1162.26	0	1163.26	1198.11	right	31.8518	45	45	1	1	80	1	sub-12	0.390286	FALSE	-2.23691	-5.99219	8.459	1	1	3	0.382353	1.38702	1.74821	0.000449045
1499	1	1	100	100	(1201.1078660463136, 'Miss', 'Miss')	336	1203.91	0	1204.91	1208.04	right	0.136978	45	45	1	1	80	1	sub-12	0.416571	TRUE	-11.0665	-15.284	2.08233	0	0	3	0.38835	1.36457	1.74441	0.000429289
1500	1	2	101	1	(1397.0438870238431, 'Miss', 'Miss')	336	1399.85	1	1400.85	1404.13	left	0.286652	0	315	1	1	80	1	sub-12	0.116571	FALSE	7.0082	-14.3848	2.81618	0	0	0	0.394231	1.34289	1.74049	7.14653e-05
1501	1	2	102	2	(1407.13313002012, 'Miss', 'Miss')	396	1410.43	0	1411.43	1414.85	right	0.421504	0	315	1	1	80	0	sub-12	0.242286	FALSE	11.1776	12.4329	-11.2945	0	0	0	0.4	1.32193	1.73644	0.000393304
1502	1	2	103	3	(1417.8520048859536, 'Miss', 'Miss')	300	1420.35	1	1421.35	1424.99	right	0.637199	45	45	1	1	80	1	sub-12	0.257714	FALSE	1.38095	3.69523	-5.8871	0	0	3	0.386792	1.37037	1.73292	6.71559e-05
1503	1	2	104	4	(1427.987401719849, 'Miss', 'Miss')	372	1431.09	1	1432.09	1435.56	left	0.469995	0	315	1	1	80	1	sub-12	0.232571	FALSE	6.53105	7.64271	-5.69494	0	0	0	0.401869	1.3152	1.72896	6.52633e-05
1504	1	2	105	5	(1438.5562418663394, 'Miss', 'Miss')	300	1441.06	1	1442.06	1445.59	right	0.537714	45	45	1	1	80	1	sub-12	0.264571	FALSE	-0.521663	10.2859	-3.56489	0	0	3	0.388889	1.36257	1.72551	6.31872e-05
1505	1	2	106	6	(1448.5916400595997, 'Miss', 'Miss')	336	1451.39	1	1452.39	1456.13	right	0.737644	45	45	1	1	80	1	sub-12	0.310857	FALSE	-1.15737	-4.33256	2.93743	0	0	3	0.394495	1.34192	1.72193	0.000373467
1506	1	2	107	7	(1459.127133269838, 'Miss', 'Miss')	360	1462.13	1	1463.13	1466.68	right	0.553523	45	45	1	1	80	1	sub-12	0.271429	FALSE	2.56916	5.34727	-5.52259	0	0	3	0.4	1.32193	1.71824	0.000358327
1507	1	2	108	8	(1469.6793331001136, 'Miss', 'Miss')	312	1472.28	0	1473.28	1476.98	right	0.704811	0	45	0	1	20	1	sub-12	0.166286	FALSE	2.37778	-1.3094	-2.25949	0	0	1	0.0990991	3.33498	1.73216	0.000481015
1508	1	2	109	9	(1479.9813625240276, 'Miss', 'Miss')	312	1482.58	1	1483.58	1487.03	right	0.45316	45	315	0	1	20	0	sub-12	0.293143	FALSE	-3.93344	-7.24303	2.4133	0	0	2	0.0982143	3.34792	1.74595	0.00089833
1509	1	2	110	10	(1490.0334104658468, 'Miss', 'Miss')	312	1492.63	1	1493.63	1497.17	right	0.537519	45	45	1	1	80	1	sub-12	0.252571	FALSE	12.1978	15.3748	-11.5661	0	0	3	0.39823	1.32833	1.74221	0.000473488
1510	1	2	111	11	(1500.1687881576363, 'Miss', 'Miss')	348	1503.07	0	1504.07	1507.67	right	0.603408	0	45	0	1	20	1	sub-12	0.338857	FALSE	-2.6316	3.19791	2.74811	0	0	1	0.105263	3.24793	1.75485	0.000426402
1511	1	2	112	12	(1510.6709496898293, 'Miss', 'Miss')	360	1513.67	1	1514.67	1518.19	left	0.520696	0	315	1	1	80	1	sub-12	0.270286	FALSE	-1.38295	1.7947	8.34053	0	0	0	0.382609	1.38606	1.75158	0.000427729
1512	1	2	113	13	(1521.1898086871297, 'Miss', 'Miss')	360	1524.19	1	1525.19	1528.87	right	0.687215	0	315	1	1	80	0	sub-12	0.424571	TRUE	1.32187	-13.7928	5.19771	0	0	0	0.387931	1.36613	1.7482	0.000338968
1513	1	2	114	14	(1531.875252835318, 'Miss', 'Miss')	336	1534.68	0	1535.68	1539.13	right	0.454151	0	315	1	1	80	0	sub-12	0.126286	FALSE	2.53042	7.19851	-6.89178	0	0	0	0.393162	1.3468	1.74472	0.000325916
1514	1	2	115	15	(1542.1274156852633, 'Miss', 'Miss')	396	1545.43	1	1546.43	1549.88	left	0.453299	0	315	1	1	80	1	sub-12	0.504	TRUE	4.52509	-6.52073	4.40019	0	0	0	0.398305	1.32805	1.74114	0.000313563
1515	1	2	116	16	(1552.8794998861158, 'Miss', 'Miss')	384	1556.08	0	1557.08	1560.83	right	0.754503	45	45	1	1	80	1	sub-12	0.46	TRUE	7.91767	13.4097	-16.2239	0	0	3	0.386555	1.37126	1.73798	5.41142e-05
1516	1	2	117	17	(1563.8317980346874, 'Miss', 'Miss')	372	1566.93	1	1567.93	1571.72	right	0.787627	45	45	1	1	80	1	sub-12	0.185714	FALSE	1.82214	3.76356	-0.921251	0	0	3	0.391667	1.3523	1.73472	0.000311767
1517	1	2	118	18	(1574.7173923235714, 'Miss', 'Miss')	336	1577.52	0	1578.52	1582.25	right	0.737444	0	315	1	1	80	0	sub-12	0.350286	FALSE	8.30865	-2.00528	-0.976747	0	0	0	0.396694	1.3339	1.73136	5.12497e-05
1518	1	2	119	19	(1585.25285834647, 'Miss', 'Miss')	396	1588.55	1	1589.55	1593.07	right	0.521272	45	45	1	1	80	1	sub-12	0.357714	FALSE	2.5371	5.20578	-5.8935	0	0	3	0.393443	1.34577	1.72815	4.98673e-05
1519	1	2	120	20	(1596.0717301884033, 'Miss', 'Miss')	408	1599.47	0	1600.47	1604.32	right	0.854784	0	315	1	1	80	0	sub-12	0.198286	FALSE	-7.13966	-11.2852	4.03608	0	0	0	0.398374	1.3278	1.72485	4.85845e-05
1520	1	2	121	21	(1607.324002619971, 'Miss', 'Miss')	336	1610.12	1	1611.12	1614.79	left	0.6699	0	315	1	1	80	1	sub-12	0.425714	TRUE	9.61334	16.9665	-12.5149	0	0	0	0.403226	1.31034	1.72147	0.000278144
1521	1	2	122	22	(1617.7927986286486, 'Miss', 'Miss')	312	1620.39	0	1621.39	1624.86	right	0.470621	45	45	1	1	80	1	sub-12	0.444	TRUE	-7.81942	-0.985794	3.15429	0	0	3	0.392	1.35107	1.71846	4.61015e-05
1522	1	2	123	23	(1627.8615412613653, 'Miss', 'Miss')	348	1630.76	1	1631.76	1635.21	right	0.453211	45	315	0	1	20	0	sub-12	0.121143	FALSE	2.05902	3.31203	6.54108	0	0	2	0.0952381	3.39232	1.73122	0.00039504
1523	1	2	124	24	(1638.2136780613982, 'Miss', 'Miss')	408	1641.61	0	1642.61	1645.9	right	0.286354	45	45	1	1	80	1	sub-12	0.384571	FALSE	-3.64059	4.23784	-10.7096	0	0	3	0.393701	1.34483	1.72813	0.0003911
1524	1	2	125	25	(1648.899199887699, 'Miss', 'Miss')	348	1651.8	0	1652.8	1662.35	right	6.55498	45	45	1	1	80	1	sub-12	0.522857	TRUE	-0.801928	-0.915365	0.27224	0	0	3	0.398438	1.32757	1.72496	0.000266295
1525	1	2	126	26	(1665.352763218525, 'Miss', 'Miss')	300	1667.85	1	1668.85	1672.27	left	0.420975	0	315	1	1	80	1	sub-12	0.321714	FALSE	-3.68479	-5.01922	4.51794	0	0	0	0.395349	1.3388	1.72193	4.36879e-05
1526	1	2	127	27	(1675.2713928989433, 'Miss', 'Miss')	384	1678.47	1	1679.47	1682.77	right	0.304525	45	45	1	1	80	1	sub-12	0.211429	FALSE	-5.22179	-3.79599	11.1641	0	0	3	0.4	1.32193	1.71881	4.26248e-05
1527	1	2	128	28	(1685.773372997257, 'Miss', 'Miss')	336	1688.57	0	1689.57	1692.59	right	0.0199267	45	315	0	1	20	0	sub-12	0.478286	TRUE	2.83845	-12.3411	-4.04956	0	0	2	0.0992366	3.33298	1.73067	0.000347117
1528	1	2	129	29	(1695.5920681214848, 'Miss', 'Miss')	336	1698.39	1	1699.39	1703.06	left	0.669685	0	315	1	1	80	1	sub-12	0.122857	FALSE	6.22158	7.45174	-7.02201	0	0	0	0.393939	1.34395	1.7277	0.000345768
1529	1	2	130	30	(1706.0608491493804, 'Miss', 'Miss')	372	1709.16	1	1710.16	1713.66	left	0.503245	0	45	0	1	20	0	sub-12	0.36	FALSE	-2.44143	4.01541	-14.1126	0	0	1	0.0977444	3.35484	1.73948	0.000344421
1530	1	2	131	31	(1716.6630184771238, 'Miss', 'Miss')	408	1720.06	1	1721.06	1724.33	left	0.270418	0	315	1	1	80	1	sub-12	0.323429	FALSE	-0.717911	12.6871	4.80605	0	0	0	0.395522	1.33817	1.73645	0.00034116
1531	1	2	132	32	(1727.3318456125307, 'Miss', 'Miss')	324	1730.03	0	1731.03	1734.32	right	0.2881	0	315	1	1	80	0	sub-12	0.322286	FALSE	6.20933	8.60728	-9.01273	0	0	0	0.4	1.32193	1.73334	0.000237814
1532	1	2	133	33	(1737.3172596049662, 'Miss', 'Miss')	372	1740.42	1	1741.42	1745.09	right	0.669967	45	45	1	1	80	1	sub-12	0.305143	FALSE	-3.2303	-1.3546	4.31245	0	0	3	0.389706	1.35954	1.73055	4.03914e-05
1533	1	2	134	34	(1748.0860862132722, 'Miss', 'Miss')	360	1751.09	0	1752.09	1755.6	right	0.520574	0	315	1	1	80	0	sub-12	0.286286	FALSE	-6.52227	-7.00422	0.699551	0	0	0	0.40146	1.31667	1.7275	3.94877e-05
1534	1	2	135	35	(1758.6048927778502, 'Miss', 'Miss')	348	1761.51	0	1762.51	1766.86	right	1.35507	0	45	0	1	20	1	sub-12	0.333143	FALSE	4.84751	8.72773	-2.46669	0	0	1	0.101449	3.30117	1.73849	0.00030516
1535	1	2	136	36	(1769.8571738094906, 'Miss', 'Miss')	312	1772.46	1	1773.46	1776.89	left	0.438267	0	315	1	1	80	1	sub-12	0.244	FALSE	-1.98608	-9.23666	1.80398	0	0	0	0.402878	1.31159	1.73539	0.000302407
1536	1	2	137	37	(1779.8925631252569, 'Miss', 'Miss')	396	1783.19	0	1784.19	1787.39	right	0.203111	45	315	0	1	20	0	sub-12	0.337714	FALSE	-5.91505	-17.3723	4.76325	0	0	2	0.1	3.32193	1.74632	0.000301319
1537	1	2	138	38	(1790.3947479608796, 'Miss', 'Miss')	348	1793.3	1	1794.3	1798.58	left	1.28748	0	315	1	1	80	1	sub-12	0.288	FALSE	-0.739968	5.71765	-3.11936	0	0	0	0.404255	1.30666	1.74317	0.000298658
1538	1	2	139	39	(1801.5803648041583, 'Miss', 'Miss')	372	1804.68	0	1805.68	1809.23	right	0.553081	0	315	1	1	80	0	sub-12	0.0988571	FALSE	-0.911314	-8.26143	6.52656	0	0	0	0.408451	1.29177	1.73997	0.000207492
1539	1	2	140	40	(1812.2325907398263, 'Miss', 'Miss')	408	1815.63	0	1816.63	1820.3	right	0.670212	45	45	1	1	80	1	sub-12	0.366286	FALSE	2.39124	4.87908	2.58377	0	0	3	0.377622	1.40498	1.73758	3.76238e-05
1540	1	2	141	41	(1823.3014659801775, 'Miss', 'Miss')	396	1826.6	0	1827.6	1831.17	right	0.571682	45	45	1	1	80	1	sub-12	0.262286	FALSE	0.933483	2.99212	-3.72198	0	0	3	0.381944	1.38857	1.73512	0.000225526
1541	1	2	142	42	(1834.1703550361344, 'Miss', 'Miss')	300	1836.67	0	1837.67	1841.14	right	0.4704	0	315	1	1	80	0	sub-12	0.256571	FALSE	8.23326	5.47951	-13.7609	0	0	0	0.406897	1.29727	1.73207	3.59525e-05
1542	1	2	143	43	(1844.1390929249392, 'Miss', 'Miss')	372	1847.24	0	1848.24	1851.72	right	0.487947	0	45	0	1	20	1	sub-12	0.254857	FALSE	0.564206	-1.93851	8.60523	0	0	1	0.10274	3.28293	1.74233	0.00026806
1543	1	2	144	44	(1854.7245323292118, 'Miss', 'Miss')	312	1857.32	0	1858.32	1863.79	right	2.47084	0	45	0	1	20	1	sub-12	0.629143	TRUE	4.82993	-8.45364	0.959912	0	0	1	0.108844	3.19967	1.75192	0.0011126
1544	1	2	145	45	(1866.7938888964381, 'Miss', 'Miss')	360	1869.79	0	1870.79	1873.83	right	0.0380048	45	45	1	1	80	1	sub-12	0.481143	TRUE	2.38568	9.10674	-1.47248	0	0	3	0.378378	1.4021	1.74951	0.000251264
1545	1	2	146	46	(1876.8290379649006, 'Miss', 'Miss')	348	1879.73	0	1880.73	1884.88	right	1.15403	45	315	0	1	20	0	sub-12	0.281143	FALSE	-4.99764	-11.4035	4.19729	0	0	2	0.100671	3.31228	1.75965	0.00026968
1546	1	2	147	47	(1887.8813208830106, 'Miss', 'Miss')	360	1890.88	0	1891.88	1895.12	right	0.238157	45	315	0	1	20	0	sub-12	0.284	FALSE	8.79432	0.457991	-7.21911	0	0	2	0.106667	3.22882	1.76912	0.00109311
1547	1	2	148	48	(1898.116736331911, 'Miss', 'Miss')	372	1901.22	0	1902.22	1905.43	right	0.221111	45	45	1	1	80	1	sub-12	0.532	TRUE	-4.71559	4.66213	-5.38296	0	0	3	0.377483	1.40551	1.76668	0.000247395
1548	1	2	149	49	(1908.4355300796014, 'Miss', 'Miss')	312	1911.04	0	1912.04	1915.27	right	0.236897	0	315	1	1	80	0	sub-12	0.288571	FALSE	0.693579	2.10755	0.688635	0	0	0	0.394737	1.34104	1.76385	3.60349e-05
1549	1	2	150	50	(1918.2708638555123, 'Miss', 'Miss')	408	1921.67	0	1922.67	1926.01	right	0.336754	45	45	1	1	80	1	sub-12	0.268571	FALSE	0.7788	-2.67066	-4.8952	0	0	3	0.379085	1.39941	1.76143	3.52095e-05
1550	1	2	151	51	(1929.0063751536545, 'Miss', 'Miss')	336	1931.81	0	1932.81	1936.07	right	0.269756	45	45	1	1	80	1	sub-12	0.239429	FALSE	-7.27782	-4.59909	9.38966	0	0	3	0.383117	1.38414	1.75895	0.000196186
1551	1	2	152	52	(1939.0751546834763, 'Miss', 'Miss')	384	1942.28	0	1943.28	1946.59	right	0.321301	0	315	1	1	80	0	sub-12	0.197714	FALSE	-4.63267	-3.01925	0.171005	0	0	0	0.393548	1.34539	1.75625	3.37391e-05
1552	1	2	153	53	(1949.5939537576633, 'Miss', 'Miss')	324	1952.29	0	1953.29	1956.58	right	0.287039	45	45	1	1	80	1	sub-12	0.48	TRUE	-4.44695	-19.4903	3.44468	0	0	3	0.384615	1.37851	1.7538	3.3004e-05
1553	1	2	154	54	(1959.5793117108915, 'Miss', 'Miss')	348	1962.48	1	1963.48	1966.66	left	0.18701	0	315	1	1	80	1	sub-12	0.592	TRUE	7.10326	4.33	-7.31196	0	0	0	0.394904	1.34042	1.75114	3.23497e-05
1554	1	2	155	55	(1969.664664420845, 'Miss', 'Miss')	396	1972.97	1	1973.97	1977.15	right	0.187907	45	45	1	1	80	1	sub-12	0.198857	FALSE	-2.75451	1.36599	2.70221	0	0	3	0.386076	1.37304	1.74872	3.16549e-05
1555	1	2	156	56	(1980.1501809206457, 'Miss', 'Miss')	408	1983.55	1	1984.55	1987.77	right	0.220851	45	45	1	1	80	1	sub-12	0.485143	TRUE	-13.7351	-7.43468	5.25124	0	0	3	0.389937	1.35869	1.74623	0.000178797
1556	1	2	157	57	(1990.7690338424109, 'Miss', 'Miss')	324	1993.47	0	1994.47	1998.49	right	1.02051	0	315	1	1	80	0	sub-12	0.265714	FALSE	-3.83362	-7.83675	1.41124	0	0	0	0.39375	1.34465	1.7437	3.03785e-05
1557	1	2	158	58	(2001.4878801337945, 'Miss', 'Miss')	396	2004.79	0	2005.79	2009.51	right	0.719887	45	45	1	1	80	1	sub-12	0.304571	FALSE	-8.01373	-1.7424	5.51443	0	0	3	0.391304	1.35364	1.74125	2.97574e-05
1558	1	2	159	59	(2012.506808625265, 'Miss', 'Miss')	300	2015.01	0	2016.01	2019.37	right	0.370555	0	315	1	1	80	0	sub-12	0.378857	FALSE	0.218738	-5.66985	5.57024	0	0	0	0.395062	1.33985	1.73874	2.91702e-05
1559	1	2	160	60	(2022.3754027818177, 'Miss', 'Miss')	300	2024.88	1	2025.88	2029.29	right	0.420292	45	315	0	1	20	0	sub-12	0.644571	TRUE	-6.90264	-8.99936	6.09881	0	0	2	0.104294	3.26127	1.7478	0.000214015
1560	1	2	161	61	(2032.2941423212833, 'Miss', 'Miss')	360	2035.29	0	2036.29	2039.55	right	0.25387	0	315	1	1	80	0	sub-12	0.324	FALSE	2.77756	-0.444692	2.42415	0	0	0	0.396341	1.33518	1.74526	0.000212335
1561	1	2	162	62	(2042.546234428657, 'Miss', 'Miss')	384	2045.75	1	2046.75	2050.16	left	0.421098	0	315	1	1	80	1	sub-12	0.758286	TRUE	1.24716	-6.55023	-0.247972	0	0	0	0.4	1.32193	1.74267	0.000159153
1562	1	2	163	63	(2053.1650765309714, 'Miss', 'Miss')	336	2055.97	0	2056.97	2060.18	right	0.220777	0	315	1	1	80	0	sub-12	0.368571	FALSE	-0.133799	-5.91859	3.04413	0	0	0	0.403614	1.30895	1.74003	0.000154886
1563	1	2	164	64	(2063.183865756684, 'Miss', 'Miss')	324	2065.88	0	2066.88	2070.03	right	0.153538	0	315	1	1	80	0	sub-12	0.300571	FALSE	4.07131	1.48897	0.361943	0	0	0	0.407186	1.29624	1.73735	0.000150779
1564	1	2	165	65	(2073.0357654997642, 'Miss', 'Miss')	408	2076.44	0	2077.44	2081.44	right	1.00368	45	45	1	1	80	1	sub-12	0.184571	FALSE	9.37499	6.85156	-4.61777	0	0	3	0.380952	1.39232	1.73527	2.69823e-05
1565	1	2	166	66	(2084.438083192701, 'Miss', 'Miss')	408	2087.84	0	2088.84	2092.29	right	0.454664	45	315	0	1	20	0	sub-12	0.313714	FALSE	7.48697	10.2801	-10.8907	0	0	2	0.106509	3.23095	1.74386	0.000196814
1566	1	2	167	67	(2095.290324442056, 'Miss', 'Miss')	348	2098.19	1	2099.19	2102.84	right	0.654	45	45	1	1	80	1	sub-12	0.496571	TRUE	-5.84506	-5.64398	0.96914	0	0	3	0.382353	1.38702	1.74174	0.000195249
1567	1	2	168	68	(2105.842443542577, 'Miss', 'Miss')	336	2108.64	0	2109.64	2113.39	right	0.753197	0	315	1	1	80	0	sub-12	0.234286	FALSE	-2.36637	-5.16393	5.32199	0	0	0	0.403509	1.30933	1.73919	2.63874e-05
1568	1	2	169	69	(2116.3945962111393, 'Miss', 'Miss')	348	2119.29	0	2120.3	2124.51	right	1.2214	45	45	1	1	80	1	sub-12	0.42	TRUE	3.52411	-10.077	-1.01034	0	0	3	0.383721	1.38187	1.73708	2.5842e-05
1569	1	2	170	70	(2127.5135963051835, 'Miss', 'Miss')	324	2130.21	0	2131.21	2134.76	right	0.553947	45	45	1	1	80	1	sub-12	0.324	FALSE	1.16606	-14.0898	5.57736	0	0	3	0.387283	1.36854	1.73493	0.000152713
1570	1	2	171	71	(2137.7656623349103, 'Miss', 'Miss')	348	2140.67	1	2141.67	2144.9	right	0.23819	45	45	1	1	80	1	sub-12	0.275429	FALSE	-2.41491	-0.931689	1.75409	0	0	3	0.390805	1.35548	1.73272	0.000148735
1571	1	2	172	72	(2147.901040304121, 'Miss', 'Miss')	348	2150.8	1	2151.8	2155.34	left	0.537179	0	45	0	1	20	0	sub-12	0.163429	FALSE	8.84331	13.1861	-6.07678	0	0	1	0.0971429	3.36375	1.74178	0.000202618
1572	1	2	173	73	(2158.336528215601, 'Miss', 'Miss')	360	2161.34	1	2162.34	2166.57	left	1.23802	0	315	1	1	80	1	sub-12	0.102857	FALSE	5.6977	2.38095	-12.9346	0	0	0	0.397727	1.33015	1.73942	0.000200308
1573	1	2	174	74	(2169.572135362989, 'Miss', 'Miss')	300	2172.07	1	2173.07	2176.89	right	0.820894	45	45	1	1	80	1	sub-12	0.195429	FALSE	8.18946	9.0529	0.329628	0	0	3	0.389831	1.35908	1.73724	2.4314e-05
1574	1	2	175	75	(2179.8908439421757, 'Miss', 'Miss')	348	2182.79	1	2183.79	2187.46	left	0.670393	0	315	1	1	80	1	sub-12	0	FALSE	5.19591	1.76986	-5.7312	0	0	0	0.398876	1.32599	1.73491	2.38885e-05
1575	1	2	176	76	(2190.4597284761585, 'Miss', 'Miss')	300	2192.96	1	2193.96	2197.24	left	0.288082	0	315	1	1	80	1	sub-12	0.374857	FALSE	0.46336	2.2711	-4.2663	0	0	0	0.402235	1.31389	1.73254	0.000133963
1576	1	2	177	77	(2200.2450300572673, 'Miss', 'Miss')	348	2203.15	1	2204.15	2207.45	right	0.304141	45	45	1	1	80	1	sub-12	0.230857	FALSE	2.57669	1.04662	2.83032	0	0	3	0.388889	1.36257	1.73046	2.30337e-05
1577	1	2	178	78	(2210.447155441394, 'Miss', 'Miss')	312	2213.05	0	2214.05	2217.43	right	0.38744	45	45	1	1	80	1	sub-12	0.122857	FALSE	-5.32945	0.565293	9.91378	0	0	3	0.392265	1.3501	1.72834	0.000136604
1578	1	2	179	79	(2220.43251367204, 'Miss', 'Miss')	336	2223.23	1	2224.23	2228.22	right	0.988486	45	315	0	1	20	0	sub-12	0.353143	FALSE	3.25056	14.0726	-9.84512	0	0	2	0.104396	3.25987	1.73652	0.000172383
1579	1	2	180	80	(2231.2180740877193, 'Miss', 'Miss')	384	2234.42	0	2235.42	2238.95	right	0.537195	45	45	1	1	80	1	sub-12	0.164571	FALSE	1.25491	4.29783	-6.79277	0	0	3	0.393443	1.34577	1.73437	0.000171159
1580	1	2	181	81	(2241.953591489142, 'Miss', 'Miss')	408	2245.35	0	2246.35	2249.69	right	0.338002	45	45	1	1	80	1	sub-12	0.252	FALSE	-3.90451	-3.71901	0.95864	0	0	3	0.396739	1.33374	1.73217	0.000129723
1581	1	2	182	82	(2252.6891166583737, 'Miss', 'Miss')	312	2255.29	0	2256.29	2259.81	right	0.52105	0	315	1	1	80	0	sub-12	0.398286	FALSE	-2.85573	-2.99876	5.01777	0	0	0	0.394595	1.34156	1.73004	2.17654e-05
1582	1	2	183	83	(2262.8078448790293, 'Miss', 'Miss')	336	2265.61	0	2266.61	2270.03	right	0.420608	45	45	1	1	80	1	sub-12	0.253143	FALSE	1.76633	4.81547	4.07787	0	0	3	0.397849	1.32971	1.72787	2.13913e-05
1583	1	2	184	84	(2273.026579508125, 'Miss', 'Miss')	348	2275.93	0	2276.93	2280.73	right	0.803228	0	315	1	1	80	0	sub-12	0.198286	FALSE	5.92962	5.6922	-9.67176	0	0	0	0.395722	1.33744	1.72576	2.10165e-05
1584	1	2	185	85	(2283.728772444465, 'Miss', 'Miss')	348	2286.63	1	2287.63	2291	right	0.370475	45	45	1	1	80	1	sub-12	0.0571429	FALSE	7.29719	12.2043	-6.70976	0	0	3	0.398936	1.32577	1.72361	2.06595e-05
1585	1	2	186	86	(2293.9975614621108, 'Miss', 'Miss')	408	2297.4	1	2298.4	2301.73	left	0.336975	0	45	0	1	20	0	sub-12	0.382286	FALSE	-5.42513	-0.477461	0.232837	0	0	1	0.0952381	3.39232	1.73221	0.000177024
1586	1	2	187	87	(2304.733097450797, 'Miss', 'Miss')	336	2307.53	1	2308.53	2312.22	left	0.686935	0	45	0	1	20	0	sub-12	0.814286	TRUE	-2.25665	3.38046	-1.14624	0	0	1	0.1	3.32193	1.74036	0.00073015
1587	1	2	188	88	(2315.2185764986534, 'Miss', 'Miss')	324	2317.92	1	2318.92	2322.05	right	0.136903	45	45	1	1	80	1	sub-12	0.551429	TRUE	-5.00027	3.5362	-4.74321	0	0	3	0.397906	1.3295	1.73819	0.000164757
1588	1	2	189	89	(2325.053930526359, 'Miss', 'Miss')	372	2328.15	0	2329.15	2337.91	right	5.75555	45	45	1	1	80	1	sub-12	1	TRUE	-0.901519	-1.75008	2.3981	0	0	3	0.401042	1.31818	1.73598	0.000117009
1589	1	2	190	90	(2340.9073447152114, 'Miss', 'Miss')	324	2343.61	1	2344.61	2348.53	right	0.9197	45	315	0	1	20	0	sub-12	0.544571	TRUE	-0.946943	5.52069	-0.110016	0	0	2	0.103627	3.27053	1.74373	0.000153776
1590	1	2	191	91	(2351.526168507684, 'Miss', 'Miss')	324	2354.23	1	2355.23	2358.59	left	0.3713	0	45	0	1	20	0	sub-12	0.187429	FALSE	-3.82198	-13.1884	2.10341	0	0	1	0.103093	3.27798	1.75143	0.000287502
1591	1	2	192	92	(2361.5947482937845, 'Miss', 'Miss')	300	2364.09	1	2365.1	2368.56	right	0.470133	45	45	1	1	80	1	sub-12	0.206857	FALSE	-7.2553	-7.25952	3.21552	0	0	3	0.4	1.32193	1.74921	0.000152384
1592	1	2	193	93	(2371.5634512274373, 'Miss', 'Miss')	348	2374.46	1	2375.46	2379.03	right	0.571698	45	45	1	1	80	1	sub-12	0.289143	FALSE	-3.01626	-1.31233	0.823793	0	0	3	0.403061	1.31093	1.74696	0.000111337
1593	1	2	194	94	(2382.032260829783, 'Miss', 'Miss')	324	2384.73	1	2385.73	2389.65	left	0.92132	0	315	1	1	80	1	sub-12	0.174286	FALSE	-9.7956	-13.8134	5.08631	0	0	0	0.380711	1.39323	1.74514	2.0185e-05
1594	1	2	195	95	(2392.6511187451433, 'Miss', 'Miss')	300	2395.15	0	2396.15	2399.89	right	0.737979	0	315	1	1	80	0	sub-12	0.322286	FALSE	-4.22593	-9.34429	8.69816	0	0	0	0.383838	1.38143	1.74329	0.000118277
1595	1	2	196	96	(2402.886475658037, 'Miss', 'Miss')	384	2406.09	1	2407.09	2410.34	left	0.254785	0	315	1	1	80	1	sub-12	0.263429	FALSE	3.44984	2.11173	-2.30613	0	0	0	0.386935	1.36984	1.74139	0.000115565
1596	1	2	197	97	(2413.338638840887, 'Miss', 'Miss')	312	2415.94	1	2416.94	2420.61	right	0.670134	45	45	1	1	80	1	sub-12	0.778857	TRUE	-1.39961	-2.26548	2.87835	0	0	3	0.4	1.32193	1.73928	1.91853e-05
1597	1	2	198	98	(2423.6074295230646, 'Miss', 'Miss')	312	2426.21	1	2427.21	2431.08	left	0.870775	0	315	1	1	80	1	sub-12	0.452571	TRUE	11.8946	14.7649	-14.1548	0	0	0	0.38806	1.36565	1.7374	1.88573e-05
1598	1	2	199	99	(2434.0762338543936, 'Miss', 'Miss')	360	2437.08	0	2438.08	2448.5	right	7.42282	0	315	1	1	80	0	sub-12	0.822286	TRUE	-0.741149	-3.97048	3.6817	0	0	0	0.391089	1.35443	1.73549	0.000110208
1599	1	2	200	100	(2451.4965922889496, 'Miss', 'Miss')	324	2454.2	1	2455.2	2459.15	left	0.954969	0	315	1	1	80	1	sub-12	0.177143	FALSE	-7.11683	-10.6857	-9.13718	0	0	0	0.394089	1.34341	1.73354	0.000107757
1600	1	1	1	1	(95.63541583729238, 'Miss', 'Miss')	384	98.8381	1	99.8383	108.307	right	5.47113	0	45	1	1	80	1	sub-13	0.168571	FALSE	-12.1386	2.0777	12.793	1	1	1	0.25	2	1.92193	0.0780719
1601	1	1	2	2	(111.30784779195892, 'Miss', 'Miss')	396	114.608	1	115.608	121.143	right	2.53725	45	45	0	1	20	1	sub-13	0.377143	FALSE	-0.411765	-8.13683	1.57297	0	0	3	0.2	2.32193	1.9183	0.0817042
1602	1	1	3	3	(124.14382546393972, 'Miss', 'Miss')	372	127.244	0	128.244	133.562	left	2.32164	45	315	1	1	80	1	sub-13	0.115429	FALSE	-6.88433	-11.5638	-5.14838	0	0	2	0.166667	2.58496	1.95021	0.0860017
1603	1	1	4	4	(136.56304702383204, 'Miss', 'Miss')	300	139.063	1	140.063	143.164	right	0.102934	45	315	1	1	80	0	sub-13	0.128	FALSE	-11.1378	-1.25367	9.31515	0	0	2	0.285714	1.80735	1.90564	0.179323
1604	1	1	5	5	(146.16506182761805, 'Miss', 'Miss')	372	149.265	1	150.265	153.7	right	0.436267	45	315	1	1	80	0	sub-13	0.200571	FALSE	-4.11261	-2.25444	2.65225	0	0	2	0.375	1.41504	1.83659	0.0818744
1605	1	1	6	6	(156.70034724890502, 'Miss', 'Miss')	336	159.501	1	160.501	163.685	left	0.186348	45	315	1	1	80	1	sub-13	0	FALSE	-18.2242	-11.0852	10.2403	0	0	2	0.444444	1.16993	1.76096	0.0465547
1606	1	1	7	7	(166.68577816407196, 'Miss', 'Miss')	360	169.686	1	170.686	174.22	right	0.538285	0	45	1	1	80	1	sub-13	0.0868571	FALSE	-6.67174	-7.34579	7.66282	0	0	1	0.2	2.32193	1.78993	0.0163596
1607	1	1	8	8	(177.22130050360283, 'Miss', 'Miss')	300	179.722	0	180.722	185.439	right	1.72127	45	315	1	1	80	0	sub-13	0.0868571	FALSE	-3.37298	5.28653	-4.67998	0	0	2	0.454545	1.1375	1.72957	0.0147234
1608	1	1	9	9	(188.4404318459201, 'Miss', 'Miss')	408	191.841	1	192.841	196.592	left	0.753411	45	315	1	1	80	1	sub-13	0.0948571	FALSE	0.698561	11.9253	-8.92539	0	0	2	0.5	1	1.66918	0.0203756
1609	1	1	10	10	(199.59256664851637, 'Miss', 'Miss')	396	202.893	0	203.893	209.744	right	2.85442	45	315	1	1	80	0	sub-13	0.101714	FALSE	-3.28552	7.66548	-2.15038	0	0	2	0.538462	0.893085	1.61058	0.0147719
1610	1	1	11	11	(212.74553094238217, 'Miss', 'Miss')	408	216.146	1	217.146	221.08	left	0.936936	45	315	1	1	80	1	sub-13	0	FALSE	-19.4032	-0.375386	9.86759	0	0	2	0.571429	0.807355	1.55461	0.0110912
1611	1	1	12	12	(224.08098775487815, 'Miss', 'Miss')	408	227.481	1	228.482	231.916	left	0.436699	45	315	1	1	80	1	sub-13	0.0748571	FALSE	-3.78941	-6.05436	4.68848	0	0	2	0.6	0.736966	1.50161	0.00855998
1612	1	1	13	13	(234.91656871364103, 'Miss', 'Miss')	324	237.617	1	238.617	241.801	right	0.186722	0	45	1	1	80	1	sub-13	0.116571	FALSE	-6.44091	-10.5825	3.62808	0	0	1	0.1875	2.41504	1.54515	0.00649722
1613	1	1	14	14	(244.80193218756176, 'Miss', 'Miss')	348	247.702	0	248.703	253.337	right	1.63651	0	45	1	1	80	1	sub-13	0	FALSE	-13.08	-10.7945	6.78631	0	0	1	0.235294	2.08746	1.56832	0.0347877
1614	1	1	15	15	(256.3378304336766, 'Miss', 'Miss')	336	259.138	0	260.138	263.706	right	0.570368	0	45	1	1	80	1	sub-13	0.0982857	FALSE	-3.06889	-5.29796	2.3752	0	0	1	0.277778	1.848	1.57798	0.0242603
1615	1	1	16	16	(266.7065209943139, 'Miss', 'Miss')	384	269.907	1	270.907	274.208	left	0.303864	45	45	0	1	20	0	sub-13	0.104	FALSE	-3.43633	-7.38033	5.09803	0	0	3	0.105263	3.24793	1.64773	0.0146516
1616	1	1	17	17	(277.20864868104036, 'Miss', 'Miss')	408	280.609	1	281.609	285.11	right	0.502997	0	315	0	1	20	0	sub-13	0.668	TRUE	-3.20106	9.59033	-4.4321	0	0	0	0.05	4.32193	1.75022	0.0344143
1617	1	1	18	18	(288.1109443189416, 'Miss', 'Miss')	408	291.511	1	292.511	296.262	right	0.753133	45	315	1	1	80	0	sub-13	0.0605714	FALSE	-6.51566	-11.7126	7.37294	0	0	2	0.47619	1.07039	1.71769	0.0221573
1618	1	1	19	19	(299.2631892580066, 'Miss', 'Miss')	300	301.763	0	302.764	306.681	left	0.921407	45	45	0	1	20	0	sub-13	0.560571	TRUE	1.41408	1.91472	6.55608	0	0	3	0.136364	2.87447	1.75993	0.00669846
1619	1	1	20	20	(309.6820479501439, 'Miss', 'Miss')	384	312.882	0	313.883	317.867	right	0.98782	0	45	1	1	80	1	sub-13	0	FALSE	2.89832	6.09388	-1.03198	0	0	1	0.26087	1.9386	1.76391	0.00850649
1620	1	1	21	21	(320.86767866451555, 'Miss', 'Miss')	360	323.868	1	324.868	328.402	left	0.536642	45	315	1	1	80	1	sub-13	0.790857	TRUE	-9.92287	-17.2297	3.43899	0	0	2	0.458333	1.12553	1.73701	0.00223047
1621	1	1	22	22	(331.4032007266251, 'Miss', 'Miss')	372	334.503	0	335.504	339.955	right	1.45442	0	45	1	1	80	1	sub-13	0.557143	TRUE	-0.10148	-14.4676	6.62943	0	0	1	0.28	1.8365	1.73815	0.00173552
1622	1	1	23	23	(342.9556871336463, 'Miss', 'Miss')	348	345.856	0	346.856	350.607	right	0.753464	0	45	1	1	80	1	sub-13	0.223429	FALSE	-8.05212	-18.6064	0.117624	0	0	1	0.307692	1.70044	1.73456	0.00982538
1623	1	1	24	24	(353.60770944169053, 'Miss', 'Miss')	348	356.508	0	357.508	361.142	right	0.637618	45	315	1	1	80	0	sub-13	0.269714	FALSE	2.19603	0.249375	8.15035	0	0	2	0.444444	1.16993	1.71325	0.00131797
1624	1	1	25	25	(364.1432545298121, 'Miss', 'Miss')	300	366.643	0	367.644	371.511	left	0.871629	45	315	1	1	80	1	sub-13	0.170286	FALSE	-4.90895	5.96217	-2.3839	0	0	2	0.464286	1.10692	1.69135	0.00426837
1625	1	1	26	26	(374.5120077877873, 'Miss', 'Miss')	372	377.612	1	378.613	381.947	right	0.338129	0	45	1	1	80	1	sub-13	0	FALSE	-0.805692	3.11476	-5.56119	0	0	1	0.310345	1.68806	1.68948	0.00102579
1626	1	1	27	27	(384.94752316403174, 'Miss', 'Miss')	312	387.548	1	388.548	391.899	right	0.354185	0	315	0	1	20	0	sub-13	0.409714	TRUE	-0.417077	7.88525	5.75941	0	0	0	0.0666667	3.90689	1.75171	0.00942721
1627	1	1	28	28	(394.8995380649103, 'Miss', 'Miss')	336	397.7	1	398.7	402.067	left	0.370456	45	315	1	1	80	1	sub-13	0.644571	TRUE	-3.5641	-4.26967	-2.56485	0	0	2	0.451613	1.14684	1.73195	0.00838818
1628	1	1	29	29	(405.06831762247384, 'Miss', 'Miss')	372	408.169	1	409.169	413.136	left	0.970973	45	45	0	1	20	0	sub-13	0	FALSE	6.68259	3.74618	-2.22135	0	0	3	0.125	3	1.766	0.00382266
1629	1	1	30	30	(416.13729467663507, 'Miss', 'Miss')	360	419.138	1	420.138	423.688	right	0.553476	45	315	1	1	80	0	sub-13	0.119429	FALSE	-6.19871	-14.2405	12.1386	0	0	2	0.454545	1.1375	1.74676	0.00369572
1630	1	1	31	31	(426.6894692615242, 'Miss', 'Miss')	300	429.19	1	430.19	433.691	right	0.503801	0	45	1	1	80	1	sub-13	0.105143	FALSE	-4.291	-9.22448	-2.47166	0	0	1	0.294118	1.76553	1.7459	0.000890795
1631	1	1	32	32	(436.69151580236576, 'Miss', 'Miss')	408	440.092	1	441.092	444.359	left	0.269943	45	315	1	1	80	1	sub-13	0	FALSE	3.77258	-14.534	2.42166	0	0	2	0.457143	1.12928	1.72812	0.000854703
1632	1	1	33	33	(447.3603518152704, 'Miss', 'Miss')	384	450.561	1	451.561	454.928	right	0.371514	0	45	1	1	80	1	sub-13	0.110857	FALSE	12.1204	20.444	-13.2036	0	0	1	0.305556	1.71049	1.72645	0.000728
1633	1	1	34	34	(457.92920583285013, 'Miss', 'Miss')	336	460.729	1	461.73	465.114	right	0.388161	0	45	1	1	80	1	sub-13	0.114857	FALSE	-7.97985	-7.59153	6.90384	0	0	1	0.324324	1.62449	1.72274	0.00444763
1634	1	1	35	35	(468.1146401325641, 'Miss', 'Miss')	312	470.715	0	471.715	475.366	right	0.654173	0	45	1	1	80	1	sub-13	0.148	FALSE	7.06343	11.5729	-9.56189	0	0	1	0.342105	1.54749	1.71734	0.00388432
1635	1	1	36	36	(478.36675276915776, 'Miss', 'Miss')	396	481.667	0	482.667	487.168	right	1.50428	45	315	1	1	80	0	sub-13	0.0988571	FALSE	-8.53124	-13.8964	19.0943	0	0	2	0.435897	1.19794	1.70377	0.000527712
1636	1	1	37	37	(490.1693726854355, 'Miss', 'Miss')	372	493.27	0	494.27	497.87	right	0.604239	0	45	1	1	80	1	sub-13	0.105143	FALSE	-1.24715	8.90449	-1.55692	0	0	1	0.35	1.51457	1.69837	0.000468604
1637	1	1	38	38	(500.8713764200875, 'Miss', 'Miss')	348	503.772	0	504.772	508.656	right	0.88644	0	45	1	1	80	1	sub-13	0.127429	FALSE	-3.8899	-8.51296	4.20691	0	0	1	0.365854	1.45066	1.69177	0.00299927
1638	1	1	39	39	(511.65691020326994, 'Miss', 'Miss')	300	514.157	0	515.157	518.725	right	0.570426	0	45	1	1	80	1	sub-13	0.118857	FALSE	4.75954	0.666676	-6.76264	0	0	1	0.380952	1.39232	1.68417	0.00267628
1639	1	1	40	40	(521.7256883459813, 'Miss', 'Miss')	324	524.426	0	525.426	528.527	left	0.104077	45	315	1	1	80	1	sub-13	0.104	FALSE	-3.15029	-8.31499	5.09369	0	0	2	0.418605	1.25634	1.67393	0.000361168
1640	1	1	41	41	(531.5277134698554, 'Miss', 'Miss')	360	534.528	0	535.528	539.346	left	0.82136	45	315	1	1	80	1	sub-13	0	FALSE	5.05838	-0.573126	2.33399	0	0	2	0.431818	1.2115	1.66319	0.00196859
1641	1	1	42	42	(542.3465844795246, 'Miss', 'Miss')	384	545.547	0	546.547	550.065	left	0.520835	45	315	1	1	80	1	sub-13	0.121714	FALSE	-5.20929	-10.9596	4.83013	0	0	2	0.444444	1.16993	1.65204	0.0017868
1642	1	1	43	43	(553.0654654486389, 'Miss', 'Miss')	372	556.166	1	557.166	560.5	right	0.33642	0	45	1	1	80	1	sub-13	0.220571	FALSE	-4.78188	-16.8192	2.57688	0	0	1	0.369565	1.4361	1.64689	0.000296048
1643	1	1	44	44	(563.5009880378493, 'Miss', 'Miss')	348	566.401	0	567.401	570.852	left	0.454361	45	315	1	1	80	1	sub-13	0.0931429	FALSE	-9.67813	-6.85579	7.40303	0	0	2	0.446809	1.16227	1.63641	0.000283439
1644	1	1	45	45	(573.8530854439814, 'Miss', 'Miss')	300	576.353	0	577.353	580.621	right	0.269767	0	45	1	1	80	1	sub-13	0	FALSE	12.4848	26.5852	-6.05989	0	0	1	0.375	1.41504	1.63139	0.000257784
1645	1	1	46	46	(583.6217139731016, 'Miss', 'Miss')	348	586.522	0	587.522	590.806	left	0.286381	45	315	1	1	80	1	sub-13	0.302857	FALSE	-4.23794	-17.3399	2.02015	0	0	2	0.44898	1.15528	1.62151	0.000247221
1646	1	1	47	47	(593.8071388404715, 'Miss', 'Miss')	312	596.407	0	597.408	601.008	left	0.603396	45	315	1	1	80	1	sub-13	0	FALSE	3.05372	16.6097	2.97105	0	0	2	0.46	1.12029	1.61136	0.00135786
1647	1	1	48	48	(604.0092395340544, 'Miss', 'Miss')	324	606.709	1	607.71	611.294	left	0.58672	45	315	1	1	80	1	sub-13	0.0897143	FALSE	-4.25564	-1.14267	-0.123531	0	0	2	0.470588	1.08746	1.60099	0.00125024
1648	1	1	49	49	(614.2946844035396, 'Miss', 'Miss')	312	616.895	1	617.895	621.196	left	0.303695	45	315	1	1	80	1	sub-13	0.166857	FALSE	-1.84961	-0.572488	-3.2308	0	0	2	0.480769	1.05658	1.59044	0.00115409
1649	1	1	50	50	(624.196730639218, 'Miss', 'Miss')	396	627.497	0	628.497	631.915	right	0.42086	0	315	0	1	20	0	sub-13	0.644	TRUE	-1.97266	5.37932	-0.687424	0	0	0	0.0566038	4.14296	1.63393	0.00353966
1650	1	1	51	51	(634.9156113309073, 'Miss', 'Miss')	348	637.816	0	638.816	642.434	left	0.620505	45	315	1	1	80	1	sub-13	0.114286	FALSE	2.53823	-1.91894	-5.34069	0	0	2	0.481481	1.05445	1.62314	0.0034742
1651	1	1	52	52	(645.4344348182167, 'Miss', 'Miss')	360	648.435	0	649.435	652.836	right	0.403055	0	315	0	1	20	0	sub-13	0.408	TRUE	0.569581	-7.00941	5.1238	0	0	0	0.0727273	3.78136	1.65893	0.00252777
1652	1	1	53	53	(655.8365807870396, 'Miss', 'Miss')	348	658.737	1	659.737	663.104	left	0.371386	45	45	0	1	20	0	sub-13	0.637714	TRUE	-3.02888	0.64044	2.84775	0	0	3	0.0892857	3.48543	1.68882	0.00439684
1653	1	1	54	54	(666.1053747982805, 'Miss', 'Miss')	300	668.606	1	669.606	673.207	right	0.60408	0	45	1	1	80	1	sub-13	0.440571	TRUE	-9.02739	-17.3049	14.1766	0	0	1	0.333333	1.58496	1.6866	0.00210182
1654	1	1	55	55	(676.2074640898245, 'Miss', 'Miss')	372	679.308	0	680.308	683.742	left	0.438212	45	315	1	1	80	1	sub-13	0.368571	FALSE	2.90935	-2.44964	1.21587	0	0	2	0.465517	1.10309	1.67647	0.0002317
1655	1	1	56	56	(686.7429245642888, 'Miss', 'Miss')	372	689.843	1	690.843	694.594	right	0.753145	0	45	1	1	80	1	sub-13	0.421714	TRUE	-7.7085	-16.2496	7.26162	0	0	1	0.338983	1.56071	1.67416	0.00021146
1656	1	1	57	57	(697.5951966074645, 'Miss', 'Miss')	312	700.195	1	701.196	704.48	right	0.28741	0	45	1	1	80	1	sub-13	0.678857	TRUE	-10.9176	-22.6833	9.51583	0	0	1	0.35	1.51457	1.67118	0.00149715
1657	1	1	58	58	(707.4805126422507, 'Miss', 'Miss')	396	710.781	1	711.781	715.115	right	0.337335	0	45	1	1	80	1	sub-13	0.105143	FALSE	-12.8234	-13.182	10.7155	0	0	1	0.360656	1.47131	1.66763	0.00138177
1658	1	1	59	59	(718.1160635839733, 'Miss', 'Miss')	324	720.816	1	721.816	725.384	right	0.571334	0	45	1	1	80	1	sub-13	0.382286	FALSE	-0.987351	-9.36922	11.6166	0	0	1	0.370968	1.43063	1.66356	0.0012787
1659	1	1	60	60	(728.3848265239685, 'Miss', 'Miss')	324	731.085	0	732.085	735.836	left	0.75393	45	315	1	1	80	1	sub-13	0.177143	FALSE	-5.90457	-6.41833	11.4325	0	0	2	0.444444	1.16993	1.65563	0.000161454
1660	1	1	61	61	(738.8369655711176, 'Miss', 'Miss')	408	742.237	0	743.238	747.422	right	1.18795	0	45	1	1	80	1	sub-13	0.122857	FALSE	-1.56399	-8.98234	10.7982	0	0	1	0.375	1.41504	1.65164	0.000150547
1661	1	1	62	62	(750.4226527130886, 'Miss', 'Miss')	372	753.523	0	754.523	758.007	left	0.48767	0	45	1	1	80	0	sub-13	0	FALSE	-3.30284	-12.2093	11.5768	0	0	1	0.384615	1.37851	1.64724	0.00109691
1662	1	1	63	63	(761.0081692406347, 'Miss', 'Miss')	312	763.608	1	764.609	767.909	right	0.30475	0	45	1	1	80	1	sub-13	0	FALSE	-3.41802	-7.04884	15.5446	0	0	1	0.393939	1.34395	1.64246	0.00102258
1663	1	1	64	64	(770.9102437733382, 'Miss', 'Miss')	372	774.011	0	775.011	778.661	right	0.655005	0	45	1	1	80	1	sub-13	0.269714	FALSE	-3.46158	-9.40335	1.92416	0	0	1	0.402985	1.3112	1.63736	0.000955186
1664	1	1	65	65	(781.6624081490991, 'Miss', 'Miss')	360	784.663	0	785.663	789.03	right	0.370156	0	45	1	1	80	1	sub-13	0.189143	FALSE	6.97853	15.9663	-9.69253	0	0	1	0.411765	1.28011	1.63197	0.000893883
1665	1	1	66	66	(792.0311844330863, 'Miss', 'Miss')	324	794.731	0	795.732	799.232	left	0.503878	45	315	1	1	80	1	sub-13	0.617714	TRUE	-2.36446	8.79884	-8.30638	0	0	2	0.42029	1.25054	1.62632	0.00011474
1666	1	1	67	67	(802.2332856815119, 'Miss', 'Miss')	408	805.634	0	806.634	810.268	right	0.638029	0	45	1	1	80	1	sub-13	0.198857	FALSE	-0.917767	-7.3733	-1.72842	0	0	1	0.414286	1.2713	1.62112	0.000109394
1667	1	1	68	68	(813.2689069219268, 'Miss', 'Miss')	408	816.669	1	817.669	821.104	right	0.437716	0	315	0	1	20	0	sub-13	0.378286	FALSE	4.7792	-2.93569	7.66024	0	0	0	0.0704225	3.82782	1.65002	0.00165655
1668	1	1	69	69	(824.1044634675673, 'Miss', 'Miss')	408	827.505	1	828.505	832.039	left	0.536554	45	315	1	1	80	1	sub-13	0	FALSE	-9.21071	-11.3085	4.22473	0	0	2	0.416667	1.26303	1.64453	0.00163056
1669	1	1	70	70	(835.0400286410295, 'Miss', 'Miss')	312	837.64	0	838.64	842.174	right	0.537553	0	45	1	1	80	1	sub-13	0.172	FALSE	-6.72553	-14.4153	-2.74047	0	0	1	0.410959	1.28293	1.63946	0.000106154
1670	1	1	71	71	(845.1754202039119, 'Miss', 'Miss')	360	848.176	0	849.176	852.66	right	0.487433	0	45	1	1	80	1	sub-13	0.651429	TRUE	-7.3486	-8.92781	7.24452	0	0	1	0.418919	1.25526	1.63416	0.000732548
1671	1	1	72	72	(855.6609283810576, 'Miss', 'Miss')	336	858.461	0	859.461	863.212	left	0.753406	45	315	1	1	80	1	sub-13	0.245714	FALSE	-15.1349	-15.9548	3.19794	0	0	2	0.413333	1.27462	1.62925	9.73803e-05
1672	1	1	73	73	(866.2130641268886, 'Miss', 'Miss')	360	869.213	0	870.214	873.781	right	0.570626	0	315	0	1	20	0	sub-13	0.110857	FALSE	-1.14567	1.28552	-1.57022	0	0	0	0.0789474	3.66297	1.6543	0.00128494
1673	1	1	74	74	(876.7819028862687, 'Miss', 'Miss')	360	879.782	1	880.782	884.05	right	0.271181	0	45	1	1	80	1	sub-13	0.196	FALSE	-11.3964	-14.8018	8.67808	0	0	1	0.415584	1.26679	1.64917	0.00126572
1674	1	1	75	75	(887.0506619423577, 'Miss', 'Miss')	360	890.051	1	891.051	894.502	right	0.45374	0	315	0	1	20	0	sub-13	0.170286	FALSE	-0.774446	10.927	-6.98386	0	0	0	0.0897436	3.47805	1.67119	0.00105853
1675	1	1	76	76	(897.502870344968, 'Miss', 'Miss')	336	900.303	0	901.303	905.521	left	1.22002	45	45	0	1	20	0	sub-13	0.112	FALSE	2.69423	-2.50724	2.157	0	0	3	0.0759494	3.71882	1.69547	0.00219797
1676	1	1	77	77	(908.521733364887, 'Miss', 'Miss')	396	911.822	0	912.822	916.406	right	0.588386	0	45	1	1	80	1	sub-13	0.515429	TRUE	-7.88384	-14.6749	10.6148	0	0	1	0.4125	1.27753	1.69016	0.00122807
1677	1	1	78	78	(919.4073442990775, 'Miss', 'Miss')	360	922.408	1	923.408	926.725	left	0.320328	45	315	1	1	80	1	sub-13	0.0914286	FALSE	-4.88986	-17.553	-0.803128	0	0	2	0.395062	1.33985	1.68572	9.97791e-05
1678	1	1	79	79	(929.7260664719361, 'Miss', 'Miss')	324	932.426	0	933.427	936.911	right	0.48696	0	315	0	1	20	0	sub-13	0.346286	FALSE	-4.3487	-0.490675	-6.31088	0	0	0	0.097561	3.35755	1.70492	0.000886848
1679	1	1	80	80	(939.9114866231357, 'Miss', 'Miss')	312	942.512	1	943.512	947.846	left	1.33693	45	315	1	1	80	1	sub-13	0.224571	FALSE	-2.95872	-11.7878	9.0709	0	0	2	0.39759	1.33065	1.70031	0.00087341
1680	1	1	81	81	(950.8470689967507, 'Miss', 'Miss')	384	954.047	0	955.048	958.949	right	0.903583	0	45	1	1	80	1	sub-13	0.284	FALSE	-9.23983	-9.43331	-3.75982	0	0	1	0.404762	1.30485	1.69552	9.60563e-05
1681	1	1	82	82	(961.9493366705319, 'Miss', 'Miss')	372	965.05	1	966.05	969.301	left	0.253737	45	315	1	1	80	1	sub-13	0.514857	TRUE	-5.19581	0.403937	15.6397	0	0	2	0.4	1.32193	1.69102	9.2346e-05
1682	1	1	83	83	(972.3014632059603, 'Miss', 'Miss')	348	975.202	1	976.202	979.619	right	0.421037	0	45	1	1	80	1	sub-13	0.373714	FALSE	-0.402576	-9.07828	1.41557	0	0	1	0.406977	1.29698	1.68636	8.90218e-05
1683	1	1	84	84	(982.6202608375534, 'Miss', 'Miss')	408	986.021	0	987.021	990.388	left	0.370497	45	45	0	1	20	0	sub-13	0.556571	TRUE	5.92966	16.2144	-5.53557	0	0	3	0.0804598	3.63559	1.70748	0.000972591
1684	1	1	85	85	(993.3891379366323, 'Miss', 'Miss')	324	996.089	0	997.09	1000.66	right	0.570189	45	315	1	1	80	0	sub-13	0.754286	TRUE	-5.30041	-10.7963	20.643	0	0	2	0.397727	1.33015	1.70311	0.000965931
1685	1	1	86	86	(1003.6578600956163, 'Miss', 'Miss')	384	1006.86	1	1007.86	1011.18	right	0.320722	0	45	1	1	80	1	sub-13	0.489714	TRUE	1.11664	2.72939	-15.0626	0	0	1	0.404494	1.30581	1.69856	8.58658e-05
1686	1	1	87	87	(1014.1767032798743, 'Miss', 'Miss')	336	1016.98	1	1017.98	1021.78	left	0.803357	45	315	1	1	80	1	sub-13	0.174857	FALSE	-2.95569	-8.71977	12.0471	0	0	2	0.4	1.32193	1.69429	8.27353e-05
1687	1	1	88	88	(1024.7788479170777, 'Miss', 'Miss')	384	1027.98	0	1028.98	1032.6	left	0.62145	45	315	1	1	80	1	sub-13	0.109143	FALSE	-16.3478	-15.3731	6.42473	0	0	2	0.406593	1.29834	1.68986	0.000509569
1688	1	1	89	89	(1035.5977228106494, 'Miss', 'Miss')	360	1038.6	1	1039.6	1042.92	left	0.32002	45	315	1	1	80	1	sub-13	0.0891429	FALSE	2.47374	9.10343	-1.86162	0	0	2	0.413043	1.27563	1.68529	0.000485348
1689	1	1	90	90	(1045.9165354230245, 'Miss', 'Miss')	384	1049.12	0	1050.12	1053.42	left	0.30358	45	45	0	1	20	0	sub-13	0.265714	FALSE	4.56419	-2.3633	4.87818	0	0	3	0.0860215	3.53916	1.70417	0.000790535
1690	1	1	91	91	(1056.4186891874015, 'Miss', 'Miss')	300	1058.92	0	1059.92	1063.29	left	0.370033	45	45	0	1	20	0	sub-13	0.530857	TRUE	-3.29188	-10.6105	7.96064	0	0	3	0.0957447	3.38466	1.72113	0.00319037
1691	1	1	92	92	(1066.2873435444926, 'Miss', 'Miss')	300	1068.79	1	1069.79	1073.09	left	0.303785	45	315	1	1	80	1	sub-13	0.116571	FALSE	-2.8967	-17.8197	7.61725	0	0	2	0.410526	1.28445	1.71647	0.000679122
1692	1	1	93	93	(1076.0893889201616, 'Miss', 'Miss')	360	1079.09	0	1080.09	1084.11	right	1.02001	0	45	1	1	80	1	sub-13	0.318857	FALSE	2.55055	2.14963	8.21837	0	0	1	0.385417	1.37551	1.71283	7.73296e-05
1693	1	1	94	94	(1087.1082663660163, 'Miss', 'Miss')	348	1090.01	0	1091.01	1094.31	left	0.303566	45	315	1	1	80	1	sub-13	0.258286	FALSE	-1.8029	-23.9479	9.31962	0	0	2	0.412371	1.27798	1.70829	7.50843e-05
1694	1	1	95	95	(1097.310376769361, 'Miss', 'Miss')	324	1100.01	1	1101.01	1104.19	right	0.18693	0	45	1	1	80	1	sub-13	0	FALSE	-0.36506	8.83619	22.8548	0	0	1	0.387755	1.36678	1.70472	7.23212e-05
1695	1	1	96	96	(1107.1957541143747, 'Miss', 'Miss')	336	1110	1	1111	1114.01	right	0.0208813	0	45	1	1	80	1	sub-13	0	FALSE	-3.2409	-16.4254	18.0846	0	0	1	0.393939	1.34395	1.701	0.000453887
1696	1	1	97	97	(1117.014422883527, 'Miss', 'Miss')	348	1119.91	0	1120.91	1123.98	right	0.0696418	0	315	0	1	20	0	sub-13	0.303429	FALSE	7.10677	-11.3889	6.2322	0	0	0	0.09	3.47393	1.71786	0.000660642
1697	1	1	98	98	(1126.9830975201548, 'Miss', 'Miss')	408	1130.38	1	1131.38	1134.62	right	0.238225	0	315	0	1	20	0	sub-13	0	FALSE	-2.47728	-0.919406	-5.29378	0	0	0	0.0990099	3.33628	1.73311	0.00265215
1698	1	1	99	99	(1137.618588261339, 'Miss', 'Miss')	336	1140.42	1	1141.42	1144.59	right	0.17131	0	45	1	1	80	1	sub-13	0.551429	TRUE	-6.11036	-18.8004	-5.1667	0	0	1	0.392157	1.3505	1.72929	0.000576189
1699	1	1	100	100	(1147.587323375923, 'Miss', 'Miss')	348	1150.49	1	1151.49	1154.79	left	0.303997	45	45	0	1	20	0	sub-13	0.048	FALSE	6.17732	-0.823685	-8.91171	0	0	3	0.0970874	3.36457	1.74441	0.000573307
1700	1	2	101	1	(1277.041254845517, 'Miss', 'Miss')	348	1279.94	0	1280.94	1284.49	left	0.554991	45	45	0	1	20	0	sub-13	0	FALSE	1.69041	1.18608	6.62293	0	0	3	0.105769	3.24101	1.75813	0.00231608
1701	1	2	102	2	(1287.4909276126018, 'Miss', 'Miss')	300	1289.99	0	1290.99	1294.54	right	0.553286	45	315	1	1	80	0	sub-13	0	FALSE	-9.76749	-7.46489	15.4341	0	0	2	0.390476	1.35669	1.75424	0.000505284
1702	1	2	103	3	(1297.542941708958, 'Miss', 'Miss')	348	1300.44	1	1301.44	1305.26	right	0.820508	0	45	1	1	80	1	sub-13	0	FALSE	0.968104	5.6085	-6.26354	0	0	1	0.386792	1.37037	1.75055	7.10091e-05
1703	1	2	104	4	(1308.2618451492417, 'Miss', 'Miss')	396	1311.56	1	1312.56	1316.1	left	0.537922	45	315	1	1	80	1	sub-13	0	FALSE	1.52339	4.22171	-6.19216	0	0	2	0.392523	1.34915	1.74674	6.89046e-05
1704	1	2	105	5	(1319.0973556428544, 'Miss', 'Miss')	324	1321.8	0	1322.8	1326.63	right	0.836887	45	315	1	1	80	0	sub-13	0	FALSE	-6.93517	0.859575	-3.65106	0	0	2	0.398148	1.32862	1.74281	0.000374631
1705	1	2	106	6	(1329.6328538466878, 'Miss', 'Miss')	396	1332.93	0	1333.93	1337.52	right	0.587652	0	315	0	1	20	0	sub-13	0.198857	FALSE	-2.2336	12.126	-9.17446	0	0	0	0.100917	3.30875	1.75653	0.000488812
1706	1	2	107	7	(1340.5184595098654, 'Miss', 'Miss')	408	1343.92	1	1344.92	1348.47	right	0.55342	0	315	0	1	20	0	sub-13	0.108	FALSE	2.01879	0.227682	-3.07785	0	0	0	0.109091	3.1964	1.76903	0.00199463
1707	1	2	108	8	(1351.4706464122828, 'Miss', 'Miss')	396	1354.77	1	1355.77	1359.31	left	0.537585	45	45	0	1	20	0	sub-13	0	FALSE	-2.03068	0.169897	-4.09921	0	0	3	0.108108	3.20945	1.78143	0.000812003
1708	1	2	109	9	(1362.306177157694, 'Miss', 'Miss')	300	1364.81	0	1365.81	1369.49	right	0.687599	0	45	1	1	80	1	sub-13	0	FALSE	-11.4217	-13.1711	3.67225	0	0	1	0.375	1.41504	1.77809	0.000439905
1709	1	2	110	10	(1372.491625605926, 'Miss', 'Miss')	372	1375.59	1	1376.59	1379.99	left	0.403417	45	45	0	1	20	0	sub-13	0.167429	FALSE	6.93537	13.446	-5.19652	0	0	3	0.115044	3.11974	1.78944	0.000399541
1710	1	2	111	11	(1382.9937849187372, 'Miss', 'Miss')	312	1385.59	0	1386.59	1390.88	left	1.2877	0	45	1	1	80	0	sub-13	0.115429	FALSE	-4.98175	-4.0606	3.76795	0	0	1	0.377193	1.40663	1.78602	0.000394606
1711	1	2	112	12	(1393.8792843293595, 'Miss', 'Miss')	384	1397.08	0	1398.08	1401.85	left	0.771384	45	45	0	1	20	0	sub-13	0.364571	FALSE	-1.43828	-7.62537	1.25142	0	0	3	0.121739	3.03814	1.79644	0.000360546
1712	1	2	113	13	(1404.848144838612, 'Miss', 'Miss')	300	1407.35	0	1408.35	1412.07	right	0.72005	0	45	1	1	80	1	sub-13	0	FALSE	1.00925	1.48523	3.88256	0	0	1	0.37931	1.39855	1.79295	0.000356114
1713	1	2	114	14	(1415.0669305133233, 'Miss', 'Miss')	348	1417.97	1	1418.97	1422.42	left	0.454587	45	315	1	1	80	1	sub-13	0	FALSE	0.624755	2.37806	-3.76986	0	0	2	0.376068	1.41093	1.78963	6.61915e-05
1714	1	2	115	15	(1425.4190872877261, 'Miss', 'Miss')	384	1428.62	1	1429.62	1433	left	0.387865	45	45	0	1	20	0	sub-13	0	FALSE	-3.93937	-4.43433	3.8062	0	0	3	0.127119	2.97575	1.79925	0.00032609
1715	1	2	116	16	(1436.0045641439538, 'Miss', 'Miss')	372	1439.1	1	1440.11	1444.44	left	1.33765	45	315	1	1	80	1	sub-13	0.104571	FALSE	0.0254357	-2.86558	6.09716	0	0	2	0.378151	1.40296	1.79587	0.000322104
1716	1	2	117	17	(1447.440163579009, 'Miss', 'Miss')	396	1450.74	0	1451.74	1455.24	right	0.503321	0	45	1	1	80	1	sub-13	0	FALSE	2.63254	5.10594	4.31907	0	0	1	0.375	1.41504	1.79264	6.37417e-05
1717	1	2	118	18	(1458.242440047059, 'Miss', 'Miss')	300	1460.74	0	1461.74	1465.09	right	0.353752	0	45	1	1	80	1	sub-13	0.101143	FALSE	-1.44254	-19.7246	2.00329	0	0	1	0.380165	1.3953	1.7893	0.000321951
1718	1	2	119	19	(1468.0944676816034, 'Miss', 'Miss')	348	1470.99	0	1471.99	1475.81	left	0.820001	45	315	1	1	80	1	sub-13	0.258286	FALSE	-0.898591	-1.12773	1.88797	0	0	2	0.377049	1.40718	1.78612	6.03432e-05
1719	1	2	120	20	(1478.813299547055, 'Miss', 'Miss')	336	1481.61	1	1482.61	1486.13	right	0.52059	0	45	1	1	80	1	sub-13	0.293143	FALSE	1.15736	7.87246	1.11973	0	0	1	0.382114	1.38793	1.78283	5.8763e-05
1720	1	2	121	21	(1489.1320697138908, 'Miss', 'Miss')	312	1491.73	1	1492.73	1496.03	right	0.303229	0	45	1	1	80	1	sub-13	0.44	TRUE	0.713783	6.02357	-10.1455	0	0	1	0.387097	1.36923	1.77945	0.00029765
1721	1	2	122	22	(1499.0341040204257, 'Miss', 'Miss')	408	1502.43	0	1503.43	1506.8	right	0.371418	0	45	1	1	80	1	sub-13	0.324	FALSE	1.42309	3.85679	-5.6788	0	0	1	0.392	1.35107	1.77598	0.000286898
1722	1	2	123	23	(1509.8029622548165, 'Miss', 'Miss')	300	1512.3	0	1513.3	1517.49	right	1.18707	45	45	0	1	20	1	sub-13	0	FALSE	-5.79512	-9.72885	15.3779	0	0	3	0.126984	2.97728	1.78513	0.000282162
1723	1	2	124	24	(1520.488522920179, 'Miss', 'Miss')	396	1523.79	0	1524.79	1528.37	left	0.587817	45	45	0	1	20	0	sub-13	0.244571	FALSE	-9.93942	1.06024	9.42391	0	0	3	0.133858	2.90122	1.79357	0.00117563
1724	1	2	125	25	(1531.3740697699286, 'Miss', 'Miss')	384	1534.57	0	1535.57	1538.96	right	0.387659	45	315	1	1	80	0	sub-13	0.106286	FALSE	-3.81376	0.354847	6.80166	0	0	2	0.367188	1.44541	1.7908	0.000265602
1725	1	2	126	26	(1541.9595851877857, 'Miss', 'Miss')	300	1544.46	0	1545.46	1548.99	right	0.536713	0	315	0	1	20	0	sub-13	0.353143	FALSE	7.80835	14.0461	-8.97161	0	0	0	0.100775	3.31079	1.80212	0.000361018
1726	1	2	127	27	(1551.9949498130045, 'Miss', 'Miss')	360	1555	0	1556	1559.43	left	0.436621	0	45	1	1	80	0	sub-13	0	FALSE	-0.456143	6.69668	-1.26688	0	0	1	0.384615	1.37851	1.79882	0.000352648
1727	1	2	128	28	(1562.43039555637, 'Miss', 'Miss')	360	1565.43	0	1566.43	1570.52	left	1.0865	45	315	1	1	80	1	sub-13	0.0902857	FALSE	3.03547	1.13415	1.20292	0	0	2	0.366412	1.44846	1.79609	5.43496e-05
1728	1	2	129	29	(1573.5159693715214, 'Miss', 'Miss')	348	1576.42	0	1577.42	1580.75	right	0.336338	0	45	1	1	80	1	sub-13	0.0914286	FALSE	2.4542	9.58378	3.04314	0	0	1	0.386364	1.37197	1.79284	5.31028e-05
1729	1	2	130	30	(1583.7514250465865, 'Miss', 'Miss')	336	1586.55	0	1587.55	1591.15	left	0.603275	45	315	1	1	80	1	sub-13	0.0851429	FALSE	3.14693	-1.75114	-0.938468	0	0	2	0.368421	1.44057	1.79014	5.16815e-05
1730	1	2	131	31	(1594.1535579765878, 'Miss', 'Miss')	372	1597.25	1	1598.25	1601.54	right	0.287469	0	45	1	1	80	1	sub-13	0	FALSE	-4.68735	-2.02323	0.213563	0	0	1	0.38806	1.36565	1.78693	5.05148e-05
1731	1	2	132	32	(1604.5390134158406, 'Miss', 'Miss')	348	1607.44	0	1608.44	1612.09	left	0.654442	45	315	1	1	80	1	sub-13	0.493714	TRUE	1.41685	12.055	-7.57787	0	0	2	0.37037	1.43296	1.78426	4.91859e-05
1732	1	2	133	33	(1615.0911386196422, 'Miss', 'Miss')	372	1618.19	1	1619.19	1622.56	left	0.370693	45	315	1	1	80	1	sub-13	0.565714	TRUE	1.58099	0.324284	-12.45	0	0	2	0.375	1.41504	1.7815	0.000260474
1733	1	2	134	34	(1625.5599473897273, 'Miss', 'Miss')	336	1628.36	0	1629.36	1633.41	left	1.05427	45	315	1	1	80	1	sub-13	0	FALSE	-5.21486	-0.750303	3.68262	0	0	2	0.379562	1.39759	1.77866	0.000251725
1734	1	2	135	35	(1636.4121975165726, 'Miss', 'Miss')	372	1639.51	0	1640.51	1643.9	right	0.386402	0	45	1	1	80	1	sub-13	0	FALSE	1.65419	10.012	17.0323	0	0	1	0.384058	1.3806	1.77574	4.56836e-05
1735	1	2	136	36	(1646.897689880676, 'Miss', 'Miss')	336	1649.7	0	1650.7	1654.78	left	1.08832	45	315	1	1	80	1	sub-13	0	FALSE	-3.65271	-1.90369	-5.11885	0	0	2	0.381295	1.39102	1.77293	4.45908e-05
1736	1	2	137	37	(1657.7831887364555, 'Miss', 'Miss')	396	1661.08	1	1662.08	1665.42	right	0.337031	0	45	1	1	80	1	sub-13	0.0405714	FALSE	1.29077	8.62158	-12.5137	0	0	1	0.385714	1.3744	1.77005	4.35657e-05
1737	1	2	138	38	(1668.418721645754, 'Miss', 'Miss')	300	1670.92	1	1671.92	1675.24	right	0.32114	0	45	1	1	80	1	sub-13	0	FALSE	-5.57865	-14.2082	5.27823	0	0	1	0.390071	1.35819	1.76709	0.000227274
1738	1	2	139	39	(1678.2374586606784, 'Miss', 'Miss')	312	1680.84	0	1681.84	1685.49	right	0.65487	0	45	1	1	80	1	sub-13	0.096	FALSE	2.01025	11.7472	-10.1504	0	0	1	0.394366	1.34239	1.76407	0.000220066
1739	1	2	140	40	(1688.4895460518856, 'Miss', 'Miss')	324	1691.19	0	1692.19	1695.54	right	0.353099	0	45	1	1	80	1	sub-13	0	FALSE	-2.53553	-1.39428	-7.69425	0	0	1	0.398601	1.32698	1.76098	0.000213175
1740	1	2	141	41	(1698.5415828968362, 'Miss', 'Miss')	372	1701.64	0	1702.64	1705.96	left	0.320421	45	315	1	1	80	1	sub-13	0.124	FALSE	8.38572	-1.78792	2.35717	0	0	2	0.375	1.41504	1.75853	3.98228e-05
1741	1	2	142	42	(1708.9604021950763, 'Miss', 'Miss')	336	1711.76	0	1712.76	1716.11	left	0.353031	45	315	1	1	80	1	sub-13	0	FALSE	-5.44232	-6.8503	7.49075	0	0	2	0.37931	1.39855	1.75601	0.000224932
1742	1	2	143	43	(1719.1124290805783, 'Miss', 'Miss')	360	1722.11	1	1723.11	1726.21	right	0.10442	0	45	1	1	80	1	sub-13	0.918286	TRUE	-7.51173	-16.0983	7.45594	0	0	1	0.39726	1.33184	1.75308	3.80573e-05
1743	1	2	144	44	(1729.214561927347, 'Miss', 'Miss')	300	1731.71	0	1732.71	1736.05	left	0.33789	45	315	1	1	80	1	sub-13	0.573714	TRUE	-6.28374	-19.8748	8.04921	0	0	2	0.380952	1.39232	1.75059	3.7149e-05
1744	1	2	145	45	(1739.0498504835086, 'Miss', 'Miss')	396	1742.35	1	1743.35	1746.53	left	0.18767	45	315	1	1	80	1	sub-13	0.112	FALSE	1.60997	-4.5668	14.7457	0	0	2	0.385135	1.37656	1.74802	0.000210618
1745	1	2	146	46	(1749.5353778027602, 'Miss', 'Miss')	360	1752.54	0	1753.54	1756.95	right	0.419639	0	45	1	1	80	1	sub-13	0	FALSE	6.05038	15.1047	0.987824	0	0	1	0.395973	1.33653	1.74523	3.55396e-05
1746	1	2	147	47	(1759.954134403666, 'Miss', 'Miss')	300	1762.45	1	1763.45	1766.56	left	0.104366	45	315	1	1	80	1	sub-13	0.0942857	FALSE	-8.40519	-3.80511	-3.78669	0	0	2	0.386667	1.37084	1.7427	3.47346e-05
1747	1	2	148	48	(1769.5560876198033, 'Miss', 'Miss')	372	1772.66	0	1773.66	1776.97	left	0.319708	45	45	0	1	20	0	sub-13	0	FALSE	-2.88291	-6.47172	9.67329	0	0	3	0.119205	3.06848	1.7512	0.000214262
1748	1	2	149	49	(1779.9749260601493, 'Miss', 'Miss')	396	1783.28	1	1784.28	1787.84	left	0.570236	45	45	0	1	20	0	sub-13	0.614286	TRUE	-2.38198	3.37566	7.60804	0	0	3	0.125	3	1.75915	0.000886582
1749	1	2	150	50	(1790.843794864315, 'Miss', 'Miss')	396	1794.14	0	1795.14	1799	left	0.853688	45	315	1	1	80	1	sub-13	0.191429	FALSE	-4.72674	-15.4413	-4.22865	0	0	2	0.385621	1.37474	1.7566	0.000198534
1750	1	2	151	51	(1801.996113875004, 'Miss', 'Miss')	324	1804.7	1	1805.7	1809.03	right	0.337906	0	45	1	1	80	1	sub-13	0.614286	TRUE	-6.58197	-7.99587	-15.0241	0	0	1	0.38961	1.3599	1.754	3.44312e-05
1751	1	2	152	52	(1812.031516229592, 'Miss', 'Miss')	312	1814.63	1	1815.63	1820.1	right	1.47098	0	45	1	1	80	1	sub-13	0.541714	TRUE	-4.17682	10.6253	5.0157	0	0	1	0.393548	1.34539	1.75133	0.000185311
1752	1	2	153	53	(1823.1005676328095, 'Miss', 'Miss')	348	1826	1	1827	1835.55	right	5.55604	0	45	1	1	80	1	sub-13	0.32	FALSE	-10.5377	-11.1303	20.0632	1	1	1	0.397436	1.33121	1.74861	0.000179981
1753	1	2	154	54	(1838.5537603280718, 'Miss', 'Miss')	324	1841.25	1	1842.25	1845.59	right	0.336195	0	45	1	1	80	1	sub-13	0.210286	FALSE	4.58043	9.74738	-6.81631	0	0	1	0.401274	1.31734	1.74584	0.000174864
1754	1	2	155	55	(1848.5891468696173, 'Miss', 'Miss')	372	1851.69	0	1852.69	1856.07	left	0.387121	45	315	1	1	80	1	sub-13	0.103429	FALSE	-3.66951	-13.2733	-5.60535	0	0	2	0.379747	1.39689	1.7436	3.17317e-05
1755	1	2	156	56	(1859.074654769338, 'Miss', 'Miss')	396	1862.37	1	1863.37	1866.73	right	0.35411	0	45	1	1	80	1	sub-13	0.337714	FALSE	-11.8897	-5.86794	-3.69292	0	0	1	0.402516	1.31288	1.74086	3.11477e-05
1756	1	2	157	57	(1869.726645728715, 'Miss', 'Miss')	372	1872.83	1	1873.83	1877.33	right	0.503357	0	45	1	1	80	1	sub-13	0	FALSE	-8.85897	10.8635	-13.3761	0	0	1	0.40625	1.29956	1.73808	0.000164909
1757	1	2	158	58	(1880.3288444631726, 'Miss', 'Miss')	300	1882.83	0	1883.83	1887.83	left	1.00371	45	315	1	1	80	1	sub-13	0.114857	FALSE	-2.51064	-10.635	10.5852	0	0	2	0.378882	1.40018	1.73595	2.98978e-05
1758	1	2	159	59	(1890.8309838016175, 'Miss', 'Miss')	384	1894.03	0	1895.03	1898.35	left	0.320785	45	315	1	1	80	1	sub-13	0.702286	TRUE	2.19542	-3.00638	-8.60326	0	0	2	0.382716	1.38565	1.73376	0.000177576
1759	1	2	160	60	(1901.3497803790124, 'Miss', 'Miss')	372	1904.45	1	1905.45	1908.75	left	0.304428	45	315	1	1	80	1	sub-13	0.108	FALSE	-2.77542	-10.0296	-6.38535	0	0	2	0.386503	1.37145	1.73151	0.000172609
1760	1	2	161	61	(1911.751920521976, 'Miss', 'Miss')	384	1914.95	1	1915.95	1919.4	right	0.453642	0	315	0	1	20	0	sub-13	0.113143	FALSE	3.75877	-1.67711	10.3244	0	0	0	0.0853659	3.5502	1.74225	0.000267273
1761	1	2	162	62	(1922.4041295349125, 'Miss', 'Miss')	300	1924.9	1	1925.9	1930.14	left	1.23801	45	315	1	1	80	1	sub-13	0.300571	FALSE	-1.69684	-16.2908	8.15934	0	0	2	0.387879	1.36632	1.73994	0.000265242
1762	1	2	163	63	(1933.1395989423581, 'Miss', 'Miss')	324	1935.84	1	1936.84	1940.22	right	0.387804	0	45	1	1	80	1	sub-13	0.658857	TRUE	-0.560196	-5.62766	-12.5628	0	0	1	0.39759	1.33065	1.73745	2.79673e-05
1763	1	2	164	64	(1943.2250554080783, 'Miss', 'Miss')	384	1946.43	1	1947.43	1950.73	left	0.304655	45	315	1	1	80	1	sub-13	0.464571	TRUE	-8.99	-14.176	15.4748	0	0	2	0.389222	1.36134	1.73518	2.74013e-05
1764	1	2	165	65	(1953.7271975207368, 'Miss', 'Miss')	372	1956.83	1	1957.83	1961.21	right	0.387969	0	45	1	1	80	1	sub-13	0.650857	TRUE	-2.09785	-9.79952	-19.9777	0	0	1	0.39881	1.32623	1.73272	2.68945e-05
1765	1	2	166	66	(1964.2126810073423, 'Miss', 'Miss')	300	1966.71	0	1967.71	1971.55	right	0.836959	0	45	1	1	80	1	sub-13	0.384571	FALSE	-8.37875	-26.0287	6.62094	0	0	1	0.402367	1.31342	1.73021	0.000150212
1766	1	2	167	67	(1974.5481297746046, 'Miss', 'Miss')	396	1977.85	1	1978.85	1983.1	right	1.25374	0	45	1	1	80	1	sub-13	0.332	FALSE	0.929074	4.90518	25.7007	0	0	1	0.405882	1.30087	1.72767	0.000146292
1767	1	2	168	68	(1986.100490509536, 'Miss', 'Miss')	312	1988.7	1	1989.7	1992.87	right	0.170957	0	315	0	1	20	0	sub-13	0.362286	FALSE	-11.0761	-15.9374	21.574	0	0	0	0.0877193	3.51096	1.73779	0.000235773
1768	1	2	169	69	(1995.8691331871705, 'Miss', 'Miss')	300	1998.37	0	1999.37	2003.35	right	0.987672	0	315	0	1	20	0	sub-13	0.209714	FALSE	-12.1545	-10.8021	23.7471	0	0	0	0.0930233	3.42626	1.74731	0.000968381
1769	1	2	170	70	(2006.3546108479168, 'Miss', 'Miss')	300	2008.85	0	2009.86	2013.47	right	0.62056	0	45	1	1	80	1	sub-13	0.198857	FALSE	-3.06348	-9.36519	-14.046	0	0	1	0.404624	1.30535	1.74474	0.000216774
1770	1	2	171	71	(2016.4733801270013, 'Miss', 'Miss')	396	2019.77	0	2020.77	2025.49	right	1.72101	0	315	0	1	20	0	sub-13	0.124571	FALSE	-7.72272	-6.78989	1.00039	0	0	0	0.0977011	3.35548	1.75373	0.000201517
1771	1	2	172	72	(2028.492654008649, 'Miss', 'Miss')	408	2031.89	1	2032.89	2036.38	left	0.487172	45	315	1	1	80	1	sub-13	0.417714	TRUE	8.18239	3.19002	1.71053	0	0	2	0.377143	1.40682	1.75172	0.000204426
1772	1	2	173	73	(2039.3780402311568, 'Miss', 'Miss')	360	2042.38	1	2043.38	2047.05	right	0.671129	0	45	1	1	80	1	sub-13	0	FALSE	-4.67852	-1.68289	-19.4006	0	0	1	0.403409	1.30968	1.74919	2.57723e-05
1773	1	2	174	74	(2050.0468784634395, 'Miss', 'Miss')	408	2053.45	0	2054.45	2058.33	right	0.886487	0	45	1	1	80	1	sub-13	0.822286	TRUE	8.65167	18.5222	-3.58038	0	0	1	0.40678	1.29768	1.74662	0.000134441
1774	1	2	175	75	(2061.3325313992937, 'Miss', 'Miss')	300	2063.83	1	2064.83	2068.3	right	0.470475	0	45	1	1	80	1	sub-13	0.683429	TRUE	-8.14702	-2.28935	17.5753	0	0	1	0.410112	1.28591	1.74401	0.000131108
1775	1	2	176	76	(2071.3012673461453, 'Miss', 'Miss')	324	2074	0	2075	2079.05	left	1.0541	45	315	1	1	80	1	sub-13	0.121714	FALSE	-10.1739	2.31018	5.68369	0	0	2	0.374302	1.41773	1.74216	2.44455e-05
1776	1	2	177	77	(2082.053460851206, 'Miss', 'Miss')	300	2084.55	0	2085.55	2089.82	left	1.27132	45	315	1	1	80	1	sub-13	0.458857	TRUE	-1.89051	3.95671	3.31981	0	0	2	0.377778	1.40439	1.74026	0.00014687
1777	1	2	178	78	(2092.8223751248042, 'Miss', 'Miss')	360	2095.82	1	2096.82	2101.19	left	1.37072	45	315	1	1	80	1	sub-13	0.540571	TRUE	4.69067	12.7991	-17.9577	0	0	2	0.381215	1.39132	1.73831	0.000143139
1778	1	2	179	79	(2104.1915095603727, 'Miss', 'Miss')	372	2107.29	0	2108.29	2111.53	right	0.238044	0	45	1	1	80	1	sub-13	0.0851429	FALSE	1.48986	8.58771	-3.65919	0	0	1	0.406593	1.29834	1.73587	2.30902e-05
1779	1	2	180	80	(2114.5267927068016, 'Miss', 'Miss')	312	2117.13	1	2118.13	2121.54	left	0.421117	45	315	1	1	80	1	sub-13	0.230286	FALSE	-7.7816	-16.1941	9.23331	0	0	2	0.382514	1.38642	1.73394	2.26333e-05
1780	1	2	181	81	(2124.545532828848, 'Miss', 'Miss')	360	2127.55	1	2128.55	2131.9	left	0.354801	45	315	1	1	80	1	sub-13	0.106286	FALSE	-10.792	-3.42883	5.31648	0	0	2	0.38587	1.37381	1.73196	0.000135799
1781	1	2	182	82	(2134.897658809434, 'Miss', 'Miss')	336	2137.7	0	2138.7	2142.5	right	0.804015	0	315	0	1	20	0	sub-13	0	FALSE	2.46201	1.99319	3.9634	0	0	0	0.0972973	3.36146	1.74053	0.000181936
1782	1	2	183	83	(2145.499813988663, 'Miss', 'Miss')	348	2148.4	0	2149.4	2153.53	right	1.1382	0	45	1	1	80	1	sub-13	0	FALSE	-3.94776	-7.40038	-3.63208	0	0	1	0.403226	1.31034	1.7382	0.000178542
1783	1	2	184	84	(2156.53542635158, 'Miss', 'Miss')	372	2159.64	0	2160.64	2163.8	right	0.169983	0	45	1	1	80	1	sub-13	0.38	FALSE	-10.9767	-11.176	7.22365	0	0	1	0.406417	1.29897	1.73583	0.000120621
1784	1	2	185	85	(2166.8041740333756, 'Miss', 'Miss')	372	2169.9	1	2170.9	2174.29	left	0.386641	45	315	1	1	80	1	sub-13	0.100571	FALSE	-7.202	1.30753	-4.32078	0	0	2	0.382979	1.38466	1.73394	2.14155e-05
1785	1	2	186	86	(2177.289692752547, 'Miss', 'Miss')	324	2179.99	0	2180.99	2184.71	right	0.720611	0	45	1	1	80	1	sub-13	0.358857	FALSE	-13.3648	-23.4059	12.714	0	0	1	0.407407	1.29546	1.7316	2.10886e-05
1786	1	2	187	87	(2187.70846405681, 'Miss', 'Miss')	360	2190.71	1	2191.71	2194.98	left	0.270138	45	315	1	1	80	1	sub-13	0.587429	TRUE	-5.1603	-11.3165	-6.77312	0	0	2	0.384211	1.38003	1.72973	2.06883e-05
1787	1	2	188	88	(2197.9772245000095, 'Miss', 'Miss')	396	2201.28	1	2202.28	2206.76	right	1.48764	0	45	1	1	80	1	sub-13	0.103429	FALSE	-11.5515	-10.7946	14.9494	0	0	1	0.408377	1.29203	1.72742	2.03759e-05
1788	1	2	189	89	(2209.763152777032, 'Miss', 'Miss')	396	2213.06	1	2214.06	2217.36	left	0.304219	45	315	1	1	80	1	sub-13	0.487429	TRUE	-14.3925	-22.8214	4.91458	0	0	2	0.385417	1.37551	1.72557	1.99938e-05
1789	1	2	190	90	(2220.36515010324, 'Miss', 'Miss')	300	2222.87	0	2223.87	2227.67	left	0.803652	45	315	1	1	80	1	sub-13	0.0931429	FALSE	0.829619	-9.48468	9.98937	0	0	2	0.388601	1.36364	1.72367	0.000122005
1790	1	2	191	91	(2230.667279953861, 'Miss', 'Miss')	360	2233.67	0	2234.67	2238.09	left	0.420853	45	315	1	1	80	1	sub-13	0.404571	TRUE	1.0144	5.72685	-17.2035	0	0	2	0.391753	1.35199	1.72174	0.000119157
1791	1	2	192	92	(2241.086070122805, 'Miss', 'Miss')	336	2243.89	1	2244.89	2248.15	left	0.270493	45	315	1	1	80	1	sub-13	0.101714	FALSE	-1.99831	4.2546	3.1118	0	0	2	0.394872	1.34054	1.71976	0.000116401
1792	1	2	193	93	(2251.1548199684876, 'Miss', 'Miss')	408	2254.56	1	2255.56	2259.52	right	0.970995	0	315	0	1	20	0	sub-13	0	FALSE	-17.1657	-31.8128	27.8059	0	0	0	0.0969388	3.36678	1.72795	0.000161918
1793	1	2	194	94	(2262.5238151382982, 'Miss', 'Miss')	312	2265.12	1	2266.12	2269.32	left	0.203604	45	45	0	1	20	0	sub-13	0.611429	TRUE	-2.27222	2.37084	-21.9732	0	0	3	0.101523	3.30012	1.73573	0.000293565
1794	1	2	195	95	(2272.3258582945964, 'Miss', 'Miss')	300	2274.83	0	2275.83	2279.51	right	0.68705	0	45	1	1	80	1	sub-13	0.702286	TRUE	-10.0742	-13.5727	-0.453696	0	0	1	0.39899	1.32558	1.73365	0.000150634
1795	1	2	196	96	(2282.51123072924, 'Miss', 'Miss')	408	2285.91	1	2286.91	2290.81	right	0.903716	0	315	0	1	20	0	sub-13	0	FALSE	-3.99235	-4.81385	21.8545	0	0	0	0.100503	3.3147	1.74139	0.000150248
1796	1	2	197	97	(2293.8135716978686, 'Miss', 'Miss')	300	2296.31	1	2297.31	2301.01	left	0.70401	45	315	1	1	80	1	sub-13	0.108571	FALSE	-5.68308	-6.45695	5.61229	0	0	2	0.39	1.35845	1.73946	0.00015044
1797	1	2	198	98	(2304.0156471460687, 'Miss', 'Miss')	324	2306.72	1	2307.72	2311	left	0.288272	45	315	1	1	80	1	sub-13	0.109143	FALSE	-13.1286	-20.732	5.47069	0	0	2	0.393035	1.34727	1.73749	0.0001104
1798	1	2	199	99	(2314.000998163745, 'Miss', 'Miss')	408	2317.4	1	2318.4	2321.44	right	0.0371179	0	45	1	1	80	1	sub-13	0.114857	FALSE	-2.18887	-3.25484	1.19684	0	0	1	0.39604	1.33628	1.73549	1.85439e-05
1799	1	2	200	100	(2324.4364860752285, 'Miss', 'Miss')	348	2327.34	1	2328.34	2332.05	left	0.720217	45	315	1	1	80	1	sub-13	0.118286	FALSE	-7.62818	-15.3383	-6.3336	0	0	2	0.394089	1.34341	1.73354	1.82442e-05
1800	1	1	1	1	(91.78763691807649, 'Miss', 'Miss')	408	95.1897	1	96.1899	101.008	right	1.82111	45	45	1	1	80	1	sub-14	0.120571	FALSE	-9.18553	2.54225	5.8057	0	0	3	0.25	2	1.92193	0.0780719
1801	1	1	2	2	(104.00857510877017, 'Miss', 'Miss')	396	107.309	0	108.309	113.06	left	1.75321	45	45	1	1	80	0	sub-14	0.156	FALSE	-5.76886	3.20617	-2.11064	0	0	3	0.4	1.32193	1.79248	0.207519
1802	1	1	3	3	(116.06106359645787, 'Miss', 'Miss')	300	118.561	1	119.561	123.479	right	0.921236	45	45	1	1	80	1	sub-14	0.109143	FALSE	-4.37114	-0.0166468	-2.22296	0	0	3	0.5	1	1.6645	0.0860017
1803	1	1	4	4	(126.47989648836688, 'Miss', 'Miss')	372	129.58	1	130.58	134.114	left	0.536834	0	315	1	1	80	1	sub-14	0.113714	FALSE	-7.06236	6.20481	-1.93352	0	0	0	0.142857	2.80735	1.75	0.0424813
1804	1	1	5	5	(137.11542329438976, 'Miss', 'Miss')	300	139.616	0	140.616	145.033	left	1.4208	45	45	1	1	80	0	sub-14	0.124571	FALSE	1.35401	0.82459	-2.78629	0	0	3	0.5	1	1.65774	0.0385011
1805	1	1	6	6	(148.03436340983603, 'Miss', 'Miss')	312	150.635	0	151.635	155.919	left	1.28813	0	315	1	1	80	1	sub-14	0.448571	TRUE	2.5587	-1.30438	-4.2047	0	0	0	0.222222	2.16993	1.68548	0.0145247
1806	1	1	7	7	(158.9199402211441, 'Miss', 'Miss')	312	161.52	1	162.52	166.238	right	0.719897	45	45	1	1	80	1	sub-14	0.237714	FALSE	-4.55212	-3.4481	5.3807	0	0	3	0.5	1	1.61719	0.0135019
1807	1	1	8	8	(169.23873951726932, 'Miss', 'Miss')	324	171.939	1	172.939	176.89	right	0.953586	0	315	1	1	80	0	sub-14	0.377714	FALSE	-4.23632	2.19419	2.50392	0	0	0	0.272727	1.87447	1.62581	0.00682863
1808	1	1	9	9	(179.89102065988118, 'Miss', 'Miss')	396	183.191	1	184.192	187.976	left	0.787602	0	315	1	1	80	1	sub-14	0.226857	FALSE	-0.344834	0.162943	4.10032	0	0	0	0.333333	1.58496	1.61433	0.0424402
1809	1	1	10	10	(190.97664052705704, 'Miss', 'Miss')	384	194.177	0	195.177	199.728	right	1.55435	45	315	0	1	20	0	sub-14	0.358857	FALSE	4.15524	8.84629	-2.75653	0	0	2	0.0769231	3.70044	1.7274	0.035439
1810	1	1	11	11	(202.72906734387198, 'Miss', 'Miss')	324	205.429	0	206.429	212.264	left	2.83732	0	315	1	1	80	1	sub-14	0.246286	FALSE	2.35385	10.7646	1.42953	0	0	0	0.357143	1.48543	1.70559	0.0320962
1811	1	1	12	12	(215.26501580333456, 'Miss', 'Miss')	396	218.565	0	219.566	224.183	left	1.6206	0	315	1	1	80	1	sub-14	0.545714	TRUE	2.15337	11.3891	-6.73283	0	0	0	0.4	1.32193	1.67742	0.0197292
1812	1	1	13	13	(227.18408159086994, 'Miss', 'Miss')	396	230.485	1	231.485	237.353	left	2.87166	0	45	0	1	20	0	sub-14	0.182857	FALSE	4.07202	15.6005	-6.0241	0	0	1	0.0625	4	1.78386	0.0286482
1813	1	1	14	14	(240.35352834793366, 'Miss', 'Miss')	312	242.954	0	243.954	249.405	left	2.45471	0	315	1	1	80	1	sub-14	0.302286	FALSE	-10.4998	7.4766	-2.20783	0	0	0	0.411765	1.28011	1.75272	0.0268061
1814	1	1	15	15	(252.40606399733224, 'Miss', 'Miss')	300	254.906	1	255.906	259.657	right	0.753568	0	315	1	1	80	0	sub-14	0	FALSE	-4.83764	0.859157	-2.04831	0	0	0	0.444444	1.16993	1.71955	0.011279
1815	1	1	16	16	(262.65821741493346, 'Miss', 'Miss')	360	265.658	1	266.659	271.16	left	1.50481	0	315	1	1	80	1	sub-14	0.251429	FALSE	-15.3492	-1.41812	9.87231	0	0	0	0.473684	1.078	1.68548	0.00896095
1816	1	1	17	17	(274.160615865366, 'Miss', 'Miss')	348	277.061	1	278.061	283.195	left	2.13663	0	315	1	1	80	1	sub-14	0.252	FALSE	-0.612453	-1.22902	-5.05054	0	0	0	0.5	1	1.6512	0.00725641
1817	1	1	18	18	(286.1964326881705, 'Miss', 'Miss')	360	289.197	0	290.197	295.031	right	1.83721	45	45	1	1	80	1	sub-14	0.273143	FALSE	4.86361	12.1498	-2.73539	0	0	3	0.285714	1.80735	1.65465	0.00200946
1818	1	1	19	19	(298.0322150551833, 'Miss', 'Miss')	336	300.833	1	301.833	306.717	right	1.8877	0	315	1	1	80	0	sub-14	0.395429	FALSE	-1.34648	9.62254	1.79419	0	0	0	0.5	1	1.62482	0.00193449
1819	1	1	20	20	(309.7179704706655, 'Miss', 'Miss')	336	312.518	0	313.518	318.186	right	1.6703	45	45	1	1	80	1	sub-14	0.718286	TRUE	-2.38334	3.0186	-1.96721	0	0	3	0.304348	1.71621	1.62581	0.00144958
1820	1	1	21	21	(321.18707830147923, 'Miss', 'Miss')	372	324.287	1	325.288	329.022	left	0.736652	0	315	1	1	80	1	sub-14	0.401143	TRUE	-1.12185	-9.36601	0.368534	0	0	0	0.5	1	1.59963	0.00140034
1821	1	1	22	22	(332.022642337512, 'Miss', 'Miss')	360	335.023	1	336.023	341.624	right	2.60532	45	45	1	1	80	1	sub-14	0.399429	FALSE	1.13645	8.60724	-5.93637	0	0	3	0.32	1.64386	1.59909	0.00108158
1822	1	1	23	23	(344.6253024244727, 'Miss', 'Miss')	312	347.225	0	348.226	352.743	right	1.52011	45	45	1	1	80	1	sub-14	0.189143	FALSE	-3.06535	11.3217	3.52579	0	0	3	0.346154	1.53051	1.5947	0.00820132
1823	1	1	24	24	(355.74421901454775, 'Miss', 'Miss')	360	358.745	1	359.745	363.646	left	0.903456	0	315	1	1	80	1	sub-14	0.82	TRUE	-5.11468	-6.58325	3.68968	0	0	0	0.481481	1.05445	1.57442	0.000829217
1824	1	1	25	25	(366.6465052201079, 'Miss', 'Miss')	372	369.747	1	370.747	375.065	left	1.32062	0	315	1	1	80	1	sub-14	1	TRUE	-1.12519	-2.72055	-8.74711	0	0	0	0.5	1	1.55375	0.00369144
1825	1	1	26	26	(378.06555977205926, 'Miss', 'Miss')	372	381.166	1	382.166	386.167	right	1.00496	45	45	1	1	80	1	sub-14	1	TRUE	1.48184	3.53314	-3.24007	0	0	3	0.344828	1.53605	1.55165	0.000650122
1826	1	1	27	27	(389.16789042059645, 'Miss', 'Miss')	384	392.368	0	393.368	397.169	left	0.80399	0	315	1	1	80	1	sub-14	0.377143	FALSE	-1.92019	6.23029	-2.10823	0	0	0	0.5	1	1.53311	0.000632724
1827	1	1	28	28	(400.17018109264814, 'Miss', 'Miss')	396	403.471	1	404.471	408.472	right	1.00502	45	315	0	1	20	0	sub-14	0.135429	FALSE	0.712291	-1.97484	-2.42498	0	0	2	0.0645161	3.9542	1.59973	0.00828553
1828	1	1	29	29	(411.4724990352656, 'Miss', 'Miss')	312	414.073	1	415.073	419.207	right	1.13813	45	315	0	1	20	0	sub-14	0.212	FALSE	0.792938	5.13318	1.49772	0	0	2	0.09375	3.41504	1.64883	0.0310143
1829	1	1	30	30	(422.2080558305886, 'Miss', 'Miss')	360	425.208	0	426.209	432.06	right	2.85376	45	315	0	1	20	0	sub-14	0.681143	TRUE	0.898129	1.12602	-3.79034	0	0	2	0.121212	3.04439	1.6856	0.0209145
1830	1	1	31	31	(435.0606771478483, 'Miss', 'Miss')	396	438.361	1	439.361	443.896	left	1.53852	0	45	0	1	20	0	sub-14	0.416	TRUE	-4.83751	-1.35318	-1.67412	0	0	1	0.0588235	4.08746	1.7459	0.0112405
1831	1	1	32	32	(446.89656410289126, 'Miss', 'Miss')	384	450.097	1	451.097	455.498	left	1.40404	45	45	1	1	80	0	sub-14	0.475429	TRUE	-7.06226	-2.60403	3.63443	0	0	3	0.314286	1.66985	1.74259	0.00812834
1832	1	1	33	33	(458.4989390002106, 'Miss', 'Miss')	324	461.199	0	462.199	466.05	left	0.853013	0	315	1	1	80	1	sub-14	0.349714	FALSE	-1.82926	7.88997	-5.66897	0	0	0	0.444444	1.16993	1.72645	0.000728
1833	1	1	34	34	(469.0511011011149, 'Miss', 'Miss')	384	472.251	1	473.252	478.269	left	2.02111	0	45	0	1	20	0	sub-14	0.706857	TRUE	2.01167	1.99894	-3.56189	0	0	1	0.0810811	3.62449	1.77119	0.00481376
1834	1	1	35	35	(481.27033259270956, 'Miss', 'Miss')	348	484.171	0	485.171	489.922	right	1.75337	45	45	1	1	80	1	sub-14	0.646857	TRUE	3.35421	4.18795	-7.29154	0	0	3	0.315789	1.66297	1.7674	0.0051115
1835	1	1	36	36	(492.92273746545766, 'Miss', 'Miss')	300	495.423	1	496.423	500.291	left	0.871308	0	315	1	1	80	1	sub-14	0.535429	TRUE	-7.35969	-6.19478	5.18324	0	0	0	0.435897	1.19794	1.75258	0.000637486
1836	1	1	37	37	(503.2915625756841, 'Miss', 'Miss')	396	506.592	1	507.592	511.56	left	0.969845	0	315	1	1	80	1	sub-14	0.779429	TRUE	-10.9858	-17.0033	6.88874	0	0	0	0.45	1.152	1.73741	0.00221189
1837	1	1	38	38	(514.5605837954026, 'Miss', 'Miss')	372	517.661	0	518.661	523.529	right	1.8701	45	315	0	1	20	0	sub-14	0.604571	TRUE	-1.19997	-0.76247	0.133898	0	0	2	0.121951	3.03562	1.76551	0.00247387
1838	1	1	39	39	(526.529724778125, 'Miss', 'Miss')	360	529.53	0	530.53	534.964	left	1.43832	0	315	1	1	80	1	sub-14	0.512571	TRUE	-3.0143	10.436	-0.414621	0	0	0	0.452381	1.14439	1.75059	0.0024086
1839	1	1	40	40	(537.9653833040329, 'Miss', 'Miss')	372	541.066	1	542.066	546.684	right	1.62	45	45	1	1	80	1	sub-14	0.695429	TRUE	1.15409	13.5711	-8.43777	0	0	3	0.302326	1.72583	1.74917	0.000540906
1840	1	1	41	41	(549.6844254552284, 'Miss', 'Miss')	312	552.285	1	553.285	557.469	right	1.18843	45	315	0	1	20	0	sub-14	1	TRUE	-0.536918	-1.29036	1.86836	0	0	2	0.136364	2.87447	1.77201	0.00226854
1841	1	1	42	42	(560.4700211034788, 'Miss', 'Miss')	396	563.77	0	564.771	569.688	left	1.91993	45	45	1	1	80	0	sub-14	0.844	TRUE	-0.332932	0.891641	-8.2241	0	0	3	0.311111	1.6845	1.76936	0.00216927
1842	1	1	43	43	(572.6892417756219, 'Miss', 'Miss')	360	575.69	0	576.69	581.174	right	1.4882	45	45	1	1	80	1	sub-14	1	TRUE	-0.236209	-0.576086	1.00309	0	0	3	0.326087	1.61667	1.76544	0.00284555
1843	1	1	44	44	(584.1749080832121, 'Miss', 'Miss')	360	587.175	1	588.175	592.176	left	1.00484	45	45	1	1	80	0	sub-14	0.598286	TRUE	1.11889	-0.924421	-0.972394	0	0	3	0.340426	1.55459	1.76044	0.00255213
1844	1	1	45	45	(595.1772159554173, 'Miss', 'Miss')	408	598.578	0	599.578	603.145	left	0.569763	0	315	1	1	80	1	sub-14	1	TRUE	-0.492579	-1.18021	2.67968	0	0	0	0.416667	1.26303	1.74987	0.000390113
1845	1	1	46	46	(606.1461255683332, 'Miss', 'Miss')	348	609.046	0	610.047	613.831	left	0.786321	0	315	1	1	80	1	sub-14	0.381143	FALSE	0.551176	11.7494	-12.5701	0	0	0	0.428571	1.22239	1.73894	0.00160786
1846	1	1	47	47	(616.8316723625992, 'Miss', 'Miss')	324	619.532	1	620.532	624.366	right	0.838285	45	315	0	1	20	0	sub-14	0.530857	TRUE	2.16501	11.3463	-2.07025	0	0	2	0.14	2.8365	1.75881	0.00145456
1847	1	1	48	48	(627.3671794439301, 'Miss', 'Miss')	372	630.468	1	631.468	636.219	left	1.75391	45	45	1	1	80	0	sub-14	0.341714	FALSE	-4.17028	-1.66018	4.81291	0	0	3	0.333333	1.58496	1.75494	0.00159877
1848	1	1	49	49	(639.2196484566052, 'Miss', 'Miss')	384	642.42	0	643.42	647.738	left	1.32082	45	45	1	1	80	0	sub-14	1	TRUE	0.935887	2.24633	1.60567	0	0	3	0.346154	1.53051	1.75022	0.00202996
1849	1	1	50	50	(650.7386977652839, 'Miss', 'Miss')	372	653.839	1	654.839	658.357	right	0.521234	45	45	1	1	80	1	sub-14	1	TRUE	-6.84723	-16.4472	-3.27319	0	0	3	0.358491	1.47999	1.74478	0.00184966
1850	1	1	51	51	(661.3575701065772, 'Miss', 'Miss')	300	663.858	0	664.858	668.675	left	0.820866	0	315	1	1	80	1	sub-14	0.814286	TRUE	0.277578	3.76883	3.15069	0	0	0	0.407407	1.29546	1.73626	0.000288184
1851	1	1	52	52	(671.6763527573928, 'Miss', 'Miss')	372	674.777	0	675.777	680.178	left	1.40335	0	45	0	1	20	0	sub-14	0	FALSE	-11.2083	-6.8122	-2.51743	0	0	1	0.0727273	3.78136	1.77003	0.00261541
1852	1	1	53	53	(683.1787367818902, 'Miss', 'Miss')	408	686.579	0	687.579	693.481	right	2.90511	45	45	1	1	80	1	sub-14	0.796571	TRUE	2.52782	4.23752	2.24773	0	0	3	0.357143	1.48543	1.76464	0.00264192
1853	1	1	54	54	(696.4814924961556, 'Miss', 'Miss')	384	699.682	0	700.682	704.766	left	1.08776	45	45	1	1	80	0	sub-14	0.798286	TRUE	-0.664932	-2.05824	10.8329	0	0	3	0.368421	1.44057	1.75869	0.00153044
1854	1	1	55	55	(707.7671265673293, 'Miss', 'Miss')	396	711.068	0	712.068	716.902	right	1.83733	45	45	1	1	80	1	sub-14	1	TRUE	0.160263	0.374923	-4.60297	0	0	3	0.37931	1.39855	1.75224	0.00141009
1855	1	1	56	56	(719.9030061152093, 'Miss', 'Miss')	312	722.503	0	723.503	727.854	left	1.35506	0	315	1	1	80	1	sub-14	1	TRUE	0.112734	0.263487	-3.40852	0	0	0	0.389831	1.35908	1.74538	0.000233913
1856	1	1	57	57	(730.8552892830005, 'Miss', 'Miss')	300	733.355	0	734.356	741.407	left	4.05509	0	45	0	1	20	0	sub-14	0.722857	TRUE	1.39884	5.48214	-1.41845	1	1	1	0.0833333	3.58496	1.77351	0.00193554
1857	1	1	58	58	(744.4080339697482, 'Miss', 'Miss')	396	747.708	0	748.709	752.793	right	1.08636	0	45	0	1	20	1	sub-14	0.598286	TRUE	-5.2182	-2.98657	4.97953	0	0	1	0.0983607	3.34577	1.79722	0.00750054
1858	1	1	59	59	(755.7937266046704, 'Miss', 'Miss')	384	758.994	1	759.994	764.328	right	1.33714	45	45	1	1	80	1	sub-14	0.800571	TRUE	-3.25512	3.30646	0.222251	0	0	3	0.370968	1.43063	1.79109	0.00155837
1859	1	1	60	60	(767.329443416905, 'Miss', 'Miss')	396	770.63	0	771.63	775.531	left	0.904748	0	315	1	1	80	1	sub-14	1	TRUE	-0.148278	-0.336345	4.95376	0	0	0	0.380952	1.39232	1.78458	0.000226862
1860	1	1	61	61	(778.5317485703761, 'Miss', 'Miss')	384	781.732	1	782.732	786.5	left	0.770836	45	45	1	1	80	0	sub-14	0.867429	TRUE	-0.0665045	-3.0951	4.02829	0	0	3	0.375	1.41504	1.77861	0.000214948
1861	1	1	62	62	(789.5006848157877, 'Miss', 'Miss')	360	792.501	0	793.501	798.302	left	1.80318	0	45	0	1	20	0	sub-14	0.405143	TRUE	-8.16864	-5.03328	2.58582	0	0	1	0.107692	3.21501	1.79905	0.00126501
1862	1	1	63	63	(801.3030986076476, 'Miss', 'Miss')	360	804.303	1	805.304	809.338	left	1.03716	0	315	1	1	80	1	sub-14	1	TRUE	0.258031	0.609275	-1.14507	0	0	0	0.378788	1.40054	1.79284	0.00123881
1863	1	1	64	64	(812.3386901639258, 'Miss', 'Miss')	300	814.839	1	815.839	820.073	left	1.23709	0	45	0	1	20	0	sub-14	0.812	TRUE	0.207521	1.84458	0.82919	0	0	1	0.119403	3.06609	1.81045	0.00105623
1864	1	1	65	65	(823.0742783079156, 'Miss', 'Miss')	372	826.175	1	827.175	831.226	right	1.05375	45	45	1	1	80	1	sub-14	0.819429	TRUE	3.08342	7.35353	-2.00813	0	0	3	0.367647	1.44361	1.80487	0.00105019
1865	1	1	66	66	(834.2265537633798, 'Miss', 'Miss')	408	837.627	0	838.627	842.478	right	0.853731	0	315	1	1	80	0	sub-14	1	TRUE	-0.249291	-0.594024	3.89849	0	0	0	0.376812	1.40808	1.79896	0.000197852
1866	1	1	67	67	(845.4788952729816, 'Miss', 'Miss')	360	848.479	1	849.479	852.697	right	0.219978	45	45	1	1	80	1	sub-14	0.809143	TRUE	-0.219954	1.46028	1.99332	0	0	3	0.371429	1.42884	1.7935	0.000188328
1867	1	1	68	68	(855.6976917671466, 'Miss', 'Miss')	312	858.298	0	859.298	862.999	right	0.703591	45	45	1	1	80	1	sub-14	0.534857	TRUE	0.447768	1.13158	-0.623622	0	0	3	0.380282	1.39486	1.78774	0.00093615
1868	1	1	69	69	(865.9997051005946, 'Miss', 'Miss')	324	868.7	0	869.7	873.751	left	1.05483	0	315	1	1	80	1	sub-14	0.816571	TRUE	-10.3578	-13.1163	9.65938	0	0	0	0.375	1.41504	1.78241	0.00017154
1869	1	1	70	70	(876.7519563093908, 'Miss', 'Miss')	396	880.052	1	881.053	884.853	right	0.804019	45	315	0	1	20	0	sub-14	0.538286	TRUE	5.91509	15.8948	-3.75704	0	0	2	0.109589	3.18982	1.80039	0.000990727
1870	1	1	71	71	(887.8542733642585, 'Miss', 'Miss')	396	891.155	1	892.155	896.606	left	1.45386	45	45	1	1	80	0	sub-14	1	TRUE	-2.39677	-5.75215	11.9389	0	0	3	0.378378	1.4021	1.79487	0.000972283
1871	1	1	72	72	(899.6067409620823, 'Miss', 'Miss')	324	902.307	1	903.307	907.475	right	1.17005	45	45	1	1	80	1	sub-14	1	TRUE	-2.42749	-5.84037	-7.83713	0	0	3	0.386667	1.37084	1.78909	0.00081625
1872	1	1	73	73	(910.4755945080465, 'Miss', 'Miss')	336	913.276	1	914.276	917.843	left	0.570426	0	315	1	1	80	1	sub-14	1	TRUE	7.92884	19.0128	-19.5672	0	0	0	0.368421	1.44057	1.78436	0.000154801
1873	1	1	74	74	(920.8444703864682, 'Miss', 'Miss')	300	923.345	0	924.345	928.096	right	0.754131	45	45	1	1	80	1	sub-14	0.807429	TRUE	1.47254	0.463893	7.46924	0	0	3	0.38961	1.3599	1.77873	0.000148798
1874	1	1	75	75	(931.0965269838505, 'Miss', 'Miss')	372	934.197	0	935.197	938.964	left	0.771338	0	315	1	1	80	1	sub-14	1	TRUE	-0.772259	-1.86254	3.36664	0	0	0	0.371795	1.42742	1.77409	0.000142061
1875	1	1	76	76	(941.9654193688709, 'Miss', 'Miss')	396	945.266	0	946.266	950.217	right	0.954728	45	45	1	1	80	1	sub-14	0.573714	TRUE	-6.53429	1.81733	-1.2402	0	0	3	0.392405	1.34958	1.76861	0.0001367
1876	1	1	77	77	(953.217684032626, 'Miss', 'Miss')	336	956.018	0	957.018	960.719	left	0.703852	0	315	1	1	80	1	sub-14	0.552	TRUE	-6.70064	0.392069	8.08941	0	0	0	0.375	1.41504	1.76406	0.000130686
1877	1	1	78	78	(963.719902158869, 'Miss', 'Miss')	372	966.82	0	967.82	971.821	left	1.00394	0	315	1	1	80	1	sub-14	0.607429	TRUE	1.97416	7.60684	1.08438	0	0	0	0.382716	1.38565	1.75928	0.000711468
1878	1	1	79	79	(974.8221454195298, 'Miss', 'Miss')	384	978.022	1	979.023	982.923	left	0.904143	0	315	1	1	80	1	sub-14	0.556571	TRUE	-1.13575	-11.9502	4.99074	0	0	0	0.390244	1.35755	1.75427	0.000672351
1879	1	1	80	80	(985.9244347322144, 'Miss', 'Miss')	348	988.825	0	989.825	993.542	right	0.721161	45	45	1	1	80	1	sub-14	0.438857	TRUE	-2.3986	5.24055	-14.9839	0	0	3	0.385542	1.37504	1.7496	0.000115676
1880	1	1	81	81	(996.5432879314014, 'Miss', 'Miss')	360	999.544	0	1000.54	1005.13	right	1.58673	45	45	1	1	80	1	sub-14	0.618857	TRUE	1.85297	5.69074	-15.9125	0	0	3	0.392857	1.34792	1.74472	0.000633632
1881	1	1	82	82	(1008.1290022607104, 'Miss', 'Miss')	408	1011.53	1	1012.53	1016.85	left	1.32015	0	315	1	1	80	1	sub-14	1	TRUE	4.21677	7.51021	16.9549	0	0	0	0.388235	1.365	1.74015	0.000107006
1882	1	1	83	83	(1019.8480868574461, 'Miss', 'Miss')	396	1023.15	0	1024.15	1028.52	left	1.37151	0	315	1	1	80	1	sub-14	1	TRUE	-13.5222	-16.0295	14.5179	0	0	0	0.395349	1.3388	1.73539	0.000598146
1883	1	1	84	84	(1031.5171711628886, 'Miss', 'Miss')	336	1034.32	1	1035.32	1039.6	left	1.28791	0	315	1	1	80	1	sub-14	1	TRUE	-0.872119	-2.03791	-7.66974	0	0	0	0.402299	1.31366	1.73046	0.000567656
1884	1	1	85	85	(1042.6028157206074, 'Miss', 'Miss')	384	1045.8	0	1046.8	1051.79	left	1.98848	0	45	0	1	20	0	sub-14	1	TRUE	1.98249	2.93791	-12.8676	0	0	1	0.102273	3.28951	1.7472	0.000728519
1885	1	1	86	86	(1054.7885990169837, 'Miss', 'Miss')	324	1057.49	1	1058.49	1062.39	right	0.904162	45	45	1	1	80	1	sub-14	1	TRUE	0.883334	2.20967	-5.65384	0	0	3	0.382022	1.38827	1.74307	0.000731157
1886	1	1	87	87	(1065.3908229968272, 'Miss', 'Miss')	348	1068.29	0	1069.29	1073.13	left	0.837379	0	315	1	1	80	1	sub-14	1	TRUE	1.3726	3.40324	3.39827	0	0	0	0.4	1.32193	1.73831	9.5446e-05
1887	1	1	88	88	(1076.1263578758255, 'Miss', 'Miss')	360	1079.13	0	1080.13	1083.84	right	0.721073	45	315	0	1	20	0	sub-14	1	TRUE	1.91427	4.69788	16.791	0	0	2	0.0989011	3.33787	1.75494	0.000710493
1888	1	1	89	89	(1086.8452147092382, 'Miss', 'Miss')	408	1090.25	1	1091.25	1095.36	left	1.12147	0	315	1	1	80	1	sub-14	1	TRUE	-0.712806	-1.65331	5.67133	0	0	0	0.402174	1.31411	1.75008	0.000700867
1889	1	1	90	90	(1098.364238217687, 'Miss', 'Miss')	324	1101.06	0	1102.06	1105.85	right	0.787942	45	45	1	1	80	1	sub-14	1	TRUE	-0.562448	-1.35761	0.547095	0	0	3	0.376344	1.40988	1.74632	9.14986e-05
1890	1	1	91	91	(1108.8497319688988, 'Miss', 'Miss')	300	1111.35	1	1112.35	1116.83	right	1.48685	45	45	1	1	80	1	sub-14	0.765143	TRUE	-0.737852	-4.95955	-4.58585	0	0	3	0.382979	1.38466	1.74239	0.000527444
1891	1	1	92	92	(1119.8353379372413, 'Miss', 'Miss')	408	1123.24	1	1124.24	1128.34	left	1.10451	0	45	0	1	20	0	sub-14	0.951429	TRUE	6.77197	16.9756	-19.5635	0	0	1	0.105263	3.24793	1.75742	0.000616853
1892	1	1	93	93	(1131.337711419709, 'Miss', 'Miss')	324	1134.04	1	1135.04	1138.84	left	0.803638	0	315	1	1	80	1	sub-14	1	TRUE	4.4562	10.6033	0.0817628	0	0	0	0.395833	1.33703	1.75297	0.000603099
1893	1	1	94	94	(1141.8398194094855, 'Miss', 'Miss')	336	1144.64	1	1145.64	1149.39	right	0.754761	45	45	1	1	80	1	sub-14	1	TRUE	-1.22376	-3.00163	5.49693	0	0	3	0.381443	1.39046	1.74915	8.46069e-05
1894	1	1	95	95	(1152.392036439912, 'Miss', 'Miss')	408	1155.79	0	1156.79	1160.39	left	0.604863	0	315	1	1	80	1	sub-14	0.6	TRUE	-4.07336	12.7107	-5.64718	0	0	0	0.397959	1.32931	1.7448	8.20065e-05
1895	1	1	96	96	(1163.394274679238, 'Miss', 'Miss')	324	1166.09	1	1167.09	1170.96	right	0.871161	45	45	1	1	80	1	sub-14	1	TRUE	0.695625	1.65855	11.3754	0	0	3	0.383838	1.38143	1.74105	7.91399e-05
1896	1	1	97	97	(1173.9631520002529, 'Miss', 'Miss')	324	1176.66	0	1177.66	1181.15	right	0.48676	45	45	1	1	80	1	sub-14	1	TRUE	-2.49138	-5.9831	1.51294	0	0	3	0.39	1.35845	1.73715	0.000452298
1897	1	1	98	98	(1184.148561609424, 'Miss', 'Miss')	360	1187.15	0	1188.15	1192.55	right	1.40461	45	45	1	1	80	1	sub-14	1	TRUE	0.486227	1.16272	-3.98948	0	0	3	0.39604	1.33628	1.73311	0.000432232
1898	1	1	99	99	(1195.5508621022084, 'Miss', 'Miss')	372	1198.65	0	1199.65	1205.22	right	2.57053	45	315	0	1	20	0	sub-14	0.476571	TRUE	-2.97484	5.79363	-2.39644	0	0	2	0.0980392	3.3505	1.74821	0.000576189
1899	1	1	100	100	(1208.220178332301, 'Miss', 'Miss')	300	1210.72	1	1211.72	1215.54	left	0.819726	0	315	1	1	80	1	sub-14	0.613714	TRUE	-1.64668	-8.97552	-3.31431	0	0	0	0.38835	1.36457	1.74441	0.000573307
1900	1	2	101	1	(1503.645087317134, 'Miss', 'Miss')	300	1506.15	0	1507.15	1511.25	left	1.10338	0	315	1	1	80	1	sub-14	0.0331429	FALSE	-8.39592	-11.4934	8.89935	0	0	0	0.394231	1.34289	1.74049	0.000410741
1901	1	2	102	2	(1514.2497157119794, 'Miss', 'Miss')	336	1517.05	0	1518.05	1522.25	left	1.20341	0	45	0	1	20	0	sub-14	0.181143	FALSE	5.96709	-1.1709	2.15585	0	0	1	0.104762	3.25481	1.75424	0.000505284
1902	1	2	103	3	(1525.2519472931815, 'Miss', 'Miss')	360	1528.25	1	1529.25	1533.84	right	1.58846	45	45	1	1	80	1	sub-14	0.262857	FALSE	-5.62055	3.43719	3.19992	0	0	3	0.386792	1.37037	1.75055	0.000503
1903	1	2	104	4	(1536.8377035131869, 'Miss', 'Miss')	360	1539.84	1	1540.84	1544.94	right	1.10306	45	45	1	1	80	1	sub-14	0.130286	FALSE	-6.05631	-5.98739	2.55633	0	0	3	0.392523	1.34915	1.74674	0.000390807
1904	1	2	105	5	(1547.9399173671338, 'Miss', 'Miss')	300	1550.44	0	1551.44	1555.74	right	1.30328	45	45	1	1	80	1	sub-14	0.329143	FALSE	-1.07061	9.23363	3.58323	0	0	3	0.398148	1.32862	1.74281	0.000374631
1905	1	2	106	6	(1558.7421738608157, 'Miss', 'Miss')	336	1561.54	0	1562.54	1566.79	right	1.25346	45	45	1	1	80	1	sub-14	0.617143	TRUE	-1.07393	-0.22726	-4.93746	0	0	3	0.40367	1.30875	1.73878	0.000359383
1906	1	2	107	7	(1569.7944079526853, 'Miss', 'Miss')	348	1572.69	1	1573.69	1577.88	right	1.1874	45	45	1	1	80	1	sub-14	0.245714	FALSE	-4.88377	-14.4944	2.12719	0	0	3	0.409091	1.28951	1.73465	0.000344995
1907	1	2	108	8	(1580.8799537482325, 'Miss', 'Miss')	312	1583.48	1	1584.48	1588.31	right	0.837265	45	45	1	1	80	1	sub-14	0.126286	FALSE	-8.24741	-5.39542	0.500026	0	0	3	0.414414	1.27085	1.73042	0.000331403
1908	1	2	109	9	(1591.3154832729895, 'Miss', 'Miss')	336	1594.12	1	1595.12	1598.89	left	0.778227	0	315	1	1	80	1	sub-14	0.359429	FALSE	3.92668	6.87013	0.00972022	0	0	0	0.375	1.41504	1.72754	5.99072e-05
1909	1	2	110	10	(1601.8926596680537, 'Miss', 'Miss')	384	1605.09	0	1606.09	1609.69	right	0.603235	45	45	1	1	80	1	sub-14	0.517714	TRUE	-0.0937647	-2.01306	7.2993	0	0	3	0.415929	1.26559	1.72341	5.85081e-05
1910	1	2	111	11	(1612.6949050648625, 'Miss', 'Miss')	384	1615.9	1	1616.9	1620.33	left	0.436431	0	315	1	1	80	1	sub-14	0.737143	TRUE	1.47642	-6.42936	-3.3018	0	0	0	0.377193	1.40663	1.72056	5.6539e-05
1911	1	2	112	12	(1623.330424657918, 'Miss', 'Miss')	348	1626.23	1	1627.23	1630.91	right	0.686427	45	315	0	1	20	0	sub-14	0.492	TRUE	12.0028	20.5336	-19.3113	0	0	2	0.0956522	3.38606	1.73443	0.000475507
1912	1	2	113	13	(1633.915919269138, 'Miss', 'Miss')	348	1636.82	0	1637.82	1641.75	right	0.938279	45	315	0	1	20	0	sub-14	0.456571	TRUE	-3.23834	-8.24237	14.2711	0	0	2	0.103448	3.27302	1.74713	0.00190401
1913	1	2	114	14	(1644.7513751106565, 'Miss', 'Miss')	312	1647.35	1	1648.35	1651.9	left	0.553244	0	315	1	1	80	1	sub-14	0.761714	TRUE	-8.62257	-14.8854	19.9795	0	0	0	0.376068	1.41093	1.7442	0.000424135
1914	1	2	115	15	(1654.9034572031053, 'Miss', 'Miss')	336	1657.7	1	1658.7	1662.52	left	0.82039	0	315	1	1	80	1	sub-14	0.733714	TRUE	-9.33099	-2.05255	-3.85224	0	0	0	0.381356	1.39079	1.74114	0.000336835
1915	1	2	116	16	(1665.5224008418088, 'Miss', 'Miss')	324	1668.22	0	1669.22	1673.16	left	0.93693	0	315	1	1	80	1	sub-14	0.312	FALSE	-1.89721	15.9714	-5.78161	0	0	0	0.386555	1.37126	1.73798	0.000323958
1916	1	2	117	17	(1676.157894912056, 'Miss', 'Miss')	372	1679.26	0	1680.26	1684.18	left	0.919666	0	315	1	1	80	1	sub-14	0.919429	TRUE	0.476345	3.55074	0.937913	0	0	0	0.391667	1.3523	1.73472	0.000311767
1917	1	2	118	18	(1687.176825900324, 'Miss', 'Miss')	348	1690.08	1	1691.08	1695.03	left	0.953225	0	315	1	1	80	1	sub-14	1	TRUE	3.65498	8.75559	-14.6173	0	0	0	0.396694	1.3339	1.73136	0.000300214
1918	1	2	119	19	(1698.0290593818652, 'Miss', 'Miss')	312	1700.63	0	1701.63	1705.36	left	0.73647	0	45	0	1	20	0	sub-14	0.607429	TRUE	2.93133	13.4045	-6.55059	0	0	1	0.0983607	3.34577	1.74406	0.000404209
1919	1	2	120	20	(1708.3644973296762, 'Miss', 'Miss')	360	1711.36	0	1712.36	1716.52	left	1.1533	0	315	1	1	80	1	sub-14	0.98	TRUE	2.76832	6.67751	7.87932	0	0	0	0.398374	1.3278	1.74063	0.000400068
1920	1	2	121	21	(1719.5167791658425, 'Miss', 'Miss')	360	1722.52	1	1723.52	1727.55	right	1.03737	45	45	1	1	80	1	sub-14	0.558286	TRUE	-2.63751	2.50632	-1.73598	0	0	3	0.387097	1.36923	1.73758	4.97176e-05
1921	1	2	122	22	(1730.552398464304, 'Miss', 'Miss')	408	1733.95	1	1734.95	1738.69	right	0.737039	45	45	1	1	80	1	sub-14	0.263429	FALSE	-7.64437	-10.1358	2.30466	0	0	3	0.392	1.35107	1.73445	0.000286898
1922	1	2	123	23	(1741.6879911580115, 'Miss', 'Miss')	300	1744.19	1	1745.19	1748.69	left	0.503974	0	315	1	1	80	1	sub-14	0.436571	TRUE	0.747357	0.868293	-0.448729	0	0	0	0.396825	1.33342	1.73122	4.71888e-05
1923	1	2	124	24	(1751.690042137602, 'Miss', 'Miss')	408	1755.09	0	1756.09	1759.99	right	0.904144	45	45	1	1	80	1	sub-14	0.345143	FALSE	-0.71564	-0.894885	3.22496	0	0	3	0.393701	1.34483	1.72813	4.59667e-05
1924	1	2	125	25	(1762.9923792223256, 'Miss', 'Miss')	348	1765.89	0	1766.89	1771.13	right	1.23724	45	45	1	1	80	1	sub-14	0.897714	TRUE	-1.26176	-5.21329	-2.40248	0	0	3	0.398438	1.32757	1.72496	0.000266295
1925	1	2	126	26	(1774.1280071486055, 'Miss', 'Miss')	336	1776.93	0	1777.93	1782.4	left	1.47	0	315	1	1	80	1	sub-14	0.497143	TRUE	-6.07523	-1.11006	4.32369	0	0	0	0.395349	1.3388	1.72193	4.36879e-05
1926	1	2	127	27	(1785.396947083728, 'Miss', 'Miss')	408	1788.8	0	1789.8	1793.71	left	0.921226	0	315	1	1	80	1	sub-14	0.310286	FALSE	-3.0428	3.84942	7.71553	0	0	0	0.4	1.32193	1.71881	0.000256475
1927	1	2	128	28	(1796.7159827432527, 'Miss', 'Miss')	336	1799.52	1	1800.52	1804.28	right	0.770754	45	45	1	1	80	1	sub-14	0.461143	TRUE	-20.3759	-14.2676	14.3569	0	0	3	0.396947	1.33298	1.71583	4.15578e-05
1928	1	2	129	29	(1807.2847871023262, 'Miss', 'Miss')	360	1810.29	1	1811.29	1815.24	right	0.954288	45	45	1	1	80	1	sub-14	0.256571	FALSE	-8.89629	-0.683596	4.51339	0	0	3	0.401515	1.31647	1.71276	0.000247185
1929	1	2	130	30	(1818.237044469887, 'Miss', 'Miss')	348	1821.14	1	1822.14	1825.94	right	0.803417	45	45	1	1	80	1	sub-14	0.277143	FALSE	-6.76689	-1.25561	3.23856	0	0	3	0.406015	1.30039	1.70963	0.000238953
1930	1	2	131	31	(1828.9392093866234, 'Miss', 'Miss')	348	1831.84	1	1832.84	1836.96	left	1.12054	0	315	1	1	80	1	sub-14	0.34	FALSE	-3.73394	-7.18669	12.4986	0	0	0	0.395522	1.33817	1.70681	3.86325e-05
1931	1	2	132	32	(1839.9581664525433, 'Miss', 'Miss')	312	1842.56	1	1843.56	1847.49	left	0.938158	0	315	1	1	80	1	sub-14	0.592571	TRUE	-11.5033	-1.77659	7.80287	0	0	0	0.4	1.32193	1.70393	0.000237814
1932	1	2	133	33	(1850.4936568885644, 'Miss', 'Miss')	336	1853.29	0	1854.29	1857.98	right	0.687898	45	45	1	1	80	1	sub-14	0.171429	FALSE	-0.12492	-18.1082	7.01325	0	0	3	0.404412	1.3061	1.70097	3.68229e-05
1933	1	2	134	34	(1860.9791548011037, 'Miss', 'Miss')	312	1863.58	0	1864.58	1868.5	right	0.919853	45	45	1	1	80	1	sub-14	0.852	TRUE	13.1968	17.0935	-19.6932	0	0	3	0.408759	1.29068	1.69794	0.000222639
1934	1	2	135	35	(1871.497966636696, 'Miss', 'Miss')	324	1874.2	0	1875.2	1878.88	right	0.687424	45	45	1	1	80	1	sub-14	0.313143	FALSE	-1.69662	9.70862	-2.12906	0	0	3	0.413043	1.27563	1.69485	0.000215559
1935	1	2	136	36	(1881.8834265147023, 'Miss', 'Miss')	408	1885.28	0	1886.28	1890.32	left	1.03824	0	315	1	1	80	1	sub-14	0.463429	TRUE	-5.94881	10.6235	-6.22476	0	0	0	0.395683	1.33758	1.69224	3.43582e-05
1936	1	2	137	37	(1893.3190722792062, 'Miss', 'Miss')	312	1895.92	0	1896.92	1900.94	left	1.02012	0	315	1	1	80	1	sub-14	0.254286	FALSE	-8.55871	-6.46106	10.7533	0	0	0	0.4	1.32193	1.68956	0.000221118
1937	1	2	138	38	(1903.9379282526113, 'Miss', 'Miss')	372	1907.04	1	1908.04	1911.54	right	0.503572	45	45	1	1	80	1	sub-14	0.837714	TRUE	2.65809	9.2698	-2.00349	0	0	3	0.411348	1.28157	1.68663	3.28091e-05
1938	1	2	139	39	(1914.540073999499, 'Miss', 'Miss')	336	1917.34	0	1918.34	1922.14	right	0.804802	45	45	1	1	80	1	sub-14	0.401714	TRUE	-6.17341	-14.2757	0.0713125	0	0	3	0.415493	1.2671	1.68365	0.000201526
1939	1	2	140	40	(1925.1423054697323, 'Miss', 'Miss')	324	1927.84	1	1928.84	1932.61	left	0.769967	0	315	1	1	80	1	sub-14	0.470857	TRUE	-5.62578	-4.79477	5.03953	0	0	0	0.398601	1.32698	1.68112	3.13519e-05
1940	1	2	141	41	(1935.6110815040367, 'Miss', 'Miss')	360	1938.61	0	1939.61	1943.23	right	0.621571	45	45	1	1	80	1	sub-14	0.479429	TRUE	5.95658	9.49298	0.609837	0	0	3	0.416667	1.26303	1.67819	3.07168e-05
1941	1	2	142	42	(1946.22990224487, 'Miss', 'Miss')	300	1948.73	1	1949.73	1954	left	1.27011	0	315	1	1	80	1	sub-14	0.250857	FALSE	3.20375	0.254444	3.85778	0	0	0	0.4	1.32193	1.6757	2.998e-05
1942	1	2	143	43	(1956.9988120797232, 'Miss', 'Miss')	384	1960.2	1	1961.2	1965.98	left	1.78856	0	315	1	1	80	1	sub-14	0.497714	TRUE	-9.41477	2.12639	-2.43871	0	0	0	0.40411	1.30718	1.67314	0.000199847
1943	1	2	144	44	(1968.9845894947568, 'Miss', 'Miss')	312	1971.58	0	1972.58	1976.54	left	0.954183	0	45	0	1	20	0	sub-14	0.383429	FALSE	1.40516	8.27543	-2.76274	0	0	1	0.0884354	3.49923	1.68515	0.00031488
1944	1	2	145	45	(1979.5367635247997, 'Miss', 'Miss')	324	1982.24	0	1983.24	1987.1	left	0.871291	0	315	1	1	80	1	sub-14	0.780571	TRUE	-6.83802	-6.84162	2.07259	0	0	0	0.405405	1.30256	1.68253	0.000312308
1945	1	2	146	46	(1990.1056050583986, 'Miss', 'Miss')	396	1993.41	1	1994.41	1998.59	left	1.18676	0	45	0	1	20	0	sub-14	0.845143	TRUE	7.82452	10.0499	-1.22777	0	0	1	0.0939597	3.41181	1.69376	0.000285918
1946	1	2	147	47	(2001.5912538884138, 'Miss', 'Miss')	324	2004.29	1	2005.29	2009.38	right	1.08646	45	45	1	1	80	1	sub-14	0.560571	TRUE	-2.11416	-4.34609	3.81715	0	0	3	0.406667	1.29808	1.69109	0.000283592
1947	1	2	148	48	(2012.3768384397906, 'Miss', 'Miss')	336	2015.18	0	2016.18	2020.48	left	1.30438	0	45	0	1	20	0	sub-14	0.248	FALSE	0.548123	4.33583	-0.628798	0	0	1	0.0993377	3.33151	1.70161	0.000260959
1948	1	2	149	49	(2023.4790603389708, 'Miss', 'Miss')	408	2026.88	1	2027.88	2031.48	left	0.604294	0	45	0	1	20	0	sub-14	0.454857	TRUE	-11.5335	-6.65898	12.1061	0	0	1	0.105263	3.24793	1.71145	0.00108048
1949	1	2	150	50	(2034.4813055138422, 'Miss', 'Miss')	312	2037.08	1	2038.08	2042.08	left	1.00458	0	315	1	1	80	1	sub-14	0.609143	TRUE	-0.391825	-6.00148	-0.573574	0	0	0	0.398693	1.32665	1.70891	0.000240483
1950	1	2	151	51	(2045.0834795577564, 'Miss', 'Miss')	360	2048.08	0	2049.08	2052.58	right	0.503685	45	45	1	1	80	1	sub-14	0.530857	TRUE	1.91719	5.33852	-5.61352	0	0	3	0.402597	1.31259	1.70631	2.93983e-05
1951	1	2	152	52	(2055.585646638383, 'Miss', 'Miss')	408	2058.99	0	2059.99	2063.89	right	0.90389	45	315	0	1	20	0	sub-14	0.292571	FALSE	13.9239	25.8484	-15.9993	0	0	2	0.083871	3.57568	1.71798	0.000301504
1952	1	2	153	53	(2066.8879631938908, 'Miss', 'Miss')	372	2069.99	0	2070.99	2075.09	right	1.10489	45	45	1	1	80	1	sub-14	0.251429	FALSE	-7.02686	-7.45854	4.01631	0	0	3	0.403846	1.30812	1.71532	0.000299183
1953	1	2	154	54	(2078.0902317276805, 'Miss', 'Miss')	408	2081.49	0	2082.49	2086.04	left	0.554004	0	315	1	1	80	1	sub-14	0.491429	TRUE	-2.14956	-2.24408	10.5536	0	0	0	0.394904	1.34042	1.7129	2.87651e-05
1954	1	2	155	55	(2089.0424990824276, 'Miss', 'Miss')	324	2091.74	1	2092.74	2096.18	right	0.438311	45	45	1	1	80	1	sub-14	0.382286	FALSE	-1.08432	13.8843	-4.92563	0	0	3	0.405063	1.30378	1.71029	2.82054e-05
1955	1	2	156	56	(2099.17789397437, 'Miss', 'Miss')	408	2102.58	0	2103.58	2107.08	right	0.502984	45	45	1	1	80	1	sub-14	0.491429	TRUE	5.21385	9.72256	-8.66261	0	0	3	0.408805	1.29052	1.70763	0.000165228
1956	1	2	157	57	(2110.0801249729857, 'Miss', 'Miss')	300	2112.58	0	2113.58	2117.36	left	0.786445	0	315	1	1	80	1	sub-14	0.294857	FALSE	-6.75174	-18.1491	-3.16504	0	0	0	0.39375	1.34465	1.70533	2.70779e-05
1957	1	2	158	58	(2120.3655346098994, 'Miss', 'Miss')	408	2123.77	1	2124.77	2127.85	right	0.0861253	45	45	1	1	80	1	sub-14	0.666857	TRUE	-4.28252	-22.3273	14.2654	0	0	3	0.409938	1.28652	1.7027	2.65776e-05
1958	1	2	159	59	(2130.851022535253, 'Miss', 'Miss')	408	2134.25	0	2135.25	2138.74	right	0.488052	45	315	0	1	20	0	sub-14	0.573714	TRUE	1.50103	-0.430678	7.95915	0	0	2	0.0864198	3.5325	1.71365	0.000266054
1959	1	2	160	60	(2141.736592965858, 'Miss', 'Miss')	360	2144.74	1	2145.74	2156.69	left	7.95463	0	315	1	1	80	1	sub-14	0.606857	TRUE	-5.98806	3.51929	2.11414	1	1	0	0.392638	1.34873	1.71138	0.000267163
1960	1	2	161	61	(2159.690314843261, 'Miss', 'Miss')	336	2162.49	0	2163.49	2167.36	left	0.870339	0	315	1	1	80	1	sub-14	0.790857	TRUE	-12.0726	1.53059	-2.89414	0	0	0	0.396341	1.33518	1.70906	0.000163588
1961	1	2	162	62	(2170.3591311592154, 'Miss', 'Miss')	372	2173.46	0	2174.46	2177.93	right	0.469732	45	45	1	1	80	1	sub-14	0.448	TRUE	3.54717	2.89343	-6.26727	0	0	3	0.406061	1.30023	1.70656	2.54918e-05
1962	1	2	163	63	(2180.9279718605494, 'Miss', 'Miss')	360	2183.93	1	2184.93	2188.95	right	1.02128	45	315	0	1	20	0	sub-14	0.4	FALSE	6.10147	10.4492	1.07872	0	0	2	0.0903614	3.46815	1.71685	0.000241627
1963	1	2	164	64	(2191.946884816398, 'Miss', 'Miss')	384	2195.15	1	2196.15	2200.2	right	1.05374	45	45	1	1	80	1	sub-14	0.917143	TRUE	-2.58145	-6.29105	5.8543	0	0	3	0.407186	1.29624	1.71431	0.000239877
1964	1	2	165	65	(2203.199194422489, 'Miss', 'Miss')	348	2206.1	1	2207.1	2210.75	right	0.65375	45	45	1	1	80	1	sub-14	0.616571	TRUE	-6.30677	-19.3136	3.18771	0	0	3	0.410714	1.28379	1.71173	0.000146822
1965	1	2	166	66	(2213.751331000586, 'Miss', 'Miss')	372	2216.85	0	2217.85	2221.24	right	0.387098	45	315	0	1	20	0	sub-14	0.169714	FALSE	-2.16787	0.582684	6.98905	0	0	2	0.0946746	3.40088	1.72143	0.000220413
1966	1	2	167	67	(2224.2368217001576, 'Miss', 'Miss')	312	2226.84	1	2227.84	2231.47	left	0.63705	0	45	0	1	20	0	sub-14	0.463429	TRUE	2.25421	9.79039	-5.17678	0	0	1	0.1	3.32193	1.73057	0.000402285
1967	1	2	168	68	(2234.472258233117, 'Miss', 'Miss')	408	2237.87	1	2238.87	2243.62	right	1.75474	45	315	0	1	20	0	sub-14	0.275429	FALSE	0.15969	9.23567	-5.74832	0	0	2	0.0994152	3.33039	1.73965	0.000385703
1968	1	2	169	69	(2246.6247248322225, 'Miss', 'Miss')	312	2249.22	1	2250.23	2254.96	right	1.73785	45	315	0	1	20	0	sub-14	0.265714	FALSE	1.37484	9.07716	-9.64706	0	0	2	0.104651	3.25634	1.74822	0.000847575
1969	1	2	170	70	(2257.9603733432023, 'Miss', 'Miss')	336	2260.76	1	2261.76	2265.63	left	0.870465	0	315	1	1	80	1	sub-14	0.549714	TRUE	-3.23104	-2.68758	10.9699	0	0	0	0.381503	1.39023	1.74612	0.000192624
1970	1	2	171	71	(2268.6291949301713, 'Miss', 'Miss')	300	2271.13	0	2272.13	2276.11	left	0.988012	0	45	0	1	20	0	sub-14	0.245714	FALSE	7.21655	9.36191	-5.85735	0	0	1	0.103448	3.27302	1.75465	0.000192073
1971	1	2	172	72	(2279.1147019976315, 'Miss', 'Miss')	348	2282.01	0	2283.02	2287.75	left	1.73679	0	315	1	1	80	1	sub-14	0.386286	FALSE	3.07174	7.09556	-0.446571	0	0	0	0.382857	1.38512	1.75251	0.000190604
1972	1	2	173	73	(2290.7503963664394, 'Miss', 'Miss')	300	2293.25	1	2294.25	2298.08	left	0.836616	0	45	0	1	20	0	sub-14	0.359429	FALSE	3.82251	12.035	-7.39645	0	0	1	0.107955	3.2115	1.76056	0.000178555
1973	1	2	174	74	(2301.085866772605, 'Miss', 'Miss')	324	2303.79	0	2304.79	2309.47	left	1.68835	0	315	1	1	80	1	sub-14	0.846286	TRUE	0.365736	3.45734	1.20967	0	0	0	0.384181	1.38014	1.75839	0.000177194
1974	1	2	175	75	(2312.471495045662, 'Miss', 'Miss')	300	2314.97	0	2315.97	2319.47	right	0.503124	45	45	1	1	80	1	sub-14	0.588	TRUE	2.77192	7.34234	1.53429	0	0	3	0.393258	1.34645	1.75605	2.55424e-05
1975	1	2	176	76	(2322.4735665544677, 'Miss', 'Miss')	360	2325.47	0	2326.47	2330.49	left	1.02144	0	315	1	1	80	1	sub-14	0.546857	TRUE	14.7499	19.2032	-10.9632	0	0	0	0.385475	1.37529	1.7539	2.50596e-05
1976	1	2	177	77	(2333.4924847813318, 'Miss', 'Miss')	300	2335.99	1	2336.99	2341.08	left	1.08708	0	315	1	1	80	1	sub-14	0.413143	TRUE	-9.84065	-1.70569	3.9449	0	0	0	0.388889	1.36257	1.75171	0.000140106
1977	1	2	178	78	(2344.077963579507, 'Miss', 'Miss')	312	2346.68	0	2347.68	2351.46	left	0.786873	0	315	1	1	80	1	sub-14	0	FALSE	-8.06693	-15.701	1.15274	0	0	0	0.392265	1.3501	1.74947	0.000136604
1978	1	2	179	79	(2354.463441767354, 'Miss', 'Miss')	312	2357.06	1	2358.06	2362.2	right	1.1368	45	45	1	1	80	1	sub-14	0.573143	TRUE	-12.676	-6.70637	12.2983	0	0	3	0.39011	1.35805	1.74729	2.37264e-05
1979	1	2	180	80	(2365.198948071905, 'Miss', 'Miss')	324	2367.9	1	2368.9	2372.87	left	0.970521	0	315	1	1	80	1	sub-14	0.630286	TRUE	-2.81024	0.250346	-7.48056	0	0	0	0.393443	1.34577	1.74508	2.33102e-05
1980	1	2	181	81	(2375.867769658874, 'Miss', 'Miss')	312	2378.47	0	2379.47	2383.22	right	0.753205	45	45	1	1	80	1	sub-14	1	TRUE	2.85192	6.85119	-1.92395	0	0	3	0.391304	1.35364	1.74293	2.28934e-05
1981	1	2	182	82	(2386.2198881490667, 'Miss', 'Miss')	336	2389.02	1	2390.02	2394.07	right	1.05442	45	45	1	1	80	1	sub-14	0.771429	TRUE	-3.50448	-5.86957	-2.95512	0	0	3	0.394595	1.34156	1.74074	0.000129483
1982	1	2	183	83	(2397.0721421598237, 'Miss', 'Miss')	396	2400.37	1	2401.37	2405.59	right	1.22038	45	45	1	1	80	1	sub-14	0.418286	TRUE	-14.2437	-6.65353	13.8316	0	0	3	0.397849	1.32971	1.73851	0.000126358
1983	1	2	184	84	(2408.5911570681947, 'Miss', 'Miss')	396	2411.89	0	2412.89	2417.23	left	1.33667	0	315	1	1	80	1	sub-14	0.629143	TRUE	-3.20987	-11.7905	12.3697	0	0	0	0.390374	1.35707	1.73645	2.17204e-05
1984	1	2	185	85	(2420.2268664177827, 'Miss', 'Miss')	408	2423.63	1	2424.63	2428.29	left	0.670259	0	315	1	1	80	1	sub-14	0.817714	TRUE	1.43038	6.07198	5.1801	0	0	0	0.393617	1.34514	1.73435	0.000125897
1985	1	2	186	86	(2431.2958001941397, 'Miss', 'Miss')	348	2434.2	1	2435.2	2438.91	left	0.719789	0	45	0	1	20	0	sub-14	0.849714	TRUE	2.97097	5.65836	-3.69669	0	0	1	0.10582	3.24031	1.74211	0.000157324
1986	1	2	187	87	(2441.914609005834, 'Miss', 'Miss')	408	2445.31	0	2446.32	2449.92	right	0.603278	45	45	1	1	80	1	sub-14	0.698286	TRUE	0.968884	-13.3593	-3.22792	0	0	3	0.394737	1.34104	1.73998	0.000156248
1987	1	2	188	88	(2452.916799251183, 'Miss', 'Miss')	372	2456.02	0	2457.02	2461.25	left	1.23843	0	315	1	1	80	1	sub-14	0.396	FALSE	-4.11655	-12.4519	-2.96398	0	0	0	0.39267	1.34861	1.73791	2.09258e-05
1988	1	2	189	89	(2464.2525395887887, 'Miss', 'Miss')	384	2467.45	1	2468.45	2471.97	left	0.521133	0	315	1	1	80	1	sub-14	0.417714	TRUE	0.122936	13.7325	-4.14078	0	0	0	0.395833	1.33703	1.7358	0.000119586
1989	1	2	190	90	(2474.971380054314, 'Miss', 'Miss')	324	2477.67	1	2478.67	2483.47	left	1.80363	0	315	1	1	80	1	sub-14	0.547429	TRUE	-9.28261	-9.84067	18.7364	0	0	0	0.398964	1.32567	1.73366	0.000116808
1990	1	2	191	91	(2486.47376546592, 'Miss', 'Miss')	408	2489.87	1	2490.87	2494.34	left	0.470529	0	315	1	1	80	1	sub-14	0.982286	TRUE	0.636836	1.37665	5.45041	0	0	0	0.402062	1.31451	1.73148	0.00011412
1991	1	2	192	92	(2497.3425970955595, 'Miss', 'Miss')	384	2500.54	1	2501.54	2505.68	right	1.13807	45	45	1	1	80	1	sub-14	0.682286	TRUE	-3.47253	-3.44306	-0.488299	0	0	3	0.389744	1.3594	1.72955	1.95742e-05
1992	1	2	193	93	(2508.678196502876, 'Miss', 'Miss')	324	2511.38	0	2512.38	2516.13	left	0.753927	0	315	1	1	80	1	sub-14	0.656571	TRUE	-5.39602	2.90581	-3.98208	0	0	0	0.403061	1.31093	1.7274	1.92701e-05
1993	1	2	194	94	(2519.1303938086103, 'Miss', 'Miss')	324	2521.83	1	2522.83	2526.63	right	0.804122	45	45	1	1	80	1	sub-14	0.396571	FALSE	-3.62049	-4.41371	-1.77289	0	0	3	0.390863	1.35527	1.72549	1.89343e-05
1994	1	2	195	95	(2529.632586134623, 'Miss', 'Miss')	360	2532.63	1	2533.63	2537.72	right	1.08821	45	315	0	1	20	0	sub-14	0.922286	TRUE	2.21746	4.5866	5.35014	0	0	2	0.0959596	3.38143	1.73365	0.000161041
1995	1	2	196	96	(2540.718190743599, 'Miss', 'Miss')	408	2544.12	0	2545.12	2548.84	right	0.719958	45	315	0	1	20	0	sub-14	0.379429	FALSE	-3.00797	10.0971	-7.73804	0	0	2	0.100503	3.3147	1.74139	0.000661371
1996	1	2	197	97	(2551.837092907739, 'Miss', 'Miss')	360	2554.84	0	2555.84	2559.25	right	0.420434	45	45	1	1	80	1	sub-14	0.266286	FALSE	-6.06253	-1.68581	4.80767	0	0	3	0.39	1.35845	1.73946	0.00015044
1997	1	2	198	98	(2562.2558800250454, 'Miss', 'Miss')	384	2565.46	0	2566.46	2570.57	left	1.12001	0	315	1	1	80	1	sub-14	0.856	TRUE	3.36487	5.14155	4.37731	0	0	0	0.39801	1.32912	1.7374	1.88573e-05
1998	1	2	199	99	(2573.574804160995, 'Miss', 'Miss')	300	2576.08	0	2577.08	2580.63	right	0.554528	45	45	1	1	80	1	sub-14	1	TRUE	-0.325311	-0.81776	-3.31422	0	0	3	0.391089	1.35443	1.73549	1.85439e-05
[truncated: 2,801 more rows]
