# Supplementary material for: Pupil dilation offers a time-window on prediction error
Source: eLife. 2026 Jan 8;14:RP105287. doi: 10.7554/eLife.105287 (PMC12782557; doi:10.7554/eLife.105287)
Supplement: Table 4—source data 1. [file elife-105287-table4-data1.xlsx]

## Sheet: task-letter_color_visual_decisi
	subject	trial_num	letter	frequency	r	g	b	PBASE	ITI	match	button	correct	RT	block	blinks_ratio	blinks_exclude	pupil_feed_locked_t1	pupil_feed_locked_t2	pupil_baseline_feed_locked	missing	drop_trial	letter_color_pair	model_p	model_i	model_H	model_D
0	102	0	D	80	76	154	68	3.77	5.5	0	ralt	FALSE	0.916456	1	0.272	FALSE	18.1153	-2.66032	16.759	FALSE	FALSE	6	0.00471698	7.72792	4.5575	0.0485006
1	102	1	I	80	138	154	91	5.34	4.9	0	ralt	FALSE	1.47125	1	0	FALSE	23.4132	3.82218	-10.9379	FALSE	FALSE	16	0.00764916	7.03048	4.58743	0.081334
2	102	2	T	40	157	193	131	4.07	5.23	1	lalt	FALSE	1.02513	1	0	FALSE	9.87331	-2.75204	-6.3449	FALSE	FALSE	31	0.0774578	3.69045	4.55924	0.0384526
3	102	3	R	20	138	154	91	4.71	4.43	0	ralt	FALSE	0.895033	1	0	FALSE	17.6613	2.6224	-3.80468	FALSE	FALSE	28	0.0145138	6.10643	4.57696	0.0250774
4	102	4	A	20	157	193	131	3.56	3.63	0	lalt	TRUE	1.31593	1	0	FALSE	14.9466	19.933	-11.5529	FALSE	FALSE	1	0.0212264	5.558	4.58588	0.0345673
5	102	5	A	20	75	124	89	5.3	4.76	1	ralt	TRUE	1.43497	1	0	FALSE	5.19948	-9.57956	7.62582	FALSE	FALSE	5	0.0483203	4.37123	4.57369	0.0208894
6	102	6	R	20	76	154	68	4.34	4.98	1	lalt	FALSE	1.4138	1	0	FALSE	13.2904	-11.386	10.9366	FALSE	FALSE	24	0.0471698	4.40599	4.56286	0.0130306
7	102	7	T	40	157	193	131	5.22	5.22	1	lalt	FALSE	1.33471	1	0	FALSE	11.9456	3.48619	-7.69498	FALSE	FALSE	31	0.0917069	3.44683	4.53403	0.00946183
8	102	8	D	80	0	168	107	5.31	4.28	1	lalt	FALSE	1.47234	1	0.114	FALSE	1.05073	3.61785	-4.24899	FALSE	FALSE	8	0.106775	3.22735	4.50216	0.00548351
9	102	9	I	80	3	121	112	4.17	5.06	1	ralt	TRUE	1.30517	1	0	FALSE	16.5637	5.74875	-2.97653	FALSE	FALSE	15	0.10566	3.24249	4.47204	0.00480741
10	102	10	T	40	76	154	68	5	4.49	0	lalt	TRUE	1.03016	1	0	FALSE	9.48248	25.0307	-13.4169	FALSE	FALSE	30	0.00861362	6.85916	4.49987	0.0249642
11	102	11	I	80	3	121	112	4.56	4.85	1	ralt	TRUE	1.18509	1	0	FALSE	5.54069	-1.39455	-9.93307	FALSE	FALSE	15	0.122441	3.02984	4.46709	0.0239846
12	102	12	I	80	3	121	112	4.76	3.79	1	lalt	FALSE	1.83489	1	0	FALSE	16.1228	-16.6448	5.62038	FALSE	FALSE	15	0.140723	2.82907	4.43189	0.0079827
13	102	13	I	80	75	124	89	4.57	5.4	0	lalt	TRUE	0.824863	1	0	FALSE	-3.74482	-1.37636	2.46103	FALSE	FALSE	17	0.00693107	7.17271	4.46281	0.0250421
14	102	14	D	80	138	154	91	4.89	5.09	0	lalt	TRUE	0.732748	1	0	FALSE	10.5067	-6.09257	5.50517	FALSE	FALSE	10	0.00566038	7.46489	4.49538	0.0491459
15	102	15	A	20	76	154	68	5.39	4.73	0	ralt	FALSE	1.0346	1	0	FALSE	9.80587	8.77317	-2.72018	FALSE	FALSE	0	0.0155383	6.00803	4.5119	0.0378087
16	102	16	A	20	0	168	107	5.26	4.69	0	lalt	TRUE	1.13142	1	0	FALSE	2.9219	0.764043	-5.94754	FALSE	FALSE	2	0.0108853	6.52147	4.53391	0.0277098
17	102	17	A	20	138	154	91	3.64	3.67	0	lalt	TRUE	1.79815	1	0	FALSE	-2.0739	6.31425	2.18418	FALSE	FALSE	4	0.0160199	5.96399	4.54891	0.0265782
18	102	18	A	20	75	124	89	4.56	5.05	1	ralt	TRUE	1.31623	1	0	FALSE	-6.49788	-6.82673	-2.96186	FALSE	FALSE	5	0.0552062	4.17903	4.53845	0.0145176
19	102	19	D	80	0	168	107	3.6	5.07	1	lalt	FALSE	1.09304	1	0.0488571	FALSE	6.84263	-9.36133	8.61456	FALSE	FALSE	8	0.103602	3.27088	4.51391	0.00510172
20	102	20	I	80	3	121	112	5.36	4.82	1	ralt	TRUE	0.99707	1	0	FALSE	6.92042	5.05925	-6.66128	FALSE	FALSE	15	0.138477	2.85228	4.48342	0.00275792
21	102	21	R	20	157	193	131	3.59	5.04	0	ralt	FALSE	1.0439	1	0	FALSE	3.39156	4.77116	5.13001	FALSE	FALSE	25	0.0178749	5.80592	4.49697	0.0101279
22	102	22	D	80	75	124	89	4.43	4.06	0	ralt	FALSE	1.04686	1	0.143429	FALSE	0.00922266	-5.28932	-13.3708	FALSE	FALSE	11	0.00487964	7.67901	4.52815	0.0314247
23	102	23	O	40	76	154	68	4.92	4.57	0	ralt	FALSE	1.07683	1	0	FALSE	21.7862	11.4896	-14.4409	FALSE	FALSE	18	0.00863447	6.85568	4.55176	0.0371414
24	102	24	O	40	76	154	68	5.19	3.61	0	lalt	TRUE	1.29268	1	0	FALSE	15.2546	1.3749	-12.8588	FALSE	FALSE	18	0.0251572	5.31288	4.55792	0.04654
25	102	25	O	40	0	168	107	4.72	4.91	0	lalt	TRUE	2.15247	1	0.0437143	FALSE	2.35447	-21.2449	12.0024	FALSE	FALSE	20	0.0111352	6.48873	4.57715	0.0177439
26	102	26	T	40	3	121	112	5.22	5.24	0	lalt	TRUE	1.08741	1	0	FALSE	6.54435	4.7435	-5.66671	FALSE	FALSE	33	0.00456482	7.77523	4.60659	0.0326715
27	102	27	O	40	138	154	91	5.35	5	1	lalt	FALSE	0.779223	1	0	FALSE	24.76	-15.9746	44.1875	FALSE	FALSE	22	0.047619	4.39232	4.60002	0.0238504
28	102	28	O	40	76	154	68	3.73	4.37	0	lalt	TRUE	0.92403	1	0	FALSE	0.594265	3.73635	-3.10488	FALSE	FALSE	18	0.0392099	4.67264	4.59738	0.00657799
29	102	29	I	80	3	121	112	4.78	4.76	1	ralt	TRUE	1.90598	1	0.337429	FALSE	14.8885	-0.226923	-25.0278	FALSE	FALSE	15	0.134688	2.89231	4.57051	0.00439759
30	102	30	D	80	3	121	112	5.41	4.11	0	ralt	FALSE	0.858847	1	0.249429	FALSE	7.30779	0.0351173	-16.2191	FALSE	FALSE	9	0.0051458	7.60239	4.59787	0.0185821
31	102	31	A	20	75	124	89	3.75	5.35	1	lalt	FALSE	0.766782	1	0	FALSE	-10.0001	-24.0653	29.3482	FALSE	FALSE	5	0.0594199	4.07291	4.58785	0.0196164
32	102	32	D	80	75	124	89	4.87	4.78	0	ralt	FALSE	1.45365	1	0.123143	FALSE	-3.94687	2.98698	-3.72289	FALSE	FALSE	11	0.0188679	5.72792	4.59792	0.00841223
33	102	33	T	40	157	193	131	4.22	5.13	1	ralt	TRUE	0.885553	1	0	FALSE	9.05292	14.296	-8.59951	FALSE	FALSE	31	0.0716434	3.80302	4.58476	0.00786223
34	102	34	T	40	157	193	131	5.36	5.13	1	ralt	TRUE	1.10145	1	0	FALSE	4.64156	-7.65002	21.3896	FALSE	FALSE	31	0.0849057	3.558	4.56882	0.00671014
35	102	35	I	80	76	154	68	3.74	3.52	0	ralt	FALSE	1.49519	1	0.329143	FALSE	8.11323	3.54322	-21.738	FALSE	FALSE	12	0.00398618	7.97078	4.59739	0.019851
36	102	36	O	40	3	121	112	4.57	5.11	0	ralt	FALSE	1.3852	1	0.384571	FALSE	-9.42829	-12.7278	-4.79736	FALSE	FALSE	21	0.0086478	6.85345	4.61748	0.0289636
37	102	37	I	80	76	154	68	4.07	3.56	0	lalt	TRUE	1.02411	1	0	FALSE	2.0768	12.7679	13.9593	FALSE	FALSE	12	0.0175756	5.83028	4.62785	0.0164228
38	102	38	T	40	76	154	68	4.59	3.77	0	missing	FALSE		1	0	FALSE	-7.25812	-32.3554	31.2314	TRUE	TRUE	30	0.0188679	5.72792	4.63698	0.0112101
39	102	39	O	40	138	154	91	4.47	3.55	1	ralt	TRUE	1.55299	1	0	FALSE	-4.99175	-3.92653	2.12702	FALSE	FALSE	22	0.0533333	4.22882	4.62954	0.00727395
40	102	40	D	80	0	168	107	5.22	4.25	1	ralt	TRUE	1.9409	1	0	FALSE	0.260911	-16.2419	-4.10242	FALSE	FALSE	8	0.0881331	3.50417	4.61372	0.00300666
41	102	41	A	20	0	168	107	3.76	4.28	0	lalt	TRUE	0.885779	1	0	FALSE	2.28918	5.41904	-4.01926	FALSE	FALSE	2	0.0203382	5.61967	4.62179	0.00577533
42	102	42	T	40	157	193	131	5.5	4.41	1	ralt	TRUE	0.540868	1	0	FALSE	3.78557	-14.5219	2.87216	FALSE	FALSE	31	0.0890179	3.48976	4.60632	0.00566444
43	102	43	R	20	76	154	68	5.28	3.91	1	ralt	TRUE	1.31269	1	0.482	TRUE	13.9217	16.239	-22.7152	FALSE	FALSE	24	0.0377359	4.72792	4.60522	0.00351572
44	102	44	I	80	138	154	91	4.92	5.49	0	lalt	TRUE	1.11058	1	0	FALSE	-9.40487	-13.8426	9.4776	FALSE	FALSE	16	0.0160377	5.96239	4.61647	0.00787522
45	102	45	O	40	138	154	91	5.41	5.03	1	lalt	FALSE	1.5482	1	0.126286	FALSE	-4.52088	-26.6119	11.2755	FALSE	FALSE	22	0.0617284	4.01792	4.60762	0.0067701
46	102	46	D	80	76	154	68	3.74	3.86	0	ralt	FALSE	1.11115	1	0	FALSE	9.75529	-1.75474	-12.9522	FALSE	FALSE	6	0.014266	6.13128	4.62017	0.00712558
47	102	47	R	20	76	154	68	5.34	4.11	1	ralt	TRUE	1.35315	1	0.135143	FALSE	-8.05204	2.41781	-13.1166	FALSE	FALSE	24	0.0479654	4.38186	4.61544	0.0074288
48	102	48	D	80	0	168	107	4.47	4.85	1	ralt	TRUE	1.45898	1	0	FALSE	14.9557	22.3506	-8.60543	FALSE	FALSE	8	0.0916442	3.44781	4.60074	0.00262451
49	102	49	D	80	3	121	112	4.22	3.96	0	lalt	TRUE	1.20189	1	0.228571	FALSE	6.00348	-7.62157	-14.6749	FALSE	FALSE	9	0.0157603	5.98756	4.61186	0.00575841
50	102	50	T	40	75	124	89	5.4	4.64	0	lalt	TRUE	1.55386	1	0	FALSE	-7.53263	-3.22709	9.00957	FALSE	FALSE	35	0.0105309	6.56922	4.62753	0.0115895
51	102	51	A	20	157	193	131	5.04	5.37	0	lalt	TRUE	1.24769	1	0.266	FALSE	-9.20324	-18.5198	-1.07832	FALSE	FALSE	1	0.0212535	5.55615	4.63437	0.0102671
52	102	52	A	20	3	121	112	4.66	4.44	0	lalt	TRUE	1.89551	1	0.292857	FALSE	-2.58287	0.256933	-15.444	FALSE	FALSE	3	0.0109348	6.51493	4.64914	0.00984128
53	102	53	O	40	138	154	91	5.48	3.85	1	ralt	TRUE	2.34522	1	0.281714	FALSE	-5.30803	-4.36653	4.74827	FALSE	FALSE	22	0.0674157	3.89077	4.63954	0.00728944
54	102	54	O	40	138	154	91	4	4.6	1	ralt	TRUE	0.65613	1	0	FALSE	2.92856	1.26258	-6.20548	FALSE	FALSE	22	0.0777778	3.6845	4.62805	0.0044256
55	102	55	T	40	0	168	107	4.36	5.14	0	ralt	FALSE	0.836079	1	0.105429	FALSE	5.50281	16.5094	-5.90724	FALSE	FALSE	32	0.00808625	6.95031	4.64569	0.00840439
56	102	56	T	40	76	154	68	4.59	4.94	0	ralt	FALSE	0.813986	1	0.304857	FALSE	5.79211	-5.18467	-14.4808	FALSE	FALSE	30	0.0260459	5.2628	4.64955	0.0101211
57	102	57	R	20	76	154	68	4.65	5.47	1	ralt	TRUE	1.9828	1	0	FALSE	7.49233	-0.609147	26.9756	FALSE	FALSE	24	0.0535606	4.22269	4.64365	0.00394718
58	102	58	A	20	75	124	89	4.8	3.54	1	ralt	TRUE	1.51361	1	0	FALSE	-11.4822	-11.991	-27.1834	FALSE	FALSE	5	0.0529908	4.23812	4.63803	0.00253877
59	102	59	D	80	0	168	107	3.65	4.39	1	ralt	TRUE	1.31358	1	0.114	FALSE	0.56481	11.8579	-20.4392	FALSE	FALSE	8	0.0915591	3.44915	4.62489	0.00193165
60	102	60	O	40	138	154	91	3.63	5.43	1	lalt	FALSE	1.77773	2	0	FALSE	-3.89081	-18.0721	34.6219	FALSE	FALSE	22	0.0833333	3.58496	4.61335	0.00140611
61	102	61	D	80	0	168	107	4.32	3.66	1	ralt	TRUE	0.622706	2	0	FALSE	0.486995	-3.66494	6.70906	FALSE	FALSE	8	0.0999805	3.32221	4.59952	0.00131355
62	102	62	T	40	138	154	91	4.15	3.56	0	lalt	TRUE	1.30171	2	0	FALSE	18.7112	-1.85471	-16.3488	FALSE	FALSE	34	0.00750866	7.05723	4.61728	0.00756533
63	102	63	I	80	3	121	112	3.67	4.22	1	ralt	TRUE	1.71864	2	0	FALSE	-3.20547	-9.1628	-8.56853	FALSE	FALSE	15	0.0985325	3.34326	4.6039	0.00748863
64	102	64	O	40	3	121	112	4.08	4.56	0	lalt	TRUE	0.745742	2	0	FALSE	0.928639	-8.31662	-2.28852	FALSE	FALSE	21	0.0162264	5.94551	4.61355	0.00412415
65	102	65	R	20	76	154	68	3.52	3.82	1	ralt	TRUE	0.965718	2	0	FALSE	-2.61265	4.90384	6.32002	FALSE	FALSE	24	0.0592191	4.07779	4.60725	0.00450663
66	102	66	D	80	138	154	91	4.25	5.03	0	ralt	FALSE	0.763813	2	0	FALSE	7.01452	1.98515	1.09572	FALSE	FALSE	10	0.0125786	6.31288	4.61945	0.0052565
67	102	67	O	40	0	168	107	4.52	4.92	0	lalt	TRUE	0.629758	2	0.112	FALSE	9.84311	13.4545	-10.8794	FALSE	FALSE	20	0.0163034	5.93869	4.62871	0.00760053
68	102	68	A	20	75	124	89	3.94	4.02	1	ralt	TRUE	1.47655	2	0	FALSE	5.59426	-8.66741	8.68021	FALSE	FALSE	5	0.0575109	4.12002	4.62284	0.00428298
69	102	69	D	80	75	124	89	5.39	4.45	0	lalt	TRUE	1.56959	2	0	FALSE	10.104	4.09103	-10.4389	FALSE	FALSE	11	0.021743	5.5233	4.62878	0.00344053
70	102	70	I	80	3	121	112	5.34	4.42	1	ralt	TRUE	1.4434	2	0	FALSE	7.93373	-2.95102	5.34774	FALSE	FALSE	15	0.10146	3.30102	4.61583	0.00294999
71	102	71	D	80	0	168	107	3.56	4.27	1	ralt	TRUE	1.4532	2	0	FALSE	4.4337	14.5206	-3.2696	FALSE	FALSE	8	0.0999824	3.32218	4.60331	0.000957907
72	102	72	I	80	75	124	89	3.9	4.31	0	lalt	TRUE	1.06427	2	0	FALSE	-9.55138	-10.9049	-1.49125	FALSE	FALSE	17	0.0124039	6.33306	4.61521	0.00438562
73	102	73	A	20	0	168	107	5.12	3.93	0	lalt	TRUE	0.692255	2	0	FALSE	5.0963	-5.52219	-10.3877	FALSE	FALSE	2	0.0235416	5.40864	4.6202	0.00602951
74	102	74	I	80	3	121	112	4.22	4.42	1	ralt	TRUE	0.401236	2	0.240286	FALSE	18.1586	11.4373	-8.46952	FALSE	FALSE	15	0.106861	3.22619	4.60716	0.00255651
75	102	75	D	80	75	124	89	4.76	4.67	0	lalt	TRUE	0.477238	2	0	FALSE	13.965	17.0222	-12.0761	FALSE	FALSE	11	0.0295767	5.07939	4.60965	0.00208854
76	102	76	A	20	157	193	131	4.68	3.99	0	ralt	FALSE	0.740194	2	0	FALSE	2.24107	12.2316	9.4646	FALSE	FALSE	1	0.025438	5.29687	4.61377	0.00356042
77	102	77	T	40	138	154	91	3.92	5.17	0	ralt	FALSE	1.23413	2	0	FALSE	4.37201	-16.839	-2.68309	FALSE	FALSE	34	0.0153615	6.02454	4.62311	0.00487049
78	102	78	I	80	3	121	112	5.09	3.84	1	ralt	TRUE	0.3111	2	0	FALSE	9.24934	12.9155	-13.7814	FALSE	FALSE	15	0.111883	3.15993	4.60996	0.00332799
79	102	79	A	20	138	154	91	5.03	4.31	0	lalt	TRUE	1.11996	2	0	FALSE	4.29413	-3.64296	-4.95242	FALSE	FALSE	4	0.0160788	5.9587	4.61876	0.00313979
80	102	80	R	20	0	168	107	5.2	4.7	0	ralt	FALSE	2.25584	2	0.136286	FALSE	-8.4465	-8.19486	-6.28647	FALSE	FALSE	26	0.00683149	7.19358	4.63511	0.00835288
81	102	81	I	80	3	121	112	4.03	4.57	1	ralt	TRUE	0.456738	2	0	FALSE	0.288136	13.2168	16.75	FALSE	FALSE	15	0.117562	3.08851	4.62162	0.00588535
82	102	82	A	20	75	124	89	5.13	4.66	1	lalt	FALSE	1.58855	2	0	FALSE	12.0599	14.804	-9.03482	FALSE	FALSE	5	0.0591621	4.07918	4.61628	0.00105391
83	102	83	A	20	75	124	89	3.64	3.59	1	ralt	TRUE	0.93451	2	0.108857	FALSE	-7.88563	-6.41573	-14.649	FALSE	FALSE	5	0.0670683	3.89822	4.60963	0.00295303
84	102	84	O	40	3	121	112	3.94	4.54	0	lalt	TRUE	0.631631	2	0.114857	FALSE	5.43726	31.2907	-22.1965	FALSE	FALSE	21	0.0218553	5.51587	4.61514	0.0025475
85	102	85	I	80	157	193	131	3.93	3.71	0	lalt	TRUE	0.333685	2	0	FALSE	7.98085	3.09688	10.6345	FALSE	FALSE	13	0.0018712	9.06182	4.63896	0.0144934
86	102	86	R	20	76	154	68	5.28	4.6	1	ralt	TRUE	1.48068	2	0	FALSE	-3.53982	5.66449	-6.47962	FALSE	FALSE	24	0.0572224	4.12728	4.63404	0.0131836
87	102	87	A	20	157	193	131	3.84	4.91	0	lalt	TRUE	0.393574	2	0	FALSE	3.7242	-11.6345	-6.87225	FALSE	FALSE	1	0.0312931	4.99801	4.63563	0.00200165
88	102	88	D	80	0	168	107	3.88	3.54	1	ralt	TRUE	0.617573	2	0	FALSE	-2.7436	13.1808	-23.1784	FALSE	FALSE	8	0.0943396	3.40599	4.62536	0.00167722
89	102	89	I	80	0	168	107	4.35	5.04	0	lalt	TRUE	0.806672	2	0.14	FALSE	-7.56772	-1.48003	16.1859	FALSE	FALSE	14	0.000905659	10.1087	4.65124	0.0179773
90	102	90	T	40	157	193	131	5.18	4.3	1	lalt	FALSE	2.19748	2	0	FALSE	-0.663749	-1.78003	-3.82866	FALSE	FALSE	31	0.0630428	3.98752	4.64537	0.0180517
91	102	91	D	80	0	168	107	4.38	3.69	1	ralt	TRUE	0.543402	2	0	FALSE	-0.564758	-11.0085	9.91624	FALSE	FALSE	8	0.0999851	3.32214	4.63465	0.000936062
92	102	92	I	80	3	121	112	5.34	4.19	1	ralt	TRUE	0.810421	2	0	FALSE	-6.03859	-12.4584	2.55447	FALSE	FALSE	15	0.115271	3.1169	4.62255	0.000624742
93	102	93	O	40	138	154	91	5.01	3.74	1	lalt	FALSE	0.947263	2	0	FALSE	13.167	-10.7115	-5.2414	FALSE	FALSE	22	0.0697674	3.8413	4.61599	0.000790239
94	102	94	D	80	138	154	91	3.56	3.58	0	lalt	TRUE	0.769288	2	0.225143	FALSE	7.86456	7.58455	-28.7308	FALSE	FALSE	10	0.0175617	5.83142	4.62319	0.00254163
95	102	95	I	80	75	124	89	4.86	4.83	0	lalt	TRUE	0.643417	2	0	FALSE	5.11282	24.1296	-15.1191	FALSE	FALSE	17	0.0178597	5.80715	4.63014	0.00399762
96	102	96	R	20	75	124	89	3.94	4.28	0	ralt	FALSE	1.29218	2	0	FALSE	-4.96295	-31.3377	27.7039	FALSE	FALSE	29	0.00343053	8.18735	4.6494	0.00940371
97	102	97	R	20	138	154	91	5.27	5.09	0	lalt	TRUE	0.56627	2	0.08	FALSE	15.9473	34.3812	-18.5773	FALSE	FALSE	28	0.0117747	6.40816	4.65969	0.0101819
98	102	98	T	40	157	193	131	4.33	4.28	1	ralt	TRUE	2.14299	2	0	FALSE	-9.59635	-28.8001	3.29572	FALSE	FALSE	31	0.0667418	3.90527	4.65357	0.00327135
99	102	99	R	20	76	154	68	4.72	4.17	1	ralt	TRUE	1.02697	2	0	FALSE	-0.00109081	21.0196	-40.063	FALSE	FALSE	24	0.0591195	4.08022	4.64875	0.00105301
100	102	100	A	20	75	124	89	3.74	4.49	1	lalt	FALSE	1.31292	2	0	FALSE	8.78318	0.68215	20.1175	FALSE	FALSE	5	0.0660377	3.92057	4.64291	0.00104417
101	102	101	T	40	3	121	112	3.92	5.49	0	lalt	TRUE	0.740896	2	0	FALSE	-4.09918	-3.15755	11.6519	FALSE	FALSE	33	0.0093651	6.73849	4.65483	0.00370861
102	102	102	A	20	75	124	89	3.61	3.87	1	ralt	TRUE	1.58675	2	0	FALSE	14.979	20.4101	-18.3864	FALSE	FALSE	5	0.072327	3.78932	4.64814	0.00362892
103	102	103	T	40	76	154	68	4.04	3.73	0	lalt	TRUE	1.69475	2	0.155429	FALSE	-6.27072	-18.272	-8.01772	FALSE	FALSE	30	0.0244333	5.35501	4.65184	0.00173806
104	102	104	O	40	0	168	107	5.33	5	0	lalt	TRUE	1.37076	2	0	FALSE	3.07409	10.2107	5.07144	FALSE	FALSE	20	0.0191375	5.70746	4.65766	0.00293881
105	102	105	D	80	0	168	107	4.23	3.97	1	ralt	TRUE	0.760583	2	0	FALSE	3.07924	-7.60895	-5.60975	FALSE	FALSE	8	0.0971497	3.36365	4.64822	0.00191392
106	102	106	A	20	75	124	89	3.95	4.06	1	ralt	TRUE	0.673625	2	0	FALSE	1.84153	13.2427	-8.63665	FALSE	FALSE	5	0.0773319	3.69279	4.64112	0.000663202
107	102	107	A	20	75	124	89	5.24	4.68	1	ralt	TRUE	2.12854	2	0.138	FALSE	2.67507	5.54992	-6.06871	FALSE	FALSE	5	0.0837841	3.57718	4.63336	0.00158259
108	102	108	R	20	76	154	68	5.32	4.65	1	ralt	TRUE	1.42934	2	0.244571	FALSE	5.20429	14.3224	-14.649	FALSE	FALSE	24	0.062369	4.00303	4.62852	0.000800049
109	102	109	I	80	3	121	112	4.63	4.93	1	ralt	TRUE	0.559208	2	0	FALSE	9.02578	-18.8985	13.5555	FALSE	FALSE	15	0.108653	3.2022	4.61847	0.000701332
110	102	110	T	40	75	124	89	4.88	3.72	0	ralt	FALSE	0.680138	2	0.0208571	FALSE	17.2211	-18.6898	-0.178236	FALSE	FALSE	35	0.0130525	6.25953	4.62746	0.00238542
111	102	111	I	80	138	154	91	5.3	4.57	0	lalt	TRUE	0.589137	2	0	FALSE	-4.96382	-11.2217	3.48679	FALSE	FALSE	16	0.0155307	6.00873	4.63495	0.00394469
112	102	112	A	20	3	121	112	4.78	5.08	0	lalt	TRUE	2.23585	2	0	FALSE	8.36633	16.7072	15.1925	FALSE	FALSE	3	0.0132585	6.23693	4.6436	0.00386414
113	102	113	O	40	138	154	91	4.76	3.91	1	lalt	FALSE	0.503744	2	0	FALSE	7.49939	11.2872	-26.7374	FALSE	FALSE	22	0.0671141	3.89724	4.63819	0.00245241
114	102	114	R	20	0	168	107	5.35	3.83	0	ralt	FALSE	2.23864	2	0.166571	FALSE	-8.8321	-16.8694	3.07767	FALSE	FALSE	26	0.0119497	6.38688	4.64753	0.00260872
115	102	115	O	40	138	154	91	4.01	4.6	1	ralt	TRUE	1.29248	2	0.28	FALSE	15.8145	-3.94583	16.0131	FALSE	FALSE	22	0.0728477	3.77897	4.64143	0.00255182
116	102	116	O	40	75	124	89	4.37	3.68	0	lalt	TRUE	1.36445	2	0	FALSE	-17.247	-30.6412	11.0059	FALSE	FALSE	23	0.00372393	8.06896	4.65826	0.00588975
117	102	117	D	80	138	154	91	5.29	4.31	0	lalt	TRUE	1.48641	2	0	FALSE	-6.5427	-8.88651	5.08168	FALSE	FALSE	10	0.0214576	5.54236	4.66273	0.00673944
118	102	118	R	20	76	154	68	5.38	4.19	1	ralt	TRUE	1.41727	2	0	FALSE	8.61534	-11.6907	7.02771	FALSE	FALSE	24	0.0648125	3.94758	4.6577	0.0016225
119	102	119	R	20	76	154	68	4.97	5.41	1	ralt	TRUE	1.09612	2	0.368857	FALSE	4.44237	13.0166	-47.6897	FALSE	FALSE	24	0.070846	3.81917	4.65194	0.00162083
120	102	120	R	20	3	121	112	5.01	4.81	0	lalt	TRUE	0.743023	3	0.401429	TRUE	8.34561	31.7123	18.1886	FALSE	FALSE	27	0.00761974	7.03604	4.66407	0.00337658
121	102	121	D	80	0	168	107	4.1	5.45	1	lalt	FALSE	0.453846	3	0	FALSE	3.26795	2.92339	8.35134	FALSE	FALSE	8	0.0936186	3.41706	4.6559	0.00325608
122	102	122	T	40	157	193	131	4.41	4.12	1	lalt	FALSE	1.45176	3	0	FALSE	17.2963	3.6663	-8.16988	FALSE	FALSE	31	0.0629329	3.99004	4.6513	0.000628484
123	102	123	R	20	76	154	68	4.39	4.28	1	ralt	TRUE	0.951749	3	0	FALSE	-6.65854	-3.74088	-1.86538	FALSE	FALSE	24	0.075353	3.73019	4.64521	0.000691512
124	102	124	D	80	0	168	107	4.2	4.37	1	ralt	TRUE	2.36457	3	0	FALSE	-5.71838	-1.15992	-9.01903	FALSE	FALSE	8	0.0981132	3.34941	4.63691	0.000531257
125	102	125	D	80	157	193	131	4.4	3.86	0	lalt	TRUE	1.18052	3	0	FALSE	5.03651	4.60431	-16.7949	FALSE	FALSE	7	0.00140631	9.47387	4.65725	0.00971371
126	102	126	O	40	157	193	131	5.32	4.67	0	lalt	TRUE	0.955537	3	0	FALSE	13.0217	33.0544	-5.50926	FALSE	FALSE	19	0.00384347	8.02338	4.67302	0.0142841
127	102	127	I	80	76	154	68	4.25	5.07	0	lalt	TRUE	0.811411	3	0	FALSE	8.81844	-1.13466	36.7181	FALSE	FALSE	12	0.0140063	6.15779	4.6804	0.00646169
128	102	128	I	80	0	168	107	4.38	4.63	0	lalt	TRUE	0.892311	3	0	FALSE	-3.03227	-8.66692	-9.18641	FALSE	FALSE	14	0.00678785	7.20283	4.69262	0.00467669
129	102	129	I	80	3	121	112	4.09	5.44	1	ralt	TRUE	1.43919	3	0	FALSE	7.72329	13.0459	-4.53918	FALSE	FALSE	15	0.101544	3.29983	4.684	0.00322959
130	102	130	O	40	138	154	91	3.62	3.71	1	lalt	FALSE	1.22605	3	0	FALSE	14.1834	8.25651	-9.30629	FALSE	FALSE	22	0.0722892	3.79008	4.67832	0.000498882
131	102	131	D	80	3	121	112	3.73	3.84	0	lalt	TRUE	0.630194	3	0	FALSE	-4.29278	-6.96498	1.59999	FALSE	FALSE	9	0.0140097	6.15743	4.68554	0.00186366
132	102	132	T	40	157	193	131	4.37	3.64	1	lalt	FALSE	1.92208	3	0	FALSE	1.88667	-4.7962	-8.4566	FALSE	FALSE	31	0.0651393	3.94033	4.68077	0.00188571
133	102	133	I	80	3	121	112	5.09	3.94	1	ralt	TRUE	0.815188	3	0.236	FALSE	8.84541	4.60438	5.2917	FALSE	FALSE	15	0.105057	3.25075	4.67215	0.00051044
134	102	134	T	40	157	193	131	4.97	3.55	1	ralt	TRUE	1.60807	3	0	FALSE	-4.27736	-5.35988	4.87409	FALSE	FALSE	31	0.0702553	3.83125	4.66691	0.000477537
135	102	135	O	40	138	154	91	5.39	3.58	1	lalt	FALSE	0.962021	3	0	FALSE	-5.81948	-10.7015	5.77162	FALSE	FALSE	22	0.0760234	3.71741	4.6611	0.00055808
136	102	136	O	40	76	154	68	5.23	3.88	0	lalt	TRUE	1.61891	3	0	FALSE	-1.65156	-1.21307	-10.8381	FALSE	FALSE	18	0.0204037	5.61503	4.66555	0.0013047
137	102	137	R	20	76	154	68	5.3	4.81	1	ralt	TRUE	2.20073	3	0.116857	FALSE	4.4402	6.13306	-3.58076	FALSE	FALSE	24	0.0750354	3.73628	4.65992	0.0012982
138	102	138	T	40	0	168	107	4.67	4.22	0	ralt	FALSE	1.62547	3	0	FALSE	4.65272	5.82315	1.64062	FALSE	FALSE	32	0.00997614	6.6473	4.66929	0.00223172
139	102	139	I	80	75	124	89	3.64	3.65	0	lalt	TRUE	0.879389	3	0	FALSE	3.92515	-9.83612	0.430914	FALSE	FALSE	17	0.0190836	5.71153	4.67411	0.00303201
140	102	140	A	20	76	154	68	4.91	4.84	0	lalt	TRUE	1.44051	3	0	FALSE	-3.69	-0.220569	-6.01285	FALSE	FALSE	0	0.0101844	6.6175	4.68318	0.00296106
141	102	141	I	80	138	154	91	3.77	5.45	0	lalt	TRUE	0.39045	3	0	FALSE	13.1928	3.85137	-4.65445	FALSE	FALSE	16	0.0185481	5.75258	4.68808	0.00296242
142	102	142	A	20	76	154	68	4.95	4.11	0	lalt	TRUE	0.672389	3	0.104857	FALSE	4.3046	19.4376	-6.12207	FALSE	FALSE	0	0.0156879	5.9942	4.6941	0.00232457
143	102	143	O	40	138	154	91	5.12	4.08	1	lalt	FALSE	0.8023	3	0	FALSE	-0.0361875	-13.1979	9.06015	FALSE	FALSE	22	0.0782123	3.67646	4.68819	0.00147909
144	102	144	R	20	75	124	89	3.87	3.55	0	missing	FALSE		3	0	FALSE	5.78074	16.2014	-1.856	TRUE	TRUE	29	0.00807128	6.95299	4.69846	0.002458
145	102	145	I	80	0	168	107	5.27	4.9	0	lalt	TRUE	0.797179	3	0	FALSE	-0.871662	0.57409	-16.625	FALSE	FALSE	14	0.0116752	6.42041	4.70631	0.00380293
146	102	146	T	40	157	193	131	4.67	4.49	1	ralt	TRUE	2.46089	3	0.135143	FALSE	11.7972	17.9355	-7.96136	FALSE	FALSE	31	0.0711176	3.81365	4.70115	0.0018358
147	102	147	O	40	138	154	91	4.04	5.06	1	ralt	TRUE	0.865724	3	0	FALSE	15.7144	11.0249	-15.1685	FALSE	FALSE	22	0.0819672	3.60881	4.69498	0.000465261
148	102	148	T	40	138	154	91	5.44	4.72	0	ralt	FALSE	0.953739	3	0	FALSE	9.26134	17.4007	-7.1934	FALSE	FALSE	34	0.0148687	6.07157	4.70117	0.00144713
149	102	149	T	40	157	193	131	4.28	3.65	1	ralt	TRUE	0.716584	3	0	FALSE	22.3099	30.8399	-9.55871	FALSE	FALSE	31	0.0753697	3.72987	4.6957	0.00145854
150	102	150	A	20	75	124	89	4.03	4.88	1	ralt	TRUE	1.46455	3	0	FALSE	4.39419	-10.0735	14.7453	FALSE	FALSE	5	0.069791	3.84081	4.69085	0.000476971
151	102	151	O	40	0	168	107	4.28	5.23	0	lalt	TRUE	1.61946	3	0	FALSE	1.76173	-1.80124	-14.2539	FALSE	FALSE	20	0.0196751	5.66748	4.69511	0.00116549
152	102	152	A	20	3	121	112	3.96	4.81	0	lalt	TRUE	1.25331	3	0.0582857	FALSE	17.7412	11.1467	-21.0368	FALSE	FALSE	3	0.0157567	5.98789	4.70081	0.00203688
153	102	153	D	80	0	168	107	3.81	5.47	1	ralt	TRUE	1.52621	3	0.0171429	FALSE	9.53229	6.09105	-16.1137	FALSE	FALSE	8	0.0883498	3.50063	4.69429	0.0013002
154	102	154	I	80	157	193	131	4.84	4.8	0	lalt	TRUE	1.51306	3	0	FALSE	-4.08316	-6.81414	32.2321	FALSE	FALSE	13	0.00645482	7.27541	4.70535	0.00261667
155	102	155	D	80	76	154	68	4.7	4.83	0	missing	FALSE		3	0.129429	FALSE	-1.31387	-2.74629	-8.52179	TRUE	TRUE	6	0.0113603	6.45986	4.71299	0.00389659
156	102	156	A	20	75	124	89	5.44	4.64	1	ralt	TRUE	2.26458	3	0.154	FALSE	0.603248	31.5248	-24.2102	FALSE	FALSE	5	0.0728184	3.77955	4.70791	0.0016891
157	102	157	I	80	3	121	112	4.43	5.09	1	lalt	FALSE	0.421459	3	0.105714	FALSE	4.08595	11.423	-9.19982	FALSE	FALSE	15	0.0971747	3.36328	4.70081	0.000377456
158	102	158	O	40	138	154	91	4.44	3.93	1	missing	FALSE		3	0	FALSE	4.7935	0.00690286	-3.53056	TRUE	TRUE	22	0.0824742	3.59991	4.69495	0.000343952
159	102	159	A	20	0	168	107	5.49	4.37	0	lalt	TRUE	0.673164	3	0	FALSE	-5.76201	-13.7719	5.04205	FALSE	FALSE	2	0.0182874	5.77301	4.69952	0.00109694
160	102	160	T	40	157	193	131	4.56	4.65	1	ralt	TRUE	0.943077	3	0	FALSE	13.5995	3.20303	-31.0105	FALSE	FALSE	31	0.0762418	3.71327	4.6943	0.00110727
161	102	161	D	80	0	168	107	3.85	5.25	1	ralt	TRUE	0.674986	3	0.129143	FALSE	15.2809	23.9406	-2.27309	FALSE	FALSE	8	0.0898381	3.47653	4.68796	0.000366515
162	102	162	O	40	138	154	91	3.96	5.2	1	ralt	TRUE	0.741968	3	0.120571	FALSE	3.88426	-3.58995	10.2225	FALSE	FALSE	22	0.0858586	3.54189	4.68201	0.000336876
163	102	163	T	40	157	193	131	4.08	4.6	1	ralt	TRUE	0.800016	3	0	FALSE	-4.39719	11.999	-2.43618	FALSE	FALSE	31	0.0801176	3.64174	4.67661	0.000357135
164	102	164	D	80	157	193	131	4	3.74	0	lalt	TRUE	1.28381	3	0	FALSE	-11.2987	0.399217	3.58421	FALSE	FALSE	7	0.00613208	7.34941	4.68757	0.00250005
165	102	165	R	20	76	154	68	5.29	4.4	1	ralt	TRUE	1.76481	3	0.177143	FALSE	-2.26042	-2.25393	-7.58326	FALSE	FALSE	24	0.0695579	3.84564	4.68317	0.00251813
166	102	166	D	80	157	193	131	5.42	3.9	0	lalt	TRUE	0.60969	3	0	FALSE	3.61458	12.8539	0.92925	FALSE	FALSE	7	0.0110219	6.50349	4.69076	0.0015774
167	102	167	A	20	75	124	89	4.08	4.51	1	missing	FALSE		3	0.0637143	FALSE	4.48682	23.8775	-13.5436	TRUE	TRUE	5	0.0737987	3.76026	4.68598	0.00155387
168	102	168	I	80	0	168	107	4.39	4.55	0	lalt	TRUE	0.882429	3	0	FALSE	6.32701	-0.194177	14.4732	FALSE	FALSE	14	0.0152608	6.03402	4.69155	0.00118631
169	102	169	A	20	75	124	89	4.25	4.07	1	ralt	TRUE	0.748412	3	0.134857	FALSE	4.74423	19.9031	-20.4058	FALSE	FALSE	5	0.0779567	3.68118	4.68645	0.00116686
170	102	170	O	40	138	154	91	4.44	3.96	1	ralt	TRUE	1.64432	3	0.134286	FALSE	-2.67278	-11.7586	-11.4897	FALSE	FALSE	22	0.0873786	3.51658	4.68062	0.000335978
171	102	171	T	40	3	121	112	4.16	4.75	0	lalt	TRUE	0.857344	3	0.135429	FALSE	10.3049	26.4697	2.88765	FALSE	FALSE	33	0.0110291	6.50254	4.68806	0.00145799
172	102	172	D	80	76	154	68	5.06	4	0	lalt	TRUE	0.964216	3	0.120571	FALSE	9.66889	-13.5416	3.08923	FALSE	FALSE	6	0.0152395	6.03604	4.69354	0.00225261
173	102	173	T	40	157	193	131	5	5.01	1	ralt	TRUE	2.2221	3	0.165714	FALSE	1.20597	20.8591	-26.1667	FALSE	FALSE	31	0.0810689	3.62471	4.68827	0.00111787
174	102	174	A	20	75	124	89	4.54	4.23	1	ralt	TRUE	2.1158	3	0.329143	FALSE	-7.30377	-3.77038	34.6064	FALSE	FALSE	5	0.0808625	3.62838	4.68306	0.000330178
175	102	175	R	20	76	154	68	5.02	4.38	1	ralt	TRUE	1.09482	3	0	FALSE	-16.0114	-33.0207	17.7798	FALSE	FALSE	24	0.0710006	3.81602	4.67877	0.00035418
176	102	176	T	40	75	124	89	4.99	4.43	0	lalt	TRUE	1.99261	3	0.115714	FALSE	27.9398	-16.6015	-10.2847	FALSE	FALSE	35	0.0137059	6.18905	4.68482	0.00120814
177	102	177	O	40	138	154	91	3.64	5.13	1	ralt	TRUE	0.850513	3	0	FALSE	12.2277	14.0547	-24.0269	FALSE	FALSE	22	0.0892019	3.48678	4.67907	0.00115701
178	102	178	O	40	157	193	131	3.8	4.28	0	lalt	TRUE	0.880499	3	0	FALSE	-5.43173	-15.9775	16.0501	FALSE	FALSE	19	0.00758244	7.04312	4.68834	0.00185004
179	102	179	T	40	75	124	89	5.27	5.09	0	lalt	TRUE	2.39237	3	0	FALSE	11.1152	4.99362	-11.7065	FALSE	FALSE	35	0.0181659	5.78263	4.69263	0.0024592
180	102	180	A	20	138	154	91	5.43	3.61	0	lalt	TRUE	0.74446	4	0	FALSE	-8.0573	-15.3649	17.7912	FALSE	FALSE	4	0.0131901	6.2444	4.69875	0.00177502
181	102	181	R	20	138	154	91	4.32	3.77	0	lalt	TRUE	0.887416	4	0	FALSE	1.19658	-3.40833	-2.14455	FALSE	FALSE	28	0.0118251	6.40201	4.70543	0.00213277
182	102	182	D	80	3	121	112	3.66	5.38	0	ralt	FALSE	1.49839	4	0.176571	FALSE	0.949618	6.92502	2.90963	FALSE	FALSE	9	0.0153194	6.0285	4.71058	0.00198316
183	102	183	D	80	0	168	107	3.73	4.92	1	ralt	TRUE	0.931318	4	0	FALSE	9.08541	10.2833	-11.1422	FALSE	FALSE	8	0.0853795	3.54997	4.70515	0.00100861
184	102	184	R	20	76	154	68	3.76	4.55	1	ralt	TRUE	1.02727	4	0	FALSE	3.38872	-16.4871	0.367787	FALSE	FALSE	24	0.0726415	3.78306	4.70079	0.000312207
185	102	185	I	80	76	154	68	4.74	4.94	0	lalt	TRUE	0.932222	4	0	FALSE	-2.02489	-4.2173	-5.18934	FALSE	FALSE	12	0.0148553	6.07288	4.70608	0.00104253
186	102	186	I	80	3	121	112	4.63	3.9	1	ralt	TRUE	0.618206	4	0	FALSE	3.88896	-2.45633	6.21176	FALSE	FALSE	15	0.0889852	3.49029	4.70049	0.00100085
187	102	187	T	40	157	193	131	3.75	4.84	1	ralt	TRUE	1.75911	4	0.116	FALSE	3.91552	3.50898	1.15821	FALSE	FALSE	31	0.0804637	3.63552	4.69557	0.000278707
188	102	188	R	20	0	168	107	4.2	5.33	0	ralt	FALSE	1.30805	4	0	FALSE	11.6644	9.06003	-3.83721	FALSE	FALSE	26	0.0124663	6.32582	4.7018	0.00114942
189	102	189	R	20	76	154	68	3.56	4.26	1	ralt	TRUE	0.50095	4	0	FALSE	0.0544186	5.58715	-12.2153	FALSE	FALSE	24	0.0754717	3.72792	4.69732	0.0011543
190	102	190	O	40	3	121	112	3.8	3.7	0	lalt	TRUE	0.897988	4	0	FALSE	-1.93514	-9.66187	-0.78009	FALSE	FALSE	21	0.0160294	5.96314	4.7021	0.000933293
191	102	191	R	20	3	121	112	4.31	4.22	0	lalt	TRUE	0.524095	4	0	FALSE	0.277251	-1.80279	2.62871	FALSE	FALSE	27	0.00964176	6.69649	4.7096	0.00201175
192	102	192	A	20	75	124	89	5.18	5.07	1	ralt	TRUE	1.38604	4	0	FALSE	8.29943	2.07012	-0.230709	FALSE	FALSE	5	0.0788646	3.66448	4.70488	0.00137622
193	102	193	I	80	3	121	112	5.15	5.13	1	ralt	TRUE	0.286935	4	0	FALSE	9.12676	9.45447	-7.94723	FALSE	FALSE	15	0.090632	3.46384	4.69935	0.000265155
194	102	194	R	20	76	154	68	5.27	3.64	1	ralt	TRUE	1.97365	4	0	FALSE	-3.55101	-17.474	10.0983	FALSE	FALSE	24	0.0781788	3.67708	4.69476	0.000264245
195	102	195	R	20	0	168	107	3.59	4.27	0	lalt	TRUE	1.40956	4	0	FALSE	-9.24154	2.44492	-4.41591	FALSE	FALSE	26	0.0164175	5.92862	4.69934	0.000871894
196	102	196	O	40	75	124	89	4.47	3.83	0	lalt	TRUE	0.909526	4	0	FALSE	-1.02864	-6.45905	1.33025	FALSE	FALSE	23	0.00675016	7.21086	4.70848	0.00235344
197	102	197	T	40	157	193	131	4.56	5.17	1	ralt	TRUE	0.750606	4	0	FALSE	3.30233	1.33412	1.62826	FALSE	FALSE	31	0.0813021	3.62056	4.70368	0.001754
198	102	198	T	40	0	168	107	4.93	5.1	0	ralt	FALSE	0.803495	4	0.126286	FALSE	-1.7537	1.74472	-12.2376	FALSE	FALSE	32	0.0116917	6.41838	4.70999	0.00111256
199	102	199	A	20	75	124	89	3.95	3.8	1	lalt	FALSE	1.76322	4	0.0111429	FALSE	-3.58099	-8.61083	10.958	FALSE	FALSE	5	0.0807708	3.63002	4.70526	0.00110776
200	102	200	A	20	75	124	89	3.95	3.57	1	ralt	TRUE	0.528327	4	0	FALSE	-10.2585	-7.63214	-0.625823	FALSE	FALSE	5	0.0846658	3.56208	4.7003	0.000568336
201	102	201	R	20	157	193	131	5.08	4.08	0	lalt	TRUE	0.926404	4	0	FALSE	10.0147	1.4222	7.2318	FALSE	FALSE	25	0.00851843	6.8752	4.70815	0.001399
202	102	202	O	40	138	154	91	5.34	5.16	1	ralt	TRUE	1.02132	4	0	FALSE	-2.14046	5.52763	-6.30157	FALSE	FALSE	22	0.0840336	3.57289	4.70327	0.00139322
203	102	203	O	40	157	193	131	5.25	5.1	0	lalt	TRUE	1.51108	4	0	FALSE	-2.38123	0.208497	-7.33575	FALSE	FALSE	19	0.0109734	6.50985	4.70978	0.00112052
204	102	204	I	80	157	193	131	3.53	5.4	0	lalt	TRUE	0.370929	4	0	FALSE	5.12147	2.97471	-1.2374	FALSE	FALSE	13	0.00927673	6.75217	4.71709	0.00214775
205	102	205	T	40	157	193	131	5.5	4.52	1	lalt	FALSE	1.24087	4	0	FALSE	3.23679	-9.21498	12.7573	FALSE	FALSE	31	0.0827527	3.59505	4.71232	0.0012715
206	102	206	T	40	157	193	131	5.22	4.25	1	ralt	TRUE	2.14961	4	0	FALSE	-2.46953	-10.5745	-0.154229	FALSE	FALSE	31	0.086543	3.53044	4.70733	0.000527292
207	102	207	A	20	76	154	68	4.39	4.88	0	ralt	FALSE	1.69441	4	0	FALSE	0.325849	2.95966	-11.5336	FALSE	FALSE	0	0.0156068	6.00168	4.71193	0.000809066
208	102	208	T	40	3	121	112	4.3	5.25	0	lalt	TRUE	1.05428	4	0.113429	FALSE	3.44691	8.73898	-4.72217	FALSE	FALSE	33	0.013455	6.21571	4.71726	0.00148509
209	102	209	A	20	75	124	89	5.17	5.12	1	ralt	TRUE	0.601223	4	0	FALSE	-2.97757	-3.051	3.97904	FALSE	FALSE	5	0.0856373	3.54562	4.71237	0.000903847
210	102	210	D	80	0	168	107	3.68	3.64	1	ralt	TRUE	0.935077	4	0.219429	FALSE	8.73794	-14.5398	-0.830416	FALSE	FALSE	8	0.0800736	3.64253	4.70791	0.000235294
211	102	211	T	40	0	168	107	3.75	4.27	0	lalt	TRUE	2.01906	4	0	FALSE	4.12528	0.919162	3.58148	FALSE	FALSE	32	0.0151249	6.04693	4.7126	0.000815197
212	102	212	R	20	3	121	112	4.98	4.51	0	lalt	TRUE	0.649121	4	0	FALSE	1.15932	-5.77028	17.0394	FALSE	FALSE	27	0.0128576	6.28124	4.71809	0.00149359
213	102	213	D	80	0	168	107	5.28	5.19	1	ralt	TRUE	2.26889	4	0	FALSE	-7.23432	-6.08636	9.29737	FALSE	FALSE	8	0.083125	3.58857	4.71344	0.000913609
214	102	214	R	20	76	154	68	3.78	4.31	1	missing	FALSE		4	0	FALSE	-0.834678	-2.48074	-8.13803	TRUE	TRUE	24	0.0759245	3.71929	4.70934	0.000239438
215	102	215	O	40	138	154	91	5.46	4.08	1	ralt	TRUE	2.06043	4	0	FALSE	4.03048	1.66123	-5.50041	FALSE	FALSE	22	0.0836653	3.57923	4.70474	0.000236744
216	102	216	A	20	138	154	91	4.02	4.84	0	missing	FALSE		4	0	FALSE	2.68954	4.65737	10.714	TRUE	TRUE	4	0.015274	6.03277	4.70931	0.000772169
217	102	217	O	40	157	193	131	4.17	4.75	0	lalt	TRUE	1.09114	4	0.158857	FALSE	1.30735	-1.27675	-13.6908	FALSE	FALSE	19	0.0143187	6.12595	4.71418	0.00135654
218	102	218	R	20	76	154	68	3.56	5.47	1	ralt	TRUE	2.40892	4	0	FALSE	14.8807	11.9215	-5.48563	FALSE	FALSE	24	0.0786659	3.66812	4.70995	0.00081221
219	102	219	O	40	75	124	89	3.89	4.77	0	lalt	TRUE	2.10478	4	0	FALSE	-1.28242	-0.386119	-23.9021	FALSE	FALSE	23	0.0100629	6.63481	4.7165	0.00107254
220	102	220	D	80	0	168	107	5.33	4.39	1	ralt	TRUE	0.772728	4	0	FALSE	14.9987	13.0567	14.2944	FALSE	FALSE	8	0.0847583	3.5605	4.71189	0.00105777
221	102	221	T	40	138	154	91	4.14	4.26	0	ralt	FALSE	1.4196	4	0	FALSE	7.90766	-19.874	5.31416	FALSE	FALSE	34	0.0145364	6.10419	4.71661	0.000772691
222	102	222	D	80	0	168	107	3.51	5.12	1	ralt	TRUE	0.652531	4	0.104	FALSE	21.2967	20.1701	-19.185	FALSE	FALSE	8	0.0879772	3.50673	4.71183	0.000764385
223	102	223	I	80	157	193	131	5.28	4.12	0	lalt	TRUE	1.5245	4	0	FALSE	8.67033	-6.40131	-2.33029	FALSE	FALSE	13	0.0124572	6.32688	4.71727	0.000860278
224	102	224	I	80	3	121	112	5.18	3.82	1	ralt	TRUE	0.765405	4	0.146571	FALSE	8.51377	5.78155	5.47082	FALSE	FALSE	15	0.083672	3.57911	4.71279	0.000862273
225	102	225	A	20	3	121	112	3.91	4.49	0	lalt	TRUE	0.588489	4	0	FALSE	-1.91786	-6.44839	16.7913	FALSE	FALSE	3	0.0151811	6.04158	4.71723	0.000725239
226	102	226	O	40	138	154	91	4.13	5.39	1	ralt	TRUE	1.13738	4	0	FALSE	-7.34692	6.72669	-5.42485	FALSE	FALSE	22	0.0839695	3.57399	4.71277	0.000721278
227	102	227	R	20	157	193	131	3.97	5.21	0	lalt	TRUE	0.797293	4	0	FALSE	17.9563	33.2954	-20.5971	FALSE	FALSE	25	0.0114786	6.44491	4.71852	0.000899762
228	102	228	R	20	76	154	68	4.58	3.95	1	ralt	TRUE	1.08117	4	0	FALSE	5.3585	1.38538	-20.9159	FALSE	FALSE	24	0.079474	3.65337	4.71439	0.000902352
229	102	229	O	40	75	124	89	4.16	3.67	0	lalt	TRUE	1.20315	4	0	FALSE	2.66979	-15.3558	2.74864	FALSE	FALSE	23	0.0134567	6.21553	4.71934	0.000784189
230	102	230	I	80	3	121	112	5.22	3.86	1	ralt	TRUE	1.67611	4	0	FALSE	-13.5164	-15.7597	29.8224	FALSE	FALSE	15	0.085544	3.54719	4.71484	0.000771665
231	102	231	R	20	3	121	112	4.18	4.14	0	lalt	TRUE	0.63705	4	0	FALSE	3.2673	-28.41	-5.05426	FALSE	FALSE	27	0.0156879	5.9942	4.71903	0.000673018
232	102	232	D	80	157	193	131	5.48	5.3	0	lalt	TRUE	0.525088	4	0.243714	FALSE	8.68143	7.54323	-14.849	FALSE	FALSE	7	0.0120389	6.37616	4.72445	0.00131103
233	102	233	I	80	3	121	112	3.79	4.05	1	ralt	TRUE	0.318929	4	0	FALSE	5.34391	10.5197	3.98933	FALSE	FALSE	15	0.0883075	3.50132	4.71981	0.000824864
234	102	234	R	20	75	124	89	5.28	5.43	0	ralt	FALSE	0.823988	4	0	FALSE	33.2201	33.1227	-12.878	FALSE	FALSE	29	0.00908456	6.78237	4.72647	0.00103301
235	102	235	T	40	157	193	131	5.19	5.42	1	ralt	TRUE	1.49276	4	0.131143	FALSE	15.0383	12.3547	2.67294	FALSE	FALSE	31	0.0809719	3.62643	4.72232	0.00103831
236	102	236	R	20	138	154	91	4.18	4.45	0	lalt	TRUE	0.780519	4	0	FALSE	-0.609338	-7.78101	5.91137	FALSE	FALSE	28	0.0131104	6.25314	4.72726	0.000759754
237	102	237	D	80	0	168	107	5.12	4.13	1	ralt	TRUE	1.98438	4	0	FALSE	0.299498	-11.6503	4.06242	FALSE	FALSE	8	0.0868063	3.52606	4.72277	0.000748491
238	102	238	R	20	157	193	131	3.83	4.29	0	lalt	TRUE	0.416363	4	0	FALSE	6.22041	-4.48979	10.006	FALSE	FALSE	25	0.0146674	6.09124	4.72715	0.00067525
239	102	239	R	20	75	124	89	5.47	5.43	0	ralt	FALSE	0.893385	4	0	FALSE	-6.2437	-9.31907	-10.4024	FALSE	FALSE	29	0.0125557	6.31551	4.73223	0.00125708
240	103	0	I	20	3	121	112	4.31	4.86	0	lalt	FALSE	0.644524	1	0.122857	FALSE	1.2551	-0.893675	1.88603	FALSE	FALSE	15	0.0157233	5.99095	4.55868	0.0226115
241	103	1	T	40	3	121	112	4.65	4.48	0	lalt	FALSE	0.722602	1	0.0242857	FALSE	7.68597	-4.67289	0.0619486	FALSE	FALSE	33	0.0152983	6.03048	4.57538	0.0430068
242	103	2	D	80	138	154	91	4	4.74	0	ralt	TRUE	0.866667	1	0.238857	FALSE	0.166818	-20.7192	10.3783	FALSE	FALSE	10	0.0134062	6.22096	4.5944	0.0436542
243	103	3	R	20	138	154	91	5.22	4.54	0	ralt	TRUE	0.709797	1	0.116571	FALSE	3.55048	-8.12065	4.05978	FALSE	FALSE	28	0.0159652	5.96893	4.60923	0.04119
244	103	4	O	80	138	154	91	4.98	5.04	0	ralt	TRUE	0.688865	1	0.253714	FALSE	-0.608298	-6.38104	-5.38228	FALSE	FALSE	22	0.00566038	7.46489	4.6416	0.055449
245	103	5	A	40	3	121	112	5.06	5.1	0	lalt	FALSE	0.683903	1	0.468286	TRUE	8.15631	8.33945	4.56774	FALSE	FALSE	3	0.016567	5.91555	4.65449	0.0529927
246	103	6	D	80	75	124	89	4.79	4.13	0	ralt	TRUE	1.29185	1	0.333714	FALSE	7.76159	-21.8658	12.0362	FALSE	FALSE	11	0.00269541	8.53528	4.69331	0.0676542
247	103	7	O	80	3	121	112	4.48	4.63	0	ralt	TRUE	0.961956	1	0.224571	FALSE	16.7346	-0.268373	-2.53928	FALSE	FALSE	21	0.00658184	7.24729	4.72094	0.0799021
248	103	8	T	40	76	154	68	3.64	4.03	0	ralt	TRUE	0.489979	1	0.123429	FALSE	6.18051	1.53328	5.48247	FALSE	FALSE	30	0.0128645	6.28046	4.73693	0.0476759
249	103	9	R	20	0	168	107	4.65	4.81	0	missing	FALSE		1	0.117429	FALSE	17.1426	17.3716	-4.72091	TRUE	TRUE	26	0.0201258	5.63481	4.74369	0.0303137
250	103	10	A	40	3	121	112	3.75	5.18	0	lalt	FALSE	0.858196	1	0.261714	FALSE	7.94315	-5.50873	6.14656	FALSE	FALSE	3	0.0365053	4.77575	4.73698	0.0192025
251	103	11	D	80	157	193	131	4.68	3.67	0	ralt	TRUE	0.498323	1	0.275714	FALSE	0.327839	-2.08528	-7.62313	FALSE	FALSE	7	0.00361301	8.11258	4.76982	0.044077
252	103	12	A	40	157	193	131	4.49	4.72	1	ralt	FALSE	0.434518	1	0.228	FALSE	5.13344	6.55088	3.87864	FALSE	FALSE	1	0.0636792	3.97303	4.7495	0.0401557
253	103	13	T	40	157	193	131	5.08	4.15	0	ralt	TRUE	0.454588	1	0.231714	FALSE	-0.747411	-10.4107	5.47046	FALSE	FALSE	31	0.012707	6.29824	4.76478	0.0190816
254	103	14	T	40	0	168	107	5.28	5.06	0	ralt	TRUE	0.954711	1	0.244571	FALSE	8.20757	-1.88332	0.40049	FALSE	FALSE	32	0.0192453	5.69935	4.77212	0.0258044
255	103	15	D	80	3	121	112	4.39	3.8	1	ralt	FALSE	0.608667	1	0.246286	FALSE	11.7761	-0.565336	7.4673	FALSE	FALSE	9	0.0932297	3.42307	4.74371	0.0126857
256	103	16	D	80	76	154	68	3.87	3.81	0	ralt	TRUE	0.567883	1	0.336857	FALSE	-8.4491	-18.3784	2.39094	FALSE	FALSE	6	0.0032656	8.25844	4.77606	0.0358603
257	103	17	A	40	75	124	89	3.6	4.61	0	lalt	FALSE	1.04803	1	0.732857	TRUE	2.95487	-1.5254	11.7601	FALSE	FALSE	5	0.0128159	6.28592	4.79038	0.0464753
258	103	18	T	40	138	154	91	5.09	4.07	1	ralt	FALSE	0.536229	1	0.159143	FALSE	10.1944	-2.45771	2.44917	FALSE	FALSE	34	0.0471698	4.40599	4.77905	0.0172428
259	103	19	I	20	75	124	89	4.19	3.89	1	ralt	FALSE	0.806237	1	0.361429	FALSE	8.84174	-1.02088	-10.6507	FALSE	FALSE	17	0.0349914	4.83685	4.77455	0.00932326
260	103	20	O	80	0	168	107	4.42	5.47	1	ralt	FALSE	0.501484	1	0.343429	FALSE	8.49674	-6.1132	2.21011	FALSE	FALSE	20	0.0838949	3.57527	4.75121	0.00727506
261	103	21	D	80	76	154	68	4.69	5.42	0	lalt	FALSE	0.47556	1	0.416857	TRUE	1.79971	-9.58353	-0.450806	FALSE	FALSE	6	0.020523	5.60661	4.75771	0.0100689
262	103	22	I	20	75	124	89	3.79	3.88	1	lalt	TRUE	0.767532	1	0.372571	FALSE	4.80607	5.16046	3.85589	FALSE	FALSE	17	0.0504229	4.30978	4.74655	0.01125
263	103	23	T	40	138	154	91	4.79	5.16	1	lalt	TRUE	0.692753	1	0.145429	FALSE	3.90058	-7.36545	6.65155	FALSE	FALSE	34	0.0601215	4.05597	4.73213	0.00599858
264	103	24	T	40	138	154	91	3.84	5.19	1	lalt	TRUE	0.58483	1	0.260571	FALSE	1.68756	-4.03217	5.74224	FALSE	FALSE	34	0.0757862	3.72192	4.71334	0.0105678
265	103	25	I	20	75	124	89	4.08	3.75	1	ralt	FALSE	0.571934	1	0.116857	FALSE	11.7387	-1.8677	-2.40276	FALSE	FALSE	17	0.0643365	3.95822	4.69861	0.00436285
266	103	26	A	40	157	193	131	5.33	4.44	1	ralt	FALSE	0.606154	1	0.352571	FALSE	1.73158	-3.119	2.01782	FALSE	FALSE	1	0.0654291	3.93392	4.68404	0.00457
267	103	27	A	40	157	193	131	3.6	4.77	1	lalt	TRUE	0.438212	1	0.230571	FALSE	8.25121	16.897	-11.2295	FALSE	FALSE	1	0.0802636	3.63911	4.6658	0.00891741
268	103	28	O	80	0	168	107	4.84	5.48	1	lalt	TRUE	0.973345	1	0.256857	FALSE	11.4954	-3.60244	6.27964	FALSE	FALSE	20	0.089033	3.48952	4.64603	0.00320827
269	103	29	A	40	157	193	131	4.5	5.5	1	lalt	TRUE	0.468337	1	0.238286	FALSE	-4.1089	-13.4367	10.1836	FALSE	FALSE	1	0.0931785	3.42386	4.62597	0.00285143
270	103	30	I	20	75	124	89	4.75	4.01	1	lalt	TRUE	0.387422	1	0.119143	FALSE	-0.935192	-5.22741	2.34939	FALSE	FALSE	17	0.0746141	3.74441	4.61092	0.003083
271	103	31	I	20	157	193	131	3.75	3.63	0	lalt	FALSE	0.308536	1	0.237714	FALSE	1.28082	-6.26219	10.6104	FALSE	FALSE	13	0.0160518	5.96112	4.6232	0.00911777
272	103	32	A	40	138	154	91	3.71	4.23	0	ralt	TRUE	0.615813	1	0.0614286	FALSE	6.8246	-0.9224	0.483853	FALSE	FALSE	4	0.00665927	7.23042	4.64664	0.0215057
273	103	33	I	20	3	121	112	3.86	4.81	0	ralt	TRUE	0.566933	1	0.114571	FALSE	4.80646	3.67086	2.3726	FALSE	FALSE	15	0.0226962	5.46141	4.65292	0.0192014
274	103	34	A	40	157	193	131	4.94	3.55	1	lalt	TRUE	0.601057	1	0.312571	FALSE	5.72627	-6.88342	-13.1871	FALSE	FALSE	1	0.100809	3.31031	4.63278	0.00622114
275	103	35	O	80	0	168	107	4.92	3.68	1	lalt	TRUE	0.820271	1	0.382	FALSE	-0.60296	-2.36764	10.0182	FALSE	FALSE	20	0.0943396	3.40599	4.61445	0.00221638
276	103	36	D	80	138	154	91	4.11	5.43	0	ralt	TRUE	1.04937	1	0.302	FALSE	4.51864	-18.1285	16.4814	FALSE	FALSE	10	0.0209644	5.57592	4.62231	0.00630203
277	103	37	R	20	76	154	68	3.84	4.14	1	ralt	FALSE	0.801441	1	0.357143	FALSE	15.6906	6.284	-11.3438	FALSE	FALSE	24	0.0286896	5.12333	4.62516	0.00888838
278	103	38	A	40	0	168	107	4.43	4.31	0	ralt	TRUE	0.948661	1	0.111143	FALSE	3.88501	-11.0277	1.55801	FALSE	FALSE	2	0.00764916	7.03048	4.64595	0.0148953
279	103	39	D	80	3	121	112	4.6	3.76	1	lalt	TRUE	0.887718	1	0.117143	FALSE	5.92457	-16.3103	7.81845	FALSE	FALSE	9	0.0767296	3.70407	4.63212	0.0123223
280	103	40	T	40	138	154	91	4.84	4.96	1	ralt	FALSE	0.83687	1	0.372857	FALSE	2.97664	1.86273	8.35889	FALSE	FALSE	34	0.0729891	3.77618	4.61953	0.00264139
281	103	41	T	40	138	154	91	3.85	5.46	1	lalt	TRUE	0.25792	1	0.218857	FALSE	5.20474	-8.04922	-3.87475	FALSE	FALSE	34	0.0850282	3.55592	4.60467	0.0055039
282	103	42	O	80	0	168	107	3.88	3.53	1	lalt	TRUE	0.966068	1	0.602571	TRUE	1.05283	-8.93227	8.50513	FALSE	FALSE	20	0.0986938	3.3409	4.58765	0.0019962
283	103	43	O	80	0	168	107	3.96	4	1	lalt	TRUE	0.462249	1	0.616857	TRUE	5.44894	29.0936	-24.7637	FALSE	FALSE	20	0.110103	3.18308	4.56921	0.00386667
284	103	44	D	80	3	121	112	5.24	5.35	1	ralt	FALSE	1.55638	1	0.347429	FALSE	1.5473	-11.7143	9.98199	FALSE	FALSE	9	0.084434	3.56603	4.55567	0.00179735
285	103	45	R	20	76	154	68	5.12	4.4	1	lalt	TRUE	0.720323	1	0.00885714	FALSE	9.44023	1.81879	-11.3419	FALSE	FALSE	24	0.0382017	4.71022	4.55509	0.00338445
286	103	46	I	20	75	124	89	4.44	5.42	1	ralt	FALSE	1.06145	1	0.123143	FALSE	10.0283	-2.05901	9.23102	FALSE	FALSE	17	0.0722503	3.79085	4.5446	0.00351221
287	103	47	I	20	157	193	131	4.06	5.4	0	lalt	FALSE	0.473479	1	0.114571	FALSE	11.5894	-0.362322	-1.09461	FALSE	FALSE	13	0.0250057	5.3216	4.55035	0.00455663
288	103	48	I	20	138	154	91	5.32	4.4	0	lalt	FALSE	0.347575	1	0.111143	FALSE	8.044	5.95432	1.86514	FALSE	FALSE	16	0.0074124	7.07584	4.57076	0.0125568
289	103	49	R	20	157	193	131	4.33	4.69	0	ralt	TRUE	1.00249	1	0.533429	TRUE	2.11578	-15.4346	8.58219	FALSE	FALSE	25	0.00799112	6.96739	4.59	0.0176231
290	103	50	T	40	0	168	107	3.62	3.65	0	ralt	TRUE	1.04364	1	0.122857	FALSE	8.45294	-7.26374	-3.61379	FALSE	FALSE	32	0.022817	5.45375	4.59638	0.011883
291	103	51	I	20	75	124	89	5.19	4.85	1	lalt	TRUE	0.806858	1	0.118	FALSE	4.58413	-5.09494	-5.8702	FALSE	FALSE	17	0.0795923	3.65123	4.5846	0.00435936
292	103	52	O	80	157	193	131	5.44	4.41	0	ralt	TRUE	0.942923	1	0.29	FALSE	-0.87824	-11.783	11.1348	FALSE	FALSE	19	0.00192967	9.01743	4.61411	0.0211343
293	103	53	I	20	157	193	131	4.78	3.68	0	ralt	TRUE	1.69281	1	0.118857	FALSE	12.8946	6.71647	-4.00703	FALSE	FALSE	13	0.0345559	4.85493	4.61451	0.0221603
294	103	54	A	40	0	168	107	3.61	3.56	0	ralt	TRUE	0.829976	1	0.114	FALSE	10.9213	-4.99393	-2.71976	FALSE	FALSE	2	0.0174004	5.84473	4.62389	0.00621787
295	103	55	O	80	0	168	107	4.4	3.73	1	ralt	FALSE	1.02919	1	0.381714	FALSE	4.32117	-4.35772	3.76276	FALSE	FALSE	20	0.106573	3.23009	4.60804	0.00462536
296	103	56	D	80	0	168	107	3.57	4.52	0	lalt	FALSE	0.741359	1	0.115714	FALSE	5.17044	-2.69205	6.29565	FALSE	FALSE	8	0.00307629	8.34459	4.63373	0.0150053
297	103	57	D	80	3	121	112	5.24	4.94	1	lalt	TRUE	0.50355	1	0.358571	FALSE	3.19158	1.81337	-7.99013	FALSE	FALSE	9	0.0833841	3.58408	4.6217	0.0150334
298	103	58	I	20	75	124	89	3.89	4.63	1	lalt	TRUE	1.07855	1	0.512857	TRUE	-10.7227	-16.3379	0.850646	FALSE	FALSE	17	0.0843035	3.56826	4.60977	0.00153557
299	103	59	D	80	3	121	112	5.39	3.63	1	ralt	FALSE	1.46063	1	0.428571	TRUE	2.14835	-7.41841	4.65594	FALSE	FALSE	9	0.0921549	3.4398	4.59683	0.00142051
300	103	60	T	40	75	124	89	3.58	5.37	0	ralt	TRUE	0.975238	2	0.837714	TRUE	1.43348	0.828328	3.1964	FALSE	FALSE	35	0.00766509	7.02748	4.61468	0.00779204
301	103	61	A	40	157	193	131	5.46	3.69	1	ralt	FALSE	1.00827	2	0.37	FALSE	3.29765	-0.236033	18.2696	FALSE	FALSE	1	0.0830578	3.58974	4.60342	0.00778325
302	103	62	A	40	0	168	107	5.06	4.42	0	ralt	TRUE	0.667385	2	0.122571	FALSE	2.45198	5.92224	-11.7099	FALSE	FALSE	2	0.0261841	5.25517	4.60755	0.00309987
303	103	63	O	80	0	168	107	5.07	4.38	1	lalt	TRUE	0.800445	2	0.126	FALSE	11.6076	-2.10279	-0.178139	FALSE	FALSE	20	0.108062	3.21007	4.593	0.00286562
304	103	64	O	80	76	154	68	4.24	3.69	0	ralt	TRUE	1.30848	2	0.136571	FALSE	3.10505	-1.498	-1.51496	FALSE	FALSE	18	0.00226415	8.78681	4.61928	0.0156737
305	103	65	R	20	76	154	68	4.99	4.16	1	lalt	TRUE	0.574674	2	0.113143	FALSE	-7.6732	-6.06682	4.54439	FALSE	FALSE	24	0.040538	4.62458	4.6178	0.0164831
306	103	66	R	20	76	154	68	4.07	4.55	1	lalt	TRUE	1.13572	2	0.235714	FALSE	-0.128048	-9.88318	7.72095	FALSE	FALSE	24	0.0499445	4.32353	4.61372	0.00566407
307	103	67	D	80	0	168	107	4.03	4.5	0	lalt	FALSE	0.819835	2	0.258857	FALSE	5.78468	2.9092	5.57313	FALSE	FALSE	8	0.0124565	6.32696	4.62588	0.00538894
308	103	68	D	80	75	124	89	5.02	3.5	0	lalt	FALSE	0.817975	2	0.253714	FALSE	16.4511	9.36296	-7.69113	FALSE	FALSE	11	0.0107039	6.54572	4.63936	0.00894273
309	103	69	D	80	3	121	112	4.76	4.4	1	lalt	TRUE	0.538108	2	0.261714	FALSE	16.2068	15.9343	-5.07322	FALSE	FALSE	9	0.0929021	3.42815	4.62732	0.00523952
310	103	70	O	80	0	168	107	4.97	4.15	1	lalt	TRUE	0.749234	2	0.124571	FALSE	-3.61897	-21.5508	19.8963	FALSE	FALSE	20	0.11036	3.17972	4.61329	0.000973968
311	103	71	R	20	3	121	112	5.46	3.54	0	ralt	TRUE	0.669317	2	0.186	FALSE	11.2793	-6.6662	-0.0549925	FALSE	FALSE	27	0.00793511	6.97753	4.62938	0.0061709
312	103	72	R	20	75	124	89	4.75	4.91	0	ralt	TRUE	0.593443	2	0.128286	FALSE	12.244	2.13581	-11.7651	FALSE	FALSE	29	0.00786164	6.99095	4.6453	0.0113785
313	103	73	D	80	3	121	112	3.66	3.97	1	ralt	FALSE	0.957476	2	0.437429	TRUE	-1.02319	-6.72276	17.7772	FALSE	FALSE	9	0.0986671	3.34129	4.63291	0.00610966
314	103	74	T	40	3	121	112	5.47	4.9	0	ralt	TRUE	0.820644	2	0.229143	FALSE	2.8641	-11.7016	6.42108	FALSE	FALSE	33	0.0142367	6.13424	4.64302	0.00382148
315	103	75	T	40	3	121	112	4.48	3.89	0	ralt	TRUE	0.983641	2	0.133429	FALSE	2.87723	2.43121	-6.84562	FALSE	FALSE	33	0.0231175	5.43487	4.64791	0.0118049
316	103	76	R	20	75	124	89	4.64	3.56	0	ralt	TRUE	0.591717	2	0.126286	FALSE	4.08745	-4.95142	-6.64819	FALSE	FALSE	29	0.0165094	5.92057	4.65628	0.00494508
317	103	77	I	20	75	124	89	4.74	4.64	1	ralt	FALSE	0.591981	2	0.208571	FALSE	5.36234	-0.406566	3.53512	FALSE	FALSE	17	0.0789781	3.6624	4.64693	0.00339126
318	103	78	T	40	138	154	91	4.93	3.76	1	ralt	FALSE	0.97406	2	0.214	FALSE	10.2501	-3.71261	5.06543	FALSE	FALSE	34	0.0662032	3.91695	4.63984	0.0012539
319	103	79	I	20	75	124	89	4.35	3.99	1	lalt	TRUE	0.670154	2	0.255714	FALSE	1.7814	-1.95479	-9.22707	FALSE	FALSE	17	0.0863002	3.53449	4.62976	0.0011794
320	103	80	D	80	138	154	91	3.94	4.12	0	lalt	FALSE	0.852232	2	0.713143	TRUE	14.7429	17.9443	-10.0036	FALSE	FALSE	10	0.0216331	5.53062	4.63533	0.00257136
321	103	81	I	20	3	121	112	4.14	4.31	0	ralt	TRUE	0.818524	2	0.292286	FALSE	12.3472	14.1398	-0.844702	FALSE	FALSE	15	0.0219319	5.51082	4.64068	0.00407705
322	103	82	O	80	75	124	89	4.2	4.14	0	ralt	TRUE	0.886616	2	0.133143	FALSE	8.80147	4.77883	0.244428	FALSE	FALSE	23	0.00335785	8.21825	4.6616	0.011095
323	103	83	I	20	75	124	89	3.97	4.12	1	lalt	TRUE	0.612766	2	0.152857	FALSE	-8.26811	-0.355414	3.82335	FALSE	FALSE	17	0.0918028	3.44532	4.65098	0.00945188
324	103	84	R	20	76	154	68	5.46	4.71	1	lalt	TRUE	0.842949	2	0.254	FALSE	14.6452	0.474733	-16.0359	FALSE	FALSE	24	0.0507862	4.29942	4.64719	0.00125921
325	103	85	D	80	76	154	68	3.77	4.52	0	ralt	TRUE	0.587953	2	0.134	FALSE	6.1091	6.38598	-4.74506	FALSE	FALSE	6	0.0179323	5.80129	4.65432	0.00310742
326	103	86	A	40	3	121	112	3.95	3.78	0	ralt	TRUE	0.55613	2	0.367143	FALSE	12.7663	-5.05728	4.97305	FALSE	FALSE	3	0.021961	5.50891	4.65936	0.00412841
327	103	87	D	80	3	121	112	4.02	4.86	1	lalt	TRUE	1.1393	2	0.242857	FALSE	11.3906	-16.4411	16.6872	FALSE	FALSE	9	0.0955668	3.38735	4.64866	0.00223419
328	103	88	D	80	3	121	112	4.63	4.35	1	lalt	TRUE	0.532424	2	0.0242857	FALSE	-4.29587	-8.34112	11.5901	FALSE	FALSE	9	0.102861	3.28124	4.63733	0.00167431
329	103	89	R	20	76	154	68	3.75	4.79	1	lalt	TRUE	0.292529	2	0.129429	FALSE	-6.13745	-17.2553	-5.9515	FALSE	FALSE	24	0.0567547	4.13912	4.63265	0.0010254
330	103	90	A	40	157	193	131	4.54	4.11	1	lalt	TRUE	0.70169	2	0.194857	FALSE	1.68898	9.35317	-11.6585	FALSE	FALSE	1	0.0718778	3.79831	4.62552	0.00118993
331	103	91	O	80	3	121	112	3.68	4.31	0	ralt	TRUE	0.729829	2	0.365714	FALSE	-6.57951	-34.8795	41.9355	FALSE	FALSE	21	0.0101025	6.62914	4.63766	0.00398045
332	103	92	I	20	76	154	68	5.01	4.69	0	ralt	TRUE	0.789015	2	0.121429	FALSE	3.77676	-7.34554	4.3605	FALSE	FALSE	12	0.00707547	7.14296	4.65245	0.00802604
333	103	93	T	40	157	193	131	4.35	4.32	0	ralt	TRUE	0.667066	2	0.152571	FALSE	-3.12947	-4.91949	-5.58159	FALSE	FALSE	31	0.0125786	6.31288	4.66239	0.00733903
334	103	94	D	80	3	121	112	3.7	3.87	1	lalt	TRUE	1.07115	2	0.381714	FALSE	13.9635	9.91491	3.25037	FALSE	FALSE	9	0.105806	3.24051	4.65119	0.00307566
335	103	95	R	20	76	154	68	4.59	3.65	1	lalt	TRUE	0.401366	2	0.172857	FALSE	8.19366	-5.73361	-4.5522	FALSE	FALSE	24	0.0617889	4.01651	4.64577	0.000869647
336	103	96	O	80	0	168	107	4.55	4.74	1	lalt	TRUE	0.729553	2	0.245143	FALSE	3.3765	2.60898	2.09678	FALSE	FALSE	20	0.0961978	3.37785	4.63586	0.000895612
337	103	97	A	40	157	193	131	3.63	4.66	1	lalt	TRUE	0.430643	2	0.120286	FALSE	-2.86799	2.77456	-0.986342	FALSE	FALSE	1	0.0756136	3.72521	4.62859	0.000769296
338	103	98	A	40	75	124	89	5.3	4.66	0	ralt	TRUE	0.476803	2	0.259714	FALSE	8.43684	-8.17213	9.02706	FALSE	FALSE	5	0.0125317	6.31828	4.63846	0.00304466
339	103	99	A	40	157	193	131	4.56	5.14	1	lalt	TRUE	0.384878	2	0.137714	FALSE	0.652343	18.3397	-12.2193	FALSE	FALSE	1	0.0819008	3.60998	4.63047	0.00297857
340	103	100	O	80	138	154	91	4.96	3.72	0	ralt	TRUE	1.0888	2	0.272286	FALSE	11.6846	-10.3563	-12.1949	FALSE	FALSE	22	0.00901776	6.79302	4.64284	0.00375712
341	103	101	R	20	75	124	89	4.33	4.37	0	ralt	TRUE	0.865007	2	0.138571	FALSE	-4.05014	-25.9785	8.80361	FALSE	FALSE	29	0.020796	5.58755	4.64807	0.00492316
342	103	102	O	80	0	168	107	4.65	3.82	1	lalt	TRUE	1.42009	2	0.378	FALSE	5.76871	-10.5794	23.5154	FALSE	FALSE	20	0.0992617	3.33262	4.63828	0.00185855
343	103	103	R	20	76	154	68	5.34	5.38	1	lalt	TRUE	0.40825	2	0.224857	FALSE	2.7703	-1.13091	2.72394	FALSE	FALSE	24	0.0654269	3.93397	4.63274	0.000765546
344	103	104	T	40	138	154	91	4.14	3.92	1	lalt	TRUE	1.08921	2	0.271143	FALSE	4.6492	-17.8612	12.478	FALSE	FALSE	34	0.0610512	4.03384	4.62795	0.000972953
345	103	105	I	20	75	124	89	4.16	5.08	1	lalt	TRUE	0.589361	2	0.382286	FALSE	5.74132	-5.32385	-6.68993	FALSE	FALSE	17	0.0845711	3.56369	4.62008	0.000842546
346	103	106	I	20	75	124	89	3.74	4.27	1	lalt	TRUE	0.399419	2	0.116571	FALSE	12.2634	18.3745	7.4234	FALSE	FALSE	17	0.0910178	3.45771	4.6116	0.00146229
347	103	107	D	80	75	124	89	4.79	5.34	0	ralt	TRUE	0.68567	2	0.288	FALSE	-3.96794	-22.34	1.56857	FALSE	FALSE	11	0.0147777	6.08044	4.61977	0.00230338
348	103	108	I	20	157	193	131	5.48	3.63	0	ralt	TRUE	0.635692	2	0.215714	FALSE	-3.47163	-1.21888	-15.7338	FALSE	FALSE	13	0.0283019	5.14296	4.62228	0.00304465
349	103	109	A	40	76	154	68	3.83	4.65	0	ralt	TRUE	0.628792	2	0.275714	FALSE	0.294198	-9.63808	-1.01664	FALSE	FALSE	0	0.00390371	8.00094	4.63959	0.00685348
350	103	110	T	40	138	154	91	4.45	3.91	1	ralt	FALSE	0.902964	2	0.795714	TRUE	-13.0316	-18.6997	30.4518	FALSE	FALSE	34	0.0653916	3.93475	4.63433	0.00618858
351	103	111	T	40	76	154	68	4.25	4.07	0	ralt	TRUE	1.04605	2	0.234	FALSE	-5.64585	-11.7366	11.3511	FALSE	FALSE	30	0.0106533	6.55255	4.64472	0.00296476
352	103	112	A	40	157	193	131	4.09	4.9	1	lalt	TRUE	0.8222	2	0.122286	FALSE	-5.29513	-17.151	1.41686	FALSE	FALSE	1	0.0814635	3.6177	4.63747	0.00284639
353	103	113	R	20	76	154	68	4.29	5.5	1	ralt	FALSE	0.748298	2	0.691429	TRUE	-1.21676	-0.61541	10.531	FALSE	FALSE	24	0.0677472	3.88369	4.63202	0.000720292
354	103	114	R	20	3	121	112	3.56	5.39	0	ralt	TRUE	0.513365	2	0.253429	FALSE	7.88362	8.324	1.70526	FALSE	FALSE	27	0.012327	6.34203	4.64116	0.00254423
355	103	115	T	40	138	154	91	4.52	4.8	1	lalt	TRUE	1.07442	2	0.121143	FALSE	9.94214	7.39156	-13.0466	FALSE	FALSE	34	0.0698488	3.83962	4.63548	0.00250937
356	103	116	I	20	76	154	68	4.88	4.68	0	lalt	FALSE	0.972494	2	0.918286	TRUE	8.65111	13.5593	5.77821	FALSE	FALSE	12	0.0125372	6.31764	4.64438	0.00243739
357	103	117	T	40	157	193	131	4.77	3.54	0	ralt	TRUE	1.07352	2	0.220571	FALSE	-0.232481	-10.3868	-5.30403	FALSE	FALSE	31	0.0171414	5.86637	4.65075	0.00358604
358	103	118	O	80	0	168	107	4.83	5.37	1	ralt	FALSE	1.08164	2	0.784571	TRUE	-2.84479	4.71001	-3.83781	FALSE	FALSE	20	0.0954423	3.38923	4.64233	0.00177263
359	103	119	I	20	0	168	107	4.48	4.13	0	ralt	TRUE	0.932673	2	0.515143	TRUE	2.18423	7.06615	-20.3814	FALSE	FALSE	14	0.00584297	7.41908	4.6563	0.00405063
360	103	120	O	80	0	168	107	4.69	5.09	1	lalt	TRUE	0.61999	3	0.532	TRUE	-6.52902	-13.7569	21.0935	FALSE	FALSE	20	0.100629	3.31288	4.64749	0.00400651
361	103	121	I	20	76	154	68	4.57	3.76	0	ralt	TRUE	0.630039	3	0.263714	FALSE	10.222	-7.51598	-3.43695	FALSE	FALSE	12	0.0185074	5.75575	4.65311	0.00158506
362	103	122	A	40	157	193	131	4.93	5.16	1	lalt	TRUE	0.519222	3	0.119429	FALSE	3.52393	-11.3167	0.0806383	FALSE	FALSE	1	0.0826367	3.59707	4.64616	0.0016317
363	103	123	D	80	0	168	107	3.88	5.15	0	ralt	TRUE	1.12519	3	0.942	TRUE	1.65455	5.08343	-7.14867	FALSE	FALSE	8	0.0143586	6.12194	4.65368	0.00195984
364	103	124	T	40	3	121	112	4.66	5.3	0	ralt	TRUE	0.829302	3	0	FALSE	17.1025	17.9407	-8.08514	FALSE	FALSE	33	0.0222877	5.48761	4.65773	0.00276676
365	103	125	O	80	0	168	107	3.83	4.79	1	lalt	TRUE	1.02523	3	0.263714	FALSE	5.23814	-7.68484	-5.66834	FALSE	FALSE	20	0.103715	3.2693	4.64893	0.00129662
366	103	126	T	40	76	154	68	4.22	5.42	0	ralt	TRUE	0.929418	3	0	FALSE	3.102	8.74444	-13.5799	FALSE	FALSE	30	0.0158397	5.98031	4.65558	0.00168651
367	103	127	D	80	0	168	107	4.2	3.53	0	lalt	FALSE	1.29341	3	0.988857	TRUE	-0.553252	-1.64863	10.5318	FALSE	FALSE	8	0.0201412	5.63371	4.66035	0.00263988
368	103	128	T	40	138	154	91	4.46	4.78	1	ralt	FALSE	0.871613	3	0.373714	FALSE	11.5071	-9.07788	10.2393	FALSE	FALSE	34	0.0704096	3.82808	4.65497	0.00147517
369	103	129	I	20	138	154	91	4.88	4.9	0	lalt	FALSE	0.969669	3	0.238857	FALSE	-4.24925	-4.37663	2.75569	FALSE	FALSE	16	0.00983419	6.66798	4.66487	0.00251304
370	103	130	I	20	0	168	107	4.67	3.54	0	ralt	TRUE	1.06664	3	0.311429	FALSE	-0.991333	3.06941	1.43138	FALSE	FALSE	14	0.0114799	6.44475	4.6736	0.00408471
371	103	131	R	20	76	154	68	3.55	4.61	1	lalt	TRUE	0.46987	3	0.118857	FALSE	11.7137	-4.68631	7.72764	FALSE	FALSE	24	0.0664332	3.91195	4.66872	0.00221104
372	103	132	T	40	138	154	91	5.09	3.64	1	lalt	TRUE	1.01502	3	0.480857	TRUE	11.3193	7.7484	-9.86978	FALSE	FALSE	34	0.0746855	3.74303	4.66294	0.000603325
373	103	133	A	40	157	193	131	4.35	4.09	1	lalt	TRUE	0.536143	3	0.362	FALSE	2.87244	-5.94796	9.64764	FALSE	FALSE	1	0.0831752	3.5877	4.65634	0.000523861
374	103	134	R	20	75	124	89	3.92	5.39	0	ralt	TRUE	0.855287	3	0.408857	TRUE	-2.43474	3.90797	-7.86285	FALSE	FALSE	29	0.0226415	5.46489	4.66008	0.00120551
375	103	135	O	80	0	168	107	5.28	4.39	1	lalt	TRUE	0.849363	3	0.201714	FALSE	9.90666	14.5482	-11.1775	FALSE	FALSE	20	0.103498	3.27233	4.65181	0.00114019
376	103	136	O	80	0	168	107	4	5.3	1	lalt	TRUE	0.880384	3	0.138857	FALSE	-7.38251	-2.64243	12.0889	FALSE	FALSE	20	0.10871	3.20144	4.64323	0.000811615
377	103	137	I	20	75	124	89	5.16	4.56	1	lalt	TRUE	0.583462	3	0.260857	FALSE	3.34901	8.0589	-4.72661	FALSE	FALSE	17	0.0804886	3.63507	4.63717	0.00041267
378	103	138	A	40	138	154	91	4.28	5.1	0	ralt	TRUE	0.925504	3	0.096	FALSE	6.78142	0.704445	5.67363	FALSE	FALSE	4	0.0083496	6.90408	4.6478	0.00254063
379	103	139	D	80	3	121	112	4.9	4.2	1	lalt	TRUE	1.17958	3	0.472	TRUE	4.43092	-4.86191	7.117	FALSE	FALSE	9	0.0843127	3.56811	4.64141	0.0025109
380	103	140	I	20	75	124	89	4	4.81	1	lalt	TRUE	1.17857	3	0.347714	FALSE	-6.37108	1.82247	-6.84113	FALSE	FALSE	17	0.0847985	3.55982	4.63506	0.00044454
381	103	141	A	40	75	124	89	5.4	4.03	0	ralt	TRUE	0.657656	3	0.407429	TRUE	1.59803	-12.037	3.66826	FALSE	FALSE	5	0.015137	6.04578	4.64165	0.00152709
382	103	142	R	20	138	154	91	3.92	4.12	0	ralt	TRUE	0.584793	3	0.249143	FALSE	1.33276	0.426266	6.53834	FALSE	FALSE	28	0.00911596	6.77739	4.65152	0.00334398
383	103	143	O	80	157	193	131	4.97	4.56	0	ralt	TRUE	1.47491	3	0.435714	TRUE	8.44025	-1.30722	7.10342	FALSE	FALSE	19	0.00653526	7.25754	4.66329	0.0047169
384	103	144	A	40	157	193	131	5.25	4.96	1	lalt	TRUE	0.655965	3	0.486	TRUE	11.9692	15.3645	-19.5281	FALSE	FALSE	1	0.0836478	3.57953	4.65707	0.00288435
385	103	145	I	20	75	124	89	4.27	5.1	1	lalt	TRUE	0.784971	3	0.13	FALSE	-7.09049	-5.63295	0.712042	FALSE	FALSE	17	0.0879808	3.50667	4.65052	0.00041368
386	103	146	R	20	76	154	68	5.03	4.79	1	lalt	TRUE	0.617029	3	0.462	TRUE	5.8161	-14.2896	10.6835	FALSE	FALSE	24	0.0664524	3.91153	4.64619	0.000473004
387	103	147	T	40	157	193	131	3.99	3.74	0	ralt	TRUE	1.01907	3	0.293429	FALSE	6.97559	18.3947	1.13118	FALSE	FALSE	31	0.0197959	5.65866	4.65072	0.00122415
388	103	148	T	40	138	154	91	5.18	3.66	1	lalt	TRUE	1.11922	3	0.536286	TRUE	-10.2731	-15.7534	-0.958713	FALSE	FALSE	34	0.0736259	3.76364	4.64566	0.00118512
389	103	149	A	40	138	154	91	5.46	3.93	0	ralt	TRUE	0.786347	3	0	FALSE	21.4285	35.5656	-14.0601	FALSE	FALSE	4	0.0132585	6.23693	4.65284	0.00159707
390	103	150	I	20	75	124	89	5.01	3.54	1	lalt	TRUE	1.06638	3	0.153429	FALSE	2.83803	-8.58623	-12.5216	FALSE	FALSE	17	0.0909921	3.45812	4.64625	0.00153456
391	103	151	T	40	138	154	91	5.01	5.34	1	lalt	TRUE	0.879487	3	0.213143	FALSE	2.5268	12.1067	-3.1947	FALSE	FALSE	34	0.0777924	3.68423	4.64089	0.000398066
392	103	152	I	20	76	154	68	4.53	4.16	0	lalt	FALSE	1.59644	3	0.495429	TRUE	0.00637577	9.40056	-3.74884	FALSE	FALSE	12	0.0207748	5.58902	4.64503	0.00107828
393	103	153	A	40	138	154	91	5.45	5.26	0	lalt	FALSE	1.30351	3	0.132	FALSE	8.63568	3.78607	2.54904	FALSE	FALSE	4	0.0182689	5.77446	4.64998	0.00182437
394	103	154	D	80	3	121	112	4.34	3.74	1	lalt	TRUE	1.02546	3	0.688571	TRUE	-1.93424	-10.255	7.70197	FALSE	FALSE	9	0.0829196	3.59214	4.64423	0.00115641
395	103	155	D	80	157	193	131	4.15	5.35	0	ralt	TRUE	0.563633	3	0.366286	FALSE	-4.58483	-19.2466	-17.0069	FALSE	FALSE	7	0.00612467	7.35115	4.65579	0.00271332
396	103	156	T	40	75	124	89	5.05	4.67	0	lalt	FALSE	1.17265	3	0.134857	FALSE	5.07713	-2.94995	13.586	FALSE	FALSE	35	0.00904088	6.78932	4.66504	0.00429617
397	103	157	R	20	3	121	112	3.84	4.71	0	missing	FALSE		3	0.396286	FALSE	-8.53158	-1.02338	23.6257	TRUE	TRUE	27	0.014762	6.08197	4.67118	0.00291686
398	103	158	I	20	75	124	89	5.17	4.8	1	lalt	TRUE	0.912691	3	0.484286	TRUE	0.609915	-1.72812	-1.91554	FALSE	FALSE	17	0.0923945	3.43605	4.66467	0.00129483
399	103	159	R	20	76	154	68	5.07	4.36	1	lalt	TRUE	0.543741	3	0.486286	TRUE	-6.44842	-4.43707	-17.9471	FALSE	FALSE	24	0.0671505	3.89646	4.66049	0.000400156
400	103	160	R	20	138	154	91	4.04	4.13	0	ralt	TRUE	0.474834	3	0.437714	TRUE	-1.02097	6.60071	7.44523	FALSE	FALSE	28	0.0133808	6.22369	4.6672	0.00144429
401	103	161	O	80	0	168	107	4.04	3.9	1	lalt	TRUE	0.528999	3	0.579714	TRUE	-3.96027	-1.11836	-8.82331	FALSE	FALSE	20	0.0999904	3.32207	4.66024	0.00134787
402	103	162	A	40	76	154	68	3.9	4.69	0	ralt	TRUE	0.412205	3	0.364	FALSE	2.07199	-11.1426	-8.92663	FALSE	FALSE	0	0.00790928	6.98224	4.66999	0.00204437
403	103	163	R	20	76	154	68	3.74	3.69	1	lalt	TRUE	0.498362	3	0.230857	FALSE	7.48077	7.99391	22.9206	FALSE	FALSE	24	0.0708258	3.81958	4.66551	0.00210449
404	103	164	O	80	138	154	91	3.63	3.84	0	ralt	TRUE	0.597582	3	0.136571	FALSE	8.37961	-4.58769	-2.18202	FALSE	FALSE	22	0.0111321	6.48913	4.67318	0.00159041
405	103	165	T	40	138	154	91	4.25	3.52	1	lalt	TRUE	0.724793	3	0.136286	FALSE	7.79613	20.7169	-22.9209	FALSE	FALSE	34	0.0773491	3.69247	4.66812	0.00156023
406	103	166	I	20	0	168	107	3.69	4.02	0	ralt	TRUE	1.05496	3	0.514571	TRUE	11.8748	11.676	2.64727	FALSE	FALSE	14	0.0143845	6.11935	4.67419	0.00125605
407	103	167	I	20	75	124	89	4.19	4.75	1	lalt	TRUE	0.948146	3	0.136857	FALSE	3.18897	8.34955	-6.8362	FALSE	FALSE	17	0.0932243	3.42315	4.66789	0.00121116
408	103	168	A	40	157	193	131	3.85	4.86	1	lalt	TRUE	0.802248	3	0.422	TRUE	-12.7924	-20.1891	2.93934	FALSE	FALSE	1	0.0787088	3.66733	4.66281	0.000328372
409	103	169	T	40	75	124	89	4.38	3.88	0	ralt	TRUE	1.04434	3	0.78	TRUE	7.10225	9.14536	13.8592	FALSE	FALSE	35	0.0133456	6.22749	4.66927	0.0012927
410	103	170	O	80	157	193	131	5.5	3.54	0	ralt	TRUE	0.663489	3	0.279143	FALSE	-5.57736	-10.1406	-5.10517	FALSE	FALSE	19	0.0105331	6.56893	4.67706	0.0024782
411	103	171	T	40	138	154	91	4.63	5.44	1	ralt	FALSE	0.873647	3	0.7	TRUE	6.90504	12.5724	2.51746	FALSE	FALSE	34	0.079938	3.64497	4.67191	0.00153569
412	103	172	R	20	157	193	131	3.94	4.96	0	ralt	TRUE	0.477646	3	0.130286	FALSE	3.4375	-2.68997	5.3403	FALSE	FALSE	25	0.00807329	6.95263	4.6811	0.0018756
413	103	173	R	20	3	121	112	5.09	3.56	0	ralt	TRUE	0.669739	3	0.0442857	FALSE	11.078	13.3505	-13.2898	FALSE	FALSE	27	0.0184165	5.76285	4.68545	0.00248729
414	103	174	T	40	138	154	91	3.67	5.27	1	lalt	TRUE	0.863887	3	0.255429	FALSE	1.3672	-3.06478	8.29358	FALSE	FALSE	34	0.083558	3.58108	4.68004	0.000945946
415	103	175	R	20	76	154	68	4	3.71	1	lalt	TRUE	0.541974	3	0.275714	FALSE	9.04728	-6.72281	1.77998	FALSE	FALSE	24	0.0715372	3.80516	4.67571	0.000346324
416	103	176	O	80	3	121	112	4.87	4.83	0	ralt	TRUE	1.78411	3	0.549429	TRUE	-0.128714	-0.412651	13.7215	FALSE	FALSE	21	0.010769	6.53698	4.68316	0.00146012
417	103	177	O	80	75	124	89	3.91	5.15	0	ralt	TRUE	0.546224	3	0.241714	FALSE	7.629	18.4576	2.32058	FALSE	FALSE	23	0.00655505	7.25318	4.6932	0.0032188
418	103	178	T	40	138	154	91	4.67	3.92	1	lalt	TRUE	0.928237	3	0.136857	FALSE	10.0208	5.8743	-13.6949	FALSE	FALSE	34	0.086669	3.52834	4.68762	0.00208943
419	103	179	R	20	76	154	68	3.82	3.62	1	lalt	TRUE	0.494387	3	0.285143	FALSE	-3.54773	-18.5424	-24.9047	FALSE	FALSE	24	0.0748574	3.73971	4.68304	0.000318009
420	103	180	R	20	0	168	107	5.47	4.19	0	ralt	TRUE	0.421273	4	0.114571	FALSE	12.2767	9.85639	0.207638	FALSE	FALSE	26	0.0088225	6.8246	4.69143	0.00164128
421	103	181	D	80	75	124	89	3.54	4.98	0	lalt	FALSE	1.39028	4	0.639143	TRUE	-0.870678	17.3718	-4.98871	FALSE	FALSE	11	0.0143466	6.12315	4.69705	0.00239701
422	103	182	D	80	3	121	112	3.59	4.36	1	lalt	TRUE	2.22431	4	0.188571	FALSE	7.35418	0.336444	5.75057	FALSE	FALSE	9	0.0768565	3.70169	4.69232	0.0010923
423	103	183	D	80	3	121	112	4.5	5.39	1	lalt	TRUE	0.991445	4	0.63	TRUE	5.03926	-0.284197	-0.838033	FALSE	FALSE	9	0.0810718	3.62466	4.6873	0.000693398
424	103	184	O	80	3	121	112	5.08	3.84	0	ralt	TRUE	0.866485	4	0.128857	FALSE	3.03997	-0.286584	-11.3892	FALSE	FALSE	21	0.0149228	6.06634	4.69265	0.00102735
425	103	185	A	40	76	154	68	5.33	5.08	0	ralt	TRUE	0.381604	4	0	FALSE	7.47966	16.6001	-8.82152	FALSE	FALSE	0	0.011611	6.42836	4.69936	0.00197119
426	103	186	O	80	75	124	89	4.84	5.07	0	ralt	TRUE	0.807594	4	0.404286	TRUE	5.60969	1.2437	8.17532	FALSE	FALSE	23	0.0107938	6.53365	4.7064	0.00225807
427	103	187	O	80	157	193	131	3.79	3.63	0	ralt	TRUE	0.657636	4	0.130286	FALSE	4.89059	3.13254	-10.7232	FALSE	FALSE	19	0.0142144	6.1365	4.71188	0.00205375
428	103	188	T	40	138	154	91	3.56	4.24	1	lalt	TRUE	0.644828	4	0.374286	FALSE	3.3437	6.53351	14.5452	FALSE	FALSE	34	0.0872642	3.51847	4.70643	0.00102315
429	103	189	R	20	76	154	68	3.8	4.49	1	lalt	TRUE	0.581049	4	0	FALSE	0.246829	-8.55543	14.1707	FALSE	FALSE	24	0.0759748	3.71833	4.70189	0.000286923
430	103	190	I	20	0	168	107	4.71	4.72	0	ralt	TRUE	0.582255	4	0.212286	FALSE	3.77577	-4.22867	-10.3615	FALSE	FALSE	14	0.0172817	5.85461	4.70623	0.000877952
431	103	191	R	20	157	193	131	4.4	4.02	0	ralt	TRUE	0.784284	4	0.0437143	FALSE	6.56904	6.64708	-0.396746	FALSE	FALSE	25	0.0118028	6.40472	4.71263	0.00174921
432	103	192	I	20	138	154	91	5.11	4.27	0	lalt	FALSE	1.29844	4	0.188286	FALSE	-1.1491	10.4767	-4.27635	FALSE	FALSE	16	0.0115028	6.44187	4.71913	0.00206867
433	103	193	T	40	138	154	91	4.96	3.86	1	ralt	FALSE	2.44231	4	0.356	FALSE	6.17548	26.344	3.24214	FALSE	FALSE	34	0.0897256	3.47834	4.7136	0.0011629
434	103	194	T	40	0	168	107	3.56	4.99	0	ralt	TRUE	1.85336	4	0.553714	TRUE	-2.44855	1.26991	7.17948	FALSE	FALSE	32	0.0128794	6.27879	4.71943	0.00104743
435	103	195	O	80	0	168	107	3.78	3.51	1	lalt	TRUE	0.895389	4	0	FALSE	11.2398	0.474457	-5.00736	FALSE	FALSE	20	0.0896022	3.48032	4.71396	0.00104208
436	103	196	D	80	138	154	91	3.73	4.72	0	ralt	TRUE	1.63961	4	0.105714	FALSE	5.37354	5.69149	-10.0492	FALSE	FALSE	10	0.0151269	6.04674	4.71888	0.000902365
437	103	197	A	40	0	168	107	4.92	3.58	0	ralt	TRUE	1.23872	4	0	FALSE	0.532222	-1.4688	-1.6039	FALSE	FALSE	2	0.0153049	6.02986	4.7237	0.00154552
438	103	198	A	40	3	121	112	3.86	4.03	0	ralt	TRUE	0.651871	4	0.121714	FALSE	0.384814	-6.7172	-1.73823	FALSE	FALSE	3	0.0157233	5.99095	4.72834	0.00150501
439	103	199	R	20	0	168	107	5.46	3.96	0	ralt	TRUE	1.76899	4	0.0408571	FALSE	4.00507	-5.23224	4.31241	FALSE	FALSE	26	0.0123645	6.33765	4.73423	0.00166073
440	103	200	A	40	75	124	89	5.49	4.99	0	ralt	TRUE	0.771038	4	0.134	FALSE	7.74639	10.887	-1.83922	FALSE	FALSE	5	0.01559	6.00323	4.73883	0.00165394
441	103	201	I	20	3	121	112	4.04	4.91	0	ralt	TRUE	0.547009	4	0.131143	FALSE	5.84835	6.70646	-3.294	FALSE	FALSE	15	0.0150466	6.05442	4.74359	0.00148669
442	103	202	T	40	76	154	68	4.43	3.59	0	ralt	TRUE	1.08104	4	0.255143	FALSE	-0.926912	-0.446936	9.10353	FALSE	FALSE	30	0.0149834	6.0605	4.74834	0.00150275
443	103	203	R	20	157	193	131	5.49	3.52	0	ralt	TRUE	0.543302	4	0.172	FALSE	-10.5927	-10.8824	0.461978	FALSE	FALSE	25	0.0153943	6.02146	4.7529	0.00147473
444	103	204	R	20	76	154	68	4.55	5.47	1	lalt	TRUE	0.636398	4	0.250571	FALSE	1.77161	-8.94209	3.32056	FALSE	FALSE	24	0.0753931	3.72942	4.74851	0.000860946
445	103	205	O	80	75	124	89	5.46	4.07	0	ralt	TRUE	0.548438	4	0.295143	FALSE	6.41294	5.91602	-22.6082	FALSE	FALSE	23	0.0140922	6.14896	4.7535	0.000914576
446	103	206	I	20	75	124	89	4.59	5.46	1	lalt	TRUE	0.819433	4	0.354286	FALSE	-0.100927	1.63035	17.6886	FALSE	FALSE	17	0.0823328	3.60239	4.74863	0.000896456
447	103	207	D	80	3	121	112	5.22	4.02	1	lalt	TRUE	0.999473	4	0.118857	FALSE	2.19501	-10.5884	6.18648	FALSE	FALSE	9	0.0771799	3.69563	4.74417	0.000252127
448	103	208	D	80	3	121	112	4.39	4.83	1	lalt	TRUE	0.45656	4	0.493714	TRUE	-8.5412	-15.4455	11.0012	FALSE	FALSE	9	0.080962	3.62661	4.73948	0.000558419
449	103	209	R	20	76	154	68	4.33	4.24	1	lalt	TRUE	0.535654	4	0	FALSE	10.2646	11.0087	0.302503	FALSE	FALSE	24	0.0779361	3.68156	4.73504	0.00024901
450	103	210	D	80	76	154	68	3.84	3.71	0	ralt	TRUE	1.32274	4	0.324571	FALSE	-1.52763	-27.6335	1.38172	FALSE	FALSE	6	0.0128854	6.27812	4.74046	0.000940123
451	103	211	A	40	76	154	68	4.91	3.51	0	ralt	TRUE	0.369991	4	0.253714	FALSE	4.88067	8.42342	4.32252	FALSE	FALSE	0	0.0144374	6.11405	4.74526	0.00153537
452	103	212	D	80	3	121	112	3.83	3.79	1	lalt	TRUE	0.449166	4	0.123143	FALSE	7.39697	7.01814	2.03164	FALSE	FALSE	9	0.0836884	3.57883	4.74045	0.000836182
453	103	213	D	80	3	121	112	4.07	4.09	1	lalt	TRUE	0.774371	4	0.184571	FALSE	5.55333	12.2071	-14.8593	FALSE	FALSE	9	0.0873683	3.51675	4.73544	0.000492631
454	103	214	A	40	157	193	131	3.5	3.55	1	lalt	TRUE	0.839527	4	0.299429	FALSE	0.93994	0.87388	-0.874502	FALSE	FALSE	1	0.0682264	3.87353	4.73185	0.000249374
455	103	215	A	40	157	193	131	4.22	4.74	1	lalt	TRUE	0.350712	4	0.0997143	FALSE	-2.99549	-12.1286	-4.98036	FALSE	FALSE	1	0.0719387	3.79709	4.728	0.000600814
456	103	216	D	80	3	121	112	5.13	4.08	1	lalt	TRUE	0.460894	4	0.511429	TRUE	-14.9115	-20.9464	6.58079	FALSE	FALSE	9	0.0902965	3.46919	4.72291	0.000233253
457	103	217	O	80	138	154	91	3.81	4.84	0	ralt	TRUE	0.795988	4	0.117429	FALSE	5.3871	9.42137	8.66122	FALSE	FALSE	22	0.0127526	6.29306	4.7283	0.000879254
458	103	218	R	20	76	154	68	4.33	4.82	1	lalt	TRUE	0.728111	4	0.118286	FALSE	-6.09156	-8.37227	15.8976	FALSE	FALSE	24	0.0791116	3.65997	4.72398	0.000891945
459	103	219	A	40	157	193	131	4.41	4.53	1	lalt	TRUE	0.667196	4	0.127714	FALSE	11.769	2.60586	-14.2213	FALSE	FALSE	1	0.0747318	3.74213	4.72001	0.000239041
460	103	220	O	80	76	154	68	4.76	3.52	0	ralt	TRUE	0.625218	4	0.546	TRUE	9.01906	12.0832	4.12979	FALSE	FALSE	18	0.00479068	7.70555	4.7298	0.00193991
461	103	221	O	80	0	168	107	4.61	4.5	1	lalt	TRUE	0.523411	4	0.251429	FALSE	-2.03468	-13.695	-5.16616	FALSE	FALSE	20	0.0844285	3.56613	4.72518	0.00191526
462	103	222	D	80	157	193	131	4.37	5.29	0	ralt	TRUE	0.577581	4	0.136857	FALSE	11.1814	-2.93685	6.34202	FALSE	FALSE	7	0.00841012	6.89366	4.73244	0.00120537
463	103	223	O	80	0	168	107	5.31	3.65	1	lalt	TRUE	0.530634	4	0.358286	FALSE	-7.98186	-6.91785	9.41937	FALSE	FALSE	20	0.0876375	3.51231	4.72764	0.00119543
464	103	224	R	20	0	168	107	4.65	4.43	0	ralt	TRUE	1.07364	4	0.278857	FALSE	-4.25351	-20.3769	11.382	FALSE	FALSE	26	0.0150218	6.0568	4.73208	0.000731395
465	103	225	T	40	75	124	89	3.63	4.01	0	ralt	TRUE	0.514876	4	0.578571	TRUE	13.0941	17.5884	-18.5608	FALSE	FALSE	35	0.0143136	6.12647	4.73674	0.00128803
466	103	226	O	80	76	154	68	4.63	4.1	0	ralt	TRUE	0.760037	4	0	FALSE	5.3234	19.4465	-13.3755	FALSE	FALSE	18	0.00849777	6.8787	4.74381	0.00171459
467	103	227	I	20	138	154	91	5.11	5.43	0	lalt	FALSE	1.67508	4	0.112	FALSE	10.2153	17.7158	-15.2171	FALSE	FALSE	16	0.0137743	6.18188	4.74858	0.00172766
468	103	228	R	20	76	154	68	3.54	5.31	1	lalt	TRUE	1.72097	4	0.604286	TRUE	5.24075	-2.15489	6.57926	FALSE	FALSE	24	0.0799028	3.64561	4.7443	0.000776224
469	103	229	A	40	157	193	131	5.48	3.58	1	lalt	TRUE	0.592102	4	0.417429	TRUE	-4.74952	-25.445	-11.0281	FALSE	FALSE	1	0.0756853	3.72384	4.74034	0.000218604
470	103	230	R	20	138	154	91	3.85	3.83	0	ralt	TRUE	0.384278	4	0.314571	FALSE	6.85992	10.8708	6.64264	FALSE	FALSE	28	0.013619	6.19824	4.74512	0.000777138
471	103	231	D	80	157	193	131	4.64	4.85	0	ralt	TRUE	0.641403	4	0.123714	FALSE	2.66025	1.64767	15.0857	FALSE	FALSE	7	0.011872	6.3963	4.75052	0.00141408
472	103	232	O	80	76	154	68	3.94	5.43	0	ralt	TRUE	0.686481	4	0.126857	FALSE	12.2806	-6.70491	-1.6327	FALSE	FALSE	18	0.0120389	6.37616	4.75582	0.00148529
473	103	233	T	40	138	154	91	3.67	4.14	1	lalt	TRUE	1.18552	4	0.116	FALSE	9.96981	12.5047	4.81227	FALSE	FALSE	34	0.080101	3.64204	4.75158	0.000836057
474	103	234	D	80	3	121	112	4.43	3.56	1	lalt	TRUE	1.12862	4	0.266571	FALSE	-9.3756	-15.9195	-5.89319	FALSE	FALSE	9	0.0879804	3.50667	4.74689	0.000192696
475	103	235	T	40	0	168	107	4.24	3.99	0	ralt	TRUE	1.18178	4	0.133714	FALSE	6.70682	-2.29026	-4.95169	FALSE	FALSE	32	0.0146209	6.09582	4.75124	0.000690108
476	103	236	A	40	157	193	131	3.93	5.03	1	lalt	TRUE	0.435996	4	0.386857	FALSE	2.27362	-8.50116	11.2947	FALSE	FALSE	1	0.077414	3.69126	4.74724	0.000701565
477	103	237	O	80	0	168	107	4.57	4.44	1	ralt	FALSE	1.56302	4	0.782571	TRUE	0.179405	-2.01305	8.33797	FALSE	FALSE	20	0.0868063	3.52606	4.74269	0.000194034
478	103	238	I	20	75	124	89	5.14	5.12	1	lalt	TRUE	0.542138	4	0.118	FALSE	-3.09583	-3.54176	5.15088	FALSE	FALSE	17	0.0763669	3.71091	4.73882	0.000194231
479	103	239	A	40	157	193	131	4.8	4.94	1	lalt	TRUE	0.676163	4	0.36	FALSE	0.864008	-10.4429	2.12804	FALSE	FALSE	1	0.0802058	3.64015	4.73473	0.000201642
480	104	0	D	20	75	124	89	5.49	5.14	1	lalt	FALSE	0.449272	1	0.103143	FALSE	13.8132	-7.40546	0.763168	FALSE	FALSE	11	0.0550315	4.1836	4.49811	0.00797116
481	104	1	T	40	76	154	68	5.32	4.86	0	lalt	TRUE	0.736248	1	0	FALSE	16.8023	9.47072	-6.21455	FALSE	FALSE	30	0.0122387	6.35241	4.52108	0.0325471
482	104	2	T	40	0	168	107	4.51	5.39	1	lalt	FALSE	1.10222	1	0	FALSE	19.4801	22.4747	-18.0725	FALSE	FALSE	32	0.0789474	3.66297	4.49398	0.0292705
483	104	3	A	20	75	124	89	5.31	3.88	0	ralt	FALSE	0.428236	1	0.155429	FALSE	20.1466	-29.666	18.4565	FALSE	FALSE	5	0.0217707	5.52147	4.50429	0.0194088
484	104	4	T	40	75	124	89	3.6	4.7	0	ralt	FALSE	1.23428	1	0	FALSE	17.2112	33.0048	-20.2648	FALSE	FALSE	35	0.0113208	6.46489	4.52814	0.0380851
485	104	5	D	20	3	121	112	4.85	3.74	0	lalt	TRUE	1.70036	1	0	FALSE	26.7418	43.9073	-20.8016	FALSE	FALSE	9	0.0220893	5.50051	4.53736	0.0364834
486	104	6	D	20	76	154	68	5.42	4.1	0	ralt	FALSE	1.90339	1	0.106857	FALSE	6.71656	2.39338	2.45388	FALSE	FALSE	6	0.0215633	5.53528	4.54695	0.0264151
487	104	7	D	20	76	154	68	3.96	5.41	0	ralt	FALSE	1.33737	1	0	FALSE	9.39644	33.288	-13.9963	FALSE	FALSE	6	0.0443177	4.49597	4.53877	0.0439497
488	104	8	A	20	0	168	107	4.76	3.64	0	lalt	TRUE	1.81529	1	0	FALSE	6.49522	9.17991	-1.66005	FALSE	FALSE	2	0.0167238	5.90195	4.55372	0.0214688
489	104	9	R	80	3	121	112	3.52	4.88	1	lalt	FALSE	1.24143	1	0.102571	FALSE	9.26621	4.08656	-3.87996	FALSE	FALSE	27	0.108176	3.20855	4.52181	0.0169766
490	104	10	T	40	157	193	131	4.35	4.75	0	ralt	FALSE	1.78748	1	0	FALSE	20.3957	13.764	-22.6366	FALSE	FALSE	31	0.0135357	6.20709	4.54098	0.0186247
491	104	11	R	80	3	121	112	4.65	4.49	1	ralt	TRUE	1.29752	1	0	FALSE	7.53057	-6.83727	15.454	FALSE	FALSE	27	0.124849	3.00174	4.5068	0.0177966
492	104	12	D	20	75	124	89	4.05	4.54	1	lalt	FALSE	0.796576	1	0	FALSE	11.0615	10.5327	-9.17649	FALSE	FALSE	11	0.0621069	4.0091	4.49249	0.00560518
493	104	13	T	40	138	154	91	4.03	4.61	0	lalt	TRUE	1.44866	1	0	FALSE	24.4453	22.054	-11.5932	FALSE	FALSE	34	0.012707	6.29824	4.5129	0.0191799
494	104	14	A	20	76	154	68	3.75	5.21	1	ralt	TRUE	1.6197	1	0	FALSE	8.20127	0.817133	1.48814	FALSE	FALSE	0	0.0339623	4.87992	4.51333	0.0215917
495	104	15	T	40	76	154	68	4.56	4.93	0	ralt	FALSE	1.16975	1	0	FALSE	4.90711	0.523434	5.53798	FALSE	FALSE	30	0.0284869	5.13356	4.51763	0.0137184
496	104	16	R	80	157	193	131	3.94	4.37	0	ralt	FALSE	1.70273	1	0.124	FALSE	7.41672	2.47825	-0.921147	FALSE	FALSE	25	0.00217707	8.8434	4.55746	0.0487373
497	104	17	D	20	75	124	89	4.42	3.87	1	lalt	FALSE	2.0567	1	0	FALSE	11.4602	6.41248	-16.6269	FALSE	FALSE	11	0.0751157	3.73474	4.53937	0.0433555
498	104	18	R	80	0	168	107	4.87	4.03	0	ralt	FALSE	1.82879	1	0.110286	FALSE	13.7642	24.2525	6.10611	FALSE	FALSE	26	0.00209643	8.89785	4.57835	0.0425858
499	104	19	D	20	138	154	91	5.5	3.52	0	lalt	TRUE	1.63084	1	0	FALSE	-12.0143	-5.32986	1.98292	FALSE	FALSE	10	0.0174957	5.83685	4.59079	0.0491083
500	104	20	T	40	75	124	89	4.89	4.38	0	ralt	FALSE	1.52688	1	0.0911429	FALSE	-3.98003	-6.67727	12.0623	FALSE	FALSE	35	0.0259434	5.26849	4.5957	0.0163741
501	104	21	R	80	76	154	68	4.24	4.88	0	ralt	FALSE	1.2259	1	0	FALSE	3.29309	-4.39908	-3.99987	FALSE	FALSE	24	0.00496525	7.65392	4.62529	0.0295641
502	104	22	O	40	138	154	91	3.59	4.66	0	lalt	TRUE	1.25887	1	0.100286	FALSE	3.59399	6.66072	-2.36292	FALSE	FALSE	22	0.00878334	6.83101	4.64724	0.0377564
503	104	23	I	80	138	154	91	4.57	4	1	ralt	TRUE	1.63996	1	0	FALSE	7.17277	-0.0707459	-0.386828	FALSE	FALSE	16	0.0805884	3.63328	4.62818	0.0169256
504	104	24	A	20	76	154	68	5.21	3.66	1	ralt	TRUE	1.76307	1	0.129143	FALSE	11.5522	3.03228	-6.49967	FALSE	FALSE	0	0.0449686	4.47494	4.62194	0.00545997
505	104	25	A	20	76	154	68	5.45	4.23	1	ralt	TRUE	1.6801	1	0	FALSE	9.75412	8.57633	-5.69717	FALSE	FALSE	0	0.0606248	4.04395	4.60991	0.013325
506	104	26	T	40	157	193	131	5.08	4.23	0	lalt	TRUE	1.59207	1	0	FALSE	8.43697	2.16063	-0.16997	FALSE	FALSE	31	0.0261716	5.25585	4.61441	0.00804254
507	104	27	I	80	138	154	91	3.73	4.24	1	ralt	TRUE	1.40506	1	0.106286	FALSE	-4.59588	-0.735826	4.82018	FALSE	FALSE	16	0.0913447	3.45253	4.59458	0.00697751
508	104	28	A	20	0	168	107	4.71	4.11	0	missing	FALSE		1	0.175714	FALSE	4.63383	-10.3441	2.26986	TRUE	TRUE	2	0.0271226	5.20436	4.5987	0.0065586
509	104	29	T	40	157	193	131	4.89	4.84	0	lalt	TRUE	2.33007	1	0.100571	FALSE	-0.604669	-5.41416	9.50421	FALSE	FALSE	31	0.0403483	4.63135	4.59565	0.00839217
510	104	30	O	40	75	124	89	5.14	4.2	0	ralt	FALSE	1.62902	1	0	FALSE	-2.90237	4.95312	-3.95135	FALSE	FALSE	23	0.0137221	6.18735	4.61057	0.0120022
511	104	31	I	80	3	121	112	5.49	3.85	0	ralt	FALSE	1.97198	1	0	FALSE	-11.85	-10.2596	10.9611	FALSE	FALSE	15	0.00422416	7.88712	4.63899	0.0281513
512	104	32	A	20	76	154	68	4.76	3.73	1	ralt	TRUE	1.30303	1	0	FALSE	4.00488	1.08426	-4.21804	FALSE	FALSE	0	0.0690899	3.85538	4.6257	0.0211022
513	104	33	O	40	157	193	131	3.75	3.76	1	ralt	TRUE	1.26206	1	0	FALSE	8.19237	3.83225	-6.36719	FALSE	FALSE	19	0.0410172	4.60763	4.62232	0.00472717
514	104	34	A	20	3	121	112	4.61	4.5	0	lalt	TRUE	1.28624	1	0.111429	FALSE	2.78294	-6.78831	11.4969	FALSE	FALSE	3	0.006469	7.27224	4.64569	0.01674
515	104	35	R	80	3	121	112	4.04	4.82	1	lalt	FALSE	1.86624	1	0.108	FALSE	-5.60498	-6.1289	2.50192	FALSE	FALSE	27	0.0967313	3.36987	4.62672	0.0147243
516	104	36	A	20	76	154	68	5.35	4.91	1	lalt	FALSE	2.4802	1	0	FALSE	2.6652	11.9445	2.029	FALSE	FALSE	0	0.0791405	3.65944	4.61196	0.00246287
517	104	37	O	40	157	193	131	4.87	5.3	1	ralt	TRUE	1.99601	1	0.126571	FALSE	5.59888	-1.82003	3.94093	FALSE	FALSE	19	0.0524683	4.25241	4.60489	0.00343059
518	104	38	A	20	76	154	68	3.64	3.95	1	ralt	TRUE	1.27605	1	0	FALSE	0.376552	1.60435	-7.27487	FALSE	FALSE	0	0.090515	3.4657	4.58846	0.00316437
519	104	39	D	20	0	168	107	4.59	4.87	0	lalt	TRUE	1.13918	1	0	FALSE	4.81416	16.1755	-20.1575	FALSE	FALSE	8	0.00981132	6.67134	4.60669	0.0101397
520	104	40	O	40	138	154	91	5.49	3.67	0	lalt	TRUE	2.18714	1	0.138286	FALSE	-6.31436	-7.41279	3.65172	FALSE	FALSE	22	0.019861	5.65392	4.61525	0.0138447
521	104	41	I	80	138	154	91	4.91	5.22	1	missing	FALSE		1	0	FALSE	5.11739	9.80712	8.64645	TRUE	TRUE	16	0.0877236	3.51089	4.59991	0.00592119
522	104	42	A	20	76	154	68	5.43	3.9	1	ralt	TRUE	1.08706	1	0	FALSE	14.6196	22.1809	-6.58992	FALSE	FALSE	0	0.0986938	3.3409	4.58295	0.00195721
523	104	43	T	40	0	168	107	3.75	4.58	1	lalt	FALSE	1.45305	1	0.114857	FALSE	15.6614	17.3041	-10.9087	FALSE	FALSE	32	0.0506329	4.30378	4.57749	0.00275196
524	104	44	I	80	76	154	68	4.68	3.51	0	lalt	TRUE	2.2311	1	0.104571	FALSE	8.34377	-1.18755	0.619127	FALSE	FALSE	12	0.00283019	8.46489	4.6065	0.0207074
525	104	45	T	40	0	168	107	5.2	4.44	1	lalt	FALSE	1.14419	1	0	FALSE	7.07954	-10.2883	-8.42668	FALSE	FALSE	32	0.0617284	4.01792	4.59778	0.020077
526	104	46	I	80	138	154	91	5.25	4.93	1	ralt	TRUE	1.06721	1	0	FALSE	8.7101	-12.1496	-2.56787	FALSE	FALSE	16	0.0945697	3.40248	4.5824	0.00228241
527	104	47	A	20	157	193	131	4.05	5.17	0	lalt	TRUE	1.54009	1	0.130571	FALSE	-1.23693	8.87338	9.95754	FALSE	FALSE	1	0.0143214	6.12568	4.59511	0.00641945
528	104	48	R	80	3	121	112	3.74	3.79	1	ralt	TRUE	1.15318	1	0.153429	FALSE	2.6394	-2.69308	6.35716	FALSE	FALSE	27	0.0936658	3.41633	4.5803	0.00633431
529	104	49	A	20	75	124	89	3.62	5	0	lalt	TRUE	1.08435	1	0	FALSE	13.8935	19.1787	-11.9916	FALSE	FALSE	5	0.0217536	5.5226	4.58747	0.00451388
530	104	50	R	80	0	168	107	4.86	3.66	0	lalt	TRUE	1.86238	1	0	FALSE	5.20194	-6.75221	-1.66999	FALSE	FALSE	26	0.0129443	6.27154	4.60105	0.00933307
531	104	51	D	20	75	124	89	5.06	4.95	1	lalt	FALSE	1.52143	1	0.0354286	FALSE	19.3111	3.82292	-9.45255	FALSE	FALSE	11	0.0572544	4.12647	4.5942	0.00697856
532	104	52	D	20	75	124	89	3.5	5.16	1	ralt	TRUE	0.847438	1	0.132857	FALSE	-6.24211	-9.36222	7.04974	FALSE	FALSE	11	0.0679674	3.87901	4.58497	0.0054092
533	104	53	I	80	76	154	68	5.24	5.05	0	lalt	TRUE	1.10653	1	0	FALSE	2.75088	9.10324	-0.955295	FALSE	FALSE	12	0.0137799	6.18129	4.59755	0.00616095
534	104	54	R	80	76	154	68	3.53	5.25	0	missing	FALSE		1	0.118286	FALSE	-0.329962	-1.52361	22.2798	TRUE	TRUE	24	0.0142558	6.13231	4.6095	0.00984464
535	104	55	O	40	3	121	112	3.99	3.89	0	lalt	TRUE	1.09537	1	0	FALSE	12.6772	-6.5328	10.7499	FALSE	FALSE	21	0.00435414	7.8434	4.63284	0.0165002
536	104	56	A	20	3	121	112	3.87	3.89	0	lalt	TRUE	1.37953	1	0	FALSE	-1.56682	17.0699	-9.93967	FALSE	FALSE	3	0.0157916	5.9847	4.64304	0.0158449
537	104	57	O	40	76	154	68	5.22	3.86	0	lalt	TRUE	2.07364	1	0.169143	FALSE	-4.10425	-21.8586	1.51896	FALSE	FALSE	18	0.00791235	6.98168	4.66049	0.0115536
538	104	58	A	20	157	193	131	3.64	3.74	0	ralt	FALSE	1.36569	1	0.106571	FALSE	13.9636	17.3734	-28.6872	FALSE	FALSE	1	0.0232838	5.42453	4.66557	0.0101494
539	104	59	D	20	75	124	89	5.05	5.09	1	ralt	TRUE	1.75882	1	0	FALSE	-12.3811	-14.4033	-14.8643	FALSE	FALSE	11	0.0734856	3.76639	4.65526	0.00371535
540	104	60	O	40	157	193	131	4.76	4.08	1	ralt	TRUE	2.3029	2	0	FALSE	7.80947	-3.65358	9.25473	FALSE	FALSE	19	0.0503145	4.31288	4.65036	0.00214994
541	104	61	O	40	0	168	107	3.57	4.2	0	lalt	TRUE	1.04298	2	0.11	FALSE	11.4212	-3.20332	-6.08185	FALSE	FALSE	20	0.00641899	7.28344	4.66915	0.00928287
542	104	62	O	40	157	193	131	4.96	4.68	1	ralt	TRUE	1.11314	2	0.0977143	FALSE	6.90185	-2.05917	-8.69895	FALSE	FALSE	19	0.0594917	4.07117	4.662	0.00896207
543	104	63	T	40	138	154	91	3.6	5.34	0	lalt	TRUE	1.24214	2	0	FALSE	3.12219	9.95526	-9.07509	FALSE	FALSE	34	0.0163903	5.93101	4.67102	0.00461905
544	104	64	D	20	3	121	112	3.94	3.75	0	ralt	FALSE	0.968209	2	0	FALSE	15.5062	16.495	-12.9769	FALSE	FALSE	9	0.0190566	5.71357	4.67819	0.00663973
545	104	65	A	20	138	154	91	4.82	5.06	0	ralt	FALSE	0.888377	2	0	FALSE	10.8582	9.62086	-4.98375	FALSE	FALSE	4	0.0106482	6.55324	4.69149	0.00806648
546	104	66	I	80	0	168	107	4.56	4.72	0	lalt	TRUE	1.07645	2	0	FALSE	4.39963	-5.00476	5.14373	FALSE	FALSE	14	0.0027747	8.49345	4.71531	0.0179851
547	104	67	D	20	75	124	89	4.42	4.53	1	ralt	TRUE	1.50039	2	0	FALSE	11.1191	-4.56093	5.83282	FALSE	FALSE	11	0.0774867	3.68991	4.70469	0.0135937
548	104	68	R	80	138	154	91	4.06	5.37	0	ralt	FALSE	1.09345	2	0	FALSE	-4.6918	-1.60553	9.44101	FALSE	FALSE	28	0.00217707	8.8434	4.72944	0.0152911
549	104	69	I	80	3	121	112	5.37	5.02	0	lalt	TRUE	1.25346	2	0	FALSE	-3.73292	-5.32568	14.4833	FALSE	FALSE	15	0.0122192	6.3547	4.74054	0.0186266
550	104	70	T	40	0	168	107	4.05	4.75	1	lalt	FALSE	1.26641	2	0	FALSE	2.34167	8.38128	-16.766	FALSE	FALSE	32	0.0566038	4.14296	4.73395	0.00506685
551	104	71	O	40	157	193	131	3.94	3.74	1	ralt	TRUE	1.04341	2	0.114571	FALSE	-13.9066	-16.2091	-1.94625	FALSE	FALSE	19	0.0638335	3.96954	4.726	0.00173894
552	104	72	A	20	3	121	112	5.44	4.58	0	lalt	TRUE	1.06858	2	0	FALSE	10.6095	1.82298	8.19806	FALSE	FALSE	3	0.0227114	5.46044	4.73041	0.00307066
553	104	73	D	20	75	124	89	5.2	4.82	1	lalt	FALSE	1.73958	2	0	FALSE	1.79484	4.73074	0.432605	FALSE	FALSE	11	0.0823957	3.60129	4.7195	0.00283306
554	104	74	O	40	157	193	131	5.21	4.57	1	ralt	TRUE	0.983567	2	0	FALSE	9.64066	10.8972	-5.62876	FALSE	FALSE	19	0.0711835	3.81231	4.71059	0.00125781
555	104	75	O	40	76	154	68	5.23	5.12	0	lalt	TRUE	1.84343	2	0	FALSE	10.2979	15.1217	-2.45155	FALSE	FALSE	18	0.0156383	5.99877	4.719	0.00370833
556	104	76	D	20	75	124	89	3.73	5.14	1	lalt	FALSE	1.04145	2	0	FALSE	8.18398	14.0641	0.398734	FALSE	FALSE	11	0.0891173	3.48815	4.70754	0.00351419
557	104	77	I	80	138	154	91	4.65	4.09	1	ralt	TRUE	1.6525	2	0	FALSE	10.6138	4.15671	-3.28209	FALSE	FALSE	16	0.0774754	3.69012	4.69798	0.00108585
558	104	78	T	40	0	168	107	4.91	4.96	1	lalt	FALSE	0.971587	2	0	FALSE	-2.39398	-9.3764	8.7659	FALSE	FALSE	32	0.0614035	4.02554	4.69133	0.00132614
559	104	79	R	80	138	154	91	4.25	4.58	0	lalt	TRUE	1.86852	2	0	FALSE	7.22996	7.8214	-4.7654	FALSE	FALSE	28	0.0106645	6.55104	4.70334	0.00470635
560	104	80	D	20	0	168	107	4.71	4.35	0	ralt	FALSE	1.67856	2	0	FALSE	11.7709	-6.17076	0.971976	FALSE	FALSE	8	0.0149642	6.06234	4.71199	0.00684325
561	104	81	O	40	157	193	131	4.99	3.88	1	ralt	TRUE	1.29058	2	0	FALSE	-12.3828	3.97479	21.2385	FALSE	FALSE	19	0.0754717	3.72792	4.70304	0.00344924
562	104	82	R	80	3	121	112	5.36	4.08	1	ralt	TRUE	1.38263	2	0	FALSE	9.12124	2.8096	-0.136362	FALSE	FALSE	27	0.0751519	3.73405	4.69429	0.00111509
563	104	83	T	40	157	193	131	4.73	4.86	0	lalt	TRUE	1.40761	2	0	FALSE	-5.24708	-18.9217	-3.26108	FALSE	FALSE	31	0.0304424	5.03778	4.69567	0.00197589
564	104	84	D	20	75	124	89	3.94	4.92	1	lalt	FALSE	1.81753	2	0.107143	FALSE	-8.21802	-13.0516	13.2788	FALSE	FALSE	11	0.0915094	3.44994	4.6849	0.00184003
565	104	85	R	80	3	121	112	5.11	4.93	1	ralt	TRUE	1.38164	2	0.129143	FALSE	-8.2453	3.12547	7.64622	FALSE	FALSE	27	0.0815531	3.61612	4.67561	0.000906707
566	104	86	R	80	3	121	112	4.17	5.37	1	ralt	TRUE	0.934633	2	0.104286	FALSE	1.59726	25.8455	-25.3247	FALSE	FALSE	27	0.0890813	3.48873	4.66548	0.00203836
567	104	87	A	20	76	154	68	5.19	4.69	1	lalt	FALSE	1.3596	2	0	FALSE	-4.3509	25.9712	-2.85025	FALSE	FALSE	0	0.0707164	3.82181	4.65808	0.000974426
568	104	88	O	40	75	124	89	5.35	4.96	0	lalt	TRUE	1.33563	2	0	FALSE	-8.22801	-9.70356	-0.346085	FALSE	FALSE	23	0.0153682	6.02391	4.66645	0.00305768
569	104	89	R	80	157	193	131	4.9	3.87	0	ralt	FALSE	1.80348	2	0.106286	FALSE	2.37846	-12.0589	9.27514	FALSE	FALSE	25	0.00890566	6.81106	4.67946	0.00645941
570	104	90	R	80	75	124	89	5.22	3.82	0	lalt	TRUE	0.975573	2	0	FALSE	-16.2859	-29.4839	22.6969	FALSE	FALSE	29	0.00314465	8.31288	4.6995	0.0124637
571	104	91	O	40	3	121	112	4.8	5.07	0	ralt	FALSE	1.10162	2	0.139714	FALSE	12.4827	10.4432	-16.3638	FALSE	FALSE	21	0.0109939	6.50715	4.71035	0.0116889
572	104	92	O	40	157	193	131	3.58	3.51	1	ralt	TRUE	1.28861	2	0	FALSE	12.794	-13.3255	11.291	FALSE	FALSE	19	0.0767983	3.70278	4.70203	0.00366613
573	104	93	I	80	0	168	107	4.18	4.91	0	lalt	TRUE	0.888811	2	0	FALSE	9.38124	4.62052	-22.1324	FALSE	FALSE	14	0.00994588	6.65168	4.71357	0.00387688
574	104	94	O	40	0	168	107	4.13	3.99	0	lalt	TRUE	1.28787	2	0.130571	FALSE	0.479974	-6.75991	-7.0484	FALSE	FALSE	20	0.0124819	6.32402	4.72305	0.00616108
575	104	95	T	40	0	168	107	4.48	4.8	1	ralt	TRUE	1.62995	2	0	FALSE	-6.81852	23.9922	1.89481	FALSE	FALSE	32	0.0610687	4.03342	4.71721	0.00332193
576	104	96	D	20	75	124	89	3.86	4.01	1	lalt	FALSE	1.59593	2	0.107429	FALSE	1.63341	-1.22894	-3.85576	FALSE	FALSE	11	0.0907662	3.4617	4.70737	0.000927172
577	104	97	I	80	138	154	91	4.11	4.7	1	missing	FALSE		2	0.116571	FALSE	2.7109	6.06541	1.78619	TRUE	TRUE	16	0.0733437	3.76918	4.69987	0.000808901
578	104	98	R	80	3	121	112	4.86	5.14	1	ralt	TRUE	0.740063	2	0	FALSE	3.95229	-12.1909	4.97257	FALSE	FALSE	27	0.0885666	3.49709	4.69057	0.000808145
579	104	99	I	80	138	154	91	3.77	3.51	1	lalt	FALSE	0.877088	2	0.121714	FALSE	-4.39809	-3.42544	-14.4119	FALSE	FALSE	16	0.0796646	3.64992	4.68247	0.000755894
580	104	100	A	20	157	193	131	5.24	4.21	0	lalt	TRUE	1.68621	2	0.100857	FALSE	-5.24856	-1.49809	24.6026	FALSE	FALSE	1	0.0234462	5.4145	4.68636	0.00182131
581	104	101	D	20	0	168	107	4.72	5.43	0	ralt	FALSE	1.95519	2	0.128	FALSE	3.99832	-20.9696	9.18838	FALSE	FALSE	8	0.0199697	5.64604	4.69163	0.00305046
582	104	102	D	20	75	124	89	4.29	5.42	1	lalt	FALSE	1.61311	2	0	FALSE	0.418716	-16.8775	6.41509	FALSE	FALSE	11	0.0940662	3.41018	4.68206	0.00193963
583	104	103	D	20	75	124	89	4.66	5.34	1	lalt	FALSE	1.52608	2	0.119714	FALSE	15.4369	-18.0684	6.19186	FALSE	FALSE	11	0.100584	3.31353	4.67196	0.00136327
584	104	104	A	20	76	154	68	4.93	3.91	1	lalt	FALSE	1.83994	2	0	FALSE	5.42453	-5.46831	2.07945	FALSE	FALSE	0	0.0692722	3.85158	4.66567	0.000721241
585	104	105	T	40	3	121	112	3.65	4.81	0	lalt	TRUE	1.27505	2	0.16	FALSE	7.46352	-5.28759	-5.63988	FALSE	FALSE	33	0.00602168	7.37562	4.68033	0.0048237
586	104	106	I	80	76	154	68	5.07	5.18	0	lalt	TRUE	0.828201	2	0	FALSE	5.44268	22.745	6.23828	FALSE	FALSE	12	0.015679	5.99502	4.68757	0.00627466
587	104	107	O	40	157	193	131	5.15	5.35	1	ralt	TRUE	1.19215	2	0.118571	FALSE	3.66664	4.83045	-16.5012	FALSE	FALSE	19	0.0757356	3.72288	4.68046	0.00228148
588	104	108	I	80	138	154	91	3.88	5.09	1	lalt	FALSE	0.9341	2	0.205714	FALSE	-1.21689	-13.1091	35.3752	FALSE	FALSE	16	0.08163	3.61476	4.67273	0.000719019
589	104	109	R	80	138	154	91	5.24	3.64	0	ralt	FALSE	1.34114	2	0	FALSE	1.59058	4.07065	-18.8526	FALSE	FALSE	28	0.0153546	6.02519	4.68008	0.00221825
590	104	110	T	40	3	121	112	3.99	3.85	0	lalt	TRUE	1.58216	2	0.107143	FALSE	-1.79485	11.4412	8.51187	FALSE	FALSE	33	0.0126648	6.30304	4.68888	0.00407178
591	104	111	T	40	0	168	107	3.86	3.58	1	lalt	FALSE	1.23131	2	0	FALSE	-5.20282	-11.1097	-10.9124	FALSE	FALSE	32	0.0612245	4.02975	4.68394	0.00264804
592	104	112	A	20	157	193	131	5.24	3.67	0	missing	FALSE		2	0.00485714	FALSE	4.07058	-1.7409	-0.0465274	TRUE	TRUE	1	0.0283019	5.14296	4.68598	0.00146133
593	104	113	D	20	76	154	68	3.97	4.85	0	lalt	TRUE	1.74439	2	0.132571	FALSE	12.0656	13.7948	-14.8242	FALSE	FALSE	6	0.0195011	5.6803	4.69115	0.00242924
594	104	114	T	40	76	154	68	4.08	4.37	0	lalt	TRUE	1.42739	2	0.103429	FALSE	10.4019	27.2708	8.28758	FALSE	FALSE	30	0.0163522	5.93437	4.69769	0.00308126
595	104	115	O	40	157	193	131	5.2	5.02	1	ralt	TRUE	1.41152	2	0.211143	FALSE	-9.56343	-9.23197	-2.819	FALSE	FALSE	19	0.0783456	3.674	4.6906	0.00197942
596	104	116	A	20	76	154	68	4.16	3.51	1	ralt	TRUE	0.876485	2	0.115714	FALSE	1.94212	2.5831	16.0657	FALSE	FALSE	0	0.0703823	3.82864	4.68456	0.000690988
597	104	117	D	20	157	193	131	5.38	4.03	0	lalt	TRUE	1.08062	2	0.136	FALSE	11.9392	12.0691	-18.4632	FALSE	FALSE	7	0.00332963	8.23042	4.70163	0.0062933
598	104	118	O	40	138	154	91	3.59	4.71	0	missing	FALSE		2	0.13	FALSE	13.2667	19.2457	-40.2534	TRUE	TRUE	22	0.016295	5.93942	4.708	0.00747942
599	104	119	R	80	0	168	107	5.34	4.76	0	lalt	TRUE	0.773691	2	0.126286	FALSE	10.2653	3.13129	-12.6408	FALSE	FALSE	26	0.0136336	6.19669	4.71566	0.00342479
600	104	120	R	80	75	124	89	4.82	3.79	0	ralt	FALSE	1.04116	3	0.130857	FALSE	13.0248	-27.9327	17.6733	FALSE	FALSE	29	0.00895017	6.80387	4.72629	0.0044807
601	104	121	O	40	138	154	91	3.73	5.1	0	lalt	TRUE	0.678349	3	0.123143	FALSE	-0.087798	10.6569	-12.748	FALSE	FALSE	22	0.0223531	5.48338	4.72992	0.00376269
602	104	122	I	80	138	154	91	4.14	3.84	1	ralt	TRUE	0.700432	3	0	FALSE	-8.07211	0.416493	11.6257	FALSE	FALSE	16	0.0807261	3.63082	4.72269	0.00141657
603	104	123	R	80	3	121	112	3.97	3.66	1	ralt	TRUE	0.763636	3	0	FALSE	-3.86912	3.53579	-1.66885	FALSE	FALSE	27	0.0809303	3.62718	4.71553	0.000572543
604	104	124	O	40	0	168	107	4.64	3.84	0	lalt	TRUE	0.962797	3	0.105714	FALSE	-6.46817	1.60351	11.9524	FALSE	FALSE	20	0.0163915	5.93091	4.72158	0.00175231
605	104	125	D	20	138	154	91	5.02	5.02	0	lalt	TRUE	1.03992	3	0	FALSE	-6.50391	-6.10069	14.0842	FALSE	FALSE	10	0.012188	6.3584	4.72975	0.0033642
606	104	126	I	80	157	193	131	3.82	5.49	0	lalt	TRUE	1.43087	3	0	FALSE	1.52135	-7.27662	2.60747	FALSE	FALSE	13	0.00139762	9.48281	4.74945	0.0113261
607	104	127	R	80	157	193	131	4.52	4.25	0	lalt	TRUE	1.52487	3	0	FALSE	9.37455	3.52515	-6.66937	FALSE	FALSE	25	0.0129645	6.26929	4.75693	0.0111361
608	104	128	A	20	0	168	107	4.03	4.11	0	ralt	FALSE	1.17493	3	0.133143	FALSE	6.10279	-11.8103	20.4294	FALSE	FALSE	2	0.016682	5.90556	4.76249	0.00312866
609	104	129	A	20	76	154	68	4.79	5.48	1	ralt	TRUE	1.07104	3	0.112857	FALSE	-2.90561	-16.1912	5.21429	FALSE	FALSE	0	0.0708977	3.81812	4.75646	0.00167969
610	104	130	O	40	3	121	112	4.55	4.46	0	missing	FALSE		3	0.11	FALSE	0.00652879	1.71357	1.39214	TRUE	TRUE	21	0.0144351	6.11428	4.76302	0.00184874
611	104	131	I	80	75	124	89	4.07	4.16	0	lalt	TRUE	1.23296	3	0.106286	FALSE	-24.8466	-15.1137	9.62815	FALSE	FALSE	17	0.00135578	9.52666	4.7822	0.0106872
612	104	132	I	80	138	154	91	4.21	4.19	1	lalt	FALSE	1.13308	3	0	FALSE	21.601	27.3498	-18.44	FALSE	FALSE	16	0.0818733	3.61046	4.77499	0.00935256
613	104	133	D	20	75	124	89	4.42	4.83	1	lalt	FALSE	1.13118	3	0.115429	FALSE	7.0374	1.75003	14.1026	FALSE	FALSE	11	0.0886458	3.4958	4.76721	0.000477784
614	104	134	I	80	75	124	89	4.07	4.4	0	lalt	TRUE	1.56219	3	0.111714	FALSE	-10.9316	-8.59762	15.1463	FALSE	FALSE	17	0.00721421	7.11494	4.7782	0.00294001
615	104	135	O	40	157	193	131	4.79	4.02	1	ralt	TRUE	1.23222	3	0.115429	FALSE	0.77549	-10.3125	20.8194	FALSE	FALSE	19	0.0750303	3.73638	4.77185	0.00296828
616	104	136	O	40	157	193	131	4.21	5.49	1	ralt	TRUE	0.796376	3	0	FALSE	2.90753	7.32431	-23.584	FALSE	FALSE	19	0.0804081	3.63652	4.76502	0.00114006
617	104	137	D	20	0	168	107	3.58	4.91	0	ralt	FALSE	1.8983	3	0.105714	FALSE	-13.6595	1.95486	19.6954	FALSE	FALSE	8	0.0215945	5.53319	4.76843	0.00121887
618	104	138	O	40	76	154	68	3.62	3.86	0	lalt	TRUE	1.2334	3	0.110571	FALSE	0.809523	9.88629	-13.6377	FALSE	FALSE	18	0.0157233	5.99095	4.77409	0.00227205
619	104	139	O	40	157	193	131	4.33	5.47	1	ralt	TRUE	1.03558	3	0	FALSE	17.75	-7.98405	28.6889	FALSE	FALSE	19	0.0847439	3.56075	4.76695	0.00151952
620	104	140	R	80	3	121	112	4.02	4.19	1	ralt	TRUE	0.903593	3	0.0128571	FALSE	7.59083	2.46845	-24.7506	FALSE	FALSE	27	0.078795	3.66575	4.76047	0.000463083
621	104	141	R	80	3	121	112	3.98	3.96	1	ralt	TRUE	0.806846	3	0.117429	FALSE	3.379	7.89277	-6.33242	FALSE	FALSE	27	0.0839996	3.57347	4.75355	0.00102467
622	104	142	I	80	138	154	91	4.71	3.97	1	lalt	FALSE	0.699896	3	0	FALSE	-2.21533	8.31878	12.8814	FALSE	FALSE	16	0.0828917	3.59263	4.74682	0.00044159
623	104	143	R	80	3	121	112	4.44	5.1	1	ralt	TRUE	0.970976	3	0.116857	FALSE	-10.1964	-18.629	0.168225	FALSE	FALSE	27	0.0886476	3.49577	4.73965	0.000423359
624	104	144	T	40	0	168	107	3.78	5.47	1	lalt	FALSE	1.237	3	0	FALSE	21.6125	29.19	-16.4059	FALSE	FALSE	32	0.0555556	4.16993	4.73614	0.00054319
625	104	145	A	20	138	154	91	4.89	4.43	0	lalt	TRUE	1.02803	3	0.0991429	FALSE	2.18121	-28.1418	17.2358	FALSE	FALSE	4	0.0114667	6.44641	4.74389	0.00195661
626	104	146	R	80	3	121	112	3.98	4.04	1	ralt	TRUE	0.995087	3	0	FALSE	8.6357	-1.6886	-5.9739	FALSE	FALSE	27	0.0926809	3.43158	4.73652	0.00179394
627	104	147	O	40	157	193	131	5.12	4.71	1	lalt	FALSE	0.982247	3	0.105143	FALSE	-10.3428	-16.9924	27.8013	FALSE	FALSE	19	0.0865038	3.53109	4.72974	0.000384701
628	104	148	R	80	3	121	112	5.3	3.92	1	ralt	TRUE	0.56823	3	0	FALSE	-3.27619	-3.19813	-8.36687	FALSE	FALSE	27	0.0971083	3.36426	4.72217	0.000370626
629	104	149	D	20	157	193	131	4.34	3.93	0	lalt	TRUE	1.1003	3	0.100857	FALSE	7.88305	-1.00753	3.05776	FALSE	FALSE	7	0.0081591	6.93737	4.73196	0.00226679
630	104	150	T	40	0	168	107	3.83	5.22	1	lalt	FALSE	1.53939	3	0	FALSE	-16.8714	-18.7451	13.9966	FALSE	FALSE	32	0.0591398	4.07973	4.72816	0.00238366
631	104	151	A	20	76	154	68	3.58	4.19	1	lalt	FALSE	0.994431	3	0	FALSE	8.77059	-12.1112	18.2253	FALSE	FALSE	0	0.0679043	3.88035	4.72337	0.000551012
632	104	152	O	40	75	124	89	4.5	4.85	0	lalt	TRUE	1.27057	3	0.129143	FALSE	-0.00352624	-7.41796	-16.0093	FALSE	FALSE	23	0.0154556	6.01572	4.72905	0.00139603
633	104	153	T	40	3	121	112	4.85	3.59	0	ralt	FALSE	1.12762	3	0.106	FALSE	-20.3355	-15.0613	31.8032	FALSE	FALSE	33	0.0150744	6.05176	4.73483	0.00229702
634	104	154	T	40	3	121	112	5.4	5.27	0	lalt	TRUE	1.23068	3	0.157714	FALSE	-10.058	-5.34883	-10.5676	FALSE	FALSE	33	0.0202582	5.62535	4.7386	0.00429157
635	104	155	D	20	75	124	89	3.54	5.09	1	lalt	FALSE	1.44161	3	0.402571	TRUE	7.01788	33.5046	-4.49657	FALSE	FALSE	11	0.0836708	3.57913	4.73235	0.00105259
636	104	156	D	20	75	124	89	4.02	5.21	1	lalt	FALSE	0.836713	3	0.0411429	FALSE	-18.5033	-16.0021	-5.90387	FALSE	FALSE	11	0.0884434	3.4991	4.72577	0.000820737
637	104	157	D	20	3	121	112	4.99	5.41	0	ralt	FALSE	0.727785	3	0.118	FALSE	5.16398	-4.9816	11.4036	FALSE	FALSE	9	0.0150552	6.05359	4.73148	0.00129147
638	104	158	A	20	76	154	68	5.37	5.07	1	lalt	FALSE	0.857721	3	0.120286	FALSE	10.6988	11.3716	-15.1169	FALSE	FALSE	0	0.0706088	3.82401	4.72658	0.00133527
639	104	159	O	40	76	154	68	4.3	5.07	0	lalt	TRUE	0.863709	3	0.0345714	FALSE	25.7595	16.8651	-14.2529	FALSE	FALSE	18	0.0191582	5.70589	4.73069	0.00109414
640	104	160	R	80	75	124	89	3.87	3.54	0	lalt	TRUE	0.863731	3	0.385429	FALSE	12.075	27.7209	-18.7605	FALSE	FALSE	29	0.0122256	6.35395	4.73759	0.0021791
641	104	161	D	20	138	154	91	4.45	3.86	0	lalt	TRUE	0.81292	3	0	FALSE	20.1613	22.2452	-13.1553	FALSE	FALSE	10	0.0150369	6.05535	4.74316	0.00238119
642	104	162	T	40	0	168	107	3.84	5.28	1	lalt	FALSE	1.34305	3	0.224571	FALSE	10.0034	22.8916	-15.8527	FALSE	FALSE	32	0.0606061	4.04439	4.73937	0.00132603
643	104	163	R	80	3	121	112	5.12	4.41	1	ralt	TRUE	0.822104	3	0.138571	FALSE	-11.251	5.7589	1.46827	FALSE	FALSE	27	0.0948137	3.39876	4.7325	0.000407791
644	104	164	T	40	138	154	91	5.43	4.75	0	lalt	TRUE	0.787149	3	0.112857	FALSE	-10.009	-15.7119	20.8714	FALSE	FALSE	34	0.0131132	6.25284	4.73886	0.0013366
645	104	165	T	40	75	124	89	5.31	4.08	0	lalt	TRUE	0.498179	3	0.277714	FALSE	-0.264046	5.84813	-19.129	FALSE	FALSE	35	0.0122031	6.3566	4.74559	0.00243491
646	104	166	I	80	138	154	91	4.42	3.82	1	lalt	FALSE	0.261272	3	0.37	FALSE	-15.8808	-15.4011	0.334096	FALSE	FALSE	16	0.0779936	3.6805	4.74014	0.00143466
647	104	167	I	80	157	193	131	4.59	5.17	0	lalt	TRUE	1.25235	3	0.459429	TRUE	1.62507	-20.5344	28.3781	FALSE	FALSE	13	0.00604145	7.37089	4.75074	0.00246688
648	104	168	T	40	0	168	107	4.78	4.19	1	lalt	FALSE	0.825376	3	0	FALSE	-6.42383	-8.14014	-16.4696	FALSE	FALSE	32	0.0637255	3.97199	4.74669	0.00250042
649	104	169	I	80	76	154	68	3.53	4.37	0	lalt	TRUE	1.14442	3	0.122	FALSE	5.13932	-2.18051	6.72206	FALSE	FALSE	12	0.0157386	5.98955	4.75176	0.00118215
650	104	170	R	80	3	121	112	5.45	4.39	1	ralt	TRUE	1.25258	3	0	FALSE	2.65289	26.185	-9.24309	FALSE	FALSE	27	0.0964462	3.37413	4.74495	0.00108786
651	104	171	R	80	3	121	112	5.06	3.53	1	ralt	TRUE	0.589604	3	0	FALSE	-5.61437	13.4868	25.0074	FALSE	FALSE	27	0.100811	3.31027	4.7379	0.000608775
652	104	172	I	80	3	121	112	3.76	4.01	0	lalt	TRUE	1.07768	3	0.289714	FALSE	-7.72055	2.52821	-8.23006	FALSE	FALSE	15	0.0109761	6.5095	4.74507	0.00142586
653	104	173	T	40	0	168	107	4.48	5.5	1	lalt	FALSE	0.793897	3	0.119429	FALSE	19.8265	14.7115	-9.32267	FALSE	FALSE	32	0.0669856	3.9	4.74082	0.00149706
654	104	174	R	80	138	154	91	3.67	4.46	0	lalt	TRUE	0.640903	3	0.473429	TRUE	-2.7724	0.788035	-5.72736	FALSE	FALSE	28	0.0153639	6.02431	4.74595	0.00113783
655	104	175	I	80	3	121	112	4.84	5.11	0	lalt	TRUE	0.885035	3	0.154571	FALSE	17.911	20.4556	-11.5696	FALSE	FALSE	15	0.0155593	6.00608	4.75097	0.00184009
656	104	176	A	20	76	154	68	5.07	5.21	1	lalt	FALSE	0.898026	3	0.220286	FALSE	-3.58488	-10.3624	41.805	FALSE	FALSE	0	0.0693307	3.85036	4.74653	0.0011017
657	104	177	I	80	75	124	89	4.42	4.47	0	missing	FALSE		3	0.238571	FALSE	6.44211	16.0826	-2.09017	TRUE	TRUE	17	0.0104527	6.57999	4.75379	0.00148853
658	104	178	I	80	0	168	107	4.23	4.64	0	lalt	TRUE	0.836966	3	0.226	FALSE	19.3257	48.6448	-29.1223	FALSE	FALSE	14	0.0106683	6.55052	4.76087	0.00255106
659	104	179	T	40	138	154	91	4.86	4.27	0	lalt	TRUE	1.52699	3	0.130571	FALSE	-1.89073	-14.6866	-56.4363	FALSE	FALSE	34	0.0168495	5.89115	4.76527	0.00207131
660	104	180	A	20	76	154	68	5.28	5.13	1	ralt	TRUE	0.648257	4	0	FALSE	14.5855	13.4258	10.9939	FALSE	FALSE	0	0.0726764	3.78237	4.76055	0.000988944
661	104	181	O	40	0	168	107	4.51	4.21	0	lalt	TRUE	0.720245	4	0	FALSE	-17.8544	-15.7448	49.1492	FALSE	FALSE	20	0.0166942	5.90451	4.76497	0.000984691
662	104	182	R	80	3	121	112	4.4	4.37	1	lalt	FALSE	0.724347	4	0.106286	FALSE	4.63277	9.24491	-42.5586	FALSE	FALSE	27	0.100312	3.31744	4.75823	0.000923348
663	104	183	T	40	75	124	89	3.58	4.13	0	lalt	TRUE	0.799443	4	0	FALSE	1.54243	6.20675	-9.2355	FALSE	FALSE	35	0.0157663	5.98701	4.76296	0.000957001
664	104	184	A	20	75	124	89	4.48	3.63	0	lalt	TRUE	0.81462	4	0.113714	FALSE	-20.1049	-10.2487	14.2386	FALSE	FALSE	5	0.0129503	6.27088	4.76876	0.00183701
665	104	185	O	40	157	193	131	4.71	4.91	1	ralt	TRUE	1.60072	4	0.101714	FALSE	-7.8304	1.09072	0.0587745	FALSE	FALSE	19	0.0761547	3.71492	4.76384	0.00115691
666	104	186	T	40	0	168	107	4.98	3.55	1	ralt	TRUE	1.2387	4	0	FALSE	7.32097	-6.13248	20.2361	FALSE	FALSE	32	0.0675676	3.88753	4.75972	0.000341141
667	104	187	I	80	0	168	107	5.15	5.05	0	lalt	TRUE	0.866755	4	0.112857	FALSE	-0.788454	-15.0141	13.1749	FALSE	FALSE	14	0.0147221	6.08588	4.76476	0.00104638
668	104	188	T	40	0	168	107	3.6	4.13	1	lalt	FALSE	0.994784	4	0.102571	FALSE	-11.5904	7.13372	15.3836	FALSE	FALSE	32	0.0714286	3.80735	4.76032	0.00102918
669	104	189	I	80	138	154	91	4.51	4.96	1	ralt	TRUE	1.21294	4	0.0914286	FALSE	7.59813	-22.7461	-3.38058	FALSE	FALSE	16	0.0744654	3.74729	4.75566	0.00032545
670	104	190	O	40	157	193	131	5.02	4.8	1	ralt	TRUE	0.907971	4	0.104286	FALSE	8.74071	-2.93064	4.06844	FALSE	FALSE	19	0.0788946	3.66393	4.75069	0.000304653
671	104	191	A	20	76	154	68	4.45	4.1	1	ralt	TRUE	1.01297	4	0	FALSE	5.12275	32.0323	5.14858	FALSE	FALSE	0	0.07356	3.76494	4.7462	0.000304179
672	104	192	O	40	157	193	131	4.79	4.66	1	ralt	TRUE	0.882101	4	0.102	FALSE	-39.0512	-32.1115	31.7509	FALSE	FALSE	19	0.0825885	3.59791	4.74103	0.000294041
673	104	193	O	40	75	124	89	5.06	4.33	0	lalt	TRUE	1.47808	4	0.0202857	FALSE	-11.0073	8.19082	8.56246	FALSE	FALSE	23	0.0170553	5.87364	4.74523	0.00085092
674	104	194	O	40	157	193	131	5.14	4.79	1	missing	FALSE		4	0.118571	FALSE	-6.78714	-19.887	3.91001	TRUE	TRUE	19	0.0862182	3.53586	4.73985	0.00083939
675	104	195	I	80	75	124	89	3.9	4.79	0	lalt	TRUE	0.925966	4	0.237143	FALSE	-25.879	-14.9064	7.7189	FALSE	FALSE	17	0.0139672	6.16182	4.74512	0.000977477
676	104	196	A	20	76	154	68	4.91	4.75	1	lalt	FALSE	1.17905	4	0.110571	FALSE	21.3849	19.4339	-10.8827	FALSE	FALSE	0	0.076285	3.71246	4.74053	0.000991676
677	104	197	A	20	138	154	91	4.04	4.41	0	lalt	TRUE	0.465107	4	0.104857	FALSE	2.37978	1.80268	-0.613784	FALSE	FALSE	4	0.0131994	6.24338	4.74606	0.00102652
678	104	198	I	80	138	154	91	4.71	3.55	1	lalt	FALSE	0.787229	4	0.204571	FALSE	-2.46417	-11.3166	6.95994	FALSE	FALSE	16	0.0758749	3.72023	4.74153	0.00102185
679	104	199	A	20	0	168	107	5.5	4.06	0	lalt	TRUE	1.09934	4	0.11	FALSE	10.2894	5.64261	5.55108	FALSE	FALSE	2	0.0158972	5.97508	4.74602	0.000870514
680	104	200	T	40	0	168	107	4.99	4.54	1	lalt	FALSE	1.16835	4	0.0977143	FALSE	0.357296	8.09707	-11.2526	FALSE	FALSE	32	0.0720339	3.79518	4.74184	0.000874392
681	104	201	I	80	157	193	131	4.02	4.69	0	ralt	FALSE	1.12225	4	0.119429	FALSE	-1.50984	-0.41501	-12.9278	FALSE	FALSE	13	0.00939416	6.73402	4.74903	0.00131742
682	104	202	D	20	3	121	112	4.9	5.47	0	lalt	TRUE	1.62341	4	0	FALSE	0.747107	10.2471	-10.3248	FALSE	FALSE	9	0.0164103	5.92925	4.75327	0.00185211
683	104	203	I	80	138	154	91	5.27	4.94	1	lalt	FALSE	2.10232	4	0.102	FALSE	-14.95	-16.1118	13.0286	FALSE	FALSE	16	0.0784716	3.67169	4.74862	0.000818289
684	104	204	T	40	0	168	107	4.12	5.33	1	lalt	FALSE	1.1792	4	0	FALSE	4.55386	26.1193	-6.99751	FALSE	FALSE	32	0.075	3.73697	4.74427	0.000270165
685	104	205	D	20	75	124	89	3.6	4.69	1	lalt	FALSE	1.01323	4	0.0868571	FALSE	-3.74711	-7.99104	12.9937	FALSE	FALSE	11	0.0746105	3.74448	4.73999	0.000275854
686	104	206	A	20	76	154	68	4.37	5.04	1	ralt	TRUE	0.883374	4	0.101143	FALSE	12.9838	-2.08342	-16.0393	FALSE	FALSE	0	0.0772649	3.69404	4.73554	0.000268981
687	104	207	R	80	76	154	68	5.49	4.43	0	lalt	TRUE	0.974407	4	0	FALSE	-11.0506	2.59185	9.46251	FALSE	FALSE	24	0.00939514	6.73387	4.7426	0.00124545
688	104	208	D	20	138	154	91	4.21	5.33	0	lalt	TRUE	1.10138	4	0.0988571	FALSE	11.3122	4.04615	6.59879	FALSE	FALSE	10	0.0162388	5.94441	4.74683	0.00177326
689	104	209	A	20	76	154	68	4.94	5.21	1	lalt	FALSE	0.941394	4	0.104286	FALSE	5.90623	-7.14835	12.1001	FALSE	FALSE	0	0.0804005	3.63665	4.74219	0.000783102
690	104	210	D	20	75	124	89	5.4	4.43	1	lalt	FALSE	0.847407	4	0.109143	FALSE	-3.67494	-1.26121	-12.0669	FALSE	FALSE	11	0.0771591	3.69602	4.73781	0.000249488
691	104	211	R	80	157	193	131	4.1	3.87	0	lalt	TRUE	0.770425	4	0.100286	FALSE	4.00245	-2.73677	-3.43691	FALSE	FALSE	25	0.0126041	6.30997	4.74332	0.000951221
692	104	212	A	20	3	121	112	4.15	3.83	0	lalt	TRUE	1.37952	4	0	FALSE	-0.818486	-7.75015	-6.43219	FALSE	FALSE	3	0.0139227	6.16642	4.74827	0.00156561
693	104	213	I	80	138	154	91	5.41	4.83	1	ralt	TRUE	1.87955	4	0.103143	FALSE	4.30433	-9.80581	7.44878	FALSE	FALSE	16	0.0793362	3.65588	4.74377	0.000862206
694	104	214	D	20	157	193	131	4.74	4.42	0	lalt	TRUE	1.16058	4	0.102571	FALSE	23.8757	21.6791	-13.9976	FALSE	FALSE	7	0.0100377	6.63842	4.75031	0.00111472
695	104	215	D	20	75	124	89	4.81	3.63	1	lalt	FALSE	0.762627	4	0	FALSE	13.82	-11.3521	2.6866	FALSE	FALSE	11	0.0796061	3.65098	4.74582	0.00110889
696	104	216	T	40	0	168	107	4.98	5.1	1	lalt	FALSE	0.800745	4	0.101714	FALSE	1.18977	3.73975	2.13993	FALSE	FALSE	32	0.0753968	3.72935	4.74167	0.00024255
697	104	217	A	20	75	124	89	4.17	3.57	0	lalt	TRUE	1.07971	4	0.0471429	FALSE	10.1374	4.58445	-5.94067	FALSE	FALSE	5	0.0152137	6.03849	4.7461	0.000783085
698	104	218	D	20	157	193	131	4.85	5.39	0	lalt	TRUE	1.07789	4	0.098	FALSE	-3.84851	18.6618	-19.7864	FALSE	FALSE	7	0.0138167	6.17745	4.75099	0.00137269
699	104	219	A	20	76	154	68	4.86	3.61	1	lalt	FALSE	0.946849	4	0	FALSE	-2.51436	-15.0831	7.25481	FALSE	FALSE	0	0.0811691	3.62293	4.74646	0.000825687
700	104	220	T	40	0	168	107	3.85	5.36	1	lalt	FALSE	0.448986	4	0	FALSE	-19.9528	-4.81597	15.2114	FALSE	FALSE	32	0.078125	3.67807	4.74218	0.000227618
701	104	221	I	80	138	154	91	5.14	4	1	ralt	TRUE	1.2861	4	0.0937143	FALSE	19.7333	-0.914429	1.40329	FALSE	FALSE	16	0.0807577	3.63026	4.73774	0.000226549
702	104	222	O	40	157	193	131	4.91	5.08	1	ralt	TRUE	0.915005	4	0	FALSE	-4.96306	-3.81345	10.8878	FALSE	FALSE	19	0.0807372	3.63062	4.73335	0.000220468
703	104	223	A	20	138	154	91	5.22	5.07	0	ralt	FALSE	1.71795	4	0.0982857	FALSE	-0.538281	-30.0236	15.2791	FALSE	FALSE	4	0.0157354	5.98984	4.73756	0.000719252
704	104	224	R	80	76	154	68	5.23	3.86	0	lalt	TRUE	1.35897	4	0	FALSE	0.132424	-15.4964	9.262	FALSE	FALSE	24	0.012627	6.30734	4.74282	0.00135346
705	104	225	R	80	75	124	89	5.43	4.34	0	lalt	TRUE	0.960039	4	0	FALSE	14.3478	41.3558	-36.9274	FALSE	FALSE	29	0.0130124	6.26397	4.74789	0.00146331
706	104	226	O	40	3	121	112	3.75	5.09	0	lalt	TRUE	1.208	4	0.100286	FALSE	18.036	34.0739	-25.2783	FALSE	FALSE	21	0.0129627	6.26949	4.75295	0.00143461
707	104	227	T	40	0	168	107	3.62	4.18	1	lalt	FALSE	0.948086	4	0	FALSE	-14.8568	9.39411	2.34268	FALSE	FALSE	32	0.0798479	3.6466	4.74864	0.000821961
708	104	228	R	80	3	121	112	4.8	3.99	1	ralt	TRUE	0.501276	4	0.104857	FALSE	22.1026	18.9462	-3.39445	FALSE	FALSE	27	0.0866209	3.52914	4.74394	0.000203653
709	104	229	T	40	76	154	68	3.94	4.51	0	ralt	FALSE	1.18733	4	0.0931429	FALSE	-16.9769	-6.0596	3.71788	FALSE	FALSE	30	0.0130295	6.26207	4.74893	0.00079486
710	104	230	I	80	138	154	91	5.29	4.52	1	ralt	TRUE	1.04045	4	0.101714	FALSE	10.7534	26.8934	-14.9064	FALSE	FALSE	16	0.0817847	3.61203	4.74456	0.000797907
711	104	231	T	40	0	168	107	4.58	3.84	1	lalt	FALSE	0.613486	4	0.0982857	FALSE	3.81184	-6.32727	-3.88006	FALSE	FALSE	32	0.082397	3.60126	4.74019	0.00020203
712	104	232	R	80	0	168	107	5.07	3.62	0	lalt	TRUE	0.602615	4	0.201714	FALSE	11.2564	0.0977628	-27.4781	FALSE	FALSE	26	0.0116164	6.42769	4.74569	0.000861599
713	104	233	R	80	3	121	112	4.4	4.71	1	ralt	TRUE	1.01668	4	0.13	FALSE	5.44341	7.63524	-8.82396	FALSE	FALSE	27	0.0887283	3.49446	4.74095	0.000849321
714	104	234	D	20	75	124	89	4.33	5.44	1	lalt	FALSE	1.29473	4	0.216	FALSE	22.3844	26.8518	-18.8186	FALSE	FALSE	11	0.0777079	3.68579	4.73695	0.000195411
715	104	235	I	80	138	154	91	3.56	5.15	1	ralt	TRUE	0.717758	4	0	FALSE	8.49377	1.55511	0.668579	FALSE	FALSE	16	0.0839657	3.57406	4.73256	0.000200123
716	104	236	O	40	157	193	131	5.45	4.67	1	ralt	TRUE	0.759865	4	0.100286	FALSE	11.2517	-3.67785	8.5457	FALSE	FALSE	19	0.080258	3.63921	4.72845	0.000194783
717	104	237	I	80	138	154	91	4.63	3.78	1	ralt	TRUE	0.834849	4	0.117429	FALSE	-6.58335	4.98504	-6.12677	FALSE	FALSE	16	0.0870136	3.52262	4.72395	0.000189479
718	104	238	D	20	76	154	68	3.65	4.33	0	ralt	FALSE	0.795949	4	0.120571	FALSE	3.9405	21.0056	-15.0841	FALSE	FALSE	6	0.0142542	6.13247	4.72846	0.000691231
719	104	239	I	80	157	193	131	5.06	4.33	0	ralt	FALSE	0.812077	4	0.111429	FALSE	25.6248	35.565	-8.75519	FALSE	FALSE	13	0.0117324	6.41336	4.73384	0.00131769
720	105	0	O	20	3	121	112	3.76	4.95	0	lalt	FALSE	0.570313	1	0	FALSE	0.82599	-4.40906	30.0055	FALSE	FALSE	21	0.0204403	5.61244	4.54231	0.0185597
721	105	1	O	20	75	124	89	4.73	4.82	0	ralt	TRUE	1.00936	1	0	FALSE	7.40161	-35.2635	35.3047	FALSE	FALSE	23	0.0229475	5.44552	4.54992	0.0331944
722	105	2	R	80	3	121	112	5.39	4.5	0	lalt	FALSE	2.43019	1	0	FALSE	20.1367	29.5898	-48.629	FALSE	FALSE	27	0.00893744	6.80592	4.57723	0.0452932
723	105	3	I	40	0	168	107	5.49	3.83	1	ralt	FALSE	2.11118	1	0	FALSE	-1.18688	-8.60437	9.36372	FALSE	FALSE	14	0.0754717	3.72792	4.55093	0.0339034
724	105	4	T	80	75	124	89	5.43	4.14	0	ralt	TRUE	1.27198	1	0	FALSE	19.7353	35.2415	-26.3922	FALSE	FALSE	35	0.00566038	7.46489	4.58472	0.0413432
725	105	5	A	20	157	193	131	3.7	4.16	0	ralt	TRUE	1.42891	1	0	FALSE	11.6487	-0.788016	2.70416	FALSE	FALSE	1	0.0207087	5.59362	4.59407	0.0502177
726	105	6	R	80	138	154	91	5.22	4.89	1	ralt	FALSE	1.32298	1	0	FALSE	3.48006	-15.2312	19.2593	FALSE	FALSE	28	0.11186	3.16024	4.55778	0.0164639
727	105	7	D	40	75	124	89	4.74	4.12	0	lalt	FALSE	1.86379	1	0.104571	FALSE	18.35	-2.45819	-2.55028	FALSE	FALSE	11	0.01448	6.10979	4.57526	0.0199006
728	105	8	O	20	138	154	91	4.68	5.16	0	lalt	FALSE	1.08184	1	0.122857	FALSE	7.91311	15.6704	-14.0744	FALSE	FALSE	22	0.0205832	5.60239	4.58505	0.0296901
729	105	9	T	80	3	121	112	5.43	4.74	1	ralt	FALSE	1.23073	1	0.118571	FALSE	9.74873	-32.28	18.4428	FALSE	FALSE	33	0.10566	3.24249	4.55313	0.014783
730	105	10	I	40	76	154	68	4.61	4.53	0	lalt	FALSE	1.21362	1	0.124857	FALSE	-13.374	-20.6509	16.0172	FALSE	FALSE	12	0.0184578	5.75963	4.56565	0.0151577
731	105	11	O	20	76	154	68	4.31	4.8	1	ralt	FALSE	1.06557	1	0.119714	FALSE	10.5069	-0.77118	1.63141	FALSE	FALSE	18	0.0433561	4.52762	4.55877	0.0183088
732	105	12	T	80	76	154	68	3.59	5.27	0	ralt	TRUE	2.42847	1	0.140286	FALSE	-6.99926	-15.6911	7.44325	FALSE	FALSE	30	0.00353774	8.14296	4.5952	0.0420606
733	105	13	A	20	75	124	89	4.1	4.74	1	ralt	FALSE	1.13949	1	0	FALSE	-1.36843	10.094	-12.3006	FALSE	FALSE	5	0.0369657	4.75767	4.59193	0.0419069
734	105	14	I	40	157	193	131	4.33	5.01	0	lalt	FALSE	0.754502	1	0.116286	FALSE	15.4176	-1.04351	10.9336	FALSE	FALSE	13	0.0101887	6.61689	4.61383	0.0236237
735	105	15	A	20	75	124	89	4.21	4.88	1	ralt	FALSE	1.33647	1	0.108286	FALSE	4.10927	15.5248	-4.36765	FALSE	FALSE	5	0.0551239	4.18118	4.60134	0.0210834
736	105	16	R	80	3	121	112	5.31	5.45	0	ralt	TRUE	0.827586	1	0.238857	FALSE	11.9573	-1.03118	-7.52582	FALSE	FALSE	27	0.025762	5.27861	4.60609	0.0115887
737	105	17	O	20	0	168	107	3.78	5.21	0	lalt	FALSE	1.10533	1	0.254	FALSE	11.6424	10.6203	-11.5722	FALSE	FALSE	20	0.0138839	6.17044	4.62223	0.0202071
738	105	18	O	20	138	154	91	4.4	3.92	0	lalt	FALSE	1.14332	1	0.122	FALSE	-5.7813	-5.58998	11.0067	FALSE	FALSE	22	0.03529	4.8246	4.62023	0.0177893
739	105	19	A	20	138	154	91	3.95	5.11	0	lalt	FALSE	1.25137	1	0.008	FALSE	-8.1437	0.576688	21.7809	FALSE	FALSE	4	0.0174957	5.83685	4.63193	0.0151317
740	105	20	A	20	75	124	89	4.2	3.57	1	lalt	TRUE	0.944303	1	0.121143	FALSE	0.749693	-29.1127	6.90881	FALSE	FALSE	5	0.0680593	3.87706	4.61584	0.0122333
741	105	21	D	40	157	193	131	5.23	4.98	1	ralt	FALSE	1.40644	1	0.114571	FALSE	-9.17957	-10.1367	11.237	FALSE	FALSE	7	0.0516385	4.27541	4.60638	0.00594686
742	105	22	I	40	0	168	107	4.85	4.33	1	ralt	FALSE	1.39231	1	0.106	FALSE	24.2603	13.575	-5.12713	FALSE	FALSE	14	0.0679896	3.87854	4.59138	0.0057691
743	105	23	O	20	76	154	68	4.3	3.96	1	ralt	FALSE	0.739308	1	0	FALSE	-2.22441	15.589	-9.27473	FALSE	FALSE	18	0.051487	4.27965	4.58281	0.005583
744	105	24	A	20	3	121	112	4.93	4.2	0	lalt	FALSE	1.26236	1	0	FALSE	-10.3282	4.05268	2.99865	FALSE	FALSE	3	0.0141509	6.14296	4.59819	0.0131175
745	105	25	A	20	75	124	89	4.37	5.22	1	lalt	TRUE	0.785416	1	0	FALSE	-10.0675	8.22627	-0.819674	FALSE	FALSE	5	0.0788741	3.6643	4.58105	0.0117172
746	105	26	D	40	76	154	68	4.57	5.16	0	ralt	TRUE	0.852336	1	0	FALSE	-3.35952	32.1255	4.20143	FALSE	FALSE	6	0.00639075	7.2898	4.60686	0.0188595
747	105	27	O	20	138	154	91	4.86	5.49	0	ralt	TRUE	0.716227	1	0	FALSE	1.212	38.1803	-26.0231	FALSE	FALSE	22	0.0461216	4.43841	4.60091	0.0198788
748	105	28	T	80	157	193	131	3.53	5.02	0	ralt	TRUE	0.959184	1	0	FALSE	-7.50876	10.0702	-2.38932	FALSE	FALSE	31	0.0026533	8.558	4.63405	0.0306601
749	105	29	I	40	3	121	112	5.1	4.03	0	lalt	FALSE	0.789246	1	0	FALSE	-13.3588	-12.8926	17.5576	FALSE	FALSE	15	0.0113208	6.46489	4.65125	0.03752
750	105	30	O	20	76	154	68	4.11	4.27	1	lalt	TRUE	1.02322	1	0	FALSE	4.95755	13.9432	-21.5259	FALSE	FALSE	18	0.0611778	4.03085	4.63968	0.01236
751	105	31	I	40	76	154	68	4.67	5.32	0	lalt	FALSE	0.930307	1	0	FALSE	25.9903	25.8816	-16.6915	FALSE	FALSE	12	0.0275979	5.1793	4.64286	0.00671265
752	105	32	I	40	0	168	107	4.46	3.82	1	lalt	TRUE	0.695249	1	0	FALSE	7.7605	-4.33531	12.7253	FALSE	FALSE	14	0.072697	3.78196	4.62855	0.00621122
753	105	33	T	80	3	121	112	4.13	3.84	1	lalt	TRUE	0.527361	1	0	FALSE	-10.056	-24.1711	11.1778	FALSE	FALSE	33	0.0834017	3.58378	4.61208	0.00305155
754	105	34	A	20	0	168	107	5.03	4.36	0	ralt	TRUE	0.498479	1	0.104	FALSE	4.7746	0.878294	-3.10469	FALSE	FALSE	2	0.00727763	7.10232	4.6343	0.014083
755	105	35	I	40	0	168	107	3.98	3.66	1	lalt	TRUE	0.929465	1	0	FALSE	4.60861	-17.9793	-7.4934	FALSE	FALSE	14	0.0837098	3.57846	4.61818	0.0138458
756	105	36	I	40	157	193	131	3.88	4.56	0	lalt	FALSE	1.00258	1	0.114857	FALSE	14.0766	14.1799	-2.05802	FALSE	FALSE	13	0.0209644	5.57592	4.62599	0.00647164
757	105	37	D	40	157	193	131	4.83	5.29	1	lalt	TRUE	0.934548	1	0.0908571	FALSE	0.0863667	20.9524	-9.485	FALSE	FALSE	7	0.0540191	4.21039	4.61822	0.00712254
758	105	38	R	80	138	154	91	4.58	3.5	1	ralt	FALSE	0.938543	1	0.110857	FALSE	12.5902	29.947	-30.8124	FALSE	FALSE	28	0.0770015	3.69897	4.6045	0.00333033
759	105	39	T	80	3	121	112	5.45	4.25	1	lalt	TRUE	0.753627	1	0	FALSE	-14.9795	-17.8732	29.763	FALSE	FALSE	33	0.0900629	3.47292	4.58839	0.00240805
760	105	40	R	80	157	193	131	5.32	3.76	0	ralt	TRUE	1.27756	1	0.107714	FALSE	-8.68568	-2.3969	2.46913	FALSE	FALSE	25	0.00148957	9.39089	4.62195	0.0297669
761	105	41	D	40	157	193	131	5.34	5.46	1	lalt	TRUE	1.48551	1	0	FALSE	-7.08213	-8.02106	-8.79738	FALSE	FALSE	7	0.0642	3.96128	4.61184	0.0298416
762	105	42	T	80	3	121	112	5.02	4.46	1	lalt	TRUE	0.736386	1	0.501714	TRUE	-10.4837	13.1591	-10.3285	FALSE	FALSE	33	0.0994194	3.33033	4.5946	0.00239341
763	105	43	A	20	76	154	68	4.35	5.26	0	lalt	FALSE	0.861376	1	0.118571	FALSE	4.36552	-6.49906	27.3689	FALSE	FALSE	0	0.0128971	6.27681	4.60888	0.00752075
764	105	44	T	80	3	121	112	3.94	3.71	1	lalt	TRUE	0.393366	1	0.115143	FALSE	14.0464	41.9826	-16.2793	FALSE	FALSE	33	0.109434	3.19187	4.59052	0.00731216
765	105	45	O	20	76	154	68	4.17	5.29	1	lalt	TRUE	0.841498	1	0	FALSE	18.4149	4.04975	4.95429	FALSE	FALSE	18	0.0621943	4.00707	4.58187	0.00217331
766	105	46	O	20	76	154	68	4.45	4.52	1	lalt	TRUE	0.500417	1	0	FALSE	8.37954	6.47658	-5.54462	FALSE	FALSE	18	0.0736309	3.76354	4.57075	0.0057088
767	105	47	A	20	76	154	68	3.58	5.41	0	ralt	TRUE	1.0445	1	0	FALSE	0.864055	19.6217	-15.1219	FALSE	FALSE	0	0.0243237	5.36149	4.57658	0.00462036
768	105	48	T	80	75	124	89	5.37	4.9	0	lalt	FALSE	1.50547	1	0.106571	FALSE	-5.26832	-6.42711	17.6955	FALSE	FALSE	35	0.0146002	6.09787	4.58902	0.0087975
769	105	49	A	20	75	124	89	4.57	4.24	1	lalt	TRUE	0.968369	1	0.105429	FALSE	14.1244	9.61637	-5.64831	FALSE	FALSE	5	0.0683685	3.87052	4.5794	0.00646649
770	105	50	R	80	76	154	68	4.38	5.08	0	ralt	TRUE	0.605416	1	0.0917143	FALSE	10.3634	29.4062	-14.8751	FALSE	FALSE	24	0.0039491	7.98426	4.60473	0.0148667
771	105	51	O	20	0	168	107	4.77	4.33	0	ralt	TRUE	1.08537	1	0.106	FALSE	7.08342	15.8867	2.19986	FALSE	FALSE	20	0.0199523	5.6473	4.61266	0.0173772
772	105	52	D	40	76	154	68	4.58	4.85	0	lalt	FALSE	1.58326	1	0.123429	FALSE	-3.12277	-10.855	10.1992	FALSE	FALSE	6	0.0158662	5.9779	4.62332	0.00836604
773	105	53	I	40	0	168	107	3.86	4.23	1	lalt	TRUE	0.965284	1	0	FALSE	12.5611	-4.58999	-0.652693	FALSE	FALSE	14	0.0780157	3.68009	4.61182	0.00545789
774	105	54	R	80	138	154	91	3.86	3.89	1	lalt	TRUE	0.997363	1	0.243429	FALSE	13.1225	12.8616	1.29477	FALSE	FALSE	28	0.0744235	3.7481	4.60129	0.00186544
775	105	55	D	40	157	193	131	5	3.5	1	lalt	TRUE	1.83341	1	0	FALSE	1.96104	3.61613	-21.5021	FALSE	FALSE	7	0.065312	3.93651	4.5929	0.00202131
776	105	56	D	40	138	154	91	5.16	3.79	0	ralt	TRUE	1.37942	1	0.119714	FALSE	-2.01415	11.7971	14.4472	FALSE	FALSE	10	0.00676784	7.20709	4.6125	0.00949668
777	105	57	I	40	76	154	68	4.32	3.9	0	ralt	TRUE	1.29641	1	0	FALSE	21.6217	10.1945	-16.4702	FALSE	FALSE	12	0.030635	5.02867	4.61458	0.0105992
778	105	58	A	20	75	124	89	4.98	4.46	1	lalt	TRUE	0.442513	1	0	FALSE	-2.75748	-15.9222	-28.9805	FALSE	FALSE	5	0.0724609	3.78665	4.60488	0.00313832
779	105	59	I	40	0	168	107	4.18	4.74	1	lalt	TRUE	1.03848	1	0	FALSE	6.69913	1.73384	-20.3325	FALSE	FALSE	14	0.0836147	3.5801	4.59338	0.0016439
780	105	60	R	80	138	154	91	5.17	3.59	1	ralt	FALSE	1.11541	2	0.115143	FALSE	-2.45145	-13.5425	35.4111	FALSE	FALSE	28	0.0801887	3.64046	4.58271	0.00151498
781	105	61	T	80	3	121	112	4.21	5.24	1	lalt	TRUE	0.564459	2	0.122	FALSE	-21.0596	-46.1939	19.7203	FALSE	FALSE	33	0.100564	3.31381	4.5691	0.00134271
782	105	62	R	80	138	154	91	4.67	4.61	1	lalt	TRUE	1.27441	2	0	FALSE	9.56605	-21.1487	2.64302	FALSE	FALSE	28	0.0887563	3.49401	4.55751	0.00123156
783	105	63	I	40	0	168	107	3.6	4.15	1	lalt	TRUE	0.614423	2	0.143143	FALSE	24.7604	28.3407	-34.3056	FALSE	FALSE	14	0.0903373	3.46853	4.54592	0.00128488
784	105	64	R	80	138	154	91	4.87	4.74	1	lalt	TRUE	0.43859	2	0	FALSE	8.65743	4.27083	5.4718	FALSE	FALSE	28	0.0969811	3.36615	4.53359	0.00119609
785	105	65	R	80	157	193	131	4.71	3.93	0	ralt	TRUE	2.29142	2	0	FALSE	3.1922	16.9217	-2.91309	FALSE	FALSE	25	0.0110219	6.50349	4.54796	0.00543821
786	105	66	R	80	138	154	91	4.68	4.9	1	lalt	TRUE	0.811477	2	0	FALSE	-5.91851	6.30924	-5.9086	FALSE	FALSE	28	0.104883	3.25314	4.53482	0.00532477
787	105	67	O	20	75	124	89	3.85	4.31	0	ralt	TRUE	1.21539	2	0.116286	FALSE	12.479	8.72635	5.90541	FALSE	FALSE	23	0.017952	5.79971	4.54384	0.00357271
788	105	68	D	40	157	193	131	3.96	3.81	1	lalt	TRUE	0.527437	2	0	FALSE	4.93533	25.9222	-5.89715	FALSE	FALSE	7	0.0667634	3.9048	4.53687	0.0038633
789	105	69	A	20	0	168	107	4.3	5.21	0	ralt	TRUE	1.78256	2	0	FALSE	-20.9188	-20.8417	5.89074	FALSE	FALSE	2	0.0143756	6.12024	4.54813	0.00442712
790	105	70	A	20	138	154	91	4.64	5.26	0	ralt	TRUE	0.937496	2	0.114857	FALSE	1.97861	17.7813	-25.2943	FALSE	FALSE	4	0.0185119	5.7554	4.55651	0.00642737
791	105	71	D	40	157	193	131	3.92	3.73	1	lalt	TRUE	0.61437	2	0	FALSE	-9.73799	-8.33123	-7.8903	FALSE	FALSE	7	0.0742373	3.75171	4.54831	0.00349628
792	105	72	O	20	76	154	68	4.84	4.42	1	lalt	TRUE	0.830616	2	0	FALSE	-9.8768	-12.1514	23.4287	FALSE	FALSE	18	0.0651642	3.93978	4.54189	0.00145306
793	105	73	D	40	0	168	107	5.09	4.5	0	ralt	TRUE	0.329651	2	0	FALSE	-4.65171	-10.5817	12.2076	FALSE	FALSE	8	0.00778951	7.00425	4.55857	0.00640853
794	105	74	O	20	76	154	68	3.61	3.96	1	lalt	TRUE	0.447574	2	0	FALSE	3.82374	13.6722	-10.7368	FALSE	FALSE	18	0.0730703	3.77457	4.55079	0.00624737
795	105	75	D	40	75	124	89	4.85	4.4	0	ralt	TRUE	0.43575	2	0	FALSE	13.2224	-1.03927	-4.15921	FALSE	FALSE	11	0.0146184	6.09607	4.56131	0.003876
796	105	76	I	40	0	168	107	3.75	5.11	1	lalt	TRUE	0.635826	2	0	FALSE	-0.597597	4.02759	-17.129	FALSE	FALSE	14	0.0887803	3.49362	4.5513	0.00370209
797	105	77	R	80	3	121	112	3.6	5.47	0	lalt	FALSE	1.84977	2	0.124286	FALSE	5.01356	6.22753	18.9778	FALSE	FALSE	27	0.0207046	5.5939	4.55811	0.00277646
798	105	78	A	20	3	121	112	5.29	5.42	0	ralt	TRUE	0.615902	2	0	FALSE	-3.8227	-2.42266	-8.40784	FALSE	FALSE	3	0.0162198	5.9461	4.56733	0.00505009
799	105	79	A	20	0	168	107	5.26	5.36	0	ralt	TRUE	0.841788	2	0	FALSE	-10.0712	8.32689	-7.11158	FALSE	FALSE	2	0.0218212	5.51813	4.57338	0.00486656
800	105	80	A	20	75	124	89	4.67	4.09	1	lalt	TRUE	1.05254	2	0	FALSE	-5.48822	-19.8448	4.99541	FALSE	FALSE	5	0.067339	3.89241	4.56685	0.00272762
801	105	81	T	80	157	193	131	4.7	4.12	0	ralt	TRUE	0.44271	2	0	FALSE	-12.8618	-29.838	-0.898585	FALSE	FALSE	31	0.00999839	6.64409	4.58035	0.00470468
802	105	82	I	40	0	168	107	4.84	4.51	1	lalt	TRUE	0.582652	2	0.285429	FALSE	21.1427	26.3938	-19.8904	FALSE	FALSE	14	0.0927406	3.43065	4.5702	0.00445981
803	105	83	A	20	138	154	91	4.97	3.54	0	ralt	TRUE	0.875725	2	0.106571	FALSE	13.1242	-6.96375	33.1685	FALSE	FALSE	4	0.024893	5.32812	4.57473	0.00216374
804	105	84	D	40	3	121	112	5.4	5.32	0	ralt	TRUE	0.357814	2	0.120286	FALSE	-10.1983	-31.7011	16.9397	FALSE	FALSE	9	0.00471698	7.72792	4.59376	0.00869701
805	105	85	T	80	3	121	112	3.67	4.84	1	lalt	TRUE	0.301649	2	0	FALSE	-26.3694	-9.00087	9.44644	FALSE	FALSE	33	0.088882	3.49197	4.58425	0.00735782
806	105	86	T	80	3	121	112	4.96	5.09	1	lalt	TRUE	0.655729	2	0	FALSE	-9.46182	-14.4855	3.3932	FALSE	FALSE	33	0.0963501	3.37557	4.57398	0.00186453
807	105	87	D	40	75	124	89	4.25	3.89	0	ralt	TRUE	0.606766	2	0	FALSE	2.60144	3.63068	-37.5393	FALSE	FALSE	11	0.0213223	5.55149	4.57993	0.00227184
808	105	88	I	40	3	121	112	5.09	4.51	0	ralt	TRUE	0.711828	2	0.101714	FALSE	-3.88308	-29.8563	3.26251	FALSE	FALSE	15	0.0139988	6.15855	4.58978	0.00460138
809	105	89	I	40	75	124	89	4.27	4.28	0	ralt	TRUE	1.02582	2	0	FALSE	-11.9586	-7.96226	-17.8697	FALSE	FALSE	17	0.00226415	8.78681	4.61239	0.0133718
810	105	90	T	80	0	168	107	4.72	4.74	0	missing	FALSE		2	0.086	FALSE	3.89156	-5.66948	22.4485	TRUE	TRUE	32	0.00269542	8.53528	4.6338	0.0200124
811	105	91	O	20	76	154	68	4.18	5.03	1	ralt	FALSE	1.61964	2	0.126571	FALSE	-7.01488	-24.9729	14.2722	FALSE	FALSE	18	0.0711633	3.81272	4.62682	0.00987316
812	105	92	R	80	138	154	91	5.01	3.9	1	lalt	TRUE	0.992529	2	0	FALSE	-27.0779	-22.8015	20.5244	FALSE	FALSE	28	0.0913915	3.4518	4.61729	0.000886828
813	105	93	I	40	76	154	68	3.9	4.07	0	lalt	FALSE	0.891543	2	0	FALSE	14.8937	19.0937	-3.06182	FALSE	FALSE	12	0.0298376	5.06672	4.61946	0.00161969
814	105	94	I	40	138	154	91	4.81	3.7	0	ralt	TRUE	0.435791	2	0	FALSE	16.7489	10.9551	11.9833	FALSE	FALSE	16	0.00522496	7.58036	4.63638	0.00687658
815	105	95	O	20	76	154	68	4.25	3.61	1	lalt	TRUE	0.923736	2	0	FALSE	3.67715	21.1154	-44.605	FALSE	FALSE	18	0.0766239	3.70606	4.62885	0.00604231
816	105	96	T	80	3	121	112	5.41	3.68	1	lalt	TRUE	0.200853	2	0.127143	FALSE	-5.22247	0.316016	-28.2662	FALSE	FALSE	33	0.0966266	3.37144	4.61902	0.000772988
817	105	97	D	40	138	154	91	5.12	4.08	0	ralt	TRUE	0.92399	2	0	FALSE	0.287758	-10.1083	-6.37808	FALSE	FALSE	10	0.0122003	6.35694	4.62924	0.00303977
818	105	98	R	80	138	154	91	4.73	4.37	1	lalt	TRUE	1.31686	2	0	FALSE	-12.2649	-40.5914	23.7172	FALSE	FALSE	28	0.094762	3.39955	4.61976	0.00302024
819	105	99	I	40	75	124	89	5.22	4.86	0	lalt	FALSE	0.662884	2	0	FALSE	9.66171	8.57781	18.7084	FALSE	FALSE	17	0.00950384	6.71727	4.63187	0.00359819
820	105	100	A	20	75	124	89	4.35	4.75	1	lalt	TRUE	0.555829	2	0	FALSE	13.6948	21.993	-21.9633	FALSE	FALSE	5	0.0647891	3.9481	4.62634	0.00374506
821	105	101	T	80	3	121	112	4.86	4.55	1	lalt	TRUE	0.27587	2	0	FALSE	3.56998	22.0153	17.136	FALSE	FALSE	33	0.100399	3.31618	4.61652	0.000790128
822	105	102	R	80	0	168	107	4.9	5.19	0	ralt	TRUE	0.843972	2	0	FALSE	7.88489	34.6411	-23.0044	FALSE	FALSE	26	0.00205086	8.92955	4.63784	0.00996602
823	105	103	D	40	0	168	107	4.54	3.98	0	ralt	TRUE	0.743905	2	0	FALSE	-12.6206	5.20149	-5.3701	FALSE	FALSE	8	0.0133026	6.23215	4.64687	0.0119176
824	105	104	A	20	75	124	89	5.12	3.52	1	lalt	TRUE	0.383874	2	0	FALSE	-8.85048	-22.7973	19.0031	FALSE	FALSE	5	0.0700809	3.83484	4.64065	0.00272859
825	105	105	D	40	3	121	112	4.04	4.95	0	ralt	TRUE	0.310004	2	0	FALSE	-10.6715	26.5617	-14.8233	FALSE	FALSE	9	0.0111067	6.49243	4.65101	0.00307072
826	105	106	D	40	76	154	68	4.88	4.42	0	ralt	TRUE	0.93603	2	0	FALSE	-9.47358	-8.14971	23.7237	FALSE	FALSE	6	0.0168748	5.88898	4.65784	0.00441414
827	105	107	D	40	157	193	131	5.1	3.57	1	lalt	TRUE	0.600985	2	0	FALSE	9.14971	7.46536	-1.90143	FALSE	FALSE	7	0.0625412	3.99905	4.65276	0.00224835
828	105	108	T	80	138	154	91	4.92	4.65	0	ralt	TRUE	0.465124	2	0	FALSE	-2.36014	-8.21957	-13.4318	FALSE	FALSE	34	0.00235849	8.72792	4.67256	0.00873961
829	105	109	I	40	138	154	91	5.27	4.04	0	ralt	TRUE	0.469109	2	0.0988571	FALSE	-14.6978	12.8335	14.4474	FALSE	FALSE	16	0.011581	6.4321	4.68216	0.0106351
830	105	110	D	40	157	193	131	3.95	3.93	1	lalt	TRUE	0.59303	2	0	FALSE	-32.0689	-43.8261	23.2507	FALSE	FALSE	7	0.0681055	3.87609	4.67623	0.00281342
831	105	111	I	40	0	168	107	3.98	4.5	1	lalt	TRUE	0.545211	2	0	FALSE	20.046	18.0291	-25.1936	FALSE	FALSE	14	0.0812476	3.62153	4.66874	0.000738745
832	105	112	R	80	75	124	89	4.04	4.64	0	ralt	TRUE	0.590391	2	0	FALSE	3.26948	-21.5233	-4.23335	FALSE	FALSE	29	0.00152983	9.35241	4.68982	0.010643
833	105	113	O	20	76	154	68	3.96	4.68	1	missing	FALSE		2	0	FALSE	8.83475	12.3451	29.3933	TRUE	TRUE	18	0.0740788	3.7548	4.6832	0.0106042
834	105	114	A	20	76	154	68	3.62	3.72	0	lalt	FALSE	1.02622	2	0.116286	FALSE	14.7761	-8.50554	6.62603	FALSE	FALSE	0	0.0201258	5.63481	4.6881	0.00172453
835	105	115	O	20	157	193	131	5.02	4.2	0	ralt	TRUE	1.06146	2	0.103429	FALSE	16.6423	-28.5931	17.3099	FALSE	FALSE	19	0.00487317	7.68092	4.70317	0.00594495
836	105	116	A	20	75	124	89	5.02	3.69	1	lalt	TRUE	0.612371	2	0.137143	FALSE	-0.86141	-18.1122	9.17534	FALSE	FALSE	5	0.0711271	3.81346	4.69697	0.00491695
837	105	117	D	40	3	121	112	4.94	3.51	0	ralt	TRUE	0.827511	2	0	FALSE	10.9031	7.60344	-22.2875	FALSE	FALSE	9	0.0167715	5.89785	4.70317	0.00192364
838	105	118	R	80	138	154	91	4.46	4.17	1	ralt	FALSE	0.742586	2	0	FALSE	6.32296	1.49756	-10.2717	FALSE	FALSE	28	0.0889488	3.49088	4.69505	0.00182602
839	105	119	O	20	0	168	107	4.28	3.94	0	ralt	TRUE	0.721608	2	0	FALSE	4.73912	27.8764	-37.5854	FALSE	FALSE	20	0.0176506	5.82414	4.7008	0.00172526
840	105	120	A	20	75	124	89	5.22	4.6	1	lalt	TRUE	0.494295	3	0	FALSE	23.448	31.048	-12.7015	FALSE	FALSE	5	0.0757136	3.7233	4.69422	0.00176596
841	105	121	T	80	3	121	112	5.38	3.7	1	lalt	TRUE	0.241203	3	0	FALSE	16.1629	-6.31633	5.06736	FALSE	FALSE	33	0.0939791	3.41152	4.68583	0.000562162
842	105	122	I	40	75	124	89	5.1	4.12	0	ralt	TRUE	1.11033	3	0	FALSE	3.12064	-6.68397	-8.59438	FALSE	FALSE	17	0.0144495	6.11284	4.69309	0.00193327
843	105	123	I	40	157	193	131	4.62	4.11	0	ralt	TRUE	0.85136	3	0	FALSE	22.0815	2.07523	-0.228098	FALSE	FALSE	13	0.0157826	5.98552	4.6996	0.00321951
844	105	124	R	80	138	154	91	5.16	5.22	1	ralt	FALSE	0.647382	3	0	FALSE	6.57485	-7.66977	-19.5777	FALSE	FALSE	28	0.0918632	3.44437	4.69153	0.00177246
845	105	125	R	80	138	154	91	4.42	4.46	1	lalt	TRUE	0.780197	3	0	FALSE	-13.2685	-38.3122	-2.47068	FALSE	FALSE	28	0.0975038	3.3584	4.68305	0.00104943
846	105	126	I	40	0	168	107	4.02	4.31	1	lalt	TRUE	0.247274	3	0	FALSE	-22.1076	-16.1367	2.72177	FALSE	FALSE	14	0.0798975	3.64571	4.67638	0.000500038
847	105	127	O	20	76	154	68	4.56	4.87	1	lalt	TRUE	0.459384	3	0	FALSE	0.0701351	-16.4273	21.4552	FALSE	FALSE	18	0.0738511	3.75924	4.67046	0.000578906
848	105	128	I	40	0	168	107	5.41	3.71	1	lalt	TRUE	0.517355	3	0	FALSE	11.719	25.1511	8.34852	FALSE	FALSE	14	0.0850207	3.55604	4.66343	0.00055297
849	105	129	R	80	138	154	91	5.2	5.4	1	lalt	TRUE	0.702407	3	0	FALSE	7.75768	-0.380869	8.94179	FALSE	FALSE	28	0.101201	3.30471	4.65501	0.00045409
850	105	130	A	20	75	124	89	5.19	4.44	1	lalt	TRUE	1.24924	3	0	FALSE	5.17447	-26.9454	-0.677678	FALSE	FALSE	5	0.0771766	3.69569	4.64896	0.000478084
851	105	131	R	80	76	154	68	5.38	4.78	0	ralt	TRUE	0.672338	3	0	FALSE	3.37868	3.18932	-1.19474	FALSE	FALSE	24	0.00802169	6.96188	4.66014	0.00283926
852	105	132	T	80	3	121	112	4.62	4.14	1	lalt	TRUE	0.505168	3	0	FALSE	-8.65507	-7.00489	8.60495	FALSE	FALSE	33	0.0937781	3.41461	4.65253	0.00276361
853	105	133	R	80	138	154	91	4.13	5.14	1	lalt	TRUE	0.477222	3	0	FALSE	10.7486	20.1815	0.761733	FALSE	FALSE	28	0.104723	3.25536	4.6441	0.000398539
854	105	134	D	40	157	193	131	4.76	3.54	1	lalt	TRUE	0.709224	3	0.130857	FALSE	-10.5383	4.02451	-12.4969	FALSE	FALSE	7	0.0643729	3.9574	4.63974	0.000508777
855	105	135	T	80	3	121	112	4.63	5.17	1	lalt	TRUE	0.147356	3	0	FALSE	12.8408	0.416787	13.3173	FALSE	FALSE	33	0.0979808	3.35136	4.63203	0.000519246
856	105	136	A	20	76	154	68	3.53	5.24	0	ralt	TRUE	0.284479	3	0	FALSE	-19.8394	-18.5966	-1.38223	FALSE	FALSE	0	0.0233655	5.41948	4.63564	0.00110769
857	105	137	T	80	0	168	107	4.9	4.43	0	ralt	TRUE	0.364526	3	0	FALSE	9.99858	-5.49121	-11.1901	FALSE	FALSE	32	0.00774348	7.0128	4.6468	0.00338459
858	105	138	O	20	76	154	68	3.82	4.7	1	lalt	TRUE	0.662364	3	0	FALSE	-8.37787	12.822	17.1135	FALSE	FALSE	18	0.0749295	3.73832	4.64133	0.00272436
859	105	139	O	20	3	121	112	4.13	5.21	0	ralt	TRUE	0.838595	3	0	FALSE	12.9971	-5.46988	3.81993	FALSE	FALSE	21	0.00991914	6.65557	4.65079	0.00221828
860	105	140	I	40	3	121	112	3.92	4.53	0	ralt	TRUE	0.682596	3	0	FALSE	20.9712	5.24908	1.48424	FALSE	FALSE	15	0.0155446	6.00744	4.65714	0.00323683
861	105	141	R	80	138	154	91	4.61	3.52	1	lalt	TRUE	0.723553	3	0	FALSE	5.33061	33.2561	-8.73039	FALSE	FALSE	28	0.105639	3.24278	4.649	0.00144915
862	105	142	O	20	76	154	68	5.18	5.05	1	lalt	TRUE	0.672669	3	0	FALSE	7.08999	-2.88871	-8.08859	FALSE	FALSE	18	0.0788637	3.6645	4.64325	0.000401541
863	105	143	T	80	3	121	112	3.82	4.26	1	lalt	TRUE	0.258618	3	0	FALSE	-9.56418	10.872	-5.30706	FALSE	FALSE	33	0.0991884	3.33369	4.63577	0.000410803
864	105	144	R	80	138	154	91	3.87	4.47	1	lalt	TRUE	0.291753	3	0	FALSE	11.2096	2.37967	-8.869	FALSE	FALSE	28	0.109434	3.19187	4.62762	0.000330621
865	105	145	O	20	157	193	131	3.54	5.13	0	ralt	TRUE	0.649948	3	0	FALSE	1.83095	25.9541	-4.9843	FALSE	FALSE	19	0.00959033	6.7042	4.63711	0.00204954
866	105	146	I	40	0	168	107	3.57	4.68	1	lalt	TRUE	0.54989	3	0	FALSE	-6.79324	7.34509	21.1994	FALSE	FALSE	14	0.0821066	3.60636	4.63124	0.0021001
867	105	147	A	20	75	124	89	4.2	5.26	1	lalt	TRUE	0.445013	3	0	FALSE	16.7472	9.2674	9.99913	FALSE	FALSE	5	0.0754717	3.72792	4.62608	0.000448075
868	105	148	T	80	75	124	89	4.51	3.63	0	lalt	FALSE	0.23597	3	0	FALSE	-22.6985	-27.138	11.5428	FALSE	FALSE	35	0.0121001	6.36884	4.63398	0.00172657
869	105	149	O	20	157	193	131	3.55	5.22	0	ralt	TRUE	0.540238	3	0	FALSE	3.27751	23.8243	-25.3027	FALSE	FALSE	19	0.0147884	6.07939	4.6405	0.00271431
870	105	150	T	80	76	154	68	3.59	4.82	0	ralt	TRUE	0.982262	3	0	FALSE	-12.4081	-2.3969	-11.0736	FALSE	FALSE	30	0.00628931	7.31288	4.65219	0.0038079
871	105	151	A	20	3	121	112	4.97	3.91	0	ralt	TRUE	0.629377	3	0	FALSE	22.1022	17.5096	3.87108	FALSE	FALSE	3	0.0152356	6.03641	4.65836	0.00374288
872	105	152	D	40	0	168	107	4.05	4.61	0	ralt	TRUE	1.23935	3	0	FALSE	-10.7536	3.68282	-27.2324	FALSE	FALSE	8	0.0151546	6.0441	4.66451	0.00233002
873	105	153	A	20	157	193	131	4.7	5.27	0	ralt	TRUE	0.325439	3	0	FALSE	36.3049	60.7238	-17.255	FALSE	FALSE	1	0.00978337	6.67545	4.67335	0.00287804
874	105	154	D	40	76	154	68	3.64	4.77	0	ralt	TRUE	0.616383	3	0	FALSE	13.0127	8.66934	28.8269	FALSE	FALSE	6	0.0178749	5.80592	4.67828	0.00268691
875	105	155	D	40	157	193	131	4.85	4.18	1	lalt	TRUE	0.262392	3	0	FALSE	-16.7791	-9.15174	32.212	FALSE	FALSE	7	0.0625309	3.99929	4.67446	0.0012386
876	105	156	R	80	138	154	91	4.44	4.26	1	lalt	TRUE	0.6814	3	0	FALSE	24.9468	37.4911	-36.6665	FALSE	FALSE	28	0.107803	3.21354	4.66673	0.000404286
877	105	157	A	20	75	124	89	4.77	5.18	1	lalt	TRUE	0.317504	3	0	FALSE	-0.638093	-9.49576	-10.4031	FALSE	FALSE	5	0.0767426	3.70383	4.66154	0.000345199
878	105	158	O	20	76	154	68	5.46	4.23	1	lalt	TRUE	0.625416	3	0.224	FALSE	3.81973	-20.428	-3.80314	FALSE	FALSE	18	0.0775141	3.6894	4.65634	0.000408631
879	105	159	A	20	0	168	107	4.55	4.92	0	ralt	TRUE	0.494551	3	0.117143	FALSE	7.87344	-2.48511	7.42515	FALSE	FALSE	2	0.0179971	5.79609	4.66121	0.00112511
880	105	160	A	20	157	193	131	3.93	3.59	0	ralt	TRUE	0.9785	3	0.132286	FALSE	25.2112	38.7018	-14.6115	FALSE	FALSE	1	0.014536	6.10423	4.66739	0.00203823
881	105	161	I	40	75	124	89	5.2	4.27	0	ralt	TRUE	0.516679	3	0.122	FALSE	-17.4899	-14.4452	6.93051	FALSE	FALSE	17	0.0166651	5.90703	4.67266	0.00208836
882	105	162	R	80	0	168	107	4.72	5.27	0	ralt	TRUE	0.307676	3	0.132857	FALSE	-7.73102	-28.8626	16.1062	FALSE	FALSE	26	0.00647989	7.26981	4.68344	0.00322162
883	105	163	I	40	0	168	107	4.32	5.43	1	lalt	TRUE	0.526703	3	0	FALSE	13.8177	29.7723	13.7336	FALSE	FALSE	14	0.0801176	3.64174	4.67803	0.00242605
884	105	164	T	80	0	168	107	3.78	4.61	0	ralt	TRUE	0.406634	3	0.123714	FALSE	-15.4534	0.108821	-14.5542	FALSE	FALSE	32	0.0116981	6.41758	4.68535	0.00150136
885	105	165	I	40	0	168	107	4.87	3.79	1	lalt	TRUE	0.484627	3	0	FALSE	-13.2933	-36.8492	30.9387	FALSE	FALSE	14	0.0842955	3.5684	4.67963	0.00148158
886	105	166	R	80	75	124	89	4.03	5.01	0	ralt	TRUE	0.286823	3	0.114857	FALSE	3.21601	18.2661	-9.67724	FALSE	FALSE	29	0.00607136	7.36376	4.69054	0.00246348
887	105	167	D	40	157	193	131	4.83	5.25	1	lalt	TRUE	0.406764	3	0.122857	FALSE	1.63933	-11.7971	11.3926	FALSE	FALSE	7	0.0637606	3.97119	4.68677	0.00251346
888	105	168	O	20	157	193	131	4.32	5.15	0	ralt	TRUE	0.437825	3	0	FALSE	13.8694	34.3189	-6.35065	FALSE	FALSE	19	0.018313	5.77099	4.69121	0.00106357
889	105	169	O	20	0	168	107	4.14	4.8	0	ralt	TRUE	0.740823	3	0	FALSE	0.384891	-21.8346	14.4176	FALSE	FALSE	20	0.0182237	5.77804	4.69564	0.00165827
890	105	170	D	40	157	193	131	4.93	5.36	1	lalt	TRUE	0.714723	3	0	FALSE	22.9716	40.155	-14.6024	FALSE	FALSE	7	0.0676864	3.88499	4.69149	0.00103556
891	105	171	T	80	76	154	68	4.92	3.73	0	ralt	TRUE	0.293736	3	0.117143	FALSE	10.989	17.6809	-8.71153	FALSE	FALSE	30	0.0104822	6.57592	4.69917	0.00157319
892	105	172	O	20	76	154	68	4.41	4.71	1	lalt	TRUE	0.469761	3	0.148	FALSE	24.0378	18.7152	0.193867	FALSE	FALSE	18	0.0771045	3.69704	4.69418	0.00153503
893	105	173	O	20	76	154	68	4.55	3.53	1	lalt	TRUE	0.308792	3	0.133429	FALSE	-7.7029	0.477926	5.70707	FALSE	FALSE	18	0.0815203	3.6167	4.68887	0.000757334
894	105	174	O	20	138	154	91	3.81	4.12	0	ralt	TRUE	0.748992	3	0.133714	FALSE	13.3151	10.613	-11.2818	FALSE	FALSE	22	0.0185984	5.74868	4.6931	0.000940542
895	105	175	I	40	0	168	107	5.24	4.66	1	lalt	TRUE	0.324032	3	0	FALSE	17.7674	-13.2629	8.18892	FALSE	FALSE	14	0.0850398	3.55572	4.68757	0.000926702
896	105	176	O	20	76	154	68	4.04	4.5	1	lalt	TRUE	0.322025	3	0	FALSE	23.5722	10.4625	0.197989	FALSE	FALSE	18	0.0850837	3.55497	4.68208	0.000305702
897	105	177	R	80	138	154	91	4.58	4.56	1	lalt	TRUE	0.813071	3	0	FALSE	24.0382	14.6521	-8.099	FALSE	FALSE	28	0.101869	3.29521	4.67546	0.000273129
898	105	178	I	40	0	168	107	4.8	4.92	1	lalt	TRUE	0.506088	3	0	FALSE	-13.98	15.3745	-25.4298	FALSE	FALSE	14	0.0885205	3.49784	4.66983	0.000263569
899	105	179	D	40	157	193	131	4.44	3.94	1	lalt	TRUE	0.23917	3	0.135143	FALSE	-13.6695	22.5326	-40.4584	FALSE	FALSE	7	0.0695042	3.84676	4.66581	0.000329698
900	105	180	O	20	76	154	68	4.46	4.95	1	lalt	TRUE	0.655056	4	0	FALSE	5.04815	21.3991	18.7035	FALSE	FALSE	18	0.0881377	3.5041	4.6603	0.000327625
901	105	181	T	80	75	124	89	5.23	4.68	0	ralt	TRUE	0.543134	4	0	FALSE	4.07435	-11.3935	7.55151	FALSE	FALSE	35	0.0148683	6.07162	4.66586	0.00104326
902	105	182	I	40	157	193	131	4.55	5.05	0	ralt	TRUE	0.339153	4	0	FALSE	14.0247	34.6161	-8.7676	FALSE	FALSE	13	0.0160983	5.95695	4.67091	0.001729
903	105	183	A	20	75	124	89	4.73	4.9	1	lalt	TRUE	0.292046	4	0.138286	FALSE	7.81285	9.68813	-8.70249	FALSE	FALSE	5	0.0721978	3.7919	4.66673	0.000999534
904	105	184	D	40	157	193	131	3.88	3.6	1	lalt	TRUE	0.262057	4	0	FALSE	-4.52844	12.4152	-8.30345	FALSE	FALSE	7	0.07247	3.78647	4.66256	0.000343354
905	105	185	D	40	157	193	131	5.19	4.22	1	lalt	TRUE	0.279254	4	0	FALSE	9.24149	8.94329	-1.26789	FALSE	FALSE	7	0.076667	3.70525	4.65807	0.000724214
906	105	186	A	20	75	124	89	4.34	3.76	1	lalt	TRUE	0.302265	4	0	FALSE	8.59493	-7.21113	-1.41213	FALSE	FALSE	5	0.0757267	3.72305	4.6537	0.000317603
907	105	187	D	40	157	193	131	3.62	5.11	1	lalt	TRUE	0.517289	4	0	FALSE	17.2961	38.8188	-18.2027	FALSE	FALSE	7	0.0804637	3.63552	4.649	0.000306242
908	105	188	O	20	3	121	112	3.86	4.21	0	ralt	TRUE	0.412551	4	0	FALSE	-3.15531	14.8737	-0.390632	FALSE	FALSE	21	0.0122136	6.35537	4.65554	0.00116865
909	105	189	T	80	3	121	112	3.83	4.85	1	lalt	TRUE	0.192527	4	0	FALSE	-3.13869	28.801	-9.10887	FALSE	FALSE	33	0.0833543	3.5846	4.65065	0.00115631
910	105	190	T	80	76	154	68	4.07	5.27	0	ralt	TRUE	0.360894	4	0	FALSE	6.09701	4.49492	11.2066	FALSE	FALSE	30	0.0140257	6.15578	4.65639	0.00102128
911	105	191	R	80	75	124	89	3.8	4.2	0	ralt	TRUE	0.935761	4	0.113143	FALSE	5.13837	-19.3752	0.879601	FALSE	FALSE	29	0.009808	6.67183	4.66399	0.00209738
912	105	192	T	80	3	121	112	3.52	4	1	lalt	TRUE	1.06873	4	0	FALSE	9.02937	29.5828	-14.7307	FALSE	FALSE	33	0.0866435	3.52876	4.65889	0.00134215
913	105	193	O	20	75	124	89	4.93	4.94	0	ralt	TRUE	0.783986	4	0.123714	FALSE	-10.8978	-4.24245	-11.588	FALSE	FALSE	23	0.0124413	6.32872	4.66518	0.00109205
914	105	194	T	80	0	168	107	3.51	3.52	0	ralt	TRUE	0.35996	4	0.0914286	FALSE	9.64987	6.13331	0.601246	FALSE	FALSE	32	0.0145201	6.1058	4.67057	0.00178568
915	105	195	A	20	75	124	89	3.58	4.13	1	lalt	TRUE	0.28409	4	0	FALSE	-0.445792	-26.7617	25.4217	FALSE	FALSE	5	0.0771053	3.69703	4.66622	0.000967389
916	105	196	D	40	138	154	91	4.32	4.22	0	ralt	TRUE	0.61834	4	0	FALSE	-1.19715	22.2322	-6.88986	FALSE	FALSE	10	0.0113045	6.46696	4.67291	0.00117099
917	105	197	R	80	157	193	131	4.66	4.28	0	ralt	TRUE	1.06638	4	0	FALSE	2.79662	20.49	-2.59486	FALSE	FALSE	25	0.00906956	6.78475	4.68067	0.0022676
918	105	198	O	20	76	154	68	4.44	4.47	1	lalt	TRUE	0.624272	4	0	FALSE	22.65	24.7328	-2.69225	FALSE	FALSE	18	0.0856313	3.54572	4.67571	0.00136405
919	105	199	A	20	3	121	112	5.27	3.84	0	ralt	TRUE	0.305468	4	0	FALSE	12.4336	15.2991	-3.18036	FALSE	FALSE	3	0.016379	5.93201	4.68031	0.000831043
920	105	200	R	80	0	168	107	5.33	3.7	0	ralt	TRUE	0.880484	4	0	FALSE	18.3782	-0.407961	4.72535	FALSE	FALSE	26	0.00967381	6.6917	4.68764	0.00185077
921	105	201	D	40	75	124	89	5.03	5.46	0	ralt	TRUE	1.05447	4	0.0994286	FALSE	17.7118	30.9672	-17.7885	FALSE	FALSE	11	0.0152854	6.0317	4.69253	0.0018851
922	105	202	I	40	0	168	107	4.45	3.92	1	lalt	TRUE	1.01424	4	0	FALSE	-6.95612	15.1937	-12.2475	FALSE	FALSE	14	0.0837958	3.57698	4.68772	0.000863656
923	105	203	R	80	3	121	112	4.32	4.29	0	ralt	TRUE	0.674434	4	0	FALSE	19.0916	31.6537	-18.4742	FALSE	FALSE	27	0.0139733	6.16118	4.69305	0.000919464
924	105	204	T	80	157	193	131	3.86	4.74	0	ralt	TRUE	0.541477	4	0	FALSE	-32.7115	1.12903	24.4443	FALSE	FALSE	31	0.00904088	6.78932	4.70056	0.00197422
925	105	205	O	20	75	124	89	4.48	5.26	0	ralt	TRUE	0.538563	4	0	FALSE	17.2527	20.8833	-3.31193	FALSE	FALSE	23	0.0159712	5.96838	4.7051	0.00186637
926	105	206	R	80	76	154	68	4.62	5.49	0	ralt	TRUE	0.729419	4	0	FALSE	0.884247	29.1189	5.12694	FALSE	FALSE	24	0.00966786	6.69259	4.71217	0.00178175
927	105	207	R	80	138	154	91	4.05	4.69	1	lalt	TRUE	0.549298	4	0	FALSE	17.2876	15.2793	-24.8936	FALSE	FALSE	28	0.0934079	3.42031	4.70676	0.00119398
928	105	208	R	80	138	154	91	4.45	3.64	1	lalt	TRUE	0.313428	4	0	FALSE	-8.93214	8.82592	17.6489	FALSE	FALSE	28	0.0971234	3.36404	4.70117	0.000455924
929	105	209	R	80	0	168	107	3.99	3.62	0	ralt	TRUE	0.504679	4	0	FALSE	-2.70169	17.879	-13.1866	FALSE	FALSE	26	0.0134001	6.22161	4.70654	0.000888288
930	105	210	T	80	157	193	131	5.23	4.25	0	ralt	TRUE	0.322701	4	0.131429	FALSE	13.621	14.8009	-21.4313	FALSE	FALSE	31	0.0128854	6.27812	4.71208	0.00160068
931	105	211	R	80	75	124	89	3.57	4.55	0	ralt	TRUE	0.500831	4	0	FALSE	7.2946	27.4376	-4.53013	FALSE	FALSE	29	0.0130624	6.25844	4.71751	0.00160737
932	105	212	T	80	138	154	91	4.8	4.2	0	ralt	TRUE	0.279974	4	0	FALSE	-15.1139	-35.0942	23.2556	FALSE	FALSE	34	0.0054017	7.53237	4.72706	0.0025352
933	105	213	T	80	3	121	112	4.71	5.38	1	lalt	TRUE	0.330923	4	0	FALSE	-12.4947	4.34198	6.23675	FALSE	FALSE	33	0.0833523	3.58463	4.72237	0.00184808
934	105	214	D	40	0	168	107	4.39	3.6	0	ralt	TRUE	0.391958	4	0	FALSE	-11.1243	13.0282	-4.2428	FALSE	FALSE	8	0.0153962	6.02128	4.72686	0.000779524
935	105	215	I	40	0	168	107	4.83	3.65	1	lalt	TRUE	0.408025	4	0.247143	FALSE	5.14745	-7.13471	-24.7553	FALSE	FALSE	14	0.0834398	3.58312	4.7222	0.000775409
936	105	216	I	40	138	154	91	5.2	3.94	0	ralt	TRUE	0.527212	4	0.126286	FALSE	8.10235	-12.7457	0.222997	FALSE	FALSE	16	0.0106319	6.55545	4.72851	0.00104074
937	105	217	A	20	157	193	131	4.75	4.65	0	ralt	TRUE	0.491242	4	0	FALSE	6.97672	10.7314	-3.30635	FALSE	FALSE	1	0.0152137	6.03849	4.73299	0.00158446
938	105	218	A	20	138	154	91	4.39	3.77	0	ralt	TRUE	0.395259	4	0.120286	FALSE	4.08952	11.2813	8.39947	FALSE	FALSE	4	0.0155995	6.00236	4.73732	0.00129432
939	105	219	T	80	138	154	91	4.57	5.23	0	ralt	TRUE	0.379377	4	0	FALSE	5.00589	6.28047	17.0776	FALSE	FALSE	34	0.00917499	6.76808	4.7442	0.00167574
940	105	220	D	40	3	121	112	4.12	4.82	0	ralt	TRUE	0.350373	4	0	FALSE	17.7426	21.9556	-1.25101	FALSE	FALSE	9	0.0139298	6.16568	4.74902	0.00173643
941	105	221	T	80	138	154	91	5.1	5.25	0	ralt	TRUE	0.345422	4	0	FALSE	-10.3202	-5.55028	3.01822	FALSE	FALSE	34	0.0129946	6.26594	4.75415	0.00144026
942	105	222	D	40	157	193	131	4.7	5.42	1	lalt	TRUE	0.795229	4	0	FALSE	-6.52081	6.18043	-11.8142	FALSE	FALSE	7	0.073424	3.7676	4.75021	0.000862583
943	105	223	D	40	157	193	131	5	4.45	1	lalt	TRUE	0.373186	4	0	FALSE	13.9632	30.522	0.0316419	FALSE	FALSE	7	0.0770015	3.69897	4.74604	0.000523336
944	105	224	D	40	157	193	131	4.13	4.25	1	lalt	TRUE	0.58819	4	0.113429	FALSE	10.5573	-5.01939	-19.2262	FALSE	FALSE	7	0.0805515	3.63394	4.74166	0.000494098
945	105	225	A	20	75	124	89	3.84	5.43	1	lalt	TRUE	0.655269	4	0	FALSE	-0.418783	-0.40671	27.2526	FALSE	FALSE	5	0.072074	3.79438	4.73791	0.000231002
946	105	226	O	20	76	154	68	4.14	5.39	1	lalt	TRUE	0.544279	4	0	FALSE	13.2894	20.2553	-10.3007	FALSE	FALSE	18	0.0802967	3.63852	4.73361	0.000229715
947	105	227	T	80	3	121	112	4.52	4.9	1	lalt	TRUE	0.432286	4	0.124286	FALSE	-7.35318	3.62465	-2.90323	FALSE	FALSE	33	0.0827176	3.59566	4.72919	0.000209977
948	105	228	I	40	138	154	91	3.62	4.72	0	lalt	FALSE	0.661265	4	0	FALSE	15.8341	5.17015	-18.2913	FALSE	FALSE	16	0.0139365	6.16498	4.73393	0.00076262
949	105	229	D	40	157	193	131	5.14	4.91	1	lalt	TRUE	0.519378	4	0	FALSE	1.45065	7.85141	-4.60787	FALSE	FALSE	7	0.0828053	3.59413	4.72954	0.000758868
950	105	230	T	80	3	121	112	4.73	4.02	1	lalt	TRUE	0.219344	4	0.148571	FALSE	-7.06202	-13.9565	-15.9774	FALSE	FALSE	33	0.085544	3.54719	4.725	0.000197642
951	105	231	D	40	138	154	91	3.66	5.18	0	ralt	TRUE	0.794492	4	0	FALSE	5.4465	11.0148	-10.6632	FALSE	FALSE	10	0.0135679	6.20365	4.72985	0.000758958
952	105	232	A	20	75	124	89	4.68	4.6	1	lalt	TRUE	0.948403	4	0	FALSE	7.76623	1.15957	15.707	FALSE	FALSE	5	0.0739228	3.75784	4.72611	0.000773263
953	105	233	A	20	75	124	89	5.25	4.56	1	lalt	TRUE	0.216467	4	0	FALSE	12.6921	27.4899	-9.42482	FALSE	FALSE	5	0.0773655	3.69217	4.72216	0.000482356
954	105	234	O	20	3	121	112	4.93	5.34	0	ralt	TRUE	0.554522	4	0	FALSE	-13.6794	-11.2038	-3.13067	FALSE	FALSE	21	0.0138365	6.17538	4.72688	0.000742693
955	105	235	R	80	76	154	68	5.31	5.08	0	ralt	TRUE	0.512376	4	0	FALSE	13.2611	11.094	6.10235	FALSE	FALSE	24	0.0123233	6.34246	4.7321	0.0013396
956	105	236	R	80	157	193	131	5.18	3.82	0	ralt	TRUE	0.454377	4	0	FALSE	-12.2086	6.76961	19.2591	FALSE	FALSE	25	0.0114456	6.44906	4.73763	0.00145351
957	105	237	I	40	3	121	112	5.04	4.64	0	ralt	TRUE	0.966331	4	0.124286	FALSE	-8.59522	-8.10028	-0.25238	FALSE	FALSE	15	0.0136844	6.19132	4.7423	0.00137779
958	105	238	I	40	0	168	107	5.13	5.38	1	lalt	TRUE	0.54725	4	0	FALSE	37.042	55.7859	-35.5167	FALSE	FALSE	14	0.0800854	3.64232	4.73819	0.000726153
959	105	239	T	80	3	121	112	4.48	4.54	1	ralt	FALSE	1.49522	4	0	FALSE	16.5341	38.2106	-24.7237	FALSE	FALSE	33	0.0863808	3.53315	4.73373	0.000187786
960	106	0	I	20	76	154	68	3.96	3.56	1	lalt	FALSE	0.835285	1	0.127714	FALSE	-5.45076	-14.8639	14.7658	FALSE	FALSE	12	0.0471698	4.40599	4.50712	0.00918485
961	106	1	A	80	138	154	91	4.74	5.13	1	ralt	TRUE	0.644484	1	0.262286	FALSE	3.51408	-8.28246	16.1843	FALSE	FALSE	4	0.123916	3.01256	4.46443	0.0112628
962	106	2	D	40	157	193	131	4.43	5.35	0	ralt	FALSE	1.13747	1	0.121143	FALSE	5.94009	3.45906	-6.16279	FALSE	FALSE	7	0.020854	5.58353	4.47648	0.0189325
963	106	3	D	40	3	121	112	4.19	5.01	1	ralt	TRUE	1.42341	1	0.330286	FALSE	-6.30781	-1.68293	0.908746	FALSE	FALSE	9	0.0783745	3.67347	4.45152	0.0201786
964	106	4	T	40	157	193	131	4.62	4.97	1	lalt	FALSE	0.39747	1	0.129143	FALSE	3.57494	-3.50085	0.0565615	FALSE	FALSE	31	0.0721698	3.79246	4.43039	0.00893209
965	106	5	O	80	0	168	107	4.91	4.34	1	ralt	TRUE	0.983604	1	0	FALSE	4.4969	-11.3262	7.87908	FALSE	FALSE	20	0.11873	3.07425	4.39521	0.0069805
966	106	6	R	20	75	124	89	3.65	4.5	1	ralt	TRUE	0.723733	1	0	FALSE	9.21014	4.54835	-7.90856	FALSE	FALSE	29	0.0539084	4.21335	4.38486	0.00813088
967	106	7	I	20	138	154	91	3.95	5.06	0	ralt	FALSE	0.459886	1	0.120286	FALSE	6.6704	-13.0319	13.7049	FALSE	FALSE	16	0.0223782	5.48176	4.39711	0.0178824
968	106	8	A	80	138	154	91	4.21	4.49	1	lalt	FALSE	0.691983	1	0	FALSE	5.85406	0.134111	-8.16368	FALSE	FALSE	4	0.12693	2.9779	4.36322	0.0140118
969	106	9	I	20	76	154	68	4.94	4.84	1	ralt	TRUE	1.19507	1	0.126	FALSE	20.5308	5.78324	-9.10534	FALSE	FALSE	12	0.0599581	4.0599	4.35177	0.00645259
970	106	10	I	20	0	168	107	4.87	5.1	0	ralt	FALSE	0.95012	1	0	FALSE	9.40263	-9.81121	4.61785	FALSE	FALSE	14	0.0172272	5.85916	4.36996	0.0179605
971	106	11	I	20	76	154	68	4.43	4.16	1	lalt	FALSE	1.97198	1	0.112857	FALSE	5.3921	-15.6103	19.2918	FALSE	FALSE	12	0.0786833	3.6678	4.35191	0.0163683
972	106	12	T	40	75	124	89	5.36	5.09	0	ralt	FALSE	0.916153	1	0	FALSE	3.14667	-3.27187	2.53385	FALSE	FALSE	35	0.00825472	6.92057	4.3823	0.0247638
973	106	13	R	20	75	124	89	5.01	4.8	1	ralt	TRUE	1.02413	1	0	FALSE	20.7732	8.31197	-7.78638	FALSE	FALSE	29	0.0666153	3.908	4.36908	0.0247299
974	106	14	O	80	3	121	112	3.92	4.23	0	ralt	FALSE	1.83312	1	0	FALSE	10.8183	-14.9074	-4.2226	FALSE	FALSE	21	0.00226415	8.78682	4.41229	0.0465012
975	106	15	R	20	75	124	89	5.49	5.26	1	ralt	TRUE	1.39723	1	0	FALSE	-2.26677	-7.77884	3.46447	FALSE	FALSE	29	0.0836108	3.58017	4.39354	0.0447819
976	106	16	T	40	157	193	131	5.15	4.28	1	ralt	TRUE	0.964141	1	0.109143	FALSE	4.12833	-18.4178	15.1522	FALSE	FALSE	31	0.074746	3.74186	4.37827	0.00514911
977	106	17	I	20	0	168	107	5.25	3.81	0	lalt	TRUE	1.4592	1	0	FALSE	5.89339	-2.54574	3.11568	FALSE	FALSE	14	0.0338199	4.88599	4.38156	0.00851874
978	106	18	R	20	75	124	89	4.71	3.99	1	ralt	TRUE	0.641317	1	0	FALSE	6.54507	0.24025	0.770307	FALSE	FALSE	29	0.0974843	3.35869	4.36086	0.0076123
979	106	19	D	40	0	168	107	3.57	4.1	0	ralt	FALSE	0.645442	1	0.141143	FALSE	10.0509	16.129	-15.3161	FALSE	FALSE	8	0.00926243	6.75439	4.38735	0.0178385
980	106	20	R	20	3	121	112	3.65	5.08	0	ralt	FALSE	0.331684	1	0	FALSE	6.82979	-11.2476	4.11925	FALSE	FALSE	27	0.0111186	6.49088	4.41046	0.0293052
981	106	21	A	80	138	154	91	4.18	4.19	1	ralt	TRUE	0.543717	1	0	FALSE	10.5427	-4.78079	3.42391	FALSE	FALSE	4	0.115525	3.11373	4.38652	0.0147078
982	106	22	R	20	3	121	112	4.46	5.4	0	ralt	FALSE	0.316984	1	0	FALSE	12.6535	2.45113	-14.1615	FALSE	FALSE	27	0.0279766	5.15964	4.39349	0.00725922
983	106	23	O	80	157	193	131	4.68	4.1	0	lalt	TRUE	0.309045	1	0	FALSE	14.6516	-1.29701	6.67563	FALSE	FALSE	19	0.00479693	7.70367	4.42628	0.0279963
984	106	24	I	20	3	121	112	4.11	4	0	ralt	FALSE	0.376196	1	0.144857	FALSE	8.85997	-20.0354	10.1994	FALSE	FALSE	15	0.0132075	6.24249	4.4453	0.0323712
985	106	25	A	80	75	124	89	5.28	4.62	0	ralt	FALSE	0.814375	1	0.123143	FALSE	12.1017	11.6192	-8.58609	FALSE	FALSE	5	0.00556758	7.48873	4.47507	0.0295152
986	106	26	A	80	138	154	91	4.6	4.98	1	ralt	TRUE	0.560399	1	0	FALSE	6.39267	10.6175	-13.0204	FALSE	FALSE	4	0.122337	3.03107	4.45088	0.0199033
987	106	27	D	40	138	154	91	4.21	5.25	0	ralt	FALSE	1.10437	1	0	FALSE	14.6577	-0.230511	1.51111	FALSE	FALSE	10	0.0107817	6.53528	4.47191	0.0124252
988	106	28	A	80	76	154	68	4.9	3.93	0	ralt	FALSE	0.404516	1	0	FALSE	13.1006	6.37382	-7.99254	FALSE	FALSE	0	0.0026533	8.558	4.50703	0.0387559
989	106	29	R	20	3	121	112	3.62	3.76	0	lalt	TRUE	0.634653	1	0	FALSE	8.89357	5.08376	-3.49459	FALSE	FALSE	27	0.0403483	4.63135	4.50536	0.0305347
990	106	30	R	20	76	154	68	4.22	5.38	0	lalt	TRUE	1.40782	1	0	FALSE	16.7579	-0.912386	5.2686	FALSE	FALSE	24	0.0137221	6.18735	4.52164	0.0120022
991	106	31	D	40	3	121	112	3.72	3.93	1	ralt	TRUE	0.265934	1	0	FALSE	22.0525	10.0264	5.71653	FALSE	FALSE	9	0.0605463	4.04582	4.51237	0.0106478
992	106	32	O	80	0	168	107	3.68	3.85	1	lalt	FALSE	0.813128	1	0	FALSE	9.87819	-3.69815	-2.1686	FALSE	FALSE	20	0.086293	3.53461	4.49667	0.00345834
993	106	33	R	20	75	124	89	4.03	4.52	1	ralt	TRUE	0.550339	1	0.132	FALSE	1.3557	-5.31385	-0.320921	FALSE	FALSE	29	0.0907848	3.46141	4.48046	0.00262771
994	106	34	O	80	0	168	107	4.8	3.93	1	ralt	TRUE	0.729486	1	0	FALSE	13.8735	1.24151	-6.23107	FALSE	FALSE	20	0.0981132	3.34941	4.46326	0.00237085
995	106	35	O	80	0	168	107	4.11	3.67	1	ralt	TRUE	0.306645	1	0	FALSE	13.9563	14.7224	-13.4376	FALSE	FALSE	20	0.110816	3.17376	4.44427	0.00477193
996	106	36	A	80	0	168	107	4.17	4.15	0	lalt	TRUE	0.893785	1	0	FALSE	11.1701	-1.45594	-5.34259	FALSE	FALSE	2	0.00471698	7.72792	4.47282	0.0172231
997	106	37	A	80	138	154	91	4	4.76	1	ralt	TRUE	0.676007	1	0	FALSE	2.92749	-8.06268	12.44	FALSE	FALSE	4	0.117601	3.08802	4.45315	0.016902
998	106	38	O	80	76	154	68	5.42	4.4	0	ralt	FALSE	1.96902	1	0.147714	FALSE	12.337	2.09622	-5.2147	FALSE	FALSE	18	0.00382458	8.03048	4.48291	0.0186239
999	106	39	O	80	0	168	107	4.8	4.55	1	lalt	FALSE	1.35101	1	0.143429	FALSE	8.10321	5.76724	-5.76151	FALSE	FALSE	20	0.118239	3.08022	4.46354	0.0183529
1000	106	40	D	40	3	121	112	4.76	5.35	1	ralt	TRUE	0.28812	1	0.141429	FALSE	4.18735	11.9848	-7.75516	FALSE	FALSE	9	0.0665343	3.90976	4.45473	0.00226488
1001	106	41	D	40	3	121	112	3.66	4.25	1	ralt	TRUE	0.247177	1	0	FALSE	-0.652649	6.96876	-8.41924	FALSE	FALSE	9	0.0786572	3.66828	4.44332	0.0060234
1002	106	42	O	80	0	168	107	4.52	4.82	1	ralt	TRUE	0.980345	1	0	FALSE	1.80193	-11.3806	0.692873	FALSE	FALSE	20	0.126512	2.98266	4.42405	0.00185615
1003	106	43	D	40	76	154	68	4.15	5.21	0	ralt	FALSE	0.729413	1	0.150857	FALSE	12.2171	3.90925	-0.931659	FALSE	FALSE	6	0.00644853	7.27681	4.44829	0.011959
1004	106	44	O	80	76	154	68	5.03	4.18	0	lalt	TRUE	1.47644	1	0	FALSE	5.44806	-15.1784	20.1143	FALSE	FALSE	18	0.0160377	5.96239	4.46147	0.0165659
1005	106	45	D	40	157	193	131	4.03	3.59	0	lalt	TRUE	0.491542	1	0	FALSE	15.5135	2.83011	1.74912	FALSE	FALSE	7	0.022129	5.49791	4.47004	0.00930474
1006	106	46	I	20	75	124	89	5	4.5	0	ralt	FALSE	0.781749	1	0	FALSE	7.18055	-4.83698	-6.71423	FALSE	FALSE	17	0.0103544	6.59362	4.48809	0.011344
1007	106	47	O	80	138	154	91	5.42	5.37	0	lalt	TRUE	0.389852	1	0	FALSE	1.99095	-13.6571	5.46803	FALSE	FALSE	22	0.00136394	9.518	4.52155	0.033654
1008	106	48	I	20	157	193	131	5.07	4.83	0	ralt	FALSE	0.340796	1	0.147714	FALSE	15.8384	-1.83972	-12.4762	FALSE	FALSE	13	0.0107817	6.53528	4.53825	0.0328985
1009	106	49	D	40	0	168	107	4.96	3.58	0	ralt	FALSE	0.289919	1	0.133714	FALSE	3.57036	3.50233	0.590581	FALSE	FALSE	8	0.017758	5.81538	4.54858	0.0112335
1010	106	50	T	40	157	193	131	4.58	3.96	1	lalt	FALSE	0.668045	1	0.137714	FALSE	15.3333	17.1995	-7.4411	FALSE	FALSE	31	0.0568232	4.13738	4.54235	0.00577458
1011	106	51	O	80	0	168	107	3.72	5.34	1	ralt	TRUE	0.362122	1	0	FALSE	3.83863	-4.47302	-0.123642	FALSE	FALSE	20	0.124919	3.00094	4.5242	0.00192721
1012	106	52	D	40	3	121	112	4.24	4.42	1	ralt	TRUE	0.411352	1	0	FALSE	16.3855	26.7549	-15.4652	FALSE	FALSE	9	0.0801887	3.64046	4.51326	0.00145194
1013	106	53	A	80	138	154	91	4.76	4.54	1	ralt	TRUE	0.560491	1	0	FALSE	-0.279423	-8.56018	1.32365	FALSE	FALSE	4	0.107696	3.21497	4.49812	0.00153263
1014	106	54	O	80	138	154	91	4.75	3.58	0	lalt	TRUE	0.651531	1	0	FALSE	21.4878	16.1469	-16.1018	FALSE	FALSE	22	0.012369	6.33713	4.5128	0.00606597
1015	106	55	I	20	138	154	91	4.03	3.84	0	ralt	FALSE	0.39874	1	0.131714	FALSE	1.49981	-3.4804	-1.23114	FALSE	FALSE	16	0.0215633	5.53528	4.52055	0.0086632
1016	106	56	T	40	157	193	131	4.16	3.96	1	lalt	FALSE	0.491943	1	0	FALSE	-0.652022	-2.41565	5.50026	FALSE	FALSE	31	0.0639869	3.96608	4.51342	0.00432346
1017	106	57	T	40	157	193	131	4.73	5.14	1	ralt	TRUE	0.613114	1	0	FALSE	3.667	-11.6265	-1.88963	FALSE	FALSE	31	0.0740515	3.75533	4.50437	0.00437615
1018	106	58	T	40	157	193	131	5.22	3.54	1	ralt	TRUE	0.240151	1	0	FALSE	17.0178	29.2969	-32.7041	FALSE	FALSE	31	0.083902	3.57515	4.49375	0.00371198
1019	106	59	I	20	157	193	131	4.36	3.98	0	ralt	FALSE	1.03129	1	0	FALSE	-2.99454	-15.8896	-6.69054	FALSE	FALSE	13	0.0200596	5.63956	4.50237	0.00398919
1020	106	60	A	80	0	168	107	4.42	3.69	0	ralt	FALSE	0.365396	2	0.332	FALSE	-5.66047	-21.882	37.9597	FALSE	FALSE	2	0.0139544	6.16314	4.51504	0.00757596
1021	106	61	A	80	3	121	112	4.74	3.66	0	ralt	FALSE	0.453592	2	0.138	FALSE	12.6799	7.17136	-16.6831	FALSE	FALSE	3	0.00466835	7.74287	4.53784	0.0143905
1022	106	62	I	20	75	124	89	3.86	5.31	0	lalt	TRUE	0.743721	2	0	FALSE	29.1471	11.7206	-14.4103	FALSE	FALSE	17	0.0188679	5.72792	4.54656	0.013186
1023	106	63	A	80	138	154	91	4.64	4.84	1	ralt	TRUE	0.392953	2	0	FALSE	3.72944	14.0102	-11.3432	FALSE	FALSE	4	0.106918	3.22542	4.53276	0.00371101
1024	106	64	I	20	76	154	68	4.08	4.56	1	ralt	TRUE	0.355949	2	0.144286	FALSE	2.8742	-13.5807	-4.32038	FALSE	FALSE	12	0.0469811	4.41177	4.53021	0.00179033
1025	106	65	I	20	76	154	68	4.53	4.69	1	ralt	TRUE	0.271124	2	0	FALSE	5.06597	6.14558	-5.97384	FALSE	FALSE	12	0.056417	4.14773	4.52536	0.00503129
1026	106	66	I	20	3	121	112	4.73	3.97	0	lalt	TRUE	0.544218	2	0	FALSE	0.479326	-1.39862	3.57048	FALSE	FALSE	15	0.0175731	5.83049	4.53476	0.00422084
1027	106	67	T	40	0	168	107	4.07	4.71	0	ralt	FALSE	0.58534	2	0	FALSE	2.6264	-2.72354	5.25583	FALSE	FALSE	32	0.00659461	7.2445	4.55367	0.0102435
1028	106	68	T	40	76	154	68	4.47	3.99	0	ralt	FALSE	0.545488	2	0.289429	FALSE	1.14694	-11.4302	17.1193	FALSE	FALSE	30	0.00707547	7.14296	4.57167	0.0136077
1029	106	69	R	20	75	124	89	4.03	5.2	1	lalt	FALSE	0.5116	2	0.145143	FALSE	7.38833	3.55323	0.83474	FALSE	FALSE	29	0.0691824	3.85345	4.56406	0.00730218
1030	106	70	D	40	75	124	89	4.28	4.25	0	ralt	FALSE	1.16868	2	0.145429	FALSE	12.2594	6.25164	-8.21334	FALSE	FALSE	11	0.00427198	7.87088	4.58568	0.0099854
1031	106	71	T	40	3	121	112	4.04	4.98	0	ralt	FALSE	0.439855	2	0.144	FALSE	17.2855	17.0311	-21.7702	FALSE	FALSE	33	0.00793511	6.97753	4.60202	0.0148814
1032	106	72	O	80	0	168	107	3.7	4.49	1	lalt	FALSE	0.871952	2	0	FALSE	12.118	-2.67228	6.90761	FALSE	FALSE	20	0.109888	3.18589	4.58855	0.00610893
1033	106	73	A	80	138	154	91	4.6	3.51	1	ralt	TRUE	0.393238	2	0	FALSE	13.3312	-5.42511	-7.29069	FALSE	FALSE	4	0.106284	3.23401	4.57574	0.000846705
1034	106	74	R	20	75	124	89	3.92	5.1	1	ralt	TRUE	0.535334	2	0	FALSE	13.6334	7.02276	-4.71116	FALSE	FALSE	29	0.0751286	3.73449	4.56747	0.00106488
1035	106	75	O	80	0	168	107	3.67	4.1	1	lalt	FALSE	0.863417	2	0.142	FALSE	7.64857	-8.94979	9.35841	FALSE	FALSE	20	0.115927	3.10871	4.55401	0.00100492
1036	106	76	T	40	157	193	131	4.02	5.25	1	ralt	TRUE	1.02954	2	0.132571	FALSE	-2.63014	-11.2136	12.0491	FALSE	FALSE	31	0.0793464	3.65569	4.54542	0.000947845
1037	106	77	R	20	75	124	89	4.66	4.8	1	ralt	TRUE	0.387701	2	0	FALSE	-5.59525	-4.71146	3.75631	FALSE	FALSE	29	0.0819836	3.60852	4.5366	0.00112176
1038	106	78	T	40	157	193	131	5.22	4.74	1	lalt	FALSE	0.535769	2	0.127429	FALSE	9.0055	-5.54174	-5.45211	FALSE	FALSE	31	0.0867262	3.52739	4.52727	0.00104729
1039	106	79	R	20	75	124	89	5.18	4.37	1	lalt	FALSE	0.774828	2	0	FALSE	10.3925	-9.11679	5.65168	FALSE	FALSE	29	0.0892535	3.48595	4.51776	0.000978927
1040	106	80	T	40	138	154	91	4.99	3.76	0	lalt	TRUE	0.540901	2	0.122	FALSE	9.44177	-2.50772	-3.1713	FALSE	FALSE	34	0.00390371	8.00094	4.53903	0.00892192
1041	106	81	T	40	0	168	107	4.48	4.76	0	ralt	FALSE	0.792021	2	0.134857	FALSE	10.1402	-9.23527	11.0295	FALSE	FALSE	32	0.0143525	6.12255	4.54942	0.0113486
1042	106	82	R	20	75	124	89	5.2	5.35	1	ralt	TRUE	0.654112	2	0.133714	FALSE	9.78617	-5.82987	-2.01223	FALSE	FALSE	29	0.0954589	3.38898	4.5392	0.00336853
1043	106	83	T	40	157	193	131	4.79	5.21	1	ralt	TRUE	0.695071	2	0.134	FALSE	12.1558	10.8886	-15.3168	FALSE	FALSE	31	0.0914857	3.45031	4.52964	0.000851893
1044	106	84	A	80	0	168	107	3.73	3.83	0	ralt	FALSE	0.34515	2	0.361429	FALSE	4.36038	-0.480436	5.27158	FALSE	FALSE	2	0.0194969	5.68061	4.53695	0.00257938
1045	106	85	D	40	157	193	131	3.92	5.33	0	lalt	TRUE	0.584377	2	0	FALSE	14.3539	6.85031	-7.64239	FALSE	FALSE	7	0.0230781	5.43733	4.54248	0.00393468
1046	106	86	A	80	138	154	91	5.01	5.5	1	lalt	FALSE	0.272497	2	0.155143	FALSE	4.83327	-9.62192	4.28604	FALSE	FALSE	4	0.103155	3.27711	4.53179	0.00214787
1047	106	87	O	80	138	154	91	5.15	4.89	0	ralt	FALSE	1.26743	2	0.145429	FALSE	15.3963	10.8308	-14.013	FALSE	FALSE	22	0.0171805	5.86308	4.54017	0.00265985
1048	106	88	A	80	138	154	91	5.12	4.04	1	ralt	TRUE	0.46149	2	0	FALSE	-0.956237	-7.24467	-6.9711	FALSE	FALSE	4	0.109556	3.19026	4.529	0.00260797
1049	106	89	A	80	157	193	131	4.14	5.13	0	ralt	FALSE	0.715562	2	0.140571	FALSE	19.0744	-5.17838	4.1282	FALSE	FALSE	1	0.000905659	10.1087	4.55565	0.0179127
1050	106	90	A	80	3	121	112	5.37	4.4	0	lalt	TRUE	0.907631	2	0.128286	FALSE	27.063	10.2652	1.38259	FALSE	FALSE	3	0.0115304	6.43841	4.56728	0.0205982
1051	106	91	I	20	76	154	68	4.44	4.71	1	ralt	TRUE	0.578703	2	0	FALSE	15.7796	-1.56911	-6.78171	FALSE	FALSE	12	0.052741	4.24493	4.56401	0.00383234
1052	106	92	T	40	76	154	68	4.54	3.6	0	ralt	FALSE	0.300824	2	0	FALSE	15.0561	5.54306	-8.19965	FALSE	FALSE	30	0.0135613	6.20436	4.57403	0.00335715
1053	106	93	D	40	3	121	112	4.39	4.03	1	ralt	TRUE	0.255067	2	0	FALSE	5.57306	-5.51373	-1.09779	FALSE	FALSE	9	0.0624543	4.00106	4.56901	0.00320454
1054	106	94	R	20	157	193	131	5.34	5.14	0	ralt	FALSE	0.626198	2	0.152286	FALSE	-0.494247	-16.1031	12.2153	FALSE	FALSE	25	0.00478955	7.70589	4.58689	0.00659067
1055	106	95	O	80	138	154	91	4.67	5.33	0	lalt	TRUE	0.980162	2	0	FALSE	14.0075	-2.53188	7.47332	FALSE	FALSE	22	0.0237649	5.39502	4.59146	0.00748296
1056	106	96	I	20	76	154	68	5.09	3.81	1	lalt	FALSE	0.820175	2	0	FALSE	13.7541	4.44582	-9.15475	FALSE	FALSE	12	0.058319	4.09989	4.58713	0.00209191
1057	106	97	D	40	3	121	112	4.1	4.29	1	ralt	TRUE	0.249322	2	0	FALSE	8.9246	-9.19344	-2.2752	FALSE	FALSE	9	0.0680948	3.87631	4.58129	0.00108217
1058	106	98	O	80	3	121	112	5.01	4.38	0	ralt	FALSE	0.302518	2	0	FALSE	3.98028	-3.57251	7.49095	FALSE	FALSE	21	0.00830752	6.91137	4.5948	0.00419774
1059	106	99	R	20	157	193	131	5.45	5.46	0	ralt	FALSE	0.329547	2	0.148571	FALSE	16.7224	9.00951	-10.1921	FALSE	FALSE	25	0.0120196	6.37847	4.60521	0.00635245
1060	106	100	O	80	157	193	131	5.09	4.24	0	lalt	TRUE	0.709658	2	0.148857	FALSE	1.24005	-16.4693	9.69036	FALSE	FALSE	19	0.00943396	6.72792	4.61742	0.00589844
1061	106	101	R	20	75	124	89	4.86	4.52	1	ralt	TRUE	0.801633	2	0	FALSE	11.9284	2.529	-6.75942	FALSE	FALSE	29	0.0895193	3.48166	4.60881	0.00356214
1062	106	102	T	40	0	168	107	3.82	4.68	0	ralt	FALSE	0.505724	2	0.15	FALSE	14.3138	3.57624	-4.54017	FALSE	FALSE	32	0.0194148	5.6867	4.61487	0.00199415
1063	106	103	O	80	0	168	107	5.31	3.82	1	lalt	FALSE	0.771786	2	0.148857	FALSE	3.54242	-10.9527	9.70185	FALSE	FALSE	20	0.0997692	3.32526	4.60533	0.00193476
1064	106	104	R	20	157	193	131	4.06	4.02	0	lalt	TRUE	1.17092	2	0	FALSE	18.2951	7.58768	-9.56628	FALSE	FALSE	25	0.0187332	5.73826	4.61166	0.0019552
1065	106	105	I	20	138	154	91	4.88	5.27	0	lalt	TRUE	0.804104	2	0	FALSE	-0.312442	-3.4522	1.23123	FALSE	FALSE	16	0.021009	5.57285	4.61692	0.00313373
1066	106	106	I	20	138	154	91	4.32	5.03	0	ralt	FALSE	1.44007	2	0.302	FALSE	15.658	5.33172	10.8328	FALSE	FALSE	16	0.0279033	5.16342	4.6196	0.00550802
1067	106	107	A	80	0	168	107	5.02	5.24	0	ralt	FALSE	1.00309	2	0.155714	FALSE	15.1977	7.08958	-5.43863	FALSE	FALSE	2	0.023354	5.42019	4.62382	0.00239845
1068	106	108	A	80	75	124	89	3.9	3.82	0	ralt	FALSE	0.506065	2	0.152286	FALSE	3.81501	5.62728	-10.483	FALSE	FALSE	5	0.00930293	6.7481	4.63548	0.00425179
1069	106	109	D	40	3	121	112	4.8	4.67	1	ralt	TRUE	0.488348	2	0.187143	FALSE	11.5144	-8.66771	3.83216	FALSE	FALSE	9	0.0693559	3.84984	4.62965	0.00334884
1070	106	110	A	80	157	193	131	3.71	4.28	0	ralt	FALSE	0.64939	2	0.197714	FALSE	6.61768	-20.5523	14.0035	FALSE	FALSE	1	0.00762471	7.0351	4.64257	0.00381679
1071	106	111	I	20	76	154	68	4.8	4.04	1	lalt	FALSE	0.562639	2	0.178857	FALSE	1.55356	1.73905	1.30721	FALSE	FALSE	12	0.0591708	4.07897	4.63826	0.0038626
1072	106	112	T	40	138	154	91	4.2	4.61	0	ralt	FALSE	0.7098	2	0.152	FALSE	9.66658	-2.67968	-3.01202	FALSE	FALSE	34	0.00981642	6.67059	4.64917	0.00316109
1073	106	113	D	40	3	121	112	5.15	4.59	1	ralt	TRUE	0.336901	2	0.199143	FALSE	20.2813	-10.4397	-0.813554	FALSE	FALSE	9	0.0742054	3.75233	4.6428	0.00303045
1074	106	114	T	40	157	193	131	4.31	3.5	1	lalt	FALSE	1.03498	2	0.330571	FALSE	8.45901	-8.88537	11.968	FALSE	FALSE	31	0.0792453	3.65753	4.63592	0.000682987
1075	106	115	D	40	76	154	68	3.69	5.49	0	lalt	TRUE	1.11109	2	0	FALSE	14.8632	-8.55051	2.95336	FALSE	FALSE	6	0.00999625	6.6444	4.64655	0.00287835
1076	106	116	D	40	138	154	91	4.44	4.17	0	lalt	TRUE	1.35811	2	0.131143	FALSE	-4.37149	-16.7745	7.43177	FALSE	FALSE	10	0.0110477	6.50011	4.65632	0.00484796
1077	106	117	O	80	0	168	107	3.83	5.13	1	ralt	TRUE	0.457276	2	0	FALSE	8.29674	-3.05511	-7.95479	FALSE	FALSE	20	0.097176	3.36326	4.64765	0.00254362
1078	106	118	D	40	3	121	112	5.33	5.03	1	ralt	TRUE	0.29842	2	0	FALSE	12.1234	5.89889	-5.52127	FALSE	FALSE	9	0.0782896	3.67503	4.64103	0.00056083
1079	106	119	T	40	75	124	89	5.45	4.08	0	ralt	FALSE	0.534471	2	0.149143	FALSE	26.4243	10.4032	-12.3317	FALSE	FALSE	35	0.00900791	6.79459	4.65214	0.00297503
1080	106	120	R	20	0	168	107	3.83	4.85	0	ralt	FALSE	0.346434	3	0.164	FALSE	3.56314	-4.62808	8.49633	FALSE	FALSE	26	0.00362845	8.10643	4.66872	0.00804118
1081	106	121	O	80	0	168	107	4.55	5.42	1	ralt	TRUE	0.487512	3	0.153143	FALSE	10.4417	9.28082	-15.9848	FALSE	FALSE	20	0.10107	3.30658	4.65984	0.00558606
1082	106	122	R	20	76	154	68	4.78	4.38	0	lalt	TRUE	0.700607	3	0	FALSE	18.0525	5.40311	-1.23745	FALSE	FALSE	24	0.0120611	6.37349	4.6686	0.00221289
1083	106	123	D	40	3	121	112	4.04	4.89	1	ralt	TRUE	0.384732	3	0	FALSE	8.09327	-8.71858	-0.693971	FALSE	FALSE	9	0.082117	3.60618	4.66165	0.00225826
1084	106	124	A	80	75	124	89	3.63	3.84	0	ralt	FALSE	0.314864	3	0.154571	FALSE	12.2086	1.21262	-4.27603	FALSE	FALSE	5	0.0146226	6.09565	4.6689	0.00191128
1085	106	125	A	80	138	154	91	4.2	4.77	1	ralt	TRUE	0.671155	3	0.139429	FALSE	9.63787	-7.65848	3.03327	FALSE	FALSE	4	0.0905895	3.46451	4.66119	0.00186608
1086	106	126	I	20	76	154	68	3.63	3.68	1	lalt	FALSE	0.744247	3	0	FALSE	16.9543	-9.98372	3.68709	FALSE	FALSE	12	0.0598649	4.06215	4.6571	0.000628621
1087	106	127	I	20	76	154	68	4.69	5	1	ralt	TRUE	0.424465	3	0	FALSE	6.40691	-2.19231	-1.96526	FALSE	FALSE	12	0.0656326	3.92944	4.65229	0.00159274
1088	106	128	R	20	75	124	89	3.94	5.49	1	lalt	FALSE	0.886462	3	0.151714	FALSE	13.6288	15.564	-12.9484	FALSE	FALSE	29	0.080879	3.62809	4.64579	0.000611247
1089	106	129	O	80	157	193	131	4.72	4.14	0	lalt	TRUE	0.659522	3	0	FALSE	13.3728	5.83887	-9.02327	FALSE	FALSE	19	0.0138365	6.17538	4.65336	0.00188803
1090	106	130	R	20	75	124	89	3.56	4.92	1	ralt	TRUE	0.652703	3	0.158	FALSE	-4.15785	-14.1915	16.3936	FALSE	FALSE	29	0.0859286	3.54072	4.64643	0.00185558
1091	106	131	I	20	3	121	112	5.16	5.48	0	lalt	TRUE	0.646868	3	0	FALSE	13.701	-22.404	15.4596	FALSE	FALSE	15	0.0167213	5.90217	4.65254	0.00157239
1092	106	132	I	20	0	168	107	3.55	5.46	0	lalt	TRUE	1.1288	3	0	FALSE	14.2555	1.52116	5.04805	FALSE	FALSE	14	0.0166217	5.91078	4.65864	0.00264427
1093	106	133	D	40	0	168	107	5.32	4.74	0	ralt	FALSE	0.825902	3	0.174571	FALSE	7.53199	-16.7578	13.2407	FALSE	FALSE	8	0.0148487	6.07352	4.66549	0.00276692
1094	106	134	I	20	76	154	68	4.56	4.08	1	lalt	FALSE	0.828905	3	0.150571	FALSE	8.24788	-12.3678	0.758777	FALSE	FALSE	12	0.0688124	3.86119	4.66046	0.00174508
1095	106	135	O	80	0	168	107	4.46	3.84	1	lalt	FALSE	1.16894	3	0.140857	FALSE	10.6891	-5.96203	4.78164	FALSE	FALSE	20	0.0986428	3.34164	4.65257	0.000494272
1096	106	136	I	20	3	121	112	3.65	5.16	0	lalt	TRUE	0.821155	3	0.136571	FALSE	-1.09097	-6.89115	12.0846	FALSE	FALSE	15	0.0220491	5.50313	4.6565	0.00115914
1097	106	137	D	40	138	154	91	3.67	5.11	0	lalt	TRUE	1.60226	3	0	FALSE	4.45994	-4.20688	-1.4029	FALSE	FALSE	10	0.015487	6.0128	4.66293	0.00229626
1098	106	138	D	40	157	193	131	3.95	4.84	0	lalt	TRUE	0.6733	3	0.135429	FALSE	-5.32221	-21.456	2.49939	FALSE	FALSE	7	0.0217957	5.51981	4.66685	0.00228369
1099	106	139	A	80	138	154	91	4.01	5.04	1	ralt	TRUE	0.938434	3	0	FALSE	4.53562	-8.9961	0.829627	FALSE	FALSE	4	0.0890566	3.48913	4.65992	0.00116023
1100	106	140	I	20	157	193	131	4.45	4.23	0	lalt	TRUE	0.960497	3	0	FALSE	9.87369	6.17044	1.96442	FALSE	FALSE	13	0.0165094	5.92057	4.66581	0.00142798
1101	106	141	I	20	76	154	68	4.44	5.09	1	ralt	TRUE	0.557662	3	0.127143	FALSE	12.9102	6.60137	4.79112	FALSE	FALSE	12	0.0717408	3.80106	4.66066	0.00147692
1102	106	142	D	40	75	124	89	3.57	4.28	0	lalt	TRUE	0.829701	3	0	FALSE	-2.92373	-15.2999	13.9738	FALSE	FALSE	11	0.00816197	6.93687	4.6711	0.00251257
1103	106	143	A	80	157	193	131	4.29	3.56	0	ralt	FALSE	0.627906	3	0.138857	FALSE	10.8446	-13.6902	5.69484	FALSE	FALSE	1	0.0118056	6.40438	4.6791	0.00384419
1104	106	144	T	40	138	154	91	4.66	5.1	0	ralt	FALSE	1.67604	3	0.144286	FALSE	21.3781	6.59152	-12.1704	FALSE	FALSE	34	0.0136268	6.19741	4.68607	0.00299515
1105	106	145	R	20	76	154	68	4.9	5.15	0	lalt	TRUE	0.952026	3	0.15	FALSE	17.05	-4.71479	-10.7097	FALSE	FALSE	24	0.0160534	5.96098	4.69187	0.0025746
1106	106	146	T	40	157	193	131	4.38	4.71	1	lalt	FALSE	0.721052	3	0.320857	FALSE	13.4375	-3.53103	7.93649	FALSE	FALSE	31	0.0708066	3.81997	4.68683	0.0014347
1107	106	147	I	20	76	154	68	4.34	4.45	1	ralt	TRUE	1.29907	3	0	FALSE	8.25338	2.72589	2.36903	FALSE	FALSE	12	0.0748531	3.73979	4.68142	0.000490267
1108	106	148	O	80	75	124	89	4.05	4.38	0	lalt	TRUE	0.906233	3	0	FALSE	7.481	-8.11974	-1.48549	FALSE	FALSE	23	0.00184577	9.08156	4.69869	0.00673099
1109	106	149	T	40	157	193	131	5.01	3.72	1	lalt	FALSE	0.775313	3	0.143143	FALSE	11.6326	-4.7552	-3.52709	FALSE	FALSE	31	0.0750637	3.73574	4.69326	0.00669159
1110	106	150	I	20	76	154	68	3.97	3.86	1	lalt	FALSE	1.05847	3	0.156286	FALSE	11.3041	8.66359	-6.34109	FALSE	FALSE	12	0.0790221	3.6616	4.68751	0.000444926
1111	106	151	R	20	75	124	89	4.26	4.44	1	ralt	TRUE	1.26061	3	0.146857	FALSE	17.1471	0.271398	-4.27908	FALSE	FALSE	29	0.0816265	3.61482	4.68158	0.000419157
1112	106	152	T	40	3	121	112	5.44	4.87	0	lalt	TRUE	0.908718	3	0.0825714	FALSE	0.314196	-15.6745	3.88031	FALSE	FALSE	33	0.00983541	6.6678	4.69034	0.0019319
1113	106	153	R	20	138	154	91	4.75	3.82	0	ralt	FALSE	0.879714	3	0.148857	FALSE	14.8253	7.76913	-5.32589	FALSE	FALSE	28	0.00539084	7.53528	4.70244	0.00456859
1114	106	154	D	40	75	124	89	4.81	5.36	0	lalt	TRUE	1.07483	3	0	FALSE	7.54622	-16.1287	5.98647	FALSE	FALSE	11	0.0129096	6.27541	4.70933	0.00416001
1115	106	155	R	20	75	124	89	4.24	4.32	1	lalt	FALSE	1.47982	3	0.152571	FALSE	14.478	12.9386	-9.04713	FALSE	FALSE	29	0.0851526	3.55381	4.70311	0.00150538
1116	106	156	T	40	76	154	68	5.26	4.2	0	ralt	FALSE	0.672973	3	0.156	FALSE	7.39202	5.61471	-4.68811	FALSE	FALSE	30	0.0142492	6.13297	4.70931	0.00137196
1117	106	157	O	80	0	168	107	3.63	3.84	1	ralt	TRUE	0.643063	3	0	FALSE	11.2642	-5.14959	0.533406	FALSE	FALSE	20	0.0925799	3.43316	4.70255	0.00134554
1118	106	158	O	80	75	124	89	3.84	5.2	0	lalt	TRUE	0.509245	3	0	FALSE	17.1486	7.44497	-3.04834	FALSE	FALSE	23	0.00690527	7.17809	4.71301	0.00238027
1119	106	159	R	20	0	168	107	3.85	4.97	0	ralt	FALSE	1.17028	3	0.140857	FALSE	10.1869	-7.32789	1.11075	FALSE	FALSE	26	0.00803096	6.96021	4.72253	0.00413266
1120	106	160	I	20	75	124	89	5.34	5.39	0	lalt	TRUE	0.673424	3	0.138	FALSE	4.67293	11.9108	-10.6812	FALSE	FALSE	17	0.014536	6.10423	4.7284	0.00303827
1121	106	161	D	40	76	154	68	3.55	4.29	0	lalt	TRUE	0.563405	3	0	FALSE	-0.507385	-8.81628	3.34973	FALSE	FALSE	6	0.0127382	6.29469	4.73504	0.00236687
1122	106	162	R	20	0	168	107	4.62	4.09	0	ralt	FALSE	0.353619	3	0.159429	FALSE	9.16547	-9.25087	7.27699	FALSE	FALSE	26	0.0129598	6.26981	4.74151	0.00246848
1123	106	163	T	40	157	193	131	3.86	3.65	1	lalt	FALSE	0.849732	3	0	FALSE	8.33991	7.57555	-7.59048	FALSE	FALSE	31	0.074808	3.74066	4.73629	0.00141634
1124	106	164	D	40	3	121	112	5.37	4.18	1	ralt	TRUE	0.524908	3	0	FALSE	5.10521	-11.6306	3.44485	FALSE	FALSE	9	0.070283	3.83068	4.73155	0.000413415
1125	106	165	A	80	138	154	91	5.21	3.82	1	lalt	FALSE	0.841034	3	0.174857	FALSE	6.33283	-8.42545	2.9697	FALSE	FALSE	4	0.082512	3.59925	4.72575	0.00038816
1126	106	166	O	80	0	168	107	3.87	5.04	1	ralt	TRUE	0.37616	3	0.142286	FALSE	11.3026	4.36583	-1.92984	FALSE	FALSE	20	0.0934056	3.42035	4.71916	0.000324685
1127	106	167	O	80	0	168	107	3.51	4.68	1	ralt	TRUE	0.275286	3	0.120857	FALSE	4.99629	-9.29212	0.993963	FALSE	FALSE	20	0.0978716	3.35297	4.7123	0.000654679
1128	106	168	R	20	76	154	68	4.25	3.69	0	ralt	FALSE	0.912426	3	0.149429	FALSE	15.872	4.46688	-5.55364	FALSE	FALSE	24	0.0191454	5.70686	4.71634	0.000937699
1129	106	169	T	40	76	154	68	3.59	3.75	0	ralt	FALSE	0.605638	3	0.296286	FALSE	23.6842	7.16769	-0.0163172	FALSE	FALSE	30	0.0182237	5.77804	4.72065	0.00162347
1130	106	170	R	20	75	124	89	4.65	4.22	1	ralt	TRUE	0.738861	3	0.176857	FALSE	15.3654	5.57528	-14.4725	FALSE	FALSE	29	0.0838066	3.57679	4.71494	0.000989468
1131	106	171	R	20	3	121	112	4.11	4.06	0	lalt	TRUE	0.425917	3	0	FALSE	10.7819	-1.95946	-3.79996	FALSE	FALSE	27	0.0175007	5.83644	4.71947	0.00100967
1132	106	172	R	20	138	154	91	5.02	5.41	0	lalt	TRUE	0.628155	3	0	FALSE	-0.016675	3.2022	-2.21243	FALSE	FALSE	28	0.0097061	6.68689	4.72742	0.00229053
1133	106	173	T	40	75	124	89	3.58	5.3	0	lalt	TRUE	0.796208	3	0	FALSE	2.6701	-4.1942	0.235408	FALSE	FALSE	35	0.0114652	6.44659	4.73435	0.00267615
1134	106	174	A	80	75	124	89	3.93	5.36	0	ralt	FALSE	0.320299	3	0.151429	FALSE	9.61396	-11.2761	13.8927	FALSE	FALSE	5	0.015903	5.97456	4.73931	0.0021308
1135	106	175	R	20	0	168	107	3.77	5.07	0	ralt	FALSE	0.774365	3	0.251429	FALSE	10.7564	1.06434	-3.41492	FALSE	FALSE	26	0.0169007	5.88678	4.74386	0.0017412
1136	106	176	R	20	138	154	91	5.2	5.42	0	lalt	TRUE	0.57141	3	0.147143	FALSE	6.58027	-7.607	4.32737	FALSE	FALSE	28	0.0142399	6.13391	4.74939	0.00182271
1137	106	177	D	40	3	121	112	4.54	4.55	1	ralt	TRUE	0.251524	3	0.129429	FALSE	3.20975	-9.46449	0.101988	FALSE	FALSE	9	0.0706883	3.82239	4.74486	0.00116605
1138	106	178	R	20	75	124	89	3.86	5.23	1	lalt	FALSE	0.819604	3	0.440286	TRUE	3.85006	-16.3796	9.22741	FALSE	FALSE	29	0.0853465	3.55052	4.73914	0.000335682
1139	106	179	D	40	3	121	112	5.03	4.11	1	ralt	TRUE	0.609694	3	0.130571	FALSE	15.6601	5.11001	-9.51374	FALSE	FALSE	9	0.0746819	3.7431	4.73434	0.000321171
1140	106	180	D	40	3	121	112	5.27	3.58	1	ralt	TRUE	0.548757	4	0.130286	FALSE	3.50918	-5.7856	0.0171121	FALSE	FALSE	9	0.0789658	3.66263	4.72922	0.000734072
1141	106	181	D	40	138	154	91	5.3	4.12	0	lalt	TRUE	0.455892	4	0	FALSE	4.78706	10.8499	10.96	FALSE	FALSE	10	0.016955	5.88214	4.7337	0.000956638
1142	106	182	D	40	0	168	107	3.75	3.59	0	ralt	FALSE	0.783933	4	0.161714	FALSE	22.0175	-25.9699	-0.49108	FALSE	FALSE	8	0.0160983	5.95695	4.73844	0.00162339
1143	106	183	D	40	3	121	112	5.38	3.81	1	ralt	TRUE	0.293221	4	0.148	FALSE	10.7085	11.6129	-23.4822	FALSE	FALSE	9	0.0824502	3.60033	4.7331	0.000974724
1144	106	184	A	80	157	193	131	5.18	5.33	0	ralt	FALSE	0.584318	4	0.16	FALSE	11.8493	16.2446	-7.50066	FALSE	FALSE	1	0.0141509	6.14296	4.73854	0.00106943
1145	106	185	R	20	75	124	89	4.86	3.64	1	lalt	FALSE	0.603298	4	0.484	TRUE	10.8292	-17.9547	21.4506	FALSE	FALSE	29	0.0871681	3.52006	4.7329	0.00105399
1146	106	186	D	40	75	124	89	4.65	5.46	0	lalt	TRUE	0.5544	4	0.151429	FALSE	5.9383	2.47673	-3.37834	FALSE	FALSE	11	0.0155533	6.00664	4.73777	0.000964293
1147	106	187	I	20	76	154	68	5.35	3.97	1	lalt	FALSE	1.15945	4	0.142571	FALSE	17.2323	7.07842	-2.30298	FALSE	FALSE	12	0.0703951	3.82838	4.73353	0.000996821
1148	106	188	T	40	0	168	107	5.2	3.99	0	ralt	FALSE	1.34646	4	0.139429	FALSE	-1.08141	-10.0646	5.34671	FALSE	FALSE	32	0.0164252	5.92795	4.73805	0.00094436
1149	106	189	O	80	76	154	68	5.11	4.37	0	lalt	TRUE	0.578564	4	0.135143	FALSE	13.3517	-5.59889	2.47066	FALSE	FALSE	18	0.0101468	6.62284	4.74517	0.00197081
1150	106	190	I	20	75	124	89	4.87	3.64	0	lalt	TRUE	0.551657	4	0	FALSE	2.28391	-15.2897	-6.00183	FALSE	FALSE	17	0.0170312	5.87567	4.7494	0.00192992
1151	106	191	D	40	3	121	112	4.41	4.78	1	ralt	TRUE	0.274779	4	0.140286	FALSE	7.86838	7.35142	-2.49572	FALSE	FALSE	9	0.0839498	3.57433	4.7441	0.000866161
1152	106	192	T	40	138	154	91	5.09	5.33	0	lalt	TRUE	1.0829	4	0.141714	FALSE	6.97789	0.442919	0.636216	FALSE	FALSE	34	0.015144	6.04511	4.74896	0.000942247
1153	106	193	T	40	157	193	131	3.67	4.52	1	ralt	TRUE	1.10886	4	0	FALSE	7.65264	-3.9761	9.18251	FALSE	FALSE	31	0.0693746	3.84945	4.74487	0.000970018
1154	106	194	A	80	138	154	91	3.9	4.71	1	ralt	TRUE	0.434	4	0	FALSE	-11.4742	-15.8663	1.2217	FALSE	FALSE	4	0.0764561	3.70922	4.74023	0.00031248
1155	106	195	O	80	0	168	107	4.18	4.48	1	ralt	TRUE	0.387201	4	0.117429	FALSE	13.379	-2.65366	8.22537	FALSE	FALSE	20	0.0903373	3.46853	4.73461	0.000266309
1156	106	196	T	40	157	193	131	5.26	3.62	1	ralt	TRUE	0.688305	4	0.120571	FALSE	1.64431	-10.8102	-0.156836	FALSE	FALSE	31	0.0727879	3.78016	4.73035	0.000272406
1157	106	197	O	80	0	168	107	3.5	5.4	1	ralt	TRUE	0.331464	4	0.132857	FALSE	-0.947318	-13.8386	6.03427	FALSE	FALSE	20	0.0938538	3.41344	4.7246	0.000264919
1158	106	198	O	80	3	121	112	4.4	3.74	0	lalt	TRUE	0.884553	4	0.126857	FALSE	-15.8272	-11.0208	16.9349	FALSE	FALSE	21	0.0090308	6.79093	4.73214	0.00135163
1159	106	199	A	80	3	121	112	4.09	3.78	0	lalt	TRUE	0.531727	4	0	FALSE	4.11642	9.36632	-6.68036	FALSE	FALSE	3	0.0104376	6.58207	4.73888	0.00231308
1160	106	200	A	80	138	154	91	4.49	3.77	1	ralt	TRUE	0.674937	4	0	FALSE	9.9692	9.41363	-7.64153	FALSE	FALSE	4	0.0787496	3.66658	4.73421	0.00120924
1161	106	201	R	20	138	154	91	4.8	4.85	0	lalt	TRUE	1.05608	4	0	FALSE	-1.14852	-22.2621	5.07307	FALSE	FALSE	28	0.0169572	5.88195	4.73835	0.000807401
1162	106	202	T	40	75	124	89	4.78	4.69	0	ralt	FALSE	1.0231	4	0.382857	FALSE	0.670469	-6.17013	9.20232	FALSE	FALSE	35	0.0142699	6.13089	4.74337	0.00145708
1163	106	203	T	40	157	193	131	4.86	3.59	1	lalt	FALSE	1.12112	4	0.156	FALSE	20.1399	10.2415	-7.25499	FALSE	FALSE	31	0.0748401	3.74004	4.73904	0.000923637
1164	106	204	T	40	3	121	112	3.92	3.81	0	lalt	TRUE	0.617367	4	0	FALSE	-4.33828	-14.5902	8.1916	FALSE	FALSE	33	0.0118711	6.39641	4.74499	0.00105989
1165	106	205	D	40	76	154	68	4.16	5.46	0	lalt	TRUE	0.607503	4	0	FALSE	6.16694	0.359841	-5.9751	FALSE	FALSE	6	0.014562	6.10165	4.74983	0.00167062
1166	106	206	I	20	76	154	68	4.1	3.87	1	lalt	FALSE	0.653566	4	0.178857	FALSE	7.40969	1.05573	7.20519	FALSE	FALSE	12	0.0690005	3.85725	4.74599	0.000900517
1167	106	207	A	80	76	154	68	5.18	3.75	0	lalt	TRUE	0.41476	4	0.153714	FALSE	15.6561	17.6149	-19.0023	FALSE	FALSE	0	0.00481404	7.69854	4.75609	0.00213818
1168	106	208	A	80	138	154	91	5.36	4.1	1	ralt	TRUE	0.667889	4	0.144571	FALSE	8.01566	1.48746	-12.4083	FALSE	FALSE	4	0.080266	3.63907	4.75139	0.00210458
1169	106	209	T	40	157	193	131	4.75	5.37	1	lalt	FALSE	0.960913	4	0.283714	FALSE	15.7323	1.83886	3.33675	FALSE	FALSE	31	0.0770889	3.69733	4.74697	0.000251885
1170	106	210	O	80	75	124	89	5.44	3.85	0	lalt	TRUE	0.839896	4	0.189143	FALSE	4.70886	14.4529	-1.1146	FALSE	FALSE	23	0.00951066	6.71624	4.75385	0.00120522
1171	106	211	O	80	76	154	68	5.19	4.97	0	lalt	TRUE	0.928999	4	0.101143	FALSE	3.35278	-9.44826	18.5055	FALSE	FALSE	18	0.0132916	6.23334	4.75902	0.00185683
1172	106	212	A	80	138	154	91	5.26	3.94	1	ralt	TRUE	0.320005	4	0.142286	FALSE	-11.768	-8.90906	-21.289	FALSE	FALSE	4	0.0830037	3.59068	4.7542	0.000896107
1173	106	213	A	80	138	154	91	3.61	4.39	1	ralt	TRUE	0.394071	4	0	FALSE	5.05839	-7.28136	-5.34597	FALSE	FALSE	4	0.0866864	3.52805	4.74918	0.000496942
1174	106	214	I	20	76	154	68	5.38	4.66	1	ralt	TRUE	0.797333	4	0.144286	FALSE	1.29366	-14.853	12.5032	FALSE	FALSE	12	0.0707925	3.82026	4.74533	0.000244499
1175	106	215	R	20	157	193	131	4.5	4.73	0	lalt	TRUE	1.0693	4	0.124571	FALSE	10.0174	2.43157	10.0016	FALSE	FALSE	25	0.0144328	6.1145	4.75005	0.000839188
1176	106	216	A	80	3	121	112	4.74	4.76	0	lalt	TRUE	0.480415	4	0	FALSE	2.91379	-4.74541	-6.25634	FALSE	FALSE	3	0.0137017	6.1895	4.75499	0.00143379
1177	106	217	R	20	75	124	89	4.43	4.31	1	ralt	TRUE	0.831483	4	0	FALSE	-3.63806	10.1356	-10.6733	FALSE	FALSE	29	0.0800955	3.64214	4.75049	0.000845853
1178	106	218	I	20	76	154	68	5.2	4.04	1	ralt	TRUE	0.459612	4	0	FALSE	-6.51607	-9.7027	-0.624824	FALSE	FALSE	12	0.0736146	3.76386	4.74648	0.00024141
1179	106	219	O	80	75	124	89	3.99	4.27	0	lalt	TRUE	0.562715	4	0	FALSE	-3.7223	-4.37007	-1.45017	FALSE	FALSE	23	0.0130966	6.25467	4.75161	0.000874061
1180	106	220	D	40	3	121	112	4.04	5.2	1	ralt	TRUE	0.616886	4	0	FALSE	11.4664	37.9743	-9.67578	FALSE	FALSE	9	0.0783461	3.67399	4.74729	0.000861002
1181	106	221	T	40	157	193	131	4.63	4.9	1	lalt	FALSE	0.851948	4	0.674571	TRUE	8.44811	16.5534	4.86338	FALSE	FALSE	31	0.0773805	3.69189	4.74307	0.000231861
1182	106	222	A	80	138	154	91	5.34	5.23	1	ralt	TRUE	0.568026	4	0	FALSE	3.73693	-16.5798	2.21589	FALSE	FALSE	4	0.0875384	3.51394	4.73822	0.00021606
1183	106	223	I	20	76	154	68	3.94	4.51	1	ralt	TRUE	0.300049	4	0	FALSE	7.72492	5.45275	-12.5827	FALSE	FALSE	12	0.0760545	3.71682	4.73416	0.000216688
1184	106	224	R	20	75	124	89	4.34	5.06	1	ralt	TRUE	0.524194	4	0	FALSE	12.1948	6.66789	-3.0384	FALSE	FALSE	29	0.0817852	3.61202	4.72974	0.0002234
1185	106	225	A	80	138	154	91	4.93	4.98	1	ralt	TRUE	0.325267	4	0	FALSE	3.30015	-6.7551	0.979757	FALSE	FALSE	4	0.0903636	3.46811	4.72482	0.000200367
1186	106	226	A	80	76	154	68	5.09	5.21	0	lalt	TRUE	0.501318	4	0	FALSE	9.11328	3.2696	-4.51833	FALSE	FALSE	0	0.00828172	6.91585	4.73206	0.00117787
1187	106	227	I	20	76	154	68	4.2	4.45	1	ralt	TRUE	0.292331	4	0	FALSE	-3.48343	-21.8796	26.8154	FALSE	FALSE	12	0.0787001	3.66749	4.72791	0.00118925
1188	106	228	O	80	0	168	107	5.18	3.94	1	ralt	TRUE	0.26053	4	0.150857	FALSE	6.04966	5.85185	-16.7609	FALSE	FALSE	20	0.0866209	3.52914	4.72328	0.000205485
1189	106	229	I	20	157	193	131	4.58	5.28	0	lalt	TRUE	0.523652	4	0.127429	FALSE	5.7867	-24.2729	19.5033	FALSE	FALSE	13	0.0147383	6.08428	4.72776	0.000717574
1190	106	230	T	40	157	193	131	4.85	4.06	1	ralt	TRUE	1.01167	4	0	FALSE	3.41107	-7.15415	22.4085	FALSE	FALSE	31	0.0785218	3.67076	4.72369	0.000725916
1191	106	231	O	80	0	168	107	4.94	3.77	1	ralt	TRUE	0.420789	4	0.14	FALSE	5.99582	8.1626	-24.7606	FALSE	FALSE	20	0.089393	3.48369	4.71896	0.000197711
1192	106	232	I	20	0	168	107	4.13	5.27	0	ralt	FALSE	0.245919	4	0.141714	FALSE	15.996	6.06298	-4.87403	FALSE	FALSE	14	0.0141509	6.14296	4.72361	0.000722767
1193	106	233	T	40	157	193	131	5.36	4.69	1	lalt	FALSE	0.950988	4	0.167714	FALSE	9.83005	-11.7069	15.7231	FALSE	FALSE	31	0.0813635	3.61947	4.71941	0.000730084
1194	106	234	T	40	3	121	112	4.79	5.13	0	lalt	TRUE	0.713024	4	0.148571	FALSE	0.644901	-16.167	-8.72141	FALSE	FALSE	33	0.0142558	6.13231	4.724	0.000718724
1195	106	235	O	80	157	193	131	3.83	4.07	0	lalt	TRUE	0.673986	4	0	FALSE	-5.0032	-12.946	0.740213	FALSE	FALSE	19	0.0121145	6.36713	4.72931	0.00133323
1196	106	236	D	40	3	121	112	4.34	3.85	1	ralt	TRUE	0.262272	4	0	FALSE	3.41008	-3.11369	-10.325	FALSE	FALSE	9	0.077414	3.69126	4.72539	0.000818311
1197	106	237	O	80	3	121	112	4.64	4.18	0	ralt	FALSE	0.274478	4	0.499143	TRUE	17.6013	3.2183	12.3414	FALSE	FALSE	21	0.0114037	6.45436	4.73095	0.000851799
1198	106	238	A	80	76	154	68	5.29	4.9	0	lalt	TRUE	0.43361	4	0.142857	FALSE	8.46098	-17.7448	-4.28246	FALSE	FALSE	0	0.0115687	6.43364	4.73639	0.00147827
1199	106	239	D	40	3	121	112	4.92	5.45	1	ralt	TRUE	0.479646	4	0	FALSE	1.77642	-12.6201	5.55355	FALSE	FALSE	9	0.0802058	3.64015	4.73232	0.00082803
1200	107	0	D	80	138	154	91	4.64	5.44	1	ralt	FALSE	0.795299	1	0.124286	FALSE	6.7877	-22.2613	16.3181	FALSE	FALSE	10	0.130503	2.93784	4.43864	0.00334652
1201	107	1	A	40	75	124	89	4.36	4.97	0	ralt	TRUE	1.26732	1	0.326	FALSE	4.32175	-6.83213	-0.851788	FALSE	FALSE	5	0.0214176	5.54506	4.45069	0.0192883
1202	107	2	D	80	76	154	68	4.08	5.07	0	ralt	TRUE	0.520279	1	0.108571	FALSE	-0.254964	-6.3924	0.504101	FALSE	FALSE	6	0.010427	6.58353	4.47779	0.0432259
1203	107	3	D	80	3	121	112	4.61	5.07	0	ralt	TRUE	0.384468	1	0.110857	FALSE	2.28012	-1.0423	-1.18038	FALSE	FALSE	9	0.00870827	6.8434	4.50715	0.0557331
1204	107	4	O	20	75	124	89	5.16	4.56	1	ralt	FALSE	0.580524	1	0.213714	FALSE	4.37391	29.8082	-1.67518	FALSE	FALSE	23	0.0551887	4.17948	4.49262	0.0347079
1205	107	5	A	40	138	154	91	5.15	5.41	0	ralt	TRUE	0.158591	1	0.121429	FALSE	6.47176	-0.845785	3.15922	FALSE	FALSE	4	0.0110446	6.50051	4.51701	0.0289525
1206	107	6	T	40	3	121	112	4.26	4.22	0	ralt	TRUE	0.932535	1	0.107429	FALSE	8.2575	0.681336	-5.48637	FALSE	FALSE	33	0.0175202	5.83484	4.53162	0.0380934
1207	107	7	R	80	0	168	107	4.16	5.32	1	ralt	FALSE	0.390699	1	0.109714	FALSE	2.48061	-12.5257	-4.13818	FALSE	FALSE	26	0.113208	3.14296	4.49728	0.0176794
1208	107	8	D	80	138	154	91	4.05	3.58	1	ralt	FALSE	0.310824	1	0.127143	FALSE	7.35217	2.34328	-3.77035	FALSE	FALSE	10	0.129503	2.94895	4.46058	0.00428128
1209	107	9	T	40	3	121	112	4.95	3.57	0	ralt	TRUE	0.50801	1	0.118	FALSE	0.873477	8.04363	0.199084	FALSE	FALSE	33	0.0385744	4.69621	4.45837	0.00887268
1210	107	10	O	20	75	124	89	4.02	4.22	1	ralt	FALSE	0.63816	1	0.0574286	FALSE	-2.34858	-3.87262	0.20052	FALSE	FALSE	23	0.0697293	3.84209	4.44124	0.0105187
1211	107	11	O	20	157	193	131	4.52	4.79	0	ralt	TRUE	0.425329	1	0.234857	FALSE	3.25203	-1.7228	2.00225	FALSE	FALSE	19	0.00602168	7.37562	4.47446	0.0312038
1212	107	12	D	80	75	124	89	5.22	3.89	0	lalt	FALSE	0.535364	1	0.116286	FALSE	1.6369	-23.5042	15.976	FALSE	FALSE	11	0.00235849	8.72792	4.51609	0.0718937
1213	107	13	D	80	3	121	112	4.93	5.41	0	ralt	TRUE	0.151535	1	0.342571	FALSE	1.06032	8.89002	-5.39577	FALSE	FALSE	9	0.0273392	5.19288	4.52113	0.0521685
1214	107	14	R	80	0	168	107	5.11	4.34	1	lalt	TRUE	0.314517	1	0.116571	FALSE	6.98994	-4.05109	2.93309	FALSE	FALSE	26	0.117358	3.09101	4.49109	0.00976078
1215	107	15	T	40	157	193	131	5.21	4.41	1	ralt	FALSE	0.394632	1	0.124286	FALSE	11.2368	-1.95041	-0.545711	FALSE	FALSE	31	0.0554939	4.17153	4.4808	0.00555351
1216	107	16	I	20	76	154	68	3.7	5.13	1	ralt	FALSE	0.796632	1	0.0525714	FALSE	6.48343	-9.95206	1.32104	FALSE	FALSE	12	0.0380987	4.71411	4.47953	0.00921103
1217	107	17	D	80	75	124	89	4.94	5.43	0	ralt	TRUE	1.06575	1	0.108286	FALSE	-0.441593	2.9447	9.80454	FALSE	FALSE	11	0.0210039	5.5732	4.49056	0.0142854
1218	107	18	I	20	138	154	91	5.09	4.01	0	ralt	TRUE	0.218768	1	0	FALSE	-3.3427	-4.72209	-3.0046	FALSE	FALSE	16	0.0178197	5.81038	4.50435	0.018767
1219	107	19	T	40	76	154	68	5.01	4.24	0	ralt	TRUE	0.187806	1	0	FALSE	7.61664	2.7836	-3.82004	FALSE	FALSE	30	0.0123499	6.33936	4.52396	0.0227113
1220	107	20	I	20	75	124	89	3.63	5.33	0	ralt	TRUE	0.380962	1	0	FALSE	5.35556	3.22401	-5.63611	FALSE	FALSE	17	0.0111186	6.49088	4.54466	0.0262777
1221	107	21	A	40	0	168	107	4.44	5.45	0	ralt	TRUE	0.238148	1	0.132	FALSE	0.633077	14.6463	9.3488	FALSE	FALSE	2	0.0129096	6.27541	4.56254	0.0250901
1222	107	22	O	20	76	154	68	3.92	5.12	0	ralt	TRUE	0.972122	1	0.111429	FALSE	5.10249	-0.533022	0.391278	FALSE	FALSE	18	0.0117111	6.41598	4.58145	0.0238407
1223	107	23	I	20	76	154	68	5.49	3.78	1	ralt	FALSE	0.289244	1	0.328	FALSE	-2.88341	-10.4035	1.49855	FALSE	FALSE	12	0.0505277	4.30678	4.57343	0.0153266
1224	107	24	A	40	76	154	68	5.49	4.94	0	lalt	FALSE	0.890312	1	0	FALSE	9.54637	2.78137	0.0828453	FALSE	FALSE	0	0.00660377	7.24249	4.59944	0.0207341
1225	107	25	O	20	157	193	131	5.45	4.23	0	lalt	FALSE	0.847258	1	0.112857	FALSE	-1.48093	-2.81257	-3.03941	FALSE	FALSE	19	0.0210331	5.57119	4.60796	0.0242303
1226	107	26	T	40	0	168	107	4.3	4.5	0	ralt	TRUE	0.940303	1	0.196857	FALSE	6.36431	-13.0857	14.6401	FALSE	FALSE	32	0.00912964	6.77523	4.62895	0.0200809
1227	107	27	O	20	157	193	131	4.89	4.12	0	ralt	TRUE	0.829401	1	0	FALSE	-2.01078	-2.2877	7.6524	FALSE	FALSE	19	0.0362384	4.78634	4.62724	0.0170048
1228	107	28	I	20	76	154	68	4.36	3.88	1	ralt	FALSE	0.166524	1	0.172286	FALSE	-0.384101	1.05165	-3.89298	FALSE	FALSE	12	0.0622052	4.00682	4.61529	0.00615734
1229	107	29	I	20	157	193	131	5.3	3.64	0	missing	FALSE		1	0	FALSE	-0.0125912	-8.0052	-1.08729	TRUE	TRUE	13	0.0130624	6.25843	4.63075	0.0114635
1230	107	30	D	80	138	154	91	3.74	3.52	1	ralt	FALSE	0.990613	1	0.112	FALSE	3.02639	-17.8299	17.1963	FALSE	FALSE	10	0.101487	3.30064	4.60953	0.0103327
1231	107	31	A	40	138	154	91	5.32	4.46	0	ralt	TRUE	0.719824	1	0	FALSE	-0.0313398	-1.07316	2.52301	FALSE	FALSE	4	0.021684	5.52722	4.61715	0.0069123
1232	107	32	A	40	3	121	112	4.97	4.43	1	lalt	TRUE	1.44582	1	0	FALSE	2.69555	-4.90895	-1.43409	FALSE	FALSE	3	0.0466149	4.42307	4.61149	0.00833036
1233	107	33	A	40	3	121	112	4.37	5.25	1	lalt	TRUE	0.353906	1	0.114	FALSE	14.5904	-45.1466	35.7238	FALSE	FALSE	3	0.060432	4.04854	4.6013	0.0103
1234	107	34	T	40	75	124	89	4.78	4.72	0	lalt	FALSE	0.53397	1	0.211143	FALSE	2.12563	-6.2318	-5.58589	FALSE	FALSE	35	0.012938	6.27224	4.61649	0.0101655
1235	107	35	O	20	75	124	89	5.47	3.51	1	lalt	TRUE	0.858982	1	0.122	FALSE	34.3109	1.93067	-5.62645	FALSE	FALSE	23	0.0592612	4.07677	4.60692	0.0100138
1236	107	36	O	20	75	124	89	3.57	5.32	1	lalt	TRUE	0.195065	1	0	FALSE	2.8937	-1.90962	11.8211	FALSE	FALSE	23	0.072327	3.78932	4.59407	0.00763087
1237	107	37	O	20	75	124	89	4.39	4.6	1	lalt	TRUE	0.110281	1	0	FALSE	9.29997	8.17971	-4.85518	FALSE	FALSE	23	0.0850349	3.5558	4.57868	0.00614259
1238	107	38	D	80	157	193	131	5.35	4.2	0	ralt	TRUE	0.250416	1	0	FALSE	-3.75786	-2.45012	9.27038	FALSE	FALSE	7	0.00229475	8.76745	4.61047	0.0251417
1239	107	39	R	80	75	124	89	5.06	3.93	0	ralt	TRUE	0.0915073	1	0	FALSE	4.65836	3.39934	-5.73143	FALSE	FALSE	29	0.0045283	7.78681	4.63648	0.0392796
1240	107	40	R	80	0	168	107	4.74	4.7	1	ralt	FALSE	0.203637	1	0.129143	FALSE	-0.265082	4.11344	-12.3967	FALSE	FALSE	26	0.0903674	3.46805	4.62012	0.0165151
1241	107	41	R	80	0	168	107	4.54	4.5	1	ralt	FALSE	0.660701	1	0.379429	FALSE	-16.6055	-38.4659	39.5476	FALSE	FALSE	26	0.102181	3.2908	4.60207	0.00444583
1242	107	42	R	80	0	168	107	5.35	5.23	1	lalt	TRUE	0.362796	1	0	FALSE	0.360361	-15.8969	16.2969	FALSE	FALSE	26	0.113691	3.13681	4.58265	0.00382197
1243	107	43	T	40	157	193	131	3.62	3.51	1	ralt	FALSE	0.623791	1	0.114286	FALSE	5.74493	4.99006	-8.78917	FALSE	FALSE	31	0.0484834	4.36637	4.57789	0.00269454
1244	107	44	O	20	75	124	89	3.81	5.12	1	ralt	FALSE	0.0340782	1	0.545714	TRUE	17.5021	5.18432	0.4204	FALSE	FALSE	23	0.0900943	3.47242	4.56317	0.00288057
1245	107	45	A	40	157	193	131	3.52	5.02	0	ralt	TRUE	0.282201	1	0.124	FALSE	-2.38154	37.0453	-2.68761	FALSE	FALSE	1	0.0055905	7.48281	4.58668	0.0129352
1246	107	46	I	20	3	121	112	4.34	4.91	0	ralt	TRUE	0.0553956	1	0.122286	FALSE	3.98117	-3.88111	-3.016	FALSE	FALSE	15	0.00759319	7.04108	4.60672	0.0212646
1247	107	47	D	80	138	154	91	4.49	5.07	1	ralt	FALSE	0.0105148	1	0.205429	FALSE	-1.61568	-0.0324902	-1.17418	FALSE	FALSE	10	0.0927483	3.43053	4.59175	0.0101735
1248	107	48	T	40	157	193	131	5.35	4.17	1	ralt	FALSE	0.678568	1	0.120571	FALSE	11.2201	2.48593	-4.00118	FALSE	FALSE	31	0.0575022	4.12024	4.58466	0.0022987
1249	107	49	T	40	138	154	91	4.26	4.02	0	ralt	TRUE	0.615602	1	0.215143	FALSE	3.21257	0.55255	1.27175	FALSE	FALSE	34	0.00332964	8.23042	4.61139	0.0169875
1250	107	50	A	40	3	121	112	4.01	3.99	1	lalt	TRUE	0.575844	1	0.0282857	FALSE	-4.58691	-7.31303	1.97319	FALSE	FALSE	3	0.0601141	4.05615	4.6036	0.0166971
1251	107	51	I	20	76	154	68	4.89	5.45	1	ralt	FALSE	0.669971	1	0.127714	FALSE	6.56899	-6.37074	-0.520338	FALSE	FALSE	12	0.0572544	4.12647	4.59672	0.00265926
1252	107	52	O	20	75	124	89	3.74	5	1	lalt	TRUE	0.547946	1	0.374857	FALSE	5.55575	6.88846	6.16328	FALSE	FALSE	23	0.0932676	3.42248	4.58267	0.00210789
1253	107	53	R	80	76	154	68	4.93	4.89	0	ralt	TRUE	0.568072	1	0.128571	FALSE	-1.60218	-2.33243	-4.8635	FALSE	FALSE	24	0.00127199	9.61869	4.61396	0.0253365
1254	107	54	A	40	138	154	91	3.86	4.26	0	missing	FALSE		1	0.122	FALSE	34.1237	30.9178	-3.60973	TRUE	TRUE	4	0.0272537	5.19741	4.61759	0.0269981
1255	107	55	R	80	0	168	107	5.32	5.02	1	ralt	FALSE	0.24714	1	0.124857	FALSE	3.09566	-0.594134	-2.1785	FALSE	FALSE	26	0.108439	3.20505	4.60156	0.00325675
1256	107	56	D	80	138	154	91	4.02	3.91	1	ralt	FALSE	0.207181	1	0.111143	FALSE	3.1675	3.86535	-10.2228	FALSE	FALSE	10	0.0945447	3.40286	4.58789	0.00128167
1257	107	57	A	40	3	121	112	5.08	3.93	1	ralt	FALSE	0.256404	1	0.110857	FALSE	7.25296	-3.25084	1.26444	FALSE	FALSE	3	0.0663421	3.91393	4.57962	0.00170056
1258	107	58	I	20	76	154	68	3.65	4.72	1	lalt	TRUE	0.832482	1	0.395429	FALSE	-2.82839	0.858296	-5.54325	FALSE	FALSE	12	0.0636291	3.97417	4.57212	0.00204899
1259	107	59	A	40	3	121	112	5.39	5.01	1	lalt	TRUE	0.295647	1	0.129143	FALSE	2.50211	-1.59064	-13.0652	FALSE	FALSE	3	0.0754717	3.72792	4.56241	0.00187652
1260	107	60	O	20	75	124	89	4.99	3.84	1	ralt	FALSE	0.443744	2	0.118571	FALSE	4.50791	-19.2526	20.4434	FALSE	FALSE	23	0.0959119	3.38215	4.54954	0.00146106
1261	107	61	I	20	76	154	68	4.88	4.5	1	ralt	FALSE	0.335837	2	0.120286	FALSE	0.593176	0.440895	-1.93659	FALSE	FALSE	12	0.0719704	3.79645	4.54092	0.00147471
1262	107	62	T	40	157	193	131	4.77	4.39	1	ralt	FALSE	0.460989	2	0.242571	FALSE	9.24073	10.9362	-12.5918	FALSE	FALSE	31	0.0594917	4.07117	4.53507	0.00188262
1263	107	63	R	80	3	121	112	5.21	5.42	0	missing	FALSE		2	0.124857	FALSE	-0.726177	-1.05228	2.14089	TRUE	TRUE	27	0.00285878	8.45039	4.56074	0.0144298
1264	107	64	R	80	157	193	131	5.2	4.69	0	ralt	TRUE	0.894854	2	0.122571	FALSE	3.25665	1.31782	0.16304	FALSE	FALSE	25	0.00226415	8.78681	4.58734	0.028442
1265	107	65	T	40	157	193	131	5.44	3.64	1	ralt	FALSE	0.172917	2	0.192571	FALSE	-1.34625	-6.68319	3.7506	FALSE	FALSE	31	0.0676256	3.88629	4.57955	0.0158698
1266	107	66	T	40	3	121	112	4.18	3.68	0	ralt	TRUE	0.0970732	2	0.243714	FALSE	0.369773	0.547597	-0.98859	FALSE	FALSE	33	0.026822	5.22044	4.58355	0.00299802
1267	107	67	D	80	157	193	131	4.52	5.08	0	ralt	TRUE	0.110293	2	0.106571	FALSE	-1.30751	3.55931	-2.09075	FALSE	FALSE	7	0.0113574	6.46022	4.59694	0.00672608
1268	107	68	O	20	75	124	89	5.02	5.08	1	missing	FALSE		2	0.0968571	FALSE	6.14323	-9.23246	14.6983	TRUE	TRUE	23	0.0981495	3.34888	4.58446	0.0050655
1269	107	69	A	40	3	121	112	4.66	4.51	1	ralt	FALSE	0.349216	2	0	FALSE	-8.66744	-15.6587	5.54874	FALSE	FALSE	3	0.0778077	3.68394	4.57523	0.00118676
1270	107	70	D	80	157	193	131	4.98	4.28	0	lalt	FALSE	0.66129	2	0.118571	FALSE	-4.25594	-1.46714	0.14824	FALSE	FALSE	7	0.0204699	5.61035	4.58225	0.00325453
1271	107	71	D	80	138	154	91	4.32	3.82	1	lalt	TRUE	0.483392	2	0	FALSE	0.122904	-17.1642	10.231	FALSE	FALSE	10	0.0906366	3.46376	4.57129	0.00310686
1272	107	72	O	20	76	154	68	4.85	5.44	0	ralt	TRUE	0.744568	2	0.116	FALSE	-1.4068	0.0785163	-1.12429	FALSE	FALSE	18	0.0155486	6.00707	4.58119	0.00374588
1273	107	73	O	20	0	168	107	4.6	3.61	0	ralt	TRUE	0.0785831	2	0	FALSE	-1.4653	-4.51032	9.65879	FALSE	FALSE	20	0.00727021	7.10379	4.59811	0.0091326
1274	107	74	O	20	138	154	91	4.82	5.03	0	ralt	TRUE	0.093806	2	0.115429	FALSE	2.44144	5.63575	-4.38769	FALSE	FALSE	22	0.0102916	6.60239	4.61168	0.0103259
1275	107	75	T	40	157	193	131	4.9	4.13	1	ralt	FALSE	0.146878	2	0.126286	FALSE	9.02971	-1.82575	-3.34427	FALSE	FALSE	31	0.0705422	3.82537	4.60393	0.00506131
1276	107	76	A	40	3	121	112	3.7	4.45	1	lalt	TRUE	0.618943	2	0	FALSE	-4.25086	-13.0836	4.86851	FALSE	FALSE	3	0.0818733	3.61046	4.59452	0.00122608
1277	107	77	O	20	75	124	89	3.87	4.11	1	ralt	FALSE	0.127181	2	0.122857	FALSE	2.51448	-2.12072	-0.284473	FALSE	FALSE	23	0.0991818	3.33378	4.58297	0.0009901
1278	107	78	D	80	138	154	91	4.59	4.75	1	lalt	TRUE	0.249376	2	0.127714	FALSE	7.276	2.25479	-5.75088	FALSE	FALSE	10	0.0938431	3.41361	4.57229	0.000891861
1279	107	79	T	40	0	168	107	3.58	4.46	0	ralt	TRUE	0.60446	2	0	FALSE	10.0217	-3.25819	-2.40487	FALSE	FALSE	32	0.0136177	6.19837	4.58304	0.00366954
1280	107	80	O	20	0	168	107	4.9	4.85	0	ralt	TRUE	0.44863	2	0.112	FALSE	6.86522	-4.21575	5.6217	FALSE	FALSE	20	0.0154522	6.01605	4.59241	0.00601552
1281	107	81	D	80	0	168	107	5.3	4.42	0	ralt	TRUE	0.318702	2	0.124571	FALSE	-1.14365	-7.14168	3.49544	FALSE	FALSE	8	0.00241897	8.69139	4.61571	0.0141834
1282	107	82	R	80	0	168	107	5.39	5.02	1	ralt	FALSE	0.351773	2	0.115143	FALSE	7.53562	-12.2775	7.28307	FALSE	FALSE	26	0.0921011	3.44064	4.60535	0.0117221
1283	107	83	O	20	3	121	112	3.57	3.98	0	ralt	TRUE	0.73074	2	0.126	FALSE	7.02256	1.66666	-0.858326	FALSE	FALSE	21	0.00761059	7.03778	4.62065	0.00535554
1284	107	84	A	40	3	121	112	3.69	3.78	1	lalt	TRUE	0.265983	2	0.118571	FALSE	1.1545	4.38857	-7.61151	FALSE	FALSE	3	0.0847484	3.56067	4.61137	0.00534838
1285	107	85	D	80	157	193	131	5.12	3.94	0	ralt	TRUE	0.2372	2	0.116286	FALSE	0.915864	-10.6491	-5.28861	FALSE	FALSE	7	0.0261968	5.25447	4.61499	0.00206247
1286	107	86	T	40	157	193	131	4.21	4.99	1	ralt	FALSE	0.672453	2	0.220857	FALSE	-0.768055	-6.18915	0.961216	FALSE	FALSE	31	0.0723786	3.78829	4.60768	0.00212907
1287	107	87	T	40	75	124	89	5.09	4.61	0	ralt	TRUE	0.411404	2	0.230857	FALSE	19.2405	-25.7507	34.4835	FALSE	FALSE	35	0.0154932	6.01222	4.61643	0.0030715
1288	107	88	A	40	138	154	91	4.38	4.87	0	ralt	TRUE	0.29047	2	0.114	FALSE	9.06101	3.28333	5.41877	FALSE	FALSE	4	0.0278454	5.16642	4.61934	0.00394821
1289	107	89	D	80	75	124	89	4.26	5.25	0	lalt	FALSE	0.394581	2	0.122857	FALSE	1.01809	-16.6849	8.31939	FALSE	FALSE	11	0.0169057	5.88635	4.62708	0.00369509
1290	107	90	T	40	157	193	131	4.35	4.4	1	lalt	TRUE	0.761642	2	0.127429	FALSE	-1.18294	-4.64979	-1.52015	FALSE	FALSE	31	0.0780174	3.68006	4.61911	0.00272076
1291	107	91	I	20	76	154	68	5.32	5.04	1	ralt	FALSE	0.260758	2	0.114857	FALSE	11.9653	-11.5382	0.570186	FALSE	FALSE	12	0.0628436	3.99209	4.61358	0.00105515
1292	107	92	D	80	138	154	91	5.03	4.6	1	lalt	TRUE	0.501755	2	0.125429	FALSE	-4.78708	-5.86795	5.55184	FALSE	FALSE	10	0.0913915	3.4518	4.60415	0.000962818
1293	107	93	O	20	0	168	107	4.98	5.2	0	ralt	TRUE	0.831787	2	0.124	FALSE	2.14418	1.65993	6.69781	FALSE	FALSE	20	0.0216469	5.52969	4.60953	0.00207383
1294	107	94	R	80	0	168	107	3.62	3.87	1	ralt	FALSE	0.79779	2	0.132571	FALSE	16.5923	8.2779	-13.8205	FALSE	FALSE	26	0.0912917	3.45337	4.6003	0.00205294
1295	107	95	T	40	76	154	68	4.23	3.99	0	ralt	TRUE	0.484016	2	0.121714	FALSE	-1.80791	0.168432	0.311063	FALSE	FALSE	30	0.0128187	6.28561	4.61035	0.00303192
1296	107	96	R	80	0	168	107	5	4	1	ralt	FALSE	0.423271	2	0.0657143	FALSE	8.01009	-7.78564	-3.87095	FALSE	FALSE	26	0.0974843	3.35869	4.60057	0.00297668
1297	107	97	A	40	75	124	89	3.68	4.76	0	ralt	TRUE	0.384326	2	0.108857	FALSE	10.7275	7.36468	4.39688	FALSE	FALSE	5	0.0134771	6.21335	4.61009	0.00280792
1298	107	98	I	20	157	193	131	4.82	4.16	0	ralt	TRUE	0.725454	2	0	FALSE	4.30835	-11.4742	12.0229	FALSE	FALSE	13	0.0137989	6.1793	4.61927	0.00485935
1299	107	99	O	20	3	121	112	4.79	4.33	0	ralt	TRUE	0.476494	2	0.458571	TRUE	0.298636	-10.9509	-8.32863	FALSE	FALSE	21	0.014116	6.14652	4.62815	0.0046944
1300	107	100	T	40	157	193	131	5.33	3.87	1	ralt	FALSE	0.774624	2	0.250857	FALSE	0.313257	-0.622107	-0.179425	FALSE	FALSE	31	0.0796337	3.65048	4.62058	0.00269339
1301	107	101	R	80	3	121	112	5.2	3.53	0	ralt	TRUE	0.789686	2	0.475429	TRUE	10.457	2.89107	-2.81381	FALSE	FALSE	27	0.0093651	6.73849	4.63266	0.00361551
1302	107	102	D	80	138	154	91	4.79	3.96	1	lalt	TRUE	0.423817	2	0.854286	TRUE	-1.00552	2.14548	-4.12901	FALSE	FALSE	10	0.0920153	3.44198	4.62374	0.00352389
1303	107	103	R	80	157	193	131	3.54	4.28	0	lalt	FALSE	0.619948	2	0	FALSE	1.03664	-7.63899	8.88277	FALSE	FALSE	25	0.00882313	6.82449	4.63612	0.00362285
1304	107	104	I	20	157	193	131	3.64	4.57	0	ralt	TRUE	0.701145	2	0.228	FALSE	-11.7473	10.4293	-6.36872	FALSE	FALSE	13	0.0203504	5.6188	4.64151	0.00482163
1305	107	105	I	20	138	154	91	4.55	3.5	0	ralt	TRUE	0.624252	2	0.170286	FALSE	14.732	8.94161	-10.8863	FALSE	FALSE	16	0.0139168	6.16703	4.65005	0.00369569
1306	107	106	I	20	76	154	68	4.56	4.67	1	lalt	TRUE	0.847447	2	0.118286	FALSE	2.64066	-3.85472	5.86312	FALSE	FALSE	12	0.0632474	3.98285	4.64488	0.00261924
1307	107	107	R	80	76	154	68	3.55	4.89	0	lalt	FALSE	0.634544	2	0.248286	FALSE	-6.70741	-24.9502	15.4031	FALSE	FALSE	24	0.00778467	7.00515	4.65775	0.00394917
1308	107	108	I	20	0	168	107	5.09	5.09	0	ralt	TRUE	0.375697	2	0.280571	FALSE	-7.08982	-21.209	13.2902	FALSE	FALSE	14	0.00668239	7.22542	4.67153	0.00735083
1309	107	109	I	20	0	168	107	4.36	4.71	0	lalt	FALSE	0.471713	2	0.117714	FALSE	11.412	7.32829	-11.2277	FALSE	FALSE	14	0.0135329	6.20739	4.67991	0.0130139
1310	107	110	D	80	138	154	91	4.4	5.05	1	lalt	TRUE	0.876799	2	0.248571	FALSE	-9.94953	-13.0398	3.05395	FALSE	FALSE	10	0.0938227	3.41392	4.67098	0.00237443
1311	107	111	A	40	3	121	112	4.96	4.95	1	lalt	TRUE	0.246883	2	0.122286	FALSE	23.097	-6.19119	14.0916	FALSE	FALSE	3	0.0759851	3.71814	4.66416	0.000638413
1312	107	112	I	20	76	154	68	4.49	3.76	1	lalt	TRUE	0.313909	2	0.227429	FALSE	13.2171	-2.48344	6.1884	FALSE	FALSE	12	0.0674401	3.89025	4.65852	0.000759505
1313	107	113	D	80	138	154	91	3.89	5.14	1	lalt	TRUE	0.285085	2	0.116286	FALSE	6.64716	4.74807	-11.5573	FALSE	FALSE	10	0.0986451	3.34161	4.64946	0.000657093
1314	107	114	A	40	3	121	112	5.4	4.42	1	lalt	TRUE	0.300225	2	0.356286	FALSE	0.0351958	2.10077	-7.76189	FALSE	FALSE	3	0.0811321	3.62358	4.64231	0.000572421
1315	107	115	O	20	0	168	107	3.64	4.44	0	lalt	FALSE	0.573251	2	0.317714	FALSE	4.8736	5.7712	-6.88137	FALSE	FALSE	20	0.0251156	5.31527	4.64562	0.00140762
1316	107	116	A	40	3	121	112	4.98	4.03	1	lalt	TRUE	0.185457	2	0.0325714	FALSE	8.51664	6.63152	-8.25481	FALSE	FALSE	3	0.0866435	3.52876	4.638	0.00137129
1317	107	117	I	20	76	154	68	4.05	4.1	1	lalt	TRUE	0.341571	2	0.178286	FALSE	-0.676678	-16.2247	21.958	FALSE	FALSE	12	0.0717721	3.80043	4.63218	0.000638432
1318	107	118	R	80	75	124	89	5.29	4.42	0	lalt	FALSE	0.624774	2	0.118857	FALSE	-7.59317	-17.8351	11.7182	FALSE	FALSE	29	0.00869885	6.84496	4.64365	0.00312527
1319	107	119	T	40	157	193	131	4.85	4.04	1	lalt	TRUE	0.969799	2	0.17	FALSE	-1.85477	-3.81449	-6.15621	FALSE	FALSE	31	0.0763238	3.71172	4.63732	0.00307746
1320	107	120	A	40	3	121	112	5.18	5.09	1	lalt	TRUE	0.207045	3	0.236286	FALSE	4.63907	-4.46825	3.1962	FALSE	FALSE	3	0.0908321	3.46065	4.62954	0.000576692
1321	107	121	I	20	76	154	68	5.34	4.68	1	lalt	TRUE	0.650051	3	0.117143	FALSE	-3.46463	-10.8095	14.5592	FALSE	FALSE	12	0.0763129	3.71193	4.62339	0.000569185
1322	107	122	D	80	138	154	91	3.99	4.36	1	lalt	TRUE	0.294126	3	0.118571	FALSE	-7.21215	-3.12656	-8.05496	FALSE	FALSE	10	0.0993551	3.33126	4.61501	0.000536498
1323	107	123	O	20	138	154	91	5.16	4.18	0	ralt	TRUE	0.55926	3	0.116571	FALSE	9.15737	-1.52512	5.04266	FALSE	FALSE	22	0.0134093	6.22062	4.62323	0.00201244
1324	107	124	T	40	0	168	107	4.77	4.44	0	ralt	TRUE	0.333338	3	0.305143	FALSE	4.67487	-14.6645	5.56796	FALSE	FALSE	32	0.0160377	5.96239	4.63002	0.00327631
1325	107	125	D	80	138	154	91	5.18	4.55	1	lalt	TRUE	0.306472	3	0	FALSE	4.5975	-1.61314	-1.3859	FALSE	FALSE	10	0.103715	3.2693	4.62139	0.00169623
1326	107	126	A	40	0	168	107	4.91	3.69	0	ralt	TRUE	0.300482	3	0.609429	TRUE	13.1778	-2.43187	-11.4854	FALSE	FALSE	2	0.0107151	6.54421	4.63105	0.00231586
1327	107	127	I	20	75	124	89	4.43	5.28	0	lalt	FALSE	0.545673	3	0.247714	FALSE	5.14896	-4.2777	13.2238	FALSE	FALSE	17	0.00995486	6.65038	4.64111	0.00432427
1328	107	128	I	20	76	154	68	3.63	5.42	1	lalt	TRUE	0.437722	3	0.154	FALSE	7.86335	2.22351	-4.95175	FALSE	FALSE	12	0.0791532	3.65921	4.63485	0.00248795
1329	107	129	O	20	75	124	89	3.8	5.12	1	lalt	TRUE	0.784816	3	0.199714	FALSE	5.21899	-7.27015	5.4788	FALSE	FALSE	23	0.0739851	3.75662	4.62924	0.00056754
1330	107	130	D	80	76	154	68	4.52	5.05	0	ralt	TRUE	0.406923	3	0.108857	FALSE	-0.163062	-1.41684	0.76	FALSE	FALSE	6	0.008411	6.89351	4.64028	0.00278229
1331	107	131	T	40	157	193	131	4.96	3.53	1	lalt	TRUE	0.934954	3	0.136	FALSE	-10.2206	-13.2957	10.29	FALSE	FALSE	31	0.0768275	3.70223	4.6344	0.00275014
1332	107	132	O	20	75	124	89	5.5	4.23	1	lalt	TRUE	0.732064	3	0.221143	FALSE	7.9316	-0.0503115	-0.826541	FALSE	FALSE	23	0.0786164	3.66903	4.6284	0.00053784
1333	107	133	I	20	76	154	68	4.12	4.16	1	lalt	TRUE	0.768115	3	0.420571	TRUE	-6.26608	-10.8481	7.33061	FALSE	FALSE	12	0.0827286	3.59547	4.62205	0.000509336
1334	107	134	A	40	3	121	112	5.06	4.86	1	lalt	TRUE	0.233293	3	0.233714	FALSE	10.0933	9.81499	-6.26108	FALSE	FALSE	3	0.0892342	3.48626	4.61516	0.000467485
1335	107	135	O	20	75	124	89	3.71	4.15	1	lalt	TRUE	0.537312	3	0.251714	FALSE	5.15797	-2.19538	3.39525	FALSE	FALSE	23	0.0830851	3.58927	4.60893	0.00046078
1336	107	136	R	80	138	154	91	4.26	4.05	0	lalt	FALSE	1.53646	3	0.131714	FALSE	7.4908	-6.37566	6.27904	FALSE	FALSE	28	0.000987275	9.98426	4.62954	0.0106774
1337	107	137	I	20	3	121	112	5.35	4.18	0	ralt	TRUE	0.512586	3	0.129429	FALSE	22.0515	-9.63193	3.82896	FALSE	FALSE	15	0.00937943	6.73628	4.63952	0.0124805
1338	107	138	A	40	0	168	107	4.94	4.92	0	ralt	TRUE	0.318686	3	0.332286	FALSE	8.65381	-2.84198	4.04321	FALSE	FALSE	2	0.0157233	5.99095	4.64592	0.0033926
1339	107	139	R	80	0	168	107	4.99	4.05	1	lalt	TRUE	0.529735	3	0.132571	FALSE	6.74363	4.46972	-3.96618	FALSE	FALSE	26	0.0792453	3.65753	4.64004	0.00153785
1340	107	140	T	40	157	193	131	4.71	4.63	1	lalt	TRUE	0.650831	3	0.255714	FALSE	6.8458	3.85559	-5.49123	FALSE	FALSE	31	0.0785806	3.66968	4.63429	0.000482073
1341	107	141	T	40	157	193	131	5.04	4.11	1	lalt	TRUE	0.280926	3	0.222571	FALSE	12.5066	9.3026	-7.69572	FALSE	FALSE	31	0.0837864	3.57714	4.62811	0.00102759
1342	107	142	T	40	157	193	131	5.09	4.52	1	lalt	TRUE	0.262048	3	0.363714	FALSE	11.3434	3.38991	-8.76383	FALSE	FALSE	31	0.0889336	3.49113	4.62153	0.000950397
1343	107	143	O	20	75	124	89	4.43	4.04	1	lalt	TRUE	1.01006	3	0.304571	FALSE	2.9788	-4.73645	-3.10831	FALSE	FALSE	23	0.0849584	3.5571	4.61538	0.000416192
1344	107	144	D	80	76	154	68	3.59	5.19	0	lalt	FALSE	0.457189	3	0.167429	FALSE	-1.70448	-9.23198	26.6214	FALSE	FALSE	6	0.0133124	6.23109	4.62286	0.00163837
1345	107	145	T	40	157	193	131	3.89	4.75	1	lalt	TRUE	0.274268	3	0.237143	FALSE	2.18203	2.09705	1.19926	FALSE	FALSE	31	0.0929845	3.42687	4.61608	0.00160573
1346	107	146	R	80	0	168	107	4.11	4.64	1	lalt	TRUE	0.445476	3	0.117143	FALSE	-6.16375	-6.99474	10.2311	FALSE	FALSE	26	0.0816919	3.61366	4.61036	0.00040228
1347	107	147	I	20	138	154	91	3.88	4.77	0	ralt	TRUE	1.03555	3	0.213714	FALSE	3.37688	-0.827964	0.493409	FALSE	FALSE	16	0.0161872	5.949	4.61646	0.0013676
1348	107	148	A	40	3	121	112	4.63	5.02	1	lalt	TRUE	0.186738	3	0.146571	FALSE	-1.66844	-2.24076	-2.59246	FALSE	FALSE	3	0.0878794	3.50833	4.61026	0.00134042
1349	107	149	I	20	0	168	107	5.16	4.27	0	lalt	FALSE	0.664688	3	0	FALSE	1.44595	-1.12385	-8.4141	FALSE	FALSE	14	0.0160122	5.96468	4.61638	0.00133367
1350	107	150	T	40	157	193	131	3.91	3.52	1	lalt	TRUE	0.431852	3	0.482857	TRUE	-3.93482	-4.6164	-2.18798	FALSE	FALSE	31	0.0958612	3.38291	4.60959	0.00130561
1351	107	151	R	80	138	154	91	4.71	4.03	0	ralt	TRUE	0.332097	3	0.119714	FALSE	13.1866	12.213	0.556361	FALSE	FALSE	28	0.00625568	7.32062	4.62142	0.00274206
1352	107	152	A	40	157	193	131	5.19	4.6	0	ralt	TRUE	0.280226	3	0.223714	FALSE	-3.15387	-3.00647	15.0591	FALSE	FALSE	1	0.00772782	7.01572	4.63193	0.0046904
1353	107	153	T	40	138	154	91	5.06	4.25	0	ralt	TRUE	0.380217	3	0.224571	FALSE	-20.8194	-30.3344	24.745	FALSE	FALSE	34	0.00678846	7.2027	4.64309	0.00447753
1354	107	154	I	20	76	154	68	5.41	4.46	1	lalt	TRUE	1.01134	3	0.124	FALSE	-1.15268	-17.5183	12.5708	FALSE	FALSE	12	0.0788481	3.66478	4.63774	0.00255135
1355	107	155	A	40	0	168	107	5.23	4.09	0	ralt	TRUE	0.382357	3	0.782	TRUE	3.47479	6.50376	-15.2563	FALSE	FALSE	2	0.0195594	5.67599	4.64224	0.00109287
1356	107	156	D	80	0	168	107	4.08	4.62	0	ralt	TRUE	0.284464	3	0.233714	FALSE	0.196873	10.1533	-8.27966	FALSE	FALSE	8	0.00668239	7.22542	4.65328	0.00320313
1357	107	157	A	40	3	121	112	5.39	5.1	1	lalt	TRUE	0.272648	3	0.262	FALSE	5.25266	8.76185	-5.12796	FALSE	FALSE	3	0.0889628	3.49065	4.6471	0.00248274
1358	107	158	A	40	157	193	131	5.45	3.68	0	ralt	TRUE	0.272587	3	0.724571	TRUE	-14.3563	-15.0295	7.00551	FALSE	FALSE	1	0.0126435	6.30547	4.65428	0.00147189
1359	107	159	O	20	75	124	89	5.05	4.5	1	lalt	TRUE	0.726733	3	0.229714	FALSE	-4.72515	-3.35874	2.24555	FALSE	FALSE	23	0.0831156	3.58874	4.64864	0.00147701
1360	107	160	I	20	157	193	131	5.46	4.39	0	ralt	TRUE	0.486772	3	0.103143	FALSE	-12.4629	-20.8175	21.8945	FALSE	FALSE	13	0.019638	5.6702	4.65297	0.00102477
1361	107	161	I	20	76	154	68	5.04	4.37	1	lalt	TRUE	0.426844	3	0.122571	FALSE	5.78501	2.59627	-2.76718	FALSE	FALSE	12	0.0811225	3.62375	4.64757	0.00102303
1362	107	162	D	80	138	154	91	3.54	4.96	1	lalt	TRUE	0.411927	3	0.228	FALSE	-10.7564	-2.49572	-8.80422	FALSE	FALSE	10	0.0893844	3.48383	4.64154	0.000349944
1363	107	163	T	40	76	154	68	4.8	5.15	0	ralt	TRUE	0.750055	3	0.615143	TRUE	12.533	7.52869	-13.3494	FALSE	FALSE	30	0.0134635	6.2148	4.64822	0.00133177
1364	107	164	A	40	76	154	68	4.87	4.3	0	ralt	TRUE	0.2921	3	0.224857	FALSE	2.53838	1.95602	-3.05654	FALSE	FALSE	0	0.00698113	7.16232	4.65863	0.00323848
1365	107	165	I	20	3	121	112	5.2	4.37	0	ralt	TRUE	0.548176	3	0.234857	FALSE	3.85009	-2.3269	-1.04496	FALSE	FALSE	15	0.013048	6.26003	4.66536	0.00324591
1366	107	166	O	20	3	121	112	4.16	5.26	0	ralt	TRUE	0.402183	3	0.118857	FALSE	-2.42539	-5.07637	8.04892	FALSE	FALSE	21	0.0143845	6.11935	4.67144	0.00224176
1367	107	167	O	20	75	124	89	5.33	3.59	1	lalt	TRUE	0.396348	3	0.114	FALSE	-4.32449	-6.96914	-0.322165	FALSE	FALSE	23	0.0847662	3.56037	4.66581	0.00122915
1368	107	168	A	40	75	124	89	4.36	3.79	0	ralt	TRUE	0.314468	3	0.234857	FALSE	2.29603	1.31101	-2.53188	FALSE	FALSE	5	0.0136885	6.19089	4.67213	0.00126346
1369	107	169	A	40	157	193	131	4.97	4.36	0	ralt	TRUE	0.311662	3	0.118	FALSE	4.79147	4.59895	-12.6261	FALSE	FALSE	1	0.0168431	5.8917	4.67714	0.00198635
1370	107	170	O	20	75	124	89	5.06	3.98	1	lalt	TRUE	0.592739	3	0.58	TRUE	7.76492	14.4961	0.708647	FALSE	FALSE	23	0.0883862	3.50004	4.67128	0.00104407
1371	107	171	T	40	76	154	68	4.87	3.96	0	ralt	TRUE	0.421796	3	0.237429	FALSE	1.97019	5.79942	1.77643	FALSE	FALSE	30	0.0177741	5.81408	4.67593	0.000987146
1372	107	172	T	40	157	193	131	3.82	4.56	1	lalt	TRUE	0.42697	3	0.210571	FALSE	-2.65385	-6.84066	0.65892	FALSE	FALSE	31	0.0905298	3.46546	4.66997	0.000976694
1373	107	173	A	40	3	121	112	3.52	5.43	1	lalt	TRUE	0.229124	3	0.117429	FALSE	-7.32576	-3.54402	0.657667	FALSE	FALSE	3	0.0869369	3.52389	4.66434	0.0002991
1374	107	174	R	80	138	154	91	4.19	5.13	0	ralt	TRUE	0.352236	3	0.646	TRUE	0.530401	10.8731	-22.1001	FALSE	FALSE	28	0.0103324	6.59668	4.67214	0.00149703
1375	107	175	T	40	138	154	91	4.83	3.96	0	ralt	TRUE	0.364366	3	0.171429	FALSE	-0.618993	-11.4144	11.2316	FALSE	FALSE	34	0.01082	6.53016	4.67961	0.00261707
1376	107	176	D	80	75	124	89	5.3	4.38	0	ralt	TRUE	0.34448	3	0.129429	FALSE	10.7455	0.807597	24.9201	FALSE	FALSE	11	0.0146849	6.08952	4.68526	0.00222763
1377	107	177	R	80	0	168	107	4.65	4.58	1	lalt	TRUE	0.929502	3	0.36	FALSE	3.58782	27.8181	-10.3013	FALSE	FALSE	26	0.0744973	3.74667	4.68068	0.00112716
1378	107	178	I	20	76	154	68	5.03	3.74	1	lalt	TRUE	0.742571	3	0.217429	FALSE	15.8476	8.61385	-17.4459	FALSE	FALSE	12	0.0793511	3.65561	4.67573	0.000338133
1379	107	179	I	20	0	168	107	3.64	4.28	0	lalt	FALSE	0.863808	3	0.578857	TRUE	7.1507	13.28	-7.36438	FALSE	FALSE	14	0.0184291	5.76187	4.68	0.000910409
1380	107	180	D	80	138	154	91	3.5	5.41	1	lalt	TRUE	0.435988	4	0.195714	FALSE	5.15672	-8.45891	-3.15985	FALSE	FALSE	10	0.0865653	3.53007	4.67454	0.000889171
1381	107	181	O	20	138	154	91	4.01	4.49	0	ralt	TRUE	0.501118	4	0.596286	TRUE	20.1693	-25.2582	13.0228	FALSE	FALSE	22	0.0144335	6.11443	4.6802	0.00107194
1382	107	182	O	20	75	124	89	5.27	3.82	1	lalt	TRUE	0.483261	4	0.315429	FALSE	4.62353	16.9635	-2.29202	FALSE	FALSE	23	0.088108	3.50458	4.67468	0.00106281
1383	107	183	R	80	0	168	107	3.52	4.52	1	lalt	TRUE	0.307373	4	0.321429	FALSE	5.95967	19.1277	38.0963	FALSE	FALSE	26	0.0770225	3.69858	4.67007	0.000298492
1384	107	184	O	20	157	193	131	4.1	4.2	0	ralt	TRUE	0.51753	4	0.247714	FALSE	1.76369	-9.87583	-5.35758	FALSE	FALSE	19	0.0149228	6.06634	4.67549	0.00103665
1385	107	185	O	20	76	154	68	4.86	4.91	0	ralt	TRUE	0.314725	4	0.234571	FALSE	6.60237	-2.28251	-4.73026	FALSE	FALSE	18	0.0121233	6.36608	4.68204	0.0019283
1386	107	186	I	20	76	154	68	5.21	4.13	1	lalt	TRUE	0.290784	4	0.115429	FALSE	4.93529	-42.124	22.1174	FALSE	FALSE	12	0.0809961	3.626	4.67714	0.0011984
1387	107	187	D	80	138	154	91	4.32	3.59	1	lalt	TRUE	0.439886	4	0.13	FALSE	-4.47439	-4.43387	17.5415	FALSE	FALSE	10	0.0883323	3.50091	4.67174	0.000278797
1388	107	188	D	80	0	168	107	4.72	4.57	0	ralt	TRUE	0.269071	4	0.229714	FALSE	2.58353	5.90835	-2.19051	FALSE	FALSE	8	0.010192	6.61641	4.67917	0.00133771
1389	107	189	R	80	76	154	68	3.8	4.36	0	ralt	TRUE	0.294184	4	0	FALSE	-0.0596562	3.55952	-0.662209	FALSE	FALSE	24	0.00939203	6.73435	4.68696	0.002489
1390	107	190	T	40	157	193	131	4.38	3.67	1	lalt	TRUE	1.17931	4	0.477143	TRUE	-4.00497	-1.73166	10.2502	FALSE	FALSE	31	0.0877442	3.51055	4.68163	0.00141181
1391	107	191	A	40	3	121	112	3.63	3.51	1	lalt	TRUE	0.200422	4	0.0788571	FALSE	6.28838	1.83265	-2.57974	FALSE	FALSE	3	0.0844485	3.56578	4.67659	0.00026334
1392	107	192	A	40	3	121	112	4.68	4.5	1	lalt	TRUE	0.242823	4	0.116857	FALSE	-1.49932	-12.3122	-0.872126	FALSE	FALSE	3	0.0884641	3.49876	4.67131	0.000580201
1393	107	193	R	80	76	154	68	5.21	5.44	0	ralt	TRUE	0.419881	4	0.810857	TRUE	7.14586	10.8446	-6.03727	FALSE	FALSE	24	0.0135948	6.2008	4.67705	0.00101224
1394	107	194	O	20	75	124	89	4.3	5.2	1	lalt	TRUE	0.305855	4	0.246	FALSE	-24.467	-14.4569	18.4143	FALSE	FALSE	23	0.0878589	3.50867	4.67186	0.00100782
1395	107	195	T	40	75	124	89	4.21	5.42	0	ralt	TRUE	0.288969	4	0.0908571	FALSE	1.83938	5.78761	-4.44185	FALSE	FALSE	35	0.0125786	6.31288	4.67798	0.00106235
1396	107	196	R	80	0	168	107	5.07	5.26	1	lalt	TRUE	0.301998	4	0.0602857	FALSE	0.29913	11.8857	-6.28466	FALSE	FALSE	26	0.0770169	3.69868	4.67362	0.0010774
1397	107	197	O	20	138	154	91	4.06	4.17	0	ralt	TRUE	0.919004	4	0.119429	FALSE	6.48361	14.5122	-17.6752	FALSE	FALSE	22	0.0177342	5.81732	4.67783	0.000808622
1398	107	198	A	40	75	124	89	5.25	3.92	0	ralt	TRUE	0.317185	4	0.108286	FALSE	0.230737	-3.32576	0.522184	FALSE	FALSE	5	0.0162071	5.94723	4.6825	0.0013831
1399	107	199	I	20	76	154	68	4.38	5.29	1	lalt	TRUE	0.792264	4	0.494286	TRUE	14.1049	13.6234	1.40437	FALSE	FALSE	12	0.0807708	3.63002	4.67789	0.000849375
1400	107	200	I	20	75	124	89	3.85	5.06	0	ralt	TRUE	0.375324	4	0.122571	FALSE	1.57999	0.616398	-4.18553	FALSE	FALSE	17	0.0111129	6.49162	4.68452	0.00114195
1401	107	201	O	20	76	154	68	4.25	4.03	0	ralt	TRUE	0.795397	4	0.198571	FALSE	-5.06943	-11.6029	0.352728	FALSE	FALSE	18	0.0155242	6.00933	4.68934	0.00173831
1402	107	202	D	80	76	154	68	5.4	4.38	0	ralt	TRUE	0.386572	4	0.228857	FALSE	3.14577	2.1421	2.79647	FALSE	FALSE	6	0.0142699	6.13089	4.69458	0.00151632
1403	107	203	T	40	0	168	107	4.68	3.85	0	ralt	TRUE	0.354641	4	0.364286	FALSE	5.38764	5.44436	-5.80176	FALSE	FALSE	32	0.0149207	6.06654	4.69953	0.00153219
1404	107	204	T	40	138	154	91	5.38	4.1	0	ralt	TRUE	0.89075	4	0.282857	FALSE	4.96457	-13.5819	0.648235	FALSE	FALSE	34	0.0136792	6.19187	4.7049	0.00155146
1405	107	205	D	80	0	168	107	4.86	4.57	0	ralt	TRUE	0.346755	4	0.273714	FALSE	8.12069	0.392702	-3.90395	FALSE	FALSE	8	0.0136225	6.19787	4.71026	0.00160577
1406	107	206	R	80	138	154	91	4.57	3.71	0	ralt	TRUE	0.301922	4	0.136857	FALSE	-0.414749	0.187439	-4.48817	FALSE	FALSE	28	0.0130984	6.25447	4.71577	0.00162623
1407	107	207	R	80	0	168	107	3.86	5.31	1	lalt	TRUE	0.442087	4	0.234857	FALSE	6.14155	14.3715	-3.7576	FALSE	FALSE	26	0.0776458	3.68695	4.71142	0.000952882
1408	107	208	A	40	76	154	68	3.9	5.29	0	ralt	TRUE	0.308194	4	0.228286	FALSE	-2.814	-5.72362	0.244491	FALSE	FALSE	0	0.0098206	6.66997	4.71834	0.00119147
1409	107	209	D	80	138	154	91	5.01	4.96	1	lalt	TRUE	0.426215	4	0.336286	FALSE	6.90486	5.64162	-6.94231	FALSE	FALSE	10	0.0844821	3.56521	4.71352	0.00117353
1410	107	210	I	20	138	154	91	4.19	4.15	0	ralt	TRUE	0.429322	4	0.110857	FALSE	0.170665	-6.92494	6.18477	FALSE	FALSE	16	0.0161068	5.95619	4.71788	0.000773191
1411	107	211	I	20	76	154	68	4.07	4.47	1	lalt	TRUE	0.452496	4	0.249714	FALSE	8.80948	-3.70666	-0.36999	FALSE	FALSE	12	0.0808953	3.6278	4.71336	0.000775148
1412	107	212	R	80	0	168	107	5.18	4.49	1	lalt	TRUE	0.298637	4	0.361429	FALSE	2.72284	6.91927	-3.51073	FALSE	FALSE	26	0.0801126	3.64183	4.70892	0.000239262
1413	107	213	T	40	3	121	112	5.21	4.77	0	ralt	TRUE	0.290711	4	0.220857	FALSE	0.706107	-5.36733	0.608879	FALSE	FALSE	33	0.0150034	6.05857	4.71362	0.00080784
1414	107	214	T	40	157	193	131	3.72	4.33	1	lalt	TRUE	0.550733	4	0.279714	FALSE	-2.50203	5.83726	-4.11191	FALSE	FALSE	31	0.0833208	3.58518	4.709	0.000798336
1415	107	215	R	80	0	168	107	3.52	4.94	1	lalt	TRUE	0.305916	4	0.233429	FALSE	-5.55263	-20.3885	20.923	FALSE	FALSE	26	0.0831391	3.58833	4.70443	0.000224626
1416	107	216	R	80	157	193	131	3.91	5.41	0	ralt	TRUE	0.371077	4	0.236286	FALSE	2.20458	-15.8043	18.1268	FALSE	FALSE	25	0.00883498	6.82256	4.71169	0.00121216
1417	107	217	T	40	157	193	131	4.95	4.47	1	lalt	TRUE	0.254204	4	0.18	FALSE	-1.23185	-0.259069	-2.18857	FALSE	FALSE	31	0.0862853	3.53474	4.70694	0.00120175
1418	107	218	I	20	3	121	112	4.18	4.5	0	ralt	TRUE	0.941194	4	0.275714	FALSE	-0.163121	-7.41339	3.35964	FALSE	FALSE	15	0.0142624	6.13164	4.71182	0.000800588
1419	107	219	A	40	76	154	68	4.99	4.5	0	ralt	TRUE	0.284305	4	0.226571	FALSE	2.37757	-6.54388	7.38022	FALSE	FALSE	0	0.0133185	6.23042	4.717	0.00142894
1420	107	220	R	80	75	124	89	5.24	4.58	0	ralt	TRUE	0.279524	4	0.244571	FALSE	-2.67558	-1.83308	-6.39501	FALSE	FALSE	29	0.00913915	6.77372	4.72396	0.00176956
1421	107	221	A	40	3	121	112	3.72	4.06	1	lalt	TRUE	0.266515	4	0.244	FALSE	6.88361	-2.79401	-2.13193	FALSE	FALSE	3	0.0823728	3.60169	4.71949	0.00114033
1422	107	222	I	20	75	124	89	3.91	3.79	0	ralt	TRUE	1.0627	4	0.296857	FALSE	-1.60027	-6.53683	5.74908	FALSE	FALSE	17	0.0140412	6.15419	4.72433	0.000792766
1423	107	223	A	40	3	121	112	4.96	4.91	1	lalt	TRUE	0.299895	4	0.187143	FALSE	13.9757	14.1428	-13.0555	FALSE	FALSE	3	0.0855977	3.54628	4.71969	0.000784148
1424	107	224	D	80	3	121	112	3.88	4.08	0	ralt	TRUE	0.350951	4	0.250571	FALSE	-2.78515	-6.2189	0.629606	FALSE	FALSE	9	0.00899855	6.79609	4.72661	0.00112201
1425	107	225	R	80	0	168	107	4.72	5.05	1	lalt	TRUE	2.20602	4	0.245429	FALSE	-7.57692	-10.0063	11.8552	FALSE	FALSE	26	0.0837852	3.57716	4.72211	0.00111956
1426	107	226	T	40	75	124	89	4.04	4.94	0	ralt	TRUE	0.385082	4	0.121429	FALSE	3.2624	1.42551	-1.7342	FALSE	FALSE	35	0.0149071	6.06786	4.72659	0.000730611
1427	107	227	R	80	75	124	89	5.35	4.89	0	ralt	TRUE	0.260211	4	0.221143	FALSE	4.45884	6.43621	-4.98847	FALSE	FALSE	29	0.0126982	6.29923	4.73181	0.00135181
1428	107	228	R	80	0	168	107	4.03	3.75	1	lalt	TRUE	0.306227	4	0.148571	FALSE	3.84917	6.95475	-6.87129	FALSE	FALSE	26	0.0866209	3.52914	4.72717	0.00082012
1429	107	229	R	80	3	121	112	4.63	3.66	0	ralt	TRUE	0.28944	4	0.112286	FALSE	-1.8556	22.4635	-15.5125	FALSE	FALSE	27	0.00861517	6.85891	4.73415	0.00112054
1430	107	230	D	80	138	154	91	4.32	4.6	1	lalt	TRUE	0.589605	4	0.236571	FALSE	5.24893	34.2842	-5.61287	FALSE	FALSE	10	0.0815719	3.61578	4.72985	0.00112268
1431	107	231	R	80	0	168	107	5.46	3.94	1	lalt	TRUE	0.247739	4	0.296	FALSE	-4.92319	-16.3804	20.3105	FALSE	FALSE	26	0.089393	3.48369	4.72509	0.000193038
1432	107	232	O	20	75	124	89	5.07	4.97	1	lalt	TRUE	0.275797	4	0.129143	FALSE	3.78095	-2.66086	-12.1757	FALSE	FALSE	23	0.0791326	3.65958	4.72102	0.000195244
1433	107	233	D	80	138	154	91	4.34	3.9	1	lalt	TRUE	0.693773	4	0.239429	FALSE	-4.13816	-9.76432	11.1148	FALSE	FALSE	10	0.0843796	3.56696	4.71664	0.000200278
1434	107	234	R	80	157	193	131	4.98	3.62	0	ralt	TRUE	0.44301	4	0.239714	FALSE	4.71487	0.0260361	1.08047	FALSE	FALSE	25	0.0119497	6.38688	4.72206	0.000827038
1435	107	235	D	80	3	121	112	3.73	3.56	0	ralt	TRUE	0.427154	4	0.238	FALSE	0.924578	4.09332	-4.09922	FALSE	FALSE	9	0.0123233	6.34246	4.7273	0.00143391
1436	107	236	O	20	3	121	112	4.95	5.36	0	ralt	TRUE	0.317323	4	0.236	FALSE	-3.37596	-3.67658	-0.167721	FALSE	FALSE	21	0.014359	6.1219	4.7318	0.00130858
1437	107	237	D	80	138	154	91	4.49	5.04	1	lalt	TRUE	0.427388	4	0.123143	FALSE	-5.20794	-4.9311	-7.38975	FALSE	FALSE	10	0.0868063	3.52606	4.7273	0.00069387
1438	107	238	R	80	3	121	112	5.42	5.15	0	ralt	TRUE	0.339477	4	0.239143	FALSE	0.755431	1.24359	4.15471	FALSE	FALSE	27	0.0119818	6.38301	4.7326	0.000799158
1439	107	239	I	20	76	154	68	3.6	4.12	1	lalt	TRUE	0.390488	4	0.230286	FALSE	5.6408	4.63462	0.678744	FALSE	FALSE	12	0.076295	3.71227	4.72879	0.00081027
1440	108	0	O	40	138	154	91	5.25	5.36	0	ralt	FALSE	0.584968	1	0.109429	FALSE	-4.4329	-8.29077	3.10858	FALSE	FALSE	22	0.0141509	6.14296	4.52528	0.0243999
1441	108	1	R	80	138	154	91	5	4.37	1	lalt	FALSE	1.58286	1	0.104286	FALSE	4.80609	-6.67648	1.34956	FALSE	FALSE	28	0.130036	2.94302	4.48045	0.0259065
1442	108	2	D	40	3	121	112	4.69	4.38	1	ralt	TRUE	1.48288	1	0	FALSE	20.2033	4.82585	-16.0463	FALSE	FALSE	9	0.0774578	3.69045	4.45501	0.00731113
1443	108	3	R	80	138	154	91	3.72	3.77	1	ralt	TRUE	1.27493	1	0	FALSE	13.5496	4.92349	-5.79199	FALSE	FALSE	28	0.149008	2.74654	4.40981	0.00660447
1444	108	4	A	20	76	154	68	5.22	4.98	1	lalt	FALSE	0.963031	1	0.0962857	FALSE	3.28813	-9.48697	-8.76915	FALSE	FALSE	0	0.0509434	4.29496	4.39996	0.00858397
1445	108	5	R	80	75	124	89	5.15	3.76	0	ralt	FALSE	1.598	1	0.0908571	FALSE	1.3711	-6.40993	3.68503	FALSE	FALSE	29	0.00966406	6.69315	4.42892	0.0316811
1446	108	6	D	40	3	121	112	3.51	4.65	1	ralt	TRUE	1.39705	1	0.197714	FALSE	1.71107	-2.12487	-3.88854	FALSE	FALSE	9	0.0938904	3.41288	4.40175	0.0277755
1447	108	7	D	40	3	121	112	4.67	5.16	1	ralt	TRUE	0.920185	1	0	FALSE	-2.11884	-7.0042	-4.01905	FALSE	FALSE	9	0.114963	3.12076	4.3699	0.0128311
1448	108	8	R	80	138	154	91	3.92	5.12	1	ralt	TRUE	0.868204	1	0.615714	TRUE	5.23645	23.8841	-13.1815	FALSE	FALSE	28	0.154803	2.6915	4.33072	0.00382126
1449	108	9	A	20	76	154	68	5.16	3.88	1	lalt	FALSE	1.02719	1	0.109429	FALSE	-1.08664	-5.23074	11.0426	FALSE	FALSE	0	0.0675052	3.88886	4.31679	0.0054666
1450	108	10	R	80	76	154	68	4.15	5.16	0	lalt	TRUE	1.19031	1	0.102	FALSE	7.28154	-15.3367	0.172507	FALSE	FALSE	24	0.00369155	8.08156	4.35861	0.0418337
1451	108	11	A	20	138	154	91	3.62	4.25	0	ralt	FALSE	0.761376	1	0.115714	FALSE	-0.920655	-13.3186	5.04594	FALSE	FALSE	4	0.014452	6.11258	4.37985	0.0521379
1452	108	12	I	20	157	193	131	4.31	3.76	0	ralt	FALSE	1.3715	1	0.100857	FALSE	18.1861	7.48512	-15.6023	FALSE	FALSE	13	0.0224057	5.47999	4.39187	0.0248034
1453	108	13	I	20	75	124	89	5.35	4.23	1	lalt	FALSE	1.27659	1	0.112286	FALSE	0.304321	-4.17199	-1.50952	FALSE	FALSE	17	0.0346554	4.85078	4.39415	0.0165245
1454	108	14	A	20	76	154	68	3.53	4.05	1	ralt	TRUE	1.07262	1	0.118286	FALSE	26.9487	16.5423	-13.3692	FALSE	FALSE	0	0.0807547	3.63031	4.37621	0.00915862
1455	108	15	A	20	3	121	112	4.85	5.26	0	ralt	FALSE	1.14578	1	0.149143	FALSE	-10.8765	-21.2571	11.6677	FALSE	FALSE	3	0.0166482	5.90849	4.39376	0.0142706
1456	108	16	O	40	0	168	107	4.15	4.32	1	lalt	FALSE	0.861773	1	0	FALSE	5.72114	-19.0231	3.7277	FALSE	FALSE	20	0.0598694	4.06204	4.3838	0.0148665
1457	108	17	I	20	3	121	112	5.19	5.29	0	ralt	FALSE	0.977869	1	0.115714	FALSE	21.1717	12.483	-15.8399	FALSE	FALSE	15	0.0160199	5.96399	4.40158	0.0146109
1458	108	18	R	80	138	154	91	4.09	4.66	1	ralt	TRUE	0.870831	1	0.109429	FALSE	2.72041	-14.3539	12.0641	FALSE	FALSE	28	0.144654	2.78932	4.37089	0.0121528
1459	108	19	T	80	157	193	131	4.45	5.06	1	lalt	FALSE	1.00792	1	0.224286	FALSE	14.3644	10.2576	-13.524	FALSE	FALSE	31	0.0874786	3.51493	4.35333	0.00314921
1460	108	20	T	80	157	193	131	5.01	4.77	1	ralt	TRUE	1.20598	1	0.110857	FALSE	-6.39571	-3.73569	4.41618	FALSE	FALSE	31	0.103774	3.26849	4.33246	0.00839756
1461	108	21	R	80	3	121	112	3.53	4.41	0	lalt	TRUE	1.02387	1	0	FALSE	20.3149	6.64641	-6.89561	FALSE	FALSE	27	0.00496525	7.65392	4.36658	0.0245114
1462	108	22	O	40	138	154	91	4.82	4.54	0	ralt	FALSE	1.52804	1	0.116	FALSE	-13.5709	-1.32541	1.52316	FALSE	FALSE	22	0.0260247	5.26397	4.37526	0.0288575
1463	108	23	I	20	75	124	89	4.59	4.64	1	ralt	TRUE	1.10406	1	0.123714	FALSE	9.44284	15.0113	-13.598	FALSE	FALSE	17	0.0457307	4.45069	4.37273	0.00979621
1464	108	24	D	40	3	121	112	3.57	4.63	1	ralt	TRUE	0.384191	1	0.108571	FALSE	16.3128	10.4546	-7.69505	FALSE	FALSE	9	0.0990566	3.3356	4.35404	0.00501756
1465	108	25	R	80	138	154	91	5.27	3.93	1	lalt	FALSE	1.11127	1	0.214857	FALSE	-2.79063	-3.74084	5.97165	FALSE	FALSE	28	0.144448	2.79138	4.32775	0.00236214
1466	108	26	A	20	3	121	112	5.41	4	0	lalt	TRUE	0.702345	1	0	FALSE	15.3238	4.70708	-11.2995	FALSE	FALSE	3	0.0298235	5.06741	4.33437	0.00581568
1467	108	27	R	80	157	193	131	4.17	5.43	0	ralt	FALSE	0.887388	1	0.178	FALSE	13.9584	3.5422	-15.3562	FALSE	FALSE	25	0.000898474	10.1202	4.37779	0.0516703
1468	108	28	D	40	0	168	107	4.71	4.36	0	lalt	TRUE	0.762415	1	0.121429	FALSE	2.59567	1.89372	1.19848	FALSE	FALSE	8	0.00884434	6.82103	4.40237	0.0589209
1469	108	29	R	80	138	154	91	4.67	3.56	1	ralt	TRUE	0.757496	1	0.116857	FALSE	4.913	4.99123	-4.91833	FALSE	FALSE	28	0.150943	2.72792	4.37609	0.0133788
1470	108	30	A	20	0	168	107	4.32	3.8	0	lalt	TRUE	0.912624	1	0.109429	FALSE	1.97927	6.54893	-2.34207	FALSE	FALSE	2	0.0137221	6.18735	4.39429	0.00939933
1471	108	31	O	40	138	154	91	4.23	5	0	ralt	FALSE	0.921771	1	0.113714	FALSE	4.66427	-5.30529	-3.81018	FALSE	FALSE	22	0.0374542	4.73873	4.39576	0.011981
1472	108	32	R	80	157	193	131	4.17	5.46	0	lalt	TRUE	0.874808	1	0.0851429	FALSE	10.8142	4.57395	-9.12861	FALSE	FALSE	25	0.0155383	6.00803	4.41155	0.0108137
1473	108	33	I	20	75	124	89	4.6	3.95	1	ralt	TRUE	0.768847	1	0.115143	FALSE	-2.36916	-0.234041	3.60149	FALSE	FALSE	17	0.0535958	4.22174	4.40642	0.00958363
1474	108	34	O	40	75	124	89	4.27	4.65	0	lalt	TRUE	0.713948	1	0.107429	FALSE	-3.32987	-16.7039	12.5438	FALSE	FALSE	23	0.0097035	6.68728	4.42813	0.0125096
1475	108	35	A	20	3	121	112	5.25	3.73	0	lalt	TRUE	0.532084	1	0	FALSE	-7.14047	3.87175	4.74068	FALSE	FALSE	3	0.0401276	4.63926	4.42803	0.0130156
1476	108	36	O	40	0	168	107	4.55	3.58	1	lalt	FALSE	0.586107	1	0.111143	FALSE	-1.15767	-8.32355	0.849263	FALSE	FALSE	20	0.0571279	4.12966	4.42185	0.0047984
1477	108	37	R	80	3	121	112	3.59	5.16	0	lalt	TRUE	0.643327	1	0.0357143	FALSE	5.25816	-14.0093	0.319936	FALSE	FALSE	27	0.0175756	5.83028	4.43487	0.00781582
1478	108	38	R	80	138	154	91	4.35	4.86	1	ralt	TRUE	0.614448	1	0	FALSE	9.75492	-8.37806	-8.03079	FALSE	FALSE	28	0.146099	2.77498	4.412	0.00641323
1479	108	39	I	20	157	193	131	5.02	3.75	0	ralt	FALSE	0.939483	1	0.141429	FALSE	10.8798	4.15282	-8.05139	FALSE	FALSE	13	0.027673	5.17538	4.41819	0.00432026
1480	108	40	D	40	3	121	112	5.14	3.77	1	ralt	TRUE	0.309634	1	0.127143	FALSE	-5.19178	-5.00733	5.19403	FALSE	FALSE	9	0.0913605	3.45229	4.40448	0.00471856
1481	108	41	A	20	138	154	91	4.89	3.76	0	lalt	TRUE	0.720643	1	0.117714	FALSE	22.9459	8.87111	-6.85252	FALSE	FALSE	4	0.0218084	5.51897	4.41424	0.0054455
1482	108	42	O	40	0	168	107	3.77	4.09	1	lalt	FALSE	1.03581	1	0.106286	FALSE	-0.454392	5.62927	-8.51828	FALSE	FALSE	20	0.0655539	3.93117	4.40656	0.00580614
1483	108	43	R	80	138	154	91	3.53	4.85	1	ralt	TRUE	0.374993	1	0.118	FALSE	-3.57252	-0.667481	0.864603	FALSE	FALSE	28	0.14951	2.74168	4.38512	0.00194279
1484	108	44	O	40	0	168	107	3.76	4.98	1	lalt	FALSE	0.356159	1	0.119143	FALSE	20.2189	14.2017	-13.4823	FALSE	FALSE	20	0.0764151	3.71	4.37551	0.00166966
1485	108	45	I	20	76	154	68	3.58	4.76	0	lalt	TRUE	0.695269	1	0	FALSE	4.97595	-5.71987	-7.214	FALSE	FALSE	12	0.0125786	6.31288	4.39255	0.00762624
1486	108	46	R	80	138	154	91	5.21	5.09	1	ralt	TRUE	1.20431	1	0.106	FALSE	3.40219	-6.23598	20.5119	FALSE	FALSE	28	0.156236	2.6782	4.37134	0.0068511
1487	108	47	A	20	76	154	68	5.46	4.63	1	lalt	FALSE	0.542396	1	0.114286	FALSE	-0.834465	-5.30974	0.142019	FALSE	FALSE	0	0.0606956	4.04226	4.36592	0.00183983
1488	108	48	D	40	76	154	68	4.3	4.14	0	lalt	TRUE	0.38337	1	0	FALSE	9.33833	-16.1014	2.83384	FALSE	FALSE	6	0.00673854	7.21335	4.38945	0.0112535
1489	108	49	T	80	157	193	131	4	4.47	1	ralt	TRUE	0.733548	1	0.115143	FALSE	11.8032	-0.601906	2.4429	FALSE	FALSE	31	0.0801332	3.64146	4.37967	0.0107381
1490	108	50	D	40	76	154	68	4.32	4.47	0	lalt	TRUE	0.484685	1	0.0582857	FALSE	10.9643	16.3036	-22.5646	FALSE	FALSE	6	0.0182097	5.77915	4.39142	0.00520459
1491	108	51	R	80	138	154	91	5.13	4.49	1	ralt	TRUE	0.675799	1	0.104571	FALSE	6.7595	10.8229	0.416917	FALSE	FALSE	28	0.158751	2.65516	4.37121	0.004581
1492	108	52	A	20	76	154	68	4.26	3.64	1	ralt	TRUE	0.882835	1	0.111429	FALSE	5.15499	4.40054	-2.13149	FALSE	FALSE	0	0.0686106	3.86542	4.36434	0.00147722
1493	108	53	I	20	157	193	131	4.67	4.3	0	ralt	FALSE	0.670001	1	0.235714	FALSE	6.11891	-4.22237	-3.32497	FALSE	FALSE	13	0.0345559	4.85493	4.36752	0.00326031
1494	108	54	T	80	138	154	91	4.79	3.81	0	lalt	TRUE	0.846067	1	0.119429	FALSE	6.01337	6.29288	8.06884	FALSE	FALSE	34	0.00251572	8.63481	4.39751	0.0189779
1495	108	55	A	20	76	154	68	4.95	3.51	1	lalt	FALSE	0.590197	1	0.498571	TRUE	-9.04996	-3.1631	-7.57059	FALSE	FALSE	0	0.0773378	3.69268	4.38887	0.0175295
1496	108	56	A	20	0	168	107	4.09	3.71	0	lalt	TRUE	0.731333	1	0.116857	FALSE	-7.88558	-10.0365	14.3988	FALSE	FALSE	2	0.0207137	5.59327	4.3984	0.00421613
1497	108	57	I	20	75	124	89	4.21	4.34	1	lalt	FALSE	0.637516	1	0.243714	FALSE	7.97348	-2.83023	-11.4978	FALSE	FALSE	17	0.0505173	4.30708	4.39598	0.00466122
1498	108	58	D	40	3	121	112	3.93	4.48	1	ralt	TRUE	0.280664	1	0.114	FALSE	-8.9288	1.04153	-5.79145	FALSE	FALSE	9	0.0845042	3.56483	4.3864	0.00210625
1499	108	59	O	40	0	168	107	5.26	4.37	1	lalt	FALSE	0.592796	1	0.130286	FALSE	3.48473	0.824262	-18.5882	FALSE	FALSE	20	0.0748759	3.73936	4.37872	0.00160113
1500	108	60	D	40	3	121	112	4.55	4.15	1	ralt	TRUE	1.13711	2	0	FALSE	-10.1326	-0.540534	20.3655	FALSE	FALSE	9	0.0931604	3.42414	4.36816	0.00149085
1501	108	61	I	20	75	124	89	3.69	5.02	1	ralt	TRUE	0.699199	2	0.110571	FALSE	7.9504	18.5063	-5.03903	FALSE	FALSE	17	0.0587434	4.08943	4.36417	0.00171159
1502	108	62	R	80	0	168	107	3.8	4.17	0	lalt	TRUE	0.44136	2	0.101714	FALSE	6.78293	8.29804	-11.7584	FALSE	FALSE	26	0.00288795	8.43574	4.39168	0.0145985
1503	108	63	I	20	0	168	107	5.45	4.69	0	ralt	FALSE	0.695531	2	0.212857	FALSE	-1.74765	-1.08253	-4.18539	FALSE	FALSE	14	0.00628931	7.31288	4.41297	0.0212536
1504	108	64	O	40	76	154	68	5	5.08	0	lalt	TRUE	0.881509	2	0	FALSE	-4.03059	-2.1534	4.49916	FALSE	FALSE	18	0.00679245	7.20185	4.43323	0.0150566
1505	108	65	D	40	138	154	91	3.97	4.23	0	lalt	TRUE	0.34956	2	0.107143	FALSE	-1.8732	-9.06359	-0.0642054	FALSE	FALSE	10	0.0050439	7.63124	4.4556	0.0161183
1506	108	66	I	20	76	154	68	4.07	5.05	0	ralt	FALSE	0.922662	2	0.198571	FALSE	6.76435	2.78514	-9.34097	FALSE	FALSE	12	0.0197928	5.65888	4.46435	0.0116884
1507	108	67	O	40	3	121	112	3.91	5.03	0	lalt	TRUE	0.620749	2	0.198857	FALSE	10.3716	19.1192	-7.54566	FALSE	FALSE	21	0.00549551	7.50753	4.48544	0.0109425
1508	108	68	O	40	157	193	131	5.08	3.69	0	ralt	FALSE	0.692836	2	0.174571	FALSE	6.89643	3.87609	-5.10693	FALSE	FALSE	19	0.00435414	7.8434	4.50796	0.0174224
1509	108	69	I	20	75	124	89	4.61	4.54	1	ralt	TRUE	0.675932	2	0.0908571	FALSE	12.8664	26.6286	-3.17755	FALSE	FALSE	17	0.0637916	3.97049	4.50198	0.0101495
1510	108	70	O	40	3	121	112	3.77	5.22	0	lalt	TRUE	0.547042	2	0	FALSE	5.9333	-12.9936	1.87506	FALSE	FALSE	21	0.0147739	6.0808	4.5132	0.00430659
1511	108	71	O	40	157	193	131	5.24	3.82	0	ralt	FALSE	0.768108	2	0.111714	FALSE	6.42711	10.0378	-11.5119	FALSE	FALSE	19	0.0135779	6.2026	4.5251	0.00712015
1512	108	72	D	40	157	193	131	4.29	5.27	0	ralt	FALSE	1.27715	2	0.376286	FALSE	8.2424	11.5473	-15.4982	FALSE	FALSE	7	0.00786164	6.99095	4.54197	0.00933347
1513	108	73	T	80	157	193	131	3.96	4.52	1	ralt	TRUE	0.846185	2	0.198286	FALSE	13.268	-0.0747957	-2.91284	FALSE	FALSE	31	0.0716635	3.80262	4.53451	0.0063238
1514	108	74	T	80	3	121	112	5.44	4.83	0	lalt	TRUE	0.291321	2	0.0245714	FALSE	18.1021	12.1497	-2.57878	FALSE	FALSE	33	0.00154374	9.33936	4.56151	0.0169073
1515	108	75	R	80	138	154	91	5.41	4.39	1	ralt	TRUE	0.639325	2	0.0737143	FALSE	4.50433	-10.0729	-0.135279	FALSE	FALSE	28	0.133435	2.90579	4.54636	0.0163924
1516	108	76	O	40	3	121	112	4.23	4.97	0	lalt	TRUE	0.408382	2	0.200857	FALSE	6.82804	-3.33915	2.94933	FALSE	FALSE	21	0.0229111	5.44781	4.55217	0.00240875
1517	108	77	T	80	157	193	131	4.87	4.22	1	lalt	FALSE	0.738451	2	0.109143	FALSE	-3.94438	-14.0458	15.6926	FALSE	FALSE	31	0.0779763	3.68082	4.54389	0.00266412
1518	108	78	T	80	157	193	131	3.55	4.7	1	ralt	TRUE	0.568562	2	0.109143	FALSE	0.138037	-15.4	-0.551444	FALSE	FALSE	31	0.0860642	3.53844	4.53459	0.00243288
1519	108	79	O	40	0	168	107	4.42	3.74	1	ralt	TRUE	1.12968	2	0.214857	FALSE	12.5937	-7.80165	-5.94575	FALSE	FALSE	20	0.0705496	3.82522	4.52779	0.00113317
1520	108	80	A	20	76	154	68	4.89	3.94	1	ralt	TRUE	0.912761	2	0.103143	FALSE	0.854753	12.757	-7.05828	FALSE	FALSE	0	0.0692908	3.85119	4.52132	0.00125436
1521	108	81	O	40	0	168	107	4.2	3.6	1	lalt	FALSE	0.489884	2	0.111429	FALSE	0.841458	-10.0853	1.68577	FALSE	FALSE	20	0.0778907	3.68241	4.51362	0.00116877
1522	108	82	D	40	3	121	112	5.06	4.72	1	ralt	TRUE	0.649091	2	0	FALSE	-15.8154	-6.37894	15.071	FALSE	FALSE	9	0.0842661	3.5689	4.50514	0.00102617
1523	108	83	A	20	76	154	68	4.12	4.41	1	ralt	TRUE	0.590099	2	0.110286	FALSE	-8.72701	3.11161	-1.32053	FALSE	FALSE	0	0.0759474	3.71886	4.498	0.00102448
1524	108	84	A	20	76	154	68	3.78	4.82	1	ralt	TRUE	0.361316	2	0.117143	FALSE	-8.3919	-31.8578	9.22408	FALSE	FALSE	0	0.0836478	3.57953	4.48988	0.00226365
1525	108	85	T	80	157	193	131	3.62	4.66	1	lalt	FALSE	1.07735	2	0.204	FALSE	-2.98455	-15.4082	2.29498	FALSE	FALSE	31	0.0893498	3.48439	4.48116	0.000905175
1526	108	86	O	40	0	168	107	4.09	4.79	1	ralt	TRUE	0.773482	2	0.110571	FALSE	-0.204825	3.61897	-6.5439	FALSE	FALSE	20	0.0828951	3.59257	4.47342	0.000895323
1527	108	87	D	40	75	124	89	4.08	4.07	0	lalt	TRUE	0.602595	2	0.0122857	FALSE	11.6275	-12.7468	-0.328172	FALSE	FALSE	11	0.00460193	7.76354	4.49309	0.00727456
1528	108	88	I	20	75	124	89	3.5	5.05	1	ralt	TRUE	1.3147	2	0.122571	FALSE	-7.00557	-10.4404	6.51279	FALSE	FALSE	17	0.0620816	4.00969	4.48855	0.00738433
1529	108	89	O	40	75	124	89	4.54	5.49	0	lalt	TRUE	0.93882	2	0.171429	FALSE	-0.358378	-9.69275	-6.88666	FALSE	FALSE	23	0.013434	6.21797	4.49944	0.0034119
1530	108	90	T	80	0	168	107	3.76	5.2	0	lalt	TRUE	0.790727	2	0.212857	FALSE	8.11963	-8.58158	18.3327	FALSE	FALSE	32	0.00314465	8.31288	4.5209	0.0112963
1531	108	91	I	20	0	168	107	4.87	5.09	0	ralt	FALSE	1.06288	2	0.221714	FALSE	5.42721	-3.51468	-4.03609	FALSE	FALSE	14	0.0127767	6.29034	4.53184	0.0112938
1532	108	92	R	80	76	154	68	5.31	4.72	0	lalt	TRUE	0.931846	2	0.0977143	FALSE	-15.0883	-14.3976	1.52072	FALSE	FALSE	24	0.00913915	6.77372	4.54546	0.0065317
1533	108	93	O	40	76	154	68	5.37	5.2	0	lalt	TRUE	1.23183	2	0.206286	FALSE	-2.65608	2.84848	18.3071	FALSE	FALSE	18	0.0130174	6.26341	4.55592	0.00639978
1534	108	94	R	80	0	168	107	3.53	4.15	0	lalt	TRUE	0.933752	2	0.112571	FALSE	5.82455	5.0579	-13.0339	FALSE	FALSE	26	0.00986938	6.66283	4.56857	0.00607869
1535	108	95	D	40	157	193	131	3.8	4.08	0	lalt	TRUE	0.400025	2	0.114571	FALSE	0.802661	6.6987	-12.3295	FALSE	FALSE	7	0.0141149	6.14663	4.57803	0.00581494
1536	108	96	I	20	75	124	89	4.87	3.72	1	ralt	TRUE	1.34911	2	0.106	FALSE	7.44507	-1.2508	-8.78152	FALSE	FALSE	17	0.0658948	3.92369	4.57255	0.0029493
1537	108	97	D	40	3	121	112	5.42	3.92	1	ralt	TRUE	0.441244	2	0.109714	FALSE	11.7071	27.0386	8.67646	FALSE	FALSE	9	0.0822812	3.60329	4.56488	0.000911719
1538	108	98	A	20	157	193	131	4.09	3.67	0	lalt	TRUE	0.476263	2	0.0948571	FALSE	15.4969	-8.34161	-0.395514	FALSE	FALSE	1	0.00718108	7.12158	4.57961	0.00457
1539	108	99	T	80	3	121	112	3.55	4.52	0	lalt	TRUE	0.96243	2	0.111714	FALSE	-0.810755	-9.03882	2.79815	FALSE	FALSE	33	0.00866527	6.85054	4.59273	0.00767911
1540	108	100	T	80	157	193	131	3.81	5.06	1	ralt	TRUE	0.539673	2	0.106857	FALSE	6.42767	-16.1164	-2.58189	FALSE	FALSE	31	0.0868479	3.52536	4.58455	0.00386419
1541	108	101	I	20	75	124	89	4.77	5.08	1	ralt	TRUE	0.6417	2	0.227143	FALSE	-3.10945	-8.80557	-4.76323	FALSE	FALSE	17	0.0707891	3.82033	4.57852	0.000798938
1542	108	102	T	80	157	193	131	3.92	5.41	1	ralt	TRUE	1.24875	2	0.870571	TRUE	1.63659	-8.33999	-0.109502	FALSE	FALSE	31	0.0928357	3.42918	4.5699	0.000761751
1543	108	103	R	80	3	121	112	3.87	5.23	0	ralt	FALSE	1.24075	2	0.212857	FALSE	14.7411	10.9871	2.78876	FALSE	FALSE	27	0.0164246	5.928	4.57765	0.00222826
1544	108	104	A	20	76	154	68	3.92	5.41	1	ralt	TRUE	1.2378	2	0	FALSE	3.26726	14.2634	-12.6494	FALSE	FALSE	0	0.078841	3.66491	4.57076	0.00227429
1545	108	105	O	40	0	168	107	4.98	4.74	1	lalt	FALSE	0.777793	2	0.219714	FALSE	-4.03532	-12.5643	-0.612818	FALSE	FALSE	20	0.0788171	3.66535	4.56398	0.000746456
1546	108	106	I	20	75	124	89	3.86	3.83	1	ralt	TRUE	0.595824	2	0.110857	FALSE	6.49206	7.22371	-11.2927	FALSE	FALSE	17	0.0753388	3.73046	4.55773	0.000755924
1547	108	107	R	80	75	124	89	3.56	5.07	0	lalt	TRUE	0.694084	2	0.100286	FALSE	3.65469	12.935	-8.84397	FALSE	FALSE	29	0.00976382	6.67834	4.56954	0.00326191
1548	108	108	I	20	75	124	89	4.22	5.24	1	ralt	TRUE	0.408154	2	0.034	FALSE	10.8947	-10.3585	-5.84508	FALSE	FALSE	17	0.0812369	3.62172	4.56263	0.00320285
1549	108	109	O	40	76	154	68	4.78	5.33	0	ralt	FALSE	0.779258	2	0	FALSE	7.86998	2.68269	53.6702	FALSE	FALSE	18	0.0184776	5.75808	4.5692	0.00192396
1550	108	110	D	40	138	154	91	5.28	4.37	0	lalt	TRUE	0.669244	2	0.0948571	FALSE	6.94145	-11.2591	-12.8952	FALSE	FALSE	10	0.0103386	6.59582	4.58031	0.00420862
1551	108	111	A	20	157	193	131	4.56	4.07	0	lalt	TRUE	1.08717	2	0	FALSE	8.16118	21.1646	-25.367	FALSE	FALSE	1	0.0133487	6.22715	4.58933	0.00469839
1552	108	112	T	80	76	154	68	5.5	4.07	0	lalt	TRUE	0.736378	2	0.119429	FALSE	-2.14961	-14.4904	6.36025	FALSE	FALSE	30	0.00114737	9.76745	4.61194	0.0141763
1553	108	113	T	80	138	154	91	5.13	3.72	0	lalt	TRUE	0.963403	2	0.238571	FALSE	1.3682	-1.61302	4.12938	FALSE	FALSE	34	0.00823097	6.92472	4.62424	0.0151174
1554	108	114	T	80	157	193	131	4.73	4.57	1	lalt	FALSE	0.897478	2	0.103714	FALSE	-1.31082	-1.36043	-2.27336	FALSE	FALSE	31	0.0920755	3.44104	4.6161	0.00334018
1555	108	115	O	40	75	124	89	4.99	5.45	0	lalt	TRUE	0.779512	2	0.101143	FALSE	2.09366	-4.47052	21.9599	FALSE	FALSE	23	0.0177433	5.81658	4.62244	0.00179425
1556	108	116	A	20	76	154	68	3.65	4.53	1	ralt	TRUE	0.349538	2	0.01	FALSE	5.75611	-14.1819	12.226	FALSE	FALSE	0	0.0791956	3.65844	4.61579	0.00183118
1557	108	117	R	80	138	154	91	5.35	3.69	1	ralt	TRUE	0.399695	2	0.0522857	FALSE	10.8991	0.489804	-12.07	FALSE	FALSE	28	0.103342	3.2745	4.60682	0.000546232
1558	108	118	R	80	3	121	112	4.31	5.4	0	lalt	TRUE	0.284776	2	0.116286	FALSE	10.1222	-13.1447	-12.6591	FALSE	FALSE	27	0.0213183	5.55176	4.61165	0.00145939
1559	108	119	T	80	157	193	131	5.24	5.45	1	ralt	TRUE	0.883833	2	0.0105714	FALSE	-4.75877	-35.7996	13.3309	FALSE	FALSE	31	0.0955569	3.3875	4.60353	0.00146973
1560	108	120	I	20	138	154	91	4.88	3.96	0	ralt	FALSE	1.06851	3	0.118857	FALSE	-0.262842	-4.25343	9.21209	FALSE	FALSE	16	0.00471698	7.72792	4.61896	0.00468579
1561	108	121	D	40	3	121	112	4.49	4.13	1	ralt	TRUE	0.274697	3	0.109143	FALSE	1.4729	2.57061	-1.23084	FALSE	FALSE	9	0.0760726	3.71648	4.61291	0.00472737
1562	108	122	T	80	75	124	89	4.82	4.97	0	lalt	TRUE	0.9508	3	0.222571	FALSE	1.75671	-0.0435472	-3.80355	FALSE	FALSE	35	0.00143301	9.44674	4.63361	0.00998147
1563	108	123	D	40	157	193	131	4.03	4.43	0	lalt	TRUE	0.318848	3	0.211429	FALSE	7.25073	11.6452	-14.3932	FALSE	FALSE	7	0.0179186	5.8024	4.63952	0.0109767
1564	108	124	R	80	138	154	91	5.02	5.39	1	ralt	TRUE	1.13803	3	0	FALSE	4.00584	-10.9066	-1.35234	FALSE	FALSE	28	0.105071	3.25057	4.63066	0.00156451
1565	108	125	D	40	157	193	131	4.22	5.17	0	lalt	TRUE	1.08789	3	0.101429	FALSE	3.13814	-18.6112	18.234	FALSE	FALSE	7	0.0239072	5.38641	4.63428	0.00121685
1566	108	126	I	20	3	121	112	4.04	4.75	0	lalt	TRUE	0.581953	3	0.105143	FALSE	0.381112	-10.5394	16.2183	FALSE	FALSE	15	0.0114139	6.45306	4.64342	0.00300249
1567	108	127	T	80	76	154	68	4.28	4.19	0	lalt	TRUE	0.66406	3	0	FALSE	5.23385	0.971265	-4.0585	FALSE	FALSE	30	0.00717676	7.12245	4.65557	0.00492532
1568	108	128	T	80	0	168	107	4.43	4.92	0	lalt	TRUE	0.601203	3	0	FALSE	3.22461	3.42382	-9.79058	FALSE	FALSE	32	0.00851358	6.87602	4.66648	0.00544324
1569	108	129	T	80	138	154	91	5.09	4.76	0	lalt	TRUE	0.969238	3	0.225714	FALSE	-0.579162	-16.207	12.0455	FALSE	FALSE	34	0.0134934	6.2116	4.6741	0.00416331
1570	108	130	T	80	157	193	131	3.76	4.8	1	ralt	TRUE	0.847239	3	0.144857	FALSE	6.09764	-1.00052	-4.52231	FALSE	FALSE	31	0.0952489	3.39215	4.66618	0.00186458
1571	108	131	R	80	157	193	131	3.96	4.45	0	lalt	TRUE	0.844366	3	0.107143	FALSE	11.4186	5.73244	2.71965	FALSE	FALSE	25	0.012315	6.34344	4.67438	0.00197641
1572	108	132	T	80	76	154	68	4.96	4.18	0	lalt	TRUE	0.724482	3	0.123714	FALSE	1.94291	-4.38413	0.498155	FALSE	FALSE	30	0.0129155	6.27475	4.68215	0.00342068
1573	108	133	I	20	75	124	89	3.99	5.47	1	ralt	TRUE	0.629554	3	0.100857	FALSE	4.41759	-10.4609	-2.48379	FALSE	FALSE	17	0.0751368	3.73434	4.67628	0.00193476
1574	108	134	R	80	75	124	89	3.85	5.33	0	lalt	TRUE	0.727612	3	0.168857	FALSE	7.77174	5.35667	-11.392	FALSE	FALSE	29	0.0140954	6.14863	4.68335	0.00178096
1575	108	135	D	40	75	124	89	4.42	4.96	0	lalt	TRUE	0.333707	3	0.110286	FALSE	12.0406	-8.46859	1.41578	FALSE	FALSE	11	0.00915812	6.77073	4.69327	0.00369001
1576	108	136	D	40	76	154	68	5.24	4.73	0	lalt	TRUE	0.320774	3	0.0365714	FALSE	8.4865	7.47495	-3.9089	FALSE	FALSE	6	0.0149188	6.06672	4.69979	0.00357797
1577	108	137	A	20	76	154	68	4.03	3.68	1	lalt	FALSE	0.434709	3	0.128	FALSE	6.51166	7.81335	-14.4685	FALSE	FALSE	0	0.0753626	3.73001	4.69393	0.00165311
1578	108	138	A	20	75	124	89	4.08	4.5	0	lalt	TRUE	0.48895	3	0.153143	FALSE	1.87567	15.5568	-9.51384	FALSE	FALSE	5	0.00325309	8.26397	4.70946	0.00510761
1579	108	139	A	20	76	154	68	3.91	3.58	1	ralt	TRUE	0.566154	3	0.29	FALSE	13.9966	-0.931145	21.4726	FALSE	FALSE	0	0.0802156	3.63997	4.70312	0.00505778
1580	108	140	R	80	157	193	131	3.66	4.21	0	lalt	TRUE	0.53539	3	0.0637143	FALSE	4.83575	-3.70133	-8.92621	FALSE	FALSE	25	0.0173671	5.8475	4.7084	0.00139871
1581	108	141	T	80	157	193	131	4.21	5.47	1	ralt	TRUE	0.409526	3	0	FALSE	4.44306	-4.19103	-1.29995	FALSE	FALSE	31	0.0949792	3.39624	4.70082	0.00134573
1582	108	142	I	20	76	154	68	3.56	5.25	0	lalt	TRUE	1.08959	3	0	FALSE	0.632757	17.8396	-1.68304	FALSE	FALSE	12	0.0169599	5.88173	4.70623	0.0013523
1583	108	143	A	20	76	154	68	4.96	4.1	1	ralt	TRUE	0.464652	3	0	FALSE	-2.97142	5.48894	-8.07623	FALSE	FALSE	0	0.0840097	3.5733	4.6997	0.00137228
1584	108	144	O	40	76	154	68	5.03	5.02	0	lalt	TRUE	0.938679	3	0	FALSE	1	5.95045	3.45601	FALSE	FALSE	18	0.0204403	5.61244	4.70376	0.00116716
1585	108	145	A	20	75	124	89	4.77	5.07	0	lalt	TRUE	0.957732	3	0.102857	FALSE	4.94921	-1.85514	-2.82592	FALSE	FALSE	5	0.00865214	6.85273	4.71348	0.00302096
1586	108	146	T	80	157	193	131	3.56	4.18	1	lalt	FALSE	0.856753	3	0.181714	FALSE	2.09133	-11.8108	8.7552	FALSE	FALSE	31	0.0978644	3.35307	4.70585	0.00223655
1587	108	147	T	80	3	121	112	3.56	5.38	0	lalt	TRUE	0.350977	3	0.0614286	FALSE	4.97784	-3.96131	1.22385	FALSE	FALSE	33	0.0118569	6.39813	4.71349	0.00170984
1588	108	148	T	80	75	124	89	5.38	5.38	0	lalt	TRUE	0.32307	3	0.104571	FALSE	0.154122	-12.0372	7.8794	FALSE	FALSE	35	0.0066653	7.22911	4.72455	0.00404091
1589	108	149	O	40	0	168	107	4.97	4.54	1	lalt	FALSE	0.888966	3	0.231714	FALSE	4.58897	1.6345	-5.26829	FALSE	FALSE	20	0.0654768	3.93287	4.72	0.00276874
1590	108	150	A	20	76	154	68	4.1	5.02	1	ralt	TRUE	0.303111	3	0.107429	FALSE	1.94236	-5.10274	5.86413	FALSE	FALSE	0	0.0862244	3.53576	4.71346	0.000462603
1591	108	151	O	40	75	124	89	4.43	4.86	0	lalt	TRUE	0.645194	3	0.084	FALSE	16.4616	11.2165	-6.25995	FALSE	FALSE	23	0.0196751	5.66748	4.71759	0.00111165
1592	108	152	I	20	138	154	91	4.37	4.01	0	lalt	TRUE	1.11321	3	0.0662857	FALSE	2.27004	17.8822	-5.51229	FALSE	FALSE	16	0.00923324	6.75895	4.72654	0.0027406
1593	108	153	O	40	0	168	107	5.41	4.23	1	ralt	TRUE	1.02432	3	0.289429	FALSE	1.34035	-7.77715	2.72528	FALSE	FALSE	20	0.0693821	3.84929	4.72167	0.00205968
1594	108	154	A	20	0	168	107	3.54	5.47	0	lalt	TRUE	0.461383	3	0.115714	FALSE	13.6733	0.591373	-8.77143	FALSE	FALSE	2	0.0152929	6.03099	4.72737	0.0013733
1595	108	155	O	40	0	168	107	5.38	4.18	1	ralt	TRUE	1.35743	3	0.105143	FALSE	1.33697	6.77814	-3.59586	FALSE	FALSE	20	0.0738911	3.75845	4.72208	0.00134721
1596	108	156	T	80	157	193	131	5.02	4.14	1	ralt	TRUE	0.366482	3	0.108286	FALSE	5.463	4.08084	1.35542	FALSE	FALSE	31	0.0979756	3.35143	4.7148	0.000376039
1597	108	157	O	40	138	154	91	4.3	3.68	0	lalt	TRUE	0.401594	3	0.122	FALSE	-5.39457	-11.4042	9.81198	FALSE	FALSE	22	0.0181836	5.78122	4.71935	0.0010882
1598	108	158	T	80	76	154	68	3.77	3.63	0	lalt	TRUE	0.708772	3	0.0722857	FALSE	11.0784	17.3009	-18.9004	FALSE	FALSE	30	0.0163392	5.93552	4.72454	0.00195038
1599	108	159	D	40	3	121	112	4.23	4.68	1	ralt	TRUE	0.398923	3	0.122	FALSE	-6.39731	-1.99225	8.83972	FALSE	FALSE	9	0.0663764	3.91319	4.72015	0.00125687
1600	108	160	O	40	0	168	107	5.31	5.27	1	ralt	TRUE	0.885024	3	0.218571	FALSE	14.8477	12.2881	0.51243	FALSE	FALSE	20	0.0771082	3.69697	4.71473	0.000438135
1601	108	161	R	80	138	154	91	4.43	3.79	1	ralt	TRUE	0.345051	3	0.12	FALSE	1.67742	4.15283	2.5941	FALSE	FALSE	28	0.0904128	3.46733	4.70825	0.000362631
1602	108	162	I	20	75	124	89	3.54	3.75	1	ralt	TRUE	0.556186	3	0.234571	FALSE	0.763309	-6.94648	-12.0916	FALSE	FALSE	17	0.0691824	3.85345	4.70372	0.000384866
1603	108	163	T	80	157	193	131	3.91	4.03	1	ralt	TRUE	0.846402	3	0.136286	FALSE	0.356096	4.24032	3.81855	FALSE	FALSE	31	0.0995544	3.32837	4.69668	0.000363566
1604	108	164	R	80	76	154	68	4.82	4.58	0	lalt	TRUE	0.79656	3	0.112286	FALSE	7.32711	-6.57259	8.39608	FALSE	FALSE	24	0.0108491	6.52629	4.70435	0.00155227
1605	108	165	I	20	76	154	68	4.01	4.12	0	lalt	TRUE	0.534629	3	0.219429	FALSE	-5.76665	5.00009	-9.25385	FALSE	FALSE	12	0.0199944	5.64426	4.7082	0.00219051
1606	108	166	A	20	3	121	112	4.96	3.82	0	lalt	TRUE	0.56981	3	0.439714	TRUE	-9.51775	-8.31853	4.38329	FALSE	FALSE	3	0.0190547	5.71371	4.71232	0.00160057
1607	108	167	T	80	75	124	89	5.2	4.63	0	lalt	TRUE	0.322931	3	0.160286	FALSE	3.67902	-7.35113	16.7845	FALSE	FALSE	35	0.0109676	6.51061	4.71976	0.00217099
1608	108	168	I	20	75	124	89	4.58	3.54	1	ralt	TRUE	0.391002	3	0.218857	FALSE	7.94466	-4.96386	-5.32658	FALSE	FALSE	17	0.0720496	3.79487	4.71503	0.00155096
1609	108	169	R	80	138	154	91	3.57	5.04	1	lalt	FALSE	0.938135	3	0.23	FALSE	14.19	2.64722	-8.65577	FALSE	FALSE	28	0.0917625	3.44595	4.7087	0.000347511
1610	108	170	D	40	76	154	68	5.04	5	0	lalt	TRUE	0.414268	3	0.114571	FALSE	3.20317	0.181919	-8.1486	FALSE	FALSE	6	0.0173109	5.85218	4.71335	0.00101113
1611	108	171	I	20	0	168	107	4.56	3.68	0	lalt	TRUE	0.806275	3	0.117143	FALSE	12.1851	-9.22338	-4.41481	FALSE	FALSE	14	0.0126698	6.30247	4.71982	0.00200587
1612	108	172	T	80	0	168	107	4.18	5.2	0	lalt	TRUE	1.00839	3	0.184	FALSE	18.6586	4.83112	-9.99537	FALSE	FALSE	32	0.0115203	6.43968	4.7268	0.0023819
1613	108	173	A	20	75	124	89	5.01	4.34	0	lalt	TRUE	0.935429	3	0.0242857	FALSE	5.05471	-7.13154	-1.463	FALSE	FALSE	5	0.0122777	6.34782	4.73334	0.00239399
1614	108	174	O	40	0	168	107	4.88	4.53	1	ralt	TRUE	1.62242	3	0.277143	FALSE	16.0053	11.1485	-5.1285	FALSE	FALSE	20	0.0767296	3.70407	4.72827	0.00132936
1615	108	175	I	20	75	124	89	4.75	3.54	1	ralt	TRUE	0.344485	3	0.123429	FALSE	8.19434	-4.75496	3.07808	FALSE	FALSE	17	0.0743986	3.74858	4.72345	0.000354613
1616	108	176	D	40	75	124	89	5.2	5.27	0	lalt	TRUE	0.44963	3	0.115143	FALSE	5.99252	4.49434	-19.399	FALSE	FALSE	11	0.012104	6.36838	4.73002	0.00132282
1617	108	177	D	40	138	154	91	3.61	4.66	0	lalt	TRUE	0.455646	3	0.220857	FALSE	5.18958	4.98991	-7.76506	FALSE	FALSE	10	0.0117814	6.40735	4.73668	0.00230026
1618	108	178	D	40	3	121	112	5.1	3.91	1	ralt	TRUE	0.737783	3	0.0242857	FALSE	8.85504	-16.464	18.9673	FALSE	FALSE	9	0.0651561	3.93996	4.73275	0.00136034
1619	108	179	O	40	0	168	107	4.3	3.63	1	lalt	FALSE	0.558883	3	0.333714	FALSE	1.60448	7.55897	-22.1019	FALSE	FALSE	20	0.0795963	3.65115	4.72757	0.000363204
1620	108	180	D	40	0	168	107	4.87	5.38	0	lalt	TRUE	0.521194	4	0.114571	FALSE	16.9578	-2.83619	4.29421	FALSE	FALSE	8	0.00725017	7.10777	4.73677	0.001905
1621	108	181	I	20	75	124	89	3.69	4.51	1	ralt	TRUE	0.489152	4	0.178286	FALSE	-0.138566	-9.94436	3.5738	FALSE	FALSE	17	0.0769498	3.69994	4.73184	0.00190117
1622	108	182	D	40	3	121	112	3.5	4.33	1	ralt	TRUE	0.520368	4	0.200857	FALSE	4.4127	7.07515	-14.0494	FALSE	FALSE	9	0.0685477	3.86675	4.72769	0.000348565
1623	108	183	R	80	138	154	91	5.24	3.79	1	ralt	TRUE	0.349547	4	0.217143	FALSE	3.24846	0.444743	-13.0379	FALSE	FALSE	28	0.0904627	3.46653	4.72181	0.000317489
1624	108	184	I	20	3	121	112	5.41	4.72	0	lalt	TRUE	0.582675	4	0.117714	FALSE	11.8454	-11.6412	-2.66147	FALSE	FALSE	15	0.0129503	6.27088	4.7278	0.00113372
1625	108	185	O	40	157	193	131	5.26	3.82	0	lalt	TRUE	0.692653	4	0.293714	FALSE	-4.52236	-14.1555	7.0809	FALSE	FALSE	19	0.0110988	6.49346	4.7346	0.00214187
1626	108	186	D	40	3	121	112	5.08	4.59	1	ralt	TRUE	0.322793	4	0.106	FALSE	-4.12197	-12.9827	15.0623	FALSE	FALSE	9	0.0718171	3.79953	4.73022	0.00130945
1627	108	187	D	40	138	154	91	5.46	5.3	0	lalt	TRUE	0.23483	4	0.329143	FALSE	9.28563	-12.8237	3.58292	FALSE	FALSE	10	0.0157374	5.98966	4.73501	0.000981124
1628	108	188	R	80	138	154	91	4.97	3.62	1	ralt	TRUE	0.756718	4	0.19	FALSE	7.76567	-6.1327	-3.22085	FALSE	FALSE	28	0.0929077	3.42806	4.72907	0.000931653
1629	108	189	A	20	75	124	89	4.35	3.96	0	lalt	TRUE	0.548909	4	0.112286	FALSE	3.79161	2.44086	-4.49665	FALSE	FALSE	5	0.0158491	5.97946	4.73379	0.000915598
1630	108	190	D	40	75	124	89	4.73	3.58	0	lalt	TRUE	0.318011	4	0.218286	FALSE	8.51328	-5.97087	-6.3367	FALSE	FALSE	11	0.0157789	5.98586	4.73851	0.00157935
1631	108	191	D	40	3	121	112	4.3	3.78	1	ralt	TRUE	0.338247	4	0.114286	FALSE	-5.78203	-3.00217	2.0328	FALSE	FALSE	9	0.0746405	3.7439	4.73397	0.000941577
1632	108	192	I	20	3	121	112	3.89	5.09	0	lalt	TRUE	0.667417	4	0.230571	FALSE	9.00981	-2.92736	-3.82311	FALSE	FALSE	15	0.0168818	5.88839	4.73827	0.000882503
1633	108	193	A	20	76	154	68	5.28	3.52	1	ralt	TRUE	0.637485	4	0.105429	FALSE	3.00246	-9.46127	-1.71166	FALSE	FALSE	0	0.0744006	3.74854	4.7338	0.000877921
1634	108	194	O	40	0	168	107	4.05	5.14	1	ralt	TRUE	1.03856	4	0.220571	FALSE	4.62335	7.47542	-8.00111	FALSE	FALSE	20	0.0787531	3.66652	4.72903	0.000294723
1635	108	195	A	20	138	154	91	3.81	3.81	0	lalt	TRUE	0.375653	4	0.347429	FALSE	6.99145	-6.46677	5.86355	FALSE	FALSE	4	0.0115985	6.42992	4.73533	0.00115288
1636	108	196	R	80	0	168	107	5.27	3.76	0	lalt	TRUE	0.847836	4	0.126571	FALSE	-2.38212	0.691168	-8.89562	FALSE	FALSE	26	0.0098406	6.66704	4.74244	0.00217288
1637	108	197	O	40	0	168	107	4.96	5.31	1	ralt	TRUE	1.17889	4	0.115429	FALSE	9.88627	8.49207	-7.10968	FALSE	FALSE	20	0.0820309	3.60769	4.73745	0.00129303
1638	108	198	I	20	75	124	89	4.4	4.77	1	ralt	TRUE	0.354905	4	0.228571	FALSE	2.541	1.30635	4.82732	FALSE	FALSE	17	0.075633	3.72484	4.73298	0.000275586
1639	108	199	T	80	157	193	131	5.49	3.63	1	ralt	TRUE	0.77697	4	0.156571	FALSE	7.09549	14.4015	-3.82791	FALSE	FALSE	31	0.0885588	3.49722	4.72762	0.000262013
1640	108	200	R	80	138	154	91	4.79	4.7	1	ralt	TRUE	0.515011	4	0.313714	FALSE	-4.28664	3.43578	-7.6077	FALSE	FALSE	28	0.0924209	3.43564	4.72204	0.000229762
1641	108	201	T	80	0	168	107	3.73	4.48	0	lalt	TRUE	0.361126	4	0.102571	FALSE	1.08973	12.9786	-7.09704	FALSE	FALSE	32	0.0143301	6.12481	4.72713	0.000901477
1642	108	202	O	40	3	121	112	3.72	4.25	0	lalt	TRUE	0.798292	4	0.214	FALSE	15.9179	1.38654	-8.68304	FALSE	FALSE	21	0.0149834	6.0605	4.73195	0.00153838
1643	108	203	R	80	0	168	107	4.48	5.29	0	lalt	TRUE	0.80146	4	0.112	FALSE	-1.05607	-11.8405	3.35133	FALSE	FALSE	26	0.0137365	6.18584	4.73718	0.00155772
1644	108	204	A	20	157	193	131	3.84	4.91	0	lalt	TRUE	0.672482	4	0.227143	FALSE	17.3261	15.1969	-7.85195	FALSE	FALSE	1	0.0123428	6.34019	4.74293	0.00169387
1645	108	205	A	20	76	154	68	4.43	3.61	1	ralt	TRUE	0.655591	4	0.113714	FALSE	11.987	2.80641	-10.9496	FALSE	FALSE	0	0.0748454	3.73994	4.73864	0.0010217
1646	108	206	O	40	0	168	107	4.6	4.23	1	ralt	TRUE	0.641747	4	0.215429	FALSE	4.40682	-19.1157	5.50703	FALSE	FALSE	20	0.0831124	3.58879	4.73377	0.000257681
1647	108	207	A	20	76	154	68	4.24	5.14	1	ralt	TRUE	0.57683	4	0.133714	FALSE	0.426377	0.0997396	-1.79242	FALSE	FALSE	0	0.0783446	3.67402	4.72929	0.000248516
1648	108	208	D	40	0	168	107	4.91	4.95	0	lalt	TRUE	0.373926	4	0.154571	FALSE	4.60071	5.02961	-5.59727	FALSE	FALSE	8	0.0105165	6.57119	4.7358	0.00112567
1649	108	209	I	20	75	124	89	3.56	5.25	1	ralt	TRUE	1.22283	4	0.221714	FALSE	2.44195	4.29231	-14.2615	FALSE	FALSE	17	0.0763188	3.71182	4.73149	0.00112399
1650	108	210	T	80	75	124	89	4.86	4.32	0	lalt	TRUE	0.456039	4	0.187714	FALSE	1.40681	-4.26092	6.31489	FALSE	FALSE	35	0.0131155	6.25258	4.73684	0.000929827
1651	108	211	D	40	3	121	112	3.92	5.48	1	ralt	TRUE	0.322145	4	0	FALSE	-0.00773675	-22.712	3.23826	FALSE	FALSE	9	0.0726453	3.78299	4.73285	0.000932584
1652	108	212	I	20	75	124	89	5.05	5.24	1	lalt	FALSE	0.948176	4	0.349714	FALSE	-7.69505	-3.38209	11.8636	FALSE	FALSE	17	0.0794279	3.65421	4.72838	0.000256385
1653	108	213	D	40	0	168	107	4.65	5.14	0	lalt	TRUE	0.416196	4	0.0965714	FALSE	15.8345	19.9375	-11.4522	FALSE	FALSE	8	0.0143214	6.12568	4.73324	0.000840245
1654	108	214	T	80	157	193	131	4.76	4.93	1	ralt	TRUE	0.696191	4	0	FALSE	11.5843	5.62771	-5.86196	FALSE	FALSE	31	0.0872453	3.51878	4.72828	0.000823387
1655	108	215	R	80	75	124	89	5.49	5.16	0	lalt	TRUE	0.386271	4	0.212286	FALSE	-5.52733	3.63996	3.96206	FALSE	FALSE	29	0.0135308	6.20761	4.73339	0.000854097
1656	108	216	I	20	75	124	89	4.2	4.11	1	ralt	TRUE	0.480239	4	0.114286	FALSE	5.20936	7.43867	5.7881	FALSE	FALSE	17	0.0821354	3.60585	4.72881	0.000857719
1657	108	217	I	20	0	168	107	4.08	4.41	0	lalt	TRUE	0.343376	4	0.219143	FALSE	8.38153	7.90118	-4.4064	FALSE	FALSE	14	0.0143187	6.12595	4.7336	0.000810462
1658	108	218	O	40	0	168	107	4.97	3.74	1	ralt	TRUE	1.00051	4	0.115714	FALSE	8.18252	13.1056	-10.991	FALSE	FALSE	20	0.0831229	3.58861	4.72899	0.000804856
1659	108	219	D	40	3	121	112	5.03	4.5	1	ralt	TRUE	0.51964	4	0.115714	FALSE	-0.226796	6.3965	-8.53272	FALSE	FALSE	9	0.0742878	3.75073	4.72504	0.000233339
1660	108	220	D	40	3	121	112	4.29	3.93	1	ralt	TRUE	0.55568	4	0.0985714	FALSE	9.6615	3.7022	-10.6032	FALSE	FALSE	9	0.0779039	3.68216	4.72085	0.000528936
1661	108	221	R	80	138	154	91	3.88	4.51	1	ralt	TRUE	0.474857	4	0	FALSE	1.41802	-9.85844	6.65608	FALSE	FALSE	28	0.08876	3.49395	4.71599	0.000215148
1662	108	222	D	40	3	121	112	4.99	3.75	1	ralt	TRUE	0.374018	4	0	FALSE	4.53277	17.7793	-8.37625	FALSE	FALSE	9	0.081176	3.6228	4.71164	0.000208028
1663	108	223	T	80	157	193	131	4.32	4.86	1	ralt	TRUE	1.02009	4	0.227714	FALSE	1.15989	0.29114	13.5135	FALSE	FALSE	31	0.0880746	3.50513	4.7069	0.000207394
1664	108	224	A	20	76	154	68	4.21	3.98	1	ralt	TRUE	0.359188	4	0.115429	FALSE	-8.18243	0.475022	-5.02285	FALSE	FALSE	0	0.0770682	3.69772	4.7029	0.000212541
1665	108	225	T	80	157	193	131	5.07	3.64	1	ralt	TRUE	0.291347	4	0.00742857	FALSE	13.5503	29.3229	-14.227	FALSE	FALSE	31	0.0912311	3.45433	4.69803	0.000206964
1666	108	226	O	40	157	193	131	4.54	4.23	0	lalt	TRUE	1.03044	4	0	FALSE	15.9251	13.8006	-8.51559	FALSE	FALSE	19	0.0131787	6.24564	4.7032	0.000798831
1667	108	227	R	80	138	154	91	4.99	3.66	1	ralt	TRUE	0.728542	4	0	FALSE	8.18444	9.03469	-6.09312	FALSE	FALSE	28	0.0905373	3.46534	4.69841	0.000795965
1668	108	228	A	20	76	154	68	3.91	3.64	1	ralt	TRUE	0.320678	4	0.181143	FALSE	-6.65372	5.51477	4.72646	FALSE	FALSE	0	0.0796884	3.64949	4.69434	0.000198842
1669	108	229	A	20	0	168	107	4.38	3.98	0	lalt	TRUE	0.441846	4	0	FALSE	2.66824	-6.79866	-3.80842	FALSE	FALSE	2	0.0147383	6.08428	4.69893	0.000727587
1670	108	230	A	20	138	154	91	5.07	4.21	0	lalt	TRUE	1.33199	4	0.115714	FALSE	-6.04601	-9.92204	6.60247	FALSE	FALSE	4	0.0138317	6.17587	4.7038	0.00127415
1671	108	231	T	80	138	154	91	4.17	4.47	0	lalt	TRUE	0.401099	4	0.112857	FALSE	3.03954	-1.45816	0.260777	FALSE	FALSE	34	0.012084	6.37076	4.70927	0.00139201
1672	108	232	R	80	76	154	68	3.71	5.06	0	lalt	TRUE	0.7312	4	0.11	FALSE	6.17368	6.70874	-0.890756	FALSE	FALSE	24	0.0118277	6.40169	4.7148	0.00148529
1673	108	233	I	20	138	154	91	4.11	4.7	0	lalt	TRUE	1.54225	4	0.122	FALSE	10.1744	5.82957	1.48871	FALSE	FALSE	16	0.0101704	6.61947	4.72099	0.00160168
1674	108	234	I	20	138	154	91	3.92	5.39	0	lalt	TRUE	0.726335	4	0.245429	FALSE	9.46344	1.10944	-11.6621	FALSE	FALSE	16	0.0138365	6.17538	4.72571	0.0031475
1675	108	235	T	80	3	121	112	3.59	5.18	0	lalt	TRUE	0.471415	4	0	FALSE	-4.47197	-2.7209	-12.0337	FALSE	FALSE	33	0.0116967	6.41775	4.73118	0.00137504
1676	108	236	D	40	3	121	112	5.21	4.52	1	ralt	TRUE	0.316554	4	0.121143	FALSE	16.4748	21.6573	-7.11792	FALSE	FALSE	9	0.0806743	3.63175	4.72704	0.000837304
1677	108	237	I	20	157	193	131	4.73	3.61	0	lalt	TRUE	1.10049	4	0.295143	FALSE	4.84362	4.41307	-6.93342	FALSE	FALSE	13	0.0149285	6.06579	4.73134	0.000678374
1678	108	238	O	40	0	168	107	4.27	4.99	1	lalt	FALSE	0.950678	4	0.218857	FALSE	-4.5985	-7.12476	3.94474	FALSE	FALSE	20	0.0807051	3.6312	4.72723	0.000675156
1679	108	239	A	20	157	193	131	5.25	3.6	0	lalt	TRUE	0.91072	4	0.138	FALSE	11.9307	-3.02554	9.03706	FALSE	FALSE	1	0.0144082	6.11696	4.73167	0.000688606
1680	109	0	R	80	76	154	68	4.09	3.81	0	lalt	FALSE	1.21377	1	0.31	FALSE	9.54942	-0.730932	9.65574	FALSE	FALSE	24	0.00628931	7.31288	4.53758	0.0412627
1681	109	1	D	40	157	193	131	5.24	4.86	0	ralt	TRUE	1.38791	1	0.364286	FALSE	8.66318	6.80777	-11.8849	FALSE	FALSE	7	0.0137685	6.18249	4.5571	0.0629084
1682	109	2	T	20	75	124	89	4.41	4.03	1	lalt	TRUE	0.881965	1	0.349429	FALSE	6.29422	9.77591	-6.25956	FALSE	FALSE	35	0.0506455	4.30342	4.5428	0.0299711
1683	109	3	O	40	75	124	89	4.53	5.5	0	ralt	TRUE	1.34002	1	0.488	TRUE	13.7987	-0.110064	-3.85544	FALSE	FALSE	23	0.00870827	6.8434	4.57053	0.0364432
1684	109	4	R	80	138	154	91	4.73	4.03	1	ralt	FALSE	1.218	1	0.197714	FALSE	-3.57625	-14.3758	19.4615	FALSE	FALSE	28	0.121698	3.03862	4.53021	0.0311155
1685	109	5	T	20	75	124	89	5.07	3.6	1	lalt	TRUE	1.60504	1	0.686	TRUE	3.11533	14.6485	1.3971	FALSE	FALSE	35	0.07133	3.80935	4.50817	0.00691778
1686	109	6	T	20	76	154	68	4.08	3.75	0	ralt	TRUE	1.6491	1	0.717429	TRUE	7.25721	8.16652	0.782765	FALSE	FALSE	30	0.0202156	5.62838	4.51988	0.018298
1687	109	7	R	80	138	154	91	4.55	4.73	1	ralt	FALSE	1.38124	1	0.534286	TRUE	0.0564843	2.58909	-6.30618	FALSE	FALSE	28	0.136463	2.87341	4.48019	0.0155087
1688	109	8	I	80	138	154	91	4.53	4.21	0	ralt	TRUE	1.00531	1	0.359714	FALSE	-3.8378	-6.86937	5.01641	FALSE	FALSE	16	0.00128645	9.60239	4.5273	0.0682022
1689	109	9	T	20	75	124	89	4.77	4.66	1	lalt	TRUE	0.366387	1	0.877714	TRUE	-5.60258	-9.86715	0.936729	FALSE	FALSE	35	0.0872117	3.51933	4.50204	0.0679134
1690	109	10	T	20	76	154	68	5.42	3.89	0	lalt	FALSE	1.13348	1	0.315143	FALSE	-3.20221	-1.34725	3.54157	FALSE	FALSE	30	0.0401969	4.63677	4.49813	0.00938252
1691	109	11	O	40	0	168	107	3.65	4.4	1	ralt	FALSE	0.626573	1	0.511429	TRUE	-3.77875	3.1408	4.40067	FALSE	FALSE	20	0.0602168	4.05369	4.48441	0.0104512
1692	109	12	R	80	138	154	91	4.27	3.58	1	ralt	FALSE	1.41468	1	0.382857	FALSE	15.1717	11.4814	5.2845	FALSE	FALSE	28	0.143082	2.80509	4.44839	0.00548949
1693	109	13	D	40	3	121	112	5.48	3.69	1	ralt	FALSE	0.706872	1	0.178	FALSE	4.34524	14.8399	-9.72822	FALSE	FALSE	9	0.0623797	4.00278	4.4355	0.00509542
1694	109	14	T	20	75	124	89	4.91	4.69	1	lalt	TRUE	0.895967	1	0.446	TRUE	-3.05025	-5.61462	-4.2043	FALSE	FALSE	35	0.0984906	3.34387	4.41168	0.00574811
1695	109	15	O	40	0	168	107	5.25	4.35	1	ralt	FALSE	1.15397	1	0.496	TRUE	-4.77545	11.1999	14.914	FALSE	FALSE	20	0.0751017	3.73501	4.39559	0.00489051
1696	109	16	A	20	76	154	68	5.49	5.5	1	ralt	FALSE	0.870014	1	0.777429	TRUE	8.42298	4.06614	-4.45732	FALSE	FALSE	0	0.032656	4.93651	4.39927	0.00901205
1697	109	17	O	40	0	168	107	4.65	4.81	1	missing	FALSE		1	0.744	TRUE	5.8162	15.1729	-5.57307	TRUE	TRUE	20	0.0911356	3.45584	4.37946	0.00823869
1698	109	18	A	20	75	124	89	4.61	5.38	0	ralt	TRUE	1.03187	1	1	TRUE	2.53264	7.57989	-8.68206	FALSE	FALSE	5	0.0115304	6.43841	4.4026	0.0161055
1699	109	19	A	20	76	154	68	4.42	4.96	1	lalt	TRUE	1.01886	1	0.526286	TRUE	7.53874	2.01604	-2.06196	FALSE	FALSE	0	0.0490566	4.34941	4.39761	0.0176098
1700	109	20	I	80	157	193	131	4.93	4.39	1	lalt	TRUE	1.28792	1	0.692286	TRUE	2.50833	17.5802	-3.96742	FALSE	FALSE	13	0.0859164	3.54092	4.38034	0.00575462
1701	109	21	D	40	75	124	89	4.76	4.09	0	ralt	TRUE	1.62191	1	0.532286	TRUE	3.35601	-0.274702	-0.902594	FALSE	FALSE	11	0.0129096	6.27541	4.40105	0.0137266
1702	109	22	T	20	138	154	91	5.44	4.93	0	lalt	FALSE	1.10699	1	0.544857	TRUE	3.65184	14.1128	5.57975	FALSE	FALSE	34	0.0146389	6.09405	4.41921	0.0218653
1703	109	23	A	20	3	121	112	4.11	4.98	0	missing	FALSE		1	0.22	FALSE	8.60766	6.67663	-5.92868	TRUE	TRUE	3	0.0182283	5.77767	4.43329	0.0185029
1704	109	24	A	20	138	154	91	5.26	5	0	ralt	TRUE	0.434964	1	0.314	FALSE	9.67013	17.3562	-4.24157	FALSE	FALSE	4	0.0141509	6.14296	4.45113	0.0182131
1705	109	25	D	40	75	124	89	4.2	4.38	0	ralt	TRUE	1.45391	1	0.557429	TRUE	9.51518	5.75936	-6.27732	FALSE	FALSE	11	0.0284565	5.1351	4.45666	0.0151442
1706	109	26	D	40	75	124	89	5.29	5.1	0	ralt	TRUE	0.903025	1	0.628	TRUE	13.8053	9.7048	-0.475878	FALSE	FALSE	11	0.0441266	4.50221	4.45381	0.0190301
1707	109	27	A	20	3	121	112	3.56	4.59	0	ralt	TRUE	1.10203	1	0.65	TRUE	1.75056	-7.42459	3.84143	FALSE	FALSE	3	0.032944	4.92384	4.45661	0.00769621
1708	109	28	O	40	76	154	68	5.25	4.83	0	ralt	TRUE	1.53814	1	0.583429	TRUE	4.03609	11.4925	-12.6941	FALSE	FALSE	18	0.0123821	6.3356	4.47542	0.0142291
1709	109	29	R	80	0	168	107	4.78	4.23	0	lalt	FALSE	0.807081	1	0.475714	TRUE	5.55369	-3.4314	-5.24128	FALSE	FALSE	26	0.00522496	7.58036	4.5043	0.027771
1710	109	30	R	80	3	121	112	3.5	4.54	0	lalt	FALSE	1.51013	1	0.779143	TRUE	3.56962	4.04632	6.94844	FALSE	FALSE	27	0.0025729	8.60239	4.53855	0.0444769
1711	109	31	T	20	138	154	91	5.02	4.16	0	ralt	TRUE	0.67825	1	0.692286	TRUE	3.05781	5.93278	-0.453946	FALSE	FALSE	34	0.0275979	5.1793	4.54322	0.0309609
1712	109	32	I	80	157	193	131	4.36	3.95	1	lalt	TRUE	0.774396	1	0.241429	FALSE	6.83924	-0.66573	-0.47621	FALSE	FALSE	13	0.0854606	3.5486	4.52725	0.00592997
1713	109	33	O	40	0	168	107	5.01	4.83	1	lalt	TRUE	0.974534	1	0.351429	FALSE	8.33153	5.51426	-8.81288	FALSE	FALSE	20	0.0844955	3.56498	4.51198	0.0027535
1714	109	34	D	40	3	121	112	4.2	4.17	1	ralt	FALSE	0.623502	1	0.537143	TRUE	4.66777	14.1285	-8.01065	FALSE	FALSE	9	0.0579515	4.10901	4.50413	0.00338824
1715	109	35	T	20	75	124	89	3.56	4.41	1	lalt	TRUE	1.00171	1	0.867143	TRUE	2.03678	4.65539	-10.9891	FALSE	FALSE	35	0.0834441	3.58305	4.48987	0.00332471
1716	109	36	R	80	0	168	107	3.54	3.73	0	lalt	FALSE	0.745888	1	0.830571	TRUE	7.56197	19.7057	-14.4987	FALSE	FALSE	26	0.0186059	5.7481	4.50122	0.00704905
1717	109	37	T	20	75	124	89	3.54	4.62	1	lalt	TRUE	0.787123	1	0.941429	TRUE	-1.7682	0.0536479	12.3469	FALSE	FALSE	35	0.0948566	3.39811	4.48511	0.00674588
1718	109	38	D	40	138	154	91	5.36	4.93	0	ralt	TRUE	0.688292	1	0.932	TRUE	2.25283	5.30729	0.170492	FALSE	FALSE	10	0.00688424	7.18249	4.5089	0.0131063
1719	109	39	T	20	75	124	89	5.06	4.16	1	ralt	FALSE	0.376329	1	0.105429	FALSE	4.04372	1.05339	9.00222	FALSE	FALSE	35	0.10566	3.24249	4.49121	0.0127819
1720	109	40	D	40	3	121	112	4.19	5.38	1	lalt	TRUE	0.910329	1	1	TRUE	-0.403175	2.01644	-11.6088	FALSE	FALSE	9	0.0665343	3.90976	4.48204	0.00238145
1721	109	41	R	80	138	154	91	4.42	3.55	1	missing	FALSE		1	0.216	FALSE	3.33679	-1.97668	-0.402495	TRUE	TRUE	28	0.102181	3.2908	4.46576	0.00236504
1722	109	42	T	20	138	154	91	4.83	4.85	0	ralt	TRUE	0.857475	1	0.593429	TRUE	4.03918	4.2342	-11.3967	FALSE	FALSE	34	0.0365264	4.77492	4.4669	0.00352848
1723	109	43	D	40	0	168	107	4.01	3.84	0	lalt	FALSE	0.746452	1	0.590857	TRUE	-2.1124	-1.53201	4.56062	FALSE	FALSE	8	0.00716503	7.12481	4.48954	0.013096
1724	109	44	D	40	3	121	112	4.19	4.91	1	ralt	FALSE	0.777705	1	0.557143	TRUE	15.0048	10.4783	-9.83423	FALSE	FALSE	9	0.0757075	3.72342	4.47879	0.0115222
1725	109	45	O	40	75	124	89	4.77	4.16	0	lalt	FALSE	0.836786	1	0.793429	TRUE	0.517428	-3.27239	2.75673	FALSE	FALSE	23	0.0165386	5.91802	4.49109	0.00630099
1726	109	46	A	20	0	168	107	3.85	4.11	0	ralt	TRUE	0.504912	1	0.547429	TRUE	10.2137	10.9287	-9.09073	FALSE	FALSE	2	0.0131155	6.25258	4.50609	0.0112037
1727	109	47	T	20	0	168	107	5.48	4.88	0	ralt	TRUE	0.89408	1	0.404857	TRUE	2.87194	10.623	-12.0837	FALSE	FALSE	32	0.0102296	6.61111	4.52371	0.0133863
1728	109	48	R	80	75	124	89	4.12	4.88	0	lalt	FALSE	1.06496	1	0.668	TRUE	12.6092	23.4915	5.91951	FALSE	FALSE	29	0.00269542	8.53527	4.55281	0.0252426
1729	109	49	T	20	75	124	89	3.84	5.08	1	lalt	TRUE	0.553164	1	0.389429	FALSE	8.13955	4.10029	-5.50983	FALSE	FALSE	35	0.104994	3.25162	4.53687	0.0184937
1730	109	50	A	20	157	193	131	4.18	3.87	0	lalt	FALSE	1.06922	1	0.447143	TRUE	6.33473	10.8351	-11.9829	FALSE	FALSE	1	0.0078982	6.98426	4.55648	0.0091306
1731	109	51	R	80	75	124	89	3.61	3.55	0	lalt	FALSE	0.670425	1	0.732571	TRUE	3.45412	12.3704	-0.163207	FALSE	FALSE	29	0.0140967	6.1485	4.56929	0.0135161
1732	109	52	D	40	157	193	131	4.69	5.38	0	ralt	TRUE	0.779653	1	0.621143	TRUE	9.42212	-1.54512	-0.553082	FALSE	FALSE	7	0.0171527	5.86542	4.57948	0.0094082
1733	109	53	I	80	0	168	107	4.57	3.54	0	ralt	TRUE	0.80064	1	0.342857	FALSE	-0.560654	-2.65596	6.73213	FALSE	FALSE	14	0.00572398	7.44877	4.6012	0.014308
1734	109	54	I	80	75	124	89	3.58	4.35	0	lalt	FALSE	1.2908	1	0.999714	TRUE	1.86901	5.03687	-12.6673	FALSE	FALSE	17	0.00188679	9.04985	4.63023	0.0297236
1735	109	55	T	20	0	168	107	3.72	3.86	0	lalt	FALSE	1.18394	1	0.693429	TRUE	-1.28285	-19.2589	26.2546	FALSE	FALSE	32	0.0203193	5.62101	4.63745	0.0230087
1736	109	56	R	80	138	154	91	4.54	5.31	1	ralt	FALSE	0.425164	1	0.388571	FALSE	-8.16639	-1.84826	2.12553	FALSE	FALSE	28	0.0963905	3.37497	4.62312	0.0040991
1737	109	57	D	40	3	121	112	4.64	4.82	1	lalt	TRUE	0.960201	1	0.522857	TRUE	1.32961	-15.6121	-0.869077	FALSE	FALSE	9	0.0758775	3.72018	4.61256	0.00154276
1738	109	58	A	20	76	154	68	3.67	4.43	1	lalt	TRUE	1.06623	1	0.463429	TRUE	6.50623	3.17661	-5.35825	FALSE	FALSE	0	0.0393416	4.6678	4.61133	0.00259401
1739	109	59	O	40	76	154	68	4.33	4.51	0	ralt	TRUE	1.57834	1	0.409143	TRUE	-1.83491	-3.6613	-14.1003	FALSE	FALSE	18	0.0188679	5.72792	4.61946	0.00512914
1740	109	60	D	40	76	154	68	4.84	5.19	0	lalt	FALSE	1.00005	2	0.606571	TRUE	-4.00594	-11.3089	14.2023	FALSE	FALSE	6	0.00648585	7.26849	4.63861	0.0114719
1741	109	61	D	40	3	121	112	3.59	4.12	1	ralt	FALSE	0.609108	2	0.200286	FALSE	1.95225	2.12308	6.64181	FALSE	FALSE	9	0.0830578	3.58974	4.6271	0.00873245
1742	109	62	O	40	0	168	107	4.48	5.18	1	lalt	TRUE	0.602344	2	0.436571	TRUE	5.32712	0.772567	-13.5809	FALSE	FALSE	20	0.0696958	3.84278	4.61823	0.00158894
1743	109	63	I	80	157	193	131	4.86	3.54	1	ralt	FALSE	0.706395	2	0.444	TRUE	2.5809	-5.07338	3.4276	FALSE	FALSE	13	0.0688012	3.86142	4.60973	0.00172631
1744	109	64	T	20	157	193	131	4.62	4.22	0	lalt	FALSE	0.553567	2	0.442857	TRUE	7.93421	3.376	-20.7291	FALSE	FALSE	31	0.0045283	7.78681	4.63135	0.0106221
1745	109	65	D	40	3	121	112	3.51	4.25	1	ralt	FALSE	0.840666	2	0.825429	TRUE	2.59645	-6.94567	1.7068	FALSE	FALSE	9	0.0896693	3.47924	4.61937	0.0102835
1746	109	66	D	40	3	121	112	5.44	5.14	1	lalt	TRUE	0.931854	2	0.452286	TRUE	-13.2393	-20.7982	18.5985	FALSE	FALSE	9	0.0985942	3.34235	4.60636	0.00261215
1747	109	67	D	40	3	121	112	4	3.97	1	lalt	TRUE	1.00979	2	0.708286	TRUE	10.0547	7.56755	-9.33414	FALSE	FALSE	9	0.107346	3.21966	4.59249	0.00232194
1748	109	68	O	40	76	154	68	3.64	3.88	0	ralt	TRUE	0.729969	2	0.844	TRUE	-9.22483	-9.60457	12.2275	FALSE	FALSE	18	0.0268505	5.21891	4.59631	0.00254829
1749	109	69	R	80	138	154	91	4.03	5.36	1	ralt	FALSE	0.379214	2	0.727714	TRUE	-1.79564	14.3894	5.71908	FALSE	FALSE	28	0.0939802	3.4115	4.58453	0.00259648
1750	109	70	I	80	157	193	131	5.22	4.57	1	ralt	FALSE	0.459297	2	0.515429	TRUE	-2.10515	1.10451	-6.33344	FALSE	FALSE	13	0.0736917	3.76235	4.57608	0.00123441
1751	109	71	T	20	75	124	89	4.71	5.48	1	lalt	TRUE	0.61235	2	0.742	TRUE	-6.66824	-8.98401	-6.01861	FALSE	FALSE	35	0.0927526	3.43047	4.56488	0.00122173
1752	109	72	T	20	75	124	89	4.93	4.57	1	lalt	TRUE	0.566362	2	0.694857	TRUE	0.800164	0.0179616	-0.867239	FALSE	FALSE	35	0.101153	3.30539	4.5528	0.00225836
1753	109	73	O	40	0	168	107	5.38	5.14	1	ralt	FALSE	0.721432	2	0.678571	TRUE	1.30395	-1.52076	-0.593475	FALSE	FALSE	20	0.0718366	3.79914	4.54521	0.00114531
1754	109	74	A	20	76	154	68	3.96	5.26	1	lalt	TRUE	1.22636	2	0.43	TRUE	3.0303	3.42413	-8.96395	FALSE	FALSE	0	0.0427101	4.54928	4.54401	0.00185405
1755	109	75	I	80	0	168	107	4	3.56	0	lalt	FALSE	1.01843	2	0.290857	FALSE	2.00435	12.1051	-4.06533	FALSE	FALSE	14	0.0135985	6.20041	4.55531	0.0046001
1756	109	76	T	20	75	124	89	3.65	4.73	1	lalt	TRUE	0.628632	2	0.516571	TRUE	0.907067	-7.98032	-0.697506	FALSE	FALSE	35	0.106469	3.23149	4.54313	0.00381096
1757	109	77	T	20	3	121	112	4.09	4.13	0	ralt	TRUE	0.527798	2	0.465429	TRUE	-11.655	-16.9243	10.5471	FALSE	FALSE	33	0.00951745	6.71521	4.55762	0.00490426
1758	109	78	R	80	138	154	91	4.35	4.94	1	lalt	TRUE	0.943942	2	0.350286	FALSE	4.39996	-0.0327463	-0.720612	FALSE	FALSE	28	0.0953327	3.39089	4.54697	0.0049119
1759	109	79	I	80	157	193	131	5.47	3.54	1	lalt	TRUE	0.772025	2	0.530286	TRUE	8.23908	3.75173	-3.21432	FALSE	FALSE	13	0.0766202	3.70613	4.5391	0.00101894
1760	109	80	I	80	3	121	112	4.96	3.63	0	lalt	FALSE	0.85212	2	0.438	TRUE	-11.9144	-22.1572	14.7342	FALSE	FALSE	15	0.00146389	9.41598	4.56532	0.0159689
1761	109	81	D	40	75	124	89	4.06	3.8	0	lalt	FALSE	0.660237	2	0.767429	TRUE	-8.79569	-9.08377	3.7119	FALSE	FALSE	11	0.0319303	4.96893	4.56729	0.0166737
1762	109	82	I	80	75	124	89	5.4	4.23	0	lalt	FALSE	0.746446	2	0.583429	TRUE	-4.42932	-8.5139	3.38022	FALSE	FALSE	17	0.00991365	6.65637	4.58077	0.00541658
1763	109	83	T	20	3	121	112	5.47	3.52	0	lalt	FALSE	0.554502	2	0.606571	TRUE	0.817619	-0.00298365	7.81166	FALSE	FALSE	33	0.0174409	5.84138	4.58881	0.00640966
1764	109	84	O	40	157	193	131	4.33	5.23	0	lalt	FALSE	1.18657	2	0.410286	TRUE	3.32904	-5.02059	0.102718	FALSE	FALSE	19	0.00377359	8.04985	4.60919	0.0105688
1765	109	85	O	40	3	121	112	4.07	4.61	0	lalt	FALSE	0.955587	2	0.399143	FALSE	3.48134	-4.13028	-3.66885	FALSE	FALSE	21	0.0074848	7.06182	4.6244	0.0129455
1766	109	86	A	20	3	121	112	4.56	5.44	0	ralt	TRUE	0.769724	2	0.469143	TRUE	-0.435894	-5.71698	-1.39647	FALSE	FALSE	3	0.0252088	5.30993	4.62829	0.00643442
1767	109	87	O	40	0	168	107	5.05	4.38	1	ralt	FALSE	0.796724	2	0.538	TRUE	12.5164	0.0455649	-5.9167	FALSE	FALSE	20	0.0717902	3.80007	4.62103	0.00216003
1768	109	88	A	20	76	154	68	4.47	4.03	1	lalt	TRUE	0.966725	2	0.439143	TRUE	-8.872	-22.9828	23.6611	FALSE	FALSE	0	0.0459525	4.44371	4.6187	0.00140172
1769	109	89	A	20	0	168	107	4.19	4.62	0	lalt	FALSE	0.602919	2	0.629714	TRUE	-2.97078	2.213	-1.53324	FALSE	FALSE	2	0.0166038	5.91235	4.62661	0.00316557
1770	109	90	D	40	76	154	68	3.58	4.5	0	ralt	TRUE	0.62104	2	0.598571	TRUE	-2.44559	-15.5077	4.69888	FALSE	FALSE	6	0.0128781	6.27894	4.63672	0.00514343
1771	109	91	D	40	0	168	107	3.55	3.53	0	ralt	TRUE	2.07611	2	0.461714	TRUE	3.92295	-12.8592	-6.71662	FALSE	FALSE	8	0.012331	6.34157	4.64707	0.00575451
1772	109	92	I	80	157	193	131	5.01	5.19	1	lalt	TRUE	0.700349	2	0.469429	TRUE	9.09135	12.2094	0.676512	FALSE	FALSE	13	0.0766509	3.70555	4.63927	0.00336398
1773	109	93	A	20	75	124	89	5.16	3.75	0	lalt	FALSE	1.00233	2	0.390857	FALSE	5.54922	25.0639	-6.10206	FALSE	FALSE	5	0.0125786	6.31288	4.64931	0.00325127
1774	109	94	I	80	157	193	131	3.78	4.26	1	ralt	FALSE	0.616445	2	0.372571	FALSE	14.8054	2.37337	-1.55103	FALSE	FALSE	13	0.083164	3.5879	4.64075	0.003179
1775	109	95	R	80	3	121	112	4.08	3.98	0	ralt	TRUE	1.15258	2	0.350286	FALSE	8.78273	12.3113	-6.19908	FALSE	FALSE	27	0.00892986	6.80715	4.65349	0.00404482
1776	109	96	O	40	157	193	131	4.86	3.68	0	lalt	FALSE	0.974714	2	0.338	FALSE	3.67742	16.7635	-4.45539	FALSE	FALSE	19	0.0110063	6.50553	4.66436	0.00661614
1777	109	97	I	80	138	154	91	4	4.27	0	ralt	TRUE	0.873854	2	0.315714	FALSE	17.5083	10.0482	5.08715	FALSE	FALSE	16	0.00794439	6.97585	4.67767	0.00688223
1778	109	98	T	20	157	193	131	4.64	4.58	0	ralt	TRUE	1.15096	2	0.419143	TRUE	-15.506	-23.8182	13.1964	FALSE	FALSE	31	0.010842	6.52722	4.68837	0.00683245
1779	109	99	R	80	138	154	91	4.36	4.89	1	ralt	FALSE	0.85005	2	0.554286	TRUE	-5.38114	5.18746	1.92315	FALSE	FALSE	28	0.0879106	3.50782	4.6793	0.00329657
1780	109	100	D	40	0	168	107	4.21	3.59	0	lalt	FALSE	0.997101	2	0.454	TRUE	1.70223	-4.18916	-2.11464	FALSE	FALSE	8	0.0188679	5.72792	4.68516	0.00210409
1781	109	101	R	80	138	154	91	3.58	4.12	1	lalt	TRUE	0.468318	2	0.45	TRUE	1.80029	-6.30084	4.01077	FALSE	FALSE	28	0.0939265	3.41232	4.67558	0.00205749
1782	109	102	A	20	76	154	68	4.05	5.06	1	ralt	FALSE	0.856522	2	0.533143	TRUE	5.17393	1.27842	3.97123	FALSE	FALSE	0	0.0485371	4.36477	4.67264	0.000981311
1783	109	103	O	40	76	154	68	4.38	4.68	0	lalt	FALSE	0.564604	2	0.124286	FALSE	1.84897	3.71028	3.59352	FALSE	FALSE	18	0.0272838	5.19581	4.67516	0.00183778
1784	109	104	T	20	3	121	112	4.18	5.07	0	lalt	FALSE	0.914691	2	0.587714	TRUE	13.071	14.3253	-19.7443	FALSE	FALSE	33	0.0219677	5.50848	4.6796	0.00260519
1785	109	105	A	20	76	154	68	4.12	3.91	1	lalt	TRUE	0.897743	2	0.596	TRUE	8.55977	1.56968	13.1235	FALSE	FALSE	0	0.0545965	4.19505	4.67559	0.00198574
1786	109	106	I	80	157	193	131	5.41	4.28	1	ralt	FALSE	1.07689	2	0.684	TRUE	-1.88738	-0.394651	1.91123	FALSE	FALSE	13	0.0831783	3.58765	4.66761	0.000901695
1787	109	107	R	80	138	154	91	5.22	4.56	1	lalt	TRUE	0.699948	2	0.732	TRUE	-0.905443	1.35957	2.14246	FALSE	FALSE	28	0.0969785	3.36619	4.65825	0.000625014
1788	109	108	I	80	157	193	131	3.75	4.83	1	ralt	FALSE	0.917972	2	0.405714	TRUE	4.37713	3.03487	-5.09793	FALSE	FALSE	13	0.0889675	3.49058	4.64985	0.000590479
1789	109	109	R	80	138	154	91	4.34	5.18	1	ralt	FALSE	0.749083	2	0.522	TRUE	-2.97289	1.44848	-14.5068	FALSE	FALSE	28	0.102537	3.28578	4.64022	0.000564481
1790	109	110	A	20	157	193	131	5.39	4.11	0	lalt	FALSE	0.920137	2	0.330571	FALSE	3.11874	5.82745	8.01312	FALSE	FALSE	1	0.0115017	6.44201	4.65004	0.00265857
1791	109	111	A	20	76	154	68	5.46	4.81	1	ralt	FALSE	0.493192	2	0.323429	FALSE	1.67391	-0.00383742	1.56299	FALSE	FALSE	0	0.0591708	4.07897	4.64567	0.00286084
1792	109	112	T	20	75	124	89	3.86	4.3	1	lalt	TRUE	0.384131	2	0.379429	FALSE	0.485443	-10.9768	4.00623	FALSE	FALSE	35	0.0873279	3.51741	4.63777	0.000770539
1793	109	113	I	80	157	193	131	3.85	5.09	1	lalt	TRUE	1.17838	2	0.565714	TRUE	-3.31173	-10.4144	1.7603	FALSE	FALSE	13	0.0926934	3.43139	4.62942	0.000573529
1794	109	114	T	20	157	193	131	3.9	4.18	0	ralt	TRUE	0.884437	2	0.538286	TRUE	6.11912	-0.119091	5.06686	FALSE	FALSE	31	0.0163522	5.93437	4.63637	0.00193662
1795	109	115	R	80	138	154	91	5	4.45	1	ralt	FALSE	1.00459	2	0.924571	TRUE	1.22317	7.12392	-16.224	FALSE	FALSE	28	0.105086	3.25036	4.62699	0.0018821
1796	109	116	A	20	75	124	89	4.64	3.81	0	ralt	TRUE	1.23165	2	0.382857	FALSE	8.36685	9.42702	3.41303	FALSE	FALSE	5	0.0172542	5.85691	4.63345	0.00177152
1797	109	117	R	80	157	193	131	5.02	4.8	0	lalt	FALSE	1.17671	2	0.586286	TRUE	4.88817	8.56817	-3.56204	FALSE	FALSE	25	0.00110988	9.81538	4.65535	0.0132533
1798	109	118	I	80	3	121	112	4.62	5.21	0	ralt	TRUE	0.782745	2	0.393714	FALSE	3.77372	-5.3859	-6.7626	FALSE	FALSE	15	0.00759618	7.04051	4.6676	0.0147538
1799	109	119	O	40	3	121	112	4.23	4.48	0	lalt	FALSE	0.704775	2	0.225429	FALSE	9.56682	12.5831	-10.1118	FALSE	FALSE	21	0.0122946	6.34583	4.6763	0.0051167
1800	109	120	T	20	75	124	89	5.44	4.09	1	lalt	TRUE	0.611851	3	0.550857	TRUE	13.2792	-10.3159	6.51557	FALSE	FALSE	35	0.0892598	3.48585	4.66842	0.00227827
1801	109	121	R	80	157	193	131	4.8	4.92	0	lalt	FALSE	0.688919	3	0.410286	TRUE	3.46837	7.63462	-4.55622	FALSE	FALSE	25	0.00745103	7.06834	4.68053	0.00331287
1802	109	122	D	40	138	154	91	5.26	4.35	0	ralt	TRUE	1.15393	3	0.482857	TRUE	-5.69147	-4.46182	-5.23567	FALSE	FALSE	10	0.00955338	6.70977	4.69082	0.00547517
1803	109	123	I	80	3	121	112	4.88	4.14	0	lalt	FALSE	1.6679	3	0.51	TRUE	-2.54947	-5.11429	-9.45547	FALSE	FALSE	15	0.0136466	6.19531	4.69844	0.00418793
1804	109	124	R	80	75	124	89	3.83	3.69	0	ralt	TRUE	0.851983	3	0.348857	FALSE	0.84042	7.15978	2.4961	FALSE	FALSE	29	0.0139151	6.16721	4.70582	0.00345768
1805	109	125	O	40	3	121	112	4.23	3.63	0	lalt	FALSE	0.428227	3	0.470857	TRUE	5.84682	-5.08084	-5.50791	FALSE	FALSE	21	0.0180476	5.79205	4.71117	0.00302473
1806	109	126	O	40	138	154	91	3.52	5.5	0	ralt	TRUE	0.819396	3	0.493143	TRUE	7.02828	21.5263	-13.8268	FALSE	FALSE	22	0.00419287	7.89785	4.72615	0.00586553
1807	109	127	A	20	76	154	68	4.35	4.66	1	lalt	TRUE	0.821487	3	0.475143	TRUE	1.76198	6.20229	4.67091	FALSE	FALSE	0	0.0594976	4.07102	4.72174	0.00490419
1808	109	128	O	40	138	154	91	5.47	4.79	0	ralt	TRUE	0.618591	3	0.524857	TRUE	3.04568	4.42924	3.96427	FALSE	FALSE	22	0.0102393	6.60974	4.73101	0.00253013
1809	109	129	R	80	138	154	91	3.83	4.89	1	ralt	FALSE	0.701606	3	0.922571	TRUE	0.115591	3.36069	-1.40066	FALSE	FALSE	28	0.10223	3.29011	4.7221	0.00233478
1810	109	130	I	80	76	154	68	4.72	5.06	0	ralt	TRUE	0.799709	3	0.510286	TRUE	6.03415	-0.0424468	-7.46214	FALSE	FALSE	12	0.00170493	9.19607	4.74081	0.00826076
1811	109	131	T	20	75	124	89	4.91	5.16	1	lalt	TRUE	0.318767	3	0.619429	TRUE	5.96144	-4.51551	1.45821	FALSE	FALSE	35	0.0893684	3.48409	4.73307	0.00824402
1812	109	132	R	80	138	154	91	4.27	4.52	1	lalt	TRUE	0.472795	3	1	TRUE	1.64719	2.71535	-4.50837	FALSE	FALSE	28	0.106357	3.23302	4.72399	0.000412529
1813	109	133	O	40	0	168	107	5.01	4.69	1	lalt	TRUE	0.765909	3	0.690571	TRUE	7.91054	5.1001	4.86208	FALSE	FALSE	20	0.0581668	4.10366	4.71994	0.000550253
1814	109	134	T	20	0	168	107	4.98	4.81	0	ralt	TRUE	0.32498	3	0.506286	TRUE	-4.94233	4.81846	10.5672	FALSE	FALSE	32	0.0167592	5.89891	4.72553	0.00164842
1815	109	135	T	20	0	168	107	4.86	3.58	0	ralt	TRUE	0.630942	3	0.459714	TRUE	1.72011	13.3129	-2.34633	FALSE	FALSE	32	0.0225091	5.47335	4.7289	0.00475579
1816	109	136	A	20	138	154	91	3.53	3.68	0	ralt	TRUE	0.522174	3	0.620857	TRUE	-0.596429	-2.78788	-7.1693	FALSE	FALSE	4	0.0107503	6.53948	4.73745	0.00283495
1817	109	137	O	40	0	168	107	4.37	4.88	1	ralt	FALSE	0.523425	3	0.671429	TRUE	3.50577	6.68766	-2.27215	FALSE	FALSE	20	0.0626022	3.99764	4.73286	0.00219644
1818	109	138	T	20	157	193	131	5.48	5.01	0	ralt	TRUE	0.710493	3	0.504	TRUE	1.88145	-3.55499	11.454	FALSE	FALSE	31	0.0198439	5.65516	4.73706	0.00136726
1819	109	139	R	80	76	154	68	4.74	5.29	0	lalt	FALSE	1.01244	3	0.622857	TRUE	-4.84094	-18.1412	3.06844	FALSE	FALSE	24	0.00700809	7.15676	4.74814	0.00367816
1820	109	140	O	40	0	168	107	4.96	4.21	1	lalt	TRUE	0.365515	3	0.621714	TRUE	6.14334	4.01672	0.707937	FALSE	FALSE	20	0.067217	3.89503	4.74301	0.00291263
1821	109	141	R	80	138	154	91	5.46	4.77	1	lalt	TRUE	0.715531	3	0.88	TRUE	3.5242	10.2524	-10.1154	FALSE	FALSE	28	0.106598	3.22974	4.73432	0.000452624
1822	109	142	I	80	76	154	68	5.42	5.37	0	ralt	TRUE	0.85559	3	0.683143	TRUE	0.132003	0.209406	8.19126	FALSE	FALSE	12	0.00720797	7.11619	4.74511	0.00266335
1823	109	143	I	80	157	193	131	4.52	5.37	1	lalt	TRUE	1.09951	3	0.836	TRUE	-1.16638	-5.03663	0.473786	FALSE	FALSE	13	0.0827448	3.59519	4.73848	0.002705
1824	109	144	T	20	75	124	89	3.87	4.01	1	lalt	TRUE	0.430564	3	0.551714	TRUE	8.57861	6.1417	-3.33067	FALSE	FALSE	35	0.0884696	3.49867	4.7314	0.000419672
1825	109	145	I	80	157	193	131	3.6	4.56	1	lalt	TRUE	1.07764	3	0.864857	TRUE	1.31442	7.9137	2.11316	FALSE	FALSE	13	0.0873554	3.51696	4.72451	0.000401633
1826	109	146	O	40	157	193	131	4.98	3.99	0	ralt	TRUE	1.35484	3	0.348286	FALSE	-6.72589	-10.8916	5.61848	FALSE	FALSE	19	0.0134771	6.21335	4.73124	0.00158199
1827	109	147	D	40	76	154	68	4.45	5.13	0	lalt	FALSE	0.808927	3	0.553143	TRUE	-2.94893	-13.3414	2.6028	FALSE	FALSE	6	0.0143314	6.12468	4.7375	0.0026654
1828	109	148	O	40	0	168	107	4.32	4.1	1	ralt	FALSE	0.675982	3	0.334857	FALSE	5.68824	17.6198	-5.69304	FALSE	FALSE	20	0.0697293	3.84209	4.73238	0.00153859
1829	109	149	O	40	0	168	107	4.62	3.57	1	lalt	TRUE	0.766124	3	0.461429	TRUE	-5.54924	4.31542	-0.461629	FALSE	FALSE	20	0.0747578	3.74163	4.7268	0.00106674
1830	109	150	D	40	157	193	131	3.62	4.88	0	lalt	FALSE	0.844247	3	0.603714	TRUE	4.02446	7.83386	2.71321	FALSE	FALSE	7	0.0134916	6.2118	4.7334	0.0015553
1831	109	151	I	80	3	121	112	3.75	5.38	0	ralt	TRUE	0.8524	3	0.604571	TRUE	-4.48539	-11.0945	3.62138	FALSE	FALSE	15	0.0169509	5.8825	4.73843	0.0023766
1832	109	152	T	20	75	124	89	4.59	3.83	1	lalt	TRUE	0.247523	3	0.447714	TRUE	1.2685	1.96009	0.818568	FALSE	FALSE	35	0.0900241	3.47355	4.73154	0.00123413
1833	109	153	O	40	0	168	107	4.19	3.66	1	ralt	FALSE	0.803777	3	0.261429	FALSE	-0.185833	-1.88899	4.14706	FALSE	FALSE	20	0.0784666	3.67178	4.72573	0.000389973
1834	109	154	A	20	76	154	68	5.12	5.45	1	ralt	FALSE	0.618845	3	0.492571	TRUE	0.0119982	-7.81226	3.1679	FALSE	FALSE	0	0.0563059	4.15057	4.7224	0.000511985
1835	109	155	A	20	76	154	68	4.98	3.54	1	lalt	TRUE	0.665825	3	0.361143	FALSE	3.76663	13.1917	-6.60865	FALSE	FALSE	0	0.0612467	4.02922	4.71849	0.00124575
1836	109	156	I	80	157	193	131	5.15	4.84	1	lalt	TRUE	1.14604	3	0.396286	FALSE	4.89506	9.43742	-5.39291	FALSE	FALSE	13	0.087559	3.5136	4.71205	0.000450807
1837	109	157	T	20	3	121	112	4.24	4.98	0	ralt	TRUE	0.441943	3	0.686857	TRUE	-7.01185	-4.06147	2.49876	FALSE	FALSE	33	0.0211164	5.56549	4.71562	0.000985452
1838	109	158	A	20	76	154	68	4.54	4.89	1	lalt	TRUE	0.407178	3	0.447429	TRUE	5.29407	-2.43766	-2.60869	FALSE	FALSE	0	0.0654542	3.93337	4.71135	0.00104895
1839	109	159	A	20	138	154	91	4.09	4.19	0	ralt	TRUE	0.564136	3	0.438857	TRUE	6.48598	5.18451	5.86228	FALSE	FALSE	4	0.0146105	6.09685	4.71727	0.00136951
1840	109	160	R	80	138	154	91	4.52	4.06	1	lalt	TRUE	0.485254	3	0.441429	TRUE	4.54	5.79079	-4.87315	FALSE	FALSE	28	0.101367	3.30234	4.70993	0.00126315
1841	109	161	I	80	157	193	131	5.45	4.42	1	ralt	FALSE	0.902419	3	0.757429	TRUE	2.81792	-0.358961	-7.55047	FALSE	FALSE	13	0.0904128	3.46733	4.70347	0.000307088
1842	109	162	T	20	138	154	91	4.55	5.37	0	ralt	TRUE	0.725451	3	0.736	TRUE	-7.20398	-12.1576	7.18772	FALSE	FALSE	34	0.0194397	5.68485	4.70755	0.000995837
1843	109	163	D	40	3	121	112	4.66	3.66	1	ralt	FALSE	0.894473	3	0.770286	TRUE	6.23321	4.43494	-0.26672	FALSE	FALSE	9	0.0605859	4.04487	4.70396	0.00108362
1844	109	164	R	80	75	124	89	4.66	4.14	0	lalt	FALSE	0.641626	3	0.456571	TRUE	1.59357	-5.02901	-1.6181	FALSE	FALSE	29	0.0161321	5.95392	4.70919	0.00123032
1845	109	165	T	20	75	124	89	3.78	3.99	1	lalt	TRUE	0.242777	3	0.734	TRUE	-5.49611	-6.33695	13.1184	FALSE	FALSE	35	0.0891768	3.48719	4.70296	0.00113188
1846	109	166	A	20	76	154	68	4.71	4.63	1	lalt	TRUE	0.31292	3	0.261714	FALSE	5.15549	5.32754	6.02493	FALSE	FALSE	0	0.0678124	3.88231	4.69868	0.000377494
1847	109	167	A	20	0	168	107	4.83	3.89	0	lalt	FALSE	0.426104	3	0.431143	TRUE	1.54821	0.885196	-14.6181	FALSE	FALSE	2	0.0151501	6.04453	4.70426	0.00122442
1848	109	168	A	20	3	121	112	4.03	5.47	0	ralt	TRUE	0.574227	3	0.399714	FALSE	-1.6629	1.96381	3.92582	FALSE	FALSE	3	0.0199778	5.64546	4.70806	0.00176829
1849	109	169	O	40	0	168	107	5.27	4.62	1	lalt	TRUE	0.789284	3	0.599429	TRUE	5.14166	12.8453	-9.22748	FALSE	FALSE	20	0.0772204	3.69487	4.70295	0.000944714
1850	109	170	R	80	157	193	131	4.7	3.99	0	lalt	FALSE	0.780294	3	0.362857	FALSE	4.82809	2.09352	-5.69189	FALSE	FALSE	25	0.0105331	6.56893	4.71057	0.00155194
1851	109	171	O	40	3	121	112	3.64	4.2	0	ralt	TRUE	1.13239	3	0.643714	TRUE	-8.40901	-27.8239	10.3571	FALSE	FALSE	21	0.0188679	5.72792	4.71466	0.0021508
1852	109	172	A	20	75	124	89	4.96	4.65	0	ralt	TRUE	0.523587	3	0.569143	TRUE	-10.9138	-32.3966	24.4874	FALSE	FALSE	5	0.0174165	5.8434	4.7192	0.00162566
1853	109	173	I	80	138	154	91	5.29	5.22	0	lalt	FALSE	0.889617	3	0.733429	TRUE	-4.98463	-20.3683	9.70851	FALSE	FALSE	16	0.00984021	6.6671	4.72704	0.00225622
1854	109	174	O	40	0	168	107	5.14	4.15	1	lalt	TRUE	0.919501	3	0.664286	TRUE	0.014932	-5.01681	6.96661	FALSE	FALSE	20	0.0801438	3.64127	4.72171	0.00157789
1855	109	175	D	40	3	121	112	5.4	4.45	1	ralt	FALSE	0.640591	3	0.588571	TRUE	2.09055	6.87309	2.52128	FALSE	FALSE	9	0.0618796	4.01439	4.71814	0.000387869
1856	109	176	O	40	0	168	107	3.62	4.23	1	lalt	TRUE	0.767702	3	0.880286	TRUE	1.08516	6.11213	-20.3276	FALSE	FALSE	20	0.0841047	3.57167	4.71259	0.000375483
1857	109	177	I	80	0	168	107	4.43	5.04	0	ralt	TRUE	0.489904	3	0.672286	TRUE	-2.03353	1.50036	-7.41467	FALSE	FALSE	14	0.0117814	6.40735	4.71933	0.00131584
1858	109	178	I	80	75	124	89	4.01	3.75	0	ralt	TRUE	0.626971	3	0.326286	FALSE	11.645	8.16598	-3.22263	FALSE	FALSE	17	0.0101393	6.6239	4.72685	0.0024771
1859	109	179	O	40	0	168	107	5.2	4.44	1	ralt	FALSE	0.794065	3	0.545143	TRUE	-4.12634	-5.80442	-16.0915	FALSE	FALSE	20	0.0875823	3.51322	4.72107	0.00145764
1860	109	180	D	40	3	121	112	5.29	3.71	1	ralt	FALSE	0.640578	4	0.574857	TRUE	-0.581481	-16.0889	18.14	FALSE	FALSE	9	0.0650769	3.94171	4.71727	0.000342905
1861	109	181	D	40	0	168	107	5.31	4.96	0	ralt	TRUE	0.46165	4	0.513429	TRUE	-3.02535	-15.7251	6.62213	FALSE	FALSE	8	0.0164334	5.92723	4.72198	0.00102052
1862	109	182	A	20	0	168	107	3.78	5.29	0	lalt	FALSE	0.374655	4	0.658	TRUE	0.184756	-3.9056	-10.3727	FALSE	FALSE	2	0.0186948	5.74122	4.7259	0.00153637
1863	109	183	A	20	76	154	68	5.36	4.75	1	lalt	TRUE	1.13871	4	0.293714	FALSE	6.72801	-3.83561	6.09553	FALSE	FALSE	0	0.0671147	3.89723	4.72193	0.000903987
1864	109	184	O	40	75	124	89	5.07	3.73	0	ralt	TRUE	0.995735	4	0.324	FALSE	4.81349	1.95638	-2.95835	FALSE	FALSE	23	0.0106346	6.55508	4.72901	0.00138807
1865	109	185	D	40	3	121	112	5.04	4.49	1	ralt	FALSE	0.709852	4	0.612857	TRUE	1.42245	2.65813	1.36103	FALSE	FALSE	9	0.0681294	3.87558	4.72497	0.00137705
1866	109	186	I	80	75	124	89	5.45	4.11	0	ralt	TRUE	0.686881	4	0.637143	TRUE	-1.89984	-4.29999	-5.89737	FALSE	FALSE	17	0.0142784	6.13002	4.73036	0.00107931
1867	109	187	D	40	3	121	112	4.2	4.75	1	ralt	FALSE	0.943898	4	0.202286	FALSE	4.66836	0.494666	9.38448	FALSE	FALSE	9	0.0720027	3.79581	4.726	0.00106198
1868	109	188	R	80	138	154	91	5.43	5.44	1	lalt	TRUE	0.76701	4	0.126571	FALSE	-7.27283	-6.06522	10.2823	FALSE	FALSE	28	0.0931604	3.42414	4.72008	0.000289547
1869	109	189	A	20	157	193	131	4.9	5.23	0	ralt	TRUE	1.13193	4	0.597429	TRUE	-1.38384	2.46177	-9.49473	FALSE	FALSE	1	0.0119078	6.39195	4.72642	0.00115952
1870	109	190	D	40	3	121	112	3.73	4.92	1	ralt	FALSE	0.655943	4	0.363429	FALSE	4.68245	-3.22115	-0.578617	FALSE	FALSE	9	0.0754717	3.72792	4.72186	0.00118752
1871	109	191	I	80	0	168	107	3.54	5.35	0	ralt	TRUE	0.63406	4	0.526571	TRUE	5.81808	1.77428	5.92661	FALSE	FALSE	14	0.0154601	6.01531	4.72672	0.000952464
1872	109	192	I	80	157	193	131	5.05	4.14	1	ralt	FALSE	1.04014	4	0.451429	TRUE	6.92182	6.10518	0.107125	FALSE	FALSE	13	0.0825058	3.59936	4.72164	0.000931939
1873	109	193	R	80	3	121	112	5.03	4.57	0	lalt	FALSE	1.1292	4	0.128	FALSE	1.6372	-4.50465	-6.18167	FALSE	FALSE	27	0.00947516	6.72163	4.72909	0.00137265
1874	109	194	I	80	157	193	131	5.09	3.63	1	lalt	TRUE	0.458249	4	0.678286	TRUE	-3.02757	-6.78108	-3.94861	FALSE	FALSE	13	0.0861362	3.53724	4.72379	0.00135885
1875	109	195	A	20	76	154	68	3.58	4.94	1	lalt	TRUE	0.686364	4	0.396	FALSE	-0.24935	3.73443	4.49044	FALSE	FALSE	0	0.0679572	3.87923	4.71997	0.000294438
1876	109	196	D	40	3	121	112	4.01	4.4	1	lalt	TRUE	0.380506	4	0.819429	TRUE	-1.96814	-1.08998	-4.24777	FALSE	FALSE	9	0.0778302	3.68353	4.71536	0.000308077
1877	109	197	O	40	0	168	107	3.57	4.59	1	ralt	FALSE	1.03065	4	0.611143	TRUE	-2.45125	6.00963	8.3038	FALSE	FALSE	20	0.0851081	3.55456	4.71026	0.000267563
1878	109	198	T	20	75	124	89	3.76	5.3	1	lalt	TRUE	0.581787	4	0.313714	FALSE	-8.96705	-5.96546	11.5691	FALSE	FALSE	35	0.0808741	3.62818	4.70551	0.000259124
1879	109	199	T	20	76	154	68	5.15	3.56	0	ralt	TRUE	0.349905	4	0.223714	FALSE	4.33365	11.6764	-4.13103	FALSE	FALSE	30	0.0121236	6.36603	4.7116	0.00107221
1880	109	200	I	80	157	193	131	4.34	3.94	1	ralt	FALSE	1.13701	4	0.812857	TRUE	-4.1156	-1.09165	-4.82309	FALSE	FALSE	13	0.0881836	3.50335	4.70637	0.0010538
1881	109	201	D	40	138	154	91	3.77	4.26	0	ralt	TRUE	0.715165	4	0.600286	TRUE	-1.78761	-6.57814	9.06886	FALSE	FALSE	10	0.0105883	6.56138	4.7131	0.0011654
1882	109	202	R	80	0	168	107	3.92	4.84	0	lalt	FALSE	0.636387	4	0.557143	TRUE	-1.81506	-1.98329	2.092	FALSE	FALSE	26	0.00983035	6.66854	4.72016	0.00215563
1883	109	203	R	80	157	193	131	5.04	4.47	0	lalt	FALSE	0.58746	4	0.557429	TRUE	2.16399	-1.36212	-5.01812	FALSE	FALSE	25	0.0132628	6.23647	4.72563	0.00194429
1884	109	204	R	80	76	154	68	5.16	3.53	0	lalt	FALSE	0.962495	4	0.691714	TRUE	-1.19019	-3.59597	4.72866	FALSE	FALSE	24	0.00927673	6.75217	4.73287	0.00198711
1885	109	205	A	20	76	154	68	4.44	5.11	1	lalt	TRUE	0.639592	4	0.655143	TRUE	3.41863	9.45595	-8.0969	FALSE	FALSE	0	0.0692868	3.85128	4.72906	0.00129953
1886	109	206	A	20	76	154	68	4.5	5.5	1	lalt	TRUE	0.409692	4	0.615143	TRUE	-3.43858	-10.7223	0.780709	FALSE	FALSE	0	0.0731327	3.77334	4.72498	0.000635163
1887	109	207	T	20	75	124	89	3.62	4.01	1	lalt	TRUE	0.572777	4	0.495429	TRUE	-5.30242	-5.65251	4.89242	FALSE	FALSE	35	0.0819939	3.60834	4.72027	0.000261207
1888	109	208	R	80	138	154	91	4.89	4.62	1	lalt	TRUE	0.766915	4	0.627143	TRUE	-0.969931	-2.54339	1.26977	FALSE	FALSE	28	0.0896226	3.47999	4.71509	0.000229659
1889	109	209	I	80	157	193	131	3.79	4.98	1	lalt	TRUE	0.713975	4	0.326286	FALSE	-1.47464	-0.406898	2.96635	FALSE	FALSE	13	0.0890258	3.48963	4.70998	0.000216584
1890	109	210	T	20	76	154	68	3.68	4.4	0	ralt	TRUE	0.578023	4	0.326286	FALSE	3.12662	12.3424	-3.50009	FALSE	FALSE	30	0.0156466	5.99801	4.71451	0.000784776
1891	109	211	O	40	0	168	107	3.94	5.13	1	lalt	TRUE	0.547274	4	0.630571	TRUE	2.3944	-6.61039	-3.3969	FALSE	FALSE	20	0.0843327	3.56776	4.70976	0.000787895
1892	109	212	I	80	76	154	68	3.58	4.26	0	ralt	TRUE	0.393392	4	0.699429	TRUE	0.104006	-0.833427	-2.15934	FALSE	FALSE	12	0.00920572	6.76325	4.7169	0.00120606
1893	109	213	D	40	3	121	112	3.67	3.92	1	lalt	TRUE	0.787577	4	0.746286	TRUE	-9.32176	-4.67783	3.95115	FALSE	FALSE	9	0.0765325	3.70778	4.71273	0.0012139
1894	109	214	A	20	157	193	131	4.78	4.81	0	ralt	TRUE	1.45871	4	0.524286	TRUE	9.61379	4.10972	7.43849	FALSE	FALSE	1	0.014717	6.08637	4.71749	0.000820823
1895	109	215	I	80	157	193	131	4.47	4.28	1	lalt	TRUE	0.473791	4	0.537143	TRUE	3.87896	0.279664	-4.0286	FALSE	FALSE	13	0.0908818	3.45987	4.71239	0.000793791
1896	109	216	O	40	138	154	91	4.2	4.97	0	ralt	TRUE	0.595903	4	0.382571	FALSE	-5.65679	-4.88337	2.05452	FALSE	FALSE	22	0.0106319	6.55545	4.71874	0.00102992
1897	109	217	D	40	3	121	112	4.41	4.57	1	lalt	TRUE	0.523003	4	0.791143	TRUE	-0.264841	6.01746	0.600858	FALSE	FALSE	9	0.0792751	3.65699	4.71443	0.00104263
1898	109	218	O	40	157	193	131	4.9	4.5	0	ralt	TRUE	1.27303	4	0.738857	TRUE	2.60177	-0.182341	-9.07126	FALSE	FALSE	19	0.0135938	6.20091	4.71952	0.000844111
1899	109	219	D	40	76	154	68	4.23	3.63	0	ralt	TRUE	0.609127	4	0.246571	FALSE	0.69743	3.21025	14.4647	FALSE	FALSE	6	0.0142064	6.13731	4.72435	0.00141752
1900	109	220	R	80	76	154	68	4.84	4.97	0	ralt	TRUE	0.617302	4	0.255429	FALSE	1.44561	-1.67095	6.31954	FALSE	FALSE	24	0.0126032	6.31007	4.72974	0.00145989
1901	109	221	D	40	3	121	112	4.65	4.51	1	lalt	TRUE	0.357273	4	0.212857	FALSE	-3.04909	-0.201215	8.24846	FALSE	FALSE	9	0.0819323	3.60942	4.72528	0.000875929
1902	109	222	O	40	138	154	91	4.4	4.68	0	ralt	TRUE	0.925364	4	0.324857	FALSE	4.23215	5.33705	-7.58512	FALSE	FALSE	22	0.0142606	6.13182	4.73002	0.000783419
1903	109	223	A	20	76	154	68	3.51	4.19	1	lalt	TRUE	0.207553	4	0.798571	TRUE	2.6008	7.06631	-2.9494	FALSE	FALSE	0	0.0721935	3.79199	4.72628	0.000796653
1904	109	224	I	80	157	193	131	4.01	4.12	1	lalt	TRUE	0.742753	4	0.425143	TRUE	-7.46053	3.74868	4.62727	FALSE	FALSE	13	0.091582	3.44879	4.72128	0.000217148
1905	109	225	R	80	3	121	112	5.31	4.35	0	ralt	TRUE	1.12687	4	0.384571	FALSE	-3.28884	-2.52761	0.674225	FALSE	FALSE	27	0.0121449	6.36351	4.72677	0.000861183
1906	109	226	T	20	75	124	89	4.55	4.58	1	lalt	TRUE	0.189959	4	0.347429	FALSE	7.93746	4.46356	-0.67983	FALSE	FALSE	35	0.0798646	3.6463	4.72255	0.000873501
1907	109	227	R	80	0	168	107	3.91	4.14	0	ralt	TRUE	1.45598	4	0.952286	TRUE	0.543755	0.110785	-0.175963	FALSE	FALSE	26	0.0126982	6.29923	4.72778	0.000833839
1908	109	228	A	20	76	154	68	5.11	3.65	1	lalt	TRUE	0.315237	4	1	TRUE	2.20709	6.65126	-5.77041	FALSE	FALSE	0	0.0746141	3.74441	4.72394	0.000838692
1909	109	229	D	40	157	193	131	4.06	5.05	0	ralt	TRUE	0.610308	4	0.263714	FALSE	0.282594	-14.2561	5.23178	FALSE	FALSE	7	0.0132431	6.23861	4.72894	0.000802695
1910	109	230	R	80	138	154	91	3.53	5.19	1	ralt	FALSE	0.563411	4	0.781429	TRUE	-6.05344	-4.46865	2.31562	FALSE	FALSE	28	0.0859696	3.54003	4.72438	0.00078141
1911	109	231	O	40	75	124	89	3.63	5.17	0	ralt	TRUE	0.798491	4	0.567714	TRUE	2.91215	14.7606	-0.187864	FALSE	FALSE	23	0.0125079	6.32101	4.72961	0.000811399
1912	109	232	D	40	3	121	112	4.71	4.9	1	lalt	TRUE	0.824609	4	0.433143	TRUE	2.16364	0.40536	-9.87943	FALSE	FALSE	9	0.0823008	3.60295	4.72532	0.000812722
1913	109	233	D	40	138	154	91	4.69	4.32	0	ralt	TRUE	1.14562	4	0.372857	FALSE	-4.60544	-4.83924	5.65705	FALSE	FALSE	10	0.0130462	6.26022	4.73031	0.00077735
1914	109	234	O	40	0	168	107	5.46	3.8	1	ralt	FALSE	0.517658	4	0.657429	TRUE	-3.39289	3.92172	-4.25059	FALSE	FALSE	20	0.0808526	3.62856	4.72614	0.000775844
1915	109	235	I	80	76	154	68	4.45	4.09	0	ralt	TRUE	0.580822	4	0.640571	TRUE	8.92784	3.63232	-11.5759	FALSE	FALSE	12	0.0121145	6.36713	4.73144	0.000816847
1916	109	236	A	20	76	154	68	4.44	4.72	1	lalt	TRUE	0.25792	4	0.304286	FALSE	-7.44027	-11.2207	13.2476	FALSE	FALSE	0	0.076096	3.71604	4.72761	0.000820418
1917	109	237	R	80	138	154	91	3.77	4.73	1	ralt	FALSE	0.697059	4	0.318286	FALSE	16.0673	18.5447	-2.11405	FALSE	FALSE	28	0.0874283	3.51576	4.72309	0.000195364
1918	109	238	A	20	138	154	91	4.63	4.67	0	ralt	TRUE	0.802173	4	0.764286	TRUE	-0.135269	-1.21494	-4.08904	FALSE	FALSE	4	0.0140477	6.15353	4.72767	0.000699172
1919	109	239	I	80	138	154	91	3.79	4.9	0	lalt	FALSE	0.614278	4	0.571714	TRUE	2.41301	-6.41128	-4.00015	FALSE	FALSE	16	0.0111149	6.49136	4.73329	0.00136338
1920	110	0	D	80	138	154	91	5.18	4.07	1	ralt	TRUE	0.960061	1	0	FALSE	-11.1645	-3.91698	19.2015	FALSE	FALSE	10	0.128931	2.95533	4.55679	0.00339089
1921	110	1	O	40	157	193	131	4.02	3.93	0	lalt	TRUE	1.02608	1	0.0934286	FALSE	4.07842	-25.341	7.73454	FALSE	FALSE	19	0.018358	5.76745	4.56942	0.0214918
1922	110	2	T	80	75	124	89	4.63	4.35	0	ralt	FALSE	1.15421	1	0	FALSE	3.62827	-21.7617	20.9657	FALSE	FALSE	35	0.00446872	7.80592	4.60636	0.0637908
1923	110	3	O	40	0	168	107	3.53	4.14	1	lalt	FALSE	1.39525	1	0	FALSE	3.12509	7.45971	9.5308	FALSE	FALSE	20	0.0696662	3.8434	4.5818	0.0494399
1924	110	4	I	20	75	124	89	4.16	4.64	0	ralt	FALSE	0.915431	1	0	FALSE	5.57099	0.468912	13.0284	FALSE	FALSE	17	0.0127358	6.29496	4.60152	0.0265305
1925	110	5	R	40	3	121	112	3.66	4.17	0	ralt	FALSE	0.854531	1	0	FALSE	13.0133	-12.164	3.79965	FALSE	FALSE	27	0.016567	5.91555	4.61536	0.0381373
1926	110	6	O	40	0	168	107	3.98	4.49	1	ralt	TRUE	2.19761	1	0.191143	FALSE	1.2894	-17.5355	4.69225	FALSE	FALSE	20	0.0884996	3.49819	4.58562	0.0199885
1927	110	7	D	80	138	154	91	4.9	3.84	1	lalt	FALSE	2.43762	1	0	FALSE	11.4423	19.6221	5.51596	FALSE	FALSE	10	0.131198	2.93018	4.54563	0.00527194
1928	110	8	R	40	157	193	131	4.09	4.73	1	missing	FALSE		1	0.181143	FALSE	8.19941	-6.38326	-7.14863	TRUE	TRUE	25	0.0591767	4.07883	4.53012	0.00671022
1929	110	9	I	20	76	154	68	3.83	5.17	1	lalt	FALSE	0.885685	1	0	FALSE	10.8157	-2.36716	14.1313	FALSE	FALSE	12	0.0352201	4.82746	4.52864	0.0122616
1930	110	10	I	20	3	121	112	3.66	4.35	0	ralt	FALSE	0.887762	1	0.129714	FALSE	0.482913	-13.1655	5.39413	FALSE	FALSE	15	0.0172272	5.85916	4.54307	0.0209853
1931	110	11	A	20	138	154	91	4.04	4.92	0	lalt	TRUE	1.2589	1	0	FALSE	11.0593	7.62006	11.1434	FALSE	FALSE	4	0.018065	5.79066	4.55618	0.0258267
1932	110	12	O	40	157	193	131	4.18	4.48	0	lalt	TRUE	1.33596	1	0	FALSE	8.68999	-2.30197	8.28439	FALSE	FALSE	19	0.0349843	4.83715	4.55481	0.019105
1933	110	13	A	20	3	121	112	3.96	3.7	0	ralt	FALSE	1.20604	1	0.146571	FALSE	6.55458	-39.3151	0.792988	FALSE	FALSE	3	0.0150173	6.05723	4.57101	0.0202084
1934	110	14	D	80	157	193	131	4.01	5.18	0	ralt	FALSE	0.955209	1	0.215714	FALSE	16.6314	-9.59434	-10.8737	FALSE	FALSE	7	0.00339623	8.20185	4.60691	0.048291
1935	110	15	T	80	3	121	112	4.75	3.7	1	ralt	TRUE	0.832291	1	0.105143	FALSE	9.67015	-4.46107	4.79385	FALSE	FALSE	33	0.0899001	3.47553	4.5826	0.0366235
1936	110	16	A	20	75	124	89	5.18	5.15	1	lalt	FALSE	1.06638	1	0.127429	FALSE	10.0286	4.61164	10.6493	FALSE	FALSE	5	0.0380987	4.71411	4.5794	0.00765913
1937	110	17	I	20	76	154	68	4.73	5.19	1	ralt	TRUE	0.962353	1	0.396286	FALSE	21.1017	9.53511	-10.1169	FALSE	FALSE	12	0.0487718	4.35781	4.57094	0.0094212
1938	110	18	A	20	3	121	112	4.18	3.56	0	lalt	TRUE	1.31732	1	0	FALSE	5.04756	-13.0025	10.4219	FALSE	FALSE	3	0.0321454	4.95925	4.57183	0.00996273
1939	110	19	I	20	75	124	89	5.12	4.96	0	lalt	TRUE	0.297529	1	0	FALSE	18.413	15.1398	-7.97275	FALSE	FALSE	17	0.0274443	5.18735	4.57595	0.0124606
1940	110	20	O	40	0	168	107	5.27	3.8	1	ralt	TRUE	0.885529	1	0	FALSE	-18.6979	-14.7992	4.94888	FALSE	FALSE	20	0.0842318	3.56949	4.55601	0.00857735
1941	110	21	T	80	3	121	112	3.51	5.21	1	ralt	TRUE	1.28856	1	0	FALSE	4.41679	5.06518	13.2371	FALSE	FALSE	33	0.0979808	3.35136	4.53335	0.00369465
1942	110	22	T	80	138	154	91	4.26	4.11	0	lalt	TRUE	0.243715	1	0	FALSE	8.81311	-18.6383	-1.20688	FALSE	FALSE	34	0.00487964	7.67901	4.56391	0.0241874
1943	110	23	A	20	75	124	89	4.1	4.78	1	ralt	TRUE	0.873853	1	0	FALSE	9.55971	-20.0545	12.8816	FALSE	FALSE	5	0.0505277	4.30678	4.55618	0.025409
1944	110	24	R	40	157	193	131	5.33	4.22	1	ralt	TRUE	0.689961	1	0	FALSE	9.94208	13.0018	-4.26691	FALSE	FALSE	25	0.0600629	4.05738	4.54518	0.00580657
1945	110	25	D	80	138	154	91	4.64	3.89	1	lalt	FALSE	1.44395	1	0.182286	FALSE	10.1841	14.1807	0.647368	FALSE	FALSE	10	0.108877	3.19923	4.522	0.00386824
1946	110	26	I	20	75	124	89	4.71	3.84	0	lalt	TRUE	1.34306	1	0	FALSE	9.68744	23.2063	5.72033	FALSE	FALSE	17	0.0404747	4.62683	4.51979	0.00495527
1947	110	27	I	20	76	154	68	3.59	3.67	1	ralt	TRUE	0.425193	1	0	FALSE	8.49584	19.2672	-9.17439	FALSE	FALSE	12	0.0569033	4.13534	4.51107	0.00615844
1948	110	28	R	40	157	193	131	3.72	3.61	1	ralt	TRUE	1.08142	1	0	FALSE	24.5958	14.431	-6.16267	FALSE	FALSE	25	0.071934	3.79718	4.49801	0.00439783
1949	110	29	I	20	76	154	68	4.54	4.7	1	ralt	TRUE	0.354672	1	0	FALSE	5.56897	-28.6642	15.912	FALSE	FALSE	12	0.070537	3.82548	4.48576	0.00376983
1950	110	30	T	80	3	121	112	4.69	3.68	1	ralt	TRUE	0.329782	1	0	FALSE	-16.4555	-1.65772	4.28921	FALSE	FALSE	33	0.0997713	3.32523	4.46704	0.00309614
1951	110	31	T	80	3	121	112	3.65	5.08	1	ralt	TRUE	0.279941	1	0	FALSE	9.19345	10.8382	-37.2689	FALSE	FALSE	33	0.113208	3.14296	4.44639	0.00523899
1952	110	32	T	80	3	121	112	4.61	3.77	1	ralt	TRUE	0.359085	1	0	FALSE	-8.19796	0.304486	26.7285	FALSE	FALSE	33	0.126249	2.98566	4.4242	0.0044659
1953	110	33	A	20	0	168	107	4.87	4.29	0	lalt	TRUE	0.988203	1	0.134571	FALSE	14.5872	17.9642	1.47851	FALSE	FALSE	2	0.0131255	6.25148	4.44184	0.00916387
1954	110	34	I	20	3	121	112	4.97	4.69	0	lalt	TRUE	0.500229	1	0	FALSE	-14.6502	-21.9891	17.532	FALSE	FALSE	15	0.0256065	5.28735	4.44906	0.0127392
1955	110	35	R	40	157	193	131	3.81	4.59	1	ralt	TRUE	2.04923	1	0.092	FALSE	2.97018	1.3174	-4.41796	FALSE	FALSE	25	0.0789264	3.66335	4.4366	0.00589173
1956	110	36	I	20	76	154	68	5.05	4.15	1	ralt	TRUE	0.385394	1	0	FALSE	12.1573	-0.553189	-4.59419	FALSE	FALSE	12	0.0775681	3.68839	4.42481	0.00278765
1957	110	37	R	40	157	193	131	3.68	5.3	1	ralt	TRUE	0.2605	1	0	FALSE	6.89799	-2.00707	1.48022	FALSE	FALSE	25	0.0904626	3.46653	4.41059	0.00251984
1958	110	38	O	40	76	154	68	4.85	3.53	0	ralt	FALSE	0.726595	1	0.122	FALSE	8.47032	-6.49552	-1.24119	FALSE	FALSE	18	0.00764916	7.03048	4.43423	0.0122855
1959	110	39	D	80	138	154	91	5.37	4.13	1	lalt	FALSE	1.68866	1	0.189429	FALSE	-5.28041	-28.9806	18.5031	FALSE	FALSE	10	0.101887	3.29496	4.41817	0.0119522
1960	110	40	A	20	0	168	107	3.69	4.76	0	lalt	TRUE	1.17269	1	0.139429	FALSE	21.537	9.37938	-21.8635	FALSE	FALSE	2	0.0250745	5.31764	4.42575	0.00490927
1961	110	41	R	40	138	154	91	4.12	3.87	0	lalt	TRUE	1.97372	1	0	FALSE	21.8879	20.8236	-4.03377	FALSE	FALSE	28	0.00808625	6.95031	4.44798	0.0139432
1962	110	42	I	20	76	154	68	3.85	3.67	1	ralt	TRUE	0.501917	1	0	FALSE	9.62934	28.5783	11.215	FALSE	FALSE	12	0.0844219	3.56624	4.43562	0.0109724
1963	110	43	D	80	76	154	68	4.87	5.06	0	ralt	FALSE	1.20709	1	0	FALSE	7.91717	0.0962478	23.2259	FALSE	FALSE	6	0.00143301	9.44674	4.47052	0.0287002
1964	110	44	R	40	0	168	107	4.77	5.31	0	lalt	TRUE	1.58404	1	0	FALSE	11.7439	15.5154	-35.9618	FALSE	FALSE	26	0.00778302	7.00545	4.49205	0.0369343
1965	110	45	R	40	75	124	89	5.12	3.64	0	ralt	FALSE	1.60698	1	0.237429	FALSE	3.86549	-19.662	12.8638	FALSE	FALSE	29	0.00908456	6.78237	4.51147	0.0179314
1966	110	46	T	80	157	193	131	4.55	4.26	0	lalt	TRUE	0.651073	1	0	FALSE	7.56177	1.35087	8.67156	FALSE	FALSE	31	0.00414174	7.91555	4.53802	0.0226596
1967	110	47	O	40	138	154	91	4.4	3.92	0	ralt	FALSE	1.11016	1	0.160571	FALSE	-7.68955	-32.1	13.2255	FALSE	FALSE	22	0.00750171	7.05857	4.55861	0.0235024
1968	110	48	O	40	76	154	68	5.16	4.49	0	ralt	FALSE	1.29827	1	0.178286	FALSE	12.0316	9.50307	5.7019	FALSE	FALSE	18	0.0186433	5.7452	4.56814	0.0135354
1969	110	49	A	20	0	168	107	5.13	4.7	0	ralt	FALSE	0.984268	1	0.142	FALSE	10.3849	23.3587	-14.4576	FALSE	FALSE	2	0.0341842	4.87052	4.56915	0.00668816
1970	110	50	A	20	157	193	131	5.08	5.33	0	ralt	FALSE	1.7212	1	0.127143	FALSE	-9.09899	-12.3669	17.2046	FALSE	FALSE	1	0.00987275	6.66233	4.58602	0.00946781
1971	110	51	I	20	138	154	91	5.11	4.5	0	lalt	TRUE	1.37614	1	0	FALSE	18.1195	18.1479	0.78517	FALSE	FALSE	16	0.0110605	6.49844	4.60132	0.0133497
1972	110	52	T	80	0	168	107	5.35	4.92	0	lalt	TRUE	0.510213	1	0.186857	FALSE	-2.00741	-31.5591	19.2996	FALSE	FALSE	32	0.00450257	7.79503	4.625	0.0183827
1973	110	53	D	80	0	168	107	4.57	3.97	0	lalt	TRUE	0.833224	1	0	FALSE	-7.81419	24.599	-8.92223	FALSE	FALSE	8	0.00381598	8.03373	4.64952	0.0252379
1974	110	54	T	80	3	121	112	5.06	5.27	1	ralt	TRUE	0.434341	1	0	FALSE	7.19643	-13.8973	-22.2834	FALSE	FALSE	33	0.106499	3.23109	4.63322	0.0137375
1975	110	55	O	40	3	121	112	3.81	4.34	0	lalt	TRUE	0.814328	1	0	FALSE	18.1003	22.7168	-11.8746	FALSE	FALSE	21	0.00808625	6.95031	4.65082	0.00812509
1976	110	56	A	20	75	124	89	5	5.5	1	ralt	TRUE	0.666474	1	0.214286	FALSE	17.434	0.907292	3.48142	FALSE	FALSE	5	0.0432732	4.53038	4.6478	0.00906199
1977	110	57	T	80	3	121	112	5.43	3.71	1	ralt	TRUE	0.266436	1	0	FALSE	7.72656	0.951677	4.4203	FALSE	FALSE	33	0.113816	3.13522	4.63109	0.00215575
1978	110	58	I	20	0	168	107	5.08	4.31	0	ralt	FALSE	0.97161	1	0.145714	FALSE	-5.18681	2.45999	-8.93749	FALSE	FALSE	14	0.0114412	6.44962	4.64478	0.00590653
1979	110	59	O	40	0	168	107	5.29	4.28	1	lalt	FALSE	1.31057	1	0	FALSE	23.7997	-3.32382	-3.94669	FALSE	FALSE	20	0.0601787	4.0546	4.63747	0.00640364
1980	110	60	T	80	75	124	89	5.08	4.62	0	lalt	TRUE	0.655695	2	0	FALSE	1.25285	6.30778	17.5119	FALSE	FALSE	35	0.0121855	6.35869	4.65022	0.00598438
1981	110	61	I	20	76	154	68	3.86	5.44	1	ralt	TRUE	0.48374	2	0	FALSE	4.46581	-0.939001	-16.5943	FALSE	FALSE	12	0.0781949	3.67678	4.63944	0.00563851
1982	110	62	D	80	138	154	91	3.8	4.84	1	lalt	FALSE	1.66275	2	0.139714	FALSE	5.31806	-13.9955	6.1425	FALSE	FALSE	10	0.0881787	3.50343	4.62722	0.00143499
1983	110	63	A	20	75	124	89	4.43	4.36	1	lalt	FALSE	1.46181	2	0	FALSE	10.1217	-22.8996	-3.65521	FALSE	FALSE	5	0.0503145	4.31288	4.62279	0.00187179
1984	110	64	O	40	0	168	107	4.48	4.86	1	ralt	TRUE	1.36486	2	0	FALSE	-1.00989	-17.7763	-4.32289	FALSE	FALSE	20	0.0671698	3.89604	4.61465	0.00207396
1985	110	65	T	80	3	121	112	5.08	4.02	1	ralt	TRUE	0.331942	2	0	FALSE	-20.4062	-39.7957	20.6823	FALSE	FALSE	33	0.114702	3.12404	4.59951	0.00131678
1986	110	66	D	80	157	193	131	5.2	4.41	0	lalt	TRUE	0.56999	2	0	FALSE	4.25041	9.16377	-10.2747	FALSE	FALSE	7	0.0114687	6.44615	4.61274	0.00508166
1987	110	67	I	20	76	154	68	5.38	4.79	1	ralt	TRUE	0.496084	2	0	FALSE	17.1071	5.24996	-6.10306	FALSE	FALSE	12	0.0833486	3.5847	4.60215	0.00523153
1988	110	68	R	40	157	193	131	3.56	4.19	1	ralt	TRUE	1.44005	2	0	FALSE	11.1052	-3.76663	4.72639	FALSE	FALSE	25	0.0731132	3.77372	4.59346	0.00137208
1989	110	69	D	80	138	154	91	5.48	4.85	1	ralt	TRUE	1.12721	2	0	FALSE	1.81085	-2.35102	14.9397	FALSE	FALSE	10	0.0918239	3.44499	4.582	0.00128067
1990	110	70	T	80	0	168	107	4.71	5.27	0	lalt	TRUE	0.350221	2	0	FALSE	15.5838	1.71436	-8.06614	FALSE	FALSE	32	0.0131719	6.24639	4.59365	0.0043885
1991	110	71	T	80	138	154	91	4.85	4.19	0	lalt	TRUE	0.351246	2	0	FALSE	8.32665	34.7165	-48.5671	FALSE	FALSE	34	0.0119908	6.38192	4.60606	0.007897
1992	110	72	O	40	138	154	91	4.95	3.58	0	lalt	TRUE	1.30129	2	0	FALSE	1.01673	14.727	-6.7514	FALSE	FALSE	22	0.0150245	6.05654	4.616	0.00736289
1993	110	73	I	20	76	154	68	4.86	4.99	1	ralt	TRUE	0.446362	2	0	FALSE	17.3201	-0.0513462	-6.51957	FALSE	FALSE	12	0.0879349	3.50742	4.60532	0.00381967
1994	110	74	D	80	75	124	89	4.14	4.21	0	lalt	TRUE	0.70545	2	0	FALSE	-1.04061	16.5887	-3.47793	FALSE	FALSE	11	0.0025729	8.60239	4.62918	0.0126259
1995	110	75	R	40	75	124	89	4.3	5.34	0	lalt	TRUE	0.497597	2	0	FALSE	-4.29512	-9.6469	18.5348	FALSE	FALSE	29	0.0156383	5.99877	4.63831	0.0150171
1996	110	76	R	40	76	154	68	3.5	4.19	0	lalt	TRUE	0.930607	2	0.161143	FALSE	-0.577515	-7.23823	8.81849	FALSE	FALSE	24	0.00657008	7.24987	4.65523	0.00914775
1997	110	77	O	40	0	168	107	4.51	5.35	1	ralt	TRUE	1.09781	2	0	FALSE	2.43845	-17.766	-2.87848	FALSE	FALSE	20	0.0682919	3.87214	4.64763	0.00675994
1998	110	78	O	40	76	154	68	3.71	4.44	0	lalt	TRUE	0.377869	2	0	FALSE	14.4782	27.2215	-1.96011	FALSE	FALSE	18	0.0225091	5.47335	4.65269	0.00273637
[truncated: 9,281 more rows]
